# Supplementary material for: Single-cell Transcriptomics of Postimplantation Embryos: Unveiling Aneuploidy Effects and Lineage Dynamics
Source: Research Square preprint supplement (doi:10.21203/rs.3.rs-4111897/v1), 2024-03-22
Supplement: Supplementary file 3 [file 308296328b8fe5d1cdde46cb.xlsx]

## Sheet: ligand_receptor_interactions
source	target	ligand	receptor	prob	pval	interaction_name	pathway_name	annotation	evidence	source.target	prob.original
Aneuploid	Aneuploid	CDH5	CDH5	0.148021	3	CDH5_CDH5	CDH5	Cell-Cell Contact	KEGG: hsa04514	Aneuploid -> Aneuploid	0.00116413
Euploid	Aneuploid	CDH5	CDH5	0.108135	3	CDH5_CDH5	CDH5	Cell-Cell Contact	KEGG: hsa04514	Euploid -> Aneuploid	9.63362752143215e-05
Aneuploid	Euploid	CDH5	CDH5	0.108135	3	CDH5_CDH5	CDH5	Cell-Cell Contact	KEGG: hsa04514	Aneuploid -> Euploid	9.63362752143215e-05
Euploid	Euploid	F11R	F11R	0.198015	3	F11R_F11R	JAM	Cell-Cell Contact	KEGG: hsa04514	Euploid -> Euploid	0.00640855
Aneuploid	Euploid	GAS6	TYRO3	0.0937268	2	GAS6_TYRO3	GAS	Secreted Signaling	PMID: 27801848	Aneuploid -> Euploid	2.32477047563464e-05
Euploid	Euploid	GAS6	TYRO3	0.0940074	3	GAS6_TYRO3	GAS	Secreted Signaling	PMID: 27801848	Euploid -> Euploid	2.39998695068875e-05
Aneuploid	Aneuploid	GDF15	TGFBR2	0.207578	3	GDF15_TGFBR2	GDF	Secreted Signaling	KEGG: hsa04350	Aneuploid -> Aneuploid	0.00808725
Aneuploid	Euploid	GDF15	TGFBR2	0.189367	3	GDF15_TGFBR2	GDF	Secreted Signaling	KEGG: hsa04350	Aneuploid -> Euploid	0.00508863
Aneuploid	Euploid	IGF2	ITGA6_ITGB4	0.0862867	3	IGF2_ITGA6_ITGB4	IGF	Secreted Signaling	PMID: 28190785; PMID: 28873464	Aneuploid -> Euploid	9.2649735390607e-06
Aneuploid	Aneuploid	IGF2	IGF1R	0.0717271	3	IGF2_IGF1R	IGF	Secreted Signaling	PMID: 14604834	Aneuploid -> Aneuploid	8.81415344423421e-07
Euploid	Aneuploid	IGF2	IGF1R	0.0685067	3	IGF2_IGF1R	IGF	Secreted Signaling	PMID: 14604834	Euploid -> Aneuploid	4.57675086898315e-07
Aneuploid	Euploid	IGF2	IGF1R	0.0670217	3	IGF2_IGF1R	IGF	Secreted Signaling	PMID: 14604834	Aneuploid -> Euploid	3.31198389605927e-07
Euploid	Euploid	MPZL1	MPZL1	0.224329	3	MPZL1_MPZL1	MPZ	Cell-Cell Contact	KEGG: hsa04514	Euploid -> Euploid	0.0115886
Aneuploid	Euploid	NECTIN3	NECTIN2	0.23557	3	NECTIN3_NECTIN2	NECTIN	Cell-Cell Contact	PMID: 23027581	Aneuploid -> Euploid	0.0143353
Euploid	Euploid	NECTIN3	NECTIN2	0.190478	3	NECTIN3_NECTIN2	NECTIN	Cell-Cell Contact	PMID: 23027581	Euploid -> Euploid	0.00524774
Aneuploid	Aneuploid	PDGFA	PDGFRA	0.0649577	2	PDGFA_PDGFRA	PDGF	Secreted Signaling	PMID: 15207812	Aneuploid -> Aneuploid	2.06157120096702e-07
Euploid	Aneuploid	PTN	ALK	0.146077	3	PTN_ALK	PTN	Secreted Signaling	PMID: 28356350; PMID: 25620911	Euploid -> Aneuploid	0.001064
Euploid	Euploid	PTN	ALK	0.140593	3	PTN_ALK	PTN	Secreted Signaling	PMID: 28356350; PMID: 25620911	Euploid -> Euploid	0.000814668
Euploid	Euploid	PTN	NCL	0.480086	3	PTN_NCL	PTN	Secreted Signaling	PMID: 28356350; PMID: 25620911	Euploid -> Euploid	0.124561
Euploid	Euploid	PTN	SDC4	0.29753	3	PTN_SDC4	PTN	Secreted Signaling	PMID: 28356350; PMID: 25620911	Euploid -> Euploid	0.0347005
Aneuploid	Aneuploid	SEMA4D	PLXNB1	0.0581953	3	SEMA4D_PLXNB1	SEMA4	Cell-Cell Contact	PMID: 27533782	Aneuploid -> Aneuploid	3.44579270720614e-08
Euploid	Aneuploid	SEMA4D	PLXNB1	0.0540157	3	SEMA4D_PLXNB1	SEMA4	Cell-Cell Contact	PMID: 27533782	Euploid -> Aneuploid	9.11684737390835e-09
Aneuploid	Euploid	SEMA4D	PLXNB1	0.0540157	3	SEMA4D_PLXNB1	SEMA4	Cell-Cell Contact	PMID: 27533782	Aneuploid -> Euploid	9.11684737390837e-09
Aneuploid	Aneuploid	SEMA4D	PLXNB2	0.0474234	3	SEMA4D_PLXNB2	SEMA4	Cell-Cell Contact	PMID: 27533782	Aneuploid -> Aneuploid	6.95320272011295e-10
Aneuploid	Euploid	SEMA4D	PLXNB2	0.0472218	3	SEMA4D_PLXNB2	SEMA4	Cell-Cell Contact	PMID: 27533782	Aneuploid -> Euploid	6.35455864378029e-10
Aneuploid	Aneuploid	TGFB3	ACVR1_TGFbR	0.117253	3	TGFB3_ACVR1_TGFBR1	TGFb	Secreted Signaling	PMID: 29376829	Aneuploid -> Aneuploid	0.000197735
Aneuploid	Euploid	TGFB3	ACVR1_TGFbR	0.109427	3	TGFB3_ACVR1_TGFBR1	TGFb	Secreted Signaling	PMID: 29376829	Aneuploid -> Euploid	0.000107443
Aneuploid	Aneuploid	TGFB3	ACVR1B_TGFbR2	0.124495	3	TGFB3_ACVR1B_TGFBR2	TGFb	Secreted Signaling	PMID: 27449815	Aneuploid -> Aneuploid	0.000324747
Aneuploid	Euploid	TGFB3	ACVR1B_TGFbR2	0.124967	3	TGFB3_ACVR1B_TGFBR2	TGFb	Secreted Signaling	PMID: 27449815	Aneuploid -> Euploid	0.000334746
Aneuploid	Aneuploid	TGFB3	TGFbR1_R2	0.144568	3	TGFB3_TGFBR1_TGFBR2	TGFb	Secreted Signaling	KEGG: hsa04350	Aneuploid -> Aneuploid	0.000990655
Aneuploid	Euploid	TGFB3	TGFbR1_R2	0.132321	3	TGFB3_TGFBR1_TGFBR2	TGFb	Secreted Signaling	KEGG: hsa04350	Aneuploid -> Euploid	0.000522242
