# Supplementary material for: Single-cell Transcriptomics of Postimplantation Embryos: Unveiling Aneuploidy Effects and Lineage Dynamics
Source: Research Square preprint supplement (doi:10.21203/rs.3.rs-4111897/v1), 2024-03-22
Supplement: Supplementary file 4 [file 8194191a739a85df65bf3cc9.xlsx]

## Sheet: Sheet 1
Cell	losschr1	gainchr1	losschr2	gainchr2	losschr3	gainchr3	losschr4	gainchr4	losschr5	gainchr5	losschr6	gainchr6	losschr7	gainchr7	losschr8	gainchr8	losschr9	gainchr9	losschr10	gainchr10	losschr11	gainchr11	losschr12	gainchr12	losschr13	gainchr13	losschr14	gainchr14	losschr15	gainchr15	losschr16	gainchr16	losschr17	gainchr17	losschr18	gainchr18	losschr20	gainchr20	losschr21	gainchr21	losschr22	gainchr22	sumchr1	sumchr2	sumchr3	sumchr4	sumchr5	sumchr6	sumchr7
lib230524_AAACCCAGTTCTTGCC-1	0	0	0	0	0	0	0	0	0	0	0	0	0	1	0	0	0	0	0	0	0	0	0	0	0	0	0	0	0	0	0	0	0	0	0	0	0	0	0	0	0	0	0	0	0	0	0	0	1
lib230524_AAACGAAAGTAGGGTC-1	0	0	0	0	0	0	0	0	0	0	0	0	0	1	0	0	0	0	0	0	0	0	0	0	0	0	0	0	0	0	0	0	0	0	0	0	0	0	0	0	0	0	0	0	0	0	0	0	1
lib230524_AAACGAAGTTAATGAG-1	0	0	0	0.0868687	0	0	0	0.120155	0	0	0	0	0	0	0	0	0	0.37276	0	0	0	0	0	0	0	0	0.0909091	0	0	0.215517	0	0	0	0	0	0	0	0	0	0	0	0	0	0.0868687	0	0.120155	0	0	0
lib230524_AAACGAATCCATCTCG-1	0	0	0	0	0	0	0	0	0	0	0	0	0	1	0	0	0	0	0	0	0	0	0	0	0	0	0	0	0	0	0	0	0	0	0	0	0	0	0	0	0	0	0	0	0	0	0	0	1
lib230524_AAACGAATCTTGATTC-1	0	0	0	0	0	0	0	0	0	0	0	0	0	1	0	0	0	0	0	0	0	0	0	0	0	0	0	0	0	0	0	0	0	0	0	0	0	0	0	0	0	0	0	0	0	0	0	0	1
lib230524_AAAGAACAGCGTACAG-1	0	0	0	0	0	0	0	0	0	0	0	0	0	0	0	0	0	0	0	0	0	0.101149	0	0	0	0	0	0	0	0.258621	0	0	0	0	0	0	0	0	0	0	0	0	0	0	0	0	0	0	0
lib230524_AAAGGGCCACAGCTTA-1	0	0	0	0	0	0	0	0	0	0	0	0	0	0	0	0	0	0	0	0	0	0.101149	0	0	0	0	0	0	0	0.258621	0	0	0	0	0	0	0	0	0	0	0	0	0	0	0	0	0	0	0
lib230524_AAAGGGCCACCTGCAG-1	0	0	0	0	0	0	0	0	0	0	0	0	0	1	0	0	0	0	0	0	0	0	0	0	0	0	0	0	0	0	0	0	0	0	0	0	0	0	0	0	0	0	0	0	0	0	0	0	1
lib230524_AAAGGGCCAGCTGAAG-1	0	0	0	0	0	0	0	0	0	0	0	0	0	0	0	0	0	0	0	0	0	0	0	0	0	0	0	0	0	0	0	0	0	0	0	0	0	0	0	0	0	0	0	0	0	0	0	0	0
lib230524_AAAGGGCCAGTAGTTC-1	0	0.182313	0	0	0	0	0	0	0	0	0	0	0	0	0	0.163934	0	0.232975	0	0	0	0.232184	0	0	0	0	0	0	0	0.224138	0	0	0	0	0	0	0	0	0	0	0	0	0.182313	0	0	0	0	0	0
lib230524_AAAGGGCGTGAGATCG-1	0	0	0	0	0	0	0	0	0	0	0	0	0	1	0	0	0	0	0	0	0	0	0	0	0	0	0	0	0	0	0	0	0	0	0	0	0	0	0	0	0	0	0	0	0	0	0	0	1
lib230524_AAAGGGCGTTAACCTG-1	0.0653061	0	0	0	0	0.124088	0	0.205426	0	0	0	0	0	0.884058	0	0.254098	0	0.444444	0	0.219697	0	0.114943	0	0	0	0	0.0988142	0	0	0	0	0	0.103529	0	0	0	0	0	0	0	0	0	0.0653061	0	0.124088	0.205426	0	0	0.884058
lib230524_AAAGTCCGTCTGATCA-1	0	0	0	0	0	0	0.372093	0	0	0	0	0	0	0	0	0	0	0	0	0	0	0	0	0	0	0	0	0	0	0.336207	0	0	0	0	0	0	0	0	0	0	0	0	0	0	0	0.372093	0	0	0
lib230524_AACAAGACAGGTTACT-1	0.0571429	0	0	0	0	0.145985	0	0.112403	0	0	0	0	0	0	0	0.188525	0	0	0	0	0	0.0827586	0	0	0	0	0	0	0	0.168103	0	0	0	0	0	0	0	0	0	0	0	0	0.0571429	0	0.145985	0.112403	0	0	0
lib230524_AACACACCAGACCGCT-1	0.0598639	0.122449	0	0.167677	0	0.413625	0	0	0	0	0	0.060686	0	0	0	0	0	0.390681	0	0.32197	0	0	0	0	0	0.47619	0	0	0	0.366379	0.141447	0	0	0	0	0.508772	0	0	0	0.585714	0	0	0.182313	0.167677	0.413625	0	0	0.060686	0
lib230524_AACCAACCAGGTATGG-1	0	0	0	0	0	0	0	0	0	0	0	0	0	1	0	0	0	0	0	0	0	0	0	0	0	0	0	0	0	0	0	0	0	0	0	0	0	0	0	0	0	0	0	0	0	0	0	0	1
lib230524_AACCAACGTTGTGGCC-1	0	0	0	0	0	0	0	0	0	0	0	0	0	0	0	0	0	0.146953	0	0	0	0	0	0.711172	0	0	0	0	0	0.202586	0	0	0	0	0	0	0	0	0	1	0	0	0	0	0	0	0	0	0
lib230524_AACCAACTCCTACTGC-1	0.0571429	0	0	0	0	0.145985	0	0.112403	0	0	0	0	0	0	0	0.188525	0	0	0	0	0	0.0827586	0	0	0	0	0	0	0	0.168103	0	0	0	0	0	0	0	0	0	0	0	0	0.0571429	0	0.145985	0.112403	0	0	0
lib230524_AACCATGCAGGGTCTC-1	0	0	0	0	0	0	0	0	0	0	0	0	0	1	0	0	0	0	0	0	0	0	0	0	0	0	0	0	0	0	0	0	0	0	0	0	0	0	0	0	0	0	0	0	0	0	0	0	1
lib230524_AACCCAAGTAGATGTA-1	0	0	0	0	0	0	0	0	0	0	0	0	0	0	0	0	0	0	0	0	0	0	0	0	0	0	0	0	0	0	0	0	0	0	0	0	0	0	0	0	0	0	0	0	0	0	0	0	0
lib230524_AACCCAATCTACACAG-1	0	0	0	0	0	0	0	0	0	0	0	0	0	1	0	0	0	0	0	0	0	0	0	0	0	0	0	0	0	0	0	0	0	0	0	0	0	0	0	0	0	0	0	0	0	0	0	0	1
lib230524_AACCTTTAGAGTCAGC-1	0	0.167347	0	0	0	0	0	0.162791	0	0	0	0	0	0	0	0.188525	0	0.129032	0	0	0	0	0	0	0	0	0	0	0	0	0	0	0	0.251765	0	0	0	0	0	0	0	0	0.167347	0	0	0.162791	0	0	0
lib230524_AACGAAAAGTGAGTTA-1	0	0	0	0	0	0	0	0	0	0	0	0	0	0	0	0	0	0	0	0	0	0.101149	0	0	0	0	0	0	0	0.258621	0	0	0	0	0	0	0	0	0	0	0	0	0	0	0	0	0	0	0
lib230524_AACGTCAGTCGATGCC-1	0	0	0	0	0	0	0	0	0	0	0	0	0	1	0	0	0	0	0	0	0	0	0	0	0	0	0	0	0	0	0	0	0	0	0	0	0	0	0	0	0	0	0	0	0	0	0	0	1
lib230524_AACTTCTAGCCGTCGT-1	0	0	0	0	0	0	0	0	0	0	0	0	0	0	0	0	0	0	0	0	0	0.101149	0	0	0	0	0	0	0	0.258621	0	0	0	0	0	0	0	0	0	0	0	0	0	0	0	0	0	0	0
lib230524_AACTTCTTCACCTCGT-1	0.0653061	0	0	0	0	0.124088	0	0.205426	0	0	0	0	0	0.884058	0	0.254098	0	0.444444	0	0.219697	0	0.114943	0	0	0	0	0.0988142	0	0	0	0	0	0.103529	0	0	0	0	0	0	0	0	0	0.0653061	0	0.124088	0.205426	0	0	0.884058
lib230524_AAGACAATCCTCCACA-1	0	0	0	0	0	0	0	0	0	0	0	0	0	0	0	0	0	0.146953	0	0	0	0	0	0.711172	0	0	0	0	0	0.202586	0	0	0	0	0	0	0	0	0	1	0	0	0	0	0	0	0	0	0
lib230524_AAGATAGGTTCCTACC-1	0.0653061	0	0	0	0	0.124088	0	0.205426	0	0	0	0	0	0.884058	0	0.254098	0	0.444444	0	0.219697	0	0.114943	0	0	0	0	0.0988142	0	0	0	0	0	0.103529	0	0	0	0	0	0	0	0	0	0.0653061	0	0.124088	0.205426	0	0	0.884058
lib230524_AAGCCATTCACCATGA-1	0	0	0	0.0868687	0	0	0	0.120155	0	0	0	0	0	0	0	0	0	0.37276	0	0	0	0	0	0	0	0	0.0909091	0	0	0.215517	0	0	0	0	0	0	0	0	0	0	0	0	0	0.0868687	0	0.120155	0	0	0
lib230524_AAGCGTTTCCAACTAG-1	0	0	0	0	0	0	0	0	0	0	0	0	0	0	0	0	0	0.146953	0	0	0	0	0	0.711172	0	0	0	0	0	0.202586	0	0	0	0	0	0	0	0	0	1	0	0	0	0	0	0	0	0	0
lib230524_AAGGAATGTACGATCT-1	0	0	0	0.0868687	0	0	0	0.120155	0	0	0	0	0	0	0	0	0	0.37276	0	0	0	0	0	0	0	0	0.0909091	0	0	0.215517	0	0	0	0	0	0	0	0	0	0	0	0	0	0.0868687	0	0.120155	0	0	0
lib230524_AAGGTAAAGGGAGAAT-1	0	0	0	0	0	0	0.372093	0	0	0	0	0	0	0	0	0	0	0	0	0	0	0	0	0	0	0	0	0	0	0.336207	0	0	0	0	0	0	0	0	0	0	0	0	0	0	0	0.372093	0	0	0
lib230524_AAGGTAAGTAACATCC-1	0	0	0	0	0	0	0	0	0	0	0	0	0	0	0	0	0	0	0	0	0	0	0	0	0	0	0	0	0	0	0	0	0	0	0	0	0	0	0	0	0	0	0	0	0	0	0	0	0
lib230524_AAGGTAAGTCTCTCTG-1	0	0	0	0.0868687	0	0	0	0.120155	0	0	0	0	0	0	0	0	0	0.37276	0	0	0	0	0	0	0	0	0.0909091	0	0	0.215517	0	0	0	0	0	0	0	0	0	0	0	0	0	0.0868687	0	0.120155	0	0	0
lib230524_AAGTACCCAATTGCGT-1	0	0	0	0	0	0	0	0	0	0	0	0	0	0	0	0	0	0.480287	0	0	0	0.0988506	0	0.604905	0	0	0	0	0	0.142241	0	0	0	0	0	0	0	0	0	0	0	0	0	0	0	0	0	0	0
lib230524_AAGTACCTCCCGTTGT-1	0	0	0	0	0	0	0	0	0	0	0	0	0	1	0	0	0	0	0	0	0	0	0	0	0	0	0	0	0	0	0	0	0	0	0	0	0	0	0	0	0	0	0	0	0	0	0	0	1
lib230524_AAGTCGTAGACGCATG-1	0	0.182313	0	0	0	0	0	0	0	0	0	0	0	0	0	0.163934	0	0.232975	0	0	0	0.232184	0	0	0	0	0	0	0	0.224138	0	0	0	0	0	0	0	0	0	0	0	0	0.182313	0	0	0	0	0	0
lib230524_AAGTTCGAGCATACTC-1	0	0	0	0	0	0	0	0	0	0	0	0	0	1	0	0	0	0	0	0	0	0	0	0	0	0	0	0	0	0	0	0	0	0	0	0	0	0	0	0	0	0	0	0	0	0	0	0	1
lib230524_AATAGAGGTAGCTAAA-1	0.0571429	0	0	0	0	0.145985	0	0.112403	0	0	0	0	0	0	0	0.188525	0	0	0	0	0	0.0827586	0	0	0	0	0	0	0	0.168103	0	0	0	0	0	0	0	0	0	0	0	0	0.0571429	0	0.145985	0.112403	0	0	0
lib230524_AATCGACCATACTGAC-1	0	0	0	0	0	0	0	0	0	0	0	0	0	0	0	0	0	0.480287	0	0	0	0.0988506	0	0.604905	0	0	0	0	0	0.142241	0	0	0	0	0	0	0	0	0	0	0	0	0	0	0	0	0	0	0
lib230524_AATCGTGTCCACACAA-1	0.0571429	0	0	0	0	0.145985	0	0.112403	0	0	0	0	0	0	0	0.188525	0	0	0	0	0	0.0827586	0	0	0	0	0	0	0	0.168103	0	0	0	0	0	0	0	0	0	0	0	0	0.0571429	0	0.145985	0.112403	0	0	0
lib230524_AATGAAGAGAAGGATG-1	0	0	0	0	0	0	0	0	0	0	0	0	0	0	0	0	0	0	0	0	0	0.101149	0	0	0	0	0	0	0	0.258621	0	0	0	0	0	0	0	0	0	0	0	0	0	0	0	0	0	0	0
lib230524_AATGAAGGTACTAAGA-1	0	0	0	0	0	0	0.372093	0	0	0	0	0	0	0	0	0	0	0	0	0	0	0	0	0	0	0	0	0	0	0.336207	0	0	0	0	0	0	0	0	0	0	0	0	0	0	0	0.372093	0	0	0
lib230524_AATGACCGTCGCCACA-1	0.0598639	0.122449	0	0.167677	0	0.413625	0	0	0	0	0	0.060686	0	0	0	0	0	0.390681	0	0.32197	0	0	0	0	0	0.47619	0	0	0	0.366379	0.141447	0	0	0	0	0.508772	0	0	0	0.585714	0	0	0.182313	0.167677	0.413625	0	0	0.060686	0
lib230524_AATGGAAAGGTAAGAG-1	0	0	0	0	0	0	0	0	0	0	0	0	0	1	0	0	0	0	0	0	0	0	0	0	0	0	0	0	0	0	0	0	0	0	0	0	0	0	0	0	0	0	0	0	0	0	0	0	1
lib230524_AATGGAAAGGTTACCT-1	0.0571429	0	0	0	0	0.145985	0	0.112403	0	0	0	0	0	0	0	0.188525	0	0	0	0	0	0.0827586	0	0	0	0	0	0	0	0.168103	0	0	0	0	0	0	0	0	0	0	0	0	0.0571429	0	0.145985	0.112403	0	0	0
lib230524_AATGGAACAACTTGCA-1	0.0571429	0	0	0	0	0.145985	0	0.112403	0	0	0	0	0	0	0	0.188525	0	0	0	0	0	0.0827586	0	0	0	0	0	0	0	0.168103	0	0	0	0	0	0	0	0	0	0	0	0	0.0571429	0	0.145985	0.112403	0	0	0
lib230524_AATGGCTTCCGTGGCA-1	0	0	0	0	0	0	0	0	0	0	0	0	0	0	0	0	0	0	0	0	0	0	0	0	0	0	0	0	0	0	0	0	0	0	0	0	0	0	0	0	0	0	0	0	0	0	0	0	0
lib230524_AATTCCTAGACATATG-1	0	0	0	0	0	0	0	0	0	0	0	0	0	1	0	0	0	0	0	0	0	0	0	0	0	0	0	0	0	0	0	0	0	0	0	0	0	0	0	0	0	0	0	0	0	0	0	0	1
lib230524_ACAAGCTAGCCAAGTG-1	0	0	0	0	0	0	0	0	0	0	0	0	0	0	0	0	0	0	0	0	0	0	0	0	0	0	0	0	0	0	0	0	0	0	0	0	0	0	0	0	0	0	0	0	0	0	0	0	0
lib230524_ACACGCGTCTTTCCAA-1	0	0	0	0	0	0	0	0	0	0	0	0	0	0	0	0	0	0	0	0	0	0.101149	0	0	0	0	0	0	0	0.258621	0	0	0	0	0	0	0	0	0	0	0	0	0	0	0	0	0	0	0
lib230524_ACAGCCGGTAGGTTTC-1	0	0	0	0.0868687	0	0	0	0.120155	0	0	0	0	0	0	0	0	0	0.37276	0	0	0	0	0	0	0	0	0.0909091	0	0	0.215517	0	0	0	0	0	0	0	0	0	0	0	0	0	0.0868687	0	0.120155	0	0	0
lib230524_ACAGCCGGTCAAAGAT-1	0	0.771429	0	0	0	0	0	0	0	0	0	0.110818	0	1	0	0	0	0	0	0	0	0	0	0.108992	0	0	0.12253	0	0	0	0	0	0	0	0	0	0	0	0	0	0	0	0.771429	0	0	0	0	0.110818	1
lib230524_ACAGCCGTCGGATTAC-1	0	0	0	0	0	0	0	0	0	0	0	0	0	0	0	0	0	0.146953	0	0	0	0	0	0.711172	0	0	0	0	0	0.202586	0	0	0	0	0	0	0	0	0	1	0	0	0	0	0	0	0	0	0
lib230524_ACATCCCAGTTCAACC-1	0	0	0	0	0	0	0	0	0	0	0	0	0	1	0	0	0	0	0	0	0	0	0	0	0	0	0	0	0	0	0	0	0	0	0	0	0	0	0	0	0	0	0	0	0	0	0	0	1
lib230524_ACATCCCCACCGGAAA-1	0.0653061	0	0	0	0	0.124088	0	0.205426	0	0	0	0	0	0.884058	0	0.254098	0	0.444444	0	0.219697	0	0.114943	0	0	0	0	0.0988142	0	0	0	0	0	0.103529	0	0	0	0	0	0	0	0	0	0.0653061	0	0.124088	0.205426	0	0	0.884058
lib230524_ACATTTCGTCAACCTA-1	0.0653061	0	0	0	0	0.124088	0	0.205426	0	0	0	0	0	0.884058	0	0.254098	0	0.444444	0	0.219697	0	0.114943	0	0	0	0	0.0988142	0	0	0	0	0	0.103529	0	0	0	0	0	0	0	0	0	0.0653061	0	0.124088	0.205426	0	0	0.884058
lib230524_ACCAAACCAACCAACT-1	0	0.182313	0	0	0	0	0	0	0	0	0	0	0	0	0	0.163934	0	0.232975	0	0	0	0.232184	0	0	0	0	0	0	0	0.224138	0	0	0	0	0	0	0	0	0	0	0	0	0.182313	0	0	0	0	0	0
lib230524_ACCAAACTCTCAACCC-1	0.0653061	0	0	0	0	0.124088	0	0.205426	0	0	0	0	0	0.884058	0	0.254098	0	0.444444	0	0.219697	0	0.114943	0	0	0	0	0.0988142	0	0	0	0	0	0.103529	0	0	0	0	0	0	0	0	0	0.0653061	0	0.124088	0.205426	0	0	0.884058
lib230524_ACCATTTAGAAACTGT-1	0.0653061	0	0	0	0	0.124088	0	0.205426	0	0	0	0	0	0.884058	0	0.254098	0	0.444444	0	0.219697	0	0.114943	0	0	0	0	0.0988142	0	0	0	0	0	0.103529	0	0	0	0	0	0	0	0	0	0.0653061	0	0.124088	0.205426	0	0	0.884058
lib230524_ACCATTTCATGGGAAC-1	0	0	0	0	0	0	0	0	0	0	0	0	0	0	0	0	0	0	0	0	0	0	0	0	0	0	0	0	0	0	0	0	0	0	0	0	0	0	0	0	0	0	0	0	0	0	0	0	0
lib230524_ACCCAAACAACGGTAG-1	0	0	0	0	0	0	0	0	0	0	0	0	0	1	0	0	0	0	0	0	0	0	0	0	0	0	0	0	0	0	0	0	0	0	0	0	0	0	0	0	0	0	0	0	0	0	0	0	1
lib230524_ACCCTCACAGCGACCT-1	0.0571429	0	0	0	0	0.145985	0	0.112403	0	0	0	0	0	0	0	0.188525	0	0	0	0	0	0.0827586	0	0	0	0	0	0	0	0.168103	0	0	0	0	0	0	0	0	0	0	0	0	0.0571429	0	0.145985	0.112403	0	0	0
lib230524_ACCCTCATCGCGTAGC-1	0	0	0	0.0868687	0	0	0	0.120155	0	0	0	0	0	0	0	0	0	0.37276	0	0	0	0	0	0	0	0	0.0909091	0	0	0.215517	0	0	0	0	0	0	0	0	0	0	0	0	0	0.0868687	0	0.120155	0	0	0
lib230524_ACCTGAACAAGTTGGG-1	0	0	0	0	0	0	0	0	0	0	0	0	0	1	0	0	0	0	0	0	0	0	0	0	0	0	0	0	0	0	0	0	0	0	0	0	0	0	0	0	0	0	0	0	0	0	0	0	1
lib230524_ACGGTCGTCGAAACAA-1	0	0	0	0	0	0	0	0	0	0	0	0	0	0	0	0	0	0.480287	0	0	0	0.0988506	0	0.604905	0	0	0	0	0	0.142241	0	0	0	0	0	0	0	0	0	0	0	0	0	0	0	0	0	0	0
lib230524_ACGGTTAGTGAATATG-1	0.0571429	0	0	0	0	0.145985	0	0.112403	0	0	0	0	0	0	0	0.188525	0	0	0	0	0	0.0827586	0	0	0	0	0	0	0	0.168103	0	0	0	0	0	0	0	0	0	0	0	0	0.0571429	0	0.145985	0.112403	0	0	0
lib230524_ACGTAACGTTGAATCC-1	0	0	0	0	0	0	0	0	0	0	0	0	0	0	0	0	0	0	0	0	0	0.101149	0	0	0	0	0	0	0	0.258621	0	0	0	0	0	0	0	0	0	0	0	0	0	0	0	0	0	0	0
lib230524_ACGTAACTCATTCGGA-1	0	0	0	0	0	0	0	0	0	0	0	0	0	0	0	0	0	0	0	0	0	0	0	0	0	0	0	0	0	0	0	0	0	0	0	0	0	0	0	0	0	0	0	0	0	0	0	0	0
lib230524_ACGTAACTCGCGCTGA-1	0.0571429	0	0	0	0	0.145985	0	0.112403	0	0	0	0	0	0	0	0.188525	0	0	0	0	0	0.0827586	0	0	0	0	0	0	0	0.168103	0	0	0	0	0	0	0	0	0	0	0	0	0.0571429	0	0.145985	0.112403	0	0	0
lib230524_ACGTACAAGGCACTAG-1	0	0	0	0	0	0	0.372093	0	0	0	0	0	0	0	0	0	0	0	0	0	0	0	0	0	0	0	0	0	0	0.336207	0	0	0	0	0	0	0	0	0	0	0	0	0	0	0	0.372093	0	0	0
lib230524_ACGTACACAGTCTCTC-1	0	0	0	0	0	0	0	0	0	0	0	0	0	0	0	0	0	0.146953	0	0	0	0	0	0.711172	0	0	0	0	0	0.202586	0	0	0	0	0	0	0	0	0	1	0	0	0	0	0	0	0	0	0
lib230524_ACGTACAGTTCCAGGC-1	0.0571429	0	0	0	0	0.145985	0	0.112403	0	0	0	0	0	0	0	0.188525	0	0	0	0	0	0.0827586	0	0	0	0	0	0	0	0.168103	0	0	0	0	0	0	0	0	0	0	0	0	0.0571429	0	0.145985	0.112403	0	0	0
lib230524_ACGTTCCGTATGGTTC-1	0	0	0	0	0	0	0	0	0	0	0	0	0	0	0	0	0	0	0	0	0	0	0	0	0	0	0	0	0	0	0	0	0	0	0	0	0	0	0	0	0	0	0	0	0	0	0	0	0
lib230524_ACGTTCCTCATTGTTC-1	0	0	0	0	0	0	0	0	0	0	0	0	0	0	0	0	0	0.146953	0	0	0	0	0	0.711172	0	0	0	0	0	0.202586	0	0	0	0	0	0	0	0	0	1	0	0	0	0	0	0	0	0	0
lib230524_ACTACGACAATTTCCT-1	0.0598639	0.122449	0	0.167677	0	0.413625	0	0	0	0	0	0.060686	0	0	0	0	0	0.390681	0	0.32197	0	0	0	0	0	0.47619	0	0	0	0.366379	0.141447	0	0	0	0	0.508772	0	0	0	0.585714	0	0	0.182313	0.167677	0.413625	0	0	0.060686	0
lib230524_ACTACGACACTACAGT-1	0	0	0	0	0	0	0	0	0	0	0	0	0	0	0	0	0	0	0	0	0	0.101149	0	0	0	0	0	0	0	0.258621	0	0	0	0	0	0	0	0	0	0	0	0	0	0	0	0	0	0	0
lib230524_ACTATGGCAGAAGCTG-1	0	0	0	0.0868687	0	0	0	0.120155	0	0	0	0	0	0	0	0	0	0.37276	0	0	0	0	0	0	0	0	0.0909091	0	0	0.215517	0	0	0	0	0	0	0	0	0	0	0	0	0	0.0868687	0	0.120155	0	0	0
lib230524_ACTATTCCACTCCACT-1	0	0	0	0.0868687	0	0	0	0.120155	0	0	0	0	0	0	0	0	0	0.37276	0	0	0	0	0	0	0	0	0.0909091	0	0	0.215517	0	0	0	0	0	0	0	0	0	0	0	0	0	0.0868687	0	0.120155	0	0	0
lib230524_ACTATTCGTGGGATTG-1	0	0	0	0.0868687	0	0	0	0.120155	0	0	0	0	0	0	0	0	0	0.37276	0	0	0	0	0	0	0	0	0.0909091	0	0	0.215517	0	0	0	0	0	0	0	0	0	0	0	0	0	0.0868687	0	0.120155	0	0	0
lib230524_ACTATTCGTTATAGCC-1	0	0.167347	0	0	0	0	0	0.162791	0	0	0	0	0	0	0	0.188525	0	0.129032	0	0	0	0	0	0	0	0	0	0	0	0	0	0	0	0.251765	0	0	0	0	0	0	0	0	0.167347	0	0	0.162791	0	0	0
lib230524_ACTATTCTCTGGCTGG-1	0.0571429	0	0	0	0	0.145985	0	0.112403	0	0	0	0	0	0	0	0.188525	0	0	0	0	0	0.0827586	0	0	0	0	0	0	0	0.168103	0	0	0	0	0	0	0	0	0	0	0	0	0.0571429	0	0.145985	0.112403	0	0	0
lib230524_ACTGATGCACGTTGGC-1	0	0	0	0	0	0	0	0	0	0	0	0	0	0	0	0	0	0.146953	0	0	0	0	0	0.711172	0	0	0	0	0	0.202586	0	0	0	0	0	0	0	0	0	1	0	0	0	0	0	0	0	0	0
lib230524_ACTGCAACATCTATCT-1	0	0	0	0	0	0	0	0	0	0	0	0	0	0	0	0	0	0.146953	0	0	0	0	0	0.711172	0	0	0	0	0	0.202586	0	0	0	0	0	0	0	0	0	1	0	0	0	0	0	0	0	0	0
lib230524_ACTGTGAAGTTGGACG-1	0.0571429	0	0	0	0	0.145985	0	0.112403	0	0	0	0	0	0	0	0.188525	0	0	0	0	0	0.0827586	0	0	0	0	0	0	0	0.168103	0	0	0	0	0	0	0	0	0	0	0	0	0.0571429	0	0.145985	0.112403	0	0	0
lib230524_ACTTAGGCATCTCAAG-1	0	0	0	0	0	0	0	0	0	0	0	0	0	0	0	0	0	0.480287	0	0	0	0.0988506	0	0.604905	0	0	0	0	0	0.142241	0	0	0	0	0	0	0	0	0	0	0	0	0	0	0	0	0	0	0
lib230524_ACTTAGGGTAGATCCT-1	0	0	0	0	0	0	0	0	0	0	0	0	0	0	0	0	0	0.146953	0	0	0	0	0	0.711172	0	0	0	0	0	0.202586	0	0	0	0	0	0	0	0	0	1	0	0	0	0	0	0	0	0	0
lib230524_ACTTAGGGTTCTAAGC-1	0.0571429	0	0	0	0	0.145985	0	0.112403	0	0	0	0	0	0	0	0.188525	0	0	0	0	0	0.0827586	0	0	0	0	0	0	0	0.168103	0	0	0	0	0	0	0	0	0	0	0	0	0.0571429	0	0.145985	0.112403	0	0	0
lib230524_ACTTCCGAGCGACTGA-1	0	0	0	0	0	0	0.372093	0	0	0	0	0	0	0	0	0	0	0	0	0	0	0	0	0	0	0	0	0	0	0.336207	0	0	0	0	0	0	0	0	0	0	0	0	0	0	0	0.372093	0	0	0
lib230524_ACTTCGCAGCCTCTTC-1	0.0571429	0	0	0	0	0.145985	0	0.112403	0	0	0	0	0	0	0	0.188525	0	0	0	0	0	0.0827586	0	0	0	0	0	0	0	0.168103	0	0	0	0	0	0	0	0	0	0	0	0	0.0571429	0	0.145985	0.112403	0	0	0
lib230524_ACTTCGCGTGTTCATG-1	0	0	0	0	0	0	0	0	0	0	0	0	0	1	0	0	0	0	0	0	0	0	0	0	0	0	0	0	0	0	0	0	0	0	0	0	0	0	0	0	0	0	0	0	0	0	0	0	1
lib230524_ACTTTCACAATTGCTG-1	0.0653061	0	0	0	0	0.124088	0	0.205426	0	0	0	0	0	0.884058	0	0.254098	0	0.444444	0	0.219697	0	0.114943	0	0	0	0	0.0988142	0	0	0	0	0	0.103529	0	0	0	0	0	0	0	0	0	0.0653061	0	0.124088	0.205426	0	0	0.884058
lib230524_ACTTTGTAGAAAGCGA-1	0	0	0	0	0	0	0	0	0	0	0	0	0	0	0	0	0	0	0	0	0	0.101149	0	0	0	0	0	0	0	0.258621	0	0	0	0	0	0	0	0	0	0	0	0	0	0	0	0	0	0	0
lib230524_AGAAATGAGCTGACAG-1	0.0653061	0	0	0	0	0.124088	0	0.205426	0	0	0	0	0	0.884058	0	0.254098	0	0.444444	0	0.219697	0	0.114943	0	0	0	0	0.0988142	0	0	0	0	0	0.103529	0	0	0	0	0	0	0	0	0	0.0653061	0	0.124088	0.205426	0	0	0.884058
lib230524_AGAAATGCAGCTGTGC-1	0	0	0	0.0868687	0	0	0	0.120155	0	0	0	0	0	0	0	0	0	0.37276	0	0	0	0	0	0	0	0	0.0909091	0	0	0.215517	0	0	0	0	0	0	0	0	0	0	0	0	0	0.0868687	0	0.120155	0	0	0
lib230524_AGAAATGGTGGAGAAA-1	0	0	0	0	0	0	0	0	0	0	0	0	0	0	0	0	0	0	0	0	0	0	0	0	0	0	0	0	0	0	0	0	0	0	0	0	0	0	0	0	0	0	0	0	0	0	0	0	0
lib230524_AGAACAAAGACGAAGA-1	0	0	0	0	0	0	0	0	0	0	0	0	0	1	0	0	0	0	0	0	0	0	0	0	0	0	0	0	0	0	0	0	0	0	0	0	0	0	0	0	0	0	0	0	0	0	0	0	1
lib230524_AGAACAACATTGTAGC-1	0	0.167347	0	0	0	0	0	0.162791	0	0	0	0	0	0	0	0.188525	0	0.129032	0	0	0	0	0	0	0	0	0	0	0	0	0	0	0	0.251765	0	0	0	0	0	0	0	0	0.167347	0	0	0.162791	0	0	0
lib230524_AGAACAAGTGTACAGG-1	0.0598639	0.122449	0	0.167677	0	0.413625	0	0	0	0	0	0.060686	0	0	0	0	0	0.390681	0	0.32197	0	0	0	0	0	0.47619	0	0	0	0.366379	0.141447	0	0	0	0	0.508772	0	0	0	0.585714	0	0	0.182313	0.167677	0.413625	0	0	0.060686	0
lib230524_AGAAGCGCACCGTCGA-1	0	0	0	0	0	0	0	0	0	0	0	0	0	0	0	0	0	0	0	0	0	0.101149	0	0	0	0	0	0	0	0.258621	0	0	0	0	0	0	0	0	0	0	0	0	0	0	0	0	0	0	0
lib230524_AGACAAATCTTCCAGC-1	0.0571429	0	0	0	0	0.145985	0	0.112403	0	0	0	0	0	0	0	0.188525	0	0	0	0	0	0.0827586	0	0	0	0	0	0	0	0.168103	0	0	0	0	0	0	0	0	0	0	0	0	0.0571429	0	0.145985	0.112403	0	0	0
lib230524_AGACTCAAGAAGGGAT-1	0	0	0	0	0	0	0.372093	0	0	0	0	0	0	0	0	0	0	0	0	0	0	0	0	0	0	0	0	0	0	0.336207	0	0	0	0	0	0	0	0	0	0	0	0	0	0	0	0.372093	0	0	0
lib230524_AGACTCACATCTTCGC-1	0	0.182313	0	0	0	0	0	0	0	0	0	0	0	0	0	0.163934	0	0.232975	0	0	0	0.232184	0	0	0	0	0	0	0	0.224138	0	0	0	0	0	0	0	0	0	0	0	0	0.182313	0	0	0	0	0	0
lib230524_AGAGAATGTTCTCTAT-1	0	0	0	0.0868687	0	0	0	0.120155	0	0	0	0	0	0	0	0	0	0.37276	0	0	0	0	0	0	0	0	0.0909091	0	0	0.215517	0	0	0	0	0	0	0	0	0	0	0	0	0	0.0868687	0	0.120155	0	0	0
lib230524_AGAGCAGCAGGTTTAC-1	0	0	0	0	0	0	0	0	0	0	0	0	0	0	0	0	0	0.146953	0	0	0	0	0	0.711172	0	0	0	0	0	0.202586	0	0	0	0	0	0	0	0	0	1	0	0	0	0	0	0	0	0	0
lib230524_AGAGCCCAGCTACTAC-1	0	0	0	0	0	0	0	0	0	0	0	0	0	0	0	0	0	0	0	0	0	0.101149	0	0	0	0	0	0	0	0.258621	0	0	0	0	0	0	0	0	0	0	0	0	0	0	0	0	0	0	0
lib230524_AGAGCCCCACATGGTT-1	0	0	0	0	0	0	0	0	0	0	0	0	0	1	0	0	0	0	0	0	0	0	0	0	0	0	0	0	0	0	0	0	0	0	0	0	0	0	0	0	0	0	0	0	0	0	0	0	1
lib230524_AGATAGAAGACCATAA-1	0	0	0	0.0868687	0	0	0	0.120155	0	0	0	0	0	0	0	0	0	0.37276	0	0	0	0	0	0	0	0	0.0909091	0	0	0.215517	0	0	0	0	0	0	0	0	0	0	0	0	0	0.0868687	0	0.120155	0	0	0
lib230524_AGATAGAAGCACTAAA-1	0	0	0	0	0	0	0	0	0	0	0	0	0	0	0	0	0	0.480287	0	0	0	0.0988506	0	0.604905	0	0	0	0	0	0.142241	0	0	0	0	0	0	0	0	0	0	0	0	0	0	0	0	0	0	0
lib230524_AGATAGAGTGTCATTG-1	0	0	0	0	0	0	0	0	0	0	0	0	0	1	0	0	0	0	0	0	0	0	0	0	0	0	0	0	0	0	0	0	0	0	0	0	0	0	0	0	0	0	0	0	0	0	0	0	1
lib230524_AGATGAACAACTACGT-1	0.0653061	0	0	0	0	0.124088	0	0.205426	0	0	0	0	0	0.884058	0	0.254098	0	0.444444	0	0.219697	0	0.114943	0	0	0	0	0.0988142	0	0	0	0	0	0.103529	0	0	0	0	0	0	0	0	0	0.0653061	0	0.124088	0.205426	0	0	0.884058
lib230524_AGCCAATAGGTAGGCT-1	0	0	0	0	0	0	0	0	0	0	0	0	0	0	0	0	0	0.480287	0	0	0	0.0988506	0	0.604905	0	0	0	0	0	0.142241	0	0	0	0	0	0	0	0	0	0	0	0	0	0	0	0	0	0	0
lib230524_AGCCACGAGGATACGC-1	0	0	0	0	0	0	0	0	0	0	0	0	0	0	0	0	0	0	0	0	0	0.101149	0	0	0	0	0	0	0	0.258621	0	0	0	0	0	0	0	0	0	0	0	0	0	0	0	0	0	0	0
lib230524_AGCCACGTCAGGACGA-1	0	0	0	0	0	0	0	0	0	0	0	0	0	0	0	0	0	0.146953	0	0	0	0	0	0.711172	0	0	0	0	0	0.202586	0	0	0	0	0	0	0	0	0	1	0	0	0	0	0	0	0	0	0
lib230524_AGCGCTGTCTACCTTA-1	0	0	0	0	0	0	0	0	0	0	0	0	0	0	0	0	0	0	0	0	0	0	0	0	0	0	0	0	0	0	0	0	0	0	0	0	0	0	0	0	0	0	0	0	0	0	0	0	0
lib230524_AGCTACAGTAGCTGAG-1	0	0	0	0	0	0	0	0	0	0	0	0	0	0	0	0	0	0.146953	0	0	0	0	0	0.711172	0	0	0	0	0	0.202586	0	0	0	0	0	0	0	0	0	1	0	0	0	0	0	0	0	0	0
lib230524_AGCTACAGTGATTCTG-1	0	0	0	0	0	0	0.372093	0	0	0	0	0	0	0	0	0	0	0	0	0	0	0	0	0	0	0	0	0	0	0.336207	0	0	0	0	0	0	0	0	0	0	0	0	0	0	0	0.372093	0	0	0
lib230524_AGCTCAACAAGTGGAC-1	0.0598639	0.122449	0	0.167677	0	0.413625	0	0	0	0	0	0.060686	0	0	0	0	0	0.390681	0	0.32197	0	0	0	0	0	0.47619	0	0	0	0.366379	0.141447	0	0	0	0	0.508772	0	0	0	0.585714	0	0	0.182313	0.167677	0.413625	0	0	0.060686	0
lib230524_AGCTTCCCACATACGT-1	0.0571429	0	0	0	0	0.145985	0	0.112403	0	0	0	0	0	0	0	0.188525	0	0	0	0	0	0.0827586	0	0	0	0	0	0	0	0.168103	0	0	0	0	0	0	0	0	0	0	0	0	0.0571429	0	0.145985	0.112403	0	0	0
lib230524_AGGAAATCACCGTACG-1	0	0	0	0	0	0	0	0	0	0	0	0	0	0	0	0	0	0	0	0	0	0	0	0	0	0	0	0	0	0	0	0	0	0	0	0	0	0	0	0	0	0	0	0	0	0	0	0	0
lib230524_AGGACTTGTCTGTGAT-1	0	0	0	0	0	0	0	0	0	0	0	0	0	0	0	0	0	0	0	0	0	0.101149	0	0	0	0	0	0	0	0.258621	0	0	0	0	0	0	0	0	0	0	0	0	0	0	0	0	0	0	0
lib230524_AGGACTTTCAATCTTC-1	0	0	0	0	0	0	0	0	0	0	0	0	0	0	0	0	0	0.146953	0	0	0	0	0	0.711172	0	0	0	0	0	0.202586	0	0	0	0	0	0	0	0	0	1	0	0	0	0	0	0	0	0	0
lib230524_AGGAGGTGTATACCTG-1	0	0	0	0	0	0	0.372093	0	0	0	0	0	0	0	0	0	0	0	0	0	0	0	0	0	0	0	0	0	0	0.336207	0	0	0	0	0	0	0	0	0	0	0	0	0	0	0	0.372093	0	0	0
lib230524_AGGAGGTGTCTAGATC-1	0	0	0	0.0868687	0	0	0	0.120155	0	0	0	0	0	0	0	0	0	0.37276	0	0	0	0	0	0	0	0	0.0909091	0	0	0.215517	0	0	0	0	0	0	0	0	0	0	0	0	0	0.0868687	0	0.120155	0	0	0
lib230524_AGGAGGTTCGTGAGAG-1	0	0	0	0	0	0	0	0	0	0	0	0	0	0	0	0	0	0.146953	0	0	0	0	0	0.711172	0	0	0	0	0	0.202586	0	0	0	0	0	0	0	0	0	1	0	0	0	0	0	0	0	0	0
lib230524_AGGATAAGTCTAACGT-1	0	0	0	0	0	0	0	0	0	0	0	0	0	0	0	0	0	0.480287	0	0	0	0.0988506	0	0.604905	0	0	0	0	0	0.142241	0	0	0	0	0	0	0	0	0	0	0	0	0	0	0	0	0	0	0
lib230524_AGGATCTGTATGAGAT-1	0	0	0	0	0	0	0.372093	0	0	0	0	0	0	0	0	0	0	0	0	0	0	0	0	0	0	0	0	0	0	0.336207	0	0	0	0	0	0	0	0	0	0	0	0	0	0	0	0.372093	0	0	0
lib230524_AGGCATTGTCCGTTTC-1	0	0	0	0	0	0	0	0	0	0	0	0	0	0	0	0	0	0	0	0	0	0	0	0	0	0	0	0	0	0	0	0	0	0	0	0	0	0	0	0	0	0	0	0	0	0	0	0	0
lib230524_AGGCATTTCACTACGA-1	0	0	0	0	0	0	0	0	0	0	0	0	0	0	0	0	0	0	0	0	0	0	0	0	0	0	0	0	0	0	0	0	0	0	0	0	0	0	0	0	0	0	0	0	0	0	0	0	0
lib230524_AGGCATTTCGGCATCG-1	0.0571429	0	0	0	0	0.145985	0	0.112403	0	0	0	0	0	0	0	0.188525	0	0	0	0	0	0.0827586	0	0	0	0	0	0	0	0.168103	0	0	0	0	0	0	0	0	0	0	0	0	0.0571429	0	0.145985	0.112403	0	0	0
lib230524_AGGCCACGTTGGAGAC-1	0	0	0	0	0	0	0	0	0	0	0	0	0	0	0	0	0	0	0	0	0	0	0	0	0	0	0	0	0	0	0	0	0	0	0	0	0	0	0	0	0	0	0	0	0	0	0	0	0
lib230524_AGGCCACTCTGCGTCT-1	0	0.167347	0	0	0	0	0	0.162791	0	0	0	0	0	0	0	0.188525	0	0.129032	0	0	0	0	0	0	0	0	0	0	0	0	0	0	0	0.251765	0	0	0	0	0	0	0	0	0.167347	0	0	0.162791	0	0	0
lib230524_AGGCTGCCACTGGCCA-1	0	0	0	0	0	0	0	0	0	0	0	0	0	1	0	0	0	0	0	0	0	0	0	0	0	0	0	0	0	0	0	0	0	0	0	0	0	0	0	0	0	0	0	0	0	0	0	0	1
lib230524_AGGCTGCGTTGGCCTG-1	0	0	0	0	0	0	0.372093	0	0	0	0	0	0	0	0	0	0	0	0	0	0	0	0	0	0	0	0	0	0	0.336207	0	0	0	0	0	0	0	0	0	0	0	0	0	0	0	0.372093	0	0	0
lib230524_AGGGAGTAGCCGTTAT-1	0.0653061	0	0	0	0	0.124088	0	0.205426	0	0	0	0	0	0.884058	0	0.254098	0	0.444444	0	0.219697	0	0.114943	0	0	0	0	0.0988142	0	0	0	0	0	0.103529	0	0	0	0	0	0	0	0	0	0.0653061	0	0.124088	0.205426	0	0	0.884058
lib230524_AGGGCCTAGTAGCTCT-1	0.0571429	0	0	0	0	0.145985	0	0.112403	0	0	0	0	0	0	0	0.188525	0	0	0	0	0	0.0827586	0	0	0	0	0	0	0	0.168103	0	0	0	0	0	0	0	0	0	0	0	0	0.0571429	0	0.145985	0.112403	0	0	0
lib230524_AGGGTCCGTAGGAGTC-1	0	0.167347	0	0	0	0	0	0.162791	0	0	0	0	0	0	0	0.188525	0	0.129032	0	0	0	0	0	0	0	0	0	0	0	0	0	0	0	0.251765	0	0	0	0	0	0	0	0	0.167347	0	0	0.162791	0	0	0
lib230524_AGGGTTTCATCTCGTC-1	0	0	0	0	0	0	0	0	0	0	0	0	0	0	0	0	0	0.146953	0	0	0	0	0	0.711172	0	0	0	0	0	0.202586	0	0	0	0	0	0	0	0	0	1	0	0	0	0	0	0	0	0	0
lib230524_AGGGTTTGTATGGTTC-1	0	0	0	0	0	0	0	0	0	0	0	0	0	1	0	0	0	0	0	0	0	0	0	0	0	0	0	0	0	0	0	0	0	0	0	0	0	0	0	0	0	0	0	0	0	0	0	0	1
lib230524_AGGTCATAGCTTCTAG-1	0	0	0	0.0868687	0	0	0	0.120155	0	0	0	0	0	0	0	0	0	0.37276	0	0	0	0	0	0	0	0	0.0909091	0	0	0.215517	0	0	0	0	0	0	0	0	0	0	0	0	0	0.0868687	0	0.120155	0	0	0
lib230524_AGGTCATAGGTTCACT-1	0	0	0	0	0	0	0	0	0	0	0	0	0	0	0	0	0	0.480287	0	0	0	0.0988506	0	0.604905	0	0	0	0	0	0.142241	0	0	0	0	0	0	0	0	0	0	0	0	0	0	0	0	0	0	0
lib230524_AGGTCTAAGGGCTAAC-1	0	0	0	0	0	0	0	0	0	0	0	0	0	1	0	0	0	0	0	0	0	0	0	0	0	0	0	0	0	0	0	0	0	0	0	0	0	0	0	0	0	0	0	0	0	0	0	0	1
lib230524_AGGTGTTGTTCGGACC-1	0	0	0	0.0868687	0	0	0	0.120155	0	0	0	0	0	0	0	0	0	0.37276	0	0	0	0	0	0	0	0	0.0909091	0	0	0.215517	0	0	0	0	0	0	0	0	0	0	0	0	0	0.0868687	0	0.120155	0	0	0
lib230524_AGGTGTTTCGTTCTGC-1	0	0	0	0	0	0	0	0	0	0	0	0	0	0	0	0	0	0.146953	0	0	0	0	0	0.711172	0	0	0	0	0	0.202586	0	0	0	0	0	0	0	0	0	1	0	0	0	0	0	0	0	0	0
lib230524_AGGTTACTCCGCAGTG-1	0	0	0	0	0	0	0	0	0	0	0	0	0	0	0	0	0	0	0	0	0	0	0	0	0	0	0	0	0	0	0	0	0	0	0	0	0	0	0	0	0	0	0	0	0	0	0	0	0
lib230524_AGTACCAAGAGGTTAT-1	0	0	0	0.0868687	0	0	0	0.120155	0	0	0	0	0	0	0	0	0	0.37276	0	0	0	0	0	0	0	0	0.0909091	0	0	0.215517	0	0	0	0	0	0	0	0	0	0	0	0	0	0.0868687	0	0.120155	0	0	0
lib230524_AGTACCAAGGTGCCAA-1	0	0	0	0	0	0	0	0	0	0	0	0	0	0	0	0	0	0	0	0	0	0	0	0	0	0	0	0	0	0	0	0	0	0	0	0	0	0	0	0	0	0	0	0	0	0	0	0	0
lib230524_AGTACCACACTGTTCC-1	0	0.182313	0	0	0	0	0	0	0	0	0	0	0	0	0	0.163934	0	0.232975	0	0	0	0.232184	0	0	0	0	0	0	0	0.224138	0	0	0	0	0	0	0	0	0	0	0	0	0.182313	0	0	0	0	0	0
lib230524_AGTACCACATAGGAGC-1	0	0	0	0	0	0	0	0	0	0	0	0	0	0	0	0	0	0.146953	0	0	0	0	0	0.711172	0	0	0	0	0	0.202586	0	0	0	0	0	0	0	0	0	1	0	0	0	0	0	0	0	0	0
lib230524_AGTACTGTCGGAGTGA-1	0	0	0	0	0	0	0.372093	0	0	0	0	0	0	0	0	0	0	0	0	0	0	0	0	0	0	0	0	0	0	0.336207	0	0	0	0	0	0	0	0	0	0	0	0	0	0	0	0.372093	0	0	0
lib230524_AGTAGCTTCTCATAGG-1	0	0	0	0	0	0	0	0	0	0	0	0	0	0	0	0	0	0.480287	0	0	0	0.0988506	0	0.604905	0	0	0	0	0	0.142241	0	0	0	0	0	0	0	0	0	0	0	0	0	0	0	0	0	0	0
lib230524_AGTAGCTTCTGAACGT-1	0	0	0	0.0868687	0	0	0	0.120155	0	0	0	0	0	0	0	0	0	0.37276	0	0	0	0	0	0	0	0	0.0909091	0	0	0.215517	0	0	0	0	0	0	0	0	0	0	0	0	0	0.0868687	0	0.120155	0	0	0
lib230524_AGTAGTCCATATACCG-1	0	0	0	0	0	0	0	0	0	0	0	0	0	0	0	0	0	0	0	0	0	0	0	0	0	0	0	0	0	0	0	0	0	0	0	0	0	0	0	0	0	0	0	0	0	0	0	0	0
lib230524_AGTCAACAGCCGGAAT-1	0	0	0	0	0	0	0	0	0	0	0	0	0	1	0	0	0	0	0	0	0	0	0	0	0	0	0	0	0	0	0	0	0	0	0	0	0	0	0	0	0	0	0	0	0	0	0	0	1
lib230524_AGTCACACAAGCTGCC-1	0.0571429	0	0	0	0	0.145985	0	0.112403	0	0	0	0	0	0	0	0.188525	0	0	0	0	0	0.0827586	0	0	0	0	0	0	0	0.168103	0	0	0	0	0	0	0	0	0	0	0	0	0.0571429	0	0.145985	0.112403	0	0	0
lib230524_AGTCTCCGTAATGATG-1	0	0	0	0.0868687	0	0	0	0.120155	0	0	0	0	0	0	0	0	0	0.37276	0	0	0	0	0	0	0	0	0.0909091	0	0	0.215517	0	0	0	0	0	0	0	0	0	0	0	0	0	0.0868687	0	0.120155	0	0	0
lib230524_AGTCTCCGTCACTCTC-1	0.0653061	0	0	0	0	0.124088	0	0.205426	0	0	0	0	0	0.884058	0	0.254098	0	0.444444	0	0.219697	0	0.114943	0	0	0	0	0.0988142	0	0	0	0	0	0.103529	0	0	0	0	0	0	0	0	0	0.0653061	0	0.124088	0.205426	0	0	0.884058
lib230524_AGTCTCCTCGGATACT-1	0	0	0	0	0	0	0.372093	0	0	0	0	0	0	0	0	0	0	0	0	0	0	0	0	0	0	0	0	0	0	0.336207	0	0	0	0	0	0	0	0	0	0	0	0	0	0	0	0.372093	0	0	0
lib230524_AGTGACTTCTGAATCG-1	0	0	0	0.0868687	0	0	0	0.120155	0	0	0	0	0	0	0	0	0	0.37276	0	0	0	0	0	0	0	0	0.0909091	0	0	0.215517	0	0	0	0	0	0	0	0	0	0	0	0	0	0.0868687	0	0.120155	0	0	0
lib230524_AGTGTTGCACAAAGTA-1	0	0	0	0	0	0	0	0	0	0	0	0	0	1	0	0	0	0	0	0	0	0	0	0	0	0	0	0	0	0	0	0	0	0	0	0	0	0	0	0	0	0	0	0	0	0	0	0	1
lib230524_AGTTAGCCAATTTCTC-1	0	0	0	0	0	0	0	0	0	0	0	0	0	0	0	0	0	0	0	0	0	0	0	0	0	0	0	0	0	0	0	0	0	0	0	0	0	0	0	0	0	0	0	0	0	0	0	0	0
lib230524_ATACCTTAGTTACGGG-1	0	0	0	0	0	0	0	0	0	0	0	0	0	1	0	0	0	0	0	0	0	0	0	0	0	0	0	0	0	0	0	0	0	0	0	0	0	0	0	0	0	0	0	0	0	0	0	0	1
lib230524_ATACTTCTCTCGTCAC-1	0.0598639	0.122449	0	0.167677	0	0.413625	0	0	0	0	0	0.060686	0	0	0	0	0	0.390681	0	0.32197	0	0	0	0	0	0.47619	0	0	0	0.366379	0.141447	0	0	0	0	0.508772	0	0	0	0.585714	0	0	0.182313	0.167677	0.413625	0	0	0.060686	0
lib230524_ATCACTTTCCTTACCG-1	0	0	0	0	0	0	0	0	0	0	0	0	0	0	0	0	0	0	0	0	0	0.101149	0	0	0	0	0	0	0	0.258621	0	0	0	0	0	0	0	0	0	0	0	0	0	0	0	0	0	0	0
lib230524_ATCAGGTAGATGCTTC-1	0.0653061	0	0	0	0	0.124088	0	0.205426	0	0	0	0	0	0.884058	0	0.254098	0	0.444444	0	0.219697	0	0.114943	0	0	0	0	0.0988142	0	0	0	0	0	0.103529	0	0	0	0	0	0	0	0	0	0.0653061	0	0.124088	0.205426	0	0	0.884058
lib230524_ATCAGGTGTTTGGAGG-1	0	0	0	0	0	0	0.372093	0	0	0	0	0	0	0	0	0	0	0	0	0	0	0	0	0	0	0	0	0	0	0.336207	0	0	0	0	0	0	0	0	0	0	0	0	0	0	0	0.372093	0	0	0
lib230524_ATCATTCCAACGCATT-1	0	0	0	0	0	0	0	0	0	0	0	0	0	0	0	0	0	0.146953	0	0	0	0	0	0.711172	0	0	0	0	0	0.202586	0	0	0	0	0	0	0	0	0	1	0	0	0	0	0	0	0	0	0
lib230524_ATCATTCGTTGCCGAC-1	0	0	0	0	0	0	0	0	0	0	0	0	0	1	0	0	0	0	0	0	0	0	0	0	0	0	0	0	0	0	0	0	0	0	0	0	0	0	0	0	0	0	0	0	0	0	0	0	1
lib230524_ATCCACCCATGTAACC-1	0	0	0	0	0	0	0	0	0	0	0	0	0	0	0	0	0	0.146953	0	0	0	0	0	0.711172	0	0	0	0	0	0.202586	0	0	0	0	0	0	0	0	0	1	0	0	0	0	0	0	0	0	0
lib230524_ATCCACCTCCATTTGT-1	0	0	0	0	0	0	0	0	0	0	0	0	0	0	0	0	0	0	0	0	0	0.101149	0	0	0	0	0	0	0	0.258621	0	0	0	0	0	0	0	0	0	0	0	0	0	0	0	0	0	0	0
lib230524_ATCCATTTCGTGGGTC-1	0	0	0	0	0	0	0	0	0	0	0	0	0	1	0	0	0	0	0	0	0	0	0	0	0	0	0	0	0	0	0	0	0	0	0	0	0	0	0	0	0	0	0	0	0	0	0	0	1
lib230524_ATCCATTTCTCCGCAT-1	0.0571429	0	0	0	0	0.145985	0	0.112403	0	0	0	0	0	0	0	0.188525	0	0	0	0	0	0.0827586	0	0	0	0	0	0	0	0.168103	0	0	0	0	0	0	0	0	0	0	0	0	0.0571429	0	0.145985	0.112403	0	0	0
lib230524_ATCCCTGAGCCTCTCT-1	0.0571429	0	0	0	0	0.145985	0	0.112403	0	0	0	0	0	0	0	0.188525	0	0	0	0	0	0.0827586	0	0	0	0	0	0	0	0.168103	0	0	0	0	0	0	0	0	0	0	0	0	0.0571429	0	0.145985	0.112403	0	0	0
lib230524_ATCCCTGAGCGTGTCC-1	0	0	0	0	0	0	0	0	0	0	0	0	0	1	0	0	0	0	0	0	0	0	0	0	0	0	0	0	0	0	0	0	0	0	0	0	0	0	0	0	0	0	0	0	0	0	0	0	1
lib230524_ATCCCTGCACACAGCC-1	0	0	0	0.0868687	0	0	0	0.120155	0	0	0	0	0	0	0	0	0	0.37276	0	0	0	0	0	0	0	0	0.0909091	0	0	0.215517	0	0	0	0	0	0	0	0	0	0	0	0	0	0.0868687	0	0.120155	0	0	0
lib230524_ATCCCTGTCAAATGCC-1	0	0	0	0.0868687	0	0	0	0.120155	0	0	0	0	0	0	0	0	0	0.37276	0	0	0	0	0	0	0	0	0.0909091	0	0	0.215517	0	0	0	0	0	0	0	0	0	0	0	0	0	0.0868687	0	0.120155	0	0	0
lib230524_ATCCCTGTCCGTGTAA-1	0	0	0	0	0	0	0.372093	0	0	0	0	0	0	0	0	0	0	0	0	0	0	0	0	0	0	0	0	0	0	0.336207	0	0	0	0	0	0	0	0	0	0	0	0	0	0	0	0.372093	0	0	0
lib230524_ATCCTATCAGAACTTC-1	0	0	0	0	0	0	0	0	0	0	0	0	0	0	0	0	0	0.480287	0	0	0	0.0988506	0	0.604905	0	0	0	0	0	0.142241	0	0	0	0	0	0	0	0	0	0	0	0	0	0	0	0	0	0	0
lib230524_ATCCTATCAGCAAGAC-1	0	0	0	0	0	0	0.372093	0	0	0	0	0	0	0	0	0	0	0	0	0	0	0	0	0	0	0	0	0	0	0.336207	0	0	0	0	0	0	0	0	0	0	0	0	0	0	0	0.372093	0	0	0
lib230524_ATCCTATCATAGAGGC-1	0	0	0	0.0868687	0	0	0	0.120155	0	0	0	0	0	0	0	0	0	0.37276	0	0	0	0	0	0	0	0	0.0909091	0	0	0.215517	0	0	0	0	0	0	0	0	0	0	0	0	0	0.0868687	0	0.120155	0	0	0
lib230524_ATCGCCTAGTCGCGAA-1	0.0571429	0	0	0	0	0.145985	0	0.112403	0	0	0	0	0	0	0	0.188525	0	0	0	0	0	0.0827586	0	0	0	0	0	0	0	0.168103	0	0	0	0	0	0	0	0	0	0	0	0	0.0571429	0	0.145985	0.112403	0	0	0
lib230524_ATCGCCTTCTCGTTTA-1	0.0653061	0	0	0	0	0.124088	0	0.205426	0	0	0	0	0	0.884058	0	0.254098	0	0.444444	0	0.219697	0	0.114943	0	0	0	0	0.0988142	0	0	0	0	0	0.103529	0	0	0	0	0	0	0	0	0	0.0653061	0	0.124088	0.205426	0	0	0.884058
lib230524_ATCGGATCAAATTGGA-1	0	0	0	0	0	0	0	0	0	0	0	0	0	0	0	0	0	0	0	0	0	0.101149	0	0	0	0	0	0	0	0.258621	0	0	0	0	0	0	0	0	0	0	0	0	0	0	0	0	0	0	0
lib230524_ATCGGATGTGGACTAG-1	0	0	0	0	0	0	0	0	0	0	0	0	0	0	0	0	0	0	0	0	0	0	0	0	0	0	0	0	0	0	0	0	0	0	0	0	0	0	0	0	0	0	0	0	0	0	0	0	0
lib230524_ATCGGATTCCACGTAA-1	0	0	0	0	0	0	0	0	0	0	0	0	0	0	0	0	0	0	0	0	0	0.101149	0	0	0	0	0	0	0	0.258621	0	0	0	0	0	0	0	0	0	0	0	0	0	0	0	0	0	0	0
lib230524_ATCGTAGAGCTTTGTG-1	0	0	0	0	0	0	0	0	0	0	0	0	0	0	0	0	0	0	0	0	0	0.101149	0	0	0	0	0	0	0	0.258621	0	0	0	0	0	0	0	0	0	0	0	0	0	0	0	0	0	0	0
lib230524_ATCGTCCCACATATGC-1	0	0	0	0	0	0	0	0	0	0	0	0	0	0	0	0	0	0	0	0	0	0	0	0	0	0	0	0	0	0	0	0	0	0	0	0	0	0	0	0	0	0	0	0	0	0	0	0	0
lib230524_ATCTCTAAGCCTCACG-1	0.0571429	0	0	0	0	0.145985	0	0.112403	0	0	0	0	0	0	0	0.188525	0	0	0	0	0	0.0827586	0	0	0	0	0	0	0	0.168103	0	0	0	0	0	0	0	0	0	0	0	0	0.0571429	0	0.145985	0.112403	0	0	0
lib230524_ATCTCTAGTGAATGTA-1	0.0571429	0	0	0	0	0.145985	0	0.112403	0	0	0	0	0	0	0	0.188525	0	0	0	0	0	0.0827586	0	0	0	0	0	0	0	0.168103	0	0	0	0	0	0	0	0	0	0	0	0	0.0571429	0	0.145985	0.112403	0	0	0
lib230524_ATCTCTATCTTGGAAC-1	0	0	0	0	0	0	0	0	0	0	0	0	0	0	0	0	0	0.480287	0	0	0	0.0988506	0	0.604905	0	0	0	0	0	0.142241	0	0	0	0	0	0	0	0	0	0	0	0	0	0	0	0	0	0	0
lib230524_ATGACCACACTCGATA-1	0	0	0	0	0	0	0	0	0	0	0	0	0	0	0	0	0	0	0	0	0	0	0	0	0	0	0	0	0	0	0	0	0	0	0	0	0	0	0	0	0	0	0	0	0	0	0	0	0
lib230524_ATGCCTCTCAGCTCTC-1	0.0571429	0	0	0	0	0.145985	0	0.112403	0	0	0	0	0	0	0	0.188525	0	0	0	0	0	0.0827586	0	0	0	0	0	0	0	0.168103	0	0	0	0	0	0	0	0	0	0	0	0	0.0571429	0	0.145985	0.112403	0	0	0
lib230524_ATGCGATCATGGGTCC-1	0	0	0	0	0	0	0.372093	0	0	0	0	0	0	0	0	0	0	0	0	0	0	0	0	0	0	0	0	0	0	0.336207	0	0	0	0	0	0	0	0	0	0	0	0	0	0	0	0.372093	0	0	0
lib230524_ATGGATCAGGTTATAG-1	0	0	0	0	0	0	0	0	0	0	0	0	0	0	0	0	0	0	0	0	0	0.101149	0	0	0	0	0	0	0	0.258621	0	0	0	0	0	0	0	0	0	0	0	0	0	0	0	0	0	0	0
lib230524_ATGGATCGTTCGGCTG-1	0	0	0	0	0	0	0	0	0	0	0	0	0	1	0	0	0	0	0	0	0	0	0	0	0	0	0	0	0	0	0	0	0	0	0	0	0	0	0	0	0	0	0	0	0	0	0	0	1
lib230524_ATGGGTTTCACCGGTG-1	0	0	0	0	0	0	0	0	0	0	0	0	0	0	0	0	0	0.480287	0	0	0	0.0988506	0	0.604905	0	0	0	0	0	0.142241	0	0	0	0	0	0	0	0	0	0	0	0	0	0	0	0	0	0	0
lib230524_ATGTCCCCAGCTTTCC-1	0	0	0	0	0	0	0	0	0	0	0	0	0	0	0	0	0	0.146953	0	0	0	0	0	0.711172	0	0	0	0	0	0.202586	0	0	0	0	0	0	0	0	0	1	0	0	0	0	0	0	0	0	0
lib230524_ATGTCTTCACCTATCC-1	0	0	0	0.0868687	0	0	0	0.120155	0	0	0	0	0	0	0	0	0	0.37276	0	0	0	0	0	0	0	0	0.0909091	0	0	0.215517	0	0	0	0	0	0	0	0	0	0	0	0	0	0.0868687	0	0.120155	0	0	0
lib230524_ATGTCTTTCAGCTTGA-1	0	0	0	0	0	0	0	0	0	0	0	0	0	0	0	0	0	0.146953	0	0	0	0	0	0.711172	0	0	0	0	0	0.202586	0	0	0	0	0	0	0	0	0	1	0	0	0	0	0	0	0	0	0
lib230524_ATGTCTTTCTGTAAGC-1	0.0571429	0	0	0	0	0.145985	0	0.112403	0	0	0	0	0	0	0	0.188525	0	0	0	0	0	0.0827586	0	0	0	0	0	0	0	0.168103	0	0	0	0	0	0	0	0	0	0	0	0	0.0571429	0	0.145985	0.112403	0	0	0
lib230524_ATTACCTGTTGTGTAC-1	0	0	0	0	0	0	0	0	0	0	0	0	0	0	0	0	0	0	0	0	0	0	0	0	0	0	0	0	0	0	0	0	0	0	0	0	0	0	0	0	0	0	0	0	0	0	0	0	0
lib230524_ATTACTCTCTGCGAGC-1	0	0	0	0	0	0	0	0	0	0	0	0	0	1	0	0	0	0	0	0	0	0	0	0	0	0	0	0	0	0	0	0	0	0	0	0	0	0	0	0	0	0	0	0	0	0	0	0	1
lib230524_ATTATCCTCTGGAGAG-1	0	0	0	0	0	0	0	0	0	0	0	0	0	0	0	0	0	0	0	0	0	0	0	0	0	0	0	0	0	0	0	0	0	0	0	0	0	0	0	0	0	0	0	0	0	0	0	0	0
lib230524_ATTCACTCACGGGTAA-1	0.0571429	0	0	0	0	0.145985	0	0.112403	0	0	0	0	0	0	0	0.188525	0	0	0	0	0	0.0827586	0	0	0	0	0	0	0	0.168103	0	0	0	0	0	0	0	0	0	0	0	0	0.0571429	0	0.145985	0.112403	0	0	0
lib230524_ATTCAGGCATTCTGTT-1	0	0	0	0	0	0	0	0	0	0	0	0	0	1	0	0	0	0	0	0	0	0	0	0	0	0	0	0	0	0	0	0	0	0	0	0	0	0	0	0	0	0	0	0	0	0	0	0	1
lib230524_ATTCCATTCCGTTTCG-1	0	0.771429	0	0	0	0	0	0	0	0	0	0.110818	0	1	0	0	0	0	0	0	0	0	0	0.108992	0	0	0.12253	0	0	0	0	0	0	0	0	0	0	0	0	0	0	0	0.771429	0	0	0	0	0.110818	1
lib230524_ATTCCCGTCCTAGAGT-1	0	0	0	0	0	0	0	0	0	0	0	0	0	0	0	0	0	0	0	0	0	0.101149	0	0	0	0	0	0	0	0.258621	0	0	0	0	0	0	0	0	0	0	0	0	0	0	0	0	0	0	0
lib230524_ATTGGGTAGCATCGAG-1	0	0	0	0	0	0	0	0	0	0	0	0	0	0	0	0	0	0	0	0	0	0.101149	0	0	0	0	0	0	0	0.258621	0	0	0	0	0	0	0	0	0	0	0	0	0	0	0	0	0	0	0
lib230524_ATTGGGTTCTAATTCC-1	0	0.104762	0	0.109091	0	0	0	0.395349	0	0.27707	0	0	0	0	0	0	0	0	0	0	0	0	0	0	0	0.444444	0	0	0	0.219828	0	0	0	0	0	0	0	0	0	0	0	0	0.104762	0.109091	0	0.395349	0.27707	0	0
lib230524_ATTGTTCCACCGTGCA-1	0	0	0	0	0	0	0	0	0	0	0	0	0	0	0	0	0	0.146953	0	0	0	0	0	0.711172	0	0	0	0	0	0.202586	0	0	0	0	0	0	0	0	0	1	0	0	0	0	0	0	0	0	0
lib230524_CAAAGAAAGGAATGTT-1	0	0	0	0	0	0	0	0	0	0	0	0	0	1	0	0	0	0	0	0	0	0	0	0	0	0	0	0	0	0	0	0	0	0	0	0	0	0	0	0	0	0	0	0	0	0	0	0	1
lib230524_CAACAACCAGGTATGG-1	0	0	0	0	0	0	0.372093	0	0	0	0	0	0	0	0	0	0	0	0	0	0	0	0	0	0	0	0	0	0	0.336207	0	0	0	0	0	0	0	0	0	0	0	0	0	0	0	0.372093	0	0	0
lib230524_CAACAACTCTTCGTAT-1	0	0	0	0	0	0	0	0	0	0	0	0	0	1	0	0	0	0	0	0	0	0	0	0	0	0	0	0	0	0	0	0	0	0	0	0	0	0	0	0	0	0	0	0	0	0	0	0	1
lib230524_CAACCTCTCCCATTCG-1	0	0	0	0	0	0	0	0	0	0	0	0	0	1	0	0	0	0	0	0	0	0	0	0	0	0	0	0	0	0	0	0	0	0	0	0	0	0	0	0	0	0	0	0	0	0	0	0	1
lib230524_CAACGATAGCACACAG-1	0	0	0	0	0	0	0	0	0	0	0	0	0	1	0	0	0	0	0	0	0	0	0	0	0	0	0	0	0	0	0	0	0	0	0	0	0	0	0	0	0	0	0	0	0	0	0	0	1
lib230524_CAACGATAGTAACCTC-1	0	0	0	0	0	0	0	0	0	0	0	0	0	0	0	0	0	0	0	0	0	0.101149	0	0	0	0	0	0	0	0.258621	0	0	0	0	0	0	0	0	0	0	0	0	0	0	0	0	0	0	0
lib230524_CAAGGGAAGGACTAAT-1	0	0.182313	0	0	0	0	0	0	0	0	0	0	0	0	0	0.163934	0	0.232975	0	0	0	0.232184	0	0	0	0	0	0	0	0.224138	0	0	0	0	0	0	0	0	0	0	0	0	0.182313	0	0	0	0	0	0
lib230524_CAATCGAGTAGGACTG-1	0.0598639	0.122449	0	0.167677	0	0.413625	0	0	0	0	0	0.060686	0	0	0	0	0	0.390681	0	0.32197	0	0	0	0	0	0.47619	0	0	0	0.366379	0.141447	0	0	0	0	0.508772	0	0	0	0.585714	0	0	0.182313	0.167677	0.413625	0	0	0.060686	0
lib230524_CAATGACTCATGCGGC-1	0	0	0	0.0868687	0	0	0	0.120155	0	0	0	0	0	0	0	0	0	0.37276	0	0	0	0	0	0	0	0	0.0909091	0	0	0.215517	0	0	0	0	0	0	0	0	0	0	0	0	0	0.0868687	0	0.120155	0	0	0
lib230524_CAATTTCTCTGACAGT-1	0	0	0	0	0	0	0	0	0	0	0	0	0	1	0	0	0	0	0	0	0	0	0	0	0	0	0	0	0	0	0	0	0	0	0	0	0	0	0	0	0	0	0	0	0	0	0	0	1
lib230524_CACATGAGTGTGGTCC-1	0.0571429	0	0	0	0	0.145985	0	0.112403	0	0	0	0	0	0	0	0.188525	0	0	0	0	0	0.0827586	0	0	0	0	0	0	0	0.168103	0	0	0	0	0	0	0	0	0	0	0	0	0.0571429	0	0.145985	0.112403	0	0	0
lib230524_CACCGTTAGGTGCCAA-1	0.0598639	0.122449	0	0.167677	0	0.413625	0	0	0	0	0	0.060686	0	0	0	0	0	0.390681	0	0.32197	0	0	0	0	0	0.47619	0	0	0	0.366379	0.141447	0	0	0	0	0.508772	0	0	0	0.585714	0	0	0.182313	0.167677	0.413625	0	0	0.060686	0
lib230524_CACGAATGTTGGGTAG-1	0.0571429	0	0	0	0	0.145985	0	0.112403	0	0	0	0	0	0	0	0.188525	0	0	0	0	0	0.0827586	0	0	0	0	0	0	0	0.168103	0	0	0	0	0	0	0	0	0	0	0	0	0.0571429	0	0.145985	0.112403	0	0	0
lib230524_CACGAATTCTGCGATA-1	0	0	0	0	0	0	0	0	0	0	0	0	0	1	0	0	0	0	0	0	0	0	0	0	0	0	0	0	0	0	0	0	0	0	0	0	0	0	0	0	0	0	0	0	0	0	0	0	1
lib230524_CACGTGGAGAAATCCA-1	0	0	0	0	0	0	0	0	0	0	0	0	0	0	0	0	0	0.480287	0	0	0	0.0988506	0	0.604905	0	0	0	0	0	0.142241	0	0	0	0	0	0	0	0	0	0	0	0	0	0	0	0	0	0	0
lib230524_CACGTGGCAGGCTCTG-1	0.0571429	0	0	0	0	0.145985	0	0.112403	0	0	0	0	0	0	0	0.188525	0	0	0	0	0	0.0827586	0	0	0	0	0	0	0	0.168103	0	0	0	0	0	0	0	0	0	0	0	0	0.0571429	0	0.145985	0.112403	0	0	0
lib230524_CACGTGGTCTGTCGCT-1	0	0	0	0	0	0	0	0	0	0	0	0	0	0	0	0	0	0	0	0	0	0	0	0	0	0	0	0	0	0	0	0	0	0	0	0	0	0	0	0	0	0	0	0	0	0	0	0	0
lib230524_CACGTTCAGCCAAGTG-1	0	0	0	0	0	0	0	0	0	0	0	0	0	0	0	0	0	0	0	0	0	0	0	0	0	0	0	0	0	0	0	0	0	0	0	0	0	0	0	0	0	0	0	0	0	0	0	0	0
lib230524_CACTGGGGTCCACTTC-1	0	0	0	0	0	0	0	0	0	0	0	0	0	0	0	0	0	0	0	0	0	0	0	0	0	0	0	0	0	0	0	0	0	0	0	0	0	0	0	0	0	0	0	0	0	0	0	0	0
lib230524_CACTTCGAGCCGCACT-1	0	0	0	0	0	0	0.372093	0	0	0	0	0	0	0	0	0	0	0	0	0	0	0	0	0	0	0	0	0	0	0.336207	0	0	0	0	0	0	0	0	0	0	0	0	0	0	0	0.372093	0	0	0
lib230524_CAGAGCCCAGTCCCGA-1	0	0	0	0	0	0	0	0	0	0	0	0	0	0	0	0	0	0.146953	0	0	0	0	0	0.711172	0	0	0	0	0	0.202586	0	0	0	0	0	0	0	0	0	1	0	0	0	0	0	0	0	0	0
lib230524_CAGAGCCTCGAACACT-1	0	0	0	0	0	0	0	0	0	0	0	0	0	1	0	0	0	0	0	0	0	0	0	0	0	0	0	0	0	0	0	0	0	0	0	0	0	0	0	0	0	0	0	0	0	0	0	0	1
lib230524_CAGATTGCACTGTCCT-1	0.0653061	0	0	0	0	0.124088	0	0.205426	0	0	0	0	0	0.884058	0	0.254098	0	0.444444	0	0.219697	0	0.114943	0	0	0	0	0.0988142	0	0	0	0	0	0.103529	0	0	0	0	0	0	0	0	0	0.0653061	0	0.124088	0.205426	0	0	0.884058
lib230524_CAGATTGTCACCTCAC-1	0	0	0	0	0	0	0	0	0	0	0	0	0	0	0	0	0	0.146953	0	0	0	0	0	0.711172	0	0	0	0	0	0.202586	0	0	0	0	0	0	0	0	0	1	0	0	0	0	0	0	0	0	0
lib230524_CAGCAATAGATTGATG-1	0	0	0	0.0868687	0	0	0	0.120155	0	0	0	0	0	0	0	0	0	0.37276	0	0	0	0	0	0	0	0	0.0909091	0	0	0.215517	0	0	0	0	0	0	0	0	0	0	0	0	0	0.0868687	0	0.120155	0	0	0
lib230524_CAGCCAGCATGACTGT-1	0	0	0	0.0868687	0	0	0	0.120155	0	0	0	0	0	0	0	0	0	0.37276	0	0	0	0	0	0	0	0	0.0909091	0	0	0.215517	0	0	0	0	0	0	0	0	0	0	0	0	0	0.0868687	0	0.120155	0	0	0
lib230524_CAGCGTGCATACGCAT-1	0	0	0	0.0868687	0	0	0	0.120155	0	0	0	0	0	0	0	0	0	0.37276	0	0	0	0	0	0	0	0	0.0909091	0	0	0.215517	0	0	0	0	0	0	0	0	0	0	0	0	0	0.0868687	0	0.120155	0	0	0
lib230524_CAGGCCATCCTATTTG-1	0	0.182313	0	0	0	0	0	0	0	0	0	0	0	0	0	0.163934	0	0.232975	0	0	0	0.232184	0	0	0	0	0	0	0	0.224138	0	0	0	0	0	0	0	0	0	0	0	0	0.182313	0	0	0	0	0	0
lib230524_CAGGGCTAGGACTAAT-1	0	0	0	0	0	0	0	0	0	0	0	0	0	0	0	0	0	0.146953	0	0	0	0	0	0.711172	0	0	0	0	0	0.202586	0	0	0	0	0	0	0	0	0	1	0	0	0	0	0	0	0	0	0
lib230524_CAGGGCTCACAGCCAC-1	0.0571429	0	0	0	0	0.145985	0	0.112403	0	0	0	0	0	0	0	0.188525	0	0	0	0	0	0.0827586	0	0	0	0	0	0	0	0.168103	0	0	0	0	0	0	0	0	0	0	0	0	0.0571429	0	0.145985	0.112403	0	0	0
lib230524_CAGTGCGTCAGTGGGA-1	0	0	0	0	0	0	0	0	0	0	0	0	0	1	0	0	0	0	0	0	0	0	0	0	0	0	0	0	0	0	0	0	0	0	0	0	0	0	0	0	0	0	0	0	0	0	0	0	1
lib230524_CATAAGCAGGTTGGAC-1	0	0	0	0.0868687	0	0	0	0.120155	0	0	0	0	0	0	0	0	0	0.37276	0	0	0	0	0	0	0	0	0.0909091	0	0	0.215517	0	0	0	0	0	0	0	0	0	0	0	0	0	0.0868687	0	0.120155	0	0	0
lib230524_CATACAGCACCCAATA-1	0	0	0	0	0	0	0.372093	0	0	0	0	0	0	0	0	0	0	0	0	0	0	0	0	0	0	0	0	0	0	0.336207	0	0	0	0	0	0	0	0	0	0	0	0	0	0	0	0.372093	0	0	0
lib230524_CATACCCGTCATCGGC-1	0	0	0	0	0	0	0	0	0	0	0	0	0	0	0	0	0	0.146953	0	0	0	0	0	0.711172	0	0	0	0	0	0.202586	0	0	0	0	0	0	0	0	0	1	0	0	0	0	0	0	0	0	0
lib230524_CATACCCTCTCCGAGG-1	0	0	0	0	0	0	0	0	0	0	0	0	0	0	0	0	0	0	0	0	0	0.101149	0	0	0	0	0	0	0	0.258621	0	0	0	0	0	0	0	0	0	0	0	0	0	0	0	0	0	0	0
lib230524_CATAGACGTCCCACGA-1	0	0.167347	0	0	0	0	0	0.162791	0	0	0	0	0	0	0	0.188525	0	0.129032	0	0	0	0	0	0	0	0	0	0	0	0	0	0	0	0.251765	0	0	0	0	0	0	0	0	0.167347	0	0	0.162791	0	0	0
lib230524_CATCAAGCAACCAGAG-1	0.0571429	0	0	0	0	0.145985	0	0.112403	0	0	0	0	0	0	0	0.188525	0	0	0	0	0	0.0827586	0	0	0	0	0	0	0	0.168103	0	0	0	0	0	0	0	0	0	0	0	0	0.0571429	0	0.145985	0.112403	0	0	0
lib230524_CATCAAGCATGTGGTT-1	0	0.182313	0	0	0	0	0	0	0	0	0	0	0	0	0	0.163934	0	0.232975	0	0	0	0.232184	0	0	0	0	0	0	0	0.224138	0	0	0	0	0	0	0	0	0	0	0	0	0.182313	0	0	0	0	0	0
lib230524_CATCCACCATCATCTT-1	0	0.771429	0	0	0	0	0	0	0	0	0	0.110818	0	1	0	0	0	0	0	0	0	0	0	0.108992	0	0	0.12253	0	0	0	0	0	0	0	0	0	0	0	0	0	0	0	0.771429	0	0	0	0	0.110818	1
lib230524_CATCCACGTGAGGATC-1	0	0	0	0	0	0	0	0	0	0	0	0	0	0	0	0	0	0.146953	0	0	0	0	0	0.711172	0	0	0	0	0	0.202586	0	0	0	0	0	0	0	0	0	1	0	0	0	0	0	0	0	0	0
lib230524_CATCCACTCCTTGGAA-1	0	0	0	0	0	0	0	0	0	0	0	0	0	0	0	0	0	0	0	0	0	0	0	0	0	0	0	0	0	0	0	0	0	0	0	0	0	0	0	0	0	0	0	0	0	0	0	0	0
lib230524_CATCCGTGTCGTACAT-1	0	0	0	0	0	0	0	0	0	0	0	0	0	0	0	0	0	0	0	0	0	0	0	0	0	0	0	0	0	0	0	0	0	0	0	0	0	0	0	0	0	0	0	0	0	0	0	0	0
lib230524_CATCCGTTCTCGGTCT-1	0.0598639	0.122449	0	0.167677	0	0.413625	0	0	0	0	0	0.060686	0	0	0	0	0	0.390681	0	0.32197	0	0	0	0	0	0.47619	0	0	0	0.366379	0.141447	0	0	0	0	0.508772	0	0	0	0.585714	0	0	0.182313	0.167677	0.413625	0	0	0.060686	0
lib230524_CATCGCTTCATTTGTC-1	0	0	0	0	0	0	0	0	0	0	0	0	0	1	0	0	0	0	0	0	0	0	0	0	0	0	0	0	0	0	0	0	0	0	0	0	0	0	0	0	0	0	0	0	0	0	0	0	1
lib230524_CATCGTCGTCTGGTTA-1	0	0	0	0	0	0	0	0	0	0	0	0	0	0	0	0	0	0	0	0	0	0	0	0	0	0	0	0	0	0	0	0	0	0	0	0	0	0	0	0	0	0	0	0	0	0	0	0	0
lib230524_CATCGTCTCTGATTCT-1	0	0	0	0	0	0	0	0	0	0	0	0	0	0	0	0	0	0.480287	0	0	0	0.0988506	0	0.604905	0	0	0	0	0	0.142241	0	0	0	0	0	0	0	0	0	0	0	0	0	0	0	0	0	0	0
lib230524_CATGCGGAGAGCAGTC-1	0	0.167347	0	0	0	0	0	0.162791	0	0	0	0	0	0	0	0.188525	0	0.129032	0	0	0	0	0	0	0	0	0	0	0	0	0	0	0	0.251765	0	0	0	0	0	0	0	0	0.167347	0	0	0.162791	0	0	0
lib230524_CATGCTCCACAACGAG-1	0	0	0	0	0	0	0	0	0	0	0	0	0	0	0	0	0	0	0	0	0	0	0	0	0	0	0	0	0	0	0	0	0	0	0	0	0	0	0	0	0	0	0	0	0	0	0	0	0
lib230524_CATGCTCCAGGTTTAC-1	0	0.182313	0	0	0	0	0	0	0	0	0	0	0	0	0	0.163934	0	0.232975	0	0	0	0.232184	0	0	0	0	0	0	0	0.224138	0	0	0	0	0	0	0	0	0	0	0	0	0.182313	0	0	0	0	0	0
lib230524_CATGCTCCATGCACTA-1	0	0	0	0.0868687	0	0	0	0.120155	0	0	0	0	0	0	0	0	0	0.37276	0	0	0	0	0	0	0	0	0.0909091	0	0	0.215517	0	0	0	0	0	0	0	0	0	0	0	0	0	0.0868687	0	0.120155	0	0	0
lib230524_CATTCATCATGACTTG-1	0	0	0	0	0	0	0	0	0	0	0	0	0	0	0	0	0	0.480287	0	0	0	0.0988506	0	0.604905	0	0	0	0	0	0.142241	0	0	0	0	0	0	0	0	0	0	0	0	0	0	0	0	0	0	0
lib230524_CATTCATTCACCGGGT-1	0.0653061	0	0	0	0	0.124088	0	0.205426	0	0	0	0	0	0.884058	0	0.254098	0	0.444444	0	0.219697	0	0.114943	0	0	0	0	0.0988142	0	0	0	0	0	0.103529	0	0	0	0	0	0	0	0	0	0.0653061	0	0.124088	0.205426	0	0	0.884058
lib230524_CATTCCGAGCGCCCAT-1	0.0571429	0	0	0	0	0.145985	0	0.112403	0	0	0	0	0	0	0	0.188525	0	0	0	0	0	0.0827586	0	0	0	0	0	0	0	0.168103	0	0	0	0	0	0	0	0	0	0	0	0	0.0571429	0	0.145985	0.112403	0	0	0
lib230524_CATTCCGCAATTTCTC-1	0	0.182313	0	0	0	0	0	0	0	0	0	0	0	0	0	0.163934	0	0.232975	0	0	0	0.232184	0	0	0	0	0	0	0	0.224138	0	0	0	0	0	0	0	0	0	0	0	0	0.182313	0	0	0	0	0	0
lib230524_CATTCCGTCGCAGTTA-1	0	0	0	0	0	0	0	0	0	0	0	0	0	0	0	0	0	0	0	0	0	0.101149	0	0	0	0	0	0	0	0.258621	0	0	0	0	0	0	0	0	0	0	0	0	0	0	0	0	0	0	0
lib230524_CATTGAGCAATTCTCT-1	0.0653061	0	0	0	0	0.124088	0	0.205426	0	0	0	0	0	0.884058	0	0.254098	0	0.444444	0	0.219697	0	0.114943	0	0	0	0	0.0988142	0	0	0	0	0	0.103529	0	0	0	0	0	0	0	0	0	0.0653061	0	0.124088	0.205426	0	0	0.884058
lib230524_CATTGAGGTCCAGCAC-1	0	0	0	0	0	0	0.372093	0	0	0	0	0	0	0	0	0	0	0	0	0	0	0	0	0	0	0	0	0	0	0.336207	0	0	0	0	0	0	0	0	0	0	0	0	0	0	0	0.372093	0	0	0
lib230524_CATTGAGTCATTGCCC-1	0.0598639	0.122449	0	0.167677	0	0.413625	0	0	0	0	0	0.060686	0	0	0	0	0	0.390681	0	0.32197	0	0	0	0	0	0.47619	0	0	0	0.366379	0.141447	0	0	0	0	0.508772	0	0	0	0.585714	0	0	0.182313	0.167677	0.413625	0	0	0.060686	0
lib230524_CATTGCCAGACTGGGT-1	0	0	0	0	0	0	0	0	0	0	0	0	0	0	0	0	0	0	0	0	0	0	0	0	0	0	0	0	0	0	0	0	0	0	0	0	0	0	0	0	0	0	0	0	0	0	0	0	0
lib230524_CATTGCCTCTAGACCA-1	0	0	0	0	0	0	0	0	0	0	0	0	0	0	0	0	0	0.480287	0	0	0	0.0988506	0	0.604905	0	0	0	0	0	0.142241	0	0	0	0	0	0	0	0	0	0	0	0	0	0	0	0	0	0	0
lib230524_CATTTCACACTGGCGT-1	0	0	0	0	0	0	0.372093	0	0	0	0	0	0	0	0	0	0	0	0	0	0	0	0	0	0	0	0	0	0	0.336207	0	0	0	0	0	0	0	0	0	0	0	0	0	0	0	0.372093	0	0	0
lib230524_CCAATTTTCAGCCCAG-1	0	0.771429	0	0	0	0	0	0	0	0	0	0.110818	0	1	0	0	0	0	0	0	0	0	0	0.108992	0	0	0.12253	0	0	0	0	0	0	0	0	0	0	0	0	0	0	0	0.771429	0	0	0	0	0.110818	1
lib230524_CCAATTTTCAGTGTTG-1	0	0	0	0	0	0	0	0	0	0	0	0	0	0	0	0	0	0	0	0	0	0.101149	0	0	0	0	0	0	0	0.258621	0	0	0	0	0	0	0	0	0	0	0	0	0	0	0	0	0	0	0
lib230524_CCACAAATCTAGTTCT-1	0	0	0	0	0	0	0	0	0	0	0	0	0	0	0	0	0	0.146953	0	0	0	0	0	0.711172	0	0	0	0	0	0.202586	0	0	0	0	0	0	0	0	0	1	0	0	0	0	0	0	0	0	0
lib230524_CCACCATTCCACTGGG-1	0	0	0	0	0	0	0	0	0	0	0	0	0	0	0	0	0	0	0	0	0	0.101149	0	0	0	0	0	0	0	0.258621	0	0	0	0	0	0	0	0	0	0	0	0	0	0	0	0	0	0	0
lib230524_CCACGTTGTCGCGGTT-1	0.0653061	0	0	0	0	0.124088	0	0.205426	0	0	0	0	0	0.884058	0	0.254098	0	0.444444	0	0.219697	0	0.114943	0	0	0	0	0.0988142	0	0	0	0	0	0.103529	0	0	0	0	0	0	0	0	0	0.0653061	0	0.124088	0.205426	0	0	0.884058
lib230524_CCACGTTGTGCACAAG-1	0.0571429	0	0	0	0	0.145985	0	0.112403	0	0	0	0	0	0	0	0.188525	0	0	0	0	0	0.0827586	0	0	0	0	0	0	0	0.168103	0	0	0	0	0	0	0	0	0	0	0	0	0.0571429	0	0.145985	0.112403	0	0	0
lib230524_CCACTTGAGTATCCTG-1	0	0	0	0	0	0	0	0	0	0	0	0	0	1	0	0	0	0	0	0	0	0	0	0	0	0	0	0	0	0	0	0	0	0	0	0	0	0	0	0	0	0	0	0	0	0	0	0	1
lib230524_CCATAAGCATTCAGCA-1	0	0	0	0	0	0	0	0	0	0	0	0	0	0	0	0	0	0	0	0	0	0	0	0	0	0	0	0	0	0	0	0	0	0	0	0	0	0	0	0	0	0	0	0	0	0	0	0	0
lib230524_CCATCACGTCTGTGAT-1	0	0	0	0	0	0	0	0	0	0	0	0	0	0	0	0	0	0.480287	0	0	0	0.0988506	0	0.604905	0	0	0	0	0	0.142241	0	0	0	0	0	0	0	0	0	0	0	0	0	0	0	0	0	0	0
lib230524_CCCATTGAGTGCCAGA-1	0	0	0	0	0	0	0	0	0	0	0	0	0	0	0	0	0	0.146953	0	0	0	0	0	0.711172	0	0	0	0	0	0.202586	0	0	0	0	0	0	0	0	0	1	0	0	0	0	0	0	0	0	0
lib230524_CCCGAAGAGTCACTAC-1	0	0	0	0	0	0	0	0	0	0	0	0	0	0	0	0	0	0.480287	0	0	0	0.0988506	0	0.604905	0	0	0	0	0	0.142241	0	0	0	0	0	0	0	0	0	0	0	0	0	0	0	0	0	0	0
lib230524_CCCGAAGCATAACTCG-1	0	0	0	0	0	0	0	0	0	0	0	0	0	1	0	0	0	0	0	0	0	0	0	0	0	0	0	0	0	0	0	0	0	0	0	0	0	0	0	0	0	0	0	0	0	0	0	0	1
lib230524_CCCGAAGTCATCAGTG-1	0	0.771429	0	0	0	0	0	0	0	0	0	0.110818	0	1	0	0	0	0	0	0	0	0	0	0.108992	0	0	0.12253	0	0	0	0	0	0	0	0	0	0	0	0	0	0	0	0.771429	0	0	0	0	0.110818	1
lib230524_CCCGGAAGTCATTGCA-1	0	0	0	0	0	0	0.372093	0	0	0	0	0	0	0	0	0	0	0	0	0	0	0	0	0	0	0	0	0	0	0.336207	0	0	0	0	0	0	0	0	0	0	0	0	0	0	0	0.372093	0	0	0
lib230524_CCCTAACGTGCTCTTC-1	0.0598639	0.122449	0	0.167677	0	0.413625	0	0	0	0	0	0.060686	0	0	0	0	0	0.390681	0	0.32197	0	0	0	0	0	0.47619	0	0	0	0.366379	0.141447	0	0	0	0	0.508772	0	0	0	0.585714	0	0	0.182313	0.167677	0.413625	0	0	0.060686	0
lib230524_CCCTAACGTTTGGCTA-1	0	0	0	0.0868687	0	0	0	0.120155	0	0	0	0	0	0	0	0	0	0.37276	0	0	0	0	0	0	0	0	0.0909091	0	0	0.215517	0	0	0	0	0	0	0	0	0	0	0	0	0	0.0868687	0	0.120155	0	0	0
lib230524_CCCTCTCAGCAGTACG-1	0	0	0	0.0868687	0	0	0	0.120155	0	0	0	0	0	0	0	0	0	0.37276	0	0	0	0	0	0	0	0	0.0909091	0	0	0.215517	0	0	0	0	0	0	0	0	0	0	0	0	0	0.0868687	0	0.120155	0	0	0
lib230524_CCCTCTCAGCATCGAG-1	0	0	0	0	0	0	0.372093	0	0	0	0	0	0	0	0	0	0	0	0	0	0	0	0	0	0	0	0	0	0	0.336207	0	0	0	0	0	0	0	0	0	0	0	0	0	0	0	0.372093	0	0	0
lib230524_CCCTCTCAGCCGTTAT-1	0	0	0	0	0	0	0	0	0	0	0	0	0	0	0	0	0	0.480287	0	0	0	0.0988506	0	0.604905	0	0	0	0	0	0.142241	0	0	0	0	0	0	0	0	0	0	0	0	0	0	0	0	0	0	0
lib230524_CCCTCTCCAAGTTTGC-1	0	0	0	0	0	0	0	0	0	0	0	0	0	0	0	0	0	0.146953	0	0	0	0	0	0.711172	0	0	0	0	0	0.202586	0	0	0	0	0	0	0	0	0	1	0	0	0	0	0	0	0	0	0
lib230524_CCCTCTCGTACGCGTC-1	0	0	0	0	0	0	0	0	0	0	0	0	0	0	0	0	0	0.146953	0	0	0	0	0	0.711172	0	0	0	0	0	0.202586	0	0	0	0	0	0	0	0	0	1	0	0	0	0	0	0	0	0	0
lib230524_CCCTCTCTCGAGATAA-1	0	0	0	0	0	0	0	0	0	0	0	0	0	0	0	0	0	0	0	0	0	0	0	0	0	0	0	0	0	0	0	0	0	0	0	0	0	0	0	0	0	0	0	0	0	0	0	0	0
lib230524_CCCTGATAGACAGCGT-1	0	0	0	0	0	0	0	0	0	0	0	0	0	0	0	0	0	0.146953	0	0	0	0	0	0.711172	0	0	0	0	0	0.202586	0	0	0	0	0	0	0	0	0	1	0	0	0	0	0	0	0	0	0
lib230524_CCCTGATCAACAGATA-1	0.0571429	0	0	0	0	0.145985	0	0.112403	0	0	0	0	0	0	0	0.188525	0	0	0	0	0	0.0827586	0	0	0	0	0	0	0	0.168103	0	0	0	0	0	0	0	0	0	0	0	0	0.0571429	0	0.145985	0.112403	0	0	0
lib230524_CCCTGATCATACCACA-1	0	0	0	0	0	0	0	0	0	0	0	0	0	0	0	0	0	0	0	0	0	0	0	0	0	0	0	0	0	0	0	0	0	0	0	0	0	0	0	0	0	0	0	0	0	0	0	0	0
lib230524_CCGATGGCAAATCAGA-1	0	0	0	0	0	0	0	0	0	0	0	0	0	0	0	0	0	0.146953	0	0	0	0	0	0.711172	0	0	0	0	0	0.202586	0	0	0	0	0	0	0	0	0	1	0	0	0	0	0	0	0	0	0
lib230524_CCGATGGTCCGATAGT-1	0	0	0	0	0	0	0.372093	0	0	0	0	0	0	0	0	0	0	0	0	0	0	0	0	0	0	0	0	0	0	0.336207	0	0	0	0	0	0	0	0	0	0	0	0	0	0	0	0.372093	0	0	0
lib230524_CCGCAAGGTATGCTAC-1	0	0	0	0.0868687	0	0	0	0.120155	0	0	0	0	0	0	0	0	0	0.37276	0	0	0	0	0	0	0	0	0.0909091	0	0	0.215517	0	0	0	0	0	0	0	0	0	0	0	0	0	0.0868687	0	0.120155	0	0	0
lib230524_CCGGTAGTCTGGAGAG-1	0	0	0	0	0	0	0	0	0	0	0	0	0	0	0	0	0	0.480287	0	0	0	0.0988506	0	0.604905	0	0	0	0	0	0.142241	0	0	0	0	0	0	0	0	0	0	0	0	0	0	0	0	0	0	0
lib230524_CCGTAGGCAGAGAGGG-1	0	0	0	0	0	0	0	0	0	0	0	0	0	1	0	0	0	0	0	0	0	0	0	0	0	0	0	0	0	0	0	0	0	0	0	0	0	0	0	0	0	0	0	0	0	0	0	0	1
lib230524_CCGTTCAGTAGACAGC-1	0	0	0	0	0	0	0	0	0	0	0	0	0	0	0	0	0	0.146953	0	0	0	0	0	0.711172	0	0	0	0	0	0.202586	0	0	0	0	0	0	0	0	0	1	0	0	0	0	0	0	0	0	0
lib230524_CCTAACCGTGAATAAC-1	0.0571429	0	0	0	0	0.145985	0	0.112403	0	0	0	0	0	0	0	0.188525	0	0	0	0	0	0.0827586	0	0	0	0	0	0	0	0.168103	0	0	0	0	0	0	0	0	0	0	0	0	0.0571429	0	0.145985	0.112403	0	0	0
lib230524_CCTAAGACAGAGTCTT-1	0.0653061	0	0	0	0	0.124088	0	0.205426	0	0	0	0	0	0.884058	0	0.254098	0	0.444444	0	0.219697	0	0.114943	0	0	0	0	0.0988142	0	0	0	0	0	0.103529	0	0	0	0	0	0	0	0	0	0.0653061	0	0.124088	0.205426	0	0	0.884058
lib230524_CCTACGTTCGCCTATC-1	0	0	0	0	0	0	0	0	0	0	0	0	0	0	0	0	0	0.146953	0	0	0	0	0	0.711172	0	0	0	0	0	0.202586	0	0	0	0	0	0	0	0	0	1	0	0	0	0	0	0	0	0	0
lib230524_CCTATCGCACTGAGGA-1	0	0	0	0	0	0	0	0	0	0	0	0	0	1	0	0	0	0	0	0	0	0	0	0	0	0	0	0	0	0	0	0	0	0	0	0	0	0	0	0	0	0	0	0	0	0	0	0	1
lib230524_CCTATCGCAGGTGAGT-1	0	0	0	0	0	0	0	0	0	0	0	0	0	0	0	0	0	0	0	0	0	0	0	0	0	0	0	0	0	0	0	0	0	0	0	0	0	0	0	0	0	0	0	0	0	0	0	0	0
lib230524_CCTCAACAGCTCAGAG-1	0	0	0	0	0	0	0	0	0	0	0	0	0	0	0	0	0	0.146953	0	0	0	0	0	0.711172	0	0	0	0	0	0.202586	0	0	0	0	0	0	0	0	0	1	0	0	0	0	0	0	0	0	0
lib230524_CCTCCAAGTGCCCAGT-1	0	0	0	0	0	0	0	0	0	0	0	0	0	0	0	0	0	0.146953	0	0	0	0	0	0.711172	0	0	0	0	0	0.202586	0	0	0	0	0	0	0	0	0	1	0	0	0	0	0	0	0	0	0
lib230524_CCTCCAATCTGTAACG-1	0	0	0	0	0	0	0	0	0	0	0	0	0	0	0	0	0	0.480287	0	0	0	0.0988506	0	0.604905	0	0	0	0	0	0.142241	0	0	0	0	0	0	0	0	0	0	0	0	0	0	0	0	0	0	0
lib230524_CCTCCTCCAAATGATG-1	0.0598639	0.122449	0	0.167677	0	0.413625	0	0	0	0	0	0.060686	0	0	0	0	0	0.390681	0	0.32197	0	0	0	0	0	0.47619	0	0	0	0.366379	0.141447	0	0	0	0	0.508772	0	0	0	0.585714	0	0	0.182313	0.167677	0.413625	0	0	0.060686	0
lib230524_CCTCTCCGTCCTATAG-1	0.0598639	0.122449	0	0.167677	0	0.413625	0	0	0	0	0	0.060686	0	0	0	0	0	0.390681	0	0.32197	0	0	0	0	0	0.47619	0	0	0	0.366379	0.141447	0	0	0	0	0.508772	0	0	0	0.585714	0	0	0.182313	0.167677	0.413625	0	0	0.060686	0
lib230524_CCTGCATCAAGTCATC-1	0	0	0	0	0	0	0.372093	0	0	0	0	0	0	0	0	0	0	0	0	0	0	0	0	0	0	0	0	0	0	0.336207	0	0	0	0	0	0	0	0	0	0	0	0	0	0	0	0.372093	0	0	0
lib230524_CCTGCATCACACTGGC-1	0.0653061	0	0	0	0	0.124088	0	0.205426	0	0	0	0	0	0.884058	0	0.254098	0	0.444444	0	0.219697	0	0.114943	0	0	0	0	0.0988142	0	0	0	0	0	0.103529	0	0	0	0	0	0	0	0	0	0.0653061	0	0.124088	0.205426	0	0	0.884058
lib230524_CCTGTTGCATGTGACT-1	0	0	0	0	0	0	0	0	0	0	0	0	0	0	0	0	0	0.146953	0	0	0	0	0	0.711172	0	0	0	0	0	0.202586	0	0	0	0	0	0	0	0	0	1	0	0	0	0	0	0	0	0	0
lib230524_CCTTGTGCATTGTAGC-1	0	0	0	0	0	0	0	0	0	0	0	0	0	0	0	0	0	0	0	0	0	0.101149	0	0	0	0	0	0	0	0.258621	0	0	0	0	0	0	0	0	0	0	0	0	0	0	0	0	0	0	0
lib230524_CCTTGTGGTGTGAGCA-1	0	0.182313	0	0	0	0	0	0	0	0	0	0	0	0	0	0.163934	0	0.232975	0	0	0	0.232184	0	0	0	0	0	0	0	0.224138	0	0	0	0	0	0	0	0	0	0	0	0	0.182313	0	0	0	0	0	0
lib230524_CGAAGGAAGCTAATGA-1	0	0	0	0	0	0	0	0	0	0	0	0	0	1	0	0	0	0	0	0	0	0	0	0	0	0	0	0	0	0	0	0	0	0	0	0	0	0	0	0	0	0	0	0	0	0	0	0	1
lib230524_CGAAGGAAGGCTGGAT-1	0	0	0	0	0	0	0	0	0	0	0	0	0	0	0	0	0	0	0	0	0	0	0	0	0	0	0	0	0	0	0	0	0	0	0	0	0	0	0	0	0	0	0	0	0	0	0	0	0
lib230524_CGAAGGATCCCTGGTT-1	0.0653061	0	0	0	0	0.124088	0	0.205426	0	0	0	0	0	0.884058	0	0.254098	0	0.444444	0	0.219697	0	0.114943	0	0	0	0	0.0988142	0	0	0	0	0	0.103529	0	0	0	0	0	0	0	0	0	0.0653061	0	0.124088	0.205426	0	0	0.884058
lib230524_CGAAGTTCATTCGATG-1	0	0	0	0	0	0	0	0	0	0	0	0	0	0	0	0	0	0.146953	0	0	0	0	0	0.711172	0	0	0	0	0	0.202586	0	0	0	0	0	0	0	0	0	1	0	0	0	0	0	0	0	0	0
lib230524_CGAGAAGGTTTATGCG-1	0	0	0	0	0	0	0	0	0	0	0	0	0	0	0	0	0	0	0	0	0	0	0	0	0	0	0	0	0	0	0	0	0	0	0	0	0	0	0	0	0	0	0	0	0	0	0	0	0
lib230524_CGAGTTACATCAACCA-1	0.0571429	0	0	0	0	0.145985	0	0.112403	0	0	0	0	0	0	0	0.188525	0	0	0	0	0	0.0827586	0	0	0	0	0	0	0	0.168103	0	0	0	0	0	0	0	0	0	0	0	0	0.0571429	0	0.145985	0.112403	0	0	0
lib230524_CGAGTTACATGTGGTT-1	0	0	0	0	0	0	0	0	0	0	0	0	0	0	0	0	0	0	0	0	0	0	0	0	0	0	0	0	0	0	0	0	0	0	0	0	0	0	0	0	0	0	0	0	0	0	0	0	0
lib230524_CGAGTTAGTCGGTGAA-1	0	0	0	0	0	0	0	0	0	0	0	0	0	1	0	0	0	0	0	0	0	0	0	0	0	0	0	0	0	0	0	0	0	0	0	0	0	0	0	0	0	0	0	0	0	0	0	0	1
lib230524_CGATCGGAGCACCGTC-1	0	0	0	0	0	0	0	0	0	0	0	0	0	0	0	0	0	0	0	0	0	0	0	0	0	0	0	0	0	0	0	0	0	0	0	0	0	0	0	0	0	0	0	0	0	0	0	0	0
lib230524_CGATCGGCAGCTTTGA-1	0	0	0	0.0868687	0	0	0	0.120155	0	0	0	0	0	0	0	0	0	0.37276	0	0	0	0	0	0	0	0	0.0909091	0	0	0.215517	0	0	0	0	0	0	0	0	0	0	0	0	0	0.0868687	0	0.120155	0	0	0
lib230524_CGATCGGGTAGGCTGA-1	0	0	0	0	0	0	0	0	0	0	0	0	0	1	0	0	0	0	0	0	0	0	0	0	0	0	0	0	0	0	0	0	0	0	0	0	0	0	0	0	0	0	0	0	0	0	0	0	1
lib230524_CGCAGGTAGACGGAAA-1	0	0	0	0	0	0	0	0	0	0	0	0	0	0	0	0	0	0	0	0	0	0	0	0	0	0	0	0	0	0	0	0	0	0	0	0	0	0	0	0	0	0	0	0	0	0	0	0	0
lib230524_CGCATAAAGTGTTCCA-1	0	0	0	0	0	0	0	0	0	0	0	0	0	0	0	0	0	0.146953	0	0	0	0	0	0.711172	0	0	0	0	0	0.202586	0	0	0	0	0	0	0	0	0	1	0	0	0	0	0	0	0	0	0
lib230524_CGCCAGACATGAGGGT-1	0	0	0	0	0	0	0	0	0	0	0	0	0	0	0	0	0	0	0	0	0	0.101149	0	0	0	0	0	0	0	0.258621	0	0	0	0	0	0	0	0	0	0	0	0	0	0	0	0	0	0	0
lib230524_CGCCAGATCACTCTTA-1	0.0653061	0	0	0	0	0.124088	0	0.205426	0	0	0	0	0	0.884058	0	0.254098	0	0.444444	0	0.219697	0	0.114943	0	0	0	0	0.0988142	0	0	0	0	0	0.103529	0	0	0	0	0	0	0	0	0	0.0653061	0	0.124088	0.205426	0	0	0.884058
lib230524_CGGAATTCAAACGGCA-1	0	0	0	0.0868687	0	0	0	0.120155	0	0	0	0	0	0	0	0	0	0.37276	0	0	0	0	0	0	0	0	0.0909091	0	0	0.215517	0	0	0	0	0	0	0	0	0	0	0	0	0	0.0868687	0	0.120155	0	0	0
lib230524_CGGACACAGGTATCTC-1	0.0653061	0	0	0	0	0.124088	0	0.205426	0	0	0	0	0	0.884058	0	0.254098	0	0.444444	0	0.219697	0	0.114943	0	0	0	0	0.0988142	0	0	0	0	0	0.103529	0	0	0	0	0	0	0	0	0	0.0653061	0	0.124088	0.205426	0	0	0.884058
lib230524_CGGCAGTTCCCAAGCG-1	0.0598639	0.122449	0	0.167677	0	0.413625	0	0	0	0	0	0.060686	0	0	0	0	0	0.390681	0	0.32197	0	0	0	0	0	0.47619	0	0	0	0.366379	0.141447	0	0	0	0	0.508772	0	0	0	0.585714	0	0	0.182313	0.167677	0.413625	0	0	0.060686	0
lib230524_CGGGCATAGCCTTTGA-1	0	0	0	0	0	0	0	0	0	0	0	0	0	0	0	0	0	0	0	0	0	0.101149	0	0	0	0	0	0	0	0.258621	0	0	0	0	0	0	0	0	0	0	0	0	0	0	0	0	0	0	0
lib230524_CGGGCATCACTAGAGG-1	0	0	0	0	0	0	0.372093	0	0	0	0	0	0	0	0	0	0	0	0	0	0	0	0	0	0	0	0	0	0	0.336207	0	0	0	0	0	0	0	0	0	0	0	0	0	0	0	0.372093	0	0	0
lib230524_CGGGCATGTAGTGCGA-1	0	0	0	0.0868687	0	0	0	0.120155	0	0	0	0	0	0	0	0	0	0.37276	0	0	0	0	0	0	0	0	0.0909091	0	0	0.215517	0	0	0	0	0	0	0	0	0	0	0	0	0	0.0868687	0	0.120155	0	0	0
lib230524_CGGGCATTCTGGTCAA-1	0	0	0	0.0868687	0	0	0	0.120155	0	0	0	0	0	0	0	0	0	0.37276	0	0	0	0	0	0	0	0	0.0909091	0	0	0.215517	0	0	0	0	0	0	0	0	0	0	0	0	0	0.0868687	0	0.120155	0	0	0
lib230524_CGTAATGCAATAGTGA-1	0	0.182313	0	0	0	0	0	0	0	0	0	0	0	0	0	0.163934	0	0.232975	0	0	0	0.232184	0	0	0	0	0	0	0	0.224138	0	0	0	0	0	0	0	0	0	0	0	0	0.182313	0	0	0	0	0	0
lib230524_CGTAATGTCTAACACG-1	0	0.182313	0	0	0	0	0	0	0	0	0	0	0	0	0	0.163934	0	0.232975	0	0	0	0.232184	0	0	0	0	0	0	0	0.224138	0	0	0	0	0	0	0	0	0	0	0	0	0.182313	0	0	0	0	0	0
lib230524_CGTAATGTCTTGTGCC-1	0	0	0	0	0	0	0.372093	0	0	0	0	0	0	0	0	0	0	0	0	0	0	0	0	0	0	0	0	0	0	0.336207	0	0	0	0	0	0	0	0	0	0	0	0	0	0	0	0.372093	0	0	0
lib230524_CGTAGTATCAATCTTC-1	0	0	0	0	0	0	0	0	0	0	0	0	0	0	0	0	0	0	0	0	0	0	0	0	0	0	0	0	0	0	0	0	0	0	0	0	0	0	0	0	0	0	0	0	0	0	0	0	0
lib230524_CGTAGTATCACTACGA-1	0	0	0	0	0	0	0	0	0	0	0	0	0	0	0	0	0	0.146953	0	0	0	0	0	0.711172	0	0	0	0	0	0.202586	0	0	0	0	0	0	0	0	0	1	0	0	0	0	0	0	0	0	0
lib230524_CGTGATAAGTGGACTG-1	0	0	0	0	0	0	0	0	0	0	0	0	0	0	0	0	0	0.480287	0	0	0	0.0988506	0	0.604905	0	0	0	0	0	0.142241	0	0	0	0	0	0	0	0	0	0	0	0	0	0	0	0	0	0	0
lib230524_CGTGATAGTCGCGTTG-1	0	0	0	0	0	0	0	0	0	0	0	0	0	0	0	0	0	0	0	0	0	0.101149	0	0	0	0	0	0	0	0.258621	0	0	0	0	0	0	0	0	0	0	0	0	0	0	0	0	0	0	0
lib230524_CGTTAGAAGAGAGCAA-1	0	0	0	0	0	0	0	0	0	0	0	0	0	0	0	0	0	0.480287	0	0	0	0.0988506	0	0.604905	0	0	0	0	0	0.142241	0	0	0	0	0	0	0	0	0	0	0	0	0	0	0	0	0	0	0
lib230524_CGTTCTGCATGGCACC-1	0	0	0	0	0	0	0	0	0	0	0	0	0	0	0	0	0	0	0	0	0	0.101149	0	0	0	0	0	0	0	0.258621	0	0	0	0	0	0	0	0	0	0	0	0	0	0	0	0	0	0	0
lib230524_CGTTGGGAGGTATAGT-1	0	0	0	0	0	0	0	0	0	0	0	0	0	0	0	0	0	0.480287	0	0	0	0.0988506	0	0.604905	0	0	0	0	0	0.142241	0	0	0	0	0	0	0	0	0	0	0	0	0	0	0	0	0	0	0
lib230524_CGTTGGGGTTCTCACC-1	0	0	0	0	0	0	0	0	0	0	0	0	0	0	0	0	0	0.146953	0	0	0	0	0	0.711172	0	0	0	0	0	0.202586	0	0	0	0	0	0	0	0	0	1	0	0	0	0	0	0	0	0	0
lib230524_CTAACCCCAATTTCTC-1	0	0	0	0	0	0	0	0	0	0	0	0	0	1	0	0	0	0	0	0	0	0	0	0	0	0	0	0	0	0	0	0	0	0	0	0	0	0	0	0	0	0	0	0	0	0	0	0	1
lib230524_CTAACCCCATGACTGT-1	0	0	0	0.0868687	0	0	0	0.120155	0	0	0	0	0	0	0	0	0	0.37276	0	0	0	0	0	0	0	0	0.0909091	0	0	0.215517	0	0	0	0	0	0	0	0	0	0	0	0	0	0.0868687	0	0.120155	0	0	0
lib230524_CTAACTTCAGGTTTAC-1	0	0.182313	0	0	0	0	0	0	0	0	0	0	0	0	0	0.163934	0	0.232975	0	0	0	0.232184	0	0	0	0	0	0	0	0.224138	0	0	0	0	0	0	0	0	0	0	0	0	0.182313	0	0	0	0	0	0
lib230524_CTAACTTGTAGCCCTG-1	0	0	0	0	0	0	0	0	0	0	0	0	0	0	0	0	0	0.146953	0	0	0	0	0	0.711172	0	0	0	0	0	0.202586	0	0	0	0	0	0	0	0	0	1	0	0	0	0	0	0	0	0	0
lib230524_CTAACTTGTGGGCTTC-1	0	0	0	0.0868687	0	0	0	0.120155	0	0	0	0	0	0	0	0	0	0.37276	0	0	0	0	0	0	0	0	0.0909091	0	0	0.215517	0	0	0	0	0	0	0	0	0	0	0	0	0	0.0868687	0	0.120155	0	0	0
lib230524_CTAAGTGAGAAATGGG-1	0	0	0	0	0	0	0	0	0	0	0	0	0	1	0	0	0	0	0	0	0	0	0	0	0	0	0	0	0	0	0	0	0	0	0	0	0	0	0	0	0	0	0	0	0	0	0	0	1
lib230524_CTAAGTGGTTAAGCAA-1	0.0571429	0	0	0	0	0.145985	0	0.112403	0	0	0	0	0	0	0	0.188525	0	0	0	0	0	0.0827586	0	0	0	0	0	0	0	0.168103	0	0	0	0	0	0	0	0	0	0	0	0	0.0571429	0	0.145985	0.112403	0	0	0
lib230524_CTACATTAGATGTTGA-1	0.0571429	0	0	0	0	0.145985	0	0.112403	0	0	0	0	0	0	0	0.188525	0	0	0	0	0	0.0827586	0	0	0	0	0	0	0	0.168103	0	0	0	0	0	0	0	0	0	0	0	0	0.0571429	0	0.145985	0.112403	0	0	0
lib230524_CTAGACAGTGCCTATA-1	0.0598639	0.122449	0	0.167677	0	0.413625	0	0	0	0	0	0.060686	0	0	0	0	0	0.390681	0	0.32197	0	0	0	0	0	0.47619	0	0	0	0.366379	0.141447	0	0	0	0	0.508772	0	0	0	0.585714	0	0	0.182313	0.167677	0.413625	0	0	0.060686	0
lib230524_CTAGGTAGTATGGTTC-1	0.0571429	0	0	0	0	0.145985	0	0.112403	0	0	0	0	0	0	0	0.188525	0	0	0	0	0	0.0827586	0	0	0	0	0	0	0	0.168103	0	0	0	0	0	0	0	0	0	0	0	0	0.0571429	0	0.145985	0.112403	0	0	0
lib230524_CTATAGGAGTTACGTC-1	0	0	0	0	0	0	0	0	0	0	0	0	0	1	0	0	0	0	0	0	0	0	0	0	0	0	0	0	0	0	0	0	0	0	0	0	0	0	0	0	0	0	0	0	0	0	0	0	1
lib230524_CTATAGGTCTATCGCC-1	0	0	0	0	0	0	0	0	0	0	0	0	0	0	0	0	0	0	0	0	0	0	0	0	0	0	0	0	0	0	0	0	0	0	0	0	0	0	0	0	0	0	0	0	0	0	0	0	0
lib230524_CTATCCGAGCCATTGT-1	0	0	0	0	0	0	0	0	0	0	0	0	0	0	0	0	0	0	0	0	0	0.101149	0	0	0	0	0	0	0	0.258621	0	0	0	0	0	0	0	0	0	0	0	0	0	0	0	0	0	0	0
lib230524_CTATCCGAGGTCGTCC-1	0	0	0	0	0	0	0	0	0	0	0	0	0	0	0	0	0	0.146953	0	0	0	0	0	0.711172	0	0	0	0	0	0.202586	0	0	0	0	0	0	0	0	0	1	0	0	0	0	0	0	0	0	0
lib230524_CTATCTAAGTCATGGG-1	0	0	0	0.0868687	0	0	0	0.120155	0	0	0	0	0	0	0	0	0	0.37276	0	0	0	0	0	0	0	0	0.0909091	0	0	0.215517	0	0	0	0	0	0	0	0	0	0	0	0	0	0.0868687	0	0.120155	0	0	0
lib230524_CTATCTAGTGGATTTC-1	0	0	0	0	0	0	0	0	0	0	0	0	0	0	0	0	0	0.146953	0	0	0	0	0	0.711172	0	0	0	0	0	0.202586	0	0	0	0	0	0	0	0	0	1	0	0	0	0	0	0	0	0	0
lib230524_CTCAACCAGTTCTCTT-1	0	0.182313	0	0	0	0	0	0	0	0	0	0	0	0	0	0.163934	0	0.232975	0	0	0	0.232184	0	0	0	0	0	0	0	0.224138	0	0	0	0	0	0	0	0	0	0	0	0	0.182313	0	0	0	0	0	0
lib230524_CTCAACCTCATTGAGC-1	0	0	0	0	0	0	0	0	0	0	0	0	0	0	0	0	0	0	0	0	0	0.101149	0	0	0	0	0	0	0	0.258621	0	0	0	0	0	0	0	0	0	0	0	0	0	0	0	0	0	0	0
lib230524_CTCAAGACAAGCCTGC-1	0	0	0	0	0	0	0	0	0	0	0	0	0	1	0	0	0	0	0	0	0	0	0	0	0	0	0	0	0	0	0	0	0	0	0	0	0	0	0	0	0	0	0	0	0	0	0	0	1
lib230524_CTCAAGACAATGCAGG-1	0.0571429	0	0	0	0	0.145985	0	0.112403	0	0	0	0	0	0	0	0.188525	0	0	0	0	0	0.0827586	0	0	0	0	0	0	0	0.168103	0	0	0	0	0	0	0	0	0	0	0	0	0.0571429	0	0.145985	0.112403	0	0	0
lib230524_CTCAATTCAAAGACTA-1	0.0653061	0	0	0	0	0.124088	0	0.205426	0	0	0	0	0	0.884058	0	0.254098	0	0.444444	0	0.219697	0	0.114943	0	0	0	0	0.0988142	0	0	0	0	0	0.103529	0	0	0	0	0	0	0	0	0	0.0653061	0	0.124088	0.205426	0	0	0.884058
lib230524_CTCACTGAGGAGAGGC-1	0	0	0	0	0	0	0.372093	0	0	0	0	0	0	0	0	0	0	0	0	0	0	0	0	0	0	0	0	0	0	0.336207	0	0	0	0	0	0	0	0	0	0	0	0	0	0	0	0.372093	0	0	0
lib230524_CTCACTGGTGGCTGAA-1	0	0	0	0	0	0	0	0	0	0	0	0	0	1	0	0	0	0	0	0	0	0	0	0	0	0	0	0	0	0	0	0	0	0	0	0	0	0	0	0	0	0	0	0	0	0	0	0	1
lib230524_CTCAGAAAGGAATCGC-1	0	0	0	0.0868687	0	0	0	0.120155	0	0	0	0	0	0	0	0	0	0.37276	0	0	0	0	0	0	0	0	0.0909091	0	0	0.215517	0	0	0	0	0	0	0	0	0	0	0	0	0	0.0868687	0	0.120155	0	0	0
lib230524_CTCAGAACAGATACTC-1	0	0	0	0	0	0	0	0	0	0	0	0	0	1	0	0	0	0	0	0	0	0	0	0	0	0	0	0	0	0	0	0	0	0	0	0	0	0	0	0	0	0	0	0	0	0	0	0	1
lib230524_CTCAGAACATCAACCA-1	0.0653061	0	0	0	0	0.124088	0	0.205426	0	0	0	0	0	0.884058	0	0.254098	0	0.444444	0	0.219697	0	0.114943	0	0	0	0	0.0988142	0	0	0	0	0	0.103529	0	0	0	0	0	0	0	0	0	0.0653061	0	0.124088	0.205426	0	0	0.884058
lib230524_CTCAGTCAGGTCCGAA-1	0	0	0	0	0	0	0	0	0	0	0	0	0	0	0	0	0	0	0	0	0	0	0	0	0	0	0	0	0	0	0	0	0	0	0	0	0	0	0	0	0	0	0	0	0	0	0	0	0
lib230524_CTCATCGAGGCTTAGG-1	0	0	0	0	0	0	0	0	0	0	0	0	0	0	0	0	0	0	0	0	0	0	0	0	0	0	0	0	0	0	0	0	0	0	0	0	0	0	0	0	0	0	0	0	0	0	0	0	0
lib230524_CTCATGCTCCAGCACG-1	0	0	0	0	0	0	0	0	0	0	0	0	0	0	0	0	0	0	0	0	0	0.101149	0	0	0	0	0	0	0	0.258621	0	0	0	0	0	0	0	0	0	0	0	0	0	0	0	0	0	0	0
lib230524_CTCATTACAGCGTTTA-1	0	0.182313	0	0	0	0	0	0	0	0	0	0	0	0	0	0.163934	0	0.232975	0	0	0	0.232184	0	0	0	0	0	0	0	0.224138	0	0	0	0	0	0	0	0	0	0	0	0	0.182313	0	0	0	0	0	0
lib230524_CTCATTATCCGCAGTG-1	0	0	0	0	0	0	0	0	0	0	0	0	0	0	0	0	0	0.146953	0	0	0	0	0	0.711172	0	0	0	0	0	0.202586	0	0	0	0	0	0	0	0	0	1	0	0	0	0	0	0	0	0	0
lib230524_CTCCAACTCGTGAGAG-1	0	0	0	0	0	0	0.372093	0	0	0	0	0	0	0	0	0	0	0	0	0	0	0	0	0	0	0	0	0	0	0.336207	0	0	0	0	0	0	0	0	0	0	0	0	0	0	0	0.372093	0	0	0
lib230524_CTCCACAGTAAGATCA-1	0	0	0	0	0	0	0	0	0	0	0	0	0	1	0	0	0	0	0	0	0	0	0	0	0	0	0	0	0	0	0	0	0	0	0	0	0	0	0	0	0	0	0	0	0	0	0	0	1
lib230524_CTCCCTCAGCGATCGA-1	0.0571429	0	0	0	0	0.145985	0	0.112403	0	0	0	0	0	0	0	0.188525	0	0	0	0	0	0.0827586	0	0	0	0	0	0	0	0.168103	0	0	0	0	0	0	0	0	0	0	0	0	0.0571429	0	0.145985	0.112403	0	0	0
lib230524_CTCCCTCAGTTAGTAG-1	0.0598639	0.122449	0	0.167677	0	0.413625	0	0	0	0	0	0.060686	0	0	0	0	0	0.390681	0	0.32197	0	0	0	0	0	0.47619	0	0	0	0.366379	0.141447	0	0	0	0	0.508772	0	0	0	0.585714	0	0	0.182313	0.167677	0.413625	0	0	0.060686	0
lib230524_CTCCGATAGAAGTCCG-1	0	0	0	0.0868687	0	0	0	0.120155	0	0	0	0	0	0	0	0	0	0.37276	0	0	0	0	0	0	0	0	0.0909091	0	0	0.215517	0	0	0	0	0	0	0	0	0	0	0	0	0	0.0868687	0	0.120155	0	0	0
lib230524_CTCCTTTAGATCCTAC-1	0	0	0	0	0	0	0	0	0	0	0	0	0	0	0	0	0	0	0	0	0	0	0	0	0	0	0	0	0	0	0	0	0	0	0	0	0	0	0	0	0	0	0	0	0	0	0	0	0
lib230524_CTCCTTTAGTCATCGT-1	0	0	0	0	0	0	0	0	0	0	0	0	0	1	0	0	0	0	0	0	0	0	0	0	0	0	0	0	0	0	0	0	0	0	0	0	0	0	0	0	0	0	0	0	0	0	0	0	1
lib230524_CTCTCAGGTCAACACT-1	0.0598639	0.122449	0	0.167677	0	0.413625	0	0	0	0	0	0.060686	0	0	0	0	0	0.390681	0	0.32197	0	0	0	0	0	0.47619	0	0	0	0.366379	0.141447	0	0	0	0	0.508772	0	0	0	0.585714	0	0	0.182313	0.167677	0.413625	0	0	0.060686	0
lib230524_CTCTCAGTCCAAGCAT-1	0.0598639	0.122449	0	0.167677	0	0.413625	0	0	0	0	0	0.060686	0	0	0	0	0	0.390681	0	0.32197	0	0	0	0	0	0.47619	0	0	0	0.366379	0.141447	0	0	0	0	0.508772	0	0	0	0.585714	0	0	0.182313	0.167677	0.413625	0	0	0.060686	0
lib230524_CTCTCAGTCGACATCA-1	0	0	0	0	0	0	0	0	0	0	0	0	0	1	0	0	0	0	0	0	0	0	0	0	0	0	0	0	0	0	0	0	0	0	0	0	0	0	0	0	0	0	0	0	0	0	0	0	1
lib230524_CTCTCGACAAAGGATT-1	0	0	0	0	0	0	0	0	0	0	0	0	0	0	0	0	0	0.146953	0	0	0	0	0	0.711172	0	0	0	0	0	0.202586	0	0	0	0	0	0	0	0	0	1	0	0	0	0	0	0	0	0	0
lib230524_CTCTCGAGTATTTCGG-1	0	0	0	0	0	0	0	0	0	0	0	0	0	0	0	0	0	0	0	0	0	0	0	0	0	0	0	0	0	0	0	0	0	0	0	0	0	0	0	0	0	0	0	0	0	0	0	0	0
lib230524_CTCTGGTTCATTCATC-1	0	0	0	0.0868687	0	0	0	0.120155	0	0	0	0	0	0	0	0	0	0.37276	0	0	0	0	0	0	0	0	0.0909091	0	0	0.215517	0	0	0	0	0	0	0	0	0	0	0	0	0	0.0868687	0	0.120155	0	0	0
lib230524_CTCTGGTTCCGAGATT-1	0	0	0	0	0	0	0.372093	0	0	0	0	0	0	0	0	0	0	0	0	0	0	0	0	0	0	0	0	0	0	0.336207	0	0	0	0	0	0	0	0	0	0	0	0	0	0	0	0.372093	0	0	0
lib230524_CTGAATGTCGACGAGA-1	0	0	0	0	0	0	0	0	0	0	0	0	0	1	0	0	0	0	0	0	0	0	0	0	0	0	0	0	0	0	0	0	0	0	0	0	0	0	0	0	0	0	0	0	0	0	0	0	1
lib230524_CTGAATGTCTACTTCA-1	0	0	0	0	0	0	0	0	0	0	0	0	0	1	0	0	0	0	0	0	0	0	0	0	0	0	0	0	0	0	0	0	0	0	0	0	0	0	0	0	0	0	0	0	0	0	0	0	1
lib230524_CTGAGCGAGAGTGTTA-1	0	0	0	0	0	0	0	0	0	0	0	0	0	0	0	0	0	0.146953	0	0	0	0	0	0.711172	0	0	0	0	0	0.202586	0	0	0	0	0	0	0	0	0	1	0	0	0	0	0	0	0	0	0
lib230524_CTGCAGGTCGCGCTGA-1	0	0	0	0	0	0	0	0	0	0	0	0	0	0	0	0	0	0.146953	0	0	0	0	0	0.711172	0	0	0	0	0	0.202586	0	0	0	0	0	0	0	0	0	1	0	0	0	0	0	0	0	0	0
lib230524_CTGCAGGTCTAGCCAA-1	0	0	0	0.0868687	0	0	0	0.120155	0	0	0	0	0	0	0	0	0	0.37276	0	0	0	0	0	0	0	0	0.0909091	0	0	0.215517	0	0	0	0	0	0	0	0	0	0	0	0	0	0.0868687	0	0.120155	0	0	0
lib230524_CTGCATCAGGGTCTTT-1	0	0	0	0	0	0	0	0	0	0	0	0	0	0	0	0	0	0	0	0	0	0	0	0	0	0	0	0	0	0	0	0	0	0	0	0	0	0	0	0	0	0	0	0	0	0	0	0	0
lib230524_CTGCATCCAGAACTAA-1	0	0	0	0	0	0	0	0	0	0	0	0	0	0	0	0	0	0	0	0	0	0	0	0	0	0	0	0	0	0	0	0	0	0	0	0	0	0	0	0	0	0	0	0	0	0	0	0	0
lib230524_CTGCCTATCACGTAGT-1	0	0.182313	0	0	0	0	0	0	0	0	0	0	0	0	0	0.163934	0	0.232975	0	0	0	0.232184	0	0	0	0	0	0	0	0.224138	0	0	0	0	0	0	0	0	0	0	0	0	0.182313	0	0	0	0	0	0
lib230524_CTGCGAGGTGCTGATT-1	0	0	0	0	0	0	0	0	0	0	0	0	0	1	0	0	0	0	0	0	0	0	0	0	0	0	0	0	0	0	0	0	0	0	0	0	0	0	0	0	0	0	0	0	0	0	0	0	1
lib230524_CTGCTCACAGCTCTGG-1	0	0	0	0	0	0	0	0	0	0	0	0	0	0	0	0	0	0.146953	0	0	0	0	0	0.711172	0	0	0	0	0	0.202586	0	0	0	0	0	0	0	0	0	1	0	0	0	0	0	0	0	0	0
lib230524_CTGGCAGCAACCGCTG-1	0	0	0	0	0	0	0	0	0	0	0	0	0	0	0	0	0	0	0	0	0	0	0	0	0	0	0	0	0	0	0	0	0	0	0	0	0	0	0	0	0	0	0	0	0	0	0	0	0
lib230524_CTGGTCTAGTGATTCC-1	0	0	0	0	0	0	0	0	0	0	0	0	0	0	0	0	0	0.146953	0	0	0	0	0	0.711172	0	0	0	0	0	0.202586	0	0	0	0	0	0	0	0	0	1	0	0	0	0	0	0	0	0	0
lib230524_CTGGTCTTCAAGAGTA-1	0	0	0	0	0	0	0	0	0	0	0	0	0	0	0	0	0	0	0	0	0	0.101149	0	0	0	0	0	0	0	0.258621	0	0	0	0	0	0	0	0	0	0	0	0	0	0	0	0	0	0	0
lib230524_CTGGTCTTCGGCGATC-1	0	0	0	0	0	0	0	0	0	0	0	0	0	1	0	0	0	0	0	0	0	0	0	0	0	0	0	0	0	0	0	0	0	0	0	0	0	0	0	0	0	0	0	0	0	0	0	0	1
lib230524_CTGGTCTTCTACTATC-1	0.0598639	0.122449	0	0.167677	0	0.413625	0	0	0	0	0	0.060686	0	0	0	0	0	0.390681	0	0.32197	0	0	0	0	0	0.47619	0	0	0	0.366379	0.141447	0	0	0	0	0.508772	0	0	0	0.585714	0	0	0.182313	0.167677	0.413625	0	0	0.060686	0
lib230524_CTGTACCAGACTTAAG-1	0	0	0	0	0	0	0	0	0	0	0	0	0	0	0	0	0	0	0	0	0	0	0	0	0	0	0	0	0	0	0	0	0	0	0	0	0	0	0	0	0	0	0	0	0	0	0	0	0
lib230524_CTGTAGACACTGATTG-1	0	0	0	0	0	0	0	0	0	0	0	0	0	0	0	0	0	0	0	0	0	0	0	0	0	0	0	0	0	0	0	0	0	0	0	0	0	0	0	0	0	0	0	0	0	0	0	0	0
lib230524_CTGTGAAAGCCTCTCT-1	0	0.771429	0	0	0	0	0	0	0	0	0	0.110818	0	1	0	0	0	0	0	0	0	0	0	0.108992	0	0	0.12253	0	0	0	0	0	0	0	0	0	0	0	0	0	0	0	0.771429	0	0	0	0	0.110818	1
lib230524_CTGTGAACAGGCCTGT-1	0	0	0	0	0	0	0	0	0	0	0	0	0	0	0	0	0	0.146953	0	0	0	0	0	0.711172	0	0	0	0	0	0.202586	0	0	0	0	0	0	0	0	0	1	0	0	0	0	0	0	0	0	0
lib230524_CTGTGAAGTAGTGCGA-1	0.0598639	0.122449	0	0.167677	0	0.413625	0	0	0	0	0	0.060686	0	0	0	0	0	0.390681	0	0.32197	0	0	0	0	0	0.47619	0	0	0	0.366379	0.141447	0	0	0	0	0.508772	0	0	0	0.585714	0	0	0.182313	0.167677	0.413625	0	0	0.060686	0
lib230524_CTTACCGAGATACATG-1	0	0	0	0.0868687	0	0	0	0.120155	0	0	0	0	0	0	0	0	0	0.37276	0	0	0	0	0	0	0	0	0.0909091	0	0	0.215517	0	0	0	0	0	0	0	0	0	0	0	0	0	0.0868687	0	0.120155	0	0	0
lib230524_CTTCAATCAACACTAC-1	0	0	0	0	0	0	0	0	0	0	0	0	0	0	0	0	0	0.480287	0	0	0	0.0988506	0	0.604905	0	0	0	0	0	0.142241	0	0	0	0	0	0	0	0	0	0	0	0	0	0	0	0	0	0	0
lib230524_CTTCAATGTCGCTTAA-1	0	0	0	0	0	0	0	0	0	0	0	0	0	0	0	0	0	0.146953	0	0	0	0	0	0.711172	0	0	0	0	0	0.202586	0	0	0	0	0	0	0	0	0	1	0	0	0	0	0	0	0	0	0
lib230524_CTTCAATGTCTGTGAT-1	0	0	0	0	0	0	0	0	0	0	0	0	0	0	0	0	0	0.146953	0	0	0	0	0	0.711172	0	0	0	0	0	0.202586	0	0	0	0	0	0	0	0	0	1	0	0	0	0	0	0	0	0	0
lib230524_CTTCCGAAGTTGCCTA-1	0	0.182313	0	0	0	0	0	0	0	0	0	0	0	0	0	0.163934	0	0.232975	0	0	0	0.232184	0	0	0	0	0	0	0	0.224138	0	0	0	0	0	0	0	0	0	0	0	0	0.182313	0	0	0	0	0	0
lib230524_CTTCCGAGTTCTCCAC-1	0	0	0	0	0	0	0	0	0	0	0	0	0	1	0	0	0	0	0	0	0	0	0	0	0	0	0	0	0	0	0	0	0	0	0	0	0	0	0	0	0	0	0	0	0	0	0	0	1
lib230524_CTTCCTTGTCCCAAAT-1	0	0	0	0	0	0	0	0	0	0	0	0	0	1	0	0	0	0	0	0	0	0	0	0	0	0	0	0	0	0	0	0	0	0	0	0	0	0	0	0	0	0	0	0	0	0	0	0	1
lib230524_CTTCGGTGTGTTAGCT-1	0	0	0	0	0	0	0	0	0	0	0	0	0	0	0	0	0	0	0	0	0	0.101149	0	0	0	0	0	0	0	0.258621	0	0	0	0	0	0	0	0	0	0	0	0	0	0	0	0	0	0	0
lib230524_CTTCTCTGTTTATGCG-1	0.0598639	0.122449	0	0.167677	0	0.413625	0	0	0	0	0	0.060686	0	0	0	0	0	0.390681	0	0.32197	0	0	0	0	0	0.47619	0	0	0	0.366379	0.141447	0	0	0	0	0.508772	0	0	0	0.585714	0	0	0.182313	0.167677	0.413625	0	0	0.060686	0
lib230524_CTTCTCTTCACGACTA-1	0.0653061	0	0	0	0	0.124088	0	0.205426	0	0	0	0	0	0.884058	0	0.254098	0	0.444444	0	0.219697	0	0.114943	0	0	0	0	0.0988142	0	0	0	0	0	0.103529	0	0	0	0	0	0	0	0	0	0.0653061	0	0.124088	0.205426	0	0	0.884058
lib230524_CTTGATTAGCCTCTGG-1	0	0	0	0.0868687	0	0	0	0.120155	0	0	0	0	0	0	0	0	0	0.37276	0	0	0	0	0	0	0	0	0.0909091	0	0	0.215517	0	0	0	0	0	0	0	0	0	0	0	0	0	0.0868687	0	0.120155	0	0	0
lib230524_CTTGATTGTTAGAAGT-1	0	0	0	0	0	0	0	0	0	0	0	0	0	0	0	0	0	0	0	0	0	0.101149	0	0	0	0	0	0	0	0.258621	0	0	0	0	0	0	0	0	0	0	0	0	0	0	0	0	0	0	0
lib230524_CTTTCAAAGTAACCTC-1	0.0653061	0	0	0	0	0.124088	0	0.205426	0	0	0	0	0	0.884058	0	0.254098	0	0.444444	0	0.219697	0	0.114943	0	0	0	0	0.0988142	0	0	0	0	0	0.103529	0	0	0	0	0	0	0	0	0	0.0653061	0	0.124088	0.205426	0	0	0.884058
lib230524_GAAGAATAGAGGTCGT-1	0	0	0	0	0	0	0	0	0	0	0	0	0	1	0	0	0	0	0	0	0	0	0	0	0	0	0	0	0	0	0	0	0	0	0	0	0	0	0	0	0	0	0	0	0	0	0	0	1
lib230524_GAAGAATTCCAAATGC-1	0	0	0	0	0	0	0	0	0	0	0	0	0	0	0	0	0	0	0	0	0	0	0	0	0	0	0	0	0	0	0	0	0	0	0	0	0	0	0	0	0	0	0	0	0	0	0	0	0
lib230524_GAAGAATTCCCTATTA-1	0	0	0	0	0	0	0	0	0	0	0	0	0	1	0	0	0	0	0	0	0	0	0	0	0	0	0	0	0	0	0	0	0	0	0	0	0	0	0	0	0	0	0	0	0	0	0	0	1
lib230524_GAAGAATTCTCGTCGT-1	0	0	0	0	0	0	0	0	0	0	0	0	0	0	0	0	0	0.146953	0	0	0	0	0	0.711172	0	0	0	0	0	0.202586	0	0	0	0	0	0	0	0	0	1	0	0	0	0	0	0	0	0	0
lib230524_GAAGCCCGTCGCTTGG-1	0	0	0	0.0868687	0	0	0	0.120155	0	0	0	0	0	0	0	0	0	0.37276	0	0	0	0	0	0	0	0	0.0909091	0	0	0.215517	0	0	0	0	0	0	0	0	0	0	0	0	0	0.0868687	0	0.120155	0	0	0
lib230524_GAAGCGAGTAGCTCGC-1	0	0	0	0	0	0	0	0	0	0	0	0	0	0	0	0	0	0.480287	0	0	0	0.0988506	0	0.604905	0	0	0	0	0	0.142241	0	0	0	0	0	0	0	0	0	0	0	0	0	0	0	0	0	0	0
lib230524_GAAGGGTAGCCGTTAT-1	0	0	0	0	0	0	0	0	0	0	0	0	0	1	0	0	0	0	0	0	0	0	0	0	0	0	0	0	0	0	0	0	0	0	0	0	0	0	0	0	0	0	0	0	0	0	0	0	1
lib230524_GAAGGGTTCCGGGACT-1	0	0	0	0	0	0	0	0	0	0	0	0	0	1	0	0	0	0	0	0	0	0	0	0	0	0	0	0	0	0	0	0	0	0	0	0	0	0	0	0	0	0	0	0	0	0	0	0	1
lib230524_GAAGTAACACCTATCC-1	0	0	0	0	0	0	0	0	0	0	0	0	0	1	0	0	0	0	0	0	0	0	0	0	0	0	0	0	0	0	0	0	0	0	0	0	0	0	0	0	0	0	0	0	0	0	0	0	1
lib230524_GAAGTAAGTAGTACGG-1	0	0	0	0	0	0	0	0	0	0	0	0	0	1	0	0	0	0	0	0	0	0	0	0	0	0	0	0	0	0	0	0	0	0	0	0	0	0	0	0	0	0	0	0	0	0	0	0	1
lib230524_GAATCGTGTGTCCTAA-1	0	0	0	0	0	0	0	0	0	0	0	0	0	1	0	0	0	0	0	0	0	0	0	0	0	0	0	0	0	0	0	0	0	0	0	0	0	0	0	0	0	0	0	0	0	0	0	0	1
lib230524_GACACGCCACTCCTGT-1	0	0	0	0	0	0	0	0	0	0	0	0	0	0	0	0	0	0.146953	0	0	0	0	0	0.711172	0	0	0	0	0	0.202586	0	0	0	0	0	0	0	0	0	1	0	0	0	0	0	0	0	0	0
lib230524_GACATCAGTAGCTCGC-1	0	0	0	0	0	0	0	0	0	0	0	0	0	1	0	0	0	0	0	0	0	0	0	0	0	0	0	0	0	0	0	0	0	0	0	0	0	0	0	0	0	0	0	0	0	0	0	0	1
lib230524_GACCCAGCATCAACCA-1	0	0	0	0	0	0	0	0	0	0	0	0	0	0	0	0	0	0.146953	0	0	0	0	0	0.711172	0	0	0	0	0	0.202586	0	0	0	0	0	0	0	0	0	1	0	0	0	0	0	0	0	0	0
lib230524_GACCCAGTCGTGGGTC-1	0	0	0	0	0	0	0	0	0	0	0	0	0	0	0	0	0	0	0	0	0	0	0	0	0	0	0	0	0	0	0	0	0	0	0	0	0	0	0	0	0	0	0	0	0	0	0	0	0
lib230524_GACCCTTTCAGCTTGA-1	0.0571429	0	0	0	0	0.145985	0	0.112403	0	0	0	0	0	0	0	0.188525	0	0	0	0	0	0.0827586	0	0	0	0	0	0	0	0.168103	0	0	0	0	0	0	0	0	0	0	0	0	0.0571429	0	0.145985	0.112403	0	0	0
lib230524_GACCGTGGTCAGACGA-1	0	0	0	0	0	0	0	0	0	0	0	0	0	0	0	0	0	0.146953	0	0	0	0	0	0.711172	0	0	0	0	0	0.202586	0	0	0	0	0	0	0	0	0	1	0	0	0	0	0	0	0	0	0
lib230524_GACCGTGGTTTGATCG-1	0	0	0	0	0	0	0.372093	0	0	0	0	0	0	0	0	0	0	0	0	0	0	0	0	0	0	0	0	0	0	0.336207	0	0	0	0	0	0	0	0	0	0	0	0	0	0	0	0.372093	0	0	0
lib230524_GACCTTCAGTTGCTCA-1	0	0	0	0	0	0	0	0	0	0	0	0	0	0	0	0	0	0	0	0	0	0.101149	0	0	0	0	0	0	0	0.258621	0	0	0	0	0	0	0	0	0	0	0	0	0	0	0	0	0	0	0
lib230524_GACCTTCCAAGTGTCT-1	0	0	0	0	0	0	0	0	0	0	0	0	0	0	0	0	0	0	0	0	0	0	0	0	0	0	0	0	0	0	0	0	0	0	0	0	0	0	0	0	0	0	0	0	0	0	0	0	0
lib230524_GACGCTGAGAGTCCGA-1	0	0	0	0	0	0	0	0	0	0	0	0	0	0	0	0	0	0	0	0	0	0	0	0	0	0	0	0	0	0	0	0	0	0	0	0	0	0	0	0	0	0	0	0	0	0	0	0	0
lib230524_GACGCTGGTCGGTACC-1	0	0.182313	0	0	0	0	0	0	0	0	0	0	0	0	0	0.163934	0	0.232975	0	0	0	0.232184	0	0	0	0	0	0	0	0.224138	0	0	0	0	0	0	0	0	0	0	0	0	0.182313	0	0	0	0	0	0
lib230524_GACTCAAAGAGCCCAA-1	0.0571429	0	0	0	0	0.145985	0	0.112403	0	0	0	0	0	0	0	0.188525	0	0	0	0	0	0.0827586	0	0	0	0	0	0	0	0.168103	0	0	0	0	0	0	0	0	0	0	0	0	0.0571429	0	0.145985	0.112403	0	0	0
lib230524_GACTCAAGTATGCGTT-1	0	0	0	0	0	0	0	0	0	0	0	0	0	0	0	0	0	0	0	0	0	0	0	0	0	0	0	0	0	0	0	0	0	0	0	0	0	0	0	0	0	0	0	0	0	0	0	0	0
lib230524_GACTCAAGTCCAACGC-1	0	0	0	0	0	0	0.372093	0	0	0	0	0	0	0	0	0	0	0	0	0	0	0	0	0	0	0	0	0	0	0.336207	0	0	0	0	0	0	0	0	0	0	0	0	0	0	0	0.372093	0	0	0
lib230524_GACTCAAGTGCCGTAC-1	0	0	0	0	0	0	0	0	0	0	0	0	0	0	0	0	0	0	0	0	0	0	0	0	0	0	0	0	0	0	0	0	0	0	0	0	0	0	0	0	0	0	0	0	0	0	0	0	0
lib230524_GACTCAATCAAGAGTA-1	0	0	0	0	0	0	0	0	0	0	0	0	0	1	0	0	0	0	0	0	0	0	0	0	0	0	0	0	0	0	0	0	0	0	0	0	0	0	0	0	0	0	0	0	0	0	0	0	1
lib230524_GACTCTCAGGGATCTG-1	0	0	0	0	0	0	0	0	0	0	0	0	0	1	0	0	0	0	0	0	0	0	0	0	0	0	0	0	0	0	0	0	0	0	0	0	0	0	0	0	0	0	0	0	0	0	0	0	1
lib230524_GACTGATAGCGATGGT-1	0.0653061	0	0	0	0	0.124088	0	0.205426	0	0	0	0	0	0.884058	0	0.254098	0	0.444444	0	0.219697	0	0.114943	0	0	0	0	0.0988142	0	0	0	0	0	0.103529	0	0	0	0	0	0	0	0	0	0.0653061	0	0.124088	0.205426	0	0	0.884058
lib230524_GACTGATCACAAGCCC-1	0	0	0	0	0	0	0	0	0	0	0	0	0	0	0	0	0	0	0	0	0	0.101149	0	0	0	0	0	0	0	0.258621	0	0	0	0	0	0	0	0	0	0	0	0	0	0	0	0	0	0	0
lib230524_GACTTCCCAGACAAAT-1	0	0	0	0	0	0	0	0	0	0	0	0	0	0	0	0	0	0	0	0	0	0	0	0	0	0	0	0	0	0	0	0	0	0	0	0	0	0	0	0	0	0	0	0	0	0	0	0	0
lib230524_GAGAAATCAGGTTACT-1	0	0	0	0	0	0	0	0	0	0	0	0	0	0	0	0	0	0	0	0	0	0.101149	0	0	0	0	0	0	0	0.258621	0	0	0	0	0	0	0	0	0	0	0	0	0	0	0	0	0	0	0
lib230524_GAGACCCGTACCCGAC-1	0.0653061	0	0	0	0	0.124088	0	0.205426	0	0	0	0	0	0.884058	0	0.254098	0	0.444444	0	0.219697	0	0.114943	0	0	0	0	0.0988142	0	0	0	0	0	0.103529	0	0	0	0	0	0	0	0	0	0.0653061	0	0.124088	0.205426	0	0	0.884058
lib230524_GAGACTTAGTGCACTT-1	0	0.771429	0	0	0	0	0	0	0	0	0	0.110818	0	1	0	0	0	0	0	0	0	0	0	0.108992	0	0	0.12253	0	0	0	0	0	0	0	0	0	0	0	0	0	0	0	0.771429	0	0	0	0	0.110818	1
lib230524_GAGACTTCAATTTCGG-1	0	0	0	0	0	0	0	0	0	0	0	0	0	0	0	0	0	0.480287	0	0	0	0.0988506	0	0.604905	0	0	0	0	0	0.142241	0	0	0	0	0	0	0	0	0	0	0	0	0	0	0	0	0	0	0
lib230524_GAGACTTCACCAGTTA-1	0	0	0	0	0	0	0	0	0	0	0	0	0	0	0	0	0	0	0	0	0	0.101149	0	0	0	0	0	0	0	0.258621	0	0	0	0	0	0	0	0	0	0	0	0	0	0	0	0	0	0	0
lib230524_GAGAGGTAGCGTTCAT-1	0	0	0	0	0	0	0	0	0	0	0	0	0	0	0	0	0	0	0	0	0	0	0	0	0	0	0	0	0	0	0	0	0	0	0	0	0	0	0	0	0	0	0	0	0	0	0	0	0
lib230524_GAGAGGTAGTGTAGAT-1	0	0	0	0	0	0	0	0	0	0	0	0	0	1	0	0	0	0	0	0	0	0	0	0	0	0	0	0	0	0	0	0	0	0	0	0	0	0	0	0	0	0	0	0	0	0	0	0	1
lib230524_GAGATGGCACTTGAGT-1	0	0	0	0.0868687	0	0	0	0.120155	0	0	0	0	0	0	0	0	0	0.37276	0	0	0	0	0	0	0	0	0.0909091	0	0	0.215517	0	0	0	0	0	0	0	0	0	0	0	0	0	0.0868687	0	0.120155	0	0	0
lib230524_GAGCCTGTCCTGTACC-1	0.0571429	0	0	0	0	0.145985	0	0.112403	0	0	0	0	0	0	0	0.188525	0	0	0	0	0	0.0827586	0	0	0	0	0	0	0	0.168103	0	0	0	0	0	0	0	0	0	0	0	0	0.0571429	0	0.145985	0.112403	0	0	0
lib230524_GAGGCCTAGACCAGAC-1	0	0	0	0	0	0	0	0	0	0	0	0	0	0	0	0	0	0.146953	0	0	0	0	0	0.711172	0	0	0	0	0	0.202586	0	0	0	0	0	0	0	0	0	1	0	0	0	0	0	0	0	0	0
lib230524_GAGGGATTCCACAGCG-1	0	0	0	0	0	0	0	0	0	0	0	0	0	0	0	0	0	0	0	0	0	0	0	0	0	0	0	0	0	0	0	0	0	0	0	0	0	0	0	0	0	0	0	0	0	0	0	0	0
lib230524_GAGGGTAGTCTTGCTC-1	0	0	0	0	0	0	0	0	0	0	0	0	0	0	0	0	0	0	0	0	0	0.101149	0	0	0	0	0	0	0	0.258621	0	0	0	0	0	0	0	0	0	0	0	0	0	0	0	0	0	0	0
lib230524_GAGTCATGTACTTGTG-1	0	0	0	0.0868687	0	0	0	0.120155	0	0	0	0	0	0	0	0	0	0.37276	0	0	0	0	0	0	0	0	0.0909091	0	0	0.215517	0	0	0	0	0	0	0	0	0	0	0	0	0	0.0868687	0	0.120155	0	0	0
lib230524_GAGTCTAAGTGACACG-1	0	0.182313	0	0	0	0	0	0	0	0	0	0	0	0	0	0.163934	0	0.232975	0	0	0	0.232184	0	0	0	0	0	0	0	0.224138	0	0	0	0	0	0	0	0	0	0	0	0	0.182313	0	0	0	0	0	0
lib230524_GAGTCTACATCACAGT-1	0	0	0	0	0	0	0.372093	0	0	0	0	0	0	0	0	0	0	0	0	0	0	0	0	0	0	0	0	0	0	0.336207	0	0	0	0	0	0	0	0	0	0	0	0	0	0	0	0.372093	0	0	0
lib230524_GAGTGAGTCGACGCTG-1	0	0	0	0	0	0	0	0	0	0	0	0	0	0	0	0	0	0	0	0	0	0	0	0	0	0	0	0	0	0	0	0	0	0	0	0	0	0	0	0	0	0	0	0	0	0	0	0	0
lib230524_GAGTGTTGTAACATCC-1	0	0	0	0	0	0	0	0	0	0	0	0	0	0	0	0	0	0	0	0	0	0	0	0	0	0	0	0	0	0	0	0	0	0	0	0	0	0	0	0	0	0	0	0	0	0	0	0	0
lib230524_GAGTTTGGTTTGAACC-1	0	0	0	0	0	0	0.372093	0	0	0	0	0	0	0	0	0	0	0	0	0	0	0	0	0	0	0	0	0	0	0.336207	0	0	0	0	0	0	0	0	0	0	0	0	0	0	0	0.372093	0	0	0
lib230524_GATAGAATCTTCGTGC-1	0	0	0	0	0	0	0	0	0	0	0	0	0	0	0	0	0	0	0	0	0	0.101149	0	0	0	0	0	0	0	0.258621	0	0	0	0	0	0	0	0	0	0	0	0	0	0	0	0	0	0	0
lib230524_GATCAGTGTGGTCTTA-1	0.0598639	0.122449	0	0.167677	0	0.413625	0	0	0	0	0	0.060686	0	0	0	0	0	0.390681	0	0.32197	0	0	0	0	0	0.47619	0	0	0	0.366379	0.141447	0	0	0	0	0.508772	0	0	0	0.585714	0	0	0.182313	0.167677	0.413625	0	0	0.060686	0
lib230524_GATCATGAGCGTCAAG-1	0	0	0	0	0	0	0.372093	0	0	0	0	0	0	0	0	0	0	0	0	0	0	0	0	0	0	0	0	0	0	0.336207	0	0	0	0	0	0	0	0	0	0	0	0	0	0	0	0.372093	0	0	0
lib230524_GATCCCTCACTGCGTG-1	0	0	0	0	0	0	0	0	0	0	0	0	0	1	0	0	0	0	0	0	0	0	0	0	0	0	0	0	0	0	0	0	0	0	0	0	0	0	0	0	0	0	0	0	0	0	0	0	1
lib230524_GATGACTCAATCCAGT-1	0	0.182313	0	0	0	0	0	0	0	0	0	0	0	0	0	0.163934	0	0.232975	0	0	0	0.232184	0	0	0	0	0	0	0	0.224138	0	0	0	0	0	0	0	0	0	0	0	0	0.182313	0	0	0	0	0	0
lib230524_GATGACTGTAATGTGA-1	0	0	0	0	0	0	0	0	0	0	0	0	0	0	0	0	0	0	0	0	0	0	0	0	0	0	0	0	0	0	0	0	0	0	0	0	0	0	0	0	0	0	0	0	0	0	0	0	0
lib230524_GATGACTGTCTTTATC-1	0	0.167347	0	0	0	0	0	0.162791	0	0	0	0	0	0	0	0.188525	0	0.129032	0	0	0	0	0	0	0	0	0	0	0	0	0	0	0	0.251765	0	0	0	0	0	0	0	0	0.167347	0	0	0.162791	0	0	0
lib230524_GATGATCAGGAGTCTG-1	0	0	0	0	0	0	0.372093	0	0	0	0	0	0	0	0	0	0	0	0	0	0	0	0	0	0	0	0	0	0	0.336207	0	0	0	0	0	0	0	0	0	0	0	0	0	0	0	0.372093	0	0	0
lib230524_GATGCTAAGCTGGCTC-1	0	0	0	0	0	0	0.372093	0	0	0	0	0	0	0	0	0	0	0	0	0	0	0	0	0	0	0	0	0	0	0.336207	0	0	0	0	0	0	0	0	0	0	0	0	0	0	0	0.372093	0	0	0
lib230524_GATGCTACAGTTACCA-1	0	0	0	0	0	0	0	0	0	0	0	0	0	0	0	0	0	0	0	0	0	0	0	0	0	0	0	0	0	0	0	0	0	0	0	0	0	0	0	0	0	0	0	0	0	0	0	0	0
lib230524_GATGGAGAGGCATGGT-1	0	0	0	0.0868687	0	0	0	0.120155	0	0	0	0	0	0	0	0	0	0.37276	0	0	0	0	0	0	0	0	0.0909091	0	0	0.215517	0	0	0	0	0	0	0	0	0	0	0	0	0	0.0868687	0	0.120155	0	0	0
lib230524_GATGGAGCAGGATGAC-1	0.0653061	0	0	0	0	0.124088	0	0.205426	0	0	0	0	0	0.884058	0	0.254098	0	0.444444	0	0.219697	0	0.114943	0	0	0	0	0.0988142	0	0	0	0	0	0.103529	0	0	0	0	0	0	0	0	0	0.0653061	0	0.124088	0.205426	0	0	0.884058
lib230524_GATGTTGCAAGCTACT-1	0	0	0	0	0	0	0	0	0	0	0	0	0	0	0	0	0	0	0	0	0	0	0	0	0	0	0	0	0	0	0	0	0	0	0	0	0	0	0	0	0	0	0	0	0	0	0	0	0
lib230524_GATGTTGCACCGTGAC-1	0	0	0	0	0	0	0	0	0	0	0	0	0	0	0	0	0	0	0	0	0	0	0	0	0	0	0	0	0	0	0	0	0	0	0	0	0	0	0	0	0	0	0	0	0	0	0	0	0
lib230524_GATTTCTAGCCAAGGT-1	0	0	0	0	0	0	0	0	0	0	0	0	0	0	0	0	0	0	0	0	0	0	0	0	0	0	0	0	0	0	0	0	0	0	0	0	0	0	0	0	0	0	0	0	0	0	0	0	0
lib230524_GATTTCTAGCGCCTAC-1	0	0.771429	0	0	0	0	0	0	0	0	0	0.110818	0	1	0	0	0	0	0	0	0	0	0	0.108992	0	0	0.12253	0	0	0	0	0	0	0	0	0	0	0	0	0	0	0	0.771429	0	0	0	0	0.110818	1
lib230524_GATTTCTGTAGACGTG-1	0.0598639	0.122449	0	0.167677	0	0.413625	0	0	0	0	0	0.060686	0	0	0	0	0	0.390681	0	0.32197	0	0	0	0	0	0.47619	0	0	0	0.366379	0.141447	0	0	0	0	0.508772	0	0	0	0.585714	0	0	0.182313	0.167677	0.413625	0	0	0.060686	0
lib230524_GATTTCTGTATCGTTG-1	0	0	0	0	0	0	0	0	0	0	0	0	0	1	0	0	0	0	0	0	0	0	0	0	0	0	0	0	0	0	0	0	0	0	0	0	0	0	0	0	0	0	0	0	0	0	0	0	1
lib230524_GCAACATGTCTTGAGT-1	0	0	0	0	0	0	0	0	0	0	0	0	0	1	0	0	0	0	0	0	0	0	0	0	0	0	0	0	0	0	0	0	0	0	0	0	0	0	0	0	0	0	0	0	0	0	0	0	1
lib230524_GCAACATGTTAGAGAT-1	0	0.104762	0	0.109091	0	0	0	0.395349	0	0.27707	0	0	0	0	0	0	0	0	0	0	0	0	0	0	0	0.444444	0	0	0	0.219828	0	0	0	0	0	0	0	0	0	0	0	0	0.104762	0.109091	0	0.395349	0.27707	0	0
lib230524_GCAACATTCACTAGCA-1	0	0.182313	0	0	0	0	0	0	0	0	0	0	0	0	0	0.163934	0	0.232975	0	0	0	0.232184	0	0	0	0	0	0	0	0.224138	0	0	0	0	0	0	0	0	0	0	0	0	0.182313	0	0	0	0	0	0
lib230524_GCAACCGCACCAGACC-1	0.0598639	0.122449	0	0.167677	0	0.413625	0	0	0	0	0	0.060686	0	0	0	0	0	0.390681	0	0.32197	0	0	0	0	0	0.47619	0	0	0	0.366379	0.141447	0	0	0	0	0.508772	0	0	0	0.585714	0	0	0.182313	0.167677	0.413625	0	0	0.060686	0
lib230524_GCACATATCGTCGGGT-1	0.0598639	0.122449	0	0.167677	0	0.413625	0	0	0	0	0	0.060686	0	0	0	0	0	0.390681	0	0.32197	0	0	0	0	0	0.47619	0	0	0	0.366379	0.141447	0	0	0	0	0.508772	0	0	0	0.585714	0	0	0.182313	0.167677	0.413625	0	0	0.060686	0
lib230524_GCACGTGAGGCTTCCG-1	0	0	0	0	0	0	0.372093	0	0	0	0	0	0	0	0	0	0	0	0	0	0	0	0	0	0	0	0	0	0	0.336207	0	0	0	0	0	0	0	0	0	0	0	0	0	0	0	0.372093	0	0	0
lib230524_GCACGTGCAATCGCAT-1	0	0	0	0	0	0	0	0	0	0	0	0	0	1	0	0	0	0	0	0	0	0	0	0	0	0	0	0	0	0	0	0	0	0	0	0	0	0	0	0	0	0	0	0	0	0	0	0	1
lib230524_GCAGCCACATCAACCA-1	0	0	0	0	0	0	0.372093	0	0	0	0	0	0	0	0	0	0	0	0	0	0	0	0	0	0	0	0	0	0	0.336207	0	0	0	0	0	0	0	0	0	0	0	0	0	0	0	0.372093	0	0	0
lib230524_GCAGGCTTCGAGATGG-1	0	0	0	0	0	0	0	0	0	0	0	0	0	0	0	0	0	0.146953	0	0	0	0	0	0.711172	0	0	0	0	0	0.202586	0	0	0	0	0	0	0	0	0	1	0	0	0	0	0	0	0	0	0
lib230524_GCAGTTATCCGATCGG-1	0	0	0	0	0	0	0	0	0	0	0	0	0	1	0	0	0	0	0	0	0	0	0	0	0	0	0	0	0	0	0	0	0	0	0	0	0	0	0	0	0	0	0	0	0	0	0	0	1
lib230524_GCATCGGCACCAGTAT-1	0	0	0	0	0	0	0	0	0	0	0	0	0	0	0	0	0	0.146953	0	0	0	0	0	0.711172	0	0	0	0	0	0.202586	0	0	0	0	0	0	0	0	0	1	0	0	0	0	0	0	0	0	0
lib230524_GCATGATAGGGCAGAG-1	0	0	0	0.0868687	0	0	0	0.120155	0	0	0	0	0	0	0	0	0	0.37276	0	0	0	0	0	0	0	0	0.0909091	0	0	0.215517	0	0	0	0	0	0	0	0	0	0	0	0	0	0.0868687	0	0.120155	0	0	0
lib230524_GCATTAGGTTAGCGGA-1	0	0	0	0	0	0	0	0	0	0	0	0	0	0	0	0	0	0	0	0	0	0.101149	0	0	0	0	0	0	0	0.258621	0	0	0	0	0	0	0	0	0	0	0	0	0	0	0	0	0	0	0
lib230524_GCCAGCATCACGTCCT-1	0	0	0	0.0868687	0	0	0	0.120155	0	0	0	0	0	0	0	0	0	0.37276	0	0	0	0	0	0	0	0	0.0909091	0	0	0.215517	0	0	0	0	0	0	0	0	0	0	0	0	0	0.0868687	0	0.120155	0	0	0
lib230524_GCCAGGTAGTAAACGT-1	0	0	0	0	0	0	0	0	0	0	0	0	0	0	0	0	0	0.146953	0	0	0	0	0	0.711172	0	0	0	0	0	0.202586	0	0	0	0	0	0	0	0	0	1	0	0	0	0	0	0	0	0	0
lib230524_GCCAGTGAGCCGATAG-1	0	0	0	0	0	0	0	0	0	0	0	0	0	0	0	0	0	0.480287	0	0	0	0.0988506	0	0.604905	0	0	0	0	0	0.142241	0	0	0	0	0	0	0	0	0	0	0	0	0	0	0	0	0	0	0
lib230524_GCCAGTGTCCTTCACG-1	0	0	0	0.0868687	0	0	0	0.120155	0	0	0	0	0	0	0	0	0	0.37276	0	0	0	0	0	0	0	0	0.0909091	0	0	0.215517	0	0	0	0	0	0	0	0	0	0	0	0	0	0.0868687	0	0.120155	0	0	0
lib230524_GCCAGTGTCTACGGTA-1	0	0	0	0	0	0	0	0	0	0	0	0	0	0	0	0	0	0	0	0	0	0.101149	0	0	0	0	0	0	0	0.258621	0	0	0	0	0	0	0	0	0	0	0	0	0	0	0	0	0	0	0
lib230524_GCCATGGAGCCTGAGA-1	0.0598639	0.122449	0	0.167677	0	0.413625	0	0	0	0	0	0.060686	0	0	0	0	0	0.390681	0	0.32197	0	0	0	0	0	0.47619	0	0	0	0.366379	0.141447	0	0	0	0	0.508772	0	0	0	0.585714	0	0	0.182313	0.167677	0.413625	0	0	0.060686	0
lib230524_GCCATTCCAAATGAAC-1	0	0	0	0	0	0	0	0	0	0	0	0	0	0	0	0	0	0	0	0	0	0	0	0	0	0	0	0	0	0	0	0	0	0	0	0	0	0	0	0	0	0	0	0	0	0	0	0	0
lib230524_GCCCAGACACCGAATT-1	0	0	0	0	0	0	0	0	0	0	0	0	0	0	0	0	0	0.146953	0	0	0	0	0	0.711172	0	0	0	0	0	0.202586	0	0	0	0	0	0	0	0	0	1	0	0	0	0	0	0	0	0	0
lib230524_GCCCGAAAGACGCTCC-1	0	0	0	0	0	0	0	0	0	0	0	0	0	1	0	0	0	0	0	0	0	0	0	0	0	0	0	0	0	0	0	0	0	0	0	0	0	0	0	0	0	0	0	0	0	0	0	0	1
lib230524_GCCCGAACAATTGCAC-1	0	0	0	0	0	0	0	0	0	0	0	0	0	1	0	0	0	0	0	0	0	0	0	0	0	0	0	0	0	0	0	0	0	0	0	0	0	0	0	0	0	0	0	0	0	0	0	0	1
lib230524_GCGAGAAAGCCAAGGT-1	0	0	0	0	0	0	0	0	0	0	0	0	0	0	0	0	0	0.480287	0	0	0	0.0988506	0	0.604905	0	0	0	0	0	0.142241	0	0	0	0	0	0	0	0	0	0	0	0	0	0	0	0	0	0	0
lib230524_GCGGATCGTTCGATTG-1	0	0.182313	0	0	0	0	0	0	0	0	0	0	0	0	0	0.163934	0	0.232975	0	0	0	0.232184	0	0	0	0	0	0	0	0.224138	0	0	0	0	0	0	0	0	0	0	0	0	0.182313	0	0	0	0	0	0
lib230524_GCGTGCATCCCAAGCG-1	0	0	0	0	0	0	0	0	0	0	0	0	0	0	0	0	0	0	0	0	0	0	0	0	0	0	0	0	0	0	0	0	0	0	0	0	0	0	0	0	0	0	0	0	0	0	0	0	0
lib230524_GCTACAAAGACGTCCC-1	0.0653061	0	0	0	0	0.124088	0	0.205426	0	0	0	0	0	0.884058	0	0.254098	0	0.444444	0	0.219697	0	0.114943	0	0	0	0	0.0988142	0	0	0	0	0	0.103529	0	0	0	0	0	0	0	0	0	0.0653061	0	0.124088	0.205426	0	0	0.884058
lib230524_GCTACCTCAGCAGATG-1	0	0	0	0	0	0	0	0	0	0	0	0	0	0	0	0	0	0	0	0	0	0	0	0	0	0	0	0	0	0	0	0	0	0	0	0	0	0	0	0	0	0	0	0	0	0	0	0	0
lib230524_GCTACCTGTATTCTCT-1	0	0.182313	0	0	0	0	0	0	0	0	0	0	0	0	0	0.163934	0	0.232975	0	0	0	0.232184	0	0	0	0	0	0	0	0.224138	0	0	0	0	0	0	0	0	0	0	0	0	0.182313	0	0	0	0	0	0
lib230524_GCTCAAACAATGACCT-1	0	0	0	0	0	0	0	0	0	0	0	0	0	0	0	0	0	0.146953	0	0	0	0	0	0.711172	0	0	0	0	0	0.202586	0	0	0	0	0	0	0	0	0	1	0	0	0	0	0	0	0	0	0
lib230524_GCTCAAACAGCGAGTA-1	0	0	0	0	0	0	0	0	0	0	0	0	0	0	0	0	0	0	0	0	0	0	0	0	0	0	0	0	0	0	0	0	0	0	0	0	0	0	0	0	0	0	0	0	0	0	0	0	0
lib230524_GCTTCACCACACGCCA-1	0	0	0	0	0	0	0	0	0	0	0	0	0	0	0	0	0	0.146953	0	0	0	0	0	0.711172	0	0	0	0	0	0.202586	0	0	0	0	0	0	0	0	0	1	0	0	0	0	0	0	0	0	0
lib230524_GCTTGGGGTGTTCCAA-1	0	0	0	0	0	0	0	0	0	0	0	0	0	1	0	0	0	0	0	0	0	0	0	0	0	0	0	0	0	0	0	0	0	0	0	0	0	0	0	0	0	0	0	0	0	0	0	0	1
lib230524_GGAAGTGGTACCCGCA-1	0	0	0	0	0	0	0	0	0	0	0	0	0	1	0	0	0	0	0	0	0	0	0	0	0	0	0	0	0	0	0	0	0	0	0	0	0	0	0	0	0	0	0	0	0	0	0	0	1
lib230524_GGAATGGAGGAAGAAC-1	0	0	0	0	0	0	0	0	0	0	0	0	0	1	0	0	0	0	0	0	0	0	0	0	0	0	0	0	0	0	0	0	0	0	0	0	0	0	0	0	0	0	0	0	0	0	0	0	1
lib230524_GGACGTCAGCTACTAC-1	0	0	0	0	0	0	0	0	0	0	0	0	0	0	0	0	0	0	0	0	0	0	0	0	0	0	0	0	0	0	0	0	0	0	0	0	0	0	0	0	0	0	0	0	0	0	0	0	0
lib230524_GGAGATGGTGAACCGA-1	0	0	0	0	0	0	0	0	0	0	0	0	0	1	0	0	0	0	0	0	0	0	0	0	0	0	0	0	0	0	0	0	0	0	0	0	0	0	0	0	0	0	0	0	0	0	0	0	1
lib230524_GGAGCAAAGAGTGTTA-1	0	0	0	0	0	0	0	0	0	0	0	0	0	0	0	0	0	0	0	0	0	0	0	0	0	0	0	0	0	0	0	0	0	0	0	0	0	0	0	0	0	0	0	0	0	0	0	0	0
lib230524_GGATGTTCAAAGCACG-1	0	0	0	0	0	0	0	0	0	0	0	0	0	0	0	0	0	0	0	0	0	0	0	0	0	0	0	0	0	0	0	0	0	0	0	0	0	0	0	0	0	0	0	0	0	0	0	0	0
lib230524_GGCGTCAGTCATAACC-1	0	0	0	0	0	0	0	0	0	0	0	0	0	1	0	0	0	0	0	0	0	0	0	0	0	0	0	0	0	0	0	0	0	0	0	0	0	0	0	0	0	0	0	0	0	0	0	0	1
lib230524_GGCTTGGTCGTGACTA-1	0	0	0	0	0	0	0	0	0	0	0	0	0	0	0	0	0	0.480287	0	0	0	0.0988506	0	0.604905	0	0	0	0	0	0.142241	0	0	0	0	0	0	0	0	0	0	0	0	0	0	0	0	0	0	0
lib230524_GGCTTTCCAATTGCCA-1	0	0.182313	0	0	0	0	0	0	0	0	0	0	0	0	0	0.163934	0	0.232975	0	0	0	0.232184	0	0	0	0	0	0	0	0.224138	0	0	0	0	0	0	0	0	0	0	0	0	0.182313	0	0	0	0	0	0
lib230524_GGGAAGTGTTGGGATG-1	0	0	0	0.0868687	0	0	0	0.120155	0	0	0	0	0	0	0	0	0	0.37276	0	0	0	0	0	0	0	0	0.0909091	0	0	0.215517	0	0	0	0	0	0	0	0	0	0	0	0	0	0.0868687	0	0.120155	0	0	0
lib230524_GGGACCTCAGAGTTGG-1	0	0	0	0	0	0	0	0	0	0	0	0	0	0	0	0	0	0.146953	0	0	0	0	0	0.711172	0	0	0	0	0	0.202586	0	0	0	0	0	0	0	0	0	1	0	0	0	0	0	0	0	0	0
lib230524_GGGAGATGTTGCTCGG-1	0	0	0	0	0	0	0	0	0	0	0	0	0	1	0	0	0	0	0	0	0	0	0	0	0	0	0	0	0	0	0	0	0	0	0	0	0	0	0	0	0	0	0	0	0	0	0	0	1
lib230524_GGGCCATTCCTAAACG-1	0	0	0	0	0	0	0.372093	0	0	0	0	0	0	0	0	0	0	0	0	0	0	0	0	0	0	0	0	0	0	0.336207	0	0	0	0	0	0	0	0	0	0	0	0	0	0	0	0.372093	0	0	0
lib230524_GGGCTACAGAAATTGC-1	0.0598639	0.122449	0	0.167677	0	0.413625	0	0	0	0	0	0.060686	0	0	0	0	0	0.390681	0	0.32197	0	0	0	0	0	0.47619	0	0	0	0.366379	0.141447	0	0	0	0	0.508772	0	0	0	0.585714	0	0	0.182313	0.167677	0.413625	0	0	0.060686	0
lib230524_GGGCTACTCTGTCGTC-1	0	0	0	0	0	0	0	0	0	0	0	0	0	1	0	0	0	0	0	0	0	0	0	0	0	0	0	0	0	0	0	0	0	0	0	0	0	0	0	0	0	0	0	0	0	0	0	0	1
lib230524_GGGTAGAGTATGAGCG-1	0	0	0	0	0	0	0	0	0	0	0	0	0	1	0	0	0	0	0	0	0	0	0	0	0	0	0	0	0	0	0	0	0	0	0	0	0	0	0	0	0	0	0	0	0	0	0	0	1
lib230524_GGGTAGAGTGCAACAG-1	0.0653061	0	0	0	0	0.124088	0	0.205426	0	0	0	0	0	0.884058	0	0.254098	0	0.444444	0	0.219697	0	0.114943	0	0	0	0	0.0988142	0	0	0	0	0	0.103529	0	0	0	0	0	0	0	0	0	0.0653061	0	0.124088	0.205426	0	0	0.884058
lib230524_GGGTCACCAGGTGTTT-1	0.0571429	0	0	0	0	0.145985	0	0.112403	0	0	0	0	0	0	0	0.188525	0	0	0	0	0	0.0827586	0	0	0	0	0	0	0	0.168103	0	0	0	0	0	0	0	0	0	0	0	0	0.0571429	0	0.145985	0.112403	0	0	0
lib230524_GGGTCACTCCTCATAT-1	0	0	0	0	0	0	0.372093	0	0	0	0	0	0	0	0	0	0	0	0	0	0	0	0	0	0	0	0	0	0	0.336207	0	0	0	0	0	0	0	0	0	0	0	0	0	0	0	0.372093	0	0	0
lib230524_GGGTGAAGTTGTCAGT-1	0	0	0	0	0	0	0	0	0	0	0	0	0	0	0	0	0	0.146953	0	0	0	0	0	0.711172	0	0	0	0	0	0.202586	0	0	0	0	0	0	0	0	0	1	0	0	0	0	0	0	0	0	0
lib230524_GGGTGTCTCCAAATGC-1	0	0	0	0	0	0	0	0	0	0	0	0	0	1	0	0	0	0	0	0	0	0	0	0	0	0	0	0	0	0	0	0	0	0	0	0	0	0	0	0	0	0	0	0	0	0	0	0	1
lib230524_GGGTTTAGTGAGCTCC-1	0	0.771429	0	0	0	0	0	0	0	0	0	0.110818	0	1	0	0	0	0	0	0	0	0	0	0.108992	0	0	0.12253	0	0	0	0	0	0	0	0	0	0	0	0	0	0	0	0.771429	0	0	0	0	0.110818	1
lib230524_GGGTTTATCCATAAGC-1	0.0653061	0	0	0	0	0.124088	0	0.205426	0	0	0	0	0	0.884058	0	0.254098	0	0.444444	0	0.219697	0	0.114943	0	0	0	0	0.0988142	0	0	0	0	0	0.103529	0	0	0	0	0	0	0	0	0	0.0653061	0	0.124088	0.205426	0	0	0.884058
lib230524_GGGTTTATCCTCTAGC-1	0	0	0	0	0	0	0	0	0	0	0	0	0	1	0	0	0	0	0	0	0	0	0	0	0	0	0	0	0	0	0	0	0	0	0	0	0	0	0	0	0	0	0	0	0	0	0	0	1
lib230524_GGTCACGGTATAATGG-1	0	0	0	0	0	0	0	0	0	0	0	0	0	0	0	0	0	0.146953	0	0	0	0	0	0.711172	0	0	0	0	0	0.202586	0	0	0	0	0	0	0	0	0	1	0	0	0	0	0	0	0	0	0
lib230524_GGTGGCTCATAGGAGC-1	0	0	0	0	0	0	0	0	0	0	0	0	0	0	0	0	0	0.480287	0	0	0	0.0988506	0	0.604905	0	0	0	0	0	0.142241	0	0	0	0	0	0	0	0	0	0	0	0	0	0	0	0	0	0	0
lib230524_GGTGGCTCATTGACAC-1	0	0	0	0	0	0	0	0	0	0	0	0	0	0	0	0	0	0.146953	0	0	0	0	0	0.711172	0	0	0	0	0	0.202586	0	0	0	0	0	0	0	0	0	1	0	0	0	0	0	0	0	0	0
lib230524_GGTGTCGAGCGGTAGT-1	0.0653061	0	0	0	0	0.124088	0	0.205426	0	0	0	0	0	0.884058	0	0.254098	0	0.444444	0	0.219697	0	0.114943	0	0	0	0	0.0988142	0	0	0	0	0	0.103529	0	0	0	0	0	0	0	0	0	0.0653061	0	0.124088	0.205426	0	0	0.884058
lib230524_GGTGTCGCAATGCTCA-1	0.0571429	0	0	0	0	0.145985	0	0.112403	0	0	0	0	0	0	0	0.188525	0	0	0	0	0	0.0827586	0	0	0	0	0	0	0	0.168103	0	0	0	0	0	0	0	0	0	0	0	0	0.0571429	0	0.145985	0.112403	0	0	0
lib230524_GGTGTCGCATGATGCT-1	0.0598639	0.122449	0	0.167677	0	0.413625	0	0	0	0	0	0.060686	0	0	0	0	0	0.390681	0	0.32197	0	0	0	0	0	0.47619	0	0	0	0.366379	0.141447	0	0	0	0	0.508772	0	0	0	0.585714	0	0	0.182313	0.167677	0.413625	0	0	0.060686	0
lib230524_GGTGTTATCAAGCCGC-1	0	0	0	0	0	0	0	0	0	0	0	0	0	1	0	0	0	0	0	0	0	0	0	0	0	0	0	0	0	0	0	0	0	0	0	0	0	0	0	0	0	0	0	0	0	0	0	0	1
lib230524_GGTGTTATCCCTCATG-1	0	0	0	0	0	0	0	0	0	0	0	0	0	0	0	0	0	0.146953	0	0	0	0	0	0.711172	0	0	0	0	0	0.202586	0	0	0	0	0	0	0	0	0	1	0	0	0	0	0	0	0	0	0
lib230524_GGTTAACGTCGATGCC-1	0	0	0	0	0	0	0	0	0	0	0	0	0	0	0	0	0	0.480287	0	0	0	0.0988506	0	0.604905	0	0	0	0	0	0.142241	0	0	0	0	0	0	0	0	0	0	0	0	0	0	0	0	0	0	0
lib230524_GGTTAACTCTCGCTCA-1	0	0	0	0	0	0	0	0	0	0	0	0	0	0	0	0	0	0	0	0	0	0	0	0	0	0	0	0	0	0	0	0	0	0	0	0	0	0	0	0	0	0	0	0	0	0	0	0	0
lib230524_GGTTCTCCAAGATGTA-1	0	0	0	0	0	0	0	0	0	0	0	0	0	0	0	0	0	0	0	0	0	0	0	0	0	0	0	0	0	0	0	0	0	0	0	0	0	0	0	0	0	0	0	0	0	0	0	0	0
lib230524_GGTTCTCCAGGTGTTT-1	0	0.771429	0	0	0	0	0	0	0	0	0	0.110818	0	1	0	0	0	0	0	0	0	0	0	0.108992	0	0	0.12253	0	0	0	0	0	0	0	0	0	0	0	0	0	0	0	0.771429	0	0	0	0	0.110818	1
lib230524_GGTTCTCGTTGCACGC-1	0	0	0	0	0	0	0	0	0	0	0	0	0	0	0	0	0	0.480287	0	0	0	0.0988506	0	0.604905	0	0	0	0	0	0.142241	0	0	0	0	0	0	0	0	0	0	0	0	0	0	0	0	0	0	0
lib230524_GGTTGTACAGCCGTCA-1	0	0	0	0	0	0	0	0	0	0	0	0	0	1	0	0	0	0	0	0	0	0	0	0	0	0	0	0	0	0	0	0	0	0	0	0	0	0	0	0	0	0	0	0	0	0	0	0	1
lib230524_GGTTGTATCAGAGTTC-1	0.0571429	0	0	0	0	0.145985	0	0.112403	0	0	0	0	0	0	0	0.188525	0	0	0	0	0	0.0827586	0	0	0	0	0	0	0	0.168103	0	0	0	0	0	0	0	0	0	0	0	0	0.0571429	0	0.145985	0.112403	0	0	0
lib230524_GTACAACCATGACGGA-1	0.0598639	0.122449	0	0.167677	0	0.413625	0	0	0	0	0	0.060686	0	0	0	0	0	0.390681	0	0.32197	0	0	0	0	0	0.47619	0	0	0	0.366379	0.141447	0	0	0	0	0.508772	0	0	0	0.585714	0	0	0.182313	0.167677	0.413625	0	0	0.060686	0
lib230524_GTACAGTAGGGACTGT-1	0	0	0	0	0	0	0	0	0	0	0	0	0	0	0	0	0	0	0	0	0	0	0	0	0	0	0	0	0	0	0	0	0	0	0	0	0	0	0	0	0	0	0	0	0	0	0	0	0
lib230524_GTACAGTGTGGTCAAG-1	0	0	0	0	0	0	0	0	0	0	0	0	0	0	0	0	0	0	0	0	0	0	0	0	0	0	0	0	0	0	0	0	0	0	0	0	0	0	0	0	0	0	0	0	0	0	0	0	0
lib230524_GTAGAGGAGCATGAAT-1	0	0	0	0	0	0	0	0	0	0	0	0	0	0	0	0	0	0.146953	0	0	0	0	0	0.711172	0	0	0	0	0	0.202586	0	0	0	0	0	0	0	0	0	1	0	0	0	0	0	0	0	0	0
lib230524_GTAGAGGCACGGCGTT-1	0	0	0	0.0868687	0	0	0	0.120155	0	0	0	0	0	0	0	0	0	0.37276	0	0	0	0	0	0	0	0	0.0909091	0	0	0.215517	0	0	0	0	0	0	0	0	0	0	0	0	0	0.0868687	0	0.120155	0	0	0
lib230524_GTAGAGGCAGTCACGC-1	0	0	0	0	0	0	0	0	0	0	0	0	0	1	0	0	0	0	0	0	0	0	0	0	0	0	0	0	0	0	0	0	0	0	0	0	0	0	0	0	0	0	0	0	0	0	0	0	1
lib230524_GTAGAGGTCTCTTGCG-1	0	0	0	0	0	0	0	0	0	0	0	0	0	0	0	0	0	0	0	0	0	0	0	0	0	0	0	0	0	0	0	0	0	0	0	0	0	0	0	0	0	0	0	0	0	0	0	0	0
lib230524_GTAGATCGTTATGTGC-1	0.0571429	0	0	0	0	0.145985	0	0.112403	0	0	0	0	0	0	0	0.188525	0	0	0	0	0	0.0827586	0	0	0	0	0	0	0	0.168103	0	0	0	0	0	0	0	0	0	0	0	0	0.0571429	0	0.145985	0.112403	0	0	0
lib230524_GTAGGAGTCATTATCC-1	0.0571429	0	0	0	0	0.145985	0	0.112403	0	0	0	0	0	0	0	0.188525	0	0	0	0	0	0.0827586	0	0	0	0	0	0	0	0.168103	0	0	0	0	0	0	0	0	0	0	0	0	0.0571429	0	0.145985	0.112403	0	0	0
lib230524_GTATTGGAGACCATTC-1	0.0571429	0	0	0	0	0.145985	0	0.112403	0	0	0	0	0	0	0	0.188525	0	0	0	0	0	0.0827586	0	0	0	0	0	0	0	0.168103	0	0	0	0	0	0	0	0	0	0	0	0	0.0571429	0	0.145985	0.112403	0	0	0
lib230524_GTCAAGTCACAAATGA-1	0	0	0	0	0	0	0	0	0	0	0	0	0	0	0	0	0	0	0	0	0	0	0	0	0	0	0	0	0	0	0	0	0	0	0	0	0	0	0	0	0	0	0	0	0	0	0	0	0
lib230524_GTCAAGTTCCTGATAG-1	0	0	0	0	0	0	0	0	0	0	0	0	0	0	0	0	0	0	0	0	0	0.101149	0	0	0	0	0	0	0	0.258621	0	0	0	0	0	0	0	0	0	0	0	0	0	0	0	0	0	0	0
lib230524_GTCAAGTTCGTGACTA-1	0	0	0	0	0	0	0	0	0	0	0	0	0	0	0	0	0	0.146953	0	0	0	0	0	0.711172	0	0	0	0	0	0.202586	0	0	0	0	0	0	0	0	0	1	0	0	0	0	0	0	0	0	0
lib230524_GTCACGGAGCAGTAAT-1	0	0	0	0.0868687	0	0	0	0.120155	0	0	0	0	0	0	0	0	0	0.37276	0	0	0	0	0	0	0	0	0.0909091	0	0	0.215517	0	0	0	0	0	0	0	0	0	0	0	0	0	0.0868687	0	0.120155	0	0	0
lib230524_GTCACGGTCGAAGCAG-1	0.0571429	0	0	0	0	0.145985	0	0.112403	0	0	0	0	0	0	0	0.188525	0	0	0	0	0	0.0827586	0	0	0	0	0	0	0	0.168103	0	0	0	0	0	0	0	0	0	0	0	0	0.0571429	0	0.145985	0.112403	0	0	0
lib230524_GTCACTCCAATGTGGG-1	0	0	0	0	0	0	0.372093	0	0	0	0	0	0	0	0	0	0	0	0	0	0	0	0	0	0	0	0	0	0	0.336207	0	0	0	0	0	0	0	0	0	0	0	0	0	0	0	0.372093	0	0	0
lib230524_GTCATCCAGGTAGTCG-1	0	0	0	0	0	0	0	0	0	0	0	0	0	1	0	0	0	0	0	0	0	0	0	0	0	0	0	0	0	0	0	0	0	0	0	0	0	0	0	0	0	0	0	0	0	0	0	0	1
lib230524_GTCATCCTCTTCTGGC-1	0.0598639	0.122449	0	0.167677	0	0.413625	0	0	0	0	0	0.060686	0	0	0	0	0	0.390681	0	0.32197	0	0	0	0	0	0.47619	0	0	0	0.366379	0.141447	0	0	0	0	0.508772	0	0	0	0.585714	0	0	0.182313	0.167677	0.413625	0	0	0.060686	0
lib230524_GTCATGAAGGGCGAGA-1	0	0	0	0	0	0	0	0	0	0	0	0	0	0	0	0	0	0	0	0	0	0	0	0	0	0	0	0	0	0	0	0	0	0	0	0	0	0	0	0	0	0	0	0	0	0	0	0	0
lib230524_GTCCACTGTTCACGAT-1	0	0.182313	0	0	0	0	0	0	0	0	0	0	0	0	0	0.163934	0	0.232975	0	0	0	0.232184	0	0	0	0	0	0	0	0.224138	0	0	0	0	0	0	0	0	0	0	0	0	0.182313	0	0	0	0	0	0
lib230524_GTCCCATGTACAGCGA-1	0.0653061	0	0	0	0	0.124088	0	0.205426	0	0	0	0	0	0.884058	0	0.254098	0	0.444444	0	0.219697	0	0.114943	0	0	0	0	0.0988142	0	0	0	0	0	0.103529	0	0	0	0	0	0	0	0	0	0.0653061	0	0.124088	0.205426	0	0	0.884058
lib230524_GTCCCATGTCGCTTAA-1	0	0	0	0	0	0	0	0	0	0	0	0	0	1	0	0	0	0	0	0	0	0	0	0	0	0	0	0	0	0	0	0	0	0	0	0	0	0	0	0	0	0	0	0	0	0	0	0	1
lib230524_GTCCTCAAGCAGCGAT-1	0	0	0	0	0	0	0	0	0	0	0	0	0	1	0	0	0	0	0	0	0	0	0	0	0	0	0	0	0	0	0	0	0	0	0	0	0	0	0	0	0	0	0	0	0	0	0	0	1
lib230524_GTCCTCACACGAAAGC-1	0	0.104762	0	0.109091	0	0	0	0.395349	0	0.27707	0	0	0	0	0	0	0	0	0	0	0	0	0	0	0	0.444444	0	0	0	0.219828	0	0	0	0	0	0	0	0	0	0	0	0	0.104762	0.109091	0	0.395349	0.27707	0	0
lib230524_GTCCTCATCGACCATA-1	0	0	0	0	0	0	0.372093	0	0	0	0	0	0	0	0	0	0	0	0	0	0	0	0	0	0	0	0	0	0	0.336207	0	0	0	0	0	0	0	0	0	0	0	0	0	0	0	0.372093	0	0	0
lib230524_GTCGAATCAGTAGAAT-1	0.0571429	0	0	0	0	0.145985	0	0.112403	0	0	0	0	0	0	0	0.188525	0	0	0	0	0	0.0827586	0	0	0	0	0	0	0	0.168103	0	0	0	0	0	0	0	0	0	0	0	0	0.0571429	0	0.145985	0.112403	0	0	0
lib230524_GTCGAATTCTCGCCTA-1	0	0	0	0	0	0	0	0	0	0	0	0	0	0	0	0	0	0.146953	0	0	0	0	0	0.711172	0	0	0	0	0	0.202586	0	0	0	0	0	0	0	0	0	1	0	0	0	0	0	0	0	0	0
lib230524_GTCGCGACAAGAGCTG-1	0	0.182313	0	0	0	0	0	0	0	0	0	0	0	0	0	0.163934	0	0.232975	0	0	0	0.232184	0	0	0	0	0	0	0	0.224138	0	0	0	0	0	0	0	0	0	0	0	0	0.182313	0	0	0	0	0	0
lib230524_GTCGCGAGTCCATCTC-1	0	0	0	0	0	0	0	0	0	0	0	0	0	1	0	0	0	0	0	0	0	0	0	0	0	0	0	0	0	0	0	0	0	0	0	0	0	0	0	0	0	0	0	0	0	0	0	0	1
lib230524_GTCGTTCCACATTGTG-1	0	0	0	0.0868687	0	0	0	0.120155	0	0	0	0	0	0	0	0	0	0.37276	0	0	0	0	0	0	0	0	0.0909091	0	0	0.215517	0	0	0	0	0	0	0	0	0	0	0	0	0	0.0868687	0	0.120155	0	0	0
lib230524_GTCGTTCGTGACTGAG-1	0	0	0	0.0868687	0	0	0	0.120155	0	0	0	0	0	0	0	0	0	0.37276	0	0	0	0	0	0	0	0	0.0909091	0	0	0.215517	0	0	0	0	0	0	0	0	0	0	0	0	0	0.0868687	0	0.120155	0	0	0
lib230524_GTCTCACGTCGCTTGG-1	0	0	0	0	0	0	0	0	0	0	0	0	0	0	0	0	0	0	0	0	0	0	0	0	0	0	0	0	0	0	0	0	0	0	0	0	0	0	0	0	0	0	0	0	0	0	0	0	0
lib230524_GTCTGTCTCAAATGAG-1	0.0598639	0.122449	0	0.167677	0	0.413625	0	0	0	0	0	0.060686	0	0	0	0	0	0.390681	0	0.32197	0	0	0	0	0	0.47619	0	0	0	0.366379	0.141447	0	0	0	0	0.508772	0	0	0	0.585714	0	0	0.182313	0.167677	0.413625	0	0	0.060686	0
lib230524_GTGACGCTCGACATCA-1	0	0	0	0	0	0	0	0	0	0	0	0	0	0	0	0	0	0	0	0	0	0	0	0	0	0	0	0	0	0	0	0	0	0	0	0	0	0	0	0	0	0	0	0	0	0	0	0	0
lib230524_GTGAGCCAGGTCCCGT-1	0.0571429	0	0	0	0	0.145985	0	0.112403	0	0	0	0	0	0	0	0.188525	0	0	0	0	0	0.0827586	0	0	0	0	0	0	0	0.168103	0	0	0	0	0	0	0	0	0	0	0	0	0.0571429	0	0.145985	0.112403	0	0	0
lib230524_GTGCAGCTCGTTCCTG-1	0	0	0	0	0	0	0	0	0	0	0	0	0	0	0	0	0	0	0	0	0	0.101149	0	0	0	0	0	0	0	0.258621	0	0	0	0	0	0	0	0	0	0	0	0	0	0	0	0	0	0	0
lib230524_GTGCAGCTCTCTCCGA-1	0	0	0	0	0	0	0	0	0	0	0	0	0	1	0	0	0	0	0	0	0	0	0	0	0	0	0	0	0	0	0	0	0	0	0	0	0	0	0	0	0	0	0	0	0	0	0	0	1
lib230524_GTGCTTCTCTCGGTAA-1	0	0	0	0	0	0	0	0	0	0	0	0	0	0	0	0	0	0	0	0	0	0	0	0	0	0	0	0	0	0	0	0	0	0	0	0	0	0	0	0	0	0	0	0	0	0	0	0	0
lib230524_GTGGAGAGTGTTAGCT-1	0	0	0	0	0	0	0	0	0	0	0	0	0	1	0	0	0	0	0	0	0	0	0	0	0	0	0	0	0	0	0	0	0	0	0	0	0	0	0	0	0	0	0	0	0	0	0	0	1
lib230524_GTGTAACCAGGCTCTG-1	0	0	0	0	0	0	0	0	0	0	0	0	0	1	0	0	0	0	0	0	0	0	0	0	0	0	0	0	0	0	0	0	0	0	0	0	0	0	0	0	0	0	0	0	0	0	0	0	1
lib230524_GTGTGATAGTCACTAC-1	0	0	0	0	0	0	0.372093	0	0	0	0	0	0	0	0	0	0	0	0	0	0	0	0	0	0	0	0	0	0	0.336207	0	0	0	0	0	0	0	0	0	0	0	0	0	0	0	0.372093	0	0	0
lib230524_GTGTTAGGTCCAGAAG-1	0	0	0	0.0868687	0	0	0	0.120155	0	0	0	0	0	0	0	0	0	0.37276	0	0	0	0	0	0	0	0	0.0909091	0	0	0.215517	0	0	0	0	0	0	0	0	0	0	0	0	0	0.0868687	0	0.120155	0	0	0
lib230524_GTTACCCTCCGACGGT-1	0.0598639	0.122449	0	0.167677	0	0.413625	0	0	0	0	0	0.060686	0	0	0	0	0	0.390681	0	0.32197	0	0	0	0	0	0.47619	0	0	0	0.366379	0.141447	0	0	0	0	0.508772	0	0	0	0.585714	0	0	0.182313	0.167677	0.413625	0	0	0.060686	0
lib230524_GTTACGACACACGTGC-1	0.0571429	0	0	0	0	0.145985	0	0.112403	0	0	0	0	0	0	0	0.188525	0	0	0	0	0	0.0827586	0	0	0	0	0	0	0	0.168103	0	0	0	0	0	0	0	0	0	0	0	0	0.0571429	0	0.145985	0.112403	0	0	0
lib230524_GTTACGACACTAGGCC-1	0	0.167347	0	0	0	0	0	0.162791	0	0	0	0	0	0	0	0.188525	0	0.129032	0	0	0	0	0	0	0	0	0	0	0	0	0	0	0	0.251765	0	0	0	0	0	0	0	0	0.167347	0	0	0.162791	0	0	0
lib230524_GTTCATTAGCTATCCA-1	0	0	0	0	0	0	0	0	0	0	0	0	0	1	0	0	0	0	0	0	0	0	0	0	0	0	0	0	0	0	0	0	0	0	0	0	0	0	0	0	0	0	0	0	0	0	0	0	1
lib230524_GTTCATTCAGATCCAT-1	0.0598639	0.122449	0	0.167677	0	0.413625	0	0	0	0	0	0.060686	0	0	0	0	0	0.390681	0	0.32197	0	0	0	0	0	0.47619	0	0	0	0.366379	0.141447	0	0	0	0	0.508772	0	0	0	0.585714	0	0	0.182313	0.167677	0.413625	0	0	0.060686	0
lib230524_GTTCATTTCGGTCAGC-1	0	0	0	0	0	0	0	0	0	0	0	0	0	0	0	0	0	0.146953	0	0	0	0	0	0.711172	0	0	0	0	0	0.202586	0	0	0	0	0	0	0	0	0	1	0	0	0	0	0	0	0	0	0
lib230524_GTTCCGTCAGATTCGT-1	0	0	0	0	0	0	0	0	0	0	0	0	0	0	0	0	0	0.480287	0	0	0	0.0988506	0	0.604905	0	0	0	0	0	0.142241	0	0	0	0	0	0	0	0	0	0	0	0	0	0	0	0	0	0	0
lib230524_GTTCGCTCACTTGTGA-1	0	0	0	0	0	0	0	0	0	0	0	0	0	0	0	0	0	0.146953	0	0	0	0	0	0.711172	0	0	0	0	0	0.202586	0	0	0	0	0	0	0	0	0	1	0	0	0	0	0	0	0	0	0
lib230524_GTTGAACAGAGCCATG-1	0	0	0	0.0868687	0	0	0	0.120155	0	0	0	0	0	0	0	0	0	0.37276	0	0	0	0	0	0	0	0	0.0909091	0	0	0.215517	0	0	0	0	0	0	0	0	0	0	0	0	0	0.0868687	0	0.120155	0	0	0
lib230524_GTTGCTCTCATAGAGA-1	0.0571429	0	0	0	0	0.145985	0	0.112403	0	0	0	0	0	0	0	0.188525	0	0	0	0	0	0.0827586	0	0	0	0	0	0	0	0.168103	0	0	0	0	0	0	0	0	0	0	0	0	0.0571429	0	0.145985	0.112403	0	0	0
lib230524_GTTGTCCCAAAGACTA-1	0.0571429	0	0	0	0	0.145985	0	0.112403	0	0	0	0	0	0	0	0.188525	0	0	0	0	0	0.0827586	0	0	0	0	0	0	0	0.168103	0	0	0	0	0	0	0	0	0	0	0	0	0.0571429	0	0.145985	0.112403	0	0	0
lib230524_GTTGTGATCTGAGAAA-1	0	0	0	0	0	0	0.372093	0	0	0	0	0	0	0	0	0	0	0	0	0	0	0	0	0	0	0	0	0	0	0.336207	0	0	0	0	0	0	0	0	0	0	0	0	0	0	0	0.372093	0	0	0
lib230524_GTTTACTAGCCATTCA-1	0	0	0	0	0	0	0.372093	0	0	0	0	0	0	0	0	0	0	0	0	0	0	0	0	0	0	0	0	0	0	0.336207	0	0	0	0	0	0	0	0	0	0	0	0	0	0	0	0.372093	0	0	0
lib230524_GTTTGGACAGGCGTTC-1	0	0	0	0.0888889	0	0.270073	0.666667	0	0	0.0764331	0	0	0	0.884058	0	0.721311	0.422939	0	0	0.496212	0.328736	0.250575	0	0	0	0	0	0.189723	0	0.474138	0	0	0	0.185882	0	0.280702	0	0	0	0	0	0	0	0.0888889	0.270073	0.666667	0.0764331	0	0.884058
lib230524_GTTTGGATCCCTTTGG-1	0.0571429	0	0	0	0	0.145985	0	0.112403	0	0	0	0	0	0	0	0.188525	0	0	0	0	0	0.0827586	0	0	0	0	0	0	0	0.168103	0	0	0	0	0	0	0	0	0	0	0	0	0.0571429	0	0.145985	0.112403	0	0	0
lib230524_TAACACGGTTCCTAGA-1	0	0	0	0	0	0	0	0	0	0	0	0	0	1	0	0	0	0	0	0	0	0	0	0	0	0	0	0	0	0	0	0	0	0	0	0	0	0	0	0	0	0	0	0	0	0	0	0	1
lib230524_TAACGACAGTTCCATG-1	0	0	0	0	0	0	0	0	0	0	0	0	0	0	0	0	0	0.146953	0	0	0	0	0	0.711172	0	0	0	0	0	0.202586	0	0	0	0	0	0	0	0	0	1	0	0	0	0	0	0	0	0	0
lib230524_TAACGACTCTGAGAGG-1	0	0	0	0.0868687	0	0	0	0.120155	0	0	0	0	0	0	0	0	0	0.37276	0	0	0	0	0	0	0	0	0.0909091	0	0	0.215517	0	0	0	0	0	0	0	0	0	0	0	0	0	0.0868687	0	0.120155	0	0	0
lib230524_TAAGCACAGCATTTGC-1	0	0	0	0	0	0	0	0	0	0	0	0	0	1	0	0	0	0	0	0	0	0	0	0	0	0	0	0	0	0	0	0	0	0	0	0	0	0	0	0	0	0	0	0	0	0	0	0	1
lib230524_TAAGCCAGTGTAGTGG-1	0.0653061	0	0	0	0	0.124088	0	0.205426	0	0	0	0	0	0.884058	0	0.254098	0	0.444444	0	0.219697	0	0.114943	0	0	0	0	0.0988142	0	0	0	0	0	0.103529	0	0	0	0	0	0	0	0	0	0.0653061	0	0.124088	0.205426	0	0	0.884058
lib230524_TAAGCGTCAGACACAG-1	0	0	0	0	0	0	0	0	0	0	0	0	0	0	0	0	0	0	0	0	0	0.101149	0	0	0	0	0	0	0	0.258621	0	0	0	0	0	0	0	0	0	0	0	0	0	0	0	0	0	0	0
lib230524_TAAGCGTTCTCTCAAT-1	0	0	0	0	0	0	0	0	0	0	0	0	0	0	0	0	0	0	0	0	0	0	0	0	0	0	0	0	0	0	0	0	0	0	0	0	0	0	0	0	0	0	0	0	0	0	0	0	0
lib230524_TAAGTCGCAATTCACG-1	0	0	0	0.0868687	0	0	0	0.120155	0	0	0	0	0	0	0	0	0	0.37276	0	0	0	0	0	0	0	0	0.0909091	0	0	0.215517	0	0	0	0	0	0	0	0	0	0	0	0	0	0.0868687	0	0.120155	0	0	0
lib230524_TAATCTCAGAGTCCGA-1	0	0.182313	0	0	0	0	0	0	0	0	0	0	0	0	0	0.163934	0	0.232975	0	0	0	0.232184	0	0	0	0	0	0	0	0.224138	0	0	0	0	0	0	0	0	0	0	0	0	0.182313	0	0	0	0	0	0
lib230524_TAATCTCAGGTACCTT-1	0	0	0	0	0	0	0.372093	0	0	0	0	0	0	0	0	0	0	0	0	0	0	0	0	0	0	0	0	0	0	0.336207	0	0	0	0	0	0	0	0	0	0	0	0	0	0	0	0.372093	0	0	0
lib230524_TAATTCCCAGCAGGAT-1	0	0	0	0	0	0	0	0	0	0	0	0	0	1	0	0	0	0	0	0	0	0	0	0	0	0	0	0	0	0	0	0	0	0	0	0	0	0	0	0	0	0	0	0	0	0	0	0	1
lib230524_TACAACGAGGTAAGAG-1	0	0	0	0	0	0	0	0	0	0	0	0	0	0	0	0	0	0	0	0	0	0	0	0	0	0	0	0	0	0	0	0	0	0	0	0	0	0	0	0	0	0	0	0	0	0	0	0	0
lib230524_TACAACGCATGGGTCC-1	0	0	0	0	0	0	0	0	0	0	0	0	0	0	0	0	0	0	0	0	0	0	0	0	0	0	0	0	0	0	0	0	0	0	0	0	0	0	0	0	0	0	0	0	0	0	0	0	0
lib230524_TACAACGTCTTCTGGC-1	0.0571429	0	0	0	0	0.145985	0	0.112403	0	0	0	0	0	0	0	0.188525	0	0	0	0	0	0.0827586	0	0	0	0	0	0	0	0.168103	0	0	0	0	0	0	0	0	0	0	0	0	0.0571429	0	0.145985	0.112403	0	0	0
lib230524_TACACCCTCGGCTGAC-1	0	0	0	0	0	0	0	0	0	0	0	0	0	0	0	0	0	0	0	0	0	0.101149	0	0	0	0	0	0	0	0.258621	0	0	0	0	0	0	0	0	0	0	0	0	0	0	0	0	0	0	0
lib230524_TACCCGTTCTGCATGA-1	0	0	0	0	0	0	0	0	0	0	0	0	0	0	0	0	0	0.146953	0	0	0	0	0	0.711172	0	0	0	0	0	0.202586	0	0	0	0	0	0	0	0	0	1	0	0	0	0	0	0	0	0	0
lib230524_TACCGAAAGGGTATAT-1	0	0.182313	0	0	0	0	0	0	0	0	0	0	0	0	0	0.163934	0	0.232975	0	0	0	0.232184	0	0	0	0	0	0	0	0.224138	0	0	0	0	0	0	0	0	0	0	0	0	0.182313	0	0	0	0	0	0
lib230524_TACCGAACAACCAATC-1	0	0	0	0	0	0	0	0	0	0	0	0	0	0	0	0	0	0.146953	0	0	0	0	0	0.711172	0	0	0	0	0	0.202586	0	0	0	0	0	0	0	0	0	1	0	0	0	0	0	0	0	0	0
lib230524_TACGCTCCATCAACCA-1	0	0	0	0	0	0	0	0	0	0	0	0	0	0	0	0	0	0.146953	0	0	0	0	0	0.711172	0	0	0	0	0	0.202586	0	0	0	0	0	0	0	0	0	1	0	0	0	0	0	0	0	0	0
lib230524_TACGCTCCATGACGAG-1	0	0	0	0	0	0	0	0	0	0	0	0	0	0	0	0	0	0	0	0	0	0	0	0	0	0	0	0	0	0	0	0	0	0	0	0	0	0	0	0	0	0	0	0	0	0	0	0	0
lib230524_TACGGGCAGCTAGCCC-1	0	0	0	0	0	0	0	0	0	0	0	0	0	0	0	0	0	0.480287	0	0	0	0.0988506	0	0.604905	0	0	0	0	0	0.142241	0	0	0	0	0	0	0	0	0	0	0	0	0	0	0	0	0	0	0
lib230524_TACGGGCGTGCGGATA-1	0.111565	0.160544	0.141414	0.474747	0.124088	0	0	0.666667	0.493631	0	0	0.113456	0	0.150725	0.254098	0.184426	0.243728	0.519713	0.136364	0.227273	0.202299	0.324138	0.405995	0	0.404762	0.484127	0.0434783	0.853755	0	0.422414	0.118421	0.467105	0.136471	0	0	1	0	0.412935	0	1	0.469136	0	0.272109	0.616162	0.124088	0.666667	0.493631	0.113456	0.150725
lib230524_TACGGTATCCGCCTAT-1	0	0.771429	0	0	0	0	0	0	0	0	0	0.110818	0	1	0	0	0	0	0	0	0	0	0	0.108992	0	0	0.12253	0	0	0	0	0	0	0	0	0	0	0	0	0	0	0	0.771429	0	0	0	0	0.110818	1
lib230524_TACGTCCCATTGAGCT-1	0	0	0	0	0	0	0.372093	0	0	0	0	0	0	0	0	0	0	0	0	0	0	0	0	0	0	0	0	0	0	0.336207	0	0	0	0	0	0	0	0	0	0	0	0	0	0	0	0.372093	0	0	0
lib230524_TACGTCCTCAAATAGG-1	0	0	0	0	0	0	0.372093	0	0	0	0	0	0	0	0	0	0	0	0	0	0	0	0	0	0	0	0	0	0	0.336207	0	0	0	0	0	0	0	0	0	0	0	0	0	0	0	0.372093	0	0	0
lib230524_TACGTCCTCCACTTTA-1	0	0.167347	0	0	0	0	0	0.162791	0	0	0	0	0	0	0	0.188525	0	0.129032	0	0	0	0	0	0	0	0	0	0	0	0	0	0	0	0.251765	0	0	0	0	0	0	0	0	0.167347	0	0	0.162791	0	0	0
lib230524_TACGTCCTCGCCTATC-1	0	0	0	0.0868687	0	0	0	0.120155	0	0	0	0	0	0	0	0	0	0.37276	0	0	0	0	0	0	0	0	0.0909091	0	0	0.215517	0	0	0	0	0	0	0	0	0	0	0	0	0	0.0868687	0	0.120155	0	0	0
lib230524_TACGTCCTCTACCCAC-1	0	0	0	0	0	0	0	0	0	0	0	0	0	0	0	0	0	0.480287	0	0	0	0.0988506	0	0.604905	0	0	0	0	0	0.142241	0	0	0	0	0	0	0	0	0	0	0	0	0	0	0	0	0	0	0
lib230524_TACTGCCAGTCACTGT-1	0	0	0	0.0868687	0	0	0	0.120155	0	0	0	0	0	0	0	0	0	0.37276	0	0	0	0	0	0	0	0	0.0909091	0	0	0.215517	0	0	0	0	0	0	0	0	0	0	0	0	0	0.0868687	0	0.120155	0	0	0
lib230524_TACTGCCTCGCCAACG-1	0	0	0	0	0	0	0	0	0	0	0	0	0	1	0	0	0	0	0	0	0	0	0	0	0	0	0	0	0	0	0	0	0	0	0	0	0	0	0	0	0	0	0	0	0	0	0	0	1
lib230524_TACTTCATCGTGCGAC-1	0.0571429	0	0	0	0	0.145985	0	0.112403	0	0	0	0	0	0	0	0.188525	0	0	0	0	0	0.0827586	0	0	0	0	0	0	0	0.168103	0	0	0	0	0	0	0	0	0	0	0	0	0.0571429	0	0.145985	0.112403	0	0	0
lib230524_TACTTGTAGTCTAGAA-1	0	0	0	0	0	0	0.372093	0	0	0	0	0	0	0	0	0	0	0	0	0	0	0	0	0	0	0	0	0	0	0.336207	0	0	0	0	0	0	0	0	0	0	0	0	0	0	0	0.372093	0	0	0
lib230524_TAGAGTCTCGATCCCT-1	0	0	0	0	0	0	0	0	0	0	0	0	0	0	0	0	0	0.480287	0	0	0	0.0988506	0	0.604905	0	0	0	0	0	0.142241	0	0	0	0	0	0	0	0	0	0	0	0	0	0	0	0	0	0	0
lib230524_TAGATCGCACATACGT-1	0.0598639	0.122449	0	0.167677	0	0.413625	0	0	0	0	0	0.060686	0	0	0	0	0	0.390681	0	0.32197	0	0	0	0	0	0.47619	0	0	0	0.366379	0.141447	0	0	0	0	0.508772	0	0	0	0.585714	0	0	0.182313	0.167677	0.413625	0	0	0.060686	0
lib230524_TAGCACAGTCCGGTGT-1	0	0	0	0	0	0	0	0	0	0	0	0	0	1	0	0	0	0	0	0	0	0	0	0	0	0	0	0	0	0	0	0	0	0	0	0	0	0	0	0	0	0	0	0	0	0	0	0	1
lib230524_TAGGAGGTCATCAGTG-1	0.0571429	0	0	0	0	0.145985	0	0.112403	0	0	0	0	0	0	0	0.188525	0	0	0	0	0	0.0827586	0	0	0	0	0	0	0	0.168103	0	0	0	0	0	0	0	0	0	0	0	0	0.0571429	0	0.145985	0.112403	0	0	0
lib230524_TAGGTACAGGTTCTAC-1	0	0	0	0	0	0	0	0	0	0	0	0	0	0	0	0	0	0.480287	0	0	0	0.0988506	0	0.604905	0	0	0	0	0	0.142241	0	0	0	0	0	0	0	0	0	0	0	0	0	0	0	0	0	0	0
lib230524_TAGGTACGTGAGGAAA-1	0	0	0	0	0	0	0	0	0	0	0	0	0	0	0	0	0	0	0	0	0	0.101149	0	0	0	0	0	0	0	0.258621	0	0	0	0	0	0	0	0	0	0	0	0	0	0	0	0	0	0	0
lib230524_TAGGTTGAGCACTTTG-1	0	0	0	0.0868687	0	0	0	0.120155	0	0	0	0	0	0	0	0	0	0.37276	0	0	0	0	0	0	0	0	0.0909091	0	0	0.215517	0	0	0	0	0	0	0	0	0	0	0	0	0	0.0868687	0	0.120155	0	0	0
lib230524_TAGTGCAGTTACCTGA-1	0.0571429	0	0	0	0	0.145985	0	0.112403	0	0	0	0	0	0	0	0.188525	0	0	0	0	0	0.0827586	0	0	0	0	0	0	0	0.168103	0	0	0	0	0	0	0	0	0	0	0	0	0.0571429	0	0.145985	0.112403	0	0	0
lib230524_TATACCTAGGATTACA-1	0	0	0	0	0	0	0	0	0	0	0	0	0	0	0	0	0	0	0	0	0	0.101149	0	0	0	0	0	0	0	0.258621	0	0	0	0	0	0	0	0	0	0	0	0	0	0	0	0	0	0	0
lib230524_TATACCTAGGCTCTAT-1	0	0	0	0.0868687	0	0	0	0.120155	0	0	0	0	0	0	0	0	0	0.37276	0	0	0	0	0	0	0	0	0.0909091	0	0	0.215517	0	0	0	0	0	0	0	0	0	0	0	0	0	0.0868687	0	0.120155	0	0	0
lib230524_TATCAGGAGGAGAGGC-1	0	0	0	0	0	0	0.372093	0	0	0	0	0	0	0	0	0	0	0	0	0	0	0	0	0	0	0	0	0	0	0.336207	0	0	0	0	0	0	0	0	0	0	0	0	0	0	0	0.372093	0	0	0
lib230524_TATCCTACACTGATTG-1	0.0653061	0	0	0	0	0.124088	0	0.205426	0	0	0	0	0	0.884058	0	0.254098	0	0.444444	0	0.219697	0	0.114943	0	0	0	0	0.0988142	0	0	0	0	0	0.103529	0	0	0	0	0	0	0	0	0	0.0653061	0	0.124088	0.205426	0	0	0.884058
lib230524_TATCCTACAGTTACCA-1	0	0	0	0	0	0	0	0	0	0	0	0	0	0	0	0	0	0	0	0	0	0	0	0	0	0	0	0	0	0	0	0	0	0	0	0	0	0	0	0	0	0	0	0	0	0	0	0	0
lib230524_TATCTGTCAGACAATA-1	0	0	0	0	0	0	0	0	0	0	0	0	0	0	0	0	0	0	0	0	0	0	0	0	0	0	0	0	0	0	0	0	0	0	0	0	0	0	0	0	0	0	0	0	0	0	0	0	0
lib230524_TATCTGTCATGACTAC-1	0	0	0	0.0868687	0	0	0	0.120155	0	0	0	0	0	0	0	0	0	0.37276	0	0	0	0	0	0	0	0	0.0909091	0	0	0.215517	0	0	0	0	0	0	0	0	0	0	0	0	0	0.0868687	0	0.120155	0	0	0
lib230524_TATCTGTTCCCTCGAT-1	0	0	0	0.0868687	0	0	0	0.120155	0	0	0	0	0	0	0	0	0	0.37276	0	0	0	0	0	0	0	0	0.0909091	0	0	0.215517	0	0	0	0	0	0	0	0	0	0	0	0	0	0.0868687	0	0.120155	0	0	0
lib230524_TATGTTCAGACCTTTG-1	0	0	0	0	0	0	0.372093	0	0	0	0	0	0	0	0	0	0	0	0	0	0	0	0	0	0	0	0	0	0	0.336207	0	0	0	0	0	0	0	0	0	0	0	0	0	0	0	0.372093	0	0	0
lib230524_TATTGCTAGCCTGACC-1	0	0	0	0.0868687	0	0	0	0.120155	0	0	0	0	0	0	0	0	0	0.37276	0	0	0	0	0	0	0	0	0.0909091	0	0	0.215517	0	0	0	0	0	0	0	0	0	0	0	0	0	0.0868687	0	0.120155	0	0	0
lib230524_TATTGGGAGTGGTGAC-1	0	0	0	0	0	0	0	0	0	0	0	0	0	0	0	0	0	0	0	0	0	0	0	0	0	0	0	0	0	0	0	0	0	0	0	0	0	0	0	0	0	0	0	0	0	0	0	0	0
lib230524_TATTGGGCAGCTTTGA-1	0	0	0	0	0	0	0	0	0	0	0	0	0	0	0	0	0	0	0	0	0	0.101149	0	0	0	0	0	0	0	0.258621	0	0	0	0	0	0	0	0	0	0	0	0	0	0	0	0	0	0	0
lib230524_TATTTCGGTGTTCCTC-1	0	0.182313	0	0	0	0	0	0	0	0	0	0	0	0	0	0.163934	0	0.232975	0	0	0	0.232184	0	0	0	0	0	0	0	0.224138	0	0	0	0	0	0	0	0	0	0	0	0	0.182313	0	0	0	0	0	0
lib230524_TCAAGCACAGCTGAAG-1	0	0	0	0	0	0	0	0	0	0	0	0	0	1	0	0	0	0	0	0	0	0	0	0	0	0	0	0	0	0	0	0	0	0	0	0	0	0	0	0	0	0	0	0	0	0	0	0	1
lib230524_TCAATCTCACCAAATC-1	0	0.182313	0	0	0	0	0	0	0	0	0	0	0	0	0	0.163934	0	0.232975	0	0	0	0.232184	0	0	0	0	0	0	0	0.224138	0	0	0	0	0	0	0	0	0	0	0	0	0.182313	0	0	0	0	0	0
lib230524_TCAATTCAGGGATCAC-1	0	0	0	0	0	0	0	0	0	0	0	0	0	0	0	0	0	0	0	0	0	0.101149	0	0	0	0	0	0	0	0.258621	0	0	0	0	0	0	0	0	0	0	0	0	0	0	0	0	0	0	0
lib230524_TCAATTCCAAGGCCTC-1	0.0571429	0	0	0	0	0.145985	0	0.112403	0	0	0	0	0	0	0	0.188525	0	0	0	0	0	0.0827586	0	0	0	0	0	0	0	0.168103	0	0	0	0	0	0	0	0	0	0	0	0	0.0571429	0	0.145985	0.112403	0	0	0
lib230524_TCAATTCTCGCGTCGA-1	0	0	0	0	0	0	0	0	0	0	0	0	0	0	0	0	0	0	0	0	0	0.101149	0	0	0	0	0	0	0	0.258621	0	0	0	0	0	0	0	0	0	0	0	0	0	0	0	0	0	0	0
lib230524_TCACATTGTATCGCAT-1	0	0	0	0	0	0	0	0	0	0	0	0	0	0	0	0	0	0.146953	0	0	0	0	0	0.711172	0	0	0	0	0	0.202586	0	0	0	0	0	0	0	0	0	1	0	0	0	0	0	0	0	0	0
lib230524_TCACGGGAGCATCAAA-1	0.0653061	0	0	0	0	0.124088	0	0.205426	0	0	0	0	0	0.884058	0	0.254098	0	0.444444	0	0.219697	0	0.114943	0	0	0	0	0.0988142	0	0	0	0	0	0.103529	0	0	0	0	0	0	0	0	0	0.0653061	0	0.124088	0.205426	0	0	0.884058
lib230524_TCACTATAGACTCGAG-1	0	0	0	0	0	0	0	0	0	0	0	0	0	0	0	0	0	0	0	0	0	0	0	0	0	0	0	0	0	0	0	0	0	0	0	0	0	0	0	0	0	0	0	0	0	0	0	0	0
lib230524_TCAGGTACATCTGGGC-1	0	0	0	0	0	0	0.372093	0	0	0	0	0	0	0	0	0	0	0	0	0	0	0	0	0	0	0	0	0	0	0.336207	0	0	0	0	0	0	0	0	0	0	0	0	0	0	0	0.372093	0	0	0
lib230524_TCAGTCCAGTCATGCT-1	0.0598639	0.122449	0	0.167677	0	0.413625	0	0	0	0	0	0.060686	0	0	0	0	0	0.390681	0	0.32197	0	0	0	0	0	0.47619	0	0	0	0.366379	0.141447	0	0	0	0	0.508772	0	0	0	0.585714	0	0	0.182313	0.167677	0.413625	0	0	0.060686	0
lib230524_TCAGTCCGTCTTCTAT-1	0.0598639	0.122449	0	0.167677	0	0.413625	0	0	0	0	0	0.060686	0	0	0	0	0	0.390681	0	0.32197	0	0	0	0	0	0.47619	0	0	0	0.366379	0.141447	0	0	0	0	0.508772	0	0	0	0.585714	0	0	0.182313	0.167677	0.413625	0	0	0.060686	0
lib230524_TCAGTGACACCCTGAG-1	0	0	0	0	0	0	0.372093	0	0	0	0	0	0	0	0	0	0	0	0	0	0	0	0	0	0	0	0	0	0	0.336207	0	0	0	0	0	0	0	0	0	0	0	0	0	0	0	0.372093	0	0	0
lib230524_TCAGTTTAGGGCAATC-1	0.0653061	0	0	0	0	0.124088	0	0.205426	0	0	0	0	0	0.884058	0	0.254098	0	0.444444	0	0.219697	0	0.114943	0	0	0	0	0.0988142	0	0	0	0	0	0.103529	0	0	0	0	0	0	0	0	0	0.0653061	0	0.124088	0.205426	0	0	0.884058
lib230524_TCATACTAGGATCATA-1	0	0	0	0	0	0	0	0	0	0	0	0	0	1	0	0	0	0	0	0	0	0	0	0	0	0	0	0	0	0	0	0	0	0	0	0	0	0	0	0	0	0	0	0	0	0	0	0	1
lib230524_TCATACTGTTCAGTAC-1	0.0653061	0	0	0	0	0.124088	0	0.205426	0	0	0	0	0	0.884058	0	0.254098	0	0.444444	0	0.219697	0	0.114943	0	0	0	0	0.0988142	0	0	0	0	0	0.103529	0	0	0	0	0	0	0	0	0	0.0653061	0	0.124088	0.205426	0	0	0.884058
lib230524_TCATATCTCAAGATAG-1	0	0	0	0.0868687	0	0	0	0.120155	0	0	0	0	0	0	0	0	0	0.37276	0	0	0	0	0	0	0	0	0.0909091	0	0	0.215517	0	0	0	0	0	0	0	0	0	0	0	0	0	0.0868687	0	0.120155	0	0	0
lib230524_TCATCATCACGGTGAA-1	0	0	0	0	0	0	0	0	0	0	0	0	0	0	0	0	0	0	0	0	0	0.101149	0	0	0	0	0	0	0	0.258621	0	0	0	0	0	0	0	0	0	0	0	0	0	0	0	0	0	0	0
lib230524_TCATCATGTGGAACAC-1	0	0	0	0.0868687	0	0	0	0.120155	0	0	0	0	0	0	0	0	0	0.37276	0	0	0	0	0	0	0	0	0.0909091	0	0	0.215517	0	0	0	0	0	0	0	0	0	0	0	0	0	0.0868687	0	0.120155	0	0	0
lib230524_TCATCCGAGGACTATA-1	0.0653061	0	0	0	0	0.124088	0	0.205426	0	0	0	0	0	0.884058	0	0.254098	0	0.444444	0	0.219697	0	0.114943	0	0	0	0	0.0988142	0	0	0	0	0	0.103529	0	0	0	0	0	0	0	0	0	0.0653061	0	0.124088	0.205426	0	0	0.884058
lib230524_TCATCCGCAGACAATA-1	0	0	0	0	0	0	0	0	0	0	0	0	0	0	0	0	0	0	0	0	0	0	0	0	0	0	0	0	0	0	0	0	0	0	0	0	0	0	0	0	0	0	0	0	0	0	0	0	0
lib230524_TCATGAGCATAGGCGA-1	0	0	0	0	0	0	0	0	0	0	0	0	0	0	0	0	0	0	0	0	0	0.101149	0	0	0	0	0	0	0	0.258621	0	0	0	0	0	0	0	0	0	0	0	0	0	0	0	0	0	0	0
lib230524_TCATGAGGTTAGTCGT-1	0	0	0	0	0	0	0	0	0	0	0	0	0	1	0	0	0	0	0	0	0	0	0	0	0	0	0	0	0	0	0	0	0	0	0	0	0	0	0	0	0	0	0	0	0	0	0	0	1
lib230524_TCATTCAAGCAAATGT-1	0	0	0	0	0	0	0	0	0	0	0	0	0	0	0	0	0	0	0	0	0	0.101149	0	0	0	0	0	0	0	0.258621	0	0	0	0	0	0	0	0	0	0	0	0	0	0	0	0	0	0	0
lib230524_TCATTGTAGTTAGTGA-1	0	0.182313	0	0	0	0	0	0	0	0	0	0	0	0	0	0.163934	0	0.232975	0	0	0	0.232184	0	0	0	0	0	0	0	0.224138	0	0	0	0	0	0	0	0	0	0	0	0	0.182313	0	0	0	0	0	0
lib230524_TCATTGTCACAACATC-1	0	0	0	0	0	0	0	0	0	0	0	0	0	1	0	0	0	0	0	0	0	0	0	0	0	0	0	0	0	0	0	0	0	0	0	0	0	0	0	0	0	0	0	0	0	0	0	0	1
lib230524_TCATTGTCACTTGACA-1	0	0	0	0	0	0	0	0	0	0	0	0	0	1	0	0	0	0	0	0	0	0	0	0	0	0	0	0	0	0	0	0	0	0	0	0	0	0	0	0	0	0	0	0	0	0	0	0	1
lib230524_TCATTGTCATGAATAG-1	0.0571429	0	0	0	0	0.145985	0	0.112403	0	0	0	0	0	0	0	0.188525	0	0	0	0	0	0.0827586	0	0	0	0	0	0	0	0.168103	0	0	0	0	0	0	0	0	0	0	0	0	0.0571429	0	0.145985	0.112403	0	0	0
lib230524_TCCACCAGTCAGGTGA-1	0	0	0	0	0	0	0	0	0	0	0	0	0	0	0	0	0	0	0	0	0	0.101149	0	0	0	0	0	0	0	0.258621	0	0	0	0	0	0	0	0	0	0	0	0	0	0	0	0	0	0	0
lib230524_TCCACGTCATCGATCA-1	0	0.182313	0	0	0	0	0	0	0	0	0	0	0	0	0	0.163934	0	0.232975	0	0	0	0.232184	0	0	0	0	0	0	0	0.224138	0	0	0	0	0	0	0	0	0	0	0	0	0.182313	0	0	0	0	0	0
lib230524_TCCATGCCATGACTAC-1	0.0571429	0	0	0	0	0.145985	0	0.112403	0	0	0	0	0	0	0	0.188525	0	0	0	0	0	0.0827586	0	0	0	0	0	0	0	0.168103	0	0	0	0	0	0	0	0	0	0	0	0	0.0571429	0	0.145985	0.112403	0	0	0
lib230524_TCCATGCTCATCGCCT-1	0	0	0	0	0	0	0	0	0	0	0	0	0	1	0	0	0	0	0	0	0	0	0	0	0	0	0	0	0	0	0	0	0	0	0	0	0	0	0	0	0	0	0	0	0	0	0	0	1
lib230524_TCCCACAAGATCGCTT-1	0	0	0	0	0	0	0	0	0	0	0	0	0	0	0	0	0	0	0	0	0	0.101149	0	0	0	0	0	0	0	0.258621	0	0	0	0	0	0	0	0	0	0	0	0	0	0	0	0	0	0	0
lib230524_TCCCAGTAGGTACAGC-1	0	0	0	0	0	0	0	0	0	0	0	0	0	1	0	0	0	0	0	0	0	0	0	0	0	0	0	0	0	0	0	0	0	0	0	0	0	0	0	0	0	0	0	0	0	0	0	0	1
lib230524_TCCCAGTCAGACGGAT-1	0	0	0	0	0	0	0	0	0	0	0	0	0	0	0	0	0	0	0	0	0	0	0	0	0	0	0	0	0	0	0	0	0	0	0	0	0	0	0	0	0	0	0	0	0	0	0	0	0
lib230524_TCCCAGTGTTTCGTTT-1	0	0	0	0	0	0	0	0	0	0	0	0	0	0	0	0	0	0.480287	0	0	0	0.0988506	0	0.604905	0	0	0	0	0	0.142241	0	0	0	0	0	0	0	0	0	0	0	0	0	0	0	0	0	0	0
lib230524_TCCCATGCACAGTACT-1	0	0	0	0	0	0	0	0	0	0	0	0	0	0	0	0	0	0	0	0	0	0.101149	0	0	0	0	0	0	0	0.258621	0	0	0	0	0	0	0	0	0	0	0	0	0	0	0	0	0	0	0
lib230524_TCCCATGTCACACCGG-1	0	0	0	0	0	0	0.372093	0	0	0	0	0	0	0	0	0	0	0	0	0	0	0	0	0	0	0	0	0	0	0.336207	0	0	0	0	0	0	0	0	0	0	0	0	0	0	0	0.372093	0	0	0
lib230524_TCCGAAAGTTCTTCAT-1	0	0	0	0	0	0	0.372093	0	0	0	0	0	0	0	0	0	0	0	0	0	0	0	0	0	0	0	0	0	0	0.336207	0	0	0	0	0	0	0	0	0	0	0	0	0	0	0	0.372093	0	0	0
lib230524_TCCGATCCAGCAGAAC-1	0.0571429	0	0	0	0	0.145985	0	0.112403	0	0	0	0	0	0	0	0.188525	0	0	0	0	0	0.0827586	0	0	0	0	0	0	0	0.168103	0	0	0	0	0	0	0	0	0	0	0	0	0.0571429	0	0.145985	0.112403	0	0	0
lib230524_TCCGATCTCCCTCTTT-1	0	0	0	0	0	0	0	0	0	0	0	0	0	0	0	0	0	0	0	0	0	0	0	0	0	0	0	0	0	0	0	0	0	0	0	0	0	0	0	0	0	0	0	0	0	0	0	0	0
lib230524_TCCGATCTCGGAAGGT-1	0	0	0	0	0	0	0	0	0	0	0	0	0	0	0	0	0	0.480287	0	0	0	0.0988506	0	0.604905	0	0	0	0	0	0.142241	0	0	0	0	0	0	0	0	0	0	0	0	0	0	0	0	0	0	0
lib230524_TCCGGGACACTTGAAC-1	0	0	0	0.0868687	0	0	0	0.120155	0	0	0	0	0	0	0	0	0	0.37276	0	0	0	0	0	0	0	0	0.0909091	0	0	0.215517	0	0	0	0	0	0	0	0	0	0	0	0	0	0.0868687	0	0.120155	0	0	0
lib230524_TCCTAATAGCCAAGTG-1	0	0	0	0.0868687	0	0	0	0.120155	0	0	0	0	0	0	0	0	0	0.37276	0	0	0	0	0	0	0	0	0.0909091	0	0	0.215517	0	0	0	0	0	0	0	0	0	0	0	0	0	0.0868687	0	0.120155	0	0	0
lib230524_TCCTCCCGTAGGAGTC-1	0	0.182313	0	0	0	0	0	0	0	0	0	0	0	0	0	0.163934	0	0.232975	0	0	0	0.232184	0	0	0	0	0	0	0	0.224138	0	0	0	0	0	0	0	0	0	0	0	0	0.182313	0	0	0	0	0	0
lib230524_TCCTCCCGTCGATGCC-1	0	0	0	0	0	0	0	0	0	0	0	0	0	1	0	0	0	0	0	0	0	0	0	0	0	0	0	0	0	0	0	0	0	0	0	0	0	0	0	0	0	0	0	0	0	0	0	0	1
lib230524_TCCTCGAAGTTTGTCG-1	0	0	0	0	0	0	0	0	0	0	0	0	0	1	0	0	0	0	0	0	0	0	0	0	0	0	0	0	0	0	0	0	0	0	0	0	0	0	0	0	0	0	0	0	0	0	0	0	1
lib230524_TCCTCGACAGCCATTA-1	0	0	0	0	0	0	0.372093	0	0	0	0	0	0	0	0	0	0	0	0	0	0	0	0	0	0	0	0	0	0	0.336207	0	0	0	0	0	0	0	0	0	0	0	0	0	0	0	0.372093	0	0	0
lib230524_TCCTCGAGTTCCACGG-1	0.0598639	0.122449	0	0.167677	0	0.413625	0	0	0	0	0	0.060686	0	0	0	0	0	0.390681	0	0.32197	0	0	0	0	0	0.47619	0	0	0	0.366379	0.141447	0	0	0	0	0.508772	0	0	0	0.585714	0	0	0.182313	0.167677	0.413625	0	0	0.060686	0
lib230524_TCCTCTTGTGAGTAAT-1	0	0	0	0.0868687	0	0	0	0.120155	0	0	0	0	0	0	0	0	0	0.37276	0	0	0	0	0	0	0	0	0.0909091	0	0	0.215517	0	0	0	0	0	0	0	0	0	0	0	0	0	0.0868687	0	0.120155	0	0	0
lib230524_TCCTCTTTCCGTCACT-1	0	0	0	0	0	0	0	0	0	0	0	0	0	1	0	0	0	0	0	0	0	0	0	0	0	0	0	0	0	0	0	0	0	0	0	0	0	0	0	0	0	0	0	0	0	0	0	0	1
lib230524_TCCTGCAGTGCCTTTC-1	0	0	0	0	0	0	0	0	0	0	0	0	0	0	0	0	0	0.146953	0	0	0	0	0	0.711172	0	0	0	0	0	0.202586	0	0	0	0	0	0	0	0	0	1	0	0	0	0	0	0	0	0	0
lib230524_TCCTTCTGTGAACGGT-1	0	0	0	0	0	0	0	0	0	0	0	0	0	0	0	0	0	0.146953	0	0	0	0	0	0.711172	0	0	0	0	0	0.202586	0	0	0	0	0	0	0	0	0	1	0	0	0	0	0	0	0	0	0
lib230524_TCCTTTCGTATCGAAA-1	0.0571429	0	0	0	0	0.145985	0	0.112403	0	0	0	0	0	0	0	0.188525	0	0	0	0	0	0.0827586	0	0	0	0	0	0	0	0.168103	0	0	0	0	0	0	0	0	0	0	0	0	0.0571429	0	0.145985	0.112403	0	0	0
lib230524_TCGAACAGTCATCGGC-1	0	0	0	0	0	0	0	0	0	0	0	0	0	0	0	0	0	0	0	0	0	0.101149	0	0	0	0	0	0	0	0.258621	0	0	0	0	0	0	0	0	0	0	0	0	0	0	0	0	0	0	0
lib230524_TCGAACATCTATACTC-1	0	0	0	0	0	0	0	0	0	0	0	0	0	0	0	0	0	0	0	0	0	0.101149	0	0	0	0	0	0	0	0.258621	0	0	0	0	0	0	0	0	0	0	0	0	0	0	0	0	0	0	0
lib230524_TCGAAGTCAGTTTCAG-1	0	0	0	0	0	0	0	0	0	0	0	0	0	0	0	0	0	0.146953	0	0	0	0	0	0.711172	0	0	0	0	0	0.202586	0	0	0	0	0	0	0	0	0	1	0	0	0	0	0	0	0	0	0
lib230524_TCGAAGTTCTGGCCTT-1	0	0	0	0	0	0	0	0	0	0	0	0	0	1	0	0	0	0	0	0	0	0	0	0	0	0	0	0	0	0	0	0	0	0	0	0	0	0	0	0	0	0	0	0	0	0	0	0	1
lib230524_TCGACCTGTGAACGGT-1	0	0	0	0	0	0	0.372093	0	0	0	0	0	0	0	0	0	0	0	0	0	0	0	0	0	0	0	0	0	0	0.336207	0	0	0	0	0	0	0	0	0	0	0	0	0	0	0	0.372093	0	0	0
lib230524_TCGACGGTCTAGTACG-1	0	0	0	0.0868687	0	0	0	0.120155	0	0	0	0	0	0	0	0	0	0.37276	0	0	0	0	0	0	0	0	0.0909091	0	0	0.215517	0	0	0	0	0	0	0	0	0	0	0	0	0	0.0868687	0	0.120155	0	0	0
lib230524_TCGATTTCACCGTGAC-1	0	0	0	0	0	0	0	0	0	0	0	0	0	0	0	0	0	0	0	0	0	0.101149	0	0	0	0	0	0	0	0.258621	0	0	0	0	0	0	0	0	0	0	0	0	0	0	0	0	0	0	0
lib230524_TCGCAGGCAGTCTCTC-1	0	0	0	0	0	0	0	0	0	0	0	0	0	0	0	0	0	0.146953	0	0	0	0	0	0.711172	0	0	0	0	0	0.202586	0	0	0	0	0	0	0	0	0	1	0	0	0	0	0	0	0	0	0
lib230524_TCGCTCATCATCCTGC-1	0	0	0	0	0	0	0	0	0	0	0	0	0	1	0	0	0	0	0	0	0	0	0	0	0	0	0	0	0	0	0	0	0	0	0	0	0	0	0	0	0	0	0	0	0	0	0	0	1
lib230524_TCGCTTGCAAAGGAGA-1	0	0	0	0.0868687	0	0	0	0.120155	0	0	0	0	0	0	0	0	0	0.37276	0	0	0	0	0	0	0	0	0.0909091	0	0	0.215517	0	0	0	0	0	0	0	0	0	0	0	0	0	0.0868687	0	0.120155	0	0	0
lib230524_TCGGATACATCCGATA-1	0	0	0	0	0	0	0	0	0	0	0	0	0	1	0	0	0	0	0	0	0	0	0	0	0	0	0	0	0	0	0	0	0	0	0	0	0	0	0	0	0	0	0	0	0	0	0	0	1
lib230524_TCGGATAGTCCACACG-1	0.0653061	0	0	0	0	0.124088	0	0.205426	0	0	0	0	0	0.884058	0	0.254098	0	0.444444	0	0.219697	0	0.114943	0	0	0	0	0.0988142	0	0	0	0	0	0.103529	0	0	0	0	0	0	0	0	0	0.0653061	0	0.124088	0.205426	0	0	0.884058
lib230524_TCGGGCACAACACACT-1	0	0	0	0	0	0	0	0	0	0	0	0	0	0	0	0	0	0	0	0	0	0	0	0	0	0	0	0	0	0	0	0	0	0	0	0	0	0	0	0	0	0	0	0	0	0	0	0	0
lib230524_TCGGGTGCATAATGAG-1	0	0	0	0	0	0	0	0	0	0	0	0	0	1	0	0	0	0	0	0	0	0	0	0	0	0	0	0	0	0	0	0	0	0	0	0	0	0	0	0	0	0	0	0	0	0	0	0	1
lib230524_TCGGTCTGTGTGTCCG-1	0	0	0	0	0	0	0.372093	0	0	0	0	0	0	0	0	0	0	0	0	0	0	0	0	0	0	0	0	0	0	0.336207	0	0	0	0	0	0	0	0	0	0	0	0	0	0	0	0.372093	0	0	0
lib230524_TCGTCCAGTTGCATGT-1	0.0571429	0	0	0	0	0.145985	0	0.112403	0	0	0	0	0	0	0	0.188525	0	0	0	0	0	0.0827586	0	0	0	0	0	0	0	0.168103	0	0	0	0	0	0	0	0	0	0	0	0	0.0571429	0	0.145985	0.112403	0	0	0
lib230524_TCTAACTGTCATCTAG-1	0.0598639	0.122449	0	0.167677	0	0.413625	0	0	0	0	0	0.060686	0	0	0	0	0	0.390681	0	0.32197	0	0	0	0	0	0.47619	0	0	0	0.366379	0.141447	0	0	0	0	0.508772	0	0	0	0.585714	0	0	0.182313	0.167677	0.413625	0	0	0.060686	0
lib230524_TCTACATGTGATCATC-1	0.0571429	0	0	0	0	0.145985	0	0.112403	0	0	0	0	0	0	0	0.188525	0	0	0	0	0	0.0827586	0	0	0	0	0	0	0	0.168103	0	0	0	0	0	0	0	0	0	0	0	0	0.0571429	0	0.145985	0.112403	0	0	0
lib230524_TCTATACGTGGCAACA-1	0	0	0	0	0	0	0.372093	0	0	0	0	0	0	0	0	0	0	0	0	0	0	0	0	0	0	0	0	0	0	0.336207	0	0	0	0	0	0	0	0	0	0	0	0	0	0	0	0.372093	0	0	0
lib230524_TCTATACTCCATAGAC-1	0	0.167347	0	0	0	0	0	0.162791	0	0	0	0	0	0	0	0.188525	0	0.129032	0	0	0	0	0	0	0	0	0	0	0	0	0	0	0	0.251765	0	0	0	0	0	0	0	0	0.167347	0	0	0.162791	0	0	0
lib230524_TCTATCAAGCCATTTG-1	0	0	0	0	0	0	0	0	0	0	0	0	0	0	0	0	0	0.480287	0	0	0	0.0988506	0	0.604905	0	0	0	0	0	0.142241	0	0	0	0	0	0	0	0	0	0	0	0	0	0	0	0	0	0	0
lib230524_TCTCTGGTCTCCAATT-1	0	0	0	0.0868687	0	0	0	0.120155	0	0	0	0	0	0	0	0	0	0.37276	0	0	0	0	0	0	0	0	0.0909091	0	0	0.215517	0	0	0	0	0	0	0	0	0	0	0	0	0	0.0868687	0	0.120155	0	0	0
lib230524_TCTGCCACATTCTCTA-1	0	0	0	0	0	0	0	0	0	0	0	0	0	1	0	0	0	0	0	0	0	0	0	0	0	0	0	0	0	0	0	0	0	0	0	0	0	0	0	0	0	0	0	0	0	0	0	0	1
lib230524_TCTGGCTAGGTCCCTG-1	0.0598639	0.122449	0	0.167677	0	0.413625	0	0	0	0	0	0.060686	0	0	0	0	0	0.390681	0	0.32197	0	0	0	0	0	0.47619	0	0	0	0.366379	0.141447	0	0	0	0	0.508772	0	0	0	0.585714	0	0	0.182313	0.167677	0.413625	0	0	0.060686	0
lib230524_TCTGTCGCACATACTG-1	0	0	0	0	0	0	0	0	0	0	0	0	0	0	0	0	0	0	0	0	0	0	0	0	0	0	0	0	0	0	0	0	0	0	0	0	0	0	0	0	0	0	0	0	0	0	0	0	0
lib230524_TCTGTCGCACTCCGGA-1	0	0	0	0	0	0	0	0	0	0	0	0	0	1	0	0	0	0	0	0	0	0	0	0	0	0	0	0	0	0	0	0	0	0	0	0	0	0	0	0	0	0	0	0	0	0	0	0	1
lib230524_TCTGTCGCAGCCTATA-1	0	0	0	0	0	0	0	0	0	0	0	0	0	0	0	0	0	0.146953	0	0	0	0	0	0.711172	0	0	0	0	0	0.202586	0	0	0	0	0	0	0	0	0	1	0	0	0	0	0	0	0	0	0
lib230524_TCTTGCGCACGCTTAA-1	0	0.104762	0	0.109091	0	0	0	0.395349	0	0.27707	0	0	0	0	0	0	0	0	0	0	0	0	0	0	0	0.444444	0	0	0	0.219828	0	0	0	0	0	0	0	0	0	0	0	0	0.104762	0.109091	0	0.395349	0.27707	0	0
lib230524_TCTTGCGGTCGCTTAA-1	0	0	0	0	0	0	0.372093	0	0	0	0	0	0	0	0	0	0	0	0	0	0	0	0	0	0	0	0	0	0	0.336207	0	0	0	0	0	0	0	0	0	0	0	0	0	0	0	0.372093	0	0	0
lib230524_TCTTTGAAGCCTTCTC-1	0	0	0	0.0868687	0	0	0	0.120155	0	0	0	0	0	0	0	0	0	0.37276	0	0	0	0	0	0	0	0	0.0909091	0	0	0.215517	0	0	0	0	0	0	0	0	0	0	0	0	0	0.0868687	0	0.120155	0	0	0
lib230524_TGAACGTAGTTTCGAC-1	0	0	0	0	0	0	0	0	0	0	0	0	0	1	0	0	0	0	0	0	0	0	0	0	0	0	0	0	0	0	0	0	0	0	0	0	0	0	0	0	0	0	0	0	0	0	0	0	1
lib230524_TGAACGTTCGGCCCAA-1	0	0	0	0	0	0	0	0	0	0	0	0	0	1	0	0	0	0	0	0	0	0	0	0	0	0	0	0	0	0	0	0	0	0	0	0	0	0	0	0	0	0	0	0	0	0	0	0	1
lib230524_TGAACGTTCGGTCATA-1	0	0	0	0.0868687	0	0	0	0.120155	0	0	0	0	0	0	0	0	0	0.37276	0	0	0	0	0	0	0	0	0.0909091	0	0	0.215517	0	0	0	0	0	0	0	0	0	0	0	0	0	0.0868687	0	0.120155	0	0	0
lib230524_TGAATGCCACGGCACT-1	0.0653061	0	0	0	0	0.124088	0	0.205426	0	0	0	0	0	0.884058	0	0.254098	0	0.444444	0	0.219697	0	0.114943	0	0	0	0	0.0988142	0	0	0	0	0	0.103529	0	0	0	0	0	0	0	0	0	0.0653061	0	0.124088	0.205426	0	0	0.884058
lib230524_TGACAGTGTTCTTAGG-1	0	0	0	0	0	0	0	0	0	0	0	0	0	0	0	0	0	0	0	0	0	0.101149	0	0	0	0	0	0	0	0.258621	0	0	0	0	0	0	0	0	0	0	0	0	0	0	0	0	0	0	0
lib230524_TGACAGTTCCTACGGG-1	0.0598639	0.122449	0	0.167677	0	0.413625	0	0	0	0	0	0.060686	0	0	0	0	0	0.390681	0	0.32197	0	0	0	0	0	0.47619	0	0	0	0.366379	0.141447	0	0	0	0	0.508772	0	0	0	0.585714	0	0	0.182313	0.167677	0.413625	0	0	0.060686	0
lib230524_TGACCCTTCCGGGACT-1	0	0	0	0	0	0	0	0	0	0	0	0	0	0	0	0	0	0	0	0	0	0	0	0	0	0	0	0	0	0	0	0	0	0	0	0	0	0	0	0	0	0	0	0	0	0	0	0	0
lib230524_TGACGCGCATCCAACA-1	0	0	0	0	0	0	0	0	0	0	0	0	0	0	0	0	0	0	0	0	0	0.101149	0	0	0	0	0	0	0	0.258621	0	0	0	0	0	0	0	0	0	0	0	0	0	0	0	0	0	0	0
lib230524_TGACTCCCAATGAGCG-1	0	0	0	0	0	0	0	0	0	0	0	0	0	0	0	0	0	0.480287	0	0	0	0.0988506	0	0.604905	0	0	0	0	0	0.142241	0	0	0	0	0	0	0	0	0	0	0	0	0	0	0	0	0	0	0
lib230524_TGAGACTCAATGCTCA-1	0	0.182313	0	0	0	0	0	0	0	0	0	0	0	0	0	0.163934	0	0.232975	0	0	0	0.232184	0	0	0	0	0	0	0	0.224138	0	0	0	0	0	0	0	0	0	0	0	0	0.182313	0	0	0	0	0	0
lib230524_TGAGACTCATCGGAGA-1	0	0	0	0.0868687	0	0	0	0.120155	0	0	0	0	0	0	0	0	0	0.37276	0	0	0	0	0	0	0	0	0.0909091	0	0	0.215517	0	0	0	0	0	0	0	0	0	0	0	0	0	0.0868687	0	0.120155	0	0	0
lib230524_TGAGACTGTCTCGGAC-1	0	0	0	0	0	0	0.372093	0	0	0	0	0	0	0	0	0	0	0	0	0	0	0	0	0	0	0	0	0	0	0.336207	0	0	0	0	0	0	0	0	0	0	0	0	0	0	0	0.372093	0	0	0
lib230524_TGAGACTTCCTACCAC-1	0.0571429	0	0	0	0	0.145985	0	0.112403	0	0	0	0	0	0	0	0.188525	0	0	0	0	0	0.0827586	0	0	0	0	0	0	0	0.168103	0	0	0	0	0	0	0	0	0	0	0	0	0.0571429	0	0.145985	0.112403	0	0	0
lib230524_TGAGCGCAGCCTGACC-1	0	0	0	0	0	0	0.372093	0	0	0	0	0	0	0	0	0	0	0	0	0	0	0	0	0	0	0	0	0	0	0.336207	0	0	0	0	0	0	0	0	0	0	0	0	0	0	0	0.372093	0	0	0
lib230524_TGAGCGCTCCGGACTG-1	0	0	0	0	0	0	0	0	0	0	0	0	0	0	0	0	0	0.146953	0	0	0	0	0	0.711172	0	0	0	0	0	0.202586	0	0	0	0	0	0	0	0	0	1	0	0	0	0	0	0	0	0	0
lib230524_TGAGCGCTCGACCAAT-1	0	0	0	0	0	0	0	0	0	0	0	0	0	0	0	0	0	0.146953	0	0	0	0	0	0.711172	0	0	0	0	0	0.202586	0	0	0	0	0	0	0	0	0	1	0	0	0	0	0	0	0	0	0
lib230524_TGAGGAGCAGACGGAT-1	0	0	0	0	0	0	0	0	0	0	0	0	0	0	0	0	0	0	0	0	0	0.101149	0	0	0	0	0	0	0	0.258621	0	0	0	0	0	0	0	0	0	0	0	0	0	0	0	0	0	0	0
lib230524_TGAGGGAAGGCTTAAA-1	0	0	0	0	0	0	0	0	0	0	0	0	0	1	0	0	0	0	0	0	0	0	0	0	0	0	0	0	0	0	0	0	0	0	0	0	0	0	0	0	0	0	0	0	0	0	0	0	1
lib230524_TGAGGGACATAGATCC-1	0	0	0	0	0	0	0	0	0	0	0	0	0	1	0	0	0	0	0	0	0	0	0	0	0	0	0	0	0	0	0	0	0	0	0	0	0	0	0	0	0	0	0	0	0	0	0	0	1
lib230524_TGAGGGATCTTTGATC-1	0	0	0	0	0	0	0	0	0	0	0	0	0	0	0	0	0	0	0	0	0	0.101149	0	0	0	0	0	0	0	0.258621	0	0	0	0	0	0	0	0	0	0	0	0	0	0	0	0	0	0	0
lib230524_TGATCAGGTGTCTTCC-1	0.0571429	0	0	0	0	0.145985	0	0.112403	0	0	0	0	0	0	0	0.188525	0	0	0	0	0	0.0827586	0	0	0	0	0	0	0	0.168103	0	0	0	0	0	0	0	0	0	0	0	0	0.0571429	0	0.145985	0.112403	0	0	0
lib230524_TGATCTTAGCAAACAT-1	0.0571429	0	0	0	0	0.145985	0	0.112403	0	0	0	0	0	0	0	0.188525	0	0	0	0	0	0.0827586	0	0	0	0	0	0	0	0.168103	0	0	0	0	0	0	0	0	0	0	0	0	0.0571429	0	0.145985	0.112403	0	0	0
lib230524_TGATCTTCAGTATTCG-1	0	0	0	0	0	0	0	0	0	0	0	0	0	1	0	0	0	0	0	0	0	0	0	0	0	0	0	0	0	0	0	0	0	0	0	0	0	0	0	0	0	0	0	0	0	0	0	0	1
lib230524_TGATCTTTCGGTAGGA-1	0	0	0	0	0	0	0	0	0	0	0	0	0	1	0	0	0	0	0	0	0	0	0	0	0	0	0	0	0	0	0	0	0	0	0	0	0	0	0	0	0	0	0	0	0	0	0	0	1
lib230524_TGATGCAAGCACACCC-1	0	0	0	0	0	0	0	0	0	0	0	0	0	0	0	0	0	0.146953	0	0	0	0	0	0.711172	0	0	0	0	0	0.202586	0	0	0	0	0	0	0	0	0	1	0	0	0	0	0	0	0	0	0
lib230524_TGATGCACATCATCCC-1	0	0	0	0	0	0	0	0	0	0	0	0	0	0	0	0	0	0	0	0	0	0	0	0	0	0	0	0	0	0	0	0	0	0	0	0	0	0	0	0	0	0	0	0	0	0	0	0	0
lib230524_TGATGGTTCCACTGAA-1	0	0	0	0	0	0	0	0	0	0	0	0	0	0	0	0	0	0	0	0	0	0	0	0	0	0	0	0	0	0	0	0	0	0	0	0	0	0	0	0	0	0	0	0	0	0	0	0	0
lib230524_TGATTCTAGCTGCCTG-1	0.0571429	0	0	0	0	0.145985	0	0.112403	0	0	0	0	0	0	0	0.188525	0	0	0	0	0	0.0827586	0	0	0	0	0	0	0	0.168103	0	0	0	0	0	0	0	0	0	0	0	0	0.0571429	0	0.145985	0.112403	0	0	0
lib230524_TGATTTCCACAGTGTT-1	0	0	0	0	0	0	0	0	0	0	0	0	0	0	0	0	0	0.480287	0	0	0	0.0988506	0	0.604905	0	0	0	0	0	0.142241	0	0	0	0	0	0	0	0	0	0	0	0	0	0	0	0	0	0	0
lib230524_TGCAGATCAATCCTTT-1	0	0	0	0	0	0	0	0	0	0	0	0	0	1	0	0	0	0	0	0	0	0	0	0	0	0	0	0	0	0	0	0	0	0	0	0	0	0	0	0	0	0	0	0	0	0	0	0	1
lib230524_TGCAGGCCAAGAGATT-1	0	0	0	0	0	0	0	0	0	0	0	0	0	0	0	0	0	0	0	0	0	0.101149	0	0	0	0	0	0	0	0.258621	0	0	0	0	0	0	0	0	0	0	0	0	0	0	0	0	0	0	0
lib230524_TGCAGTATCCCGTTCA-1	0	0	0	0	0	0	0	0	0	0	0	0	0	0	0	0	0	0	0	0	0	0.101149	0	0	0	0	0	0	0	0.258621	0	0	0	0	0	0	0	0	0	0	0	0	0	0	0	0	0	0	0
lib230524_TGCCGAGAGAACTCCT-1	0	0	0	0	0	0	0	0	0	0	0	0	0	0	0	0	0	0	0	0	0	0.101149	0	0	0	0	0	0	0	0.258621	0	0	0	0	0	0	0	0	0	0	0	0	0	0	0	0	0	0	0
lib230524_TGCGACGGTGAGGCAT-1	0	0	0	0	0	0	0	0	0	0	0	0	0	0	0	0	0	0	0	0	0	0.101149	0	0	0	0	0	0	0	0.258621	0	0	0	0	0	0	0	0	0	0	0	0	0	0	0	0	0	0	0
lib230524_TGGAACTCATGACGAG-1	0	0	0	0	0	0	0	0	0	0	0	0	0	1	0	0	0	0	0	0	0	0	0	0	0	0	0	0	0	0	0	0	0	0	0	0	0	0	0	0	0	0	0	0	0	0	0	0	1
lib230524_TGGAACTTCGGTCTGG-1	0	0	0	0	0	0	0	0	0	0	0	0	0	0	0	0	0	0	0	0	0	0	0	0	0	0	0	0	0	0	0	0	0	0	0	0	0	0	0	0	0	0	0	0	0	0	0	0	0
lib230524_TGGAGAGAGCACTCGC-1	0	0	0	0	0	0	0	0	0	0	0	0	0	0	0	0	0	0	0	0	0	0.101149	0	0	0	0	0	0	0	0.258621	0	0	0	0	0	0	0	0	0	0	0	0	0	0	0	0	0	0	0
lib230524_TGGAGGAAGGCAGCTA-1	0	0	0	0.0868687	0	0	0	0.120155	0	0	0	0	0	0	0	0	0	0.37276	0	0	0	0	0	0	0	0	0.0909091	0	0	0.215517	0	0	0	0	0	0	0	0	0	0	0	0	0	0.0868687	0	0.120155	0	0	0
lib230524_TGGATCAGTAGGTGCA-1	0	0	0	0	0	0	0	0	0	0	0	0	0	0	0	0	0	0.480287	0	0	0	0.0988506	0	0.604905	0	0	0	0	0	0.142241	0	0	0	0	0	0	0	0	0	0	0	0	0	0	0	0	0	0	0
lib230524_TGGATCATCCTCACGT-1	0	0	0	0	0	0	0	0	0	0	0	0	0	1	0	0	0	0	0	0	0	0	0	0	0	0	0	0	0	0	0	0	0	0	0	0	0	0	0	0	0	0	0	0	0	0	0	0	1
lib230524_TGGATGTCATCCCACT-1	0	0	0	0	0	0	0	0	0	0	0	0	0	0	0	0	0	0	0	0	0	0	0	0	0	0	0	0	0	0	0	0	0	0	0	0	0	0	0	0	0	0	0	0	0	0	0	0	0
lib230524_TGGCGTGGTCCAGTTA-1	0	0.167347	0	0	0	0	0	0.162791	0	0	0	0	0	0	0	0.188525	0	0.129032	0	0	0	0	0	0	0	0	0	0	0	0	0	0	0	0.251765	0	0	0	0	0	0	0	0	0.167347	0	0	0.162791	0	0	0
lib230524_TGGGATTTCACCGACG-1	0	0	0	0	0	0	0	0	0	0	0	0	0	0	0	0	0	0	0	0	0	0	0	0	0	0	0	0	0	0	0	0	0	0	0	0	0	0	0	0	0	0	0	0	0	0	0	0	0
lib230524_TGGTGATGTTTATGCG-1	0.0653061	0	0	0	0	0.124088	0	0.205426	0	0	0	0	0	0.884058	0	0.254098	0	0.444444	0	0.219697	0	0.114943	0	0	0	0	0.0988142	0	0	0	0	0	0.103529	0	0	0	0	0	0	0	0	0	0.0653061	0	0.124088	0.205426	0	0	0.884058
lib230524_TGTAACGAGATGAACT-1	0	0	0	0	0	0	0	0	0	0	0	0	0	1	0	0	0	0	0	0	0	0	0	0	0	0	0	0	0	0	0	0	0	0	0	0	0	0	0	0	0	0	0	0	0	0	0	0	1
lib230524_TGTAACGAGTTTAGGA-1	0	0	0	0.0868687	0	0	0	0.120155	0	0	0	0	0	0	0	0	0	0.37276	0	0	0	0	0	0	0	0	0.0909091	0	0	0.215517	0	0	0	0	0	0	0	0	0	0	0	0	0	0.0868687	0	0.120155	0	0	0
lib230524_TGTACAGCACTACACA-1	0	0	0	0	0	0	0.372093	0	0	0	0	0	0	0	0	0	0	0	0	0	0	0	0	0	0	0	0	0	0	0.336207	0	0	0	0	0	0	0	0	0	0	0	0	0	0	0	0.372093	0	0	0
lib230524_TGTCAGACAATGCTCA-1	0.0653061	0	0	0	0	0.124088	0	0.205426	0	0	0	0	0	0.884058	0	0.254098	0	0.444444	0	0.219697	0	0.114943	0	0	0	0	0.0988142	0	0	0	0	0	0.103529	0	0	0	0	0	0	0	0	0	0.0653061	0	0.124088	0.205426	0	0	0.884058
lib230524_TGTCAGACAGTACTAC-1	0	0	0	0	0	0	0	0	0	0	0	0	0	0	0	0	0	0.146953	0	0	0	0	0	0.711172	0	0	0	0	0	0.202586	0	0	0	0	0	0	0	0	0	1	0	0	0	0	0	0	0	0	0
lib230524_TGTCCACAGCATGCAG-1	0	0	0	0	0	0	0.372093	0	0	0	0	0	0	0	0	0	0	0	0	0	0	0	0	0	0	0	0	0	0	0.336207	0	0	0	0	0	0	0	0	0	0	0	0	0	0	0	0.372093	0	0	0
lib230524_TGTCCACAGTAGCCAG-1	0	0	0	0	0	0	0	0	0	0	0	0	0	1	0	0	0	0	0	0	0	0	0	0	0	0	0	0	0	0	0	0	0	0	0	0	0	0	0	0	0	0	0	0	0	0	0	0	1
lib230524_TGTCCACCATCTAGAC-1	0	0	0	0	0	0	0	0	0	0	0	0	0	1	0	0	0	0	0	0	0	0	0	0	0	0	0	0	0	0	0	0	0	0	0	0	0	0	0	0	0	0	0	0	0	0	0	0	1
lib230524_TGTGTGAGTAGTAAGT-1	0	0	0	0	0	0	0	0	0	0	0	0	0	0	0	0	0	0	0	0	0	0	0	0	0	0	0	0	0	0	0	0	0	0	0	0	0	0	0	0	0	0	0	0	0	0	0	0	0
lib230524_TGTTACTAGAGAACCC-1	0	0	0	0	0	0	0	0	0	0	0	0	0	0	0	0	0	0	0	0	0	0	0	0	0	0	0	0	0	0	0	0	0	0	0	0	0	0	0	0	0	0	0	0	0	0	0	0	0
lib230524_TGTTACTCATTGGATC-1	0	0.104762	0	0.109091	0	0	0	0.395349	0	0.27707	0	0	0	0	0	0	0	0	0	0	0	0	0	0	0	0.444444	0	0	0	0.219828	0	0	0	0	0	0	0	0	0	0	0	0	0.104762	0.109091	0	0.395349	0.27707	0	0
lib230524_TGTTCATAGAAGGCTC-1	0	0	0	0.0868687	0	0	0	0.120155	0	0	0	0	0	0	0	0	0	0.37276	0	0	0	0	0	0	0	0	0.0909091	0	0	0.215517	0	0	0	0	0	0	0	0	0	0	0	0	0	0.0868687	0	0.120155	0	0	0
lib230524_TGTTCCGCAAGTGGGT-1	0	0	0	0	0	0	0	0	0	0	0	0	0	0	0	0	0	0.146953	0	0	0	0	0	0.711172	0	0	0	0	0	0.202586	0	0	0	0	0	0	0	0	0	1	0	0	0	0	0	0	0	0	0
lib230524_TGTTGAGAGACCTCAT-1	0	0	0	0	0	0	0	0	0	0	0	0	0	0	0	0	0	0	0	0	0	0	0	0	0	0	0	0	0	0	0	0	0	0	0	0	0	0	0	0	0	0	0	0	0	0	0	0	0
lib230524_TGTTGGATCCATTTAC-1	0	0	0	0.0868687	0	0	0	0.120155	0	0	0	0	0	0	0	0	0	0.37276	0	0	0	0	0	0	0	0	0.0909091	0	0	0.215517	0	0	0	0	0	0	0	0	0	0	0	0	0	0.0868687	0	0.120155	0	0	0
lib230524_TTACAGGAGGTTATAG-1	0	0	0	0.0868687	0	0	0	0.120155	0	0	0	0	0	0	0	0	0	0.37276	0	0	0	0	0	0	0	0	0.0909091	0	0	0.215517	0	0	0	0	0	0	0	0	0	0	0	0	0	0.0868687	0	0.120155	0	0	0
lib230524_TTACCATAGCCTGCCA-1	0	0	0	0	0	0	0	0	0	0	0	0	0	0	0	0	0	0	0	0	0	0.101149	0	0	0	0	0	0	0	0.258621	0	0	0	0	0	0	0	0	0	0	0	0	0	0	0	0	0	0	0
lib230524_TTACCATTCTACTATC-1	0	0	0	0	0	0	0	0	0	0	0	0	0	0	0	0	0	0	0	0	0	0	0	0	0	0	0	0	0	0	0	0	0	0	0	0	0	0	0	0	0	0	0	0	0	0	0	0	0
lib230524_TTACCGCAGGATTACA-1	0	0	0	0	0	0	0	0	0	0	0	0	0	0	0	0	0	0	0	0	0	0.101149	0	0	0	0	0	0	0	0.258621	0	0	0	0	0	0	0	0	0	0	0	0	0	0	0	0	0	0	0
lib230524_TTACGCCCAGCTTTGA-1	0	0.182313	0	0	0	0	0	0	0	0	0	0	0	0	0	0.163934	0	0.232975	0	0	0	0.232184	0	0	0	0	0	0	0	0.224138	0	0	0	0	0	0	0	0	0	0	0	0	0.182313	0	0	0	0	0	0
lib230524_TTACGTTAGTTTCGGT-1	0	0	0	0.0868687	0	0	0	0.120155	0	0	0	0	0	0	0	0	0	0.37276	0	0	0	0	0	0	0	0	0.0909091	0	0	0.215517	0	0	0	0	0	0	0	0	0	0	0	0	0	0.0868687	0	0.120155	0	0	0
lib230524_TTAGGCAAGACATCCT-1	0	0	0	0	0	0	0	0	0	0	0	0	0	0	0	0	0	0.146953	0	0	0	0	0	0.711172	0	0	0	0	0	0.202586	0	0	0	0	0	0	0	0	0	1	0	0	0	0	0	0	0	0	0
lib230524_TTAGGGTAGTACCCTA-1	0.0653061	0	0	0	0	0.124088	0	0.205426	0	0	0	0	0	0.884058	0	0.254098	0	0.444444	0	0.219697	0	0.114943	0	0	0	0	0.0988142	0	0	0	0	0	0.103529	0	0	0	0	0	0	0	0	0	0.0653061	0	0.124088	0.205426	0	0	0.884058
lib230524_TTAGTCTTCCTTCGAC-1	0	0	0	0	0	0	0	0	0	0	0	0	0	0	0	0	0	0.146953	0	0	0	0	0	0.711172	0	0	0	0	0	0.202586	0	0	0	0	0	0	0	0	0	1	0	0	0	0	0	0	0	0	0
lib230524_TTATTGCAGGGACAGG-1	0	0	0	0	0	0	0	0	0	0	0	0	0	0	0	0	0	0	0	0	0	0.101149	0	0	0	0	0	0	0	0.258621	0	0	0	0	0	0	0	0	0	0	0	0	0	0	0	0	0	0	0
lib230524_TTATTGCCAGCTGTCG-1	0.204082	0.0802721	0.228283	0.327273	0	0.703163	0	0.0310078	0.210191	0.146497	0.319261	0.0712401	0.156522	0.614493	0.340164	0.188525	0	0.240143	0.0492424	0.204545	0	0.413793	0.166213	0.318801	0.357143	0.484127	0.233202	0.359684	0.107759	0.142241	0.233553	0.0394737	0.143529	0.131765	0	0.877193	0.179104	0.223881	0.757143	0	0.185185	0.117284	0.284354	0.555556	0.703163	0.0310078	0.356688	0.390501	0.771014
lib230524_TTATTGCTCCTCGCAT-1	0	0	0	0	0	0	0	0	0	0	0	0	0	1	0	0	0	0	0	0	0	0	0	0	0	0	0	0	0	0	0	0	0	0	0	0	0	0	0	0	0	0	0	0	0	0	0	0	1
lib230524_TTCAATCAGACGGAAA-1	0	0	0	0.0868687	0	0	0	0.120155	0	0	0	0	0	0	0	0	0	0.37276	0	0	0	0	0	0	0	0	0.0909091	0	0	0.215517	0	0	0	0	0	0	0	0	0	0	0	0	0	0.0868687	0	0.120155	0	0	0
lib230524_TTCAATCGTGTATACC-1	0	0	0	0.0868687	0	0	0	0.120155	0	0	0	0	0	0	0	0	0	0.37276	0	0	0	0	0	0	0	0	0.0909091	0	0	0.215517	0	0	0	0	0	0	0	0	0	0	0	0	0	0.0868687	0	0.120155	0	0	0
lib230524_TTCAATCTCATTGCGA-1	0	0.104762	0	0.109091	0	0	0	0.395349	0	0.27707	0	0	0	0	0	0	0	0	0	0	0	0	0	0	0	0.444444	0	0	0	0.219828	0	0	0	0	0	0	0	0	0	0	0	0	0.104762	0.109091	0	0.395349	0.27707	0	0
lib230524_TTCAATCTCTCAAAGC-1	0	0	0	0	0	0	0	0	0	0	0	0	0	0	0	0	0	0.146953	0	0	0	0	0	0.711172	0	0	0	0	0	0.202586	0	0	0	0	0	0	0	0	0	1	0	0	0	0	0	0	0	0	0
lib230524_TTCACCGGTATTAAGG-1	0	0	0	0	0	0	0.372093	0	0	0	0	0	0	0	0	0	0	0	0	0	0	0	0	0	0	0	0	0	0	0.336207	0	0	0	0	0	0	0	0	0	0	0	0	0	0	0	0.372093	0	0	0
lib230524_TTCACGCCACAGAGCA-1	0	0	0	0	0	0	0	0	0	0	0	0	0	0	0	0	0	0.480287	0	0	0	0.0988506	0	0.604905	0	0	0	0	0	0.142241	0	0	0	0	0	0	0	0	0	0	0	0	0	0	0	0	0	0	0
lib230524_TTCACGCGTCTCGGGT-1	0	0	0	0	0	0	0	0	0	0	0	0	0	0	0	0	0	0	0	0	0	0	0	0	0	0	0	0	0	0	0	0	0	0	0	0	0	0	0	0	0	0	0	0	0	0	0	0	0
lib230524_TTCATTGAGGACTTCT-1	0	0	0	0	0	0	0	0	0	0	0	0	0	0	0	0	0	0	0	0	0	0	0	0	0	0	0	0	0	0	0	0	0	0	0	0	0	0	0	0	0	0	0	0	0	0	0	0	0
lib230524_TTCCAATAGTCGAAGC-1	0	0	0	0	0	0	0	0	0	0	0	0	0	0	0	0	0	0	0	0	0	0	0	0	0	0	0	0	0	0	0	0	0	0	0	0	0	0	0	0	0	0	0	0	0	0	0	0	0
lib230524_TTCCACGAGACTAAGT-1	0	0	0	0	0	0	0	0	0	0	0	0	0	1	0	0	0	0	0	0	0	0	0	0	0	0	0	0	0	0	0	0	0	0	0	0	0	0	0	0	0	0	0	0	0	0	0	0	1
lib230524_TTCCGTGAGACAACAT-1	0.0653061	0	0	0	0	0.124088	0	0.205426	0	0	0	0	0	0.884058	0	0.254098	0	0.444444	0	0.219697	0	0.114943	0	0	0	0	0.0988142	0	0	0	0	0	0.103529	0	0	0	0	0	0	0	0	0	0.0653061	0	0.124088	0.205426	0	0	0.884058
lib230524_TTCCGTGGTTGTAGCT-1	0	0	0	0	0	0	0	0	0	0	0	0	0	0	0	0	0	0.480287	0	0	0	0.0988506	0	0.604905	0	0	0	0	0	0.142241	0	0	0	0	0	0	0	0	0	0	0	0	0	0	0	0	0	0	0
lib230524_TTCCTAAAGCGGGTAT-1	0	0	0	0	0	0	0	0	0	0	0	0	0	1	0	0	0	0	0	0	0	0	0	0	0	0	0	0	0	0	0	0	0	0	0	0	0	0	0	0	0	0	0	0	0	0	0	0	1
lib230524_TTCCTAACACACCTGG-1	0	0.104762	0	0.109091	0	0	0	0.395349	0	0.27707	0	0	0	0	0	0	0	0	0	0	0	0	0	0	0	0.444444	0	0	0	0.219828	0	0	0	0	0	0	0	0	0	0	0	0	0.104762	0.109091	0	0.395349	0.27707	0	0
lib230524_TTCCTCTTCATACGGT-1	0	0	0	0	0	0	0	0	0	0	0	0	0	0	0	0	0	0.146953	0	0	0	0	0	0.711172	0	0	0	0	0	0.202586	0	0	0	0	0	0	0	0	0	1	0	0	0	0	0	0	0	0	0
lib230524_TTCCTTCTCCATTTCA-1	0	0	0	0	0	0	0	0	0	0	0	0	0	0	0	0	0	0.146953	0	0	0	0	0	0.711172	0	0	0	0	0	0.202586	0	0	0	0	0	0	0	0	0	1	0	0	0	0	0	0	0	0	0
lib230524_TTCGATTGTCATAACC-1	0	0	0	0	0	0	0	0	0	0	0	0	0	1	0	0	0	0	0	0	0	0	0	0	0	0	0	0	0	0	0	0	0	0	0	0	0	0	0	0	0	0	0	0	0	0	0	0	1
lib230524_TTCGGTCGTTGTCCCT-1	0	0.182313	0	0	0	0	0	0	0	0	0	0	0	0	0	0.163934	0	0.232975	0	0	0	0.232184	0	0	0	0	0	0	0	0.224138	0	0	0	0	0	0	0	0	0	0	0	0	0.182313	0	0	0	0	0	0
lib230524_TTCTAACCAGCTTTCC-1	0.0571429	0	0	0	0	0.145985	0	0.112403	0	0	0	0	0	0	0	0.188525	0	0	0	0	0	0.0827586	0	0	0	0	0	0	0	0.168103	0	0	0	0	0	0	0	0	0	0	0	0	0.0571429	0	0.145985	0.112403	0	0	0
lib230524_TTCTAACGTGACTCTA-1	0	0.182313	0	0	0	0	0	0	0	0	0	0	0	0	0	0.163934	0	0.232975	0	0	0	0.232184	0	0	0	0	0	0	0	0.224138	0	0	0	0	0	0	0	0	0	0	0	0	0.182313	0	0	0	0	0	0
lib230524_TTCTAGTGTATAGGAT-1	0	0	0	0	0	0	0	0	0	0	0	0	0	1	0	0	0	0	0	0	0	0	0	0	0	0	0	0	0	0	0	0	0	0	0	0	0	0	0	0	0	0	0	0	0	0	0	0	1
lib230524_TTCTCTCTCATCTACT-1	0	0	0	0	0	0	0	0	0	0	0	0	0	1	0	0	0	0	0	0	0	0	0	0	0	0	0	0	0	0	0	0	0	0	0	0	0	0	0	0	0	0	0	0	0	0	0	0	1
lib230524_TTGACCCCAATAACGA-1	0	0	0	0	0	0	0	0	0	0	0	0	0	0	0	0	0	0.146953	0	0	0	0	0	0.711172	0	0	0	0	0	0.202586	0	0	0	0	0	0	0	0	0	1	0	0	0	0	0	0	0	0	0
lib230524_TTGATGGCAACTGCCG-1	0	0	0	0	0	0	0	0	0	0	0	0	0	0	0	0	0	0.146953	0	0	0	0	0	0.711172	0	0	0	0	0	0.202586	0	0	0	0	0	0	0	0	0	1	0	0	0	0	0	0	0	0	0
lib230524_TTGCATTAGGAATGTT-1	0	0	0	0	0	0	0	0	0	0	0	0	0	0	0	0	0	0	0	0	0	0	0	0	0	0	0	0	0	0	0	0	0	0	0	0	0	0	0	0	0	0	0	0	0	0	0	0	0
lib230524_TTGCATTTCGTAACAC-1	0	0	0	0	0	0	0	0	0	0	0	0	0	0	0	0	0	0	0	0	0	0.101149	0	0	0	0	0	0	0	0.258621	0	0	0	0	0	0	0	0	0	0	0	0	0	0	0	0	0	0	0
lib230524_TTGCGTCGTCGTATTG-1	0	0.182313	0	0	0	0	0	0	0	0	0	0	0	0	0	0.163934	0	0.232975	0	0	0	0.232184	0	0	0	0	0	0	0	0.224138	0	0	0	0	0	0	0	0	0	0	0	0	0.182313	0	0	0	0	0	0
lib230524_TTGCTGCAGCACTCCG-1	0.0653061	0	0	0	0	0.124088	0	0.205426	0	0	0	0	0	0.884058	0	0.254098	0	0.444444	0	0.219697	0	0.114943	0	0	0	0	0.0988142	0	0	0	0	0	0.103529	0	0	0	0	0	0	0	0	0	0.0653061	0	0.124088	0.205426	0	0	0.884058
lib230524_TTGGATGTCGAGAAGC-1	0	0	0	0	0	0	0	0	0	0	0	0	0	0	0	0	0	0	0	0	0	0	0	0	0	0	0	0	0	0	0	0	0	0	0	0	0	0	0	0	0	0	0	0	0	0	0	0	0
lib230524_TTGGGTAGTAGTACGG-1	0	0	0	0	0	0	0	0	0	0	0	0	0	0	0	0	0	0.146953	0	0	0	0	0	0.711172	0	0	0	0	0	0.202586	0	0	0	0	0	0	0	0	0	1	0	0	0	0	0	0	0	0	0
lib230524_TTGGTTTCAAGTCATC-1	0	0	0	0	0	0	0	0	0	0	0	0	0	0	0	0	0	0	0	0	0	0	0	0	0	0	0	0	0	0	0	0	0	0	0	0	0	0	0	0	0	0	0	0	0	0	0	0	0
lib230524_TTGTGGAAGCTAGCCC-1	0	0	0	0.0868687	0	0	0	0.120155	0	0	0	0	0	0	0	0	0	0.37276	0	0	0	0	0	0	0	0	0.0909091	0	0	0.215517	0	0	0	0	0	0	0	0	0	0	0	0	0	0.0868687	0	0.120155	0	0	0
lib230524_TTGTGTTAGCATCAGG-1	0	0	0	0	0	0	0	0	0	0	0	0	0	0	0	0	0	0.146953	0	0	0	0	0	0.711172	0	0	0	0	0	0.202586	0	0	0	0	0	0	0	0	0	1	0	0	0	0	0	0	0	0	0
lib230524_TTGTTCAAGCGGATCA-1	0	0	0	0	0	0	0	0	0	0	0	0	0	1	0	0	0	0	0	0	0	0	0	0	0	0	0	0	0	0	0	0	0	0	0	0	0	0	0	0	0	0	0	0	0	0	0	0	1
lib230524_TTGTTGTCATCGGAAG-1	0	0	0	0	0	0	0	0	0	0	0	0	0	1	0	0	0	0	0	0	0	0	0	0	0	0	0	0	0	0	0	0	0	0	0	0	0	0	0	0	0	0	0	0	0	0	0	0	1
lib230524_TTGTTTGCATGTACGT-1	0	0	0	0	0	0	0	0	0	0	0	0	0	0	0	0	0	0.146953	0	0	0	0	0	0.711172	0	0	0	0	0	0.202586	0	0	0	0	0	0	0	0	0	1	0	0	0	0	0	0	0	0	0
lib230524_TTGTTTGTCTGGGATT-1	0	0	0	0	0	0	0	0	0	0	0	0	0	0	0	0	0	0.146953	0	0	0	0	0	0.711172	0	0	0	0	0	0.202586	0	0	0	0	0	0	0	0	0	1	0	0	0	0	0	0	0	0	0
lib230524_TTTATGCCAATCGCGC-1	0	0	0	0.0868687	0	0	0	0.120155	0	0	0	0	0	0	0	0	0	0.37276	0	0	0	0	0	0	0	0	0.0909091	0	0	0.215517	0	0	0	0	0	0	0	0	0	0	0	0	0	0.0868687	0	0.120155	0	0	0
lib230524_TTTCAGTAGTTGCTCA-1	0	0.167347	0	0	0	0	0	0.162791	0	0	0	0	0	0	0	0.188525	0	0.129032	0	0	0	0	0	0	0	0	0	0	0	0	0	0	0	0.251765	0	0	0	0	0	0	0	0	0.167347	0	0	0.162791	0	0	0
lib230524_TTTCCTCAGCGAACTG-1	0.0571429	0	0	0	0	0.145985	0	0.112403	0	0	0	0	0	0	0	0.188525	0	0	0	0	0	0.0827586	0	0	0	0	0	0	0	0.168103	0	0	0	0	0	0	0	0	0	0	0	0	0.0571429	0	0.145985	0.112403	0	0	0
lib230524_TTTCGATCACGTTGGC-1	0	0	0	0	0	0	0	0	0	0	0	0	0	0	0	0	0	0	0	0	0	0	0	0	0	0	0	0	0	0	0	0	0	0	0	0	0	0	0	0	0	0	0	0	0	0	0	0	0
lib230524_TTTGACTAGGGCAACT-1	0	0	0	0	0	0	0	0	0	0	0	0	0	1	0	0	0	0	0	0	0	0	0	0	0	0	0	0	0	0	0	0	0	0	0	0	0	0	0	0	0	0	0	0	0	0	0	0	1
lib230524_TTTGATCAGTCTTCCC-1	0	0	0	0	0	0	0	0	0	0	0	0	0	1	0	0	0	0	0	0	0	0	0	0	0	0	0	0	0	0	0	0	0	0	0	0	0	0	0	0	0	0	0	0	0	0	0	0	1
lib230524_TTTGATCTCGACGCTG-1	0	0	0	0	0	0	0	0	0	0	0	0	0	0	0	0	0	0	0	0	0	0.101149	0	0	0	0	0	0	0	0.258621	0	0	0	0	0	0	0	0	0	0	0	0	0	0	0	0	0	0	0
lib230524_TTTGATCTCTCGCAGG-1	0	0	0	0	0	0	0	0	0	0	0	0	0	1	0	0	0	0	0	0	0	0	0	0	0	0	0	0	0	0	0	0	0	0	0	0	0	0	0	0	0	0	0	0	0	0	0	0	1
lib230524_TTTGGTTAGCTAATGA-1	0	0	0	0	0	0	0.372093	0	0	0	0	0	0	0	0	0	0	0	0	0	0	0	0	0	0	0	0	0	0	0.336207	0	0	0	0	0	0	0	0	0	0	0	0	0	0	0	0.372093	0	0	0
lib230524_TTTGTTGGTAACATCC-1	0	0	0	0	0	0	0	0	0	0	0	0	0	0	0	0	0	0	0	0	0	0.101149	0	0	0	0	0	0	0	0.258621	0	0	0	0	0	0	0	0	0	0	0	0	0	0	0	0	0	0	0
lib230331_AAACCCACACTCCGAG-1	0	0	0	0.0888889	0.0510949	0	0	0	0	0	0	0	0	0	0	0	0	0.46595	0	0	0	0	0	0.332425	0	0	0	0	0	0	0	0	0	0.202353	0	0	0	0.308458	0	0	0	0	0	0.0888889	0.0510949	0	0	0	0
lib230331_AACCAACCACTTCTCG-1	0	0	0	0.0888889	0.0510949	0	0	0	0	0	0	0	0	0	0	0	0	0.46595	0	0	0	0	0	0.332425	0	0	0	0	0	0	0	0	0	0.202353	0	0	0	0.308458	0	0	0	0	0	0.0888889	0.0510949	0	0	0	0
lib230331_AACCTTTTCGAGAAAT-1	0	0	0	0.0888889	0.0510949	0	0	0	0	0	0	0	0	0	0	0	0	0.46595	0	0	0	0	0	0.332425	0	0	0	0	0	0	0	0	0	0.202353	0	0	0	0.308458	0	0	0	0	0	0.0888889	0.0510949	0	0	0	0
lib230331_AAGACAACAAGAGTGC-1	0	0	0	0	0	0	0	0	0	0	0.279683	0	0	0	0	0	0	0	0	0	0	0	0	0.441417	0	0	0	0	0	0	0	0	0	0.237647	0	0	0	0	0	0	0	0	0	0	0	0	0	0.279683	0
lib230331_AAGACAATCCCATTTA-1	0	0	0	0	0	0	0	0	0	0	0.279683	0	0	0	0	0	0	0	0	0	0	0	0	0.441417	0	0	0	0	0	0	0	0	0	0.237647	0	0	0	0	0	0	0	0	0	0	0	0	0	0.279683	0
lib230331_AAGCATCAGCTAAATG-1	0	0	0	0.113131	0	0	0	0.174419	0	0	0	0.121372	0	0.15942	0	0	0	0.415771	0	0	0	0.0735632	0	0	0	0	0	0	0	0	0	0	0	0.155294	0	0	0	0	1	0	0	0	0	0.113131	0	0.174419	0	0.121372	0.15942
lib230331_AAGCCATCACTGCGTG-1	0	0	0	0	0	0	0	0	0	0	0	0	0	0	0	0	0	0	0	0	0	0.0873563	0	0	0	0	0	0	0	0	0	0	0	0	0	0	0	0	0	0	0	0	0	0	0	0	0	0	0
lib230331_AAGTTCGAGCGAGGAG-1	0	0	0	0	0	0	0	0	0	0	0.279683	0	0	0	0	0	0	0	0	0	0	0	0	0.441417	0	0	0	0	0	0	0	0	0	0.237647	0	0	0	0	0	0	0	0	0	0	0	0	0	0.279683	0
lib230331_AATCACGGTACGATCT-1	0	0	0	0.113131	0	0	0	0.174419	0	0	0	0.121372	0	0.15942	0	0	0	0.415771	0	0	0	0.0735632	0	0	0	0	0	0	0	0	0	0	0	0.155294	0	0	0	0	1	0	0	0	0	0.113131	0	0.174419	0	0.121372	0.15942
lib230331_AATGCCACACGCGCTA-1	0	0	0	0	0	0	0	0	0	0	0	0	0	0	0	0	0	0	0	0	0	0.0873563	0	0	0	0	0	0	0	0	0	0	0	0	0	0	0	0	0	0	0	0	0	0	0	0	0	0	0
lib230331_AATGCCACAGCTACTA-1	0	0	0	0.0747475	0	0	0	0.224806	0	0	0	0	0	0	0	0.381148	0	0.362007	0	0.25	0	0.211494	0	0	0	0	0	0.407115	0	0	0.134868	0	0	0	0	0.333333	0	0.328358	0	0	0	0	0	0.0747475	0	0.224806	0	0	0
lib230331_ACAAAGACATCGCCTT-1	0	0.0952381	0	0.0929293	0	0.206813	0	0	0	0	0.25066	0	0	0	0	0	0	0	0	0.231061	0	0.110345	0	0.155313	0	0	0	0	0	0.24569	0	0	0	0.0823529	0	0	0	0	0	0	0	0	0.0952381	0.0929293	0.206813	0	0	0.25066	0
lib230331_ACACAGTAGGAAGAAC-1	0	0	0	0.0888889	0.0510949	0	0	0	0	0	0	0	0	0	0	0	0	0.46595	0	0	0	0	0	0.332425	0	0	0	0	0	0	0	0	0	0.202353	0	0	0	0.308458	0	0	0	0	0	0.0888889	0.0510949	0	0	0	0
lib230331_ACACGCGAGACCTTTG-1	0	0	0	0.113131	0	0	0	0.174419	0	0	0	0.121372	0	0.15942	0	0	0	0.415771	0	0	0	0.0735632	0	0	0	0	0	0	0	0	0	0	0	0.155294	0	0	0	0	1	0	0	0	0	0.113131	0	0.174419	0	0.121372	0.15942
lib230331_ACAGGGACAAAGCTCT-1	0	0	0	0.0747475	0	0	0	0.224806	0	0	0	0	0	0	0	0.381148	0	0.362007	0	0.25	0	0.211494	0	0	0	0	0	0.407115	0	0	0.134868	0	0	0	0	0.333333	0	0.328358	0	0	0	0	0	0.0747475	0	0.224806	0	0	0
lib230331_ACCATTTTCCAGTGCG-1	0.270748	0.062585	0	0	0	0.199513	0	0	0	0	0	0	0	0	0	0	0	0	0	0	0	0	0	0.217984	0	0.5	0	0	0	0	0	0	0	0	0	0.45614	0	0	0	0	0	0	0.333333	0	0.199513	0	0	0	0
lib230331_ACGATGTGTCCCACGA-1	0	0	0	0.0888889	0.0510949	0	0	0	0	0	0	0	0	0	0	0	0	0.46595	0	0	0	0	0	0.332425	0	0	0	0	0	0	0	0	0	0.202353	0	0	0	0.308458	0	0	0	0	0	0.0888889	0.0510949	0	0	0	0
lib230331_ACGGGTCCAATGTCAC-1	0	0	0	0	0	0	0	0	0	0	0.279683	0	0	0	0	0	0	0	0	0	0	0	0	0.441417	0	0	0	0	0	0	0	0	0	0.237647	0	0	0	0	0	0	0	0	0	0	0	0	0	0.279683	0
lib230331_ACGGGTCCAGAACATA-1	0	0	0	0.113131	0	0	0	0.174419	0	0	0	0.121372	0	0.15942	0	0	0	0.415771	0	0	0	0.0735632	0	0	0	0	0	0	0	0	0	0	0	0.155294	0	0	0	0	1	0	0	0	0	0.113131	0	0.174419	0	0.121372	0.15942
lib230331_ACGTAGTCAACCCGCA-1	0	0	0	0	0	0	0	0	0	0	0.279683	0	0	0	0	0	0	0	0	0	0	0	0	0.441417	0	0	0	0	0	0	0	0	0	0.237647	0	0	0	0	0	0	0	0	0	0	0	0	0	0.279683	0
lib230331_ACGTAGTTCACGACTA-1	0	0	0	0.0888889	0.0510949	0	0	0	0	0	0	0	0	0	0	0	0	0.46595	0	0	0	0	0	0.332425	0	0	0	0	0	0	0	0	0	0.202353	0	0	0	0.308458	0	0	0	0	0	0.0888889	0.0510949	0	0	0	0
lib230331_ACTATGGGTAAGACCG-1	0	0	0	0.0888889	0.0510949	0	0	0	0	0	0	0	0	0	0	0	0	0.46595	0	0	0	0	0	0.332425	0	0	0	0	0	0	0	0	0	0.202353	0	0	0	0.308458	0	0	0	0	0	0.0888889	0.0510949	0	0	0	0
lib230331_ACTCTCGAGGCTCTCG-1	0	0	0	0.113131	0	0	0	0.174419	0	0	0	0.121372	0	0.15942	0	0	0	0.415771	0	0	0	0.0735632	0	0	0	0	0	0	0	0	0	0	0	0.155294	0	0	0	0	1	0	0	0	0	0.113131	0	0.174419	0	0.121372	0.15942
lib230331_ACTGCAAGTACGACAG-1	0	0	0	0.113131	0	0	0	0.174419	0	0	0	0.121372	0	0.15942	0	0	0	0.415771	0	0	0	0.0735632	0	0	0	0	0	0	0	0	0	0	0	0.155294	0	0	0	0	1	0	0	0	0	0.113131	0	0.174419	0	0.121372	0.15942
lib230331_ACTGTGAGTCTTGCTC-1	0	0	0	0.113131	0	0	0	0.174419	0	0	0	0.121372	0	0.15942	0	0	0	0.415771	0	0	0	0.0735632	0	0	0	0	0	0	0	0	0	0	0	0.155294	0	0	0	0	1	0	0	0	0	0.113131	0	0.174419	0	0.121372	0.15942
lib230331_ACTTAGGTCAGCTGAT-1	0	0	0	0	0	0	0	0	0	0	0.279683	0	0	0	0	0	0	0	0	0	0	0	0	0.441417	0	0	0	0	0	0	0	0	0	0.237647	0	0	0	0	0	0	0	0	0	0	0	0	0	0.279683	0
lib230331_ACTTCCGCACACGTGC-1	0	0	0	0.0747475	0	0	0	0.224806	0	0	0	0	0	0	0	0.381148	0	0.362007	0	0.25	0	0.211494	0	0	0	0	0	0.407115	0	0	0.134868	0	0	0	0	0.333333	0	0.328358	0	0	0	0	0	0.0747475	0	0.224806	0	0	0
lib230331_ACTTTCAAGAGCATCG-1	0	0.0952381	0	0.0929293	0	0.206813	0	0	0	0	0.25066	0	0	0	0	0	0	0	0	0.231061	0	0.110345	0	0.155313	0	0	0	0	0	0.24569	0	0	0	0.0823529	0	0	0	0	0	0	0	0	0.0952381	0.0929293	0.206813	0	0	0.25066	0
lib230331_ACTTTCATCCTGTTGC-1	0	0	0	0	0	0	0	0	0	0	0	0	0	0	0	0	0	0	0	0	0	0.0873563	0	0	0	0	0	0	0	0	0	0	0	0	0	0	0	0	0	0	0	0	0	0	0	0	0	0	0
lib230331_AGAACCTAGTGCAAAT-1	0	0	0	0.113131	0	0	0	0.174419	0	0	0	0.121372	0	0.15942	0	0	0	0.415771	0	0	0	0.0735632	0	0	0	0	0	0	0	0	0	0	0	0.155294	0	0	0	0	1	0	0	0	0	0.113131	0	0.174419	0	0.121372	0.15942
lib230331_AGACACTAGTACGTCT-1	0	0	0	0.113131	0	0	0	0.174419	0	0	0	0.121372	0	0.15942	0	0	0	0.415771	0	0	0	0.0735632	0	0	0	0	0	0	0	0	0	0	0	0.155294	0	0	0	0	1	0	0	0	0	0.113131	0	0.174419	0	0.121372	0.15942
lib230331_AGACCATGTGAGACCA-1	0	0	0	0.0888889	0.0510949	0	0	0	0	0	0	0	0	0	0	0	0	0.46595	0	0	0	0	0	0.332425	0	0	0	0	0	0	0	0	0	0.202353	0	0	0	0.308458	0	0	0	0	0	0.0888889	0.0510949	0	0	0	0
lib230331_AGACTCAAGGGATGTC-1	0	0	0	0.0888889	0.0510949	0	0	0	0	0	0	0	0	0	0	0	0	0.46595	0	0	0	0	0	0.332425	0	0	0	0	0	0	0	0	0	0.202353	0	0	0	0.308458	0	0	0	0	0	0.0888889	0.0510949	0	0	0	0
lib230331_AGACTCACAGACTGCC-1	0	0	0	0.0888889	0.0510949	0	0	0	0	0	0	0	0	0	0	0	0	0.46595	0	0	0	0	0	0.332425	0	0	0	0	0	0	0	0	0	0.202353	0	0	0	0.308458	0	0	0	0	0	0.0888889	0.0510949	0	0	0	0
lib230331_AGACTCAGTGAATTGA-1	0	0	0	0	0	0	0	0	0	0	0	0	0	0	0	0	0	0	0	0	0	0.0873563	0	0	0	0	0	0	0	0	0	0	0	0	0	0	0	0	0	0	0	0	0	0	0	0	0	0	0
lib230331_AGCATCAGTTATGGTC-1	0	0	0	0	0	0	0	0	0	0	0	0	0	0	0	0	0	0	0	0	0	0.0873563	0	0	0	0	0	0	0	0	0	0	0	0	0	0	0	0	0	0	0	0	0	0	0	0	0	0	0
lib230331_AGCCAGCTCTCTTCAA-1	0	0	0	0	0	0	0	0	0	0	0	0	0	0	0	0	0	0	0	0	0	0.0873563	0	0	0	0	0	0	0	0	0	0	0	0	0	0	0	0	0	0	0	0	0	0	0	0	0	0	0
lib230331_AGCGCCACAATGACCT-1	0	0	0	0	0	0	0	0	0	0	0	0	0	0	0	0	0	0	0	0	0	0.0873563	0	0	0	0	0	0	0	0	0	0	0	0	0	0	0	0	0	0	0	0	0	0	0	0	0	0	0
lib230331_AGCTACATCGCTCATC-1	0	0	0	0	0	0	0	0	0	0	0.279683	0	0	0	0	0	0	0	0	0	0	0	0	0.441417	0	0	0	0	0	0	0	0	0	0.237647	0	0	0	0	0	0	0	0	0	0	0	0	0	0.279683	0
lib230331_AGCTACATCTTGAGCA-1	0	0	0	0.0888889	0.0510949	0	0	0	0	0	0	0	0	0	0	0	0	0.46595	0	0	0	0	0	0.332425	0	0	0	0	0	0	0	0	0	0.202353	0	0	0	0.308458	0	0	0	0	0	0.0888889	0.0510949	0	0	0	0
lib230331_AGCTCAAAGTGCAACG-1	0	0	0	0	0	0	0	0	0	0	0	0	0	0	0	0	0	0	0	0	0	0.0873563	0	0	0	0	0	0	0	0	0	0	0	0	0	0	0	0	0	0	0	0	0	0	0	0	0	0	0
lib230331_AGCTTCCCAAATCCCA-1	0	0	0	0	0	0	0	0	0	0	0	0	0	0	0	0	0	0	0	0	0	0.0873563	0	0	0	0	0	0	0	0	0	0	0	0	0	0	0	0	0	0	0	0	0	0	0	0	0	0	0
lib230331_AGCTTCCCATGCAGGA-1	0	0	0	0.0888889	0.0510949	0	0	0	0	0	0	0	0	0	0	0	0	0.46595	0	0	0	0	0	0.332425	0	0	0	0	0	0	0	0	0	0.202353	0	0	0	0.308458	0	0	0	0	0	0.0888889	0.0510949	0	0	0	0
lib230331_AGGCTGCCAGTCGCAC-1	0	0.0952381	0	0.0929293	0	0.206813	0	0	0	0	0.25066	0	0	0	0	0	0	0	0	0.231061	0	0.110345	0	0.155313	0	0	0	0	0	0.24569	0	0	0	0.0823529	0	0	0	0	0	0	0	0	0.0952381	0.0929293	0.206813	0	0	0.25066	0
lib230331_AGGCTGCGTATCGATC-1	0	0	0	0.0888889	0.0510949	0	0	0	0	0	0	0	0	0	0	0	0	0.46595	0	0	0	0	0	0.332425	0	0	0	0	0	0	0	0	0	0.202353	0	0	0	0.308458	0	0	0	0	0	0.0888889	0.0510949	0	0	0	0
lib230331_AGGTCATAGTTGGAAT-1	0.270748	0.062585	0	0	0	0.199513	0	0	0	0	0	0	0	0	0	0	0	0	0	0	0	0	0	0.217984	0	0.5	0	0	0	0	0	0	0	0	0	0.45614	0	0	0	0	0	0	0.333333	0	0.199513	0	0	0	0
lib230331_AGGTCATGTTGTGCAT-1	0	0	0	0.0888889	0.0510949	0	0	0	0	0	0	0	0	0	0	0	0	0.46595	0	0	0	0	0	0.332425	0	0	0	0	0	0	0	0	0	0.202353	0	0	0	0.308458	0	0	0	0	0	0.0888889	0.0510949	0	0	0	0
lib230331_AGGTGTTAGATGCGAC-1	0	0.0952381	0	0.0929293	0	0.206813	0	0	0	0	0.25066	0	0	0	0	0	0	0	0	0.231061	0	0.110345	0	0.155313	0	0	0	0	0	0.24569	0	0	0	0.0823529	0	0	0	0	0	0	0	0	0.0952381	0.0929293	0.206813	0	0	0.25066	0
lib230331_AGTACCAGTCGGTACC-1	0	0	0	0	0	0	0	0	0	0	0.279683	0	0	0	0	0	0	0	0	0	0	0	0	0.441417	0	0	0	0	0	0	0	0	0	0.237647	0	0	0	0	0	0	0	0	0	0	0	0	0	0.279683	0
lib230331_AGTCAACAGCCTATCA-1	0	0	0	0	0	0	0	0	0	0	0.279683	0	0	0	0	0	0	0	0	0	0	0	0	0.441417	0	0	0	0	0	0	0	0	0	0.237647	0	0	0	0	0	0	0	0	0	0	0	0	0	0.279683	0
lib230331_AGTGACTCATCCGTTC-1	0	0	0	0.0888889	0.0510949	0	0	0	0	0	0	0	0	0	0	0	0	0.46595	0	0	0	0	0	0.332425	0	0	0	0	0	0	0	0	0	0.202353	0	0	0	0.308458	0	0	0	0	0	0.0888889	0.0510949	0	0	0	0
lib230331_AGTGTTGCACCAGTTA-1	0	0	0	0.113131	0	0	0	0.174419	0	0	0	0.121372	0	0.15942	0	0	0	0.415771	0	0	0	0.0735632	0	0	0	0	0	0	0	0	0	0	0	0.155294	0	0	0	0	1	0	0	0	0	0.113131	0	0.174419	0	0.121372	0.15942
lib230331_ATACCTTCACGTCATA-1	0.270748	0.062585	0	0	0	0.199513	0	0	0	0	0	0	0	0	0	0	0	0	0	0	0	0	0	0.217984	0	0.5	0	0	0	0	0	0	0	0	0	0.45614	0	0	0	0	0	0	0.333333	0	0.199513	0	0	0	0
lib230331_ATACCTTCAGCTACTA-1	0	0	0	0	0	0	0	0	0	0	0.279683	0	0	0	0	0	0	0	0	0	0	0	0	0.441417	0	0	0	0	0	0	0	0	0	0.237647	0	0	0	0	0	0	0	0	0	0	0	0	0	0.279683	0
lib230331_ATAGACCTCCTCCACA-1	0	0.0952381	0	0.0929293	0	0.206813	0	0	0	0	0.25066	0	0	0	0	0	0	0	0	0.231061	0	0.110345	0	0.155313	0	0	0	0	0	0.24569	0	0	0	0.0823529	0	0	0	0	0	0	0	0	0.0952381	0.0929293	0.206813	0	0	0.25066	0
lib230331_ATAGGCTTCCGCTTAC-1	0	0	0	0	0	0	0	0	0	0	0	0	0	0	0	0	0	0	0	0	0	0.0873563	0	0	0	0	0	0	0	0	0	0	0	0	0	0	0	0	0	0	0	0	0	0	0	0	0	0	0
lib230331_ATATCCTAGAGCAACC-1	0	0	0	0	0	0	0	0	0	0	0	0	0	0	0	0	0	0	0	0	0	0.0873563	0	0	0	0	0	0	0	0	0	0	0	0	0	0	0	0	0	0	0	0	0	0	0	0	0	0	0
lib230331_ATATCCTCAGAAGTGC-1	0	0	0	0	0	0	0	0	0	0	0.279683	0	0	0	0	0	0	0	0	0	0	0	0	0.441417	0	0	0	0	0	0	0	0	0	0.237647	0	0	0	0	0	0	0	0	0	0	0	0	0	0.279683	0
lib230331_ATCCACCGTACTAACC-1	0	0	0	0	0	0	0	0	0	0	0	0	0	0	0	0	0	0	0	0	0	0.0873563	0	0	0	0	0	0	0	0	0	0	0	0	0	0	0	0	0	0	0	0	0	0	0	0	0	0	0
lib230331_ATCCATTGTTGACTAC-1	0.288435	0.360544	0.0787879	0.341414	0	0.690998	0	0.751938	0.308917	0.417197	0.263852	0.242744	0	0.318841	0	0.758197	0.139785	0.458781	0	0.80303	0.445977	0.248276	0.506812	0.280654	0	1	0	0.29249	0	0.534483	0.5	0	0.536471	0.164706	0	1	0.298507	0	0	1	0.265432	0	0.64898	0.420202	0.690998	0.751938	0.726115	0.506596	0.318841
lib230331_ATCGCCTGTACAAACA-1	0	0	0	0	0	0	0	0	0	0	0.279683	0	0	0	0	0	0	0	0	0	0	0	0	0.441417	0	0	0	0	0	0	0	0	0	0.237647	0	0	0	0	0	0	0	0	0	0	0	0	0	0.279683	0
lib230331_ATCGGATAGTGACCTT-1	0	0	0	0	0	0	0	0	0	0	0.279683	0	0	0	0	0	0	0	0	0	0	0	0	0.441417	0	0	0	0	0	0	0	0	0	0.237647	0	0	0	0	0	0	0	0	0	0	0	0	0	0.279683	0
lib230331_ATCGTCCAGGGCAGAG-1	0.270748	0.062585	0	0	0	0.199513	0	0	0	0	0	0	0	0	0	0	0	0	0	0	0	0	0	0.217984	0	0.5	0	0	0	0	0	0	0	0	0	0.45614	0	0	0	0	0	0	0.333333	0	0.199513	0	0	0	0
lib230331_ATCGTGAAGTCTTGGT-1	0	0	0	0.113131	0	0	0	0.174419	0	0	0	0.121372	0	0.15942	0	0	0	0.415771	0	0	0	0.0735632	0	0	0	0	0	0	0	0	0	0	0	0.155294	0	0	0	0	1	0	0	0	0	0.113131	0	0.174419	0	0.121372	0.15942
lib230331_ATCTCTATCAGCTTGA-1	0	0	0	0	0	0	0	0	0	0	0	0	0	0	0	0	0	0	0	0	0	0.0873563	0	0	0	0	0	0	0	0	0	0	0	0	0	0	0	0	0	0	0	0	0	0	0	0	0	0	0
lib230331_ATGCCTCCACGTTCGG-1	0	0	0	0	0	0	0	0	0	0	0	0	0	0	0	0	0	0	0	0	0	0.0873563	0	0	0	0	0	0	0	0	0	0	0	0	0	0	0	0	0	0	0	0	0	0	0	0	0	0	0
lib230331_ATGCCTCCATCATCTT-1	0	0	0	0	0	0	0	0	0	0	0.279683	0	0	0	0	0	0	0	0	0	0	0	0	0.441417	0	0	0	0	0	0	0	0	0	0.237647	0	0	0	0	0	0	0	0	0	0	0	0	0	0.279683	0
lib230331_ATGCCTCGTGATCATC-1	0	0	0	0	0	0	0	0	0	0	0	0	0	0	0	0	0	0	0	0	0	0.0873563	0	0	0	0	0	0	0	0	0	0	0	0	0	0	0	0	0	0	0	0	0	0	0	0	0	0	0
lib230331_ATGGAGGCAAGTACCT-1	0	0	0	0	0	0	0	0	0	0	0.279683	0	0	0	0	0	0	0	0	0	0	0	0	0.441417	0	0	0	0	0	0	0	0	0	0.237647	0	0	0	0	0	0	0	0	0	0	0	0	0	0.279683	0
lib230331_ATGTCTTTCGCCTAGG-1	0	0	0	0	0	0	0	0	0	0	0	0	0	0	0	0	0	0	0	0	0	0.0873563	0	0	0	0	0	0	0	0	0	0	0	0	0	0	0	0	0	0	0	0	0	0	0	0	0	0	0
lib230331_ATTATCCGTATCCTTT-1	0.270748	0.062585	0	0	0	0.199513	0	0	0	0	0	0	0	0	0	0	0	0	0	0	0	0	0	0.217984	0	0.5	0	0	0	0	0	0	0	0	0	0.45614	0	0	0	0	0	0	0.333333	0	0.199513	0	0	0	0
lib230331_ATTCAGGTCCGGTAAT-1	0	0	0	0.113131	0	0	0	0.174419	0	0	0	0.121372	0	0.15942	0	0	0	0.415771	0	0	0	0.0735632	0	0	0	0	0	0	0	0	0	0	0	0.155294	0	0	0	0	1	0	0	0	0	0.113131	0	0.174419	0	0.121372	0.15942
lib230331_ATTCATCCACAATCTG-1	0	0.0952381	0	0.0929293	0	0.206813	0	0	0	0	0.25066	0	0	0	0	0	0	0	0	0.231061	0	0.110345	0	0.155313	0	0	0	0	0	0.24569	0	0	0	0.0823529	0	0	0	0	0	0	0	0	0.0952381	0.0929293	0.206813	0	0	0.25066	0
lib230331_ATTCCTACATCAGTCA-1	0	0.0952381	0	0.0929293	0	0.206813	0	0	0	0	0.25066	0	0	0	0	0	0	0	0	0.231061	0	0.110345	0	0.155313	0	0	0	0	0	0.24569	0	0	0	0.0823529	0	0	0	0	0	0	0	0	0.0952381	0.0929293	0.206813	0	0	0.25066	0
lib230331_ATTCGTTAGCCGATCC-1	0	0	0	0	0	0	0	0	0	0	0.279683	0	0	0	0	0	0	0	0	0	0	0	0	0.441417	0	0	0	0	0	0	0	0	0	0.237647	0	0	0	0	0	0	0	0	0	0	0	0	0	0.279683	0
lib230331_ATTCGTTAGGCAATGC-1	0.270748	0.062585	0	0	0	0.199513	0	0	0	0	0	0	0	0	0	0	0	0	0	0	0	0	0	0.217984	0	0.5	0	0	0	0	0	0	0	0	0	0.45614	0	0	0	0	0	0	0.333333	0	0.199513	0	0	0	0
lib230331_ATTGGGTGTTCGGTAT-1	0	0.0952381	0	0.0929293	0	0.206813	0	0	0	0	0.25066	0	0	0	0	0	0	0	0	0.231061	0	0.110345	0	0.155313	0	0	0	0	0	0.24569	0	0	0	0.0823529	0	0	0	0	0	0	0	0	0.0952381	0.0929293	0.206813	0	0	0.25066	0
lib230331_ATTTCACGTGCTGTCG-1	0	0	0	0.113131	0	0	0	0.174419	0	0	0	0.121372	0	0.15942	0	0	0	0.415771	0	0	0	0.0735632	0	0	0	0	0	0	0	0	0	0	0	0.155294	0	0	0	0	1	0	0	0	0	0.113131	0	0.174419	0	0.121372	0.15942
lib230331_CAACAACCAGTCGTTA-1	0	0	0	0	0	0	0	0	0	0	0	0	0	0	0	0	0	0	0	0	0	0.0873563	0	0	0	0	0	0	0	0	0	0	0	0	0	0	0	0	0	0	0	0	0	0	0	0	0	0	0
lib230331_CAACGATGTCAAGGCA-1	0	0	0	0.0888889	0.0510949	0	0	0	0	0	0	0	0	0	0	0	0	0.46595	0	0	0	0	0	0.332425	0	0	0	0	0	0	0	0	0	0.202353	0	0	0	0.308458	0	0	0	0	0	0.0888889	0.0510949	0	0	0	0
lib230331_CAATACGGTAGACACG-1	0	0	0	0.113131	0	0	0	0.174419	0	0	0	0.121372	0	0.15942	0	0	0	0.415771	0	0	0	0.0735632	0	0	0	0	0	0	0	0	0	0	0	0.155294	0	0	0	0	1	0	0	0	0	0.113131	0	0.174419	0	0.121372	0.15942
lib230331_CAATACGTCATCAGTG-1	0.270748	0.062585	0	0	0	0.199513	0	0	0	0	0	0	0	0	0	0	0	0	0	0	0	0	0	0.217984	0	0.5	0	0	0	0	0	0	0	0	0	0.45614	0	0	0	0	0	0	0.333333	0	0.199513	0	0	0	0
lib230331_CAATGACAGAAAGTCT-1	0	0	0	0.113131	0	0	0	0.174419	0	0	0	0.121372	0	0.15942	0	0	0	0.415771	0	0	0	0.0735632	0	0	0	0	0	0	0	0	0	0	0	0.155294	0	0	0	0	1	0	0	0	0	0.113131	0	0.174419	0	0.121372	0.15942
lib230331_CACGGGTAGCAGGCTA-1	0	0	0	0	0	0	0	0	0	0	0	0	0	0	0	0	0	0	0	0	0	0.0873563	0	0	0	0	0	0	0	0	0	0	0	0	0	0	0	0	0	0	0	0	0	0	0	0	0	0	0
lib230331_CACTAAGCAAGCCTGC-1	0	0.0952381	0	0.0929293	0	0.206813	0	0	0	0	0.25066	0	0	0	0	0	0	0	0	0.231061	0	0.110345	0	0.155313	0	0	0	0	0	0.24569	0	0	0	0.0823529	0	0	0	0	0	0	0	0	0.0952381	0.0929293	0.206813	0	0	0.25066	0
lib230331_CACTGAAGTACTCGCG-1	0	0	0	0	0	0	0	0	0	0	0	0	0	0	0	0	0	0	0	0	0	0.0873563	0	0	0	0	0	0	0	0	0	0	0	0	0	0	0	0	0	0	0	0	0	0	0	0	0	0	0
lib230331_CACTGGGAGTGAATAC-1	0.270748	0.062585	0	0	0	0.199513	0	0	0	0	0	0	0	0	0	0	0	0	0	0	0	0	0	0.217984	0	0.5	0	0	0	0	0	0	0	0	0	0.45614	0	0	0	0	0	0	0.333333	0	0.199513	0	0	0	0
lib230331_CACTGTCCAAGTGTCT-1	0	0	0	0.0747475	0	0	0	0.224806	0	0	0	0	0	0	0	0.381148	0	0.362007	0	0.25	0	0.211494	0	0	0	0	0	0.407115	0	0	0.134868	0	0	0	0	0.333333	0	0.328358	0	0	0	0	0	0.0747475	0	0.224806	0	0	0
lib230331_CAGCAATCAAGTATAG-1	0	0	0	0.0888889	0.0510949	0	0	0	0	0	0	0	0	0	0	0	0	0.46595	0	0	0	0	0	0.332425	0	0	0	0	0	0	0	0	0	0.202353	0	0	0	0.308458	0	0	0	0	0	0.0888889	0.0510949	0	0	0	0
lib230331_CAGCGTGAGGTCCCGT-1	0	0.0952381	0	0.0929293	0	0.206813	0	0	0	0	0.25066	0	0	0	0	0	0	0	0	0.231061	0	0.110345	0	0.155313	0	0	0	0	0	0.24569	0	0	0	0.0823529	0	0	0	0	0	0	0	0	0.0952381	0.0929293	0.206813	0	0	0.25066	0
lib230331_CAGCGTGGTGATTCAC-1	0	0	0	0	0	0	0	0	0	0	0	0	0	0	0	0	0	0	0	0	0	0.0873563	0	0	0	0	0	0	0	0	0	0	0	0	0	0	0	0	0	0	0	0	0	0	0	0	0	0	0
lib230331_CAGCGTGTCGCGTAGC-1	0	0.0952381	0	0.0929293	0	0.206813	0	0	0	0	0.25066	0	0	0	0	0	0	0	0	0.231061	0	0.110345	0	0.155313	0	0	0	0	0	0.24569	0	0	0	0.0823529	0	0	0	0	0	0	0	0	0.0952381	0.0929293	0.206813	0	0	0.25066	0
lib230331_CAGGCCAGTCTGCATA-1	0	0	0	0.0888889	0.0510949	0	0	0	0	0	0	0	0	0	0	0	0	0.46595	0	0	0	0	0	0.332425	0	0	0	0	0	0	0	0	0	0.202353	0	0	0	0.308458	0	0	0	0	0	0.0888889	0.0510949	0	0	0	0
lib230331_CAGTTCCCAAAGGGTC-1	0	0	0	0.0888889	0.0510949	0	0	0	0	0	0	0	0	0	0	0	0	0.46595	0	0	0	0	0	0.332425	0	0	0	0	0	0	0	0	0	0.202353	0	0	0	0.308458	0	0	0	0	0	0.0888889	0.0510949	0	0	0	0
lib230331_CATAAGCCACAATTCG-1	0	0	0	0.113131	0	0	0	0.174419	0	0	0	0.121372	0	0.15942	0	0	0	0.415771	0	0	0	0.0735632	0	0	0	0	0	0	0	0	0	0	0	0.155294	0	0	0	0	1	0	0	0	0	0.113131	0	0.174419	0	0.121372	0.15942
lib230331_CATCCACAGTGTTCCA-1	0	0	0	0	0	0	0	0	0	0	0	0	0	0	0	0	0	0	0	0	0	0.0873563	0	0	0	0	0	0	0	0	0	0	0	0	0	0	0	0	0	0	0	0	0	0	0	0	0	0	0
lib230331_CATCGTCAGTAAACAC-1	0	0	0	0.113131	0	0	0	0.174419	0	0	0	0.121372	0	0.15942	0	0	0	0.415771	0	0	0	0.0735632	0	0	0	0	0	0	0	0	0	0	0	0.155294	0	0	0	0	1	0	0	0	0	0.113131	0	0.174419	0	0.121372	0.15942
lib230331_CATCGTCCAACCGCTG-1	0	0	0	0	0	0	0	0	0	0	0.279683	0	0	0	0	0	0	0	0	0	0	0	0	0.441417	0	0	0	0	0	0	0	0	0	0.237647	0	0	0	0	0	0	0	0	0	0	0	0	0	0.279683	0
lib230331_CATGGTATCTGAGATC-1	0	0	0	0.0888889	0.0510949	0	0	0	0	0	0	0	0	0	0	0	0	0.46595	0	0	0	0	0	0.332425	0	0	0	0	0	0	0	0	0	0.202353	0	0	0	0.308458	0	0	0	0	0	0.0888889	0.0510949	0	0	0	0
lib230331_CATTCTAGTGCCAAGA-1	0	0	0	0.0747475	0	0	0	0.224806	0	0	0	0	0	0	0	0.381148	0	0.362007	0	0.25	0	0.211494	0	0	0	0	0	0.407115	0	0	0.134868	0	0	0	0	0.333333	0	0.328358	0	0	0	0	0	0.0747475	0	0.224806	0	0	0
lib230331_CATTTCAAGTACTCGT-1	0	0	0	0.113131	0	0	0	0.174419	0	0	0	0.121372	0	0.15942	0	0	0	0.415771	0	0	0	0.0735632	0	0	0	0	0	0	0	0	0	0	0	0.155294	0	0	0	0	1	0	0	0	0	0.113131	0	0.174419	0	0.121372	0.15942
lib230331_CCACGAGAGCGTGCTC-1	0	0.0952381	0	0.0929293	0	0.206813	0	0	0	0	0.25066	0	0	0	0	0	0	0	0	0.231061	0	0.110345	0	0.155313	0	0	0	0	0	0.24569	0	0	0	0.0823529	0	0	0	0	0	0	0	0	0.0952381	0.0929293	0.206813	0	0	0.25066	0
lib230331_CCACGAGAGTGTTCAC-1	0	0	0	0.0888889	0.0510949	0	0	0	0	0	0	0	0	0	0	0	0	0.46595	0	0	0	0	0	0.332425	0	0	0	0	0	0	0	0	0	0.202353	0	0	0	0.308458	0	0	0	0	0	0.0888889	0.0510949	0	0	0	0
lib230331_CCACTTGAGAAACTAC-1	0	0	0	0.113131	0	0	0	0.174419	0	0	0	0.121372	0	0.15942	0	0	0	0.415771	0	0	0	0.0735632	0	0	0	0	0	0	0	0	0	0	0	0.155294	0	0	0	0	1	0	0	0	0	0.113131	0	0.174419	0	0.121372	0.15942
lib230331_CCACTTGTCGCTATTT-1	0	0	0	0.0888889	0.0510949	0	0	0	0	0	0	0	0	0	0	0	0	0.46595	0	0	0	0	0	0.332425	0	0	0	0	0	0	0	0	0	0.202353	0	0	0	0.308458	0	0	0	0	0	0.0888889	0.0510949	0	0	0	0
lib230331_CCCAACTCATCGAGCC-1	0	0	0	0.0747475	0	0	0	0.224806	0	0	0	0	0	0	0	0.381148	0	0.362007	0	0.25	0	0.211494	0	0	0	0	0	0.407115	0	0	0.134868	0	0	0	0	0.333333	0	0.328358	0	0	0	0	0	0.0747475	0	0.224806	0	0	0
lib230331_CCCGGAACAAGGAGTC-1	0	0	0	0.113131	0	0	0	0.174419	0	0	0	0.121372	0	0.15942	0	0	0	0.415771	0	0	0	0.0735632	0	0	0	0	0	0	0	0	0	0	0	0.155294	0	0	0	0	1	0	0	0	0	0.113131	0	0.174419	0	0.121372	0.15942
lib230331_CCCTAACAGTAACGAT-1	0	0.0952381	0	0.0929293	0	0.206813	0	0	0	0	0.25066	0	0	0	0	0	0	0	0	0.231061	0	0.110345	0	0.155313	0	0	0	0	0	0.24569	0	0	0	0.0823529	0	0	0	0	0	0	0	0	0.0952381	0.0929293	0.206813	0	0	0.25066	0
lib230331_CCCTAACGTCTTAGTG-1	0	0.0952381	0	0.0929293	0	0.206813	0	0	0	0	0.25066	0	0	0	0	0	0	0	0	0.231061	0	0.110345	0	0.155313	0	0	0	0	0	0.24569	0	0	0	0.0823529	0	0	0	0	0	0	0	0	0.0952381	0.0929293	0.206813	0	0	0.25066	0
lib230331_CCCTAACGTGATTAGA-1	0	0	0	0.0888889	0.0510949	0	0	0	0	0	0	0	0	0	0	0	0	0.46595	0	0	0	0	0	0.332425	0	0	0	0	0	0	0	0	0	0.202353	0	0	0	0.308458	0	0	0	0	0	0.0888889	0.0510949	0	0	0	0
lib230331_CCCTAACTCTACACAG-1	0.270748	0.062585	0	0	0	0.199513	0	0	0	0	0	0	0	0	0	0	0	0	0	0	0	0	0	0.217984	0	0.5	0	0	0	0	0	0	0	0	0	0.45614	0	0	0	0	0	0	0.333333	0	0.199513	0	0	0	0
lib230331_CCCTAACTCTATCCAT-1	0	0	0	0	0	0	0	0	0	0	0	0	0	0	0	0	0	0	0	0	0	0.0873563	0	0	0	0	0	0	0	0	0	0	0	0	0	0	0	0	0	0	0	0	0	0	0	0	0	0	0
lib230331_CCCTCAAAGACAAGCC-1	0	0	0	0	0	0	0	0	0	0	0.279683	0	0	0	0	0	0	0	0	0	0	0	0	0.441417	0	0	0	0	0	0	0	0	0	0.237647	0	0	0	0	0	0	0	0	0	0	0	0	0	0.279683	0
lib230331_CCCTGATAGTATCCTG-1	0	0	0	0	0	0	0	0	0	0	0.279683	0	0	0	0	0	0	0	0	0	0	0	0	0.441417	0	0	0	0	0	0	0	0	0	0.237647	0	0	0	0	0	0	0	0	0	0	0	0	0	0.279683	0
lib230331_CCGATCTTCATTTACC-1	0	0	0	0.113131	0	0	0	0.174419	0	0	0	0.121372	0	0.15942	0	0	0	0.415771	0	0	0	0.0735632	0	0	0	0	0	0	0	0	0	0	0	0.155294	0	0	0	0	1	0	0	0	0	0.113131	0	0.174419	0	0.121372	0.15942
lib230331_CCGTTCATCGCTCCTA-1	0	0	0	0.0888889	0.0510949	0	0	0	0	0	0	0	0	0	0	0	0	0.46595	0	0	0	0	0	0.332425	0	0	0	0	0	0	0	0	0	0.202353	0	0	0	0.308458	0	0	0	0	0	0.0888889	0.0510949	0	0	0	0
lib230331_CCTACGTTCACAGTGT-1	0	0	0	0.0888889	0.0510949	0	0	0	0	0	0	0	0	0	0	0	0	0.46595	0	0	0	0	0	0.332425	0	0	0	0	0	0	0	0	0	0.202353	0	0	0	0.308458	0	0	0	0	0	0.0888889	0.0510949	0	0	0	0
lib230331_CCTCAGTTCTTGCAAG-1	0.270748	0.062585	0	0	0	0.199513	0	0	0	0	0	0	0	0	0	0	0	0	0	0	0	0	0	0.217984	0	0.5	0	0	0	0	0	0	0	0	0	0.45614	0	0	0	0	0	0	0.333333	0	0.199513	0	0	0	0
lib230331_CCTCATGCAGACTGCC-1	0	0.0952381	0	0.0929293	0	0.206813	0	0	0	0	0.25066	0	0	0	0	0	0	0	0	0.231061	0	0.110345	0	0.155313	0	0	0	0	0	0.24569	0	0	0	0.0823529	0	0	0	0	0	0	0	0	0.0952381	0.0929293	0.206813	0	0	0.25066	0
lib230331_CCTCCAAGTGAGATTA-1	0	0	0	0.0888889	0.0510949	0	0	0	0	0	0	0	0	0	0	0	0	0.46595	0	0	0	0	0	0.332425	0	0	0	0	0	0	0	0	0	0.202353	0	0	0	0.308458	0	0	0	0	0	0.0888889	0.0510949	0	0	0	0
lib230331_CCTCTAGAGGAACGTC-1	0	0	0	0	0	0	0	0	0	0	0	0	0	0	0	0	0	0	0	0	0	0.0873563	0	0	0	0	0	0	0	0	0	0	0	0	0	0	0	0	0	0	0	0	0	0	0	0	0	0	0
lib230331_CCTCTCCTCACTCGAA-1	0	0	0	0.0888889	0.0510949	0	0	0	0	0	0	0	0	0	0	0	0	0.46595	0	0	0	0	0	0.332425	0	0	0	0	0	0	0	0	0	0.202353	0	0	0	0.308458	0	0	0	0	0	0.0888889	0.0510949	0	0	0	0
lib230331_CCTTGTGCATGTGACT-1	0	0	0	0	0	0	0	0	0	0	0.279683	0	0	0	0	0	0	0	0	0	0	0	0	0.441417	0	0	0	0	0	0	0	0	0	0.237647	0	0	0	0	0	0	0	0	0	0	0	0	0	0.279683	0
lib230331_CGAAGTTAGGGTACAC-1	0	0	0	0.0888889	0.0510949	0	0	0	0	0	0	0	0	0	0	0	0	0.46595	0	0	0	0	0	0.332425	0	0	0	0	0	0	0	0	0	0.202353	0	0	0	0.308458	0	0	0	0	0	0.0888889	0.0510949	0	0	0	0
lib230331_CGACAGCCAGACCGCT-1	0	0	0	0.0888889	0.0510949	0	0	0	0	0	0	0	0	0	0	0	0	0.46595	0	0	0	0	0	0.332425	0	0	0	0	0	0	0	0	0	0.202353	0	0	0	0.308458	0	0	0	0	0	0.0888889	0.0510949	0	0	0	0
lib230331_CGAGAAGAGAACTCCT-1	0	0	0	0	0	0	0	0	0	0	0.279683	0	0	0	0	0	0	0	0	0	0	0	0	0.441417	0	0	0	0	0	0	0	0	0	0.237647	0	0	0	0	0	0	0	0	0	0	0	0	0	0.279683	0
lib230331_CGAGGCTCATCCGATA-1	0	0.0952381	0	0.0929293	0	0.206813	0	0	0	0	0.25066	0	0	0	0	0	0	0	0	0.231061	0	0.110345	0	0.155313	0	0	0	0	0	0.24569	0	0	0	0.0823529	0	0	0	0	0	0	0	0	0.0952381	0.0929293	0.206813	0	0	0.25066	0
lib230331_CGAGTGCAGCTGACAG-1	0	0	0	0	0	0	0	0	0	0	0.279683	0	0	0	0	0	0	0	0	0	0	0	0	0.441417	0	0	0	0	0	0	0	0	0	0.237647	0	0	0	0	0	0	0	0	0	0	0	0	0	0.279683	0
lib230331_CGATGCGAGGCGCTCT-1	0	0	0	0.0747475	0	0	0	0.224806	0	0	0	0	0	0	0	0.381148	0	0.362007	0	0.25	0	0.211494	0	0	0	0	0	0.407115	0	0	0.134868	0	0	0	0	0.333333	0	0.328358	0	0	0	0	0	0.0747475	0	0.224806	0	0	0
lib230331_CGCATAATCTAATTCC-1	0	0	0	0.0888889	0.0510949	0	0	0	0	0	0	0	0	0	0	0	0	0.46595	0	0	0	0	0	0.332425	0	0	0	0	0	0	0	0	0	0.202353	0	0	0	0.308458	0	0	0	0	0	0.0888889	0.0510949	0	0	0	0
lib230331_CGCCAGAGTTACGCCG-1	0	0.0952381	0	0.0929293	0	0.206813	0	0	0	0	0.25066	0	0	0	0	0	0	0	0	0.231061	0	0.110345	0	0.155313	0	0	0	0	0	0.24569	0	0	0	0.0823529	0	0	0	0	0	0	0	0	0.0952381	0.0929293	0.206813	0	0	0.25066	0
lib230331_CGCCATTCACAGTACT-1	0	0	0	0	0	0	0	0	0	0	0	0	0	0	0	0	0	0	0	0	0	0.0873563	0	0	0	0	0	0	0	0	0	0	0	0	0	0	0	0	0	0	0	0	0	0	0	0	0	0	0
lib230331_CGGAACCCAAACCGGA-1	0.270748	0.062585	0	0	0	0.199513	0	0	0	0	0	0	0	0	0	0	0	0	0	0	0	0	0	0.217984	0	0.5	0	0	0	0	0	0	0	0	0	0.45614	0	0	0	0	0	0	0.333333	0	0.199513	0	0	0	0
lib230331_CGGACACTCTGCTAGA-1	0	0	0	0.0747475	0	0	0	0.224806	0	0	0	0	0	0	0	0.381148	0	0.362007	0	0.25	0	0.211494	0	0	0	0	0	0.407115	0	0	0.134868	0	0	0	0	0.333333	0	0.328358	0	0	0	0	0	0.0747475	0	0.224806	0	0	0
lib230331_CGGGACTGTCTTGGTA-1	0	0	0	0	0	0	0	0	0	0	0.279683	0	0	0	0	0	0	0	0	0	0	0	0	0.441417	0	0	0	0	0	0	0	0	0	0.237647	0	0	0	0	0	0	0	0	0	0	0	0	0	0.279683	0
lib230331_CGGGACTTCAACGAGG-1	0.270748	0.062585	0	0	0	0.199513	0	0	0	0	0	0	0	0	0	0	0	0	0	0	0	0	0	0.217984	0	0.5	0	0	0	0	0	0	0	0	0	0.45614	0	0	0	0	0	0	0.333333	0	0.199513	0	0	0	0
lib230331_CGTCAAACAAATGCTC-1	0	0	0	0	0	0	0	0	0	0	0.279683	0	0	0	0	0	0	0	0	0	0	0	0	0.441417	0	0	0	0	0	0	0	0	0	0.237647	0	0	0	0	0	0	0	0	0	0	0	0	0	0.279683	0
lib230331_CGTGATACAGGAGGTT-1	0	0	0	0	0	0	0	0	0	0	0.279683	0	0	0	0	0	0	0	0	0	0	0	0	0.441417	0	0	0	0	0	0	0	0	0	0.237647	0	0	0	0	0	0	0	0	0	0	0	0	0	0.279683	0
lib230331_CGTTAGATCAACTTTC-1	0	0	0	0.0747475	0	0	0	0.224806	0	0	0	0	0	0	0	0.381148	0	0.362007	0	0.25	0	0.211494	0	0	0	0	0	0.407115	0	0	0.134868	0	0	0	0	0.333333	0	0.328358	0	0	0	0	0	0.0747475	0	0.224806	0	0	0
lib230331_CGTTCTGAGCTTTCTT-1	0.270748	0.062585	0	0	0	0.199513	0	0	0	0	0	0	0	0	0	0	0	0	0	0	0	0	0	0.217984	0	0.5	0	0	0	0	0	0	0	0	0	0.45614	0	0	0	0	0	0	0.333333	0	0.199513	0	0	0	0
lib230331_CGTTGGGCACTAGGCC-1	0	0	0	0	0	0	0	0	0	0	0	0	0	0	0	0	0	0	0	0	0	0.0873563	0	0	0	0	0	0	0	0	0	0	0	0	0	0	0	0	0	0	0	0	0	0	0	0	0	0	0
lib230331_CGTTGGGTCTGTCAGA-1	0	0	0	0	0	0	0	0	0	0	0	0	0	0	0	0	0	0	0	0	0	0.0873563	0	0	0	0	0	0	0	0	0	0	0	0	0	0	0	0	0	0	0	0	0	0	0	0	0	0	0
lib230331_CTAACCCCACAGAAGC-1	0	0	0	0	0	0	0	0	0	0	0	0	0	0	0	0	0	0	0	0	0	0.0873563	0	0	0	0	0	0	0	0	0	0	0	0	0	0	0	0	0	0	0	0	0	0	0	0	0	0	0
lib230331_CTAACTTCATGTTTGG-1	0	0	0	0.0747475	0	0	0	0.224806	0	0	0	0	0	0	0	0.381148	0	0.362007	0	0.25	0	0.211494	0	0	0	0	0	0.407115	0	0	0.134868	0	0	0	0	0.333333	0	0.328358	0	0	0	0	0	0.0747475	0	0.224806	0	0	0
lib230331_CTAAGTGCAAGTGCTT-1	0	0	0	0.0888889	0.0510949	0	0	0	0	0	0	0	0	0	0	0	0	0.46595	0	0	0	0	0	0.332425	0	0	0	0	0	0	0	0	0	0.202353	0	0	0	0.308458	0	0	0	0	0	0.0888889	0.0510949	0	0	0	0
lib230331_CTAAGTGTCGGCACTG-1	0	0	0	0.0747475	0	0	0	0.224806	0	0	0	0	0	0	0	0.381148	0	0.362007	0	0.25	0	0.211494	0	0	0	0	0	0.407115	0	0	0.134868	0	0	0	0	0.333333	0	0.328358	0	0	0	0	0	0.0747475	0	0.224806	0	0	0
lib230331_CTACTATGTGCGGTAA-1	0	0	0	0.0888889	0.0510949	0	0	0	0	0	0	0	0	0	0	0	0	0.46595	0	0	0	0	0	0.332425	0	0	0	0	0	0	0	0	0	0.202353	0	0	0	0.308458	0	0	0	0	0	0.0888889	0.0510949	0	0	0	0
lib230331_CTCAACCGTTTGAAAG-1	0	0	0	0	0	0	0	0	0	0	0.279683	0	0	0	0	0	0	0	0	0	0	0	0	0.441417	0	0	0	0	0	0	0	0	0	0.237647	0	0	0	0	0	0	0	0	0	0	0	0	0	0.279683	0
lib230331_CTCACTGCAACGGCTC-1	0	0	0	0	0	0	0	0	0	0	0	0	0	0	0	0	0	0	0	0	0	0.0873563	0	0	0	0	0	0	0	0	0	0	0	0	0	0	0	0	0	0	0	0	0	0	0	0	0	0	0
lib230331_CTCAGGGCAGAGAAAG-1	0.270748	0.062585	0	0	0	0.199513	0	0	0	0	0	0	0	0	0	0	0	0	0	0	0	0	0	0.217984	0	0.5	0	0	0	0	0	0	0	0	0	0.45614	0	0	0	0	0	0	0.333333	0	0.199513	0	0	0	0
lib230331_CTCCACACACACGTGC-1	0.270748	0.062585	0	0	0	0.199513	0	0	0	0	0	0	0	0	0	0	0	0	0	0	0	0	0	0.217984	0	0.5	0	0	0	0	0	0	0	0	0	0.45614	0	0	0	0	0	0	0.333333	0	0.199513	0	0	0	0
lib230331_CTCCCTCAGCTTTCCC-1	0	0	0	0	0	0	0	0	0	0	0	0	0	0	0	0	0	0	0	0	0	0.0873563	0	0	0	0	0	0	0	0	0	0	0	0	0	0	0	0	0	0	0	0	0	0	0	0	0	0	0
lib230331_CTCCTTTGTAACTAAG-1	0	0	0	0	0	0	0	0	0	0	0	0	0	0	0	0	0	0	0	0	0	0.0873563	0	0	0	0	0	0	0	0	0	0	0	0	0	0	0	0	0	0	0	0	0	0	0	0	0	0	0
lib230331_CTCTGGTCAAGGTCTT-1	0.270748	0.062585	0	0	0	0.199513	0	0	0	0	0	0	0	0	0	0	0	0	0	0	0	0	0	0.217984	0	0.5	0	0	0	0	0	0	0	0	0	0.45614	0	0	0	0	0	0	0.333333	0	0.199513	0	0	0	0
lib230331_CTGCATCCATGTAACC-1	0	0	0	0.0888889	0.0510949	0	0	0	0	0	0	0	0	0	0	0	0	0.46595	0	0	0	0	0	0.332425	0	0	0	0	0	0	0	0	0	0.202353	0	0	0	0.308458	0	0	0	0	0	0.0888889	0.0510949	0	0	0	0
lib230331_CTGCATCGTCCCTGTT-1	0	0	0	0	0	0	0	0	0	0	0	0	0	0	0	0	0	0	0	0	0	0.0873563	0	0	0	0	0	0	0	0	0	0	0	0	0	0	0	0	0	0	0	0	0	0	0	0	0	0	0
lib230331_CTGGACGTCGGCGATC-1	0	0	0	0.0888889	0.0510949	0	0	0	0	0	0	0	0	0	0	0	0	0.46595	0	0	0	0	0	0.332425	0	0	0	0	0	0	0	0	0	0.202353	0	0	0	0.308458	0	0	0	0	0	0.0888889	0.0510949	0	0	0	0
lib230331_CTGTAGACAGCGCTTG-1	0.288435	0.360544	0.0787879	0.341414	0	0.690998	0	0.751938	0.308917	0.417197	0.263852	0.242744	0	0.318841	0	0.758197	0.139785	0.458781	0	0.80303	0.445977	0.248276	0.506812	0.280654	0	1	0	0.29249	0	0.534483	0.5	0	0.536471	0.164706	0	1	0.298507	0	0	1	0.265432	0	0.64898	0.420202	0.690998	0.751938	0.726115	0.506596	0.318841
lib230331_CTTAGGAAGGGTTGCA-1	0.270748	0.062585	0	0	0	0.199513	0	0	0	0	0	0	0	0	0	0	0	0	0	0	0	0	0	0.217984	0	0.5	0	0	0	0	0	0	0	0	0	0.45614	0	0	0	0	0	0	0.333333	0	0.199513	0	0	0	0
lib230331_CTTCCGAGTGGATCGA-1	0	0	0	0.0747475	0	0	0	0.224806	0	0	0	0	0	0	0	0.381148	0	0.362007	0	0.25	0	0.211494	0	0	0	0	0	0.407115	0	0	0.134868	0	0	0	0	0.333333	0	0.328358	0	0	0	0	0	0.0747475	0	0.224806	0	0	0
lib230331_CTTCGGTGTCTCAGAT-1	0	0	0	0.0888889	0.0510949	0	0	0	0	0	0	0	0	0	0	0	0	0.46595	0	0	0	0	0	0.332425	0	0	0	0	0	0	0	0	0	0.202353	0	0	0	0.308458	0	0	0	0	0	0.0888889	0.0510949	0	0	0	0
lib230331_CTTCTCTTCAGACCTA-1	0	0	0	0	0	0	0	0	0	0	0	0	0	0	0	0	0	0	0	0	0	0.0873563	0	0	0	0	0	0	0	0	0	0	0	0	0	0	0	0	0	0	0	0	0	0	0	0	0	0	0
lib230331_GAACGTTAGAGCCATG-1	0	0	0	0	0	0	0	0	0	0	0.279683	0	0	0	0	0	0	0	0	0	0	0	0	0.441417	0	0	0	0	0	0	0	0	0	0.237647	0	0	0	0	0	0	0	0	0	0	0	0	0	0.279683	0
lib230331_GAACGTTTCTTAGTTC-1	0	0	0	0	0	0	0	0	0	0	0.279683	0	0	0	0	0	0	0	0	0	0	0	0	0.441417	0	0	0	0	0	0	0	0	0	0.237647	0	0	0	0	0	0	0	0	0	0	0	0	0	0.279683	0
lib230331_GAAGGGTAGAGGCTGT-1	0	0	0	0.113131	0	0	0	0.174419	0	0	0	0.121372	0	0.15942	0	0	0	0.415771	0	0	0	0.0735632	0	0	0	0	0	0	0	0	0	0	0	0.155294	0	0	0	0	1	0	0	0	0	0.113131	0	0.174419	0	0.121372	0.15942
lib230331_GAAGTAATCTTACCGC-1	0	0	0	0	0	0	0	0	0	0	0	0	0	0	0	0	0	0	0	0	0	0.0873563	0	0	0	0	0	0	0	0	0	0	0	0	0	0	0	0	0	0	0	0	0	0	0	0	0	0	0
lib230331_GACACGCCAGCACCCA-1	0	0	0	0	0	0	0	0	0	0	0	0	0	0	0	0	0	0	0	0	0	0.0873563	0	0	0	0	0	0	0	0	0	0	0	0	0	0	0	0	0	0	0	0	0	0	0	0	0	0	0
lib230331_GACATCAAGTTTCGGT-1	0.288435	0.360544	0.0787879	0.341414	0	0.690998	0	0.751938	0.308917	0.417197	0.263852	0.242744	0	0.318841	0	0.758197	0.139785	0.458781	0	0.80303	0.445977	0.248276	0.506812	0.280654	0	1	0	0.29249	0	0.534483	0.5	0	0.536471	0.164706	0	1	0.298507	0	0	1	0.265432	0	0.64898	0.420202	0.690998	0.751938	0.726115	0.506596	0.318841
lib230331_GACCAATTCCGATTAG-1	0	0	0	0	0	0	0	0	0	0	0.279683	0	0	0	0	0	0	0	0	0	0	0	0	0.441417	0	0	0	0	0	0	0	0	0	0.237647	0	0	0	0	0	0	0	0	0	0	0	0	0	0.279683	0
lib230331_GACCTTCCAGGTGACA-1	0	0	0	0	0	0	0	0	0	0	0	0	0	0	0	0	0	0	0	0	0	0.0873563	0	0	0	0	0	0	0	0	0	0	0	0	0	0	0	0	0	0	0	0	0	0	0	0	0	0	0
lib230331_GACTCTCCATATACCG-1	0	0	0	0.113131	0	0	0	0.174419	0	0	0	0.121372	0	0.15942	0	0	0	0.415771	0	0	0	0.0735632	0	0	0	0	0	0	0	0	0	0	0	0.155294	0	0	0	0	1	0	0	0	0	0.113131	0	0.174419	0	0.121372	0.15942
lib230331_GACTTCCAGACATATG-1	0	0	0	0	0	0	0	0	0	0	0	0	0	0	0	0	0	0	0	0	0	0.0873563	0	0	0	0	0	0	0	0	0	0	0	0	0	0	0	0	0	0	0	0	0	0	0	0	0	0	0
lib230331_GACTTCCAGTGCAAAT-1	0	0	0	0.0747475	0	0	0	0.224806	0	0	0	0	0	0	0	0.381148	0	0.362007	0	0.25	0	0.211494	0	0	0	0	0	0.407115	0	0	0.134868	0	0	0	0	0.333333	0	0.328358	0	0	0	0	0	0.0747475	0	0.224806	0	0	0
lib230331_GAGACTTCAGGATCTT-1	0	0	0	0	0	0	0	0	0	0	0.279683	0	0	0	0	0	0	0	0	0	0	0	0	0.441417	0	0	0	0	0	0	0	0	0	0.237647	0	0	0	0	0	0	0	0	0	0	0	0	0	0.279683	0
lib230331_GAGAGGTTCCACTGGG-1	0	0	0	0.113131	0	0	0	0.174419	0	0	0	0.121372	0	0.15942	0	0	0	0.415771	0	0	0	0.0735632	0	0	0	0	0	0	0	0	0	0	0	0.155294	0	0	0	0	1	0	0	0	0	0.113131	0	0.174419	0	0.121372	0.15942
lib230331_GAGATGGCATCCTTGC-1	0.270748	0.062585	0	0	0	0.199513	0	0	0	0	0	0	0	0	0	0	0	0	0	0	0	0	0	0.217984	0	0.5	0	0	0	0	0	0	0	0	0	0.45614	0	0	0	0	0	0	0.333333	0	0.199513	0	0	0	0
lib230331_GAGCTGCGTAAGTTAG-1	0	0	0	0	0	0	0	0	0	0	0	0	0	0	0	0	0	0	0	0	0	0.0873563	0	0	0	0	0	0	0	0	0	0	0	0	0	0	0	0	0	0	0	0	0	0	0	0	0	0	0
lib230331_GAGGCCTAGCCTGAGA-1	0	0	0	0.0888889	0.0510949	0	0	0	0	0	0	0	0	0	0	0	0	0.46595	0	0	0	0	0	0.332425	0	0	0	0	0	0	0	0	0	0.202353	0	0	0	0.308458	0	0	0	0	0	0.0888889	0.0510949	0	0	0	0
lib230331_GAGGGATAGAAGTATC-1	0	0	0	0.0888889	0.0510949	0	0	0	0	0	0	0	0	0	0	0	0	0.46595	0	0	0	0	0	0.332425	0	0	0	0	0	0	0	0	0	0.202353	0	0	0	0.308458	0	0	0	0	0	0.0888889	0.0510949	0	0	0	0
lib230331_GAGTCTATCCAGTACA-1	0	0	0	0.113131	0	0	0	0.174419	0	0	0	0.121372	0	0.15942	0	0	0	0.415771	0	0	0	0.0735632	0	0	0	0	0	0	0	0	0	0	0	0.155294	0	0	0	0	1	0	0	0	0	0.113131	0	0.174419	0	0.121372	0.15942
lib230331_GATGATCTCATAGGCT-1	0	0	0	0	0	0	0	0	0	0	0.279683	0	0	0	0	0	0	0	0	0	0	0	0	0.441417	0	0	0	0	0	0	0	0	0	0.237647	0	0	0	0	0	0	0	0	0	0	0	0	0	0.279683	0
lib230331_GATGTTGCACATACGT-1	0	0	0	0.0888889	0.0510949	0	0	0	0	0	0	0	0	0	0	0	0	0.46595	0	0	0	0	0	0.332425	0	0	0	0	0	0	0	0	0	0.202353	0	0	0	0.308458	0	0	0	0	0	0.0888889	0.0510949	0	0	0	0
lib230331_GATTTCTGTACTAACC-1	0	0	0	0	0	0	0	0	0	0	0	0	0	0	0	0	0	0	0	0	0	0.0873563	0	0	0	0	0	0	0	0	0	0	0	0	0	0	0	0	0	0	0	0	0	0	0	0	0	0	0
lib230331_GCACATACAGCGACCT-1	0	0	0	0.0888889	0.0510949	0	0	0	0	0	0	0	0	0	0	0	0	0.46595	0	0	0	0	0	0.332425	0	0	0	0	0	0	0	0	0	0.202353	0	0	0	0.308458	0	0	0	0	0	0.0888889	0.0510949	0	0	0	0
lib230331_GCACATATCGCTTACC-1	0	0	0	0	0	0	0	0	0	0	0.279683	0	0	0	0	0	0	0	0	0	0	0	0	0.441417	0	0	0	0	0	0	0	0	0	0.237647	0	0	0	0	0	0	0	0	0	0	0	0	0	0.279683	0
lib230331_GCAGGCTAGTAGGTTA-1	0	0	0	0.0888889	0.0510949	0	0	0	0	0	0	0	0	0	0	0	0	0.46595	0	0	0	0	0	0.332425	0	0	0	0	0	0	0	0	0	0.202353	0	0	0	0.308458	0	0	0	0	0	0.0888889	0.0510949	0	0	0	0
lib230331_GCATCGGCACCTCTGT-1	0	0	0	0.113131	0	0	0	0.174419	0	0	0	0.121372	0	0.15942	0	0	0	0.415771	0	0	0	0.0735632	0	0	0	0	0	0	0	0	0	0	0	0.155294	0	0	0	0	1	0	0	0	0	0.113131	0	0.174419	0	0.121372	0.15942
lib230331_GCCATGGAGCCTCCAG-1	0.270748	0.062585	0	0	0	0.199513	0	0	0	0	0	0	0	0	0	0	0	0	0	0	0	0	0	0.217984	0	0.5	0	0	0	0	0	0	0	0	0	0.45614	0	0	0	0	0	0	0.333333	0	0.199513	0	0	0	0
lib230331_GCCATGGCAAATTGGA-1	0.270748	0.062585	0	0	0	0.199513	0	0	0	0	0	0	0	0	0	0	0	0	0	0	0	0	0	0.217984	0	0.5	0	0	0	0	0	0	0	0	0	0.45614	0	0	0	0	0	0	0.333333	0	0.199513	0	0	0	0
lib230331_GCCATGGCATCATGAC-1	0	0.0952381	0	0.0929293	0	0.206813	0	0	0	0	0.25066	0	0	0	0	0	0	0	0	0.231061	0	0.110345	0	0.155313	0	0	0	0	0	0.24569	0	0	0	0.0823529	0	0	0	0	0	0	0	0	0.0952381	0.0929293	0.206813	0	0	0.25066	0
lib230331_GCCATGGGTTTGGGTT-1	0	0	0	0.113131	0	0	0	0.174419	0	0	0	0.121372	0	0.15942	0	0	0	0.415771	0	0	0	0.0735632	0	0	0	0	0	0	0	0	0	0	0	0.155294	0	0	0	0	1	0	0	0	0	0.113131	0	0.174419	0	0.121372	0.15942
lib230331_GCCATTCTCCCTTGTG-1	0	0	0	0	0	0	0	0	0	0	0	0	0	0	0	0	0	0	0	0	0	0.0873563	0	0	0	0	0	0	0	0	0	0	0	0	0	0	0	0	0	0	0	0	0	0	0	0	0	0	0
lib230331_GCCCAGAAGGCTCAAG-1	0.270748	0.062585	0	0	0	0.199513	0	0	0	0	0	0	0	0	0	0	0	0	0	0	0	0	0	0.217984	0	0.5	0	0	0	0	0	0	0	0	0	0.45614	0	0	0	0	0	0	0.333333	0	0.199513	0	0	0	0
lib230331_GCCCAGATCTCCAAGA-1	0	0	0	0.0747475	0	0	0	0.224806	0	0	0	0	0	0	0	0.381148	0	0.362007	0	0.25	0	0.211494	0	0	0	0	0	0.407115	0	0	0.134868	0	0	0	0	0.333333	0	0.328358	0	0	0	0	0	0.0747475	0	0.224806	0	0	0
lib230331_GCCTGTTCAGTTGGTT-1	0	0	0	0.0888889	0.0510949	0	0	0	0	0	0	0	0	0	0	0	0	0.46595	0	0	0	0	0	0.332425	0	0	0	0	0	0	0	0	0	0.202353	0	0	0	0.308458	0	0	0	0	0	0.0888889	0.0510949	0	0	0	0
lib230331_GCGATCGTCTACCTTA-1	0	0	0	0.113131	0	0	0	0.174419	0	0	0	0.121372	0	0.15942	0	0	0	0.415771	0	0	0	0.0735632	0	0	0	0	0	0	0	0	0	0	0	0.155294	0	0	0	0	1	0	0	0	0	0.113131	0	0.174419	0	0.121372	0.15942
lib230331_GCGTGCAGTCCAGCCA-1	0	0	0	0.0888889	0.0510949	0	0	0	0	0	0	0	0	0	0	0	0	0.46595	0	0	0	0	0	0.332425	0	0	0	0	0	0	0	0	0	0.202353	0	0	0	0.308458	0	0	0	0	0	0.0888889	0.0510949	0	0	0	0
lib230331_GCGTTTCAGAGTGTGC-1	0	0	0	0.0888889	0.0510949	0	0	0	0	0	0	0	0	0	0	0	0	0.46595	0	0	0	0	0	0.332425	0	0	0	0	0	0	0	0	0	0.202353	0	0	0	0.308458	0	0	0	0	0	0.0888889	0.0510949	0	0	0	0
lib230331_GCTACAAGTAATGTGA-1	0	0	0	0.0747475	0	0	0	0.224806	0	0	0	0	0	0	0	0.381148	0	0.362007	0	0.25	0	0.211494	0	0	0	0	0	0.407115	0	0	0.134868	0	0	0	0	0.333333	0	0.328358	0	0	0	0	0	0.0747475	0	0.224806	0	0	0
lib230331_GCTACAATCGTTCTAT-1	0	0	0	0.0747475	0	0	0	0.224806	0	0	0	0	0	0	0	0.381148	0	0.362007	0	0.25	0	0.211494	0	0	0	0	0	0.407115	0	0	0.134868	0	0	0	0	0.333333	0	0.328358	0	0	0	0	0	0.0747475	0	0.224806	0	0	0
lib230331_GCTACCTTCGAATGCT-1	0.270748	0.062585	0	0	0	0.199513	0	0	0	0	0	0	0	0	0	0	0	0	0	0	0	0	0	0.217984	0	0.5	0	0	0	0	0	0	0	0	0	0.45614	0	0	0	0	0	0	0.333333	0	0.199513	0	0	0	0
lib230331_GCTGAATGTACCTATG-1	0.270748	0.062585	0	0	0	0.199513	0	0	0	0	0	0	0	0	0	0	0	0	0	0	0	0	0	0.217984	0	0.5	0	0	0	0	0	0	0	0	0	0.45614	0	0	0	0	0	0	0.333333	0	0.199513	0	0	0	0
lib230331_GCTGGGTGTATCCTTT-1	0.270748	0.062585	0	0	0	0.199513	0	0	0	0	0	0	0	0	0	0	0	0	0	0	0	0	0	0.217984	0	0.5	0	0	0	0	0	0	0	0	0	0.45614	0	0	0	0	0	0	0.333333	0	0.199513	0	0	0	0
lib230331_GGATGTTGTAATCAAG-1	0.270748	0.062585	0	0	0	0.199513	0	0	0	0	0	0	0	0	0	0	0	0	0	0	0	0	0	0.217984	0	0.5	0	0	0	0	0	0	0	0	0	0.45614	0	0	0	0	0	0	0.333333	0	0.199513	0	0	0	0
lib230331_GGCGTCAAGAATTGTG-1	0	0	0	0.0888889	0.0510949	0	0	0	0	0	0	0	0	0	0	0	0	0.46595	0	0	0	0	0	0.332425	0	0	0	0	0	0	0	0	0	0.202353	0	0	0	0.308458	0	0	0	0	0	0.0888889	0.0510949	0	0	0	0
lib230331_GGCTTGGCAGCGAGTA-1	0	0	0	0	0	0	0	0	0	0	0.279683	0	0	0	0	0	0	0	0	0	0	0	0	0.441417	0	0	0	0	0	0	0	0	0	0.237647	0	0	0	0	0	0	0	0	0	0	0	0	0	0.279683	0
lib230331_GGGACAACATTGCCTC-1	0	0	0	0	0	0	0	0	0	0	0	0	0	0	0	0	0	0	0	0	0	0.0873563	0	0	0	0	0	0	0	0	0	0	0	0	0	0	0	0	0	0	0	0	0	0	0	0	0	0	0
lib230331_GGGACAATCGTCCATC-1	0	0	0	0	0	0	0	0	0	0	0.279683	0	0	0	0	0	0	0	0	0	0	0	0	0.441417	0	0	0	0	0	0	0	0	0	0.237647	0	0	0	0	0	0	0	0	0	0	0	0	0	0.279683	0
lib230331_GGGACCTGTTGCATGT-1	0	0	0	0.0888889	0.0510949	0	0	0	0	0	0	0	0	0	0	0	0	0.46595	0	0	0	0	0	0.332425	0	0	0	0	0	0	0	0	0	0.202353	0	0	0	0.308458	0	0	0	0	0	0.0888889	0.0510949	0	0	0	0
lib230331_GGGATGATCTATCACT-1	0	0.0952381	0	0.0929293	0	0.206813	0	0	0	0	0.25066	0	0	0	0	0	0	0	0	0.231061	0	0.110345	0	0.155313	0	0	0	0	0	0.24569	0	0	0	0.0823529	0	0	0	0	0	0	0	0	0.0952381	0.0929293	0.206813	0	0	0.25066	0
lib230331_GGGCCATGTATCCTCC-1	0	0	0	0	0	0	0	0	0	0	0.279683	0	0	0	0	0	0	0	0	0	0	0	0	0.441417	0	0	0	0	0	0	0	0	0	0.237647	0	0	0	0	0	0	0	0	0	0	0	0	0	0.279683	0
lib230331_GGGCCATTCGAACGCC-1	0.270748	0.062585	0	0	0	0.199513	0	0	0	0	0	0	0	0	0	0	0	0	0	0	0	0	0	0.217984	0	0.5	0	0	0	0	0	0	0	0	0	0.45614	0	0	0	0	0	0	0.333333	0	0.199513	0	0	0	0
lib230331_GGGTCACGTCCAAGAG-1	0.270748	0.062585	0	0	0	0.199513	0	0	0	0	0	0	0	0	0	0	0	0	0	0	0	0	0	0.217984	0	0.5	0	0	0	0	0	0	0	0	0	0.45614	0	0	0	0	0	0	0.333333	0	0.199513	0	0	0	0
lib230331_GGGTGTCTCCATTCAT-1	0.288435	0.360544	0.0787879	0.341414	0	0.690998	0	0.751938	0.308917	0.417197	0.263852	0.242744	0	0.318841	0	0.758197	0.139785	0.458781	0	0.80303	0.445977	0.248276	0.506812	0.280654	0	1	0	0.29249	0	0.534483	0.5	0	0.536471	0.164706	0	1	0.298507	0	0	1	0.265432	0	0.64898	0.420202	0.690998	0.751938	0.726115	0.506596	0.318841
lib230331_GGGTGTCTCGAGAACG-1	0	0	0	0.0888889	0.0510949	0	0	0	0	0	0	0	0	0	0	0	0	0.46595	0	0	0	0	0	0.332425	0	0	0	0	0	0	0	0	0	0.202353	0	0	0	0.308458	0	0	0	0	0	0.0888889	0.0510949	0	0	0	0
lib230331_GGGTTATAGGTACAAT-1	0	0	0	0	0	0	0	0	0	0	0.279683	0	0	0	0	0	0	0	0	0	0	0	0	0.441417	0	0	0	0	0	0	0	0	0	0.237647	0	0	0	0	0	0	0	0	0	0	0	0	0	0.279683	0
lib230331_GGTCTGGGTGAGCGAT-1	0	0	0	0	0	0	0	0	0	0	0.279683	0	0	0	0	0	0	0	0	0	0	0	0	0.441417	0	0	0	0	0	0	0	0	0	0.237647	0	0	0	0	0	0	0	0	0	0	0	0	0	0.279683	0
lib230331_GGTGTTACAACTAGAA-1	0.270748	0.062585	0	0	0	0.199513	0	0	0	0	0	0	0	0	0	0	0	0	0	0	0	0	0	0.217984	0	0.5	0	0	0	0	0	0	0	0	0	0.45614	0	0	0	0	0	0	0.333333	0	0.199513	0	0	0	0
lib230331_GGTGTTAGTCAGGCAA-1	0	0	0	0	0	0	0	0	0	0	0.279683	0	0	0	0	0	0	0	0	0	0	0	0	0.441417	0	0	0	0	0	0	0	0	0	0.237647	0	0	0	0	0	0	0	0	0	0	0	0	0	0.279683	0
lib230331_GTAACACAGGGAACAA-1	0.270748	0.062585	0	0	0	0.199513	0	0	0	0	0	0	0	0	0	0	0	0	0	0	0	0	0	0.217984	0	0.5	0	0	0	0	0	0	0	0	0	0.45614	0	0	0	0	0	0	0.333333	0	0.199513	0	0	0	0
lib230331_GTAAGTCCAGAGAAAG-1	0.270748	0.062585	0	0	0	0.199513	0	0	0	0	0	0	0	0	0	0	0	0	0	0	0	0	0	0.217984	0	0.5	0	0	0	0	0	0	0	0	0	0.45614	0	0	0	0	0	0	0.333333	0	0.199513	0	0	0	0
lib230331_GTAAGTCGTCAACGCC-1	0	0	0	0.113131	0	0	0	0.174419	0	0	0	0.121372	0	0.15942	0	0	0	0.415771	0	0	0	0.0735632	0	0	0	0	0	0	0	0	0	0	0	0.155294	0	0	0	0	1	0	0	0	0	0.113131	0	0.174419	0	0.121372	0.15942
lib230331_GTAATCGAGTTGCCCG-1	0	0	0	0.0747475	0	0	0	0.224806	0	0	0	0	0	0	0	0.381148	0	0.362007	0	0.25	0	0.211494	0	0	0	0	0	0.407115	0	0	0.134868	0	0	0	0	0.333333	0	0.328358	0	0	0	0	0	0.0747475	0	0.224806	0	0	0
lib230331_GTAATGCTCGCTAGCG-1	0	0	0	0	0	0	0	0	0	0	0.279683	0	0	0	0	0	0	0	0	0	0	0	0	0.441417	0	0	0	0	0	0	0	0	0	0.237647	0	0	0	0	0	0	0	0	0	0	0	0	0	0.279683	0
lib230331_GTAGAGGCACCCTTGT-1	0	0	0	0.0888889	0.0510949	0	0	0	0	0	0	0	0	0	0	0	0	0.46595	0	0	0	0	0	0.332425	0	0	0	0	0	0	0	0	0	0.202353	0	0	0	0.308458	0	0	0	0	0	0.0888889	0.0510949	0	0	0	0
lib230331_GTAGATCGTCTCACGG-1	0	0.0952381	0	0.0929293	0	0.206813	0	0	0	0	0.25066	0	0	0	0	0	0	0	0	0.231061	0	0.110345	0	0.155313	0	0	0	0	0	0.24569	0	0	0	0.0823529	0	0	0	0	0	0	0	0	0.0952381	0.0929293	0.206813	0	0	0.25066	0
lib230331_GTAGATCGTTAAGACA-1	0	0	0	0.113131	0	0	0	0.174419	0	0	0	0.121372	0	0.15942	0	0	0	0.415771	0	0	0	0.0735632	0	0	0	0	0	0	0	0	0	0	0	0.155294	0	0	0	0	1	0	0	0	0	0.113131	0	0.174419	0	0.121372	0.15942
lib230331_GTAGATCGTTTCAGAC-1	0	0	0	0	0	0	0	0	0	0	0.279683	0	0	0	0	0	0	0	0	0	0	0	0	0.441417	0	0	0	0	0	0	0	0	0	0.237647	0	0	0	0	0	0	0	0	0	0	0	0	0	0.279683	0
lib230331_GTAGGTTCACCTTCGT-1	0.270748	0.062585	0	0	0	0.199513	0	0	0	0	0	0	0	0	0	0	0	0	0	0	0	0	0	0.217984	0	0.5	0	0	0	0	0	0	0	0	0	0.45614	0	0	0	0	0	0	0.333333	0	0.199513	0	0	0	0
lib230331_GTAGTACTCGAAGAAT-1	0	0	0	0	0	0	0	0	0	0	0	0	0	0	0	0	0	0	0	0	0	0.0873563	0	0	0	0	0	0	0	0	0	0	0	0	0	0	0	0	0	0	0	0	0	0	0	0	0	0	0
lib230331_GTCAGCGTCGCTTTAT-1	0	0	0	0	0	0	0	0	0	0	0	0	0	0	0	0	0	0	0	0	0	0.0873563	0	0	0	0	0	0	0	0	0	0	0	0	0	0	0	0	0	0	0	0	0	0	0	0	0	0	0
lib230331_GTCATCCGTCGCGTCA-1	0	0	0	0	0	0	0	0	0	0	0.279683	0	0	0	0	0	0	0	0	0	0	0	0	0.441417	0	0	0	0	0	0	0	0	0	0.237647	0	0	0	0	0	0	0	0	0	0	0	0	0	0.279683	0
lib230331_GTCCTCACAGGTCTCG-1	0	0	0	0.0747475	0	0	0	0.224806	0	0	0	0	0	0	0	0.381148	0	0.362007	0	0.25	0	0.211494	0	0	0	0	0	0.407115	0	0	0.134868	0	0	0	0	0.333333	0	0.328358	0	0	0	0	0	0.0747475	0	0.224806	0	0	0
lib230331_GTCGCGACAGGCGTTC-1	0	0	0	0.0888889	0.0510949	0	0	0	0	0	0	0	0	0	0	0	0	0.46595	0	0	0	0	0	0.332425	0	0	0	0	0	0	0	0	0	0.202353	0	0	0	0.308458	0	0	0	0	0	0.0888889	0.0510949	0	0	0	0
lib230331_GTCTACCCAACGCCCA-1	0	0	0	0	0	0	0	0	0	0	0	0	0	0	0	0	0	0	0	0	0	0.0873563	0	0	0	0	0	0	0	0	0	0	0	0	0	0	0	0	0	0	0	0	0	0	0	0	0	0	0
lib230331_GTCTACCTCCTAGAGT-1	0	0	0	0	0	0	0	0	0	0	0	0	0	0	0	0	0	0	0	0	0	0.0873563	0	0	0	0	0	0	0	0	0	0	0	0	0	0	0	0	0	0	0	0	0	0	0	0	0	0	0
lib230331_GTCTAGATCCCTCTCC-1	0	0	0	0	0	0	0	0	0	0	0	0	0	0	0	0	0	0	0	0	0	0.0873563	0	0	0	0	0	0	0	0	0	0	0	0	0	0	0	0	0	0	0	0	0	0	0	0	0	0	0
lib230331_GTGAGCCGTCATACCA-1	0	0	0	0.0747475	0	0	0	0.224806	0	0	0	0	0	0	0	0.381148	0	0.362007	0	0.25	0	0.211494	0	0	0	0	0	0.407115	0	0	0.134868	0	0	0	0	0.333333	0	0.328358	0	0	0	0	0	0.0747475	0	0.224806	0	0	0
lib230331_GTGCACGAGTTCGCAT-1	0	0	0	0.0888889	0.0510949	0	0	0	0	0	0	0	0	0	0	0	0	0.46595	0	0	0	0	0	0.332425	0	0	0	0	0	0	0	0	0	0.202353	0	0	0	0.308458	0	0	0	0	0	0.0888889	0.0510949	0	0	0	0
lib230331_GTGCTGGTCGTCACCT-1	0	0	0	0	0	0	0	0	0	0	0.279683	0	0	0	0	0	0	0	0	0	0	0	0	0.441417	0	0	0	0	0	0	0	0	0	0.237647	0	0	0	0	0	0	0	0	0	0	0	0	0	0.279683	0
lib230331_GTGGCGTGTCTAACGT-1	0	0	0	0	0	0	0	0	0	0	0.279683	0	0	0	0	0	0	0	0	0	0	0	0	0.441417	0	0	0	0	0	0	0	0	0	0.237647	0	0	0	0	0	0	0	0	0	0	0	0	0	0.279683	0
lib230331_GTGTGGCCAAGTGGTG-1	0	0	0	0	0	0	0	0	0	0	0.279683	0	0	0	0	0	0	0	0	0	0	0	0	0.441417	0	0	0	0	0	0	0	0	0	0.237647	0	0	0	0	0	0	0	0	0	0	0	0	0	0.279683	0
lib230331_GTGTTCCTCTGCTTTA-1	0	0	0	0.113131	0	0	0	0.174419	0	0	0	0.121372	0	0.15942	0	0	0	0.415771	0	0	0	0.0735632	0	0	0	0	0	0	0	0	0	0	0	0.155294	0	0	0	0	1	0	0	0	0	0.113131	0	0.174419	0	0.121372	0.15942
lib230331_GTTACCCAGACACACG-1	0	0.0952381	0	0.0929293	0	0.206813	0	0	0	0	0.25066	0	0	0	0	0	0	0	0	0.231061	0	0.110345	0	0.155313	0	0	0	0	0	0.24569	0	0	0	0.0823529	0	0	0	0	0	0	0	0	0.0952381	0.0929293	0.206813	0	0	0.25066	0
lib230331_GTTACCCAGGGCAATC-1	0	0.0952381	0	0.0929293	0	0.206813	0	0	0	0	0.25066	0	0	0	0	0	0	0	0	0.231061	0	0.110345	0	0.155313	0	0	0	0	0	0.24569	0	0	0	0.0823529	0	0	0	0	0	0	0	0	0.0952381	0.0929293	0.206813	0	0	0.25066	0
lib230331_GTTACCCGTCAAACGG-1	0	0	0	0	0	0	0	0	0	0	0	0	0	0	0	0	0	0	0	0	0	0.0873563	0	0	0	0	0	0	0	0	0	0	0	0	0	0	0	0	0	0	0	0	0	0	0	0	0	0	0
lib230331_GTTCCGTAGGGTGAAA-1	0	0.0952381	0	0.0929293	0	0.206813	0	0	0	0	0.25066	0	0	0	0	0	0	0	0	0.231061	0	0.110345	0	0.155313	0	0	0	0	0	0.24569	0	0	0	0.0823529	0	0	0	0	0	0	0	0	0.0952381	0.0929293	0.206813	0	0	0.25066	0
lib230331_GTTCCGTTCGTAGGGA-1	0	0	0	0.0888889	0.0510949	0	0	0	0	0	0	0	0	0	0	0	0	0.46595	0	0	0	0	0	0.332425	0	0	0	0	0	0	0	0	0	0.202353	0	0	0	0.308458	0	0	0	0	0	0.0888889	0.0510949	0	0	0	0
lib230331_GTTCGCTGTAACGCGA-1	0	0.0952381	0	0.0929293	0	0.206813	0	0	0	0	0.25066	0	0	0	0	0	0	0	0	0.231061	0	0.110345	0	0.155313	0	0	0	0	0	0.24569	0	0	0	0.0823529	0	0	0	0	0	0	0	0	0.0952381	0.0929293	0.206813	0	0	0.25066	0
lib230331_GTTCTATAGCGGTAGT-1	0.288435	0.360544	0.0787879	0.341414	0	0.690998	0	0.751938	0.308917	0.417197	0.263852	0.242744	0	0.318841	0	0.758197	0.139785	0.458781	0	0.80303	0.445977	0.248276	0.506812	0.280654	0	1	0	0.29249	0	0.534483	0.5	0	0.536471	0.164706	0	1	0.298507	0	0	1	0.265432	0	0.64898	0.420202	0.690998	0.751938	0.726115	0.506596	0.318841
lib230331_GTTGAACAGGGCTTCC-1	0.270748	0.062585	0	0	0	0.199513	0	0	0	0	0	0	0	0	0	0	0	0	0	0	0	0	0	0.217984	0	0.5	0	0	0	0	0	0	0	0	0	0.45614	0	0	0	0	0	0	0.333333	0	0.199513	0	0	0	0
lib230331_GTTGAACGTTAGGCTT-1	0	0	0	0.0888889	0.0510949	0	0	0	0	0	0	0	0	0	0	0	0	0.46595	0	0	0	0	0	0.332425	0	0	0	0	0	0	0	0	0	0.202353	0	0	0	0.308458	0	0	0	0	0	0.0888889	0.0510949	0	0	0	0
lib230331_GTTGCGGTCTGTCCGT-1	0	0	0	0.0888889	0.0510949	0	0	0	0	0	0	0	0	0	0	0	0	0.46595	0	0	0	0	0	0.332425	0	0	0	0	0	0	0	0	0	0.202353	0	0	0	0.308458	0	0	0	0	0	0.0888889	0.0510949	0	0	0	0
lib230331_GTTGTAGGTGGCATCC-1	0.270748	0.062585	0	0	0	0.199513	0	0	0	0	0	0	0	0	0	0	0	0	0	0	0	0	0	0.217984	0	0.5	0	0	0	0	0	0	0	0	0	0.45614	0	0	0	0	0	0	0.333333	0	0.199513	0	0	0	0
lib230331_GTTGTCCCAAACACGG-1	0.288435	0.360544	0.0787879	0.341414	0	0.690998	0	0.751938	0.308917	0.417197	0.263852	0.242744	0	0.318841	0	0.758197	0.139785	0.458781	0	0.80303	0.445977	0.248276	0.506812	0.280654	0	1	0	0.29249	0	0.534483	0.5	0	0.536471	0.164706	0	1	0.298507	0	0	1	0.265432	0	0.64898	0.420202	0.690998	0.751938	0.726115	0.506596	0.318841
lib230331_GTTGTCCGTCGTTGCG-1	0	0	0	0.0888889	0.0510949	0	0	0	0	0	0	0	0	0	0	0	0	0.46595	0	0	0	0	0	0.332425	0	0	0	0	0	0	0	0	0	0.202353	0	0	0	0.308458	0	0	0	0	0	0.0888889	0.0510949	0	0	0	0
lib230331_TAACGACTCAGTCATG-1	0	0	0	0.113131	0	0	0	0.174419	0	0	0	0.121372	0	0.15942	0	0	0	0.415771	0	0	0	0.0735632	0	0	0	0	0	0	0	0	0	0	0	0.155294	0	0	0	0	1	0	0	0	0	0.113131	0	0.174419	0	0.121372	0.15942
lib230331_TAACGACTCTCCACTG-1	0	0	0	0.113131	0	0	0	0.174419	0	0	0	0.121372	0	0.15942	0	0	0	0.415771	0	0	0	0.0735632	0	0	0	0	0	0	0	0	0	0	0	0.155294	0	0	0	0	1	0	0	0	0	0.113131	0	0.174419	0	0.121372	0.15942
lib230331_TAAGCCAAGAATTGTG-1	0	0	0	0.113131	0	0	0	0.174419	0	0	0	0.121372	0	0.15942	0	0	0	0.415771	0	0	0	0.0735632	0	0	0	0	0	0	0	0	0	0	0	0.155294	0	0	0	0	1	0	0	0	0	0.113131	0	0.174419	0	0.121372	0.15942
lib230331_TACCCACAGTGGATAT-1	0	0	0	0	0	0	0	0	0	0	0.279683	0	0	0	0	0	0	0	0	0	0	0	0	0.441417	0	0	0	0	0	0	0	0	0	0.237647	0	0	0	0	0	0	0	0	0	0	0	0	0	0.279683	0
lib230331_TACCGAATCATAGACC-1	0	0	0	0.113131	0	0	0	0.174419	0	0	0	0.121372	0	0.15942	0	0	0	0.415771	0	0	0	0.0735632	0	0	0	0	0	0	0	0	0	0	0	0.155294	0	0	0	0	1	0	0	0	0	0.113131	0	0.174419	0	0.121372	0.15942
lib230331_TACCGAATCTTGGAAC-1	0	0	0	0.0888889	0.0510949	0	0	0	0	0	0	0	0	0	0	0	0	0.46595	0	0	0	0	0	0.332425	0	0	0	0	0	0	0	0	0	0.202353	0	0	0	0.308458	0	0	0	0	0	0.0888889	0.0510949	0	0	0	0
lib230331_TACCGGGCATACTGTG-1	0.270748	0.062585	0	0	0	0.199513	0	0	0	0	0	0	0	0	0	0	0	0	0	0	0	0	0	0.217984	0	0.5	0	0	0	0	0	0	0	0	0	0.45614	0	0	0	0	0	0	0.333333	0	0.199513	0	0	0	0
lib230331_TACCTCGTCTTACTGT-1	0	0.0952381	0	0.0929293	0	0.206813	0	0	0	0	0.25066	0	0	0	0	0	0	0	0	0.231061	0	0.110345	0	0.155313	0	0	0	0	0	0.24569	0	0	0	0.0823529	0	0	0	0	0	0	0	0	0.0952381	0.0929293	0.206813	0	0	0.25066	0
lib230331_TACTGCCGTAGTAAGT-1	0	0	0	0.0888889	0.0510949	0	0	0	0	0	0	0	0	0	0	0	0	0.46595	0	0	0	0	0	0.332425	0	0	0	0	0	0	0	0	0	0.202353	0	0	0	0.308458	0	0	0	0	0	0.0888889	0.0510949	0	0	0	0
lib230331_TACTTACCACTGAATC-1	0	0	0	0	0	0	0	0	0	0	0	0	0	0	0	0	0	0	0	0	0	0.0873563	0	0	0	0	0	0	0	0	0	0	0	0	0	0	0	0	0	0	0	0	0	0	0	0	0	0	0
lib230331_TAGGGTTAGTAACGTA-1	0	0	0	0.0888889	0.0510949	0	0	0	0	0	0	0	0	0	0	0	0	0.46595	0	0	0	0	0	0.332425	0	0	0	0	0	0	0	0	0	0.202353	0	0	0	0.308458	0	0	0	0	0	0.0888889	0.0510949	0	0	0	0
lib230331_TAGTGCACATAGGTTC-1	0	0	0	0.113131	0	0	0	0.174419	0	0	0	0.121372	0	0.15942	0	0	0	0.415771	0	0	0	0.0735632	0	0	0	0	0	0	0	0	0	0	0	0.155294	0	0	0	0	1	0	0	0	0	0.113131	0	0.174419	0	0.121372	0.15942
lib230331_TATACCTTCAGTGTTG-1	0	0	0	0.0747475	0	0	0	0.224806	0	0	0	0	0	0	0	0.381148	0	0.362007	0	0.25	0	0.211494	0	0	0	0	0	0.407115	0	0	0.134868	0	0	0	0	0.333333	0	0.328358	0	0	0	0	0	0.0747475	0	0.224806	0	0	0
lib230331_TATCCTAGTGTAAACA-1	0	0	0	0.0888889	0.0510949	0	0	0	0	0	0	0	0	0	0	0	0	0.46595	0	0	0	0	0	0.332425	0	0	0	0	0	0	0	0	0	0.202353	0	0	0	0.308458	0	0	0	0	0	0.0888889	0.0510949	0	0	0	0
lib230331_TATTCCATCTTTACAC-1	0	0	0	0	0	0	0	0	0	0	0	0	0	0	0	0	0	0	0	0	0	0.0873563	0	0	0	0	0	0	0	0	0	0	0	0	0	0	0	0	0	0	0	0	0	0	0	0	0	0	0
lib230331_TCAAGCACAGTTGAAA-1	0	0	0	0.113131	0	0	0	0.174419	0	0	0	0.121372	0	0.15942	0	0	0	0.415771	0	0	0	0.0735632	0	0	0	0	0	0	0	0	0	0	0	0.155294	0	0	0	0	1	0	0	0	0	0.113131	0	0.174419	0	0.121372	0.15942
lib230331_TCAATTCTCTCATGCC-1	0	0	0	0	0	0	0	0	0	0	0	0	0	0	0	0	0	0	0	0	0	0.0873563	0	0	0	0	0	0	0	0	0	0	0	0	0	0	0	0	0	0	0	0	0	0	0	0	0	0	0
lib230331_TCACAAGCACATAGCT-1	0	0.0952381	0	0.0929293	0	0.206813	0	0	0	0	0.25066	0	0	0	0	0	0	0	0	0.231061	0	0.110345	0	0.155313	0	0	0	0	0	0.24569	0	0	0	0.0823529	0	0	0	0	0	0	0	0	0.0952381	0.0929293	0.206813	0	0	0.25066	0
lib230331_TCACACCTCGGCATAT-1	0	0	0	0	0	0	0	0	0	0	0	0	0	0	0	0	0	0	0	0	0	0.0873563	0	0	0	0	0	0	0	0	0	0	0	0	0	0	0	0	0	0	0	0	0	0	0	0	0	0	0
lib230331_TCACACCTCTCAGTCC-1	0	0	0	0	0	0	0	0	0	0	0	0	0	0	0	0	0	0	0	0	0	0.0873563	0	0	0	0	0	0	0	0	0	0	0	0	0	0	0	0	0	0	0	0	0	0	0	0	0	0	0
lib230331_TCACATTTCACCCTGT-1	0	0	0	0	0	0	0	0	0	0	0.279683	0	0	0	0	0	0	0	0	0	0	0	0	0.441417	0	0	0	0	0	0	0	0	0	0.237647	0	0	0	0	0	0	0	0	0	0	0	0	0	0.279683	0
lib230331_TCACGCTCATCGCTGG-1	0	0	0	0	0	0	0	0	0	0	0	0	0	0	0	0	0	0	0	0	0	0.0873563	0	0	0	0	0	0	0	0	0	0	0	0	0	0	0	0	0	0	0	0	0	0	0	0	0	0	0
lib230331_TCAGTCCCAGTCAGCC-1	0	0	0	0.113131	0	0	0	0.174419	0	0	0	0.121372	0	0.15942	0	0	0	0.415771	0	0	0	0.0735632	0	0	0	0	0	0	0	0	0	0	0	0.155294	0	0	0	0	1	0	0	0	0	0.113131	0	0.174419	0	0.121372	0.15942
lib230331_TCAGTGACACATAACC-1	0	0	0	0	0	0	0	0	0	0	0	0	0	0	0	0	0	0	0	0	0	0.0873563	0	0	0	0	0	0	0	0	0	0	0	0	0	0	0	0	0	0	0	0	0	0	0	0	0	0	0
lib230331_TCAGTGATCTGGACCG-1	0	0	0	0	0	0	0	0	0	0	0.279683	0	0	0	0	0	0	0	0	0	0	0	0	0.441417	0	0	0	0	0	0	0	0	0	0.237647	0	0	0	0	0	0	0	0	0	0	0	0	0	0.279683	0
lib230331_TCAGTTTTCACTTCTA-1	0	0	0	0.0888889	0.0510949	0	0	0	0	0	0	0	0	0	0	0	0	0.46595	0	0	0	0	0	0.332425	0	0	0	0	0	0	0	0	0	0.202353	0	0	0	0.308458	0	0	0	0	0	0.0888889	0.0510949	0	0	0	0
lib230331_TCATCATGTGCCTTTC-1	0	0	0	0.0888889	0.0510949	0	0	0	0	0	0	0	0	0	0	0	0	0.46595	0	0	0	0	0	0.332425	0	0	0	0	0	0	0	0	0	0.202353	0	0	0	0.308458	0	0	0	0	0	0.0888889	0.0510949	0	0	0	0
lib230331_TCATCCGGTTCAAAGA-1	0	0	0	0	0	0	0	0	0	0	0	0	0	0	0	0	0	0	0	0	0	0.0873563	0	0	0	0	0	0	0	0	0	0	0	0	0	0	0	0	0	0	0	0	0	0	0	0	0	0	0
lib230331_TCATGCCGTATCACCA-1	0	0	0	0.113131	0	0	0	0.174419	0	0	0	0.121372	0	0.15942	0	0	0	0.415771	0	0	0	0.0735632	0	0	0	0	0	0	0	0	0	0	0	0.155294	0	0	0	0	1	0	0	0	0	0.113131	0	0.174419	0	0.121372	0.15942
lib230331_TCATGCCGTTTCTATC-1	0	0	0	0.0888889	0.0510949	0	0	0	0	0	0	0	0	0	0	0	0	0.46595	0	0	0	0	0	0.332425	0	0	0	0	0	0	0	0	0	0.202353	0	0	0	0.308458	0	0	0	0	0	0.0888889	0.0510949	0	0	0	0
lib230331_TCATTCAAGGTCGCCT-1	0	0	0	0	0	0	0	0	0	0	0	0	0	0	0	0	0	0	0	0	0	0.0873563	0	0	0	0	0	0	0	0	0	0	0	0	0	0	0	0	0	0	0	0	0	0	0	0	0	0	0
lib230331_TCATTGTAGCAGCCCT-1	0	0	0	0.113131	0	0	0	0.174419	0	0	0	0.121372	0	0.15942	0	0	0	0.415771	0	0	0	0.0735632	0	0	0	0	0	0	0	0	0	0	0	0.155294	0	0	0	0	1	0	0	0	0	0.113131	0	0.174419	0	0.121372	0.15942
lib230331_TCATTGTTCCTCTAAT-1	0	0	0	0.113131	0	0	0	0.174419	0	0	0	0.121372	0	0.15942	0	0	0	0.415771	0	0	0	0.0735632	0	0	0	0	0	0	0	0	0	0	0	0.155294	0	0	0	0	1	0	0	0	0	0.113131	0	0.174419	0	0.121372	0.15942
lib230331_TCCAGAACATAGGTAA-1	0	0.0952381	0	0.0929293	0	0.206813	0	0	0	0	0.25066	0	0	0	0	0	0	0	0	0.231061	0	0.110345	0	0.155313	0	0	0	0	0	0.24569	0	0	0	0.0823529	0	0	0	0	0	0	0	0	0.0952381	0.0929293	0.206813	0	0	0.25066	0
lib230331_TCCATCGCATGTGGTT-1	0	0	0	0	0	0	0	0	0	0	0.279683	0	0	0	0	0	0	0	0	0	0	0	0	0.441417	0	0	0	0	0	0	0	0	0	0.237647	0	0	0	0	0	0	0	0	0	0	0	0	0	0.279683	0
lib230331_TCCCACAAGCGACTAG-1	0	0	0	0	0	0	0	0	0	0	0	0	0	0	0	0	0	0	0	0	0	0.0873563	0	0	0	0	0	0	0	0	0	0	0	0	0	0	0	0	0	0	0	0	0	0	0	0	0	0	0
lib230331_TCCGATCGTTGTAAAG-1	0	0	0	0	0	0	0	0	0	0	0.279683	0	0	0	0	0	0	0	0	0	0	0	0	0.441417	0	0	0	0	0	0	0	0	0	0.237647	0	0	0	0	0	0	0	0	0	0	0	0	0	0.279683	0
lib230331_TCCGATCGTTGTCAGT-1	0.270748	0.062585	0	0	0	0.199513	0	0	0	0	0	0	0	0	0	0	0	0	0	0	0	0	0	0.217984	0	0.5	0	0	0	0	0	0	0	0	0	0.45614	0	0	0	0	0	0	0.333333	0	0.199513	0	0	0	0
lib230331_TCCTCGACAGACGCTC-1	0	0	0	0.0888889	0.0510949	0	0	0	0	0	0	0	0	0	0	0	0	0.46595	0	0	0	0	0	0.332425	0	0	0	0	0	0	0	0	0	0.202353	0	0	0	0.308458	0	0	0	0	0	0.0888889	0.0510949	0	0	0	0
lib230331_TCCTCTTCATACAGGG-1	0	0	0	0	0	0	0	0	0	0	0.279683	0	0	0	0	0	0	0	0	0	0	0	0	0.441417	0	0	0	0	0	0	0	0	0	0.237647	0	0	0	0	0	0	0	0	0	0	0	0	0	0.279683	0
lib230331_TCCTCTTGTAGTTCCA-1	0	0.0952381	0	0.0929293	0	0.206813	0	0	0	0	0.25066	0	0	0	0	0	0	0	0	0.231061	0	0.110345	0	0.155313	0	0	0	0	0	0.24569	0	0	0	0.0823529	0	0	0	0	0	0	0	0	0.0952381	0.0929293	0.206813	0	0	0.25066	0
lib230331_TCCTTCTTCACGTCCT-1	0	0.0952381	0	0.0929293	0	0.206813	0	0	0	0	0.25066	0	0	0	0	0	0	0	0	0.231061	0	0.110345	0	0.155313	0	0	0	0	0	0.24569	0	0	0	0.0823529	0	0	0	0	0	0	0	0	0.0952381	0.0929293	0.206813	0	0	0.25066	0
lib230331_TCGAACATCCCATTTA-1	0	0	0	0	0	0	0	0	0	0	0	0	0	0	0	0	0	0	0	0	0	0.0873563	0	0	0	0	0	0	0	0	0	0	0	0	0	0	0	0	0	0	0	0	0	0	0	0	0	0	0
lib230331_TCGCACTCATACACCA-1	0	0.0952381	0	0.0929293	0	0.206813	0	0	0	0	0.25066	0	0	0	0	0	0	0	0	0.231061	0	0.110345	0	0.155313	0	0	0	0	0	0.24569	0	0	0	0.0823529	0	0	0	0	0	0	0	0	0.0952381	0.0929293	0.206813	0	0	0.25066	0
lib230331_TCGGATATCACCTCTG-1	0	0	0	0	0	0	0	0	0	0	0	0	0	0	0	0	0	0	0	0	0	0.0873563	0	0	0	0	0	0	0	0	0	0	0	0	0	0	0	0	0	0	0	0	0	0	0	0	0	0	0
lib230331_TCTACCGCAATTTCGG-1	0	0	0	0	0	0	0	0	0	0	0.279683	0	0	0	0	0	0	0	0	0	0	0	0	0.441417	0	0	0	0	0	0	0	0	0	0.237647	0	0	0	0	0	0	0	0	0	0	0	0	0	0.279683	0
lib230331_TCTACCGCAGCTGTGC-1	0	0	0	0.0888889	0.0510949	0	0	0	0	0	0	0	0	0	0	0	0	0.46595	0	0	0	0	0	0.332425	0	0	0	0	0	0	0	0	0	0.202353	0	0	0	0.308458	0	0	0	0	0	0.0888889	0.0510949	0	0	0	0
lib230331_TCTATCAAGAACAAGG-1	0	0.0952381	0	0.0929293	0	0.206813	0	0	0	0	0.25066	0	0	0	0	0	0	0	0	0.231061	0	0.110345	0	0.155313	0	0	0	0	0	0.24569	0	0	0	0.0823529	0	0	0	0	0	0	0	0	0.0952381	0.0929293	0.206813	0	0	0.25066	0
lib230331_TCTCAGCCAATGGCCC-1	0	0	0	0	0	0	0	0	0	0	0	0	0	0	0	0	0	0	0	0	0	0.0873563	0	0	0	0	0	0	0	0	0	0	0	0	0	0	0	0	0	0	0	0	0	0	0	0	0	0	0
lib230331_TCTCTGGAGAGTAACT-1	0	0	0	0	0	0	0	0	0	0	0.279683	0	0	0	0	0	0	0	0	0	0	0	0	0.441417	0	0	0	0	0	0	0	0	0	0.237647	0	0	0	0	0	0	0	0	0	0	0	0	0	0.279683	0
lib230331_TCTGCCAAGCGGGTAT-1	0	0	0	0	0	0	0	0	0	0	0	0	0	0	0	0	0	0	0	0	0	0.0873563	0	0	0	0	0	0	0	0	0	0	0	0	0	0	0	0	0	0	0	0	0	0	0	0	0	0	0
lib230331_TCTGGCTAGCCACCGT-1	0	0.0952381	0	0.0929293	0	0.206813	0	0	0	0	0.25066	0	0	0	0	0	0	0	0	0.231061	0	0.110345	0	0.155313	0	0	0	0	0	0.24569	0	0	0	0.0823529	0	0	0	0	0	0	0	0	0.0952381	0.0929293	0.206813	0	0	0.25066	0
lib230331_TCTGTCGAGGACAACC-1	0	0	0	0.0747475	0	0	0	0.224806	0	0	0	0	0	0	0	0.381148	0	0.362007	0	0.25	0	0.211494	0	0	0	0	0	0.407115	0	0	0.134868	0	0	0	0	0.333333	0	0.328358	0	0	0	0	0	0.0747475	0	0.224806	0	0	0
lib230331_TCTGTCGAGGCCTTCG-1	0	0	0	0.113131	0	0	0	0.174419	0	0	0	0.121372	0	0.15942	0	0	0	0.415771	0	0	0	0.0735632	0	0	0	0	0	0	0	0	0	0	0	0.155294	0	0	0	0	1	0	0	0	0	0.113131	0	0.174419	0	0.121372	0.15942
lib230331_TCTTGCGGTCTACGTA-1	0	0.0952381	0	0.0929293	0	0.206813	0	0	0	0	0.25066	0	0	0	0	0	0	0	0	0.231061	0	0.110345	0	0.155313	0	0	0	0	0	0.24569	0	0	0	0.0823529	0	0	0	0	0	0	0	0	0.0952381	0.0929293	0.206813	0	0	0.25066	0
lib230331_TCTTTGACAGCTTTCC-1	0	0	0	0.0888889	0.0510949	0	0	0	0	0	0	0	0	0	0	0	0	0.46595	0	0	0	0	0	0.332425	0	0	0	0	0	0	0	0	0	0.202353	0	0	0	0.308458	0	0	0	0	0	0.0888889	0.0510949	0	0	0	0
lib230331_TCTTTGAGTCATCAGT-1	0	0	0	0	0	0	0	0	0	0	0	0	0	0	0	0	0	0	0	0	0	0.0873563	0	0	0	0	0	0	0	0	0	0	0	0	0	0	0	0	0	0	0	0	0	0	0	0	0	0	0
lib230331_TCTTTGATCGAGAATA-1	0.270748	0.062585	0	0	0	0.199513	0	0	0	0	0	0	0	0	0	0	0	0	0	0	0	0	0	0.217984	0	0.5	0	0	0	0	0	0	0	0	0	0.45614	0	0	0	0	0	0	0.333333	0	0.199513	0	0	0	0
lib230331_TGAACGTAGAGCCGAT-1	0	0	0	0	0	0	0	0	0	0	0.279683	0	0	0	0	0	0	0	0	0	0	0	0	0.441417	0	0	0	0	0	0	0	0	0	0.237647	0	0	0	0	0	0	0	0	0	0	0	0	0	0.279683	0
lib230331_TGAATCGCAGTAGATA-1	0.270748	0.062585	0	0	0	0.199513	0	0	0	0	0	0	0	0	0	0	0	0	0	0	0	0	0	0.217984	0	0.5	0	0	0	0	0	0	0	0	0	0.45614	0	0	0	0	0	0	0.333333	0	0.199513	0	0	0	0
lib230331_TGAATGCGTTCGCGTG-1	0	0	0	0	0	0	0	0	0	0	0.279683	0	0	0	0	0	0	0	0	0	0	0	0	0.441417	0	0	0	0	0	0	0	0	0	0.237647	0	0	0	0	0	0	0	0	0	0	0	0	0	0.279683	0
lib230331_TGATGCAGTAACAGGC-1	0	0	0	0.113131	0	0	0	0.174419	0	0	0	0.121372	0	0.15942	0	0	0	0.415771	0	0	0	0.0735632	0	0	0	0	0	0	0	0	0	0	0	0.155294	0	0	0	0	1	0	0	0	0	0.113131	0	0.174419	0	0.121372	0.15942
lib230331_TGATGGTCACCACATA-1	0	0	0	0.113131	0	0	0	0.174419	0	0	0	0.121372	0	0.15942	0	0	0	0.415771	0	0	0	0.0735632	0	0	0	0	0	0	0	0	0	0	0	0.155294	0	0	0	0	1	0	0	0	0	0.113131	0	0.174419	0	0.121372	0.15942
lib230331_TGATGGTTCGCATAGT-1	0	0	0	0	0	0	0	0	0	0	0	0	0	0	0	0	0	0	0	0	0	0.0873563	0	0	0	0	0	0	0	0	0	0	0	0	0	0	0	0	0	0	0	0	0	0	0	0	0	0	0
lib230331_TGATGGTTCTTGGAAC-1	0	0	0	0.0888889	0.0510949	0	0	0	0	0	0	0	0	0	0	0	0	0.46595	0	0	0	0	0	0.332425	0	0	0	0	0	0	0	0	0	0.202353	0	0	0	0.308458	0	0	0	0	0	0.0888889	0.0510949	0	0	0	0
lib230331_TGATTTCGTTGTGCAT-1	0.270748	0.062585	0	0	0	0.199513	0	0	0	0	0	0	0	0	0	0	0	0	0	0	0	0	0	0.217984	0	0.5	0	0	0	0	0	0	0	0	0	0.45614	0	0	0	0	0	0	0.333333	0	0.199513	0	0	0	0
lib230331_TGATTTCGTTTATGCG-1	0	0	0	0	0	0	0	0	0	0	0.279683	0	0	0	0	0	0	0	0	0	0	0	0	0.441417	0	0	0	0	0	0	0	0	0	0.237647	0	0	0	0	0	0	0	0	0	0	0	0	0	0.279683	0
lib230331_TGCACGGAGGGAGGGT-1	0	0	0	0.0747475	0	0	0	0.224806	0	0	0	0	0	0	0	0.381148	0	0.362007	0	0.25	0	0.211494	0	0	0	0	0	0.407115	0	0	0.134868	0	0	0	0	0.333333	0	0.328358	0	0	0	0	0	0.0747475	0	0.224806	0	0	0
lib230331_TGCACGGCACGCAAAG-1	0	0	0	0	0	0	0	0	0	0	0	0	0	0	0	0	0	0	0	0	0	0.0873563	0	0	0	0	0	0	0	0	0	0	0	0	0	0	0	0	0	0	0	0	0	0	0	0	0	0	0
lib230331_TGCAGTACATCCTATT-1	0	0	0	0	0	0	0	0	0	0	0	0	0	0	0	0	0	0	0	0	0	0.0873563	0	0	0	0	0	0	0	0	0	0	0	0	0	0	0	0	0	0	0	0	0	0	0	0	0	0	0
lib230331_TGCATCCCAAGATCCT-1	0	0	0	0.113131	0	0	0	0.174419	0	0	0	0.121372	0	0.15942	0	0	0	0.415771	0	0	0	0.0735632	0	0	0	0	0	0	0	0	0	0	0	0.155294	0	0	0	0	1	0	0	0	0	0.113131	0	0.174419	0	0.121372	0.15942
lib230331_TGCATCCGTTCTTGCC-1	0	0	0	0.113131	0	0	0	0.174419	0	0	0	0.121372	0	0.15942	0	0	0	0.415771	0	0	0	0.0735632	0	0	0	0	0	0	0	0	0	0	0	0.155294	0	0	0	0	1	0	0	0	0	0.113131	0	0.174419	0	0.121372	0.15942
lib230331_TGCATGACAGATCACT-1	0	0	0	0.113131	0	0	0	0.174419	0	0	0	0.121372	0	0.15942	0	0	0	0.415771	0	0	0	0.0735632	0	0	0	0	0	0	0	0	0	0	0	0.155294	0	0	0	0	1	0	0	0	0	0.113131	0	0.174419	0	0.121372	0.15942
lib230331_TGCGACGTCCAGTACA-1	0	0	0	0.0888889	0.0510949	0	0	0	0	0	0	0	0	0	0	0	0	0.46595	0	0	0	0	0	0.332425	0	0	0	0	0	0	0	0	0	0.202353	0	0	0	0.308458	0	0	0	0	0	0.0888889	0.0510949	0	0	0	0
lib230331_TGCGGCACAAAGCAAT-1	0	0	0	0	0	0	0	0	0	0	0.279683	0	0	0	0	0	0	0	0	0	0	0	0	0.441417	0	0	0	0	0	0	0	0	0	0.237647	0	0	0	0	0	0	0	0	0	0	0	0	0	0.279683	0
lib230331_TGCTCGTCATCCGAAT-1	0.270748	0.062585	0	0	0	0.199513	0	0	0	0	0	0	0	0	0	0	0	0	0	0	0	0	0	0.217984	0	0.5	0	0	0	0	0	0	0	0	0	0.45614	0	0	0	0	0	0	0.333333	0	0.199513	0	0	0	0
lib230331_TGGAGAGCAATGAACA-1	0	0	0	0.113131	0	0	0	0.174419	0	0	0	0.121372	0	0.15942	0	0	0	0.415771	0	0	0	0.0735632	0	0	0	0	0	0	0	0	0	0	0	0.155294	0	0	0	0	1	0	0	0	0	0.113131	0	0.174419	0	0.121372	0.15942
lib230331_TGGAGAGCAGCACACC-1	0	0	0	0.113131	0	0	0	0.174419	0	0	0	0.121372	0	0.15942	0	0	0	0.415771	0	0	0	0.0735632	0	0	0	0	0	0	0	0	0	0	0	0.155294	0	0	0	0	1	0	0	0	0	0.113131	0	0.174419	0	0.121372	0.15942
lib230331_TGGAGGAAGCATACTC-1	0	0	0	0.0747475	0	0	0	0.224806	0	0	0	0	0	0	0	0.381148	0	0.362007	0	0.25	0	0.211494	0	0	0	0	0	0.407115	0	0	0.134868	0	0	0	0	0.333333	0	0.328358	0	0	0	0	0	0.0747475	0	0.224806	0	0	0
lib230331_TGGAGGAGTACTCCCT-1	0	0	0	0.0888889	0.0510949	0	0	0	0	0	0	0	0	0	0	0	0	0.46595	0	0	0	0	0	0.332425	0	0	0	0	0	0	0	0	0	0.202353	0	0	0	0.308458	0	0	0	0	0	0.0888889	0.0510949	0	0	0	0
lib230331_TGGATCACAGAGAATT-1	0	0	0	0	0	0	0	0	0	0	0.279683	0	0	0	0	0	0	0	0	0	0	0	0	0.441417	0	0	0	0	0	0	0	0	0	0.237647	0	0	0	0	0	0	0	0	0	0	0	0	0	0.279683	0
lib230331_TGGATCAGTCGACTTA-1	0	0	0	0.113131	0	0	0	0.174419	0	0	0	0.121372	0	0.15942	0	0	0	0.415771	0	0	0	0.0735632	0	0	0	0	0	0	0	0	0	0	0	0.155294	0	0	0	0	1	0	0	0	0	0.113131	0	0.174419	0	0.121372	0.15942
lib230331_TGGATGTTCCGACATA-1	0	0	0	0.113131	0	0	0	0.174419	0	0	0	0.121372	0	0.15942	0	0	0	0.415771	0	0	0	0.0735632	0	0	0	0	0	0	0	0	0	0	0	0.155294	0	0	0	0	1	0	0	0	0	0.113131	0	0.174419	0	0.121372	0.15942
lib230331_TGGGCTGTCTAGTGAC-1	0	0	0	0	0	0	0	0	0	0	0.279683	0	0	0	0	0	0	0	0	0	0	0	0	0.441417	0	0	0	0	0	0	0	0	0	0.237647	0	0	0	0	0	0	0	0	0	0	0	0	0	0.279683	0
lib230331_TGGTACACAGGTCCCA-1	0	0	0	0.0888889	0.0510949	0	0	0	0	0	0	0	0	0	0	0	0	0.46595	0	0	0	0	0	0.332425	0	0	0	0	0	0	0	0	0	0.202353	0	0	0	0.308458	0	0	0	0	0	0.0888889	0.0510949	0	0	0	0
lib230331_TGGTACAGTGGCTGAA-1	0	0	0	0	0	0	0	0	0	0	0	0	0	0	0	0	0	0	0	0	0	0.0873563	0	0	0	0	0	0	0	0	0	0	0	0	0	0	0	0	0	0	0	0	0	0	0	0	0	0	0
lib230331_TGGTGATAGACATCAA-1	0	0	0	0	0	0	0	0	0	0	0	0	0	0	0	0	0	0	0	0	0	0.0873563	0	0	0	0	0	0	0	0	0	0	0	0	0	0	0	0	0	0	0	0	0	0	0	0	0	0	0
lib230331_TGTAACGTCTTAATCC-1	0	0	0	0	0	0	0	0	0	0	0	0	0	0	0	0	0	0	0	0	0	0.0873563	0	0	0	0	0	0	0	0	0	0	0	0	0	0	0	0	0	0	0	0	0	0	0	0	0	0	0
lib230331_TGTCCCAGTCCAGCGT-1	0.270748	0.062585	0	0	0	0.199513	0	0	0	0	0	0	0	0	0	0	0	0	0	0	0	0	0	0.217984	0	0.5	0	0	0	0	0	0	0	0	0	0.45614	0	0	0	0	0	0	0.333333	0	0.199513	0	0	0	0
lib230331_TGTGAGTAGTACTCGT-1	0	0	0	0	0	0	0	0	0	0	0	0	0	0	0	0	0	0	0	0	0	0.0873563	0	0	0	0	0	0	0	0	0	0	0	0	0	0	0	0	0	0	0	0	0	0	0	0	0	0	0
lib230331_TGTGATGCAATTGCGT-1	0	0	0	0.0747475	0	0	0	0.224806	0	0	0	0	0	0	0	0.381148	0	0.362007	0	0.25	0	0.211494	0	0	0	0	0	0.407115	0	0	0.134868	0	0	0	0	0.333333	0	0.328358	0	0	0	0	0	0.0747475	0	0.224806	0	0	0
lib230331_TGTGGCGCAAATGGTA-1	0	0.0952381	0	0.0929293	0	0.206813	0	0	0	0	0.25066	0	0	0	0	0	0	0	0	0.231061	0	0.110345	0	0.155313	0	0	0	0	0	0.24569	0	0	0	0.0823529	0	0	0	0	0	0	0	0	0.0952381	0.0929293	0.206813	0	0	0.25066	0
lib230331_TGTTGGAAGTGGTTCT-1	0	0	0	0	0	0	0	0	0	0	0	0	0	0	0	0	0	0	0	0	0	0.0873563	0	0	0	0	0	0	0	0	0	0	0	0	0	0	0	0	0	0	0	0	0	0	0	0	0	0	0
lib230331_TGTTGGACAGGAAGTC-1	0	0	0	0.113131	0	0	0	0.174419	0	0	0	0.121372	0	0.15942	0	0	0	0.415771	0	0	0	0.0735632	0	0	0	0	0	0	0	0	0	0	0	0.155294	0	0	0	0	1	0	0	0	0	0.113131	0	0.174419	0	0.121372	0.15942
lib230331_TTACAGGCAAACTGCT-1	0	0	0	0.0747475	0	0	0	0.224806	0	0	0	0	0	0	0	0.381148	0	0.362007	0	0.25	0	0.211494	0	0	0	0	0	0.407115	0	0	0.134868	0	0	0	0	0.333333	0	0.328358	0	0	0	0	0	0.0747475	0	0.224806	0	0	0
lib230331_TTACGTTCAGCGTGCT-1	0	0.0952381	0	0.0929293	0	0.206813	0	0	0	0	0.25066	0	0	0	0	0	0	0	0	0.231061	0	0.110345	0	0.155313	0	0	0	0	0	0.24569	0	0	0	0.0823529	0	0	0	0	0	0	0	0	0.0952381	0.0929293	0.206813	0	0	0.25066	0
lib230331_TTCACGCGTGGCTACC-1	0.270748	0.062585	0	0	0	0.199513	0	0	0	0	0	0	0	0	0	0	0	0	0	0	0	0	0	0.217984	0	0.5	0	0	0	0	0	0	0	0	0	0.45614	0	0	0	0	0	0	0.333333	0	0.199513	0	0	0	0
lib230331_TTCATTGAGACTCATC-1	0	0	0	0.0747475	0	0	0	0.224806	0	0	0	0	0	0	0	0.381148	0	0.362007	0	0.25	0	0.211494	0	0	0	0	0	0.407115	0	0	0.134868	0	0	0	0	0.333333	0	0.328358	0	0	0	0	0	0.0747475	0	0.224806	0	0	0
lib230331_TTCATTGGTTTCACAG-1	0.270748	0.062585	0	0	0	0.199513	0	0	0	0	0	0	0	0	0	0	0	0	0	0	0	0	0	0.217984	0	0.5	0	0	0	0	0	0	0	0	0	0.45614	0	0	0	0	0	0	0.333333	0	0.199513	0	0	0	0
lib230331_TTCCAATGTATGGAAT-1	0	0	0	0	0	0	0	0	0	0	0.279683	0	0	0	0	0	0	0	0	0	0	0	0	0.441417	0	0	0	0	0	0	0	0	0	0.237647	0	0	0	0	0	0	0	0	0	0	0	0	0	0.279683	0
lib230331_TTCCAATTCCCGGTAG-1	0	0	0	0.0888889	0.0510949	0	0	0	0	0	0	0	0	0	0	0	0	0.46595	0	0	0	0	0	0.332425	0	0	0	0	0	0	0	0	0	0.202353	0	0	0	0.308458	0	0	0	0	0	0.0888889	0.0510949	0	0	0	0
lib230331_TTCCAATTCCGAAGGA-1	0	0	0	0	0	0	0	0	0	0	0	0	0	0	0	0	0	0	0	0	0	0.0873563	0	0	0	0	0	0	0	0	0	0	0	0	0	0	0	0	0	0	0	0	0	0	0	0	0	0	0
lib230331_TTCTAGTAGAGATTCA-1	0	0.0952381	0	0.0929293	0	0.206813	0	0	0	0	0.25066	0	0	0	0	0	0	0	0	0.231061	0	0.110345	0	0.155313	0	0	0	0	0	0.24569	0	0	0	0.0823529	0	0	0	0	0	0	0	0	0.0952381	0.0929293	0.206813	0	0	0.25066	0
lib230331_TTCTAGTCACCCTTAC-1	0	0	0	0.0888889	0.0510949	0	0	0	0	0	0	0	0	0	0	0	0	0.46595	0	0	0	0	0	0.332425	0	0	0	0	0	0	0	0	0	0.202353	0	0	0	0.308458	0	0	0	0	0	0.0888889	0.0510949	0	0	0	0
lib230331_TTCTCTCTCCGCATAA-1	0	0.0952381	0	0.0929293	0	0.206813	0	0	0	0	0.25066	0	0	0	0	0	0	0	0	0.231061	0	0.110345	0	0.155313	0	0	0	0	0	0.24569	0	0	0	0.0823529	0	0	0	0	0	0	0	0	0.0952381	0.0929293	0.206813	0	0	0.25066	0
lib230331_TTGATGGAGAGCATCG-1	0.270748	0.062585	0	0	0	0.199513	0	0	0	0	0	0	0	0	0	0	0	0	0	0	0	0	0	0.217984	0	0.5	0	0	0	0	0	0	0	0	0	0.45614	0	0	0	0	0	0	0.333333	0	0.199513	0	0	0	0
lib230331_TTGCATTGTAAGCAAT-1	0.270748	0.062585	0	0	0	0.199513	0	0	0	0	0	0	0	0	0	0	0	0	0	0	0	0	0	0.217984	0	0.5	0	0	0	0	0	0	0	0	0	0.45614	0	0	0	0	0	0	0.333333	0	0.199513	0	0	0	0
lib230331_TTGTTGTAGAATCGCG-1	0	0	0	0	0	0	0	0	0	0	0.279683	0	0	0	0	0	0	0	0	0	0	0	0	0.441417	0	0	0	0	0	0	0	0	0	0.237647	0	0	0	0	0	0	0	0	0	0	0	0	0	0.279683	0
lib230331_TTGTTGTCACCTGCAG-1	0.270748	0.062585	0	0	0	0.199513	0	0	0	0	0	0	0	0	0	0	0	0	0	0	0	0	0	0.217984	0	0.5	0	0	0	0	0	0	0	0	0	0.45614	0	0	0	0	0	0	0.333333	0	0.199513	0	0	0	0
lib230331_TTGTTGTGTTGTCTAG-1	0	0	0	0.113131	0	0	0	0.174419	0	0	0	0.121372	0	0.15942	0	0	0	0.415771	0	0	0	0.0735632	0	0	0	0	0	0	0	0	0	0	0	0.155294	0	0	0	0	1	0	0	0	0	0.113131	0	0.174419	0	0.121372	0.15942
lib230331_TTTACCAGTTCTCGCT-1	0	0.0952381	0	0.0929293	0	0.206813	0	0	0	0	0.25066	0	0	0	0	0	0	0	0	0.231061	0	0.110345	0	0.155313	0	0	0	0	0	0.24569	0	0	0	0.0823529	0	0	0	0	0	0	0	0	0.0952381	0.0929293	0.206813	0	0	0.25066	0
lib230331_TTTACTGAGCCGTCGT-1	0	0.0952381	0	0.0929293	0	0.206813	0	0	0	0	0.25066	0	0	0	0	0	0	0	0	0.231061	0	0.110345	0	0.155313	0	0	0	0	0	0.24569	0	0	0	0.0823529	0	0	0	0	0	0	0	0	0.0952381	0.0929293	0.206813	0	0	0.25066	0
lib230331_TTTACTGTCATACGGT-1	0	0	0	0	0	0	0	0	0	0	0	0	0	0	0	0	0	0	0	0	0	0.0873563	0	0	0	0	0	0	0	0	0	0	0	0	0	0	0	0	0	0	0	0	0	0	0	0	0	0	0
lib230331_TTTATGCAGGCCACCT-1	0	0	0	0	0	0	0	0	0	0	0.279683	0	0	0	0	0	0	0	0	0	0	0	0	0.441417	0	0	0	0	0	0	0	0	0	0.237647	0	0	0	0	0	0	0	0	0	0	0	0	0	0.279683	0
lib230331_TTTATGCCAACATACC-1	0.270748	0.062585	0	0	0	0.199513	0	0	0	0	0	0	0	0	0	0	0	0	0	0	0	0	0	0.217984	0	0.5	0	0	0	0	0	0	0	0	0	0.45614	0	0	0	0	0	0	0.333333	0	0.199513	0	0	0	0
lib230331_TTTATGCTCCTACGGG-1	0	0.0952381	0	0.0929293	0	0.206813	0	0	0	0	0.25066	0	0	0	0	0	0	0	0	0.231061	0	0.110345	0	0.155313	0	0	0	0	0	0.24569	0	0	0	0.0823529	0	0	0	0	0	0	0	0	0.0952381	0.0929293	0.206813	0	0	0.25066	0
lib230331_TTTCAGTCAGAGTGTG-1	0	0	0	0	0	0	0	0	0	0	0	0	0	0	0	0	0	0	0	0	0	0.0873563	0	0	0	0	0	0	0	0	0	0	0	0	0	0	0	0	0	0	0	0	0	0	0	0	0	0	0
lib230331_TTTCATGTCCGCACTT-1	0	0	0	0	0	0	0	0	0	0	0.279683	0	0	0	0	0	0	0	0	0	0	0	0	0.441417	0	0	0	0	0	0	0	0	0	0.237647	0	0	0	0	0	0	0	0	0	0	0	0	0	0.279683	0
lib230331_TTTCGATAGTCATAGA-1	0	0	0	0.113131	0	0	0	0.174419	0	0	0	0.121372	0	0.15942	0	0	0	0.415771	0	0	0	0.0735632	0	0	0	0	0	0	0	0	0	0	0	0.155294	0	0	0	0	1	0	0	0	0	0.113131	0	0.174419	0	0.121372	0.15942
lib230331_TTTGTTGAGCTGCCAC-1	0.270748	0.062585	0	0	0	0.199513	0	0	0	0	0	0	0	0	0	0	0	0	0	0	0	0	0	0.217984	0	0.5	0	0	0	0	0	0	0	0	0	0.45614	0	0	0	0	0	0	0.333333	0	0.199513	0	0	0	0
lib230331_AAACGCTGTCACAATC-1	0	0.062585	0	0	0	0	0	0	0	0	0	0	0.449275	0	0	0	0	0.111111	0	0	0	0.181609	0	0.433243	0	0	0	0	0	0	0	0	0	0	0	0.438596	0	0	0	0	1	0	0.062585	0	0	0	0	0	0.449275
lib230331_AACCATGTCTTAGTTC-1	0	0.062585	0	0	0	0	0	0	0	0	0	0	0.449275	0	0	0	0	0.111111	0	0	0	0.181609	0	0.433243	0	0	0	0	0	0	0	0	0	0	0	0.438596	0	0	0	0	1	0	0.062585	0	0	0	0	0	0.449275
lib230331_AACGTCAGTACGAGTG-1	0.0748299	0.0666667	0	0.113131	0	0	0	0.197674	0.308917	0	0	0.187335	0	0.2	0	0.5	0	0.308244	0	0	0	0.222989	0	0.269755	0	0	0	0.284585	0	0	0.164474	0	0	0.282353	0	0	0	0	0	0	0.746914	0	0.141497	0.113131	0	0.197674	0.308917	0.187335	0.2
lib230331_ACAACCACACGTACTA-1	0	0.062585	0	0	0	0	0	0	0	0	0	0	0.449275	0	0	0	0	0.111111	0	0	0	0.181609	0	0.433243	0	0	0	0	0	0	0	0	0	0	0	0.438596	0	0	0	0	1	0	0.062585	0	0	0	0	0	0.449275
lib230331_AGATCCAAGTTCTCTT-1	0	0.062585	0	0	0	0	0	0	0	0	0	0	0.449275	0	0	0	0	0.111111	0	0	0	0.181609	0	0.433243	0	0	0	0	0	0	0	0	0	0	0	0.438596	0	0	0	0	1	0	0.062585	0	0	0	0	0	0.449275
lib230331_AGATCGTCATTGTACG-1	0.0748299	0.0666667	0	0.113131	0	0	0	0.197674	0.308917	0	0	0.187335	0	0.2	0	0.5	0	0.308244	0	0	0	0.222989	0	0.269755	0	0	0	0.284585	0	0	0.164474	0	0	0.282353	0	0	0	0	0	0	0.746914	0	0.141497	0.113131	0	0.197674	0.308917	0.187335	0.2
lib230331_AGGTGTTAGCTACTAC-1	0	0.062585	0	0	0	0	0	0	0	0	0	0	0.449275	0	0	0	0	0.111111	0	0	0	0.181609	0	0.433243	0	0	0	0	0	0	0	0	0	0	0	0.438596	0	0	0	0	1	0	0.062585	0	0	0	0	0	0.449275
lib230331_AGTGATCAGGTCGACA-1	0	0.062585	0	0	0	0	0	0	0	0	0	0	0.449275	0	0	0	0	0.111111	0	0	0	0.181609	0	0.433243	0	0	0	0	0	0	0	0	0	0	0	0.438596	0	0	0	0	1	0	0.062585	0	0	0	0	0	0.449275
lib230331_ATATCCTTCCGTGTAA-1	0	0.062585	0	0	0	0	0	0	0	0	0	0	0.449275	0	0	0	0	0.111111	0	0	0	0.181609	0	0.433243	0	0	0	0	0	0	0	0	0	0	0	0.438596	0	0	0	0	1	0	0.062585	0	0	0	0	0	0.449275
lib230331_ATCCACCTCCATTGGA-1	0	0.062585	0	0	0	0	0	0	0	0	0	0	0.449275	0	0	0	0	0.111111	0	0	0	0.181609	0	0.433243	0	0	0	0	0	0	0	0	0	0	0	0.438596	0	0	0	0	1	0	0.062585	0	0	0	0	0	0.449275
lib230331_ATCCCTGCATTGAAAG-1	0	0.062585	0	0	0	0	0	0	0	0	0	0	0.449275	0	0	0	0	0.111111	0	0	0	0.181609	0	0.433243	0	0	0	0	0	0	0	0	0	0	0	0.438596	0	0	0	0	1	0	0.062585	0	0	0	0	0	0.449275
lib230331_ATCTTCAAGCACACAG-1	0	0.062585	0	0	0	0	0	0	0	0	0	0	0.449275	0	0	0	0	0.111111	0	0	0	0.181609	0	0.433243	0	0	0	0	0	0	0	0	0	0	0	0.438596	0	0	0	0	1	0	0.062585	0	0	0	0	0	0.449275
lib230331_ATTGGGTAGTCAGGGT-1	0	0.062585	0	0	0	0	0	0	0	0	0	0	0.449275	0	0	0	0	0.111111	0	0	0	0.181609	0	0.433243	0	0	0	0	0	0	0	0	0	0	0	0.438596	0	0	0	0	1	0	0.062585	0	0	0	0	0	0.449275
lib230331_ATTTACCCATACAGAA-1	0	0.062585	0	0	0	0	0	0	0	0	0	0	0.449275	0	0	0	0	0.111111	0	0	0	0.181609	0	0.433243	0	0	0	0	0	0	0	0	0	0	0	0.438596	0	0	0	0	1	0	0.062585	0	0	0	0	0	0.449275
lib230331_ATTTCTGGTGGCCTCA-1	0	0.062585	0	0	0	0	0	0	0	0	0	0	0.449275	0	0	0	0	0.111111	0	0	0	0.181609	0	0.433243	0	0	0	0	0	0	0	0	0	0	0	0.438596	0	0	0	0	1	0	0.062585	0	0	0	0	0	0.449275
lib230331_CACCGTTTCGAGCCTG-1	0.0748299	0.0666667	0	0.113131	0	0	0	0.197674	0.308917	0	0	0.187335	0	0.2	0	0.5	0	0.308244	0	0	0	0.222989	0	0.269755	0	0	0	0.284585	0	0	0.164474	0	0	0.282353	0	0	0	0	0	0	0.746914	0	0.141497	0.113131	0	0.197674	0.308917	0.187335	0.2
lib230331_CACTGTCAGGAGAATG-1	0	0.062585	0	0	0	0	0	0	0	0	0	0	0.449275	0	0	0	0	0.111111	0	0	0	0.181609	0	0.433243	0	0	0	0	0	0	0	0	0	0	0	0.438596	0	0	0	0	1	0	0.062585	0	0	0	0	0	0.449275
lib230331_CAGGGCTTCAGTGCGC-1	0	0.062585	0	0	0	0	0	0	0	0	0	0	0.449275	0	0	0	0	0.111111	0	0	0	0.181609	0	0.433243	0	0	0	0	0	0	0	0	0	0	0	0.438596	0	0	0	0	1	0	0.062585	0	0	0	0	0	0.449275
lib230331_CATCCCATCCGATAAC-1	0.0748299	0.0666667	0	0.113131	0	0	0	0.197674	0.308917	0	0	0.187335	0	0.2	0	0.5	0	0.308244	0	0	0	0.222989	0	0.269755	0	0	0	0.284585	0	0	0.164474	0	0	0.282353	0	0	0	0	0	0	0.746914	0	0.141497	0.113131	0	0.197674	0.308917	0.187335	0.2
lib230331_CATGGATTCCCATTCG-1	0	0.062585	0	0	0	0	0	0	0	0	0	0	0.449275	0	0	0	0	0.111111	0	0	0	0.181609	0	0.433243	0	0	0	0	0	0	0	0	0	0	0	0.438596	0	0	0	0	1	0	0.062585	0	0	0	0	0	0.449275
lib230331_CCAATGAAGTAAACTG-1	0.0748299	0.0666667	0	0.113131	0	0	0	0.197674	0.308917	0	0	0.187335	0	0.2	0	0.5	0	0.308244	0	0	0	0.222989	0	0.269755	0	0	0	0.284585	0	0	0.164474	0	0	0.282353	0	0	0	0	0	0	0.746914	0	0.141497	0.113131	0	0.197674	0.308917	0.187335	0.2
lib230331_CCAATTTTCGGACCAC-1	0	0.062585	0	0	0	0	0	0	0	0	0	0	0.449275	0	0	0	0	0.111111	0	0	0	0.181609	0	0.433243	0	0	0	0	0	0	0	0	0	0	0	0.438596	0	0	0	0	1	0	0.062585	0	0	0	0	0	0.449275
lib230331_CCATAAGAGACTTGTC-1	0	0.062585	0	0	0	0	0	0	0	0	0	0	0.449275	0	0	0	0	0.111111	0	0	0	0.181609	0	0.433243	0	0	0	0	0	0	0	0	0	0	0	0.438596	0	0	0	0	1	0	0.062585	0	0	0	0	0	0.449275
lib230331_CCGATGGGTACACGCC-1	0	0.062585	0	0	0	0	0	0	0	0	0	0	0.449275	0	0	0	0	0.111111	0	0	0	0.181609	0	0.433243	0	0	0	0	0	0	0	0	0	0	0	0.438596	0	0	0	0	1	0	0.062585	0	0	0	0	0	0.449275
lib230331_CCGGTGATCACCTGGG-1	0	0.062585	0	0	0	0	0	0	0	0	0	0	0.449275	0	0	0	0	0.111111	0	0	0	0.181609	0	0.433243	0	0	0	0	0	0	0	0	0	0	0	0.438596	0	0	0	0	1	0	0.062585	0	0	0	0	0	0.449275
lib230331_CCTAACCCACGCACCA-1	0	0.062585	0	0	0	0	0	0	0	0	0	0	0.449275	0	0	0	0	0.111111	0	0	0	0.181609	0	0.433243	0	0	0	0	0	0	0	0	0	0	0	0.438596	0	0	0	0	1	0	0.062585	0	0	0	0	0	0.449275
lib230331_CCTCCTCCACTACGGC-1	0	0.062585	0	0	0	0	0	0	0	0	0	0	0.449275	0	0	0	0	0.111111	0	0	0	0.181609	0	0.433243	0	0	0	0	0	0	0	0	0	0	0	0.438596	0	0	0	0	1	0	0.062585	0	0	0	0	0	0.449275
lib230331_CGAGGCTCAGTGGCTC-1	0	0.062585	0	0	0	0	0	0	0	0	0	0	0.449275	0	0	0	0	0.111111	0	0	0	0.181609	0	0.433243	0	0	0	0	0	0	0	0	0	0	0	0.438596	0	0	0	0	1	0	0.062585	0	0	0	0	0	0.449275
lib230331_CGAGTGCTCACTGCTC-1	0	0.062585	0	0	0	0	0	0	0	0	0	0	0.449275	0	0	0	0	0.111111	0	0	0	0.181609	0	0.433243	0	0	0	0	0	0	0	0	0	0	0	0.438596	0	0	0	0	1	0	0.062585	0	0	0	0	0	0.449275
lib230331_CGAGTTACACATCATG-1	0	0.062585	0	0	0	0	0	0	0	0	0	0	0.449275	0	0	0	0	0.111111	0	0	0	0.181609	0	0.433243	0	0	0	0	0	0	0	0	0	0	0	0.438596	0	0	0	0	1	0	0.062585	0	0	0	0	0	0.449275
lib230331_CGGAATTTCGCTGACG-1	0.0748299	0.0666667	0	0.113131	0	0	0	0.197674	0.308917	0	0	0.187335	0	0.2	0	0.5	0	0.308244	0	0	0	0.222989	0	0.269755	0	0	0	0.284585	0	0	0.164474	0	0	0.282353	0	0	0	0	0	0	0.746914	0	0.141497	0.113131	0	0.197674	0.308917	0.187335	0.2
lib230331_CGTTGGGTCAACCGAT-1	0	0.062585	0	0	0	0	0	0	0	0	0	0	0.449275	0	0	0	0	0.111111	0	0	0	0.181609	0	0.433243	0	0	0	0	0	0	0	0	0	0	0	0.438596	0	0	0	0	1	0	0.062585	0	0	0	0	0	0.449275
lib230331_CTACATTAGACCAGAC-1	0	0.062585	0	0	0	0	0	0	0	0	0	0	0.449275	0	0	0	0	0.111111	0	0	0	0.181609	0	0.433243	0	0	0	0	0	0	0	0	0	0	0	0.438596	0	0	0	0	1	0	0.062585	0	0	0	0	0	0.449275
lib230331_CTACATTTCGACCCAG-1	0	0.062585	0	0	0	0	0	0	0	0	0	0	0.449275	0	0	0	0	0.111111	0	0	0	0.181609	0	0.433243	0	0	0	0	0	0	0	0	0	0	0	0.438596	0	0	0	0	1	0	0.062585	0	0	0	0	0	0.449275
lib230331_CTACATTTCTTGCAAG-1	0	0.062585	0	0	0	0	0	0	0	0	0	0	0.449275	0	0	0	0	0.111111	0	0	0	0.181609	0	0.433243	0	0	0	0	0	0	0	0	0	0	0	0.438596	0	0	0	0	1	0	0.062585	0	0	0	0	0	0.449275
lib230331_CTACCTGTCTGGGATT-1	0	0.062585	0	0	0	0	0	0	0	0	0	0	0.449275	0	0	0	0	0.111111	0	0	0	0.181609	0	0.433243	0	0	0	0	0	0	0	0	0	0	0	0.438596	0	0	0	0	1	0	0.062585	0	0	0	0	0	0.449275
lib230331_CTAGACAAGCGCTTCG-1	0	0.062585	0	0	0	0	0	0	0	0	0	0	0.449275	0	0	0	0	0.111111	0	0	0	0.181609	0	0.433243	0	0	0	0	0	0	0	0	0	0	0	0.438596	0	0	0	0	1	0	0.062585	0	0	0	0	0	0.449275
lib230331_CTCAAGAGTAATGATG-1	0.0748299	0.0666667	0	0.113131	0	0	0	0.197674	0.308917	0	0	0.187335	0	0.2	0	0.5	0	0.308244	0	0	0	0.222989	0	0.269755	0	0	0	0.284585	0	0	0.164474	0	0	0.282353	0	0	0	0	0	0	0.746914	0	0.141497	0.113131	0	0.197674	0.308917	0.187335	0.2
lib230331_CTGCTCACAGCTTCGG-1	0	0.062585	0	0	0	0	0	0	0	0	0	0	0.449275	0	0	0	0	0.111111	0	0	0	0.181609	0	0.433243	0	0	0	0	0	0	0	0	0	0	0	0.438596	0	0	0	0	1	0	0.062585	0	0	0	0	0	0.449275
lib230331_CTGTACCGTTACCGTA-1	0	0.062585	0	0	0	0	0	0	0	0	0	0	0.449275	0	0	0	0	0.111111	0	0	0	0.181609	0	0.433243	0	0	0	0	0	0	0	0	0	0	0	0.438596	0	0	0	0	1	0	0.062585	0	0	0	0	0	0.449275
lib230331_CTTCAATGTCCACAGC-1	0	0.062585	0	0	0	0	0	0	0	0	0	0	0.449275	0	0	0	0	0.111111	0	0	0	0.181609	0	0.433243	0	0	0	0	0	0	0	0	0	0	0	0.438596	0	0	0	0	1	0	0.062585	0	0	0	0	0	0.449275
lib230331_CTTTCGGTCTCATGCC-1	0	0.062585	0	0	0	0	0	0	0	0	0	0	0.449275	0	0	0	0	0.111111	0	0	0	0.181609	0	0.433243	0	0	0	0	0	0	0	0	0	0	0	0.438596	0	0	0	0	1	0	0.062585	0	0	0	0	0	0.449275
lib230331_GAACACTCAACGTATC-1	0	0.062585	0	0	0	0	0	0	0	0	0	0	0.449275	0	0	0	0	0.111111	0	0	0	0.181609	0	0.433243	0	0	0	0	0	0	0	0	0	0	0	0.438596	0	0	0	0	1	0	0.062585	0	0	0	0	0	0.449275
lib230331_GACTCAAGTACCATAC-1	0	0.062585	0	0	0	0	0	0	0	0	0	0	0.449275	0	0	0	0	0.111111	0	0	0	0.181609	0	0.433243	0	0	0	0	0	0	0	0	0	0	0	0.438596	0	0	0	0	1	0	0.062585	0	0	0	0	0	0.449275
lib230331_GAGGCAACAGCTAACT-1	0	0.062585	0	0	0	0	0	0	0	0	0	0	0.449275	0	0	0	0	0.111111	0	0	0	0.181609	0	0.433243	0	0	0	0	0	0	0	0	0	0	0	0.438596	0	0	0	0	1	0	0.062585	0	0	0	0	0	0.449275
lib230331_GAGGGATCAACTCCAA-1	0	0.062585	0	0	0	0	0	0	0	0	0	0	0.449275	0	0	0	0	0.111111	0	0	0	0.181609	0	0.433243	0	0	0	0	0	0	0	0	0	0	0	0.438596	0	0	0	0	1	0	0.062585	0	0	0	0	0	0.449275
lib230331_GATTCGACAGCAGACA-1	0	0.062585	0	0	0	0	0	0	0	0	0	0	0.449275	0	0	0	0	0.111111	0	0	0	0.181609	0	0.433243	0	0	0	0	0	0	0	0	0	0	0	0.438596	0	0	0	0	1	0	0.062585	0	0	0	0	0	0.449275
lib230331_GATTTCTAGACTCTTG-1	0	0.062585	0	0	0	0	0	0	0	0	0	0	0.449275	0	0	0	0	0.111111	0	0	0	0.181609	0	0.433243	0	0	0	0	0	0	0	0	0	0	0	0.438596	0	0	0	0	1	0	0.062585	0	0	0	0	0	0.449275
lib230331_GCAACATCAATCGCAT-1	0	0.062585	0	0	0	0	0	0	0	0	0	0	0.449275	0	0	0	0	0.111111	0	0	0	0.181609	0	0.433243	0	0	0	0	0	0	0	0	0	0	0	0.438596	0	0	0	0	1	0	0.062585	0	0	0	0	0	0.449275
lib230331_GCACATAAGGAAGTAG-1	0	0.062585	0	0	0	0	0	0	0	0	0	0	0.449275	0	0	0	0	0.111111	0	0	0	0.181609	0	0.433243	0	0	0	0	0	0	0	0	0	0	0	0.438596	0	0	0	0	1	0	0.062585	0	0	0	0	0	0.449275
lib230331_GCCAACGTCGTGACTA-1	0.0748299	0.0666667	0	0.113131	0	0	0	0.197674	0.308917	0	0	0.187335	0	0.2	0	0.5	0	0.308244	0	0	0	0.222989	0	0.269755	0	0	0	0.284585	0	0	0.164474	0	0	0.282353	0	0	0	0	0	0	0.746914	0	0.141497	0.113131	0	0.197674	0.308917	0.187335	0.2
lib230331_GCCTGTTGTAGATGTA-1	0	0.062585	0	0	0	0	0	0	0	0	0	0	0.449275	0	0	0	0	0.111111	0	0	0	0.181609	0	0.433243	0	0	0	0	0	0	0	0	0	0	0	0.438596	0	0	0	0	1	0	0.062585	0	0	0	0	0	0.449275
lib230331_GCGATCGAGGACAAGA-1	0	0.062585	0	0	0	0	0	0	0	0	0	0	0.449275	0	0	0	0	0.111111	0	0	0	0.181609	0	0.433243	0	0	0	0	0	0	0	0	0	0	0	0.438596	0	0	0	0	1	0	0.062585	0	0	0	0	0	0.449275
lib230331_GCTCAAAAGCACACAG-1	0	0.062585	0	0	0	0	0	0	0	0	0	0	0.449275	0	0	0	0	0.111111	0	0	0	0.181609	0	0.433243	0	0	0	0	0	0	0	0	0	0	0	0.438596	0	0	0	0	1	0	0.062585	0	0	0	0	0	0.449275
lib230331_GGAGGATAGACTACGG-1	0	0.062585	0	0	0	0	0	0	0	0	0	0	0.449275	0	0	0	0	0.111111	0	0	0	0.181609	0	0.433243	0	0	0	0	0	0	0	0	0	0	0	0.438596	0	0	0	0	1	0	0.062585	0	0	0	0	0	0.449275
lib230331_GGGTTATGTTCCGGTG-1	0	0.062585	0	0	0	0	0	0	0	0	0	0	0.449275	0	0	0	0	0.111111	0	0	0	0.181609	0	0.433243	0	0	0	0	0	0	0	0	0	0	0	0.438596	0	0	0	0	1	0	0.062585	0	0	0	0	0	0.449275
lib230331_GGTGATTAGAAGCTGC-1	0	0.062585	0	0	0	0	0	0	0	0	0	0	0.449275	0	0	0	0	0.111111	0	0	0	0.181609	0	0.433243	0	0	0	0	0	0	0	0	0	0	0	0.438596	0	0	0	0	1	0	0.062585	0	0	0	0	0	0.449275
lib230331_GTAACCAAGATGCTGG-1	0	0.062585	0	0	0	0	0	0	0	0	0	0	0.449275	0	0	0	0	0.111111	0	0	0	0.181609	0	0.433243	0	0	0	0	0	0	0	0	0	0	0	0.438596	0	0	0	0	1	0	0.062585	0	0	0	0	0	0.449275
lib230331_GTCCTCAAGGAAAGGT-1	0	0.062585	0	0	0	0	0	0	0	0	0	0	0.449275	0	0	0	0	0.111111	0	0	0	0.181609	0	0.433243	0	0	0	0	0	0	0	0	0	0	0	0.438596	0	0	0	0	1	0	0.062585	0	0	0	0	0	0.449275
lib230331_GTGGAGAGTTGTGGCC-1	0	0.062585	0	0	0	0	0	0	0	0	0	0	0.449275	0	0	0	0	0.111111	0	0	0	0.181609	0	0.433243	0	0	0	0	0	0	0	0	0	0	0	0.438596	0	0	0	0	1	0	0.062585	0	0	0	0	0	0.449275
lib230331_GTGTAACTCACTCTTA-1	0	0.062585	0	0	0	0	0	0	0	0	0	0	0.449275	0	0	0	0	0.111111	0	0	0	0.181609	0	0.433243	0	0	0	0	0	0	0	0	0	0	0	0.438596	0	0	0	0	1	0	0.062585	0	0	0	0	0	0.449275
lib230331_TAACCAGCATGTAACC-1	0	0.062585	0	0	0	0	0	0	0	0	0	0	0.449275	0	0	0	0	0.111111	0	0	0	0.181609	0	0.433243	0	0	0	0	0	0	0	0	0	0	0	0.438596	0	0	0	0	1	0	0.062585	0	0	0	0	0	0.449275
lib230331_TAACGACAGGATACCG-1	0	0.062585	0	0	0	0	0	0	0	0	0	0	0.449275	0	0	0	0	0.111111	0	0	0	0.181609	0	0.433243	0	0	0	0	0	0	0	0	0	0	0	0.438596	0	0	0	0	1	0	0.062585	0	0	0	0	0	0.449275
lib230331_TAAGCCAGTTTACCTT-1	0	0.062585	0	0	0	0	0	0	0	0	0	0	0.449275	0	0	0	0	0.111111	0	0	0	0.181609	0	0.433243	0	0	0	0	0	0	0	0	0	0	0	0.438596	0	0	0	0	1	0	0.062585	0	0	0	0	0	0.449275
lib230331_TACCGGGAGTCATAGA-1	0	0.062585	0	0	0	0	0	0	0	0	0	0	0.449275	0	0	0	0	0.111111	0	0	0	0.181609	0	0.433243	0	0	0	0	0	0	0	0	0	0	0	0.438596	0	0	0	0	1	0	0.062585	0	0	0	0	0	0.449275
lib230331_TACCGGGAGTCATGGA-1	0	0.062585	0	0	0	0	0	0	0	0	0	0	0.449275	0	0	0	0	0.111111	0	0	0	0.181609	0	0.433243	0	0	0	0	0	0	0	0	0	0	0	0.438596	0	0	0	0	1	0	0.062585	0	0	0	0	0	0.449275
lib230331_TCAATTCCAATCCTTT-1	0	0.062585	0	0	0	0	0	0	0	0	0	0	0.449275	0	0	0	0	0.111111	0	0	0	0.181609	0	0.433243	0	0	0	0	0	0	0	0	0	0	0	0.438596	0	0	0	0	1	0	0.062585	0	0	0	0	0	0.449275
lib230331_TCACGGGTCCGAAGGA-1	0	0.062585	0	0	0	0	0	0	0	0	0	0	0.449275	0	0	0	0	0.111111	0	0	0	0.181609	0	0.433243	0	0	0	0	0	0	0	0	0	0	0	0.438596	0	0	0	0	1	0	0.062585	0	0	0	0	0	0.449275
lib230331_TCAGCCTAGTTATGGA-1	0	0.062585	0	0	0	0	0	0	0	0	0	0	0.449275	0	0	0	0	0.111111	0	0	0	0.181609	0	0.433243	0	0	0	0	0	0	0	0	0	0	0	0.438596	0	0	0	0	1	0	0.062585	0	0	0	0	0	0.449275
lib230331_TCCTTCTTCCATACTT-1	0	0.062585	0	0	0	0	0	0	0	0	0	0	0.449275	0	0	0	0	0.111111	0	0	0	0.181609	0	0.433243	0	0	0	0	0	0	0	0	0	0	0	0.438596	0	0	0	0	1	0	0.062585	0	0	0	0	0	0.449275
lib230331_TCCTTTCAGTCGCCAC-1	0	0.062585	0	0	0	0	0	0	0	0	0	0	0.449275	0	0	0	0	0.111111	0	0	0	0.181609	0	0.433243	0	0	0	0	0	0	0	0	0	0	0	0.438596	0	0	0	0	1	0	0.062585	0	0	0	0	0	0.449275
lib230331_TCGATTTTCATGCCGG-1	0	0.062585	0	0	0	0	0	0	0	0	0	0	0.449275	0	0	0	0	0.111111	0	0	0	0.181609	0	0.433243	0	0	0	0	0	0	0	0	0	0	0	0.438596	0	0	0	0	1	0	0.062585	0	0	0	0	0	0.449275
lib230331_TCGGGACAGACCATAA-1	0	0.062585	0	0	0	0	0	0	0	0	0	0	0.449275	0	0	0	0	0.111111	0	0	0	0.181609	0	0.433243	0	0	0	0	0	0	0	0	0	0	0	0.438596	0	0	0	0	1	0	0.062585	0	0	0	0	0	0.449275
lib230331_TCTACATCATCCGAGC-1	0	0.062585	0	0	0	0	0	0	0	0	0	0	0.449275	0	0	0	0	0.111111	0	0	0	0.181609	0	0.433243	0	0	0	0	0	0	0	0	0	0	0	0.438596	0	0	0	0	1	0	0.062585	0	0	0	0	0	0.449275
lib230331_TCTCTGGTCCAACTGA-1	0.0748299	0.0666667	0	0.113131	0	0	0	0.197674	0.308917	0	0	0.187335	0	0.2	0	0.5	0	0.308244	0	0	0	0.222989	0	0.269755	0	0	0	0.284585	0	0	0.164474	0	0	0.282353	0	0	0	0	0	0	0.746914	0	0.141497	0.113131	0	0.197674	0.308917	0.187335	0.2
lib230331_TCTCTGGTCTTTGCGC-1	0	0.062585	0	0	0	0	0	0	0	0	0	0	0.449275	0	0	0	0	0.111111	0	0	0	0.181609	0	0.433243	0	0	0	0	0	0	0	0	0	0	0	0.438596	0	0	0	0	1	0	0.062585	0	0	0	0	0	0.449275
lib230331_TCTGCCAAGCGTCAAG-1	0.0748299	0.0666667	0	0.113131	0	0	0	0.197674	0.308917	0	0	0.187335	0	0.2	0	0.5	0	0.308244	0	0	0	0.222989	0	0.269755	0	0	0	0.284585	0	0	0.164474	0	0	0.282353	0	0	0	0	0	0	0.746914	0	0.141497	0.113131	0	0.197674	0.308917	0.187335	0.2
lib230331_TGAGCATCATGTTCAG-1	0	0.062585	0	0	0	0	0	0	0	0	0	0	0.449275	0	0	0	0	0.111111	0	0	0	0.181609	0	0.433243	0	0	0	0	0	0	0	0	0	0	0	0.438596	0	0	0	0	1	0	0.062585	0	0	0	0	0	0.449275
lib230331_TGCGGCACAGCAGGAT-1	0	0.062585	0	0	0	0	0	0	0	0	0	0	0.449275	0	0	0	0	0.111111	0	0	0	0.181609	0	0.433243	0	0	0	0	0	0	0	0	0	0	0	0.438596	0	0	0	0	1	0	0.062585	0	0	0	0	0	0.449275
lib230331_TGCTCGTCATCCGATA-1	0	0.062585	0	0	0	0	0	0	0	0	0	0	0.449275	0	0	0	0	0.111111	0	0	0	0.181609	0	0.433243	0	0	0	0	0	0	0	0	0	0	0	0.438596	0	0	0	0	1	0	0.062585	0	0	0	0	0	0.449275
lib230331_TGCTTGCCACGATTCA-1	0	0.062585	0	0	0	0	0	0	0	0	0	0	0.449275	0	0	0	0	0.111111	0	0	0	0.181609	0	0.433243	0	0	0	0	0	0	0	0	0	0	0	0.438596	0	0	0	0	1	0	0.062585	0	0	0	0	0	0.449275
lib230331_TGGGAGACAGATAAAC-1	0	0.062585	0	0	0	0	0	0	0	0	0	0	0.449275	0	0	0	0	0.111111	0	0	0	0.181609	0	0.433243	0	0	0	0	0	0	0	0	0	0	0	0.438596	0	0	0	0	1	0	0.062585	0	0	0	0	0	0.449275
lib230331_TGGGTTAGTGCCGTAC-1	0	0.062585	0	0	0	0	0	0	0	0	0	0	0.449275	0	0	0	0	0.111111	0	0	0	0.181609	0	0.433243	0	0	0	0	0	0	0	0	0	0	0	0.438596	0	0	0	0	1	0	0.062585	0	0	0	0	0	0.449275
lib230331_TTAATCCTCGCTCTCA-1	0	0.062585	0	0	0	0	0	0	0	0	0	0	0.449275	0	0	0	0	0.111111	0	0	0	0.181609	0	0.433243	0	0	0	0	0	0	0	0	0	0	0	0.438596	0	0	0	0	1	0	0.062585	0	0	0	0	0	0.449275
lib230331_TTAATCCTCTACAGGT-1	0	0.062585	0	0	0	0	0	0	0	0	0	0	0.449275	0	0	0	0	0.111111	0	0	0	0.181609	0	0.433243	0	0	0	0	0	0	0	0	0	0	0	0.438596	0	0	0	0	1	0	0.062585	0	0	0	0	0	0.449275
lib230331_TTACGCCCACGTGTGC-1	0	0.062585	0	0	0	0	0	0	0	0	0	0	0.449275	0	0	0	0	0.111111	0	0	0	0.181609	0	0.433243	0	0	0	0	0	0	0	0	0	0	0	0.438596	0	0	0	0	1	0	0.062585	0	0	0	0	0	0.449275
lib230331_TTCATGTTCCTGGGTG-1	0	0.062585	0	0	0	0	0	0	0	0	0	0	0.449275	0	0	0	0	0.111111	0	0	0	0.181609	0	0.433243	0	0	0	0	0	0	0	0	0	0	0	0.438596	0	0	0	0	1	0	0.062585	0	0	0	0	0	0.449275
lib230331_TTCATTGTCCTTATGT-1	0	0.062585	0	0	0	0	0	0	0	0	0	0	0.449275	0	0	0	0	0.111111	0	0	0	0.181609	0	0.433243	0	0	0	0	0	0	0	0	0	0	0	0.438596	0	0	0	0	1	0	0.062585	0	0	0	0	0	0.449275
lib230331_TTCTAGTTCACTGAAC-1	0	0.062585	0	0	0	0	0	0	0	0	0	0	0.449275	0	0	0	0	0.111111	0	0	0	0.181609	0	0.433243	0	0	0	0	0	0	0	0	0	0	0	0.438596	0	0	0	0	1	0	0.062585	0	0	0	0	0	0.449275
lib230331_TTGGGCGTCCCGATCT-1	0.0748299	0.0666667	0	0.113131	0	0	0	0.197674	0.308917	0	0	0.187335	0	0.2	0	0.5	0	0.308244	0	0	0	0.222989	0	0.269755	0	0	0	0.284585	0	0	0.164474	0	0	0.282353	0	0	0	0	0	0	0.746914	0	0.141497	0.113131	0	0.197674	0.308917	0.187335	0.2
lib230331_TTTACGTTCTGAACGT-1	0	0.062585	0	0	0	0	0	0	0	0	0	0	0.449275	0	0	0	0	0.111111	0	0	0	0.181609	0	0.433243	0	0	0	0	0	0	0	0	0	0	0	0.438596	0	0	0	0	1	0	0.062585	0	0	0	0	0	0.449275
lib230331_AAACCCATCTCCCAAC-1	0	0	0	0	0	0	0	0	0	0	0	0	0	0	0	0	0	0	0	0	0	0	0	0	0	0	0	0	0	0	0	0	0	0	0	0	0	0	0	0	0	0	0	0	0	0	0	0	0
lib230331_AACCACATCAGGACAG-1	0	0	0	0	0	0	0	0	0	0	0	0	0	0	0	0	0	0	0	0	0	0	0	0	0	0	0	0	0	0	0	0	0	0	0	0	0	0	0	0	0	0	0	0	0	0	0	0	0
lib230331_AACGGGATCTAAGAAG-1	0	0	0	0	0	0	0	0	0	0	0	0	0	0	0	0	0	0	0	0	0	0	0	0	0	0	0	0	0	0	0	0	0	0	0	0	0	0	0	0	0	0	0	0	0	0	0	0	0
lib230331_AATGGCTGTTTGAACC-1	0	0	0	0	0	0	0	0	0	0	0	0	0	0	0	0	0	0	0	0	0	0	0	0	0	0	0	0	0	0	0	0	0	0	0	0	0	0	0	0	0	0	0	0	0	0	0	0	0
lib230331_ACACAGTCAGGCCCTA-1	0	0	0	0	0	0	0	0	0	0	0	0	0	0	0	0	0	0	0	0	0	0	0	0	0	0	0	0	0	0	0	0	0	0	0	0	0	0	0	0	0	0	0	0	0	0	0	0	0
lib230331_ACCCTCATCCGACGGT-1	0	0	0	0	0	0	0	0	0	0	0	0	0	0	0	0	0	0	0	0	0	0	0	0	0	0	0	0	0	0	0	0	0	0	0	0	0	0	0	0	0	0	0	0	0	0	0	0	0
lib230331_ACCCTCATCTTGGTGA-1	0	0	0	0	0	0	0	0	0	0	0	0	0	0	0	0	0	0	0	0	0	0	0	0	0	0	0	0	0	0	0	0	0	0	0	0	0	0	0	0	0	0	0	0	0	0	0	0	0
lib230331_ACTTCCGCATAATGAG-1	0	0	0	0	0	0	0	0	0	0	0	0	0	0	0	0	0	0	0	0	0	0	0	0	0	0	0	0	0	0	0	0	0	0	0	0	0	0	0	0	0	0	0	0	0	0	0	0	0
lib230331_AGACACTGTACTAGCT-1	0	0	0	0	0	0	0	0	0	0	0	0	0	0	0	0	0	0	0	0	0	0	0	0	0	0	0	0	0	0	0	0	0	0	0	0	0	0	0	0	0	0	0	0	0	0	0	0	0
lib230331_AGAGCCCAGAAGCGCT-1	0	0	0	0	0	0	0	0	0	0	0	0	0	0	0	0	0	0	0	0	0	0	0	0	0	0	0	0	0	0	0	0	0	0	0	0	0	0	0	0	0	0	0	0	0	0	0	0	0
lib230331_AGGGCTCGTAGCGTAG-1	0	0	0	0	0	0	0	0	0	0	0	0	0	0	0	0	0	0	0	0	0	0	0	0	0	0	0	0	0	0	0	0	0	0	0	0	0	0	0	0	0	0	0	0	0	0	0	0	0
lib230331_AGGGTTTAGAAGCTCG-1	0	0	0	0	0	0	0	0	0	0	0	0	0	0	0	0	0	0	0	0	0	0	0	0	0	0	0	0	0	0	0	0	0	0	0	0	0	0	0	0	0	0	0	0	0	0	0	0	0
lib230331_AGTCATGTCTGTCGTC-1	0	0	0	0	0	0	0	0	0	0	0	0	0	0	0	0	0	0	0	0	0	0	0	0	0	0	0	0	0	0	0	0	0	0	0	0	0	0	0	0	0	0	0	0	0	0	0	0	0
lib230331_ATACTTCAGAAGGGAT-1	0	0	0	0	0	0	0	0	0	0	0	0	0	0	0	0	0	0	0	0	0	0	0	0	0	0	0	0	0	0	0	0	0	0	0	0	0	0	0	0	0	0	0	0	0	0	0	0	0
lib230331_ATCATTCCAAGAAACT-1	0	0	0	0	0	0	0	0	0	0	0	0	0	0	0	0	0	0	0	0	0	0	0	0	0	0	0	0	0	0	0	0	0	0	0	0	0	0	0	0	0	0	0	0	0	0	0	0	0
lib230331_ATGGAGGTCGGAGATG-1	0	0	0	0	0	0	0	0	0	0	0	0	0	0	0	0	0	0	0	0	0	0	0	0	0	0	0	0	0	0	0	0	0	0	0	0	0	0	0	0	0	0	0	0	0	0	0	0	0
lib230331_ATGGTTGTCACGAGGA-1	0	0	0	0	0	0	0	0	0	0	0	0	0	0	0	0	0	0	0	0	0	0	0	0	0	0	0	0	0	0	0	0	0	0	0	0	0	0	0	0	0	0	0	0	0	0	0	0	0
lib230331_CAGGCCAAGCGTGAAC-1	0	0	0	0	0	0	0	0	0	0	0	0	0	0	0	0	0	0	0	0	0	0	0	0	0	0	0	0	0	0	0	0	0	0	0	0	0	0	0	0	0	0	0	0	0	0	0	0	0
lib230331_CATTTCAGTCGTCATA-1	0	0	0	0	0	0	0	0	0	0	0	0	0	0	0	0	0	0	0	0	0	0	0	0	0	0	0	0	0	0	0	0	0	0	0	0	0	0	0	0	0	0	0	0	0	0	0	0	0
lib230331_CCGATGGGTGTCTCCT-1	0	0	0	0	0	0	0	0	0	0	0	0	0	0	0	0	0	0	0	0	0	0	0	0	0	0	0	0	0	0	0	0	0	0	0	0	0	0	0	0	0	0	0	0	0	0	0	0	0
lib230331_CCGGTAGTCCGGCTTT-1	0	0	0	0	0	0	0	0	0	0	0	0	0	0	0	0	0	0	0	0	0	0	0	0	0	0	0	0	0	0	0	0	0	0	0	0	0	0	0	0	0	0	0	0	0	0	0	0	0
lib230331_CCGTGAGCACTTGGCG-1	0	0	0	0	0	0	0	0	0	0	0	0	0	0	0	0	0	0	0	0	0	0	0	0	0	0	0	0	0	0	0	0	0	0	0	0	0	0	0	0	0	0	0	0	0	0	0	0	0
lib230331_CGAGGAATCGACGCTG-1	0	0	0	0	0	0	0	0	0	0	0	0	0	0	0	0	0	0	0	0	0	0	0	0	0	0	0	0	0	0	0	0	0	0	0	0	0	0	0	0	0	0	0	0	0	0	0	0	0
lib230331_CGGGTGTTCCCGAGAC-1	0	0	0	0	0	0	0	0	0	0	0	0	0	0	0	0	0	0	0	0	0	0	0	0	0	0	0	0	0	0	0	0	0	0	0	0	0	0	0	0	0	0	0	0	0	0	0	0	0
lib230331_CTACATTTCAAAGACA-1	0	0	0	0	0	0	0	0	0	0	0	0	0	0	0	0	0	0	0	0	0	0	0	0	0	0	0	0	0	0	0	0	0	0	0	0	0	0	0	0	0	0	0	0	0	0	0	0	0
lib230331_CTCCAACGTTCGGACC-1	0	0	0	0	0	0	0	0	0	0	0	0	0	0	0	0	0	0	0	0	0	0	0	0	0	0	0	0	0	0	0	0	0	0	0	0	0	0	0	0	0	0	0	0	0	0	0	0	0
lib230331_CTCGAGGCACCAAAGG-1	0	0	0	0	0	0	0	0	0	0	0	0	0	0	0	0	0	0	0	0	0	0	0	0	0	0	0	0	0	0	0	0	0	0	0	0	0	0	0	0	0	0	0	0	0	0	0	0	0
lib230331_CTGTGAACACTGAGTT-1	0	0	0	0	0	0	0	0	0	0	0	0	0	0	0	0	0	0	0	0	0	0	0	0	0	0	0	0	0	0	0	0	0	0	0	0	0	0	0	0	0	0	0	0	0	0	0	0	0
lib230331_CTTCTAAGTGCATACT-1	0	0	0	0	0	0	0	0	0	0	0	0	0	0	0	0	0	0	0	0	0	0	0	0	0	0	0	0	0	0	0	0	0	0	0	0	0	0	0	0	0	0	0	0	0	0	0	0	0
lib230331_CTTTCGGTCGCGTGAC-1	0	0	0	0	0	0	0	0	0	0	0	0	0	0	0	0	0	0	0	0	0	0	0	0	0	0	0	0	0	0	0	0	0	0	0	0	0	0	0	0	0	0	0	0	0	0	0	0	0
lib230331_GACCAATCACTTGGGC-1	0	0	0	0	0	0	0	0	0	0	0	0	0	0	0	0	0	0	0	0	0	0	0	0	0	0	0	0	0	0	0	0	0	0	0	0	0	0	0	0	0	0	0	0	0	0	0	0	0
lib230331_GAGAAATGTCTGTGAT-1	0	0	0	0	0	0	0	0	0	0	0	0	0	0	0	0	0	0	0	0	0	0	0	0	0	0	0	0	0	0	0	0	0	0	0	0	0	0	0	0	0	0	0	0	0	0	0	0	0
lib230331_GATCCCTGTGTGTCCG-1	0	0	0	0	0	0	0	0	0	0	0	0	0	0	0	0	0	0	0	0	0	0	0	0	0	0	0	0	0	0	0	0	0	0	0	0	0	0	0	0	0	0	0	0	0	0	0	0	0
lib230331_GATGCTATCATGAGGG-1	0	0	0	0	0	0	0	0	0	0	0	0	0	0	0	0	0	0	0	0	0	0	0	0	0	0	0	0	0	0	0	0	0	0	0	0	0	0	0	0	0	0	0	0	0	0	0	0	0
lib230331_GCAGCCATCTCCAATT-1	0	0	0	0	0	0	0	0	0	0	0	0	0	0	0	0	0	0	0	0	0	0	0	0	0	0	0	0	0	0	0	0	0	0	0	0	0	0	0	0	0	0	0	0	0	0	0	0	0
lib230331_GCATCTCAGGGATGTC-1	0	0	0	0	0	0	0	0	0	0	0	0	0	0	0	0	0	0	0	0	0	0	0	0	0	0	0	0	0	0	0	0	0	0	0	0	0	0	0	0	0	0	0	0	0	0	0	0	0
lib230331_GGAACCCAGTACCCTA-1	0	0	0	0	0	0	0	0	0	0	0	0	0	0	0	0	0	0	0	0	0	0	0	0	0	0	0	0	0	0	0	0	0	0	0	0	0	0	0	0	0	0	0	0	0	0	0	0	0
lib230331_GGAATCTCAATCGTCA-1	0	0	0	0	0	0	0	0	0	0	0	0	0	0	0	0	0	0	0	0	0	0	0	0	0	0	0	0	0	0	0	0	0	0	0	0	0	0	0	0	0	0	0	0	0	0	0	0	0
lib230331_GGCGTCAGTTCCGCGA-1	0	0	0	0	0	0	0	0	0	0	0	0	0	0	0	0	0	0	0	0	0	0	0	0	0	0	0	0	0	0	0	0	0	0	0	0	0	0	0	0	0	0	0	0	0	0	0	0	0
lib230331_GGTCTGGCAGTCGCTG-1	0	0	0	0	0	0	0	0	0	0	0	0	0	0	0	0	0	0	0	0	0	0	0	0	0	0	0	0	0	0	0	0	0	0	0	0	0	0	0	0	0	0	0	0	0	0	0	0	0
lib230331_GTCCACTCACTTTAGG-1	0	0	0	0	0	0	0	0	0	0	0	0	0	0	0	0	0	0	0	0	0	0	0	0	0	0	0	0	0	0	0	0	0	0	0	0	0	0	0	0	0	0	0	0	0	0	0	0	0
lib230331_GTGAGCCCAATAGTAG-1	0	0	0	0	0	0	0	0	0	0	0	0	0	0	0	0	0	0	0	0	0	0	0	0	0	0	0	0	0	0	0	0	0	0	0	0	0	0	0	0	0	0	0	0	0	0	0	0	0
lib230331_GTTGCTCGTACGCTTA-1	0	0	0	0	0	0	0	0	0	0	0	0	0	0	0	0	0	0	0	0	0	0	0	0	0	0	0	0	0	0	0	0	0	0	0	0	0	0	0	0	0	0	0	0	0	0	0	0	0
lib230331_TAACACGCATCGCTAA-1	0	0	0	0	0	0	0	0	0	0	0	0	0	0	0	0	0	0	0	0	0	0	0	0	0	0	0	0	0	0	0	0	0	0	0	0	0	0	0	0	0	0	0	0	0	0	0	0	0
lib230331_TACAACGTCTGAGGTT-1	0	0	0	0	0	0	0	0	0	0	0	0	0	0	0	0	0	0	0	0	0	0	0	0	0	0	0	0	0	0	0	0	0	0	0	0	0	0	0	0	0	0	0	0	0	0	0	0	0
lib230331_TACACCCAGATTGATG-1	0	0	0	0	0	0	0	0	0	0	0	0	0	0	0	0	0	0	0	0	0	0	0	0	0	0	0	0	0	0	0	0	0	0	0	0	0	0	0	0	0	0	0	0	0	0	0	0	0
lib230331_TACGGTAAGGCGCTCT-1	0	0	0	0	0	0	0	0	0	0	0	0	0	0	0	0	0	0	0	0	0	0	0	0	0	0	0	0	0	0	0	0	0	0	0	0	0	0	0	0	0	0	0	0	0	0	0	0	0
lib230331_TACTTACGTAGCGTTT-1	0	0	0	0	0	0	0	0	0	0	0	0	0	0	0	0	0	0	0	0	0	0	0	0	0	0	0	0	0	0	0	0	0	0	0	0	0	0	0	0	0	0	0	0	0	0	0	0	0
lib230331_TCACGCTAGGTTGACG-1	0	0	0	0	0	0	0	0	0	0	0	0	0	0	0	0	0	0	0	0	0	0	0	0	0	0	0	0	0	0	0	0	0	0	0	0	0	0	0	0	0	0	0	0	0	0	0	0	0
lib230331_TCATACTGTTTACGAC-1	0	0	0	0	0	0	0	0	0	0	0	0	0	0	0	0	0	0	0	0	0	0	0	0	0	0	0	0	0	0	0	0	0	0	0	0	0	0	0	0	0	0	0	0	0	0	0	0	0
lib230331_TCATATCTCTCCCAAC-1	0	0	0	0	0	0	0	0	0	0	0	0	0	0	0	0	0	0	0	0	0	0	0	0	0	0	0	0	0	0	0	0	0	0	0	0	0	0	0	0	0	0	0	0	0	0	0	0	0
lib230331_TCGACGGCATAGTCGT-1	0	0	0	0	0	0	0	0	0	0	0	0	0	0	0	0	0	0	0	0	0	0	0	0	0	0	0	0	0	0	0	0	0	0	0	0	0	0	0	0	0	0	0	0	0	0	0	0	0
lib230331_TCTAACTCAGTCACGC-1	0	0	0	0	0	0	0	0	0	0	0	0	0	0	0	0	0	0	0	0	0	0	0	0	0	0	0	0	0	0	0	0	0	0	0	0	0	0	0	0	0	0	0	0	0	0	0	0	0
lib230331_TGAACGTAGGTTGAGC-1	0	0	0	0	0	0	0	0	0	0	0	0	0	0	0	0	0	0	0	0	0	0	0	0	0	0	0	0	0	0	0	0	0	0	0	0	0	0	0	0	0	0	0	0	0	0	0	0	0
lib230331_TGGGAGATCGTGTCAA-1	0	0	0	0	0	0	0	0	0	0	0	0	0	0	0	0	0	0	0	0	0	0	0	0	0	0	0	0	0	0	0	0	0	0	0	0	0	0	0	0	0	0	0	0	0	0	0	0	0
lib230331_TGGGCTGAGCACTAGG-1	0	0	0	0	0	0	0	0	0	0	0	0	0	0	0	0	0	0	0	0	0	0	0	0	0	0	0	0	0	0	0	0	0	0	0	0	0	0	0	0	0	0	0	0	0	0	0	0	0
lib230331_TGGGCTGCACTGGCCA-1	0	0	0	0	0	0	0	0	0	0	0	0	0	0	0	0	0	0	0	0	0	0	0	0	0	0	0	0	0	0	0	0	0	0	0	0	0	0	0	0	0	0	0	0	0	0	0	0	0
lib230331_TGTGAGTCAGGAATCG-1	0	0	0	0	0	0	0	0	0	0	0	0	0	0	0	0	0	0	0	0	0	0	0	0	0	0	0	0	0	0	0	0	0	0	0	0	0	0	0	0	0	0	0	0	0	0	0	0	0
lib230331_TGTTCATGTTCCGTTC-1	0	0	0	0	0	0	0	0	0	0	0	0	0	0	0	0	0	0	0	0	0	0	0	0	0	0	0	0	0	0	0	0	0	0	0	0	0	0	0	0	0	0	0	0	0	0	0	0	0
lib230331_TTATTGCAGACGCCCT-1	0	0	0	0	0	0	0	0	0	0	0	0	0	0	0	0	0	0	0	0	0	0	0	0	0	0	0	0	0	0	0	0	0	0	0	0	0	0	0	0	0	0	0	0	0	0	0	0	0
lib230331_TTCCAATCAAGATGTA-1	0	0	0	0	0	0	0	0	0	0	0	0	0	0	0	0	0	0	0	0	0	0	0	0	0	0	0	0	0	0	0	0	0	0	0	0	0	0	0	0	0	0	0	0	0	0	0	0	0
lib230331_AAAGTGACATGGGAAC-1	0	0	0	0	0	0	0	0	0	0	0	0	0	0	0	0	0	0.146953	0	0	0	0.114943	0	0.234332	0	0	0	0	0	0	0	0.134868	0	0.263529	0	0	0	0	0	0	0	0	0	0	0	0	0	0	0
lib230331_AACAACCGTAATTGGA-1	0	0	0	0	0	0	0	0	0	0	0	0	0	0	0	0	0	0	0	0	0	0	0	0	0	0	0	0	0	0	0	0	0	0.284706	0	0	0	0	0	0	0	0	0	0	0	0	0	0	0
lib230331_AACACACCAGCTACCG-1	0	0.176871	0	0	0	0.340633	0	0	0	0	0	0	0	0	0	0	0	0	0	0.215909	0	0.172414	0	0.152589	0	0.373016	0	0	0	0	0	0.203947	0	0	0	0	0	0	0	0	0	0	0.176871	0	0.340633	0	0	0	0
lib230331_AACGAAAGTGGGCTCT-1	0	0	0	0	0	0	0	0	0	0	0	0	0	0	0	0	0	0.146953	0	0	0	0.114943	0	0.234332	0	0	0	0	0	0	0	0.134868	0	0.263529	0	0	0	0	0	0	0	0	0	0	0	0	0	0	0
lib230331_AAGACTCAGGTTCTCG-1	0	0	0	0	0	0	0	0	0	0	0	0	0	0	0	0	0	0.146953	0	0	0	0.114943	0	0.234332	0	0	0	0	0	0	0	0.134868	0	0.263529	0	0	0	0	0	0	0	0	0	0	0	0	0	0	0
lib230331_AAGACTCAGGTTCTTG-1	0	0	0	0	0	0	0	0	0	0	0	0	0	0	0	0	0	0	0	0	0	0	0	0	0	0	0	0	0	0	0	0	0	0.284706	0	0	0	0	0	0	0	0	0	0	0	0	0	0	0
lib230331_AAGATAGAGACTCTTG-1	0	0.029932	0	0	0	0	0	0	0	0	0	0	0	0	0	0.131148	0	0.0860215	0	0	0	0.142529	0	0.321526	0	0	0	0	0	0	0	0	0	0.258824	0	0	0	0	0	0	0	0	0.029932	0	0	0	0	0	0
lib230331_AAGTTCGCAGCAGTAG-1	0	0.176871	0	0	0	0.340633	0	0	0	0	0	0	0	0	0	0	0	0	0	0.215909	0	0.172414	0	0.152589	0	0.373016	0	0	0	0	0	0.203947	0	0	0	0	0	0	0	0	0	0	0.176871	0	0.340633	0	0	0	0
lib230331_AATGAAGAGTCCCAAT-1	0	0.176871	0	0	0	0.340633	0	0	0	0	0	0	0	0	0	0	0	0	0	0.215909	0	0.172414	0	0.152589	0	0.373016	0	0	0	0	0	0.203947	0	0	0	0	0	0	0	0	0	0	0.176871	0	0.340633	0	0	0	0
lib230331_ACAAGCTCAGGTGGAT-1	0	0.029932	0	0	0	0	0	0	0	0	0	0	0	0	0	0.131148	0	0.0860215	0	0	0	0.142529	0	0.321526	0	0	0	0	0	0	0	0	0	0.258824	0	0	0	0	0	0	0	0	0.029932	0	0	0	0	0	0
lib230331_ACACCAATCGGTGTTA-1	0	0	0	0	0	0	0	0	0	0	0	0	0	0	0	0	0	0	0	0	0	0	0	0	0	0	0	0	0	0	0	0	0	0.284706	0	0	0	0	0	0	0	0	0	0	0	0	0	0	0
lib230331_ACAGGGAGTGCGACAA-1	0	0	0	0	0	0	0	0	0	0	0	0	0	0	0	0	0	0	0	0	0	0	0	0	0	0	0	0	0	0	0	0	0	0.284706	0	0	0	0	0	0	0	0	0	0	0	0	0	0	0
lib230331_ACATCCCAGGCTATCT-1	0	0	0	0	0	0	0	0	0	0	0	0	0	0	0	0	0	0.146953	0	0	0	0.114943	0	0.234332	0	0	0	0	0	0	0	0.134868	0	0.263529	0	0	0	0	0	0	0	0	0	0	0	0	0	0	0
lib230331_ACATCCCAGTTGGACG-1	0	0	0	0	0	0	0	0	0	0	0	0	0	0	0	0	0	0	0	0	0	0	0	0	0	0	0	0	0	0	0	0	0	0.284706	0	0	0	0	0	0	0	0	0	0	0	0	0	0	0
lib230331_ACATGCAAGACGACGT-1	0	0.029932	0	0	0	0	0	0	0	0	0	0	0	0	0	0.131148	0	0.0860215	0	0	0	0.142529	0	0.321526	0	0	0	0	0	0	0	0	0	0.258824	0	0	0	0	0	0	0	0	0.029932	0	0	0	0	0	0
lib230331_ACCATTTTCCGTGGTG-1	0	0	0	0	0	0	0	0	0	0	0	0	0	0	0	0	0	0	0	0	0	0	0	0	0	0	0	0	0	0	0	0	0	0.284706	0	0	0	0	0	0	0	0	0	0	0	0	0	0	0
lib230331_ACCCTTGCAGAGTCAG-1	0	0.029932	0	0	0	0	0	0	0	0	0	0	0	0	0	0.131148	0	0.0860215	0	0	0	0.142529	0	0.321526	0	0	0	0	0	0	0	0	0	0.258824	0	0	0	0	0	0	0	0	0.029932	0	0	0	0	0	0
lib230331_ACCTACCGTTCGTACA-1	0	0.176871	0	0	0	0.340633	0	0	0	0	0	0	0	0	0	0	0	0	0	0.215909	0	0.172414	0	0.152589	0	0.373016	0	0	0	0	0	0.203947	0	0	0	0	0	0	0	0	0	0	0.176871	0	0.340633	0	0	0	0
lib230331_ACCTACCTCATGCCGG-1	0	0	0	0	0	0	0	0	0	0	0	0	0	0	0	0	0	0.146953	0	0	0	0.114943	0	0.234332	0	0	0	0	0	0	0	0.134868	0	0.263529	0	0	0	0	0	0	0	0	0	0	0	0	0	0	0
lib230331_ACGCACGCAAACGGCA-1	0	0	0	0	0	0	0	0	0	0	0	0	0	0	0	0	0	0	0	0	0	0	0	0	0	0	0	0	0	0	0	0	0	0.284706	0	0	0	0	0	0	0	0	0	0	0	0	0	0	0
lib230331_ACGGTTAAGGTAAAGG-1	0	0.176871	0	0	0	0.340633	0	0	0	0	0	0	0	0	0	0	0	0	0	0.215909	0	0.172414	0	0.152589	0	0.373016	0	0	0	0	0	0.203947	0	0	0	0	0	0	0	0	0	0	0.176871	0	0.340633	0	0	0	0
lib230331_ACGTAACGTGACACAG-1	0	0.176871	0	0	0	0.340633	0	0	0	0	0	0	0	0	0	0	0	0	0	0.215909	0	0.172414	0	0.152589	0	0.373016	0	0	0	0	0	0.203947	0	0	0	0	0	0	0	0	0	0	0.176871	0	0.340633	0	0	0	0
lib230331_ACGTTCCGTTACGGAG-1	0	0	0	0	0	0	0	0	0	0	0	0	0	0	0	0	0	0.146953	0	0	0	0.114943	0	0.234332	0	0	0	0	0	0	0	0.134868	0	0.263529	0	0	0	0	0	0	0	0	0	0	0	0	0	0	0
lib230331_ACTGATGGTCACTTAG-1	0	0.176871	0	0	0	0.340633	0	0	0	0	0	0	0	0	0	0	0	0	0	0.215909	0	0.172414	0	0.152589	0	0.373016	0	0	0	0	0	0.203947	0	0	0	0	0	0	0	0	0	0	0.176871	0	0.340633	0	0	0	0
lib230331_ACTGCAAGTGGCCACT-1	0	0	0	0	0	0	0	0	0	0	0	0	0	0	0	0	0	0.146953	0	0	0	0.114943	0	0.234332	0	0	0	0	0	0	0	0.134868	0	0.263529	0	0	0	0	0	0	0	0	0	0	0	0	0	0	0
lib230331_ACTGTGAGTTTCTTAC-1	0	0	0	0	0	0	0	0	0	0	0	0	0	0	0	0	0	0.146953	0	0	0	0.114943	0	0.234332	0	0	0	0	0	0	0	0.134868	0	0.263529	0	0	0	0	0	0	0	0	0	0	0	0	0	0	0
lib230331_ACTTCCGCAAAGGCTG-1	0	0.176871	0	0	0	0.340633	0	0	0	0	0	0	0	0	0	0	0	0	0	0.215909	0	0.172414	0	0.152589	0	0.373016	0	0	0	0	0	0.203947	0	0	0	0	0	0	0	0	0	0	0.176871	0	0.340633	0	0	0	0
lib230331_ACTTCGCGTAATCAAG-1	0	0.176871	0	0	0	0.340633	0	0	0	0	0	0	0	0	0	0	0	0	0	0.215909	0	0.172414	0	0.152589	0	0.373016	0	0	0	0	0	0.203947	0	0	0	0	0	0	0	0	0	0	0.176871	0	0.340633	0	0	0	0
lib230331_AGAACAACATTATGCG-1	0	0	0	0	0	0	0	0	0	0	0	0	0	0	0	0	0	0.146953	0	0	0	0.114943	0	0.234332	0	0	0	0	0	0	0	0.134868	0	0.263529	0	0	0	0	0	0	0	0	0	0	0	0	0	0	0
lib230331_AGACCATCAGACGATG-1	0	0	0	0	0	0	0	0	0	0	0	0	0	0	0	0	0	0.146953	0	0	0	0.114943	0	0.234332	0	0	0	0	0	0	0	0.134868	0	0.263529	0	0	0	0	0	0	0	0	0	0	0	0	0	0	0
lib230331_AGACTCAGTAGTGTGG-1	0	0	0	0	0	0	0	0	0	0	0	0	0	0	0	0	0	0.146953	0	0	0	0.114943	0	0.234332	0	0	0	0	0	0	0	0.134868	0	0.263529	0	0	0	0	0	0	0	0	0	0	0	0	0	0	0
lib230331_AGAGAGCCACCCTAGG-1	0	0	0	0	0	0	0	0	0	0	0	0	0	0	0	0	0	0.146953	0	0	0	0.114943	0	0.234332	0	0	0	0	0	0	0	0.134868	0	0.263529	0	0	0	0	0	0	0	0	0	0	0	0	0	0	0
lib230331_AGATCCAGTAATGTGA-1	0	0	0	0	0	0	0	0	0	0	0	0	0	0	0	0	0	0	0	0	0	0	0	0	0	0	0	0	0	0	0	0	0	0.284706	0	0	0	0	0	0	0	0	0	0	0	0	0	0	0
lib230331_AGATCGTAGTACAACA-1	0	0	0	0	0	0	0	0	0	0	0	0	0	0	0	0	0	0.146953	0	0	0	0.114943	0	0.234332	0	0	0	0	0	0	0	0.134868	0	0.263529	0	0	0	0	0	0	0	0	0	0	0	0	0	0	0
lib230331_AGCATCAAGCACGTCC-1	0	0.029932	0	0	0	0	0	0	0	0	0	0	0	0	0	0.131148	0	0.0860215	0	0	0	0.142529	0	0.321526	0	0	0	0	0	0	0	0	0	0.258824	0	0	0	0	0	0	0	0	0.029932	0	0	0	0	0	0
lib230331_AGCGCTGGTTAGAAAC-1	0	0	0	0	0	0	0	0	0	0	0	0	0	0	0	0	0	0.146953	0	0	0	0.114943	0	0.234332	0	0	0	0	0	0	0	0.134868	0	0.263529	0	0	0	0	0	0	0	0	0	0	0	0	0	0	0
lib230331_AGCGCTGTCTCTATAC-1	0	0.029932	0	0	0	0	0	0	0	0	0	0	0	0	0	0.131148	0	0.0860215	0	0	0	0.142529	0	0.321526	0	0	0	0	0	0	0	0	0	0.258824	0	0	0	0	0	0	0	0	0.029932	0	0	0	0	0	0
lib230331_AGGAATAGTCCTCCTA-1	0	0.029932	0	0	0	0	0	0	0	0	0	0	0	0	0	0.131148	0	0.0860215	0	0	0	0.142529	0	0.321526	0	0	0	0	0	0	0	0	0	0.258824	0	0	0	0	0	0	0	0	0.029932	0	0	0	0	0	0
lib230331_AGGAGGTGTGCCTTCT-1	0	0.029932	0	0	0	0	0	0	0	0	0	0	0	0	0	0.131148	0	0.0860215	0	0	0	0.142529	0	0.321526	0	0	0	0	0	0	0	0	0	0.258824	0	0	0	0	0	0	0	0	0.029932	0	0	0	0	0	0
lib230331_AGGATAATCAAGTCTG-1	0	0.176871	0	0	0	0.340633	0	0	0	0	0	0	0	0	0	0	0	0	0	0.215909	0	0.172414	0	0.152589	0	0.373016	0	0	0	0	0	0.203947	0	0	0	0	0	0	0	0	0	0	0.176871	0	0.340633	0	0	0	0
lib230331_AGGGAGTTCAAGTCTG-1	0	0	0	0	0	0	0	0	0	0	0	0	0	0	0	0	0	0	0	0	0	0	0	0	0	0	0	0	0	0	0	0	0	0.284706	0	0	0	0	0	0	0	0	0	0	0	0	0	0	0
lib230331_AGGGCTCGTTAAGACA-1	0	0	0	0	0	0	0	0	0	0	0	0	0	0	0	0	0	0	0	0	0	0	0	0	0	0	0	0	0	0	0	0	0	0.284706	0	0	0	0	0	0	0	0	0	0	0	0	0	0	0
lib230331_AGGGTGAAGTTGCGCC-1	0	0.029932	0	0	0	0	0	0	0	0	0	0	0	0	0	0.131148	0	0.0860215	0	0	0	0.142529	0	0.321526	0	0	0	0	0	0	0	0	0	0.258824	0	0	0	0	0	0	0	0	0.029932	0	0	0	0	0	0
lib230331_AGGGTTTCATGCCATA-1	0	0	0	0	0	0	0	0	0	0	0	0.184697	0	0	0	0.135246	0	0	0	0	0	0	0	0.20436	0	0	0	0	0	0	0	0.726974	0	0.157647	0	0	0	0	0	0	0	0	0	0	0	0	0	0.184697	0
lib230331_AGGTAGGTCAAGTAAG-1	0	0.176871	0	0	0	0.340633	0	0	0	0	0	0	0	0	0	0	0	0	0	0.215909	0	0.172414	0	0.152589	0	0.373016	0	0	0	0	0	0.203947	0	0	0	0	0	0	0	0	0	0	0.176871	0	0.340633	0	0	0	0
lib230331_AGGTTACGTACCCGAC-1	0	0.176871	0	0	0	0.340633	0	0	0	0	0	0	0	0	0	0	0	0	0	0.215909	0	0.172414	0	0.152589	0	0.373016	0	0	0	0	0	0.203947	0	0	0	0	0	0	0	0	0	0	0.176871	0	0.340633	0	0	0	0
lib230331_AGTAGTCGTAGGAAAG-1	0	0	0	0	0	0	0	0	0	0	0	0	0	0	0	0	0	0.146953	0	0	0	0.114943	0	0.234332	0	0	0	0	0	0	0	0.134868	0	0.263529	0	0	0	0	0	0	0	0	0	0	0	0	0	0	0
lib230331_AGTGCCGTCTAAGCCA-1	0	0.176871	0	0	0	0.340633	0	0	0	0	0	0	0	0	0	0	0	0	0	0.215909	0	0.172414	0	0.152589	0	0.373016	0	0	0	0	0	0.203947	0	0	0	0	0	0	0	0	0	0	0.176871	0	0.340633	0	0	0	0
lib230331_AGTGTTGCACCCTTAC-1	0	0	0	0	0	0	0	0	0	0	0	0	0	0	0	0	0	0	0	0	0	0	0	0	0	0	0	0	0	0	0	0	0	0.284706	0	0	0	0	0	0	0	0	0	0	0	0	0	0	0
lib230331_ATACCTTCACTCATAG-1	0	0.029932	0	0	0	0	0	0	0	0	0	0	0	0	0	0.131148	0	0.0860215	0	0	0	0.142529	0	0.321526	0	0	0	0	0	0	0	0	0	0.258824	0	0	0	0	0	0	0	0	0.029932	0	0	0	0	0	0
lib230331_ATACTTCCACAGCTGC-1	0	0.029932	0	0	0	0	0	0	0	0	0	0	0	0	0	0.131148	0	0.0860215	0	0	0	0.142529	0	0.321526	0	0	0	0	0	0	0	0	0	0.258824	0	0	0	0	0	0	0	0	0.029932	0	0	0	0	0	0
lib230331_ATAGACCAGAGTCTGG-1	0	0.029932	0	0	0	0	0	0	0	0	0	0	0	0	0	0.131148	0	0.0860215	0	0	0	0.142529	0	0.321526	0	0	0	0	0	0	0	0	0	0.258824	0	0	0	0	0	0	0	0	0.029932	0	0	0	0	0	0
lib230331_ATAGAGAGTGTGTCCG-1	0	0.029932	0	0	0	0	0	0	0	0	0	0	0	0	0	0.131148	0	0.0860215	0	0	0	0.142529	0	0.321526	0	0	0	0	0	0	0	0	0	0.258824	0	0	0	0	0	0	0	0	0.029932	0	0	0	0	0	0
lib230331_ATATCCTAGTTCTACG-1	0	0	0	0	0	0	0	0	0	0	0	0.184697	0	0	0	0.135246	0	0	0	0	0	0	0	0.20436	0	0	0	0	0	0	0	0.726974	0	0.157647	0	0	0	0	0	0	0	0	0	0	0	0	0	0.184697	0
lib230331_ATCACGATCATTCGTT-1	0	0.029932	0	0	0	0	0	0	0	0	0	0	0	0	0	0.131148	0	0.0860215	0	0	0	0.142529	0	0.321526	0	0	0	0	0	0	0	0	0	0.258824	0	0	0	0	0	0	0	0	0.029932	0	0	0	0	0	0
lib230331_ATCGATGGTGTGCTTA-1	0	0	0	0	0	0	0	0	0	0	0	0	0	0	0	0	0	0.146953	0	0	0	0.114943	0	0.234332	0	0	0	0	0	0	0	0.134868	0	0.263529	0	0	0	0	0	0	0	0	0	0	0	0	0	0	0
lib230331_ATCGCCTCAAGGCAAC-1	0	0	0	0	0	0	0	0	0	0	0	0	0	0	0	0	0	0	0	0	0	0	0	0	0	0	0	0	0	0	0	0	0	0.284706	0	0	0	0	0	0	0	0	0	0	0	0	0	0	0
lib230331_ATCGCCTCAGTGGCTC-1	0	0.029932	0	0	0	0	0	0	0	0	0	0	0	0	0	0.131148	0	0.0860215	0	0	0	0.142529	0	0.321526	0	0	0	0	0	0	0	0	0	0.258824	0	0	0	0	0	0	0	0	0.029932	0	0	0	0	0	0
lib230331_ATCGGATCAGTGCCTG-1	0	0	0	0	0	0	0	0	0	0	0	0	0	0	0	0	0	0	0	0	0	0	0	0	0	0	0	0	0	0	0	0	0	0.284706	0	0	0	0	0	0	0	0	0	0	0	0	0	0	0
lib230331_ATCGTAGAGTCGCCCA-1	0	0	0	0	0	0	0	0	0	0	0	0	0	0	0	0	0	0	0	0	0	0	0	0	0	0	0	0	0	0	0	0	0	0.284706	0	0	0	0	0	0	0	0	0	0	0	0	0	0	0
lib230331_ATCGTCCAGGCTCCCA-1	0	0	0	0	0	0	0	0	0	0	0	0	0	0	0	0	0	0.146953	0	0	0	0.114943	0	0.234332	0	0	0	0	0	0	0	0.134868	0	0.263529	0	0	0	0	0	0	0	0	0	0	0	0	0	0	0
lib230331_ATCGTGACAGAGAAAG-1	0	0	0	0	0	0	0	0	0	0	0	0	0	0	0	0	0	0.146953	0	0	0	0.114943	0	0.234332	0	0	0	0	0	0	0	0.134868	0	0.263529	0	0	0	0	0	0	0	0	0	0	0	0	0	0	0
lib230331_ATCTTCAGTGAGGCAT-1	0	0	0	0	0	0	0	0	0	0	0	0	0	0	0	0	0	0	0	0	0	0	0	0	0	0	0	0	0	0	0	0	0	0.284706	0	0	0	0	0	0	0	0	0	0	0	0	0	0	0
lib230331_ATGACCACATGGCCAC-1	0	0.029932	0	0	0	0	0	0	0	0	0	0	0	0	0	0.131148	0	0.0860215	0	0	0	0.142529	0	0.321526	0	0	0	0	0	0	0	0	0	0.258824	0	0	0	0	0	0	0	0	0.029932	0	0	0	0	0	0
lib230331_ATGCGATGTTCTAACG-1	0	0	0	0	0	0	0	0	0	0	0	0	0	0	0	0	0	0	0	0	0	0	0	0	0	0	0	0	0	0	0	0	0	0.284706	0	0	0	0	0	0	0	0	0	0	0	0	0	0	0
lib230331_ATGGGAGGTTCGGCCA-1	0	0	0	0	0	0	0	0	0	0	0	0	0	0	0	0	0	0.146953	0	0	0	0.114943	0	0.234332	0	0	0	0	0	0	0	0.134868	0	0.263529	0	0	0	0	0	0	0	0	0	0	0	0	0	0	0
lib230331_ATTATCCAGTGATAAC-1	0	0.029932	0	0	0	0	0	0	0	0	0	0	0	0	0	0.131148	0	0.0860215	0	0	0	0.142529	0	0.321526	0	0	0	0	0	0	0	0	0	0.258824	0	0	0	0	0	0	0	0	0.029932	0	0	0	0	0	0
lib230331_ATTCCATGTTGCTCGG-1	0	0.176871	0	0	0	0.340633	0	0	0	0	0	0	0	0	0	0	0	0	0	0.215909	0	0.172414	0	0.152589	0	0.373016	0	0	0	0	0	0.203947	0	0	0	0	0	0	0	0	0	0	0.176871	0	0.340633	0	0	0	0
lib230331_ATTCTTGCAACTTCTT-1	0	0	0	0	0	0	0	0	0	0	0	0	0	0	0	0	0	0	0	0	0	0	0	0	0	0	0	0	0	0	0	0	0	0.284706	0	0	0	0	0	0	0	0	0	0	0	0	0	0	0
lib230331_ATTTACCGTGCATCTA-1	0	0.029932	0	0	0	0	0	0	0	0	0	0	0	0	0	0.131148	0	0.0860215	0	0	0	0.142529	0	0.321526	0	0	0	0	0	0	0	0	0	0.258824	0	0	0	0	0	0	0	0	0.029932	0	0	0	0	0	0
lib230331_CAAGAGGTCAACACGT-1	0	0.176871	0	0	0	0.340633	0	0	0	0	0	0	0	0	0	0	0	0	0	0.215909	0	0.172414	0	0.152589	0	0.373016	0	0	0	0	0	0.203947	0	0	0	0	0	0	0	0	0	0	0.176871	0	0.340633	0	0	0	0
lib230331_CAAGCTAGTAATGATG-1	0	0.029932	0	0	0	0	0	0	0	0	0	0	0	0	0	0.131148	0	0.0860215	0	0	0	0.142529	0	0.321526	0	0	0	0	0	0	0	0	0	0.258824	0	0	0	0	0	0	0	0	0.029932	0	0	0	0	0	0
lib230331_CAATTTCCATAACAGA-1	0	0	0	0	0	0	0	0	0	0	0	0	0	0	0	0	0	0	0	0	0	0	0	0	0	0	0	0	0	0	0	0	0	0.284706	0	0	0	0	0	0	0	0	0	0	0	0	0	0	0
lib230331_CACAGATAGAGGGCGA-1	0	0.029932	0	0	0	0	0	0	0	0	0	0	0	0	0	0.131148	0	0.0860215	0	0	0	0.142529	0	0.321526	0	0	0	0	0	0	0	0	0	0.258824	0	0	0	0	0	0	0	0	0.029932	0	0	0	0	0	0
lib230331_CACAGATTCCACTTCG-1	0	0	0	0	0	0	0	0	0	0	0	0	0	0	0	0	0	0.146953	0	0	0	0.114943	0	0.234332	0	0	0	0	0	0	0	0.134868	0	0.263529	0	0	0	0	0	0	0	0	0	0	0	0	0	0	0
lib230331_CACAGATTCCTTACCG-1	0	0	0	0	0	0	0	0	0	0	0	0	0	0	0	0	0	0.146953	0	0	0	0.114943	0	0.234332	0	0	0	0	0	0	0	0.134868	0	0.263529	0	0	0	0	0	0	0	0	0	0	0	0	0	0	0
lib230331_CACAGGCAGCCACAAG-1	0	0	0	0	0	0	0	0	0	0	0	0	0	0	0	0	0	0.146953	0	0	0	0.114943	0	0.234332	0	0	0	0	0	0	0	0.134868	0	0.263529	0	0	0	0	0	0	0	0	0	0	0	0	0	0	0
lib230331_CACAGGCTCAGCTGTA-1	0	0	0	0	0	0	0	0	0	0	0	0	0	0	0	0	0	0.146953	0	0	0	0.114943	0	0.234332	0	0	0	0	0	0	0	0.134868	0	0.263529	0	0	0	0	0	0	0	0	0	0	0	0	0	0	0
lib230331_CACGGGTAGCACCGTC-1	0	0	0	0	0	0	0	0	0	0	0	0	0	0	0	0	0	0.146953	0	0	0	0.114943	0	0.234332	0	0	0	0	0	0	0	0.134868	0	0.263529	0	0	0	0	0	0	0	0	0	0	0	0	0	0	0
lib230331_CACGGGTCACATGTTG-1	0	0.029932	0	0	0	0	0	0	0	0	0	0	0	0	0	0.131148	0	0.0860215	0	0	0	0.142529	0	0.321526	0	0	0	0	0	0	0	0	0	0.258824	0	0	0	0	0	0	0	0	0.029932	0	0	0	0	0	0
lib230331_CAGATACTCACGAGGA-1	0	0	0	0	0	0	0	0	0	0	0	0	0	0	0	0	0	0	0	0	0	0	0	0	0	0	0	0	0	0	0	0	0	0.284706	0	0	0	0	0	0	0	0	0	0	0	0	0	0	0
lib230331_CAGATTGGTCATCAGT-1	0	0	0	0	0	0	0	0	0	0	0	0	0	0	0	0	0	0.146953	0	0	0	0.114943	0	0.234332	0	0	0	0	0	0	0	0.134868	0	0.263529	0	0	0	0	0	0	0	0	0	0	0	0	0	0	0
lib230331_CAGGCCACATGCTGCG-1	0	0.176871	0	0	0	0.340633	0	0	0	0	0	0	0	0	0	0	0	0	0	0.215909	0	0.172414	0	0.152589	0	0.373016	0	0	0	0	0	0.203947	0	0	0	0	0	0	0	0	0	0	0.176871	0	0.340633	0	0	0	0
lib230331_CAGGTATCATAGTCAC-1	0	0	0	0	0	0	0	0	0	0	0	0.184697	0	0	0	0.135246	0	0	0	0	0	0	0	0.20436	0	0	0	0	0	0	0	0.726974	0	0.157647	0	0	0	0	0	0	0	0	0	0	0	0	0	0.184697	0
lib230331_CATACAGTCAGCTTCC-1	0	0	0	0	0	0	0	0	0	0	0	0	0	0	0	0	0	0	0	0	0	0	0	0	0	0	0	0	0	0	0	0	0	0.284706	0	0	0	0	0	0	0	0	0	0	0	0	0	0	0
lib230331_CATAGACCAGACCTAT-1	0	0	0	0	0	0	0	0	0	0	0	0	0	0	0	0	0	0.146953	0	0	0	0.114943	0	0.234332	0	0	0	0	0	0	0	0.134868	0	0.263529	0	0	0	0	0	0	0	0	0	0	0	0	0	0	0
lib230331_CATCCACCACCACTGG-1	0	0.029932	0	0	0	0	0	0	0	0	0	0	0	0	0	0.131148	0	0.0860215	0	0	0	0.142529	0	0.321526	0	0	0	0	0	0	0	0	0	0.258824	0	0	0	0	0	0	0	0	0.029932	0	0	0	0	0	0
lib230331_CATCCACCACCAGGTC-1	0	0	0	0	0	0	0	0	0	0	0	0	0	0	0	0	0	0	0	0	0	0	0	0	0	0	0	0	0	0	0	0	0	0.284706	0	0	0	0	0	0	0	0	0	0	0	0	0	0	0
lib230331_CATCCACGTGGTCCCA-1	0	0	0	0	0	0	0	0	0	0	0	0	0	0	0	0	0	0	0	0	0	0	0	0	0	0	0	0	0	0	0	0	0	0.284706	0	0	0	0	0	0	0	0	0	0	0	0	0	0	0
lib230331_CATCGGGAGCGGATCA-1	0	0.029932	0	0	0	0	0	0	0	0	0	0	0	0	0	0.131148	0	0.0860215	0	0	0	0.142529	0	0.321526	0	0	0	0	0	0	0	0	0	0.258824	0	0	0	0	0	0	0	0	0.029932	0	0	0	0	0	0
lib230331_CATCGTCCAACCGTGC-1	0	0.176871	0	0	0	0.340633	0	0	0	0	0	0	0	0	0	0	0	0	0	0.215909	0	0.172414	0	0.152589	0	0.373016	0	0	0	0	0	0.203947	0	0	0	0	0	0	0	0	0	0	0.176871	0	0.340633	0	0	0	0
lib230331_CATGAGTAGGCTGGAT-1	0	0.029932	0	0	0	0	0	0	0	0	0	0	0	0	0	0.131148	0	0.0860215	0	0	0	0.142529	0	0.321526	0	0	0	0	0	0	0	0	0	0.258824	0	0	0	0	0	0	0	0	0.029932	0	0	0	0	0	0
lib230331_CATGCAACACCGTGCA-1	0	0.029932	0	0	0	0	0	0	0	0	0	0	0	0	0	0.131148	0	0.0860215	0	0	0	0.142529	0	0.321526	0	0	0	0	0	0	0	0	0	0.258824	0	0	0	0	0	0	0	0	0.029932	0	0	0	0	0	0
lib230331_CATGCGGCATCCGTGG-1	0	0.029932	0	0	0	0	0	0	0	0	0	0	0	0	0	0.131148	0	0.0860215	0	0	0	0.142529	0	0.321526	0	0	0	0	0	0	0	0	0	0.258824	0	0	0	0	0	0	0	0	0.029932	0	0	0	0	0	0
lib230331_CATTCCGGTCGAGTGA-1	0	0.029932	0	0	0	0	0	0	0	0	0	0	0	0	0	0.131148	0	0.0860215	0	0	0	0.142529	0	0.321526	0	0	0	0	0	0	0	0	0	0.258824	0	0	0	0	0	0	0	0	0.029932	0	0	0	0	0	0
lib230331_CCAATGAGTTGTGGCC-1	0	0	0	0	0	0	0	0	0	0	0	0.184697	0	0	0	0.135246	0	0	0	0	0	0	0	0.20436	0	0	0	0	0	0	0	0.726974	0	0.157647	0	0	0	0	0	0	0	0	0	0	0	0	0	0.184697	0
lib230331_CCACCATAGATGAACT-1	0	0.176871	0	0	0	0.340633	0	0	0	0	0	0	0	0	0	0	0	0	0	0.215909	0	0.172414	0	0.152589	0	0.373016	0	0	0	0	0	0.203947	0	0	0	0	0	0	0	0	0	0	0.176871	0	0.340633	0	0	0	0
lib230331_CCATCACTCATTTACC-1	0	0.029932	0	0	0	0	0	0	0	0	0	0	0	0	0	0.131148	0	0.0860215	0	0	0	0.142529	0	0.321526	0	0	0	0	0	0	0	0	0	0.258824	0	0	0	0	0	0	0	0	0.029932	0	0	0	0	0	0
lib230331_CCCGAAGCAAGGCAAC-1	0	0.176871	0	0	0	0.340633	0	0	0	0	0	0	0	0	0	0	0	0	0	0.215909	0	0.172414	0	0.152589	0	0.373016	0	0	0	0	0	0.203947	0	0	0	0	0	0	0	0	0	0	0.176871	0	0.340633	0	0	0	0
lib230331_CCCGAAGTCCAGCCTT-1	0	0	0	0	0	0	0	0	0	0	0	0	0	0	0	0	0	0.146953	0	0	0	0.114943	0	0.234332	0	0	0	0	0	0	0	0.134868	0	0.263529	0	0	0	0	0	0	0	0	0	0	0	0	0	0	0
lib230331_CCCTAACTCATTGTGG-1	0	0.029932	0	0	0	0	0	0	0	0	0	0	0	0	0	0.131148	0	0.0860215	0	0	0	0.142529	0	0.321526	0	0	0	0	0	0	0	0	0	0.258824	0	0	0	0	0	0	0	0	0.029932	0	0	0	0	0	0
lib230331_CCGTTCAGTCCTATAG-1	0	0	0	0	0	0	0	0	0	0	0	0	0	0	0	0	0	0	0	0	0	0	0	0	0	0	0	0	0	0	0	0	0	0.284706	0	0	0	0	0	0	0	0	0	0	0	0	0	0	0
lib230331_CCTACGTAGGATGTTA-1	0	0	0	0	0	0	0	0	0	0	0	0	0	0	0	0	0	0.146953	0	0	0	0.114943	0	0.234332	0	0	0	0	0	0	0	0.134868	0	0.263529	0	0	0	0	0	0	0	0	0	0	0	0	0	0	0
lib230331_CCTATCGAGTTGGACG-1	0	0	0	0	0	0	0	0	0	0	0	0	0	0	0	0	0	0	0	0	0	0	0	0	0	0	0	0	0	0	0	0	0	0.284706	0	0	0	0	0	0	0	0	0	0	0	0	0	0	0
lib230331_CCTCAACCAGGTTCAT-1	0	0.029932	0	0	0	0	0	0	0	0	0	0	0	0	0	0.131148	0	0.0860215	0	0	0	0.142529	0	0.321526	0	0	0	0	0	0	0	0	0	0.258824	0	0	0	0	0	0	0	0	0.029932	0	0	0	0	0	0
lib230331_CCTCTAGGTGGTGATG-1	0	0	0	0	0	0	0	0	0	0	0	0	0	0	0	0	0	0	0	0	0	0	0	0	0	0	0	0	0	0	0	0	0	0.284706	0	0	0	0	0	0	0	0	0	0	0	0	0	0	0
lib230331_CCTCTAGTCTTACGTT-1	0	0.029932	0	0	0	0	0	0	0	0	0	0	0	0	0	0.131148	0	0.0860215	0	0	0	0.142529	0	0.321526	0	0	0	0	0	0	0	0	0	0.258824	0	0	0	0	0	0	0	0	0.029932	0	0	0	0	0	0
lib230331_CCTGTTGCAGATTAAG-1	0	0	0	0	0	0	0	0	0	0	0	0.184697	0	0	0	0.135246	0	0	0	0	0	0	0	0.20436	0	0	0	0	0	0	0	0.726974	0	0.157647	0	0	0	0	0	0	0	0	0	0	0	0	0	0.184697	0
lib230331_CGAAGTTCATTCTCCG-1	0	0.029932	0	0	0	0	0	0	0	0	0	0	0	0	0	0.131148	0	0.0860215	0	0	0	0.142529	0	0.321526	0	0	0	0	0	0	0	0	0	0.258824	0	0	0	0	0	0	0	0	0.029932	0	0	0	0	0	0
lib230331_CGAGAAGTCCATCCGT-1	0	0	0	0	0	0	0	0	0	0	0	0	0	0	0	0	0	0.146953	0	0	0	0.114943	0	0.234332	0	0	0	0	0	0	0	0.134868	0	0.263529	0	0	0	0	0	0	0	0	0	0	0	0	0	0	0
lib230331_CGATGCGAGTGGATTA-1	0	0	0	0	0	0	0	0	0	0	0	0	0	0	0	0	0	0	0	0	0	0	0	0	0	0	0	0	0	0	0	0	0	0.284706	0	0	0	0	0	0	0	0	0	0	0	0	0	0	0
lib230331_CGCATAAAGGCCTTCG-1	0	0.029932	0	0	0	0	0	0	0	0	0	0	0	0	0	0.131148	0	0.0860215	0	0	0	0.142529	0	0.321526	0	0	0	0	0	0	0	0	0	0.258824	0	0	0	0	0	0	0	0	0.029932	0	0	0	0	0	0
lib230331_CGCATAAGTGGCTGCT-1	0	0.029932	0	0	0	0	0	0	0	0	0	0	0	0	0	0.131148	0	0.0860215	0	0	0	0.142529	0	0.321526	0	0	0	0	0	0	0	0	0	0.258824	0	0	0	0	0	0	0	0	0.029932	0	0	0	0	0	0
lib230331_CGCGTGAAGCACCGAA-1	0	0	0	0	0	0	0	0	0	0	0	0.184697	0	0	0	0.135246	0	0	0	0	0	0	0	0.20436	0	0	0	0	0	0	0	0.726974	0	0.157647	0	0	0	0	0	0	0	0	0	0	0	0	0	0.184697	0
lib230331_CGGACACAGCATCAAA-1	0	0	0	0	0	0	0	0	0	0	0	0	0	0	0	0	0	0	0	0	0	0	0	0	0	0	0	0	0	0	0	0	0	0.284706	0	0	0	0	0	0	0	0	0	0	0	0	0	0	0
lib230331_CGGAGAATCGGAGCAA-1	0	0.029932	0	0	0	0	0	0	0	0	0	0	0	0	0	0.131148	0	0.0860215	0	0	0	0.142529	0	0.321526	0	0	0	0	0	0	0	0	0	0.258824	0	0	0	0	0	0	0	0	0.029932	0	0	0	0	0	0
lib230331_CGTCAAAAGTACTGTC-1	0	0	0	0	0	0	0	0	0	0	0	0	0	0	0	0	0	0	0	0	0	0	0	0	0	0	0	0	0	0	0	0	0	0.284706	0	0	0	0	0	0	0	0	0	0	0	0	0	0	0
lib230331_CGTGTCTGTTACGCCG-1	0	0.176871	0	0	0	0.340633	0	0	0	0	0	0	0	0	0	0	0	0	0	0.215909	0	0.172414	0	0.152589	0	0.373016	0	0	0	0	0	0.203947	0	0	0	0	0	0	0	0	0	0	0.176871	0	0.340633	0	0	0	0
lib230331_CTAACTTCAGCTTTCC-1	0	0	0	0	0	0	0	0	0	0	0	0.184697	0	0	0	0.135246	0	0	0	0	0	0	0	0.20436	0	0	0	0	0	0	0	0.726974	0	0.157647	0	0	0	0	0	0	0	0	0	0	0	0	0	0.184697	0
lib230331_CTAGACAGTGCCTAAT-1	0	0.029932	0	0	0	0	0	0	0	0	0	0	0	0	0	0.131148	0	0.0860215	0	0	0	0.142529	0	0.321526	0	0	0	0	0	0	0	0	0	0.258824	0	0	0	0	0	0	0	0	0.029932	0	0	0	0	0	0
lib230331_CTATCTACACAGCCAC-1	0	0.176871	0	0	0	0.340633	0	0	0	0	0	0	0	0	0	0	0	0	0	0.215909	0	0.172414	0	0.152589	0	0.373016	0	0	0	0	0	0.203947	0	0	0	0	0	0	0	0	0	0	0.176871	0	0.340633	0	0	0	0
lib230331_CTCACTGAGAGTCTGG-1	0	0.029932	0	0	0	0	0	0	0	0	0	0	0	0	0	0.131148	0	0.0860215	0	0	0	0.142529	0	0.321526	0	0	0	0	0	0	0	0	0	0.258824	0	0	0	0	0	0	0	0	0.029932	0	0	0	0	0	0
lib230331_CTCAGGGTCGTCACCT-1	0	0.029932	0	0	0	0	0	0	0	0	0	0	0	0	0	0.131148	0	0.0860215	0	0	0	0.142529	0	0.321526	0	0	0	0	0	0	0	0	0	0.258824	0	0	0	0	0	0	0	0	0.029932	0	0	0	0	0	0
lib230331_CTCATGCTCGAAGTGG-1	0	0	0	0	0	0	0	0	0	0	0	0	0	0	0	0	0	0	0	0	0	0	0	0	0	0	0	0	0	0	0	0	0	0.284706	0	0	0	0	0	0	0	0	0	0	0	0	0	0	0
lib230331_CTCCATGAGTGGCAGT-1	0	0	0	0	0	0	0	0	0	0	0	0	0	0	0	0	0	0	0	0	0	0	0	0	0	0	0	0	0	0	0	0	0	0.284706	0	0	0	0	0	0	0	0	0	0	0	0	0	0	0
lib230331_CTCGAGGCAATCCTAG-1	0	0	0	0	0	0	0	0	0	0	0	0.184697	0	0	0	0.135246	0	0	0	0	0	0	0	0.20436	0	0	0	0	0	0	0	0.726974	0	0.157647	0	0	0	0	0	0	0	0	0	0	0	0	0	0.184697	0
lib230331_CTCTCAGAGTCATCGT-1	0	0	0	0	0	0	0	0	0	0	0	0	0	0	0	0	0	0	0	0	0	0	0	0	0	0	0	0	0	0	0	0	0	0.284706	0	0	0	0	0	0	0	0	0	0	0	0	0	0	0
lib230331_CTGAGCGAGGGAGGGT-1	0	0.029932	0	0	0	0	0	0	0	0	0	0	0	0	0	0.131148	0	0.0860215	0	0	0	0.142529	0	0.321526	0	0	0	0	0	0	0	0	0	0.258824	0	0	0	0	0	0	0	0	0.029932	0	0	0	0	0	0
lib230331_CTGCCTATCATCCTGC-1	0	0.176871	0	0	0	0.340633	0	0	0	0	0	0	0	0	0	0	0	0	0	0.215909	0	0.172414	0	0.152589	0	0.373016	0	0	0	0	0	0.203947	0	0	0	0	0	0	0	0	0	0	0.176871	0	0.340633	0	0	0	0
lib230331_CTGGCAGTCCCTTGGT-1	0	0	0	0	0	0	0	0	0	0	0	0	0	0	0	0	0	0.146953	0	0	0	0.114943	0	0.234332	0	0	0	0	0	0	0	0.134868	0	0.263529	0	0	0	0	0	0	0	0	0	0	0	0	0	0	0
lib230331_CTGTATTTCAATCAGC-1	0	0	0	0	0	0	0	0	0	0	0	0	0	0	0	0	0	0.146953	0	0	0	0.114943	0	0.234332	0	0	0	0	0	0	0	0.134868	0	0.263529	0	0	0	0	0	0	0	0	0	0	0	0	0	0	0
lib230331_CTTCCTTAGCTTTGTG-1	0	0.176871	0	0	0	0.340633	0	0	0	0	0	0	0	0	0	0	0	0	0	0.215909	0	0.172414	0	0.152589	0	0.373016	0	0	0	0	0	0.203947	0	0	0	0	0	0	0	0	0	0	0.176871	0	0.340633	0	0	0	0
lib230331_CTTCCTTAGTCCTACA-1	0	0.029932	0	0	0	0	0	0	0	0	0	0	0	0	0	0.131148	0	0.0860215	0	0	0	0.142529	0	0.321526	0	0	0	0	0	0	0	0	0	0.258824	0	0	0	0	0	0	0	0	0.029932	0	0	0	0	0	0
lib230331_CTTCTCTCACACCTAA-1	0	0.176871	0	0	0	0.340633	0	0	0	0	0	0	0	0	0	0	0	0	0	0.215909	0	0.172414	0	0.152589	0	0.373016	0	0	0	0	0	0.203947	0	0	0	0	0	0	0	0	0	0	0.176871	0	0.340633	0	0	0	0
lib230331_CTTGAGAGTCAGGAGT-1	0	0.029932	0	0	0	0	0	0	0	0	0	0	0	0	0	0.131148	0	0.0860215	0	0	0	0.142529	0	0.321526	0	0	0	0	0	0	0	0	0	0.258824	0	0	0	0	0	0	0	0	0.029932	0	0	0	0	0	0
lib230331_CTTTCAATCGAACCTA-1	0	0	0	0	0	0	0	0	0	0	0	0	0	0	0	0	0	0.146953	0	0	0	0.114943	0	0.234332	0	0	0	0	0	0	0	0.134868	0	0.263529	0	0	0	0	0	0	0	0	0	0	0	0	0	0	0
lib230331_GAAACCTAGATTAGTG-1	0	0	0	0	0	0	0	0	0	0	0	0	0	0	0	0	0	0.146953	0	0	0	0.114943	0	0.234332	0	0	0	0	0	0	0	0.134868	0	0.263529	0	0	0	0	0	0	0	0	0	0	0	0	0	0	0
lib230331_GAATCGTTCGGCATCG-1	0	0.029932	0	0	0	0	0	0	0	0	0	0	0	0	0	0.131148	0	0.0860215	0	0	0	0.142529	0	0.321526	0	0	0	0	0	0	0	0	0	0.258824	0	0	0	0	0	0	0	0	0.029932	0	0	0	0	0	0
lib230331_GACACGCTCTTCGTAT-1	0	0	0	0	0	0	0	0	0	0	0	0	0	0	0	0	0	0	0	0	0	0	0	0	0	0	0	0	0	0	0	0	0	0.284706	0	0	0	0	0	0	0	0	0	0	0	0	0	0	0
lib230331_GACATCAAGGATATGT-1	0	0	0	0	0	0	0	0	0	0	0	0	0	0	0	0	0	0	0	0	0	0	0	0	0	0	0	0	0	0	0	0	0	0.284706	0	0	0	0	0	0	0	0	0	0	0	0	0	0	0
lib230331_GACATCACAAATGGTA-1	0	0.029932	0	0	0	0	0	0	0	0	0	0	0	0	0	0.131148	0	0.0860215	0	0	0	0.142529	0	0.321526	0	0	0	0	0	0	0	0	0	0.258824	0	0	0	0	0	0	0	0	0.029932	0	0	0	0	0	0
lib230331_GACCGTGAGCACACAG-1	0	0.176871	0	0	0	0.340633	0	0	0	0	0	0	0	0	0	0	0	0	0	0.215909	0	0.172414	0	0.152589	0	0.373016	0	0	0	0	0	0.203947	0	0	0	0	0	0	0	0	0	0	0.176871	0	0.340633	0	0	0	0
lib230331_GACCTTCTCCATCGTC-1	0	0	0	0	0	0	0	0	0	0	0	0	0	0	0	0	0	0	0	0	0	0	0	0	0	0	0	0	0	0	0	0	0	0.284706	0	0	0	0	0	0	0	0	0	0	0	0	0	0	0
lib230331_GACGCTGCAGATCATC-1	0	0	0	0	0	0	0	0	0	0	0	0	0	0	0	0	0	0.146953	0	0	0	0.114943	0	0.234332	0	0	0	0	0	0	0	0.134868	0	0.263529	0	0	0	0	0	0	0	0	0	0	0	0	0	0	0
lib230331_GAGAAATAGTCAATCC-1	0	0.029932	0	0	0	0	0	0	0	0	0	0	0	0	0	0.131148	0	0.0860215	0	0	0	0.142529	0	0.321526	0	0	0	0	0	0	0	0	0	0.258824	0	0	0	0	0	0	0	0	0.029932	0	0	0	0	0	0
lib230331_GAGAAATCAAAGAACT-1	0	0.029932	0	0	0	0	0	0	0	0	0	0	0	0	0	0.131148	0	0.0860215	0	0	0	0.142529	0	0.321526	0	0	0	0	0	0	0	0	0	0.258824	0	0	0	0	0	0	0	0	0.029932	0	0	0	0	0	0
lib230331_GAGAGGTAGAGCACTG-1	0	0.176871	0	0	0	0.340633	0	0	0	0	0	0	0	0	0	0	0	0	0	0.215909	0	0.172414	0	0.152589	0	0.373016	0	0	0	0	0	0.203947	0	0	0	0	0	0	0	0	0	0	0.176871	0	0.340633	0	0	0	0
lib230331_GAGAGGTGTTGCGTAT-1	0	0.029932	0	0	0	0	0	0	0	0	0	0	0	0	0	0.131148	0	0.0860215	0	0	0	0.142529	0	0.321526	0	0	0	0	0	0	0	0	0	0.258824	0	0	0	0	0	0	0	0	0.029932	0	0	0	0	0	0
lib230331_GAGGGATCAGAAACCG-1	0	0	0	0	0	0	0	0	0	0	0	0	0	0	0	0	0	0	0	0	0	0	0	0	0	0	0	0	0	0	0	0	0	0.284706	0	0	0	0	0	0	0	0	0	0	0	0	0	0	0
lib230331_GAGGGTATCCTACCAC-1	0	0.029932	0	0	0	0	0	0	0	0	0	0	0	0	0	0.131148	0	0.0860215	0	0	0	0.142529	0	0.321526	0	0	0	0	0	0	0	0	0	0.258824	0	0	0	0	0	0	0	0	0.029932	0	0	0	0	0	0
lib230331_GAGTGTTCACATATCG-1	0	0.029932	0	0	0	0	0	0	0	0	0	0	0	0	0	0.131148	0	0.0860215	0	0	0	0.142529	0	0.321526	0	0	0	0	0	0	0	0	0	0.258824	0	0	0	0	0	0	0	0	0.029932	0	0	0	0	0	0
lib230331_GAGTTGTCAACGGTAG-1	0	0.029932	0	0	0	0	0	0	0	0	0	0	0	0	0	0.131148	0	0.0860215	0	0	0	0.142529	0	0.321526	0	0	0	0	0	0	0	0	0	0.258824	0	0	0	0	0	0	0	0	0.029932	0	0	0	0	0	0
lib230331_GATGACTTCAGTCACA-1	0	0	0	0	0	0	0	0	0	0	0	0.184697	0	0	0	0.135246	0	0	0	0	0	0	0	0.20436	0	0	0	0	0	0	0	0.726974	0	0.157647	0	0	0	0	0	0	0	0	0	0	0	0	0	0.184697	0
lib230331_GATGTTGCAACGATTC-1	0	0	0	0	0	0	0	0	0	0	0	0	0	0	0	0	0	0	0	0	0	0	0	0	0	0	0	0	0	0	0	0	0	0.284706	0	0	0	0	0	0	0	0	0	0	0	0	0	0	0
lib230331_GATGTTGCAGCTGTAT-1	0	0.176871	0	0	0	0.340633	0	0	0	0	0	0	0	0	0	0	0	0	0	0.215909	0	0.172414	0	0.152589	0	0.373016	0	0	0	0	0	0.203947	0	0	0	0	0	0	0	0	0	0	0.176871	0	0.340633	0	0	0	0
lib230331_GATTCTTTCCGACATA-1	0	0	0	0	0	0	0	0	0	0	0	0	0	0	0	0	0	0	0	0	0	0	0	0	0	0	0	0	0	0	0	0	0	0.284706	0	0	0	0	0	0	0	0	0	0	0	0	0	0	0
lib230331_GATTTCTGTTATCTGG-1	0	0	0	0	0	0	0	0	0	0	0	0	0	0	0	0	0	0.146953	0	0	0	0.114943	0	0.234332	0	0	0	0	0	0	0	0.134868	0	0.263529	0	0	0	0	0	0	0	0	0	0	0	0	0	0	0
lib230331_GCACGGTCAGGAACCA-1	0	0	0	0	0	0	0	0	0	0	0	0	0	0	0	0	0	0	0	0	0	0	0	0	0	0	0	0	0	0	0	0	0	0.284706	0	0	0	0	0	0	0	0	0	0	0	0	0	0	0
lib230331_GCAGCTGTCGGTCTGG-1	0	0	0	0	0	0	0	0	0	0	0	0	0	0	0	0	0	0.146953	0	0	0	0.114943	0	0.234332	0	0	0	0	0	0	0	0.134868	0	0.263529	0	0	0	0	0	0	0	0	0	0	0	0	0	0	0
lib230331_GCCAGCAGTCCGCAGT-1	0	0.029932	0	0	0	0	0	0	0	0	0	0	0	0	0	0.131148	0	0.0860215	0	0	0	0.142529	0	0.321526	0	0	0	0	0	0	0	0	0	0.258824	0	0	0	0	0	0	0	0	0.029932	0	0	0	0	0	0
lib230331_GCCATTCAGACAACTA-1	0	0.176871	0	0	0	0.340633	0	0	0	0	0	0	0	0	0	0	0	0	0	0.215909	0	0.172414	0	0.152589	0	0.373016	0	0	0	0	0	0.203947	0	0	0	0	0	0	0	0	0	0	0.176871	0	0.340633	0	0	0	0
lib230331_GCCATTCGTGAAGCGT-1	0	0.029932	0	0	0	0	0	0	0	0	0	0	0	0	0	0.131148	0	0.0860215	0	0	0	0.142529	0	0.321526	0	0	0	0	0	0	0	0	0	0.258824	0	0	0	0	0	0	0	0	0.029932	0	0	0	0	0	0
lib230331_GCGATCGAGCGCCCAT-1	0	0	0	0	0	0	0	0	0	0	0	0	0	0	0	0	0	0	0	0	0	0	0	0	0	0	0	0	0	0	0	0	0	0.284706	0	0	0	0	0	0	0	0	0	0	0	0	0	0	0
lib230331_GCTACCTCACCGGAAA-1	0	0	0	0	0	0	0	0	0	0	0	0	0	0	0	0	0	0.146953	0	0	0	0.114943	0	0.234332	0	0	0	0	0	0	0	0.134868	0	0.263529	0	0	0	0	0	0	0	0	0	0	0	0	0	0	0
lib230331_GCTCAAAGTGAATGAT-1	0	0	0	0	0	0	0	0	0	0	0	0	0	0	0	0	0	0	0	0	0	0	0	0	0	0	0	0	0	0	0	0	0	0.284706	0	0	0	0	0	0	0	0	0	0	0	0	0	0	0
lib230331_GCTGAATAGATGACCG-1	0	0.176871	0	0	0	0.340633	0	0	0	0	0	0	0	0	0	0	0	0	0	0.215909	0	0.172414	0	0.152589	0	0.373016	0	0	0	0	0	0.203947	0	0	0	0	0	0	0	0	0	0	0.176871	0	0.340633	0	0	0	0
lib230331_GGAATGGCAAACGGCA-1	0	0.029932	0	0	0	0	0	0	0	0	0	0	0	0	0	0.131148	0	0.0860215	0	0	0	0.142529	0	0.321526	0	0	0	0	0	0	0	0	0	0.258824	0	0	0	0	0	0	0	0	0.029932	0	0	0	0	0	0
lib230331_GGATGTTAGTCACAGG-1	0	0.029932	0	0	0	0	0	0	0	0	0	0	0	0	0	0.131148	0	0.0860215	0	0	0	0.142529	0	0.321526	0	0	0	0	0	0	0	0	0	0.258824	0	0	0	0	0	0	0	0	0.029932	0	0	0	0	0	0
lib230331_GGCTGTGCAATAACGA-1	0	0	0	0	0	0	0	0	0	0	0	0	0	0	0	0	0	0	0	0	0	0	0	0	0	0	0	0	0	0	0	0	0	0.284706	0	0	0	0	0	0	0	0	0	0	0	0	0	0	0
lib230331_GGCTTGGTCACCATGA-1	0	0.029932	0	0	0	0	0	0	0	0	0	0	0	0	0	0.131148	0	0.0860215	0	0	0	0.142529	0	0.321526	0	0	0	0	0	0	0	0	0	0.258824	0	0	0	0	0	0	0	0	0.029932	0	0	0	0	0	0
lib230331_GGGACCTTCTCATTAC-1	0	0	0	0	0	0	0	0	0	0	0	0	0	0	0	0	0	0.146953	0	0	0	0.114943	0	0.234332	0	0	0	0	0	0	0	0.134868	0	0.263529	0	0	0	0	0	0	0	0	0	0	0	0	0	0	0
lib230331_GGGCCATTCAAGGAGC-1	0	0.029932	0	0	0	0	0	0	0	0	0	0	0	0	0	0.131148	0	0.0860215	0	0	0	0.142529	0	0.321526	0	0	0	0	0	0	0	0	0	0.258824	0	0	0	0	0	0	0	0	0.029932	0	0	0	0	0	0
lib230331_GGGTGAACACACCGCA-1	0	0.029932	0	0	0	0	0	0	0	0	0	0	0	0	0	0.131148	0	0.0860215	0	0	0	0.142529	0	0.321526	0	0	0	0	0	0	0	0	0	0.258824	0	0	0	0	0	0	0	0	0.029932	0	0	0	0	0	0
lib230331_GGGTGAACATCATTGG-1	0	0	0	0	0	0	0	0	0	0	0	0	0	0	0	0	0	0.146953	0	0	0	0.114943	0	0.234332	0	0	0	0	0	0	0	0.134868	0	0.263529	0	0	0	0	0	0	0	0	0	0	0	0	0	0	0
lib230331_GGTGAAGAGTAGAATC-1	0	0.176871	0	0	0	0.340633	0	0	0	0	0	0	0	0	0	0	0	0	0	0.215909	0	0.172414	0	0.152589	0	0.373016	0	0	0	0	0	0.203947	0	0	0	0	0	0	0	0	0	0	0.176871	0	0.340633	0	0	0	0
lib230331_GTAATGCTCTTTCGAT-1	0	0.029932	0	0	0	0	0	0	0	0	0	0	0	0	0	0.131148	0	0.0860215	0	0	0	0.142529	0	0.321526	0	0	0	0	0	0	0	0	0	0.258824	0	0	0	0	0	0	0	0	0.029932	0	0	0	0	0	0
lib230331_GTACAACAGAACTCCT-1	0	0.029932	0	0	0	0	0	0	0	0	0	0	0	0	0	0.131148	0	0.0860215	0	0	0	0.142529	0	0.321526	0	0	0	0	0	0	0	0	0	0.258824	0	0	0	0	0	0	0	0	0.029932	0	0	0	0	0	0
lib230331_GTACAGTTCGCACGAC-1	0	0	0	0	0	0	0	0	0	0	0	0	0	0	0	0	0	0.146953	0	0	0	0.114943	0	0.234332	0	0	0	0	0	0	0	0.134868	0	0.263529	0	0	0	0	0	0	0	0	0	0	0	0	0	0	0
lib230331_GTAGAGGAGGAACTCG-1	0	0.176871	0	0	0	0.340633	0	0	0	0	0	0	0	0	0	0	0	0	0	0.215909	0	0.172414	0	0.152589	0	0.373016	0	0	0	0	0	0.203947	0	0	0	0	0	0	0	0	0	0	0.176871	0	0.340633	0	0	0	0
lib230331_GTAGCTATCACCTCGT-1	0	0	0	0	0	0	0	0	0	0	0	0	0	0	0	0	0	0.146953	0	0	0	0.114943	0	0.234332	0	0	0	0	0	0	0	0.134868	0	0.263529	0	0	0	0	0	0	0	0	0	0	0	0	0	0	0
lib230331_GTATTTCTCTCTAGGA-1	0	0	0	0	0	0	0	0	0	0	0	0	0	0	0	0	0	0	0	0	0	0	0	0	0	0	0	0	0	0	0	0	0	0.284706	0	0	0	0	0	0	0	0	0	0	0	0	0	0	0
lib230331_GTCATCCAGGTTGGAC-1	0	0	0	0	0	0	0	0	0	0	0	0	0	0	0	0	0	0.146953	0	0	0	0.114943	0	0.234332	0	0	0	0	0	0	0	0.134868	0	0.263529	0	0	0	0	0	0	0	0	0	0	0	0	0	0	0
lib230331_GTCGTAAGTCATTGCA-1	0	0.029932	0	0	0	0	0	0	0	0	0	0	0	0	0	0.131148	0	0.0860215	0	0	0	0.142529	0	0.321526	0	0	0	0	0	0	0	0	0	0.258824	0	0	0	0	0	0	0	0	0.029932	0	0	0	0	0	0
lib230331_GTCGTTCGTCGTACTA-1	0	0.029932	0	0	0	0	0	0	0	0	0	0	0	0	0	0.131148	0	0.0860215	0	0	0	0.142529	0	0.321526	0	0	0	0	0	0	0	0	0	0.258824	0	0	0	0	0	0	0	0	0.029932	0	0	0	0	0	0
lib230331_GTCTGTCAGTTCATGC-1	0	0	0	0	0	0	0	0	0	0	0	0	0	0	0	0	0	0.146953	0	0	0	0.114943	0	0.234332	0	0	0	0	0	0	0	0.134868	0	0.263529	0	0	0	0	0	0	0	0	0	0	0	0	0	0	0
lib230331_GTCTGTCCAAGAGTAT-1	0	0	0	0	0	0	0	0	0	0	0	0	0	0	0	0	0	0.146953	0	0	0	0.114943	0	0.234332	0	0	0	0	0	0	0	0.134868	0	0.263529	0	0	0	0	0	0	0	0	0	0	0	0	0	0	0
lib230331_GTGAGTTTCACCATCC-1	0	0.029932	0	0	0	0	0	0	0	0	0	0	0	0	0	0.131148	0	0.0860215	0	0	0	0.142529	0	0.321526	0	0	0	0	0	0	0	0	0	0.258824	0	0	0	0	0	0	0	0	0.029932	0	0	0	0	0	0
lib230331_GTGCTGGCAACCGGAA-1	0	0	0	0	0	0	0	0	0	0	0	0	0	0	0	0	0	0.146953	0	0	0	0.114943	0	0.234332	0	0	0	0	0	0	0	0.134868	0	0.263529	0	0	0	0	0	0	0	0	0	0	0	0	0	0	0
lib230331_GTGGTTATCAGTCTTT-1	0	0	0	0	0	0	0	0	0	0	0	0	0	0	0	0	0	0	0	0	0	0	0	0	0	0	0	0	0	0	0	0	0	0.284706	0	0	0	0	0	0	0	0	0	0	0	0	0	0	0
lib230331_GTGTGATCACTCCTTG-1	0	0.029932	0	0	0	0	0	0	0	0	0	0	0	0	0	0.131148	0	0.0860215	0	0	0	0.142529	0	0.321526	0	0	0	0	0	0	0	0	0	0.258824	0	0	0	0	0	0	0	0	0.029932	0	0	0	0	0	0
lib230331_GTGTGGCCAGACTGCC-1	0	0	0	0	0	0	0	0	0	0	0	0	0	0	0	0	0	0.146953	0	0	0	0.114943	0	0.234332	0	0	0	0	0	0	0	0.134868	0	0.263529	0	0	0	0	0	0	0	0	0	0	0	0	0	0	0
lib230331_GTTACGAAGAGAGGGC-1	0	0.029932	0	0	0	0	0	0	0	0	0	0	0	0	0	0.131148	0	0.0860215	0	0	0	0.142529	0	0.321526	0	0	0	0	0	0	0	0	0	0.258824	0	0	0	0	0	0	0	0	0.029932	0	0	0	0	0	0
lib230331_GTTACGAGTTCTCCAC-1	0	0	0	0	0	0	0	0	0	0	0	0	0	0	0	0	0	0.146953	0	0	0	0.114943	0	0.234332	0	0	0	0	0	0	0	0.134868	0	0.263529	0	0	0	0	0	0	0	0	0	0	0	0	0	0	0
lib230331_GTTAGACCACGCAGTC-1	0	0.176871	0	0	0	0.340633	0	0	0	0	0	0	0	0	0	0	0	0	0	0.215909	0	0.172414	0	0.152589	0	0.373016	0	0	0	0	0	0.203947	0	0	0	0	0	0	0	0	0	0	0.176871	0	0.340633	0	0	0	0
lib230331_GTTCATTAGACCAGAC-1	0	0	0	0	0	0	0	0	0	0	0	0	0	0	0	0	0	0	0	0	0	0	0	0	0	0	0	0	0	0	0	0	0	0.284706	0	0	0	0	0	0	0	0	0	0	0	0	0	0	0
lib230331_GTTCGCTCAATAGTAG-1	0	0.029932	0	0	0	0	0	0	0	0	0	0	0	0	0	0.131148	0	0.0860215	0	0	0	0.142529	0	0.321526	0	0	0	0	0	0	0	0	0	0.258824	0	0	0	0	0	0	0	0	0.029932	0	0	0	0	0	0
lib230331_GTTGTGAAGACGCATG-1	0	0	0	0	0	0	0	0	0	0	0	0.184697	0	0	0	0.135246	0	0	0	0	0	0	0	0.20436	0	0	0	0	0	0	0	0.726974	0	0.157647	0	0	0	0	0	0	0	0	0	0	0	0	0	0.184697	0
lib230331_TAAGCGTCACCAAAGG-1	0	0.029932	0	0	0	0	0	0	0	0	0	0	0	0	0	0.131148	0	0.0860215	0	0	0	0.142529	0	0.321526	0	0	0	0	0	0	0	0	0	0.258824	0	0	0	0	0	0	0	0	0.029932	0	0	0	0	0	0
lib230331_TACCCACTCTCCGAGG-1	0	0.176871	0	0	0	0.340633	0	0	0	0	0	0	0	0	0	0	0	0	0	0.215909	0	0.172414	0	0.152589	0	0.373016	0	0	0	0	0	0.203947	0	0	0	0	0	0	0	0	0	0	0.176871	0	0.340633	0	0	0	0
lib230331_TACCCGTCATCTAGAC-1	0	0	0	0	0	0	0	0	0	0	0	0	0	0	0	0	0	0.146953	0	0	0	0.114943	0	0.234332	0	0	0	0	0	0	0	0.134868	0	0.263529	0	0	0	0	0	0	0	0	0	0	0	0	0	0	0
lib230331_TACCGAAGTAACAAGT-1	0	0	0	0	0	0	0	0	0	0	0	0	0	0	0	0	0	0.146953	0	0	0	0.114943	0	0.234332	0	0	0	0	0	0	0	0.134868	0	0.263529	0	0	0	0	0	0	0	0	0	0	0	0	0	0	0
lib230331_TACCGGGGTAGCGTAG-1	0	0	0	0	0	0	0	0	0	0	0	0	0	0	0	0	0	0.146953	0	0	0	0.114943	0	0.234332	0	0	0	0	0	0	0	0.134868	0	0.263529	0	0	0	0	0	0	0	0	0	0	0	0	0	0	0
lib230331_TACCTGCCATACTGAC-1	0	0.176871	0	0	0	0.340633	0	0	0	0	0	0	0	0	0	0	0	0	0	0.215909	0	0.172414	0	0.152589	0	0.373016	0	0	0	0	0	0.203947	0	0	0	0	0	0	0	0	0	0	0.176871	0	0.340633	0	0	0	0
lib230331_TACGGTATCAACCTCC-1	0	0.176871	0	0	0	0.340633	0	0	0	0	0	0	0	0	0	0	0	0	0	0.215909	0	0.172414	0	0.152589	0	0.373016	0	0	0	0	0	0.203947	0	0	0	0	0	0	0	0	0	0	0.176871	0	0.340633	0	0	0	0
lib230331_TACTTCAGTGAGCAGT-1	0	0	0	0	0	0	0	0	0	0	0	0	0	0	0	0	0	0	0	0	0	0	0	0	0	0	0	0	0	0	0	0	0	0.284706	0	0	0	0	0	0	0	0	0	0	0	0	0	0	0
lib230331_TACTTCATCGGTGTAT-1	0	0.029932	0	0	0	0	0	0	0	0	0	0	0	0	0	0.131148	0	0.0860215	0	0	0	0.142529	0	0.321526	0	0	0	0	0	0	0	0	0	0.258824	0	0	0	0	0	0	0	0	0.029932	0	0	0	0	0	0
lib230331_TAGACTGAGCTAATCC-1	0	0.029932	0	0	0	0	0	0	0	0	0	0	0	0	0	0.131148	0	0.0860215	0	0	0	0.142529	0	0.321526	0	0	0	0	0	0	0	0	0	0.258824	0	0	0	0	0	0	0	0	0.029932	0	0	0	0	0	0
lib230331_TAGAGTCAGGATGGCT-1	0	0.029932	0	0	0	0	0	0	0	0	0	0	0	0	0	0.131148	0	0.0860215	0	0	0	0.142529	0	0.321526	0	0	0	0	0	0	0	0	0	0.258824	0	0	0	0	0	0	0	0	0.029932	0	0	0	0	0	0
lib230331_TAGGTACCATAAGCAA-1	0	0	0	0	0	0	0	0	0	0	0	0	0	0	0	0	0	0	0	0	0	0	0	0	0	0	0	0	0	0	0	0	0	0.284706	0	0	0	0	0	0	0	0	0	0	0	0	0	0	0
lib230331_TAGTGCACACATGACT-1	0	0	0	0	0	0	0	0	0	0	0	0	0	0	0	0	0	0.146953	0	0	0	0.114943	0	0.234332	0	0	0	0	0	0	0	0.134868	0	0.263529	0	0	0	0	0	0	0	0	0	0	0	0	0	0	0
lib230331_TATCTGTAGCCGATCC-1	0	0	0	0	0	0	0	0	0	0	0	0	0	0	0	0	0	0.146953	0	0	0	0.114943	0	0.234332	0	0	0	0	0	0	0	0.134868	0	0.263529	0	0	0	0	0	0	0	0	0	0	0	0	0	0	0
lib230331_TATCTGTCACACTGGC-1	0	0.195918	0.153535	0.181818	0.167883	0.080292	0	0	0.159236	0.315287	0	0	0	0.173913	0	0.192623	0	0	0	0.174242	0	0.406897	0	0	0.238095	0.198413	0	0.130435	0.676724	0	0.134868	0	0	0.418824	0	0.210526	0	0	0	0	0	0.45679	0.195918	0.335354	0.248175	0	0.474522	0	0.173913
lib230331_TATCTGTCATCACCAA-1	0	0.029932	0	0	0	0	0	0	0	0	0	0	0	0	0	0.131148	0	0.0860215	0	0	0	0.142529	0	0.321526	0	0	0	0	0	0	0	0	0	0.258824	0	0	0	0	0	0	0	0	0.029932	0	0	0	0	0	0
lib230331_TATCTTGCATGAAGGC-1	0	0.029932	0	0	0	0	0	0	0	0	0	0	0	0	0	0.131148	0	0.0860215	0	0	0	0.142529	0	0.321526	0	0	0	0	0	0	0	0	0	0.258824	0	0	0	0	0	0	0	0	0.029932	0	0	0	0	0	0
lib230331_TATGTTCGTATTAAGG-1	0	0.029932	0	0	0	0	0	0	0	0	0	0	0	0	0	0.131148	0	0.0860215	0	0	0	0.142529	0	0.321526	0	0	0	0	0	0	0	0	0	0.258824	0	0	0	0	0	0	0	0	0.029932	0	0	0	0	0	0
lib230331_TATGTTCGTCTACTGA-1	0	0	0	0	0	0	0	0	0	0	0	0	0	0	0	0	0	0	0	0	0	0	0	0	0	0	0	0	0	0	0	0	0	0.284706	0	0	0	0	0	0	0	0	0	0	0	0	0	0	0
lib230331_TATTCCATCGTCCATC-1	0	0	0	0	0	0	0	0	0	0	0	0	0	0	0	0	0	0	0	0	0	0	0	0	0	0	0	0	0	0	0	0	0	0.284706	0	0	0	0	0	0	0	0	0	0	0	0	0	0	0
lib230331_TATTGCTAGTCATACC-1	0	0.029932	0	0	0	0	0	0	0	0	0	0	0	0	0	0.131148	0	0.0860215	0	0	0	0.142529	0	0.321526	0	0	0	0	0	0	0	0	0	0.258824	0	0	0	0	0	0	0	0	0.029932	0	0	0	0	0	0
lib230331_TCAATCTGTGTGTGTT-1	0	0	0	0	0	0	0	0	0	0	0	0	0	0	0	0	0	0.146953	0	0	0	0.114943	0	0.234332	0	0	0	0	0	0	0	0.134868	0	0.263529	0	0	0	0	0	0	0	0	0	0	0	0	0	0	0
lib230331_TCACAAGAGTGCGACA-1	0	0.029932	0	0	0	0	0	0	0	0	0	0	0	0	0	0.131148	0	0.0860215	0	0	0	0.142529	0	0.321526	0	0	0	0	0	0	0	0	0	0.258824	0	0	0	0	0	0	0	0	0.029932	0	0	0	0	0	0
lib230331_TCACGCTCAACCGCCA-1	0	0.029932	0	0	0	0	0	0	0	0	0	0	0	0	0	0.131148	0	0.0860215	0	0	0	0.142529	0	0.321526	0	0	0	0	0	0	0	0	0	0.258824	0	0	0	0	0	0	0	0	0.029932	0	0	0	0	0	0
lib230331_TCACTCGAGGTTCAGG-1	0	0	0	0	0	0	0	0	0	0	0	0	0	0	0	0	0	0.146953	0	0	0	0.114943	0	0.234332	0	0	0	0	0	0	0	0.134868	0	0.263529	0	0	0	0	0	0	0	0	0	0	0	0	0	0	0
lib230331_TCAGGTAGTATTCCTT-1	0	0	0	0	0	0	0	0	0	0	0	0	0	0	0	0	0	0.146953	0	0	0	0.114943	0	0.234332	0	0	0	0	0	0	0	0.134868	0	0.263529	0	0	0	0	0	0	0	0	0	0	0	0	0	0	0
lib230331_TCAGGTAGTGGCATCC-1	0	0.176871	0	0	0	0.340633	0	0	0	0	0	0	0	0	0	0	0	0	0	0.215909	0	0.172414	0	0.152589	0	0.373016	0	0	0	0	0	0.203947	0	0	0	0	0	0	0	0	0	0	0.176871	0	0.340633	0	0	0	0
lib230331_TCATCCGCACAGTCCG-1	0	0.029932	0	0	0	0	0	0	0	0	0	0	0	0	0	0.131148	0	0.0860215	0	0	0	0.142529	0	0.321526	0	0	0	0	0	0	0	0	0	0.258824	0	0	0	0	0	0	0	0	0.029932	0	0	0	0	0	0
lib230331_TCATTCACAACTGCTA-1	0	0	0	0	0	0	0	0	0	0	0	0	0	0	0	0	0	0.146953	0	0	0	0.114943	0	0.234332	0	0	0	0	0	0	0	0.134868	0	0.263529	0	0	0	0	0	0	0	0	0	0	0	0	0	0	0
lib230331_TCCAGAACAGCAGGAT-1	0	0.176871	0	0	0	0.340633	0	0	0	0	0	0	0	0	0	0	0	0	0	0.215909	0	0.172414	0	0.152589	0	0.373016	0	0	0	0	0	0.203947	0	0	0	0	0	0	0	0	0	0	0.176871	0	0.340633	0	0	0	0
lib230331_TCCCAGTCAACTAGAA-1	0	0.029932	0	0	0	0	0	0	0	0	0	0	0	0	0	0.131148	0	0.0860215	0	0	0	0.142529	0	0.321526	0	0	0	0	0	0	0	0	0	0.258824	0	0	0	0	0	0	0	0	0.029932	0	0	0	0	0	0
lib230331_TCCCAGTTCTAGTTCT-1	0	0.176871	0	0	0	0.340633	0	0	0	0	0	0	0	0	0	0	0	0	0	0.215909	0	0.172414	0	0.152589	0	0.373016	0	0	0	0	0	0.203947	0	0	0	0	0	0	0	0	0	0	0.176871	0	0.340633	0	0	0	0
lib230331_TCCCATGGTCGTGATT-1	0	0.029932	0	0	0	0	0	0	0	0	0	0	0	0	0	0.131148	0	0.0860215	0	0	0	0.142529	0	0.321526	0	0	0	0	0	0	0	0	0	0.258824	0	0	0	0	0	0	0	0	0.029932	0	0	0	0	0	0
lib230331_TCCGATCAGTTCCAGT-1	0	0.029932	0	0	0	0	0	0	0	0	0	0	0	0	0	0.131148	0	0.0860215	0	0	0	0.142529	0	0.321526	0	0	0	0	0	0	0	0	0	0.258824	0	0	0	0	0	0	0	0	0.029932	0	0	0	0	0	0
lib230331_TCCTGCATCGGCGATC-1	0	0.029932	0	0	0	0	0	0	0	0	0	0	0	0	0	0.131148	0	0.0860215	0	0	0	0.142529	0	0.321526	0	0	0	0	0	0	0	0	0	0.258824	0	0	0	0	0	0	0	0	0.029932	0	0	0	0	0	0
lib230331_TCCTTCTGTATTTCCT-1	0	0.176871	0	0	0	0.340633	0	0	0	0	0	0	0	0	0	0	0	0	0	0.215909	0	0.172414	0	0.152589	0	0.373016	0	0	0	0	0	0.203947	0	0	0	0	0	0	0	0	0	0	0.176871	0	0.340633	0	0	0	0
lib230331_TCCTTTCCATGAAGGC-1	0	0	0	0	0	0	0	0	0	0	0	0	0	0	0	0	0	0.146953	0	0	0	0.114943	0	0.234332	0	0	0	0	0	0	0	0.134868	0	0.263529	0	0	0	0	0	0	0	0	0	0	0	0	0	0	0
lib230331_TCGAACACAAGCGGAT-1	0	0.176871	0	0	0	0.340633	0	0	0	0	0	0	0	0	0	0	0	0	0	0.215909	0	0.172414	0	0.152589	0	0.373016	0	0	0	0	0	0.203947	0	0	0	0	0	0	0	0	0	0	0.176871	0	0.340633	0	0	0	0
lib230331_TCGCACTTCCATTCGC-1	0	0	0	0	0	0	0	0	0	0	0	0	0	0	0	0	0	0.146953	0	0	0	0.114943	0	0.234332	0	0	0	0	0	0	0	0.134868	0	0.263529	0	0	0	0	0	0	0	0	0	0	0	0	0	0	0
lib230331_TCGCTCATCCTTTAGT-1	0	0.029932	0	0	0	0	0	0	0	0	0	0	0	0	0	0.131148	0	0.0860215	0	0	0	0.142529	0	0.321526	0	0	0	0	0	0	0	0	0	0.258824	0	0	0	0	0	0	0	0	0.029932	0	0	0	0	0	0
lib230331_TCGGTCTAGTTGTAAG-1	0	0.029932	0	0	0	0	0	0	0	0	0	0	0	0	0	0.131148	0	0.0860215	0	0	0	0.142529	0	0.321526	0	0	0	0	0	0	0	0	0	0.258824	0	0	0	0	0	0	0	0	0.029932	0	0	0	0	0	0
lib230331_TCTAACTGTTGACTAC-1	0	0.029932	0	0	0	0	0	0	0	0	0	0	0	0	0	0.131148	0	0.0860215	0	0	0	0.142529	0	0.321526	0	0	0	0	0	0	0	0	0	0.258824	0	0	0	0	0	0	0	0	0.029932	0	0	0	0	0	0
lib230331_TCTATACGTTCCAAAC-1	0	0.029932	0	0	0	0	0	0	0	0	0	0	0	0	0	0.131148	0	0.0860215	0	0	0	0.142529	0	0.321526	0	0	0	0	0	0	0	0	0	0.258824	0	0	0	0	0	0	0	0	0.029932	0	0	0	0	0	0
lib230331_TCTATCATCTGTCGCT-1	0	0	0	0	0	0	0	0	0	0	0	0	0	0	0	0	0	0.146953	0	0	0	0.114943	0	0.234332	0	0	0	0	0	0	0	0.134868	0	0.263529	0	0	0	0	0	0	0	0	0	0	0	0	0	0	0
lib230331_TCTCACGCAACAGATA-1	0	0	0	0	0	0	0	0	0	0	0	0	0	0	0	0	0	0.146953	0	0	0	0.114943	0	0.234332	0	0	0	0	0	0	0	0.134868	0	0.263529	0	0	0	0	0	0	0	0	0	0	0	0	0	0	0
lib230331_TCTCAGCAGGTGATAT-1	0	0	0	0	0	0	0	0	0	0	0	0	0	0	0	0	0	0.146953	0	0	0	0.114943	0	0.234332	0	0	0	0	0	0	0	0.134868	0	0.263529	0	0	0	0	0	0	0	0	0	0	0	0	0	0	0
lib230331_TCTCAGCGTCAACACT-1	0	0	0	0	0	0	0	0	0	0	0	0	0	0	0	0	0	0	0	0	0	0	0	0	0	0	0	0	0	0	0	0	0	0.284706	0	0	0	0	0	0	0	0	0	0	0	0	0	0	0
lib230331_TCTCCGAAGTTTAGGA-1	0	0.029932	0	0	0	0	0	0	0	0	0	0	0	0	0	0.131148	0	0.0860215	0	0	0	0.142529	0	0.321526	0	0	0	0	0	0	0	0	0	0.258824	0	0	0	0	0	0	0	0	0.029932	0	0	0	0	0	0
lib230331_TCTCTGGTCGAATGCT-1	0	0.029932	0	0	0	0	0	0	0	0	0	0	0	0	0	0.131148	0	0.0860215	0	0	0	0.142529	0	0.321526	0	0	0	0	0	0	0	0	0	0.258824	0	0	0	0	0	0	0	0	0.029932	0	0	0	0	0	0
lib230331_TCTGCCATCACGACTA-1	0	0	0	0	0	0	0	0	0	0	0	0	0	0	0	0	0	0	0	0	0	0	0	0	0	0	0	0	0	0	0	0	0	0.284706	0	0	0	0	0	0	0	0	0	0	0	0	0	0	0
lib230331_TCTTAGTCATGGCTGC-1	0	0	0	0	0	0	0	0	0	0	0	0	0	0	0	0	0	0.146953	0	0	0	0.114943	0	0.234332	0	0	0	0	0	0	0	0.134868	0	0.263529	0	0	0	0	0	0	0	0	0	0	0	0	0	0	0
lib230331_TGAGACTCAAATCAGA-1	0	0	0	0	0	0	0	0	0	0	0	0	0	0	0	0	0	0	0	0	0	0	0	0	0	0	0	0	0	0	0	0	0	0.284706	0	0	0	0	0	0	0	0	0	0	0	0	0	0	0
lib230331_TGAGCGCCATCGGATT-1	0	0.176871	0	0	0	0.340633	0	0	0	0	0	0	0	0	0	0	0	0	0	0.215909	0	0.172414	0	0.152589	0	0.373016	0	0	0	0	0	0.203947	0	0	0	0	0	0	0	0	0	0	0.176871	0	0.340633	0	0	0	0
lib230331_TGATTCTGTATCTCGA-1	0	0.029932	0	0	0	0	0	0	0	0	0	0	0	0	0	0.131148	0	0.0860215	0	0	0	0.142529	0	0.321526	0	0	0	0	0	0	0	0	0	0.258824	0	0	0	0	0	0	0	0	0.029932	0	0	0	0	0	0
lib230331_TGATTCTTCAGCTGTA-1	0	0	0	0	0	0	0	0	0	0	0	0	0	0	0	0	0	0	0	0	0	0	0	0	0	0	0	0	0	0	0	0	0	0.284706	0	0	0	0	0	0	0	0	0	0	0	0	0	0	0
lib230331_TGATTTCCAACAACAA-1	0	0	0	0	0	0	0	0	0	0	0	0	0	0	0	0	0	0.146953	0	0	0	0.114943	0	0.234332	0	0	0	0	0	0	0	0.134868	0	0.263529	0	0	0	0	0	0	0	0	0	0	0	0	0	0	0
lib230331_TGCAGGCTCTTACGGA-1	0	0.029932	0	0	0	0	0	0	0	0	0	0	0	0	0	0.131148	0	0.0860215	0	0	0	0.142529	0	0.321526	0	0	0	0	0	0	0	0	0	0.258824	0	0	0	0	0	0	0	0	0.029932	0	0	0	0	0	0
lib230331_TGCATCCCAATCCAGT-1	0	0.029932	0	0	0	0	0	0	0	0	0	0	0	0	0	0.131148	0	0.0860215	0	0	0	0.142529	0	0.321526	0	0	0	0	0	0	0	0	0	0.258824	0	0	0	0	0	0	0	0	0.029932	0	0	0	0	0	0
lib230331_TGCCGAGAGGTGTGAC-1	0	0	0	0	0	0	0	0	0	0	0	0	0	0	0	0	0	0.146953	0	0	0	0.114943	0	0.234332	0	0	0	0	0	0	0	0.134868	0	0.263529	0	0	0	0	0	0	0	0	0	0	0	0	0	0	0
lib230331_TGCCGAGAGTAGACAT-1	0	0.029932	0	0	0	0	0	0	0	0	0	0	0	0	0	0.131148	0	0.0860215	0	0	0	0.142529	0	0.321526	0	0	0	0	0	0	0	0	0	0.258824	0	0	0	0	0	0	0	0	0.029932	0	0	0	0	0	0
lib230331_TGCGGCAGTATCGCTA-1	0	0	0	0	0	0	0	0	0	0	0	0	0	0	0	0	0	0	0	0	0	0	0	0	0	0	0	0	0	0	0	0	0	0.284706	0	0	0	0	0	0	0	0	0	0	0	0	0	0	0
lib230331_TGCGGGTCAGTAACAA-1	0	0.029932	0	0	0	0	0	0	0	0	0	0	0	0	0	0.131148	0	0.0860215	0	0	0	0.142529	0	0.321526	0	0	0	0	0	0	0	0	0	0.258824	0	0	0	0	0	0	0	0	0.029932	0	0	0	0	0	0
lib230331_TGCTGAAAGGATACAT-1	0	0	0	0	0	0	0	0	0	0	0	0	0	0	0	0	0	0	0	0	0	0	0	0	0	0	0	0	0	0	0	0	0	0.284706	0	0	0	0	0	0	0	0	0	0	0	0	0	0	0
lib230331_TGGAACTAGTAACGTA-1	0	0	0	0	0	0	0	0	0	0	0	0	0	0	0	0	0	0	0	0	0	0	0	0	0	0	0	0	0	0	0	0	0	0.284706	0	0	0	0	0	0	0	0	0	0	0	0	0	0	0
lib230331_TGGGATTTCTTACCGC-1	0	0	0	0	0	0	0	0	0	0	0	0	0	0	0	0	0	0.146953	0	0	0	0.114943	0	0.234332	0	0	0	0	0	0	0	0.134868	0	0.263529	0	0	0	0	0	0	0	0	0	0	0	0	0	0	0
lib230331_TGTCCACAGGCCATAG-1	0	0.029932	0	0	0	0	0	0	0	0	0	0	0	0	0	0.131148	0	0.0860215	0	0	0	0.142529	0	0.321526	0	0	0	0	0	0	0	0	0	0.258824	0	0	0	0	0	0	0	0	0.029932	0	0	0	0	0	0
lib230331_TGTCCCAGTCATTCCC-1	0	0.176871	0	0	0	0.340633	0	0	0	0	0	0	0	0	0	0	0	0	0	0.215909	0	0.172414	0	0.152589	0	0.373016	0	0	0	0	0	0.203947	0	0	0	0	0	0	0	0	0	0	0.176871	0	0.340633	0	0	0	0
lib230331_TGTCCTGGTCCCGGTA-1	0	0	0	0	0	0	0	0	0	0	0	0	0	0	0	0	0	0.146953	0	0	0	0.114943	0	0.234332	0	0	0	0	0	0	0	0.134868	0	0.263529	0	0	0	0	0	0	0	0	0	0	0	0	0	0	0
lib230331_TGTGAGTCACCATTCC-1	0	0	0	0	0	0	0	0	0	0	0	0	0	0	0	0	0	0	0	0	0	0	0	0	0	0	0	0	0	0	0	0	0	0.284706	0	0	0	0	0	0	0	0	0	0	0	0	0	0	0
lib230331_TGTGGCGGTGGTTCTA-1	0	0.029932	0	0	0	0	0	0	0	0	0	0	0	0	0	0.131148	0	0.0860215	0	0	0	0.142529	0	0.321526	0	0	0	0	0	0	0	0	0	0.258824	0	0	0	0	0	0	0	0	0.029932	0	0	0	0	0	0
lib230331_TGTTCATTCAAGCTTG-1	0	0.029932	0	0	0	0	0	0	0	0	0	0	0	0	0	0.131148	0	0.0860215	0	0	0	0.142529	0	0.321526	0	0	0	0	0	0	0	0	0	0.258824	0	0	0	0	0	0	0	0	0.029932	0	0	0	0	0	0
lib230331_TTACCGCTCGTGCAGC-1	0	0	0	0	0	0	0	0	0	0	0	0	0	0	0	0	0	0.146953	0	0	0	0.114943	0	0.234332	0	0	0	0	0	0	0	0.134868	0	0.263529	0	0	0	0	0	0	0	0	0	0	0	0	0	0	0
lib230331_TTACGCCCACAGTCCG-1	0	0	0	0	0	0	0	0	0	0	0	0	0	0	0	0	0	0.146953	0	0	0	0.114943	0	0.234332	0	0	0	0	0	0	0	0.134868	0	0.263529	0	0	0	0	0	0	0	0	0	0	0	0	0	0	0
lib230331_TTCAATCTCGATCCCT-1	0	0.029932	0	0	0	0	0	0	0	0	0	0	0	0	0	0.131148	0	0.0860215	0	0	0	0.142529	0	0.321526	0	0	0	0	0	0	0	0	0	0.258824	0	0	0	0	0	0	0	0	0.029932	0	0	0	0	0	0
lib230331_TTCATGTGTCTACGTA-1	0	0	0	0	0	0	0	0	0	0	0	0	0	0	0	0	0	0	0	0	0	0	0	0	0	0	0	0	0	0	0	0	0	0.284706	0	0	0	0	0	0	0	0	0	0	0	0	0	0	0
lib230331_TTCGGTCCATGCCATA-1	0	0.029932	0	0	0	0	0	0	0	0	0	0	0	0	0	0.131148	0	0.0860215	0	0	0	0.142529	0	0.321526	0	0	0	0	0	0	0	0	0	0.258824	0	0	0	0	0	0	0	0	0.029932	0	0	0	0	0	0
lib230331_TTCGGTCGTTCCCAAA-1	0	0.176871	0	0	0	0.340633	0	0	0	0	0	0	0	0	0	0	0	0	0	0.215909	0	0.172414	0	0.152589	0	0.373016	0	0	0	0	0	0.203947	0	0	0	0	0	0	0	0	0	0	0.176871	0	0.340633	0	0	0	0
lib230331_TTCTCTCCATGACAGG-1	0	0.176871	0	0	0	0.340633	0	0	0	0	0	0	0	0	0	0	0	0	0	0.215909	0	0.172414	0	0.152589	0	0.373016	0	0	0	0	0	0.203947	0	0	0	0	0	0	0	0	0	0	0.176871	0	0.340633	0	0	0	0
lib230331_TTGCATTAGCATACTC-1	0	0.176871	0	0	0	0.340633	0	0	0	0	0	0	0	0	0	0	0	0	0	0.215909	0	0.172414	0	0.152589	0	0.373016	0	0	0	0	0	0.203947	0	0	0	0	0	0	0	0	0	0	0.176871	0	0.340633	0	0	0	0
lib230331_TTGCCTGAGTAGATCA-1	0	0	0	0	0	0	0	0	0	0	0	0	0	0	0	0	0	0	0	0	0	0	0	0	0	0	0	0	0	0	0	0	0	0.284706	0	0	0	0	0	0	0	0	0	0	0	0	0	0	0
lib230331_TTGCGTCAGAGGATCC-1	0	0	0	0	0	0	0	0	0	0	0	0	0	0	0	0	0	0	0	0	0	0	0	0	0	0	0	0	0	0	0	0	0	0.284706	0	0	0	0	0	0	0	0	0	0	0	0	0	0	0
lib230331_TTGGATGAGGGAGATA-1	0	0	0	0	0	0	0	0	0	0	0	0	0	0	0	0	0	0.146953	0	0	0	0.114943	0	0.234332	0	0	0	0	0	0	0	0.134868	0	0.263529	0	0	0	0	0	0	0	0	0	0	0	0	0	0	0
lib230331_TTGGATGCAGAGGCAT-1	0	0.176871	0	0	0	0.340633	0	0	0	0	0	0	0	0	0	0	0	0	0	0.215909	0	0.172414	0	0.152589	0	0.373016	0	0	0	0	0	0.203947	0	0	0	0	0	0	0	0	0	0	0.176871	0	0.340633	0	0	0	0
lib230331_TTGTTTGGTATCGTGT-1	0	0.029932	0	0	0	0	0	0	0	0	0	0	0	0	0	0.131148	0	0.0860215	0	0	0	0.142529	0	0.321526	0	0	0	0	0	0	0	0	0	0.258824	0	0	0	0	0	0	0	0	0.029932	0	0	0	0	0	0
lib230331_AACGAAACAATGTTGC-1	0	0	0	0	0	0.104623	0	0	0	0	0	0	0	0	0	0.356557	0	0.591398	0	0	0	0.374713	0	0.20436	0	0	0.391304	0	0	0	0	0	0	0.138824	0	0	0	0.218905	0	0	0	0	0	0	0.104623	0	0	0	0
lib230331_AAGACAACACATACTG-1	0.17551	0.336054	0.167677	0.40202	0	0.540146	0	0.391473	0.213376	0	0.311346	0.195251	0	0.463768	0	0.565574	0.340502	0	0	0.94697	0.0827586	0.144828	0.247956	0.237057	0	0.68254	0	0.221344	0	0.349138	0.401316	0.309211	0.221176	0.0752941	0	0	0.109453	0	0	1	0.209877	0.265432	0.511565	0.569697	0.540146	0.391473	0.213376	0.506596	0.463768
lib230331_AAGCCATGTGGATTTC-1	0.17551	0.336054	0.167677	0.40202	0	0.540146	0	0.391473	0.213376	0	0.311346	0.195251	0	0.463768	0	0.565574	0.340502	0	0	0.94697	0.0827586	0.144828	0.247956	0.237057	0	0.68254	0	0.221344	0	0.349138	0.401316	0.309211	0.221176	0.0752941	0	0	0.109453	0	0	1	0.209877	0.265432	0.511565	0.569697	0.540146	0.391473	0.213376	0.506596	0.463768
lib230331_AATGCCACATCTAACG-1	0	0	0	0	0	0.104623	0	0	0	0	0	0	0	0	0	0.356557	0	0.591398	0	0	0	0.374713	0	0.20436	0	0	0.391304	0	0	0	0	0	0	0.138824	0	0	0	0.218905	0	0	0	0	0	0	0.104623	0	0	0	0
lib230331_ACAGAAAGTCTTCTAT-1	0.17551	0.336054	0.167677	0.40202	0	0.540146	0	0.391473	0.213376	0	0.311346	0.195251	0	0.463768	0	0.565574	0.340502	0	0	0.94697	0.0827586	0.144828	0.247956	0.237057	0	0.68254	0	0.221344	0	0.349138	0.401316	0.309211	0.221176	0.0752941	0	0	0.109453	0	0	1	0.209877	0.265432	0.511565	0.569697	0.540146	0.391473	0.213376	0.506596	0.463768
lib230331_ACATCCCTCCTTTAGT-1	0.17551	0.336054	0.167677	0.40202	0	0.540146	0	0.391473	0.213376	0	0.311346	0.195251	0	0.463768	0	0.565574	0.340502	0	0	0.94697	0.0827586	0.144828	0.247956	0.237057	0	0.68254	0	0.221344	0	0.349138	0.401316	0.309211	0.221176	0.0752941	0	0	0.109453	0	0	1	0.209877	0.265432	0.511565	0.569697	0.540146	0.391473	0.213376	0.506596	0.463768
lib230331_ACATTTCAGTCTACCA-1	0	0	0	0	0	0.104623	0	0	0	0	0	0	0	0	0	0.356557	0	0.591398	0	0	0	0.374713	0	0.20436	0	0	0.391304	0	0	0	0	0	0	0.138824	0	0	0	0.218905	0	0	0	0	0	0	0.104623	0	0	0	0
lib230331_ACCAACATCTGGCCGA-1	0.17551	0.336054	0.167677	0.40202	0	0.540146	0	0.391473	0.213376	0	0.311346	0.195251	0	0.463768	0	0.565574	0.340502	0	0	0.94697	0.0827586	0.144828	0.247956	0.237057	0	0.68254	0	0.221344	0	0.349138	0.401316	0.309211	0.221176	0.0752941	0	0	0.109453	0	0	1	0.209877	0.265432	0.511565	0.569697	0.540146	0.391473	0.213376	0.506596	0.463768
lib230331_ACCTGAATCCTACTGC-1	0	0	0	0	0	0.104623	0	0	0	0	0	0	0	0	0	0.356557	0	0.591398	0	0	0	0.374713	0	0.20436	0	0	0.391304	0	0	0	0	0	0	0.138824	0	0	0	0.218905	0	0	0	0	0	0	0.104623	0	0	0	0
lib230331_ACCTGTCCAGAACCGA-1	0	0	0	0	0	0.104623	0	0	0	0	0	0	0	0	0	0.356557	0	0.591398	0	0	0	0.374713	0	0.20436	0	0	0.391304	0	0	0	0	0	0	0.138824	0	0	0	0.218905	0	0	0	0	0	0	0.104623	0	0	0	0
lib230331_ACGTACACAGGAGACT-1	0	0	0	0	0	0.104623	0	0	0	0	0	0	0	0	0	0.356557	0	0.591398	0	0	0	0.374713	0	0.20436	0	0	0.391304	0	0	0	0	0	0	0.138824	0	0	0	0.218905	0	0	0	0	0	0	0.104623	0	0	0	0
lib230331_AGAACCTGTCAGGAGT-1	0.17551	0.336054	0.167677	0.40202	0	0.540146	0	0.391473	0.213376	0	0.311346	0.195251	0	0.463768	0	0.565574	0.340502	0	0	0.94697	0.0827586	0.144828	0.247956	0.237057	0	0.68254	0	0.221344	0	0.349138	0.401316	0.309211	0.221176	0.0752941	0	0	0.109453	0	0	1	0.209877	0.265432	0.511565	0.569697	0.540146	0.391473	0.213376	0.506596	0.463768
lib230331_AGCCAGCCACAGAAGC-1	0	0	0	0	0	0.104623	0	0	0	0	0	0	0	0	0	0.356557	0	0.591398	0	0	0	0.374713	0	0.20436	0	0	0.391304	0	0	0	0	0	0	0.138824	0	0	0	0.218905	0	0	0	0	0	0	0.104623	0	0	0	0
lib230331_AGCGCCAAGCTAAGTA-1	0	0	0	0	0	0.104623	0	0	0	0	0	0	0	0	0	0.356557	0	0.591398	0	0	0	0.374713	0	0.20436	0	0	0.391304	0	0	0	0	0	0	0.138824	0	0	0	0.218905	0	0	0	0	0	0	0.104623	0	0	0	0
lib230331_AGGACTTGTTGGGCCT-1	0	0	0	0	0	0.104623	0	0	0	0	0	0	0	0	0	0.356557	0	0.591398	0	0	0	0.374713	0	0.20436	0	0	0.391304	0	0	0	0	0	0	0.138824	0	0	0	0.218905	0	0	0	0	0	0	0.104623	0	0	0	0
lib230331_AGGTCTAAGGATTCAA-1	0	0	0	0	0	0.104623	0	0	0	0	0	0	0	0	0	0.356557	0	0.591398	0	0	0	0.374713	0	0.20436	0	0	0.391304	0	0	0	0	0	0	0.138824	0	0	0	0.218905	0	0	0	0	0	0	0.104623	0	0	0	0
lib230331_AGGTTACAGACCAACG-1	0	0	0	0	0	0.104623	0	0	0	0	0	0	0	0	0	0.356557	0	0.591398	0	0	0	0.374713	0	0.20436	0	0	0.391304	0	0	0	0	0	0	0.138824	0	0	0	0.218905	0	0	0	0	0	0	0.104623	0	0	0	0
lib230331_AGTAGTCAGTGTTCCA-1	0	0	0	0	0	0.104623	0	0	0	0	0	0	0	0	0	0.356557	0	0.591398	0	0	0	0.374713	0	0.20436	0	0	0.391304	0	0	0	0	0	0	0.138824	0	0	0	0.218905	0	0	0	0	0	0	0.104623	0	0	0	0
lib230331_AGTCACAAGCCTGACC-1	0	0	0	0	0	0.104623	0	0	0	0	0	0	0	0	0	0.356557	0	0.591398	0	0	0	0.374713	0	0.20436	0	0	0.391304	0	0	0	0	0	0	0.138824	0	0	0	0.218905	0	0	0	0	0	0	0.104623	0	0	0	0
lib230331_ATCACGAAGGAGTCTG-1	0	0	0	0	0	0.104623	0	0	0	0	0	0	0	0	0	0.356557	0	0.591398	0	0	0	0.374713	0	0.20436	0	0	0.391304	0	0	0	0	0	0	0.138824	0	0	0	0.218905	0	0	0	0	0	0	0.104623	0	0	0	0
lib230331_ATCCATTTCGCGTAGC-1	0	0	0	0	0	0.104623	0	0	0	0	0	0	0	0	0	0.356557	0	0.591398	0	0	0	0.374713	0	0.20436	0	0	0.391304	0	0	0	0	0	0	0.138824	0	0	0	0.218905	0	0	0	0	0	0	0.104623	0	0	0	0
lib230331_ATCGTGATCGAGCTGC-1	0	0	0	0	0	0.104623	0	0	0	0	0	0	0	0	0	0.356557	0	0.591398	0	0	0	0.374713	0	0.20436	0	0	0.391304	0	0	0	0	0	0	0.138824	0	0	0	0.218905	0	0	0	0	0	0	0.104623	0	0	0	0
lib230331_ATCTTCAGTACCACGC-1	0	0	0	0	0	0.104623	0	0	0	0	0	0	0	0	0	0.356557	0	0.591398	0	0	0	0.374713	0	0.20436	0	0	0.391304	0	0	0	0	0	0	0.138824	0	0	0	0.218905	0	0	0	0	0	0	0.104623	0	0	0	0
lib230331_ATGTCTTCATTATGCG-1	0.17551	0.336054	0.167677	0.40202	0	0.540146	0	0.391473	0.213376	0	0.311346	0.195251	0	0.463768	0	0.565574	0.340502	0	0	0.94697	0.0827586	0.144828	0.247956	0.237057	0	0.68254	0	0.221344	0	0.349138	0.401316	0.309211	0.221176	0.0752941	0	0	0.109453	0	0	1	0.209877	0.265432	0.511565	0.569697	0.540146	0.391473	0.213376	0.506596	0.463768
lib230331_ATTGTTCAGGAACGCT-1	0	0	0	0	0	0.104623	0	0	0	0	0	0	0	0	0	0.356557	0	0.591398	0	0	0	0.374713	0	0.20436	0	0	0.391304	0	0	0	0	0	0	0.138824	0	0	0	0.218905	0	0	0	0	0	0	0.104623	0	0	0	0
lib230331_CAAAGAACAAATACGA-1	0.17551	0.336054	0.167677	0.40202	0	0.540146	0	0.391473	0.213376	0	0.311346	0.195251	0	0.463768	0	0.565574	0.340502	0	0	0.94697	0.0827586	0.144828	0.247956	0.237057	0	0.68254	0	0.221344	0	0.349138	0.401316	0.309211	0.221176	0.0752941	0	0	0.109453	0	0	1	0.209877	0.265432	0.511565	0.569697	0.540146	0.391473	0.213376	0.506596	0.463768
lib230331_CACCGTTGTTGCGTAT-1	0	0	0	0	0	0.104623	0	0	0	0	0	0	0	0	0	0.356557	0	0.591398	0	0	0	0.374713	0	0.20436	0	0	0.391304	0	0	0	0	0	0	0.138824	0	0	0	0.218905	0	0	0	0	0	0	0.104623	0	0	0	0
lib230331_CAGTTAGGTACGGATG-1	0	0	0	0	0	0.104623	0	0	0	0	0	0	0	0	0	0.356557	0	0.591398	0	0	0	0.374713	0	0.20436	0	0	0.391304	0	0	0	0	0	0	0.138824	0	0	0	0.218905	0	0	0	0	0	0	0.104623	0	0	0	0
lib230331_CATACCCGTTCTCAGA-1	0	0	0	0	0	0.104623	0	0	0	0	0	0	0	0	0	0.356557	0	0.591398	0	0	0	0.374713	0	0.20436	0	0	0.391304	0	0	0	0	0	0	0.138824	0	0	0	0.218905	0	0	0	0	0	0	0.104623	0	0	0	0
lib230331_CATAGACCACTACTTT-1	0	0	0	0	0	0.104623	0	0	0	0	0	0	0	0	0	0.356557	0	0.591398	0	0	0	0.374713	0	0.20436	0	0	0.391304	0	0	0	0	0	0	0.138824	0	0	0	0.218905	0	0	0	0	0	0	0.104623	0	0	0	0
lib230331_CCGGGTATCATGACAC-1	0.17551	0.336054	0.167677	0.40202	0	0.540146	0	0.391473	0.213376	0	0.311346	0.195251	0	0.463768	0	0.565574	0.340502	0	0	0.94697	0.0827586	0.144828	0.247956	0.237057	0	0.68254	0	0.221344	0	0.349138	0.401316	0.309211	0.221176	0.0752941	0	0	0.109453	0	0	1	0.209877	0.265432	0.511565	0.569697	0.540146	0.391473	0.213376	0.506596	0.463768
lib230331_CCTACGTTCCTCAGGG-1	0.17551	0.336054	0.167677	0.40202	0	0.540146	0	0.391473	0.213376	0	0.311346	0.195251	0	0.463768	0	0.565574	0.340502	0	0	0.94697	0.0827586	0.144828	0.247956	0.237057	0	0.68254	0	0.221344	0	0.349138	0.401316	0.309211	0.221176	0.0752941	0	0	0.109453	0	0	1	0.209877	0.265432	0.511565	0.569697	0.540146	0.391473	0.213376	0.506596	0.463768
lib230331_CGCAGGTCAGTGGCTC-1	0	0	0	0	0	0.104623	0	0	0	0	0	0	0	0	0	0.356557	0	0.591398	0	0	0	0.374713	0	0.20436	0	0	0.391304	0	0	0	0	0	0	0.138824	0	0	0	0.218905	0	0	0	0	0	0	0.104623	0	0	0	0
lib230331_CGCCATTAGGCCACTC-1	0	0	0	0	0	0.104623	0	0	0	0	0	0	0	0	0	0.356557	0	0.591398	0	0	0	0.374713	0	0.20436	0	0	0.391304	0	0	0	0	0	0	0.138824	0	0	0	0.218905	0	0	0	0	0	0	0.104623	0	0	0	0
lib230331_CGGCAGTCATTCTCCG-1	0.17551	0.336054	0.167677	0.40202	0	0.540146	0	0.391473	0.213376	0	0.311346	0.195251	0	0.463768	0	0.565574	0.340502	0	0	0.94697	0.0827586	0.144828	0.247956	0.237057	0	0.68254	0	0.221344	0	0.349138	0.401316	0.309211	0.221176	0.0752941	0	0	0.109453	0	0	1	0.209877	0.265432	0.511565	0.569697	0.540146	0.391473	0.213376	0.506596	0.463768
lib230331_CGTAATGAGTCACTCA-1	0.17551	0.336054	0.167677	0.40202	0	0.540146	0	0.391473	0.213376	0	0.311346	0.195251	0	0.463768	0	0.565574	0.340502	0	0	0.94697	0.0827586	0.144828	0.247956	0.237057	0	0.68254	0	0.221344	0	0.349138	0.401316	0.309211	0.221176	0.0752941	0	0	0.109453	0	0	1	0.209877	0.265432	0.511565	0.569697	0.540146	0.391473	0.213376	0.506596	0.463768
lib230331_CGTGCTTAGTGGTGAC-1	0	0	0	0	0	0.104623	0	0	0	0	0	0	0	0	0	0.356557	0	0.591398	0	0	0	0.374713	0	0.20436	0	0	0.391304	0	0	0	0	0	0	0.138824	0	0	0	0.218905	0	0	0	0	0	0	0.104623	0	0	0	0
lib230331_CGTTGGGAGTGTTCCA-1	0.17551	0.336054	0.167677	0.40202	0	0.540146	0	0.391473	0.213376	0	0.311346	0.195251	0	0.463768	0	0.565574	0.340502	0	0	0.94697	0.0827586	0.144828	0.247956	0.237057	0	0.68254	0	0.221344	0	0.349138	0.401316	0.309211	0.221176	0.0752941	0	0	0.109453	0	0	1	0.209877	0.265432	0.511565	0.569697	0.540146	0.391473	0.213376	0.506596	0.463768
lib230331_CGTTGGGGTTGGCCTG-1	0	0	0	0	0	0.104623	0	0	0	0	0	0	0	0	0	0.356557	0	0.591398	0	0	0	0.374713	0	0.20436	0	0	0.391304	0	0	0	0	0	0	0.138824	0	0	0	0.218905	0	0	0	0	0	0	0.104623	0	0	0	0
lib230331_CTAGGTACAACCCGCA-1	0	0	0	0	0	0.104623	0	0	0	0	0	0	0	0	0	0.356557	0	0.591398	0	0	0	0.374713	0	0.20436	0	0	0.391304	0	0	0	0	0	0	0.138824	0	0	0	0.218905	0	0	0	0	0	0	0.104623	0	0	0	0
lib230331_CTATCCGCAATCTCGA-1	0	0	0	0	0	0.104623	0	0	0	0	0	0	0	0	0	0.356557	0	0.591398	0	0	0	0.374713	0	0.20436	0	0	0.391304	0	0	0	0	0	0	0.138824	0	0	0	0.218905	0	0	0	0	0	0	0.104623	0	0	0	0
lib230331_CTCATCGAGTCCCAAT-1	0	0	0	0	0	0.104623	0	0	0	0	0	0	0	0	0	0.356557	0	0.591398	0	0	0	0.374713	0	0.20436	0	0	0.391304	0	0	0	0	0	0	0.138824	0	0	0	0.218905	0	0	0	0	0	0	0.104623	0	0	0	0
lib230331_CTCTCGATCTCTGACC-1	0	0	0	0	0	0.104623	0	0	0	0	0	0	0	0	0	0.356557	0	0.591398	0	0	0	0.374713	0	0.20436	0	0	0.391304	0	0	0	0	0	0	0.138824	0	0	0	0.218905	0	0	0	0	0	0	0.104623	0	0	0	0
lib230331_CTGAGGCAGATAGTGT-1	0	0	0	0	0	0.104623	0	0	0	0	0	0	0	0	0	0.356557	0	0.591398	0	0	0	0.374713	0	0.20436	0	0	0.391304	0	0	0	0	0	0	0.138824	0	0	0	0.218905	0	0	0	0	0	0	0.104623	0	0	0	0
lib230331_CTGTAGAGTGCCTAAT-1	0	0	0	0	0	0.104623	0	0	0	0	0	0	0	0	0	0.356557	0	0.591398	0	0	0	0.374713	0	0.20436	0	0	0.391304	0	0	0	0	0	0	0.138824	0	0	0	0.218905	0	0	0	0	0	0	0.104623	0	0	0	0
lib230331_GAAGGACTCCCAAGCG-1	0	0	0	0	0	0.104623	0	0	0	0	0	0	0	0	0	0.356557	0	0.591398	0	0	0	0.374713	0	0.20436	0	0	0.391304	0	0	0	0	0	0	0.138824	0	0	0	0.218905	0	0	0	0	0	0	0.104623	0	0	0	0
lib230331_GATCATGCAGACCTGC-1	0.17551	0.336054	0.167677	0.40202	0	0.540146	0	0.391473	0.213376	0	0.311346	0.195251	0	0.463768	0	0.565574	0.340502	0	0	0.94697	0.0827586	0.144828	0.247956	0.237057	0	0.68254	0	0.221344	0	0.349138	0.401316	0.309211	0.221176	0.0752941	0	0	0.109453	0	0	1	0.209877	0.265432	0.511565	0.569697	0.540146	0.391473	0.213376	0.506596	0.463768
lib230331_GCATGATAGGCTCAAG-1	0.17551	0.336054	0.167677	0.40202	0	0.540146	0	0.391473	0.213376	0	0.311346	0.195251	0	0.463768	0	0.565574	0.340502	0	0	0.94697	0.0827586	0.144828	0.247956	0.237057	0	0.68254	0	0.221344	0	0.349138	0.401316	0.309211	0.221176	0.0752941	0	0	0.109453	0	0	1	0.209877	0.265432	0.511565	0.569697	0.540146	0.391473	0.213376	0.506596	0.463768
lib230331_GCCAGTGAGACCACGA-1	0.17551	0.336054	0.167677	0.40202	0	0.540146	0	0.391473	0.213376	0	0.311346	0.195251	0	0.463768	0	0.565574	0.340502	0	0	0.94697	0.0827586	0.144828	0.247956	0.237057	0	0.68254	0	0.221344	0	0.349138	0.401316	0.309211	0.221176	0.0752941	0	0	0.109453	0	0	1	0.209877	0.265432	0.511565	0.569697	0.540146	0.391473	0.213376	0.506596	0.463768
lib230331_GGAATCTGTCATCTAG-1	0	0	0	0	0	0.104623	0	0	0	0	0	0	0	0	0	0.356557	0	0.591398	0	0	0	0.374713	0	0.20436	0	0	0.391304	0	0	0	0	0	0	0.138824	0	0	0	0.218905	0	0	0	0	0	0	0.104623	0	0	0	0
lib230331_GGAGGTACACATCCCT-1	0	0	0	0	0	0.104623	0	0	0	0	0	0	0	0	0	0.356557	0	0.591398	0	0	0	0.374713	0	0.20436	0	0	0.391304	0	0	0	0	0	0	0.138824	0	0	0	0.218905	0	0	0	0	0	0	0.104623	0	0	0	0
lib230331_GGCACGTAGGGCGAAG-1	0	0	0	0	0	0.104623	0	0	0	0	0	0	0	0	0	0.356557	0	0.591398	0	0	0	0.374713	0	0.20436	0	0	0.391304	0	0	0	0	0	0	0.138824	0	0	0	0.218905	0	0	0	0	0	0	0.104623	0	0	0	0
lib230331_GGGCTCATCGGCTCTT-1	0	0	0	0	0	0.104623	0	0	0	0	0	0	0	0	0	0.356557	0	0.591398	0	0	0	0.374713	0	0.20436	0	0	0.391304	0	0	0	0	0	0	0.138824	0	0	0	0.218905	0	0	0	0	0	0	0.104623	0	0	0	0
lib230331_GTAATCGCACAATTCG-1	0	0	0	0	0	0.104623	0	0	0	0	0	0	0	0	0	0.356557	0	0.591398	0	0	0	0.374713	0	0.20436	0	0	0.391304	0	0	0	0	0	0	0.138824	0	0	0	0.218905	0	0	0	0	0	0	0.104623	0	0	0	0
lib230331_GTCATCCCAGAACTAA-1	0	0	0	0	0	0.104623	0	0	0	0	0	0	0	0	0	0.356557	0	0.591398	0	0	0	0.374713	0	0.20436	0	0	0.391304	0	0	0	0	0	0	0.138824	0	0	0	0.218905	0	0	0	0	0	0	0.104623	0	0	0	0
lib230331_GTCCTCAGTAGTTCCA-1	0	0	0	0	0	0.104623	0	0	0	0	0	0	0	0	0	0.356557	0	0.591398	0	0	0	0.374713	0	0.20436	0	0	0.391304	0	0	0	0	0	0	0.138824	0	0	0	0.218905	0	0	0	0	0	0	0.104623	0	0	0	0
lib230331_GTTATGGCAAGATGGC-1	0	0	0	0	0	0.104623	0	0	0	0	0	0	0	0	0	0.356557	0	0.591398	0	0	0	0.374713	0	0.20436	0	0	0.391304	0	0	0	0	0	0	0.138824	0	0	0	0.218905	0	0	0	0	0	0	0.104623	0	0	0	0
lib230331_TACTTACTCTACCTTA-1	0	0	0	0	0	0.104623	0	0	0	0	0	0	0	0	0	0.356557	0	0.591398	0	0	0	0.374713	0	0.20436	0	0	0.391304	0	0	0	0	0	0	0.138824	0	0	0	0.218905	0	0	0	0	0	0	0.104623	0	0	0	0
lib230331_TAGCACAAGAGGTTTA-1	0	0	0	0	0	0.104623	0	0	0	0	0	0	0	0	0	0.356557	0	0.591398	0	0	0	0.374713	0	0.20436	0	0	0.391304	0	0	0	0	0	0	0.138824	0	0	0	0.218905	0	0	0	0	0	0	0.104623	0	0	0	0
lib230331_TCCAGAAGTATACGGG-1	0	0	0	0	0	0.104623	0	0	0	0	0	0	0	0	0	0.356557	0	0.591398	0	0	0	0.374713	0	0.20436	0	0	0.391304	0	0	0	0	0	0	0.138824	0	0	0	0.218905	0	0	0	0	0	0	0.104623	0	0	0	0
lib230331_TCCCAGTTCTGGTTGA-1	0	0	0	0	0	0.104623	0	0	0	0	0	0	0	0	0	0.356557	0	0.591398	0	0	0	0.374713	0	0.20436	0	0	0.391304	0	0	0	0	0	0	0.138824	0	0	0	0.218905	0	0	0	0	0	0	0.104623	0	0	0	0
lib230331_TCCGATCGTCTAGGTT-1	0	0	0	0	0	0.104623	0	0	0	0	0	0	0	0	0	0.356557	0	0.591398	0	0	0	0.374713	0	0.20436	0	0	0.391304	0	0	0	0	0	0	0.138824	0	0	0	0.218905	0	0	0	0	0	0	0.104623	0	0	0	0
lib230331_TCGCACTTCATTACGG-1	0	0	0	0	0	0.104623	0	0	0	0	0	0	0	0	0	0.356557	0	0.591398	0	0	0	0.374713	0	0.20436	0	0	0.391304	0	0	0	0	0	0	0.138824	0	0	0	0.218905	0	0	0	0	0	0	0.104623	0	0	0	0
lib230331_TCGGGCACATAGATGA-1	0	0	0	0	0	0.104623	0	0	0	0	0	0	0	0	0	0.356557	0	0.591398	0	0	0	0.374713	0	0.20436	0	0	0.391304	0	0	0	0	0	0	0.138824	0	0	0	0.218905	0	0	0	0	0	0	0.104623	0	0	0	0
lib230331_TCTAACTAGTATCTGC-1	0	0	0	0	0	0.104623	0	0	0	0	0	0	0	0	0	0.356557	0	0.591398	0	0	0	0.374713	0	0.20436	0	0	0.391304	0	0	0	0	0	0	0.138824	0	0	0	0.218905	0	0	0	0	0	0	0.104623	0	0	0	0
lib230331_TCTACATAGAATAACC-1	0	0	0	0	0	0.104623	0	0	0	0	0	0	0	0	0	0.356557	0	0.591398	0	0	0	0.374713	0	0.20436	0	0	0.391304	0	0	0	0	0	0	0.138824	0	0	0	0.218905	0	0	0	0	0	0	0.104623	0	0	0	0
lib230331_TGAGCATAGATGTTCC-1	0	0	0	0	0	0.104623	0	0	0	0	0	0	0	0	0	0.356557	0	0.591398	0	0	0	0.374713	0	0.20436	0	0	0.391304	0	0	0	0	0	0	0.138824	0	0	0	0.218905	0	0	0	0	0	0	0.104623	0	0	0	0
lib230331_TGAGGGACAAGGTCTT-1	0	0	0	0	0	0.104623	0	0	0	0	0	0	0	0	0	0.356557	0	0.591398	0	0	0	0.374713	0	0.20436	0	0	0.391304	0	0	0	0	0	0	0.138824	0	0	0	0.218905	0	0	0	0	0	0	0.104623	0	0	0	0
lib230331_TGCTTCGTCTCGTGAA-1	0	0	0	0	0	0.104623	0	0	0	0	0	0	0	0	0	0.356557	0	0.591398	0	0	0	0.374713	0	0.20436	0	0	0.391304	0	0	0	0	0	0	0.138824	0	0	0	0.218905	0	0	0	0	0	0	0.104623	0	0	0	0
lib230331_TTCCTTCTCTTACTGT-1	0	0	0	0	0	0.104623	0	0	0	0	0	0	0	0	0	0.356557	0	0.591398	0	0	0	0.374713	0	0.20436	0	0	0.391304	0	0	0	0	0	0	0.138824	0	0	0	0.218905	0	0	0	0	0	0	0.104623	0	0	0	0
lib2_AACCTTTAGCGACTGA-1	0	0	0	0.0989899	0	0	0	0	0	0	0	0	0	0	0	0	0	0	0	0	0	0.289655	0	0	0	0	0	0	0	0	0	0	0	0.284706	0	0.359649	0	0	0	0	0	0	0	0.0989899	0	0	0	0	0
lib2_AACCTTTTCCGCAAAT-1	0	0	0	0	0	0	0	0	0	0	0	0	0	0	0	0	0	0	0	0	0	0.103448	0	0.430518	0	0	0	0	0	0	0	0	0	0.127059	0	0	0	0	0	0	0	0	0	0	0	0	0	0	0
lib2_AACGAAATCATCACTT-1	0	0.156463	0	0.375758	0	0.367397	0	0.236434	0.11465	0	0	0.345646	0	0.237681	0	0	0	0	0	0.511364	0.144828	0	0.111717	0.408719	0	0.801587	0	0.375494	1	0	0.154605	0.161184	0	0	0	0	0	0	0	1	0.648148	0	0.156463	0.375758	0.367397	0.236434	0.11465	0.345646	0.237681
lib2_AACTTCTCAATGCAGG-1	0	0	0	0	0	0	0	0	0	0	0	0	0	0	0	0	0	0	0	0	0	0.103448	0	0.430518	0	0	0	0	0	0	0	0	0	0.127059	0	0	0	0	0	0	0	0	0	0	0	0	0	0	0
lib2_AAGAACACAACGTATC-1	0	0	0	0.0989899	0	0	0	0	0	0	0	0	0	0	0	0	0	0	0	0	0	0.289655	0	0	0	0	0	0	0	0	0	0	0	0.284706	0	0.359649	0	0	0	0	0	0	0	0.0989899	0	0	0	0	0
lib2_AAGACAACATGATGCT-1	0	0	0	0	0	0	0	0	0	0	0	0	0	0	0	0	0	0	0	0	0	0.103448	0	0.430518	0	0	0	0	0	0	0	0	0	0.127059	0	0	0	0	0	0	0	0	0	0	0	0	0	0	0
lib2_AAGACTCCACCGGTCA-1	0	0	0	0	0	0	0	0	0	0	0	0	0	0	0	0	0	0	0	0	0	0.103448	0	0.430518	0	0	0	0	0	0	0	0	0	0.127059	0	0	0	0	0	0	0	0	0	0	0	0	0	0	0
lib2_AAGCCATAGGAGCTGT-1	0	0	0	0	0	0	0	0	0	0	0	0	0	0	0	0	0	0	0	0	0	0.103448	0	0.430518	0	0	0	0	0	0	0	0	0	0.127059	0	0	0	0	0	0	0	0	0	0	0	0	0	0	0
lib2_AAGTCGTTCTTGGAAC-1	0.0761905	0	0	0.20202	0	0.107056	0	0.20155	0	0.83758	0	0.113456	0.127536	0	0	0.557377	0	0.129032	0	0	0	0.121839	0	0.678474	0.436508	0	0.442688	0	0	0.24569	0	0	0.103529	0	0	0.245614	0	0.363184	0	0	0.271605	0	0.0761905	0.20202	0.107056	0.20155	0.83758	0.113456	0.127536
lib2_AATCACGTCCTTCTAA-1	0	0	0	0	0	0	0	0	0	0	0	0	0	0	0	0	0	0	0	0	0	0.103448	0	0.430518	0	0	0	0	0	0	0	0	0	0.127059	0	0	0	0	0	0	0	0	0	0	0	0	0	0	0
lib2_AATCGACTCGTCAGAT-1	0	0	0	0	0	0	0	0	0	0	0	0	0	0	0	0	0	0	0	0	0	0.112644	0	0.675749	0	0	0	0	0	0	0	0	0	0.270588	0	0.333333	0	0	0	0	0	0	0	0	0	0	0	0	0
lib2_AATTCCTCAGTATACC-1	0	0	0	0	0	0	0	0	0	0	0	0	0	0	0	0	0	0	0	0	0	0.103448	0	0.430518	0	0	0	0	0	0	0	0	0	0.127059	0	0	0	0	0	0	0	0	0	0	0	0	0	0	0
lib2_ACAAAGATCATTCGGA-1	0	0.156463	0	0.375758	0	0.367397	0	0.236434	0.11465	0	0	0.345646	0	0.237681	0	0	0	0	0	0.511364	0.144828	0	0.111717	0.408719	0	0.801587	0	0.375494	1	0	0.154605	0.161184	0	0	0	0	0	0	0	1	0.648148	0	0.156463	0.375758	0.367397	0.236434	0.11465	0.345646	0.237681
lib2_ACAAGCTTCTCTGCCA-1	0.0761905	0	0	0.20202	0	0.107056	0	0.20155	0	0.83758	0	0.113456	0.127536	0	0	0.557377	0	0.129032	0	0	0	0.121839	0	0.678474	0.436508	0	0.442688	0	0	0.24569	0	0	0.103529	0	0	0.245614	0	0.363184	0	0	0.271605	0	0.0761905	0.20202	0.107056	0.20155	0.83758	0.113456	0.127536
lib2_ACAGAAAAGCCTCTGG-1	0	0	0	0.0989899	0	0	0	0	0	0	0	0	0	0	0	0	0	0	0	0	0	0.289655	0	0	0	0	0	0	0	0	0	0	0	0.284706	0	0.359649	0	0	0	0	0	0	0	0.0989899	0	0	0	0	0
lib2_ACATTTCCACGCACCA-1	0.0761905	0	0	0.20202	0	0.107056	0	0.20155	0	0.83758	0	0.113456	0.127536	0	0	0.557377	0	0.129032	0	0	0	0.121839	0	0.678474	0.436508	0	0.442688	0	0	0.24569	0	0	0.103529	0	0	0.245614	0	0.363184	0	0	0.271605	0	0.0761905	0.20202	0.107056	0.20155	0.83758	0.113456	0.127536
lib2_ACCCTTGTCGCTCATC-1	0	0.156463	0	0.375758	0	0.367397	0	0.236434	0.11465	0	0	0.345646	0	0.237681	0	0	0	0	0	0.511364	0.144828	0	0.111717	0.408719	0	0.801587	0	0.375494	1	0	0.154605	0.161184	0	0	0	0	0	0	0	1	0.648148	0	0.156463	0.375758	0.367397	0.236434	0.11465	0.345646	0.237681
lib2_ACCGTTCGTTTCACAG-1	0	0	0	0	0	0	0	0	0	0	0	0	0	0	0	0	0	0	0	0	0	0.112644	0	0.675749	0	0	0	0	0	0	0	0	0	0.270588	0	0.333333	0	0	0	0	0	0	0	0	0	0	0	0	0
lib2_ACCTACCGTCTGTCCT-1	0	0	0	0	0	0	0	0	0	0	0	0	0	0	0	0	0	0	0	0	0	0.103448	0	0.430518	0	0	0	0	0	0	0	0	0	0.127059	0	0	0	0	0	0	0	0	0	0	0	0	0	0	0
lib2_ACGCACGCATTACGGT-1	0	0	0	0	0	0	0	0	0	0	0	0	0	0	0	0	0	0	0	0	0	0.103448	0	0.430518	0	0	0	0	0	0	0	0	0	0.127059	0	0	0	0	0	0	0	0	0	0	0	0	0	0	0
lib2_ACGCACGGTACGACAG-1	0	0	0	0	0	0	0	0	0	0	0	0	0	0	0	0	0	0	0	0	0	0.103448	0	0.430518	0	0	0	0	0	0	0	0	0	0.127059	0	0	0	0	0	0	0	0	0	0	0	0	0	0	0
lib2_ACGTAGTAGGAGAGTA-1	0	0	0	0	0	0	0	0	0	0	0	0	0	0	0	0	0	0	0	0	0	0.103448	0	0.430518	0	0	0	0	0	0	0	0	0	0.127059	0	0	0	0	0	0	0	0	0	0	0	0	0	0	0
lib2_ACGTAGTGTGAGACCA-1	0	0	0	0	0	0	0	0	0	0	0	0	0	0	0	0	0	0	0	0	0	0.103448	0	0.430518	0	0	0	0	0	0	0	0	0	0.127059	0	0	0	0	0	0	0	0	0	0	0	0	0	0	0
lib2_ACGTCCTTCGGCTTGG-1	0	0	0	0	0	0	0	0	0	0	0	0	0	0	0	0	0	0	0	0	0	0.103448	0	0.430518	0	0	0	0	0	0	0	0	0	0.127059	0	0	0	0	0	0	0	0	0	0	0	0	0	0	0
lib2_ACTATCTTCTGTCGTC-1	0.0761905	0	0	0.20202	0	0.107056	0	0.20155	0	0.83758	0	0.113456	0.127536	0	0	0.557377	0	0.129032	0	0	0	0.121839	0	0.678474	0.436508	0	0.442688	0	0	0.24569	0	0	0.103529	0	0	0.245614	0	0.363184	0	0	0.271605	0	0.0761905	0.20202	0.107056	0.20155	0.83758	0.113456	0.127536
lib2_ACTATTCTCAGACTGT-1	0.0761905	0	0	0.20202	0	0.107056	0	0.20155	0	0.83758	0	0.113456	0.127536	0	0	0.557377	0	0.129032	0	0	0	0.121839	0	0.678474	0.436508	0	0.442688	0	0	0.24569	0	0	0.103529	0	0	0.245614	0	0.363184	0	0	0.271605	0	0.0761905	0.20202	0.107056	0.20155	0.83758	0.113456	0.127536
lib2_ACTGTCCTCTCAAAGC-1	0.0761905	0	0	0.20202	0	0.107056	0	0.20155	0	0.83758	0	0.113456	0.127536	0	0	0.557377	0	0.129032	0	0	0	0.121839	0	0.678474	0.436508	0	0.442688	0	0	0.24569	0	0	0.103529	0	0	0.245614	0	0.363184	0	0	0.271605	0	0.0761905	0.20202	0.107056	0.20155	0.83758	0.113456	0.127536
lib2_ACTTATCTCTTAGCCC-1	0.0761905	0	0	0.20202	0	0.107056	0	0.20155	0	0.83758	0	0.113456	0.127536	0	0	0.557377	0	0.129032	0	0	0	0.121839	0	0.678474	0.436508	0	0.442688	0	0	0.24569	0	0	0.103529	0	0	0.245614	0	0.363184	0	0	0.271605	0	0.0761905	0.20202	0.107056	0.20155	0.83758	0.113456	0.127536
lib2_ACTTTGTGTATCGAAA-1	0	0	0	0	0	0	0	0	0	0	0	0	0	0	0	0	0	0	0	0	0	0.112644	0	0.675749	0	0	0	0	0	0	0	0	0	0.270588	0	0.333333	0	0	0	0	0	0	0	0	0	0	0	0	0
lib2_AGAAGTAAGCGCTGAA-1	0	0	0	0	0	0	0	0	0	0	0	0	0	0	0	0	0	0	0	0	0	0.112644	0	0.675749	0	0	0	0	0	0	0	0	0	0.270588	0	0.333333	0	0	0	0	0	0	0	0	0	0	0	0	0
lib2_AGACACTAGGTGCTAG-1	0	0	0	0	0	0	0	0	0	0	0	0	0	0	0	0	0	0	0	0	0	0.103448	0	0.430518	0	0	0	0	0	0	0	0	0	0.127059	0	0	0	0	0	0	0	0	0	0	0	0	0	0	0
lib2_AGACACTTCAGGACGA-1	0	0	0	0	0	0	0	0	0	0	0	0	0	0	0	0	0	0	0	0	0	0.103448	0	0.430518	0	0	0	0	0	0	0	0	0	0.127059	0	0	0	0	0	0	0	0	0	0	0	0	0	0	0
lib2_AGACACTTCTTCACGC-1	0	0	0	0	0	0	0	0	0	0	0	0	0	0	0	0	0	0	0	0	0	0.103448	0	0.430518	0	0	0	0	0	0	0	0	0	0.127059	0	0	0	0	0	0	0	0	0	0	0	0	0	0	0
lib2_AGAGAATGTCTCACGG-1	0	0	0	0	0	0	0	0	0	0	0	0	0	0	0	0	0	0	0	0	0	0.103448	0	0.430518	0	0	0	0	0	0	0	0	0	0.127059	0	0	0	0	0	0	0	0	0	0	0	0	0	0	0
lib2_AGCATCATCACAAGAA-1	0	0	0	0.0989899	0	0	0	0	0	0	0	0	0	0	0	0	0	0	0	0	0	0.289655	0	0	0	0	0	0	0	0	0	0	0	0.284706	0	0.359649	0	0	0	0	0	0	0	0.0989899	0	0	0	0	0
lib2_AGCCAATTCCTTATCA-1	0	0	0	0.0989899	0	0	0	0	0	0	0	0	0	0	0	0	0	0	0	0	0	0.289655	0	0	0	0	0	0	0	0	0	0	0	0.284706	0	0.359649	0	0	0	0	0	0	0	0.0989899	0	0	0	0	0
lib2_AGCCACGCATGTTCAG-1	0	0	0	0	0	0	0	0	0	0	0	0	0	0	0	0	0	0	0	0	0	0.103448	0	0.430518	0	0	0	0	0	0	0	0	0	0.127059	0	0	0	0	0	0	0	0	0	0	0	0	0	0	0
lib2_AGCGATTTCCAAGGGA-1	0	0	0	0	0	0	0	0	0	0	0	0	0	0	0	0	0	0	0	0	0	0.112644	0	0.675749	0	0	0	0	0	0	0	0	0	0.270588	0	0.333333	0	0	0	0	0	0	0	0	0	0	0	0	0
lib2_AGCGTATTCTGGAAGG-1	0.0761905	0	0	0.20202	0	0.107056	0	0.20155	0	0.83758	0	0.113456	0.127536	0	0	0.557377	0	0.129032	0	0	0	0.121839	0	0.678474	0.436508	0	0.442688	0	0	0.24569	0	0	0.103529	0	0	0.245614	0	0.363184	0	0	0.271605	0	0.0761905	0.20202	0.107056	0.20155	0.83758	0.113456	0.127536
lib2_AGCTTCCCAGGTATGG-1	0	0	0	0	0	0	0	0	0	0	0	0	0	0	0	0	0	0	0	0	0	0.103448	0	0.430518	0	0	0	0	0	0	0	0	0	0.127059	0	0	0	0	0	0	0	0	0	0	0	0	0	0	0
lib2_AGCTTCCGTGTTTACG-1	0.0761905	0	0	0.20202	0	0.107056	0	0.20155	0	0.83758	0	0.113456	0.127536	0	0	0.557377	0	0.129032	0	0	0	0.121839	0	0.678474	0.436508	0	0.442688	0	0	0.24569	0	0	0.103529	0	0	0.245614	0	0.363184	0	0	0.271605	0	0.0761905	0.20202	0.107056	0.20155	0.83758	0.113456	0.127536
lib2_AGGATCTTCTTCTCAA-1	0.0761905	0	0	0.20202	0	0.107056	0	0.20155	0	0.83758	0	0.113456	0.127536	0	0	0.557377	0	0.129032	0	0	0	0.121839	0	0.678474	0.436508	0	0.442688	0	0	0.24569	0	0	0.103529	0	0	0.245614	0	0.363184	0	0	0.271605	0	0.0761905	0.20202	0.107056	0.20155	0.83758	0.113456	0.127536
lib2_AGGCTGCTCTCTCAAT-1	0.282993	0.159184	0.0767677	0.551515	0	0.472019	0	0.666667	0.382166	0.187898	0.134565	0.567282	0	0.553623	0	0.688525	0.376344	0.272401	0	0.939394	0.441379	0	0.106267	0.700272	0	0.666667	0	0.573123	0	0.392241	0.565789	0	0.36	0.0729412	0	0.815789	0.124378	0.38806	0	1	0.598765	0	0.442177	0.628283	0.472019	0.666667	0.570064	0.701847	0.553623
lib2_AGGGTTTGTGGCGTAA-1	0	0	0	0	0	0	0	0	0	0	0	0	0	0	0	0	0	0	0	0	0	0.103448	0	0.430518	0	0	0	0	0	0	0	0	0	0.127059	0	0	0	0	0	0	0	0	0	0	0	0	0	0	0
lib2_AGGTCTATCCTTATGT-1	0.0761905	0	0	0.20202	0	0.107056	0	0.20155	0	0.83758	0	0.113456	0.127536	0	0	0.557377	0	0.129032	0	0	0	0.121839	0	0.678474	0.436508	0	0.442688	0	0	0.24569	0	0	0.103529	0	0	0.245614	0	0.363184	0	0	0.271605	0	0.0761905	0.20202	0.107056	0.20155	0.83758	0.113456	0.127536
lib2_AGGTTACCAGAGATGC-1	0	0	0	0	0	0	0	0	0	0	0	0	0	0	0	0	0	0	0	0	0	0.112644	0	0.675749	0	0	0	0	0	0	0	0	0	0.270588	0	0.333333	0	0	0	0	0	0	0	0	0	0	0	0	0
lib2_AGGTTACTCTATCGCC-1	0	0.156463	0	0.375758	0	0.367397	0	0.236434	0.11465	0	0	0.345646	0	0.237681	0	0	0	0	0	0.511364	0.144828	0	0.111717	0.408719	0	0.801587	0	0.375494	1	0	0.154605	0.161184	0	0	0	0	0	0	0	1	0.648148	0	0.156463	0.375758	0.367397	0.236434	0.11465	0.345646	0.237681
lib2_AGGTTGTTCCTATTTG-1	0	0.156463	0	0.375758	0	0.367397	0	0.236434	0.11465	0	0	0.345646	0	0.237681	0	0	0	0	0	0.511364	0.144828	0	0.111717	0.408719	0	0.801587	0	0.375494	1	0	0.154605	0.161184	0	0	0	0	0	0	0	1	0.648148	0	0.156463	0.375758	0.367397	0.236434	0.11465	0.345646	0.237681
lib2_AGTGCCGAGCGATTCT-1	0	0	0	0	0	0	0	0	0	0	0	0	0	0	0	0	0	0	0	0	0	0.103448	0	0.430518	0	0	0	0	0	0	0	0	0	0.127059	0	0	0	0	0	0	0	0	0	0	0	0	0	0	0
lib2_AGTGTTGAGTCAGAGC-1	0	0	0	0	0	0	0	0	0	0	0	0	0	0	0	0	0	0	0	0	0	0.112644	0	0.675749	0	0	0	0	0	0	0	0	0	0.270588	0	0.333333	0	0	0	0	0	0	0	0	0	0	0	0	0
lib2_ATACTTCGTGTAAATG-1	0	0	0	0	0	0	0	0	0	0	0	0	0	0	0	0	0	0	0	0	0	0.103448	0	0.430518	0	0	0	0	0	0	0	0	0	0.127059	0	0	0	0	0	0	0	0	0	0	0	0	0	0	0
lib2_ATAGGCTAGACCATGG-1	0	0	0	0.0989899	0	0	0	0	0	0	0	0	0	0	0	0	0	0	0	0	0	0.289655	0	0	0	0	0	0	0	0	0	0	0	0.284706	0	0.359649	0	0	0	0	0	0	0	0.0989899	0	0	0	0	0
lib2_ATCACAGCAGAACTCT-1	0	0	0	0.0989899	0	0	0	0	0	0	0	0	0	0	0	0	0	0	0	0	0	0.289655	0	0	0	0	0	0	0	0	0	0	0	0.284706	0	0.359649	0	0	0	0	0	0	0	0.0989899	0	0	0	0	0
lib2_ATCAGGTAGGTTCACT-1	0.282993	0.159184	0.0767677	0.551515	0	0.472019	0	0.666667	0.382166	0.187898	0.134565	0.567282	0	0.553623	0	0.688525	0.376344	0.272401	0	0.939394	0.441379	0	0.106267	0.700272	0	0.666667	0	0.573123	0	0.392241	0.565789	0	0.36	0.0729412	0	0.815789	0.124378	0.38806	0	1	0.598765	0	0.442177	0.628283	0.472019	0.666667	0.570064	0.701847	0.553623
lib2_ATCCACCGTTTCACAG-1	0.282993	0.159184	0.0767677	0.551515	0	0.472019	0	0.666667	0.382166	0.187898	0.134565	0.567282	0	0.553623	0	0.688525	0.376344	0.272401	0	0.939394	0.441379	0	0.106267	0.700272	0	0.666667	0	0.573123	0	0.392241	0.565789	0	0.36	0.0729412	0	0.815789	0.124378	0.38806	0	1	0.598765	0	0.442177	0.628283	0.472019	0.666667	0.570064	0.701847	0.553623
lib2_ATCCGTCAGCCTGTGC-1	0	0	0	0	0	0	0	0	0	0	0	0	0	0	0	0	0	0	0	0	0	0.103448	0	0.430518	0	0	0	0	0	0	0	0	0	0.127059	0	0	0	0	0	0	0	0	0	0	0	0	0	0	0
lib2_ATCCGTCGTCTACTGA-1	0	0	0	0	0	0	0	0	0	0	0	0	0	0	0	0	0	0	0	0	0	0.103448	0	0.430518	0	0	0	0	0	0	0	0	0	0.127059	0	0	0	0	0	0	0	0	0	0	0	0	0	0	0
lib2_ATCGATGTCCTCACGT-1	0	0	0	0	0	0	0	0	0	0	0	0	0	0	0	0	0	0	0	0	0	0.103448	0	0.430518	0	0	0	0	0	0	0	0	0	0.127059	0	0	0	0	0	0	0	0	0	0	0	0	0	0	0
lib2_ATGACCAGTCGTGGTC-1	0	0	0	0	0	0	0	0	0	0	0	0	0	0	0	0	0	0	0	0	0	0.103448	0	0.430518	0	0	0	0	0	0	0	0	0	0.127059	0	0	0	0	0	0	0	0	0	0	0	0	0	0	0
lib2_ATGGAGGCACGTATAC-1	0	0	0	0	0	0	0	0	0	0	0	0	0	0	0	0	0	0	0	0	0	0.112644	0	0.675749	0	0	0	0	0	0	0	0	0	0.270588	0	0.333333	0	0	0	0	0	0	0	0	0	0	0	0	0
lib2_ATTACCTTCGAAGGAC-1	0	0.156463	0	0.375758	0	0.367397	0	0.236434	0.11465	0	0	0.345646	0	0.237681	0	0	0	0	0	0.511364	0.144828	0	0.111717	0.408719	0	0.801587	0	0.375494	1	0	0.154605	0.161184	0	0	0	0	0	0	0	1	0.648148	0	0.156463	0.375758	0.367397	0.236434	0.11465	0.345646	0.237681
lib2_ATTACTCAGACGACTG-1	0	0	0	0.0989899	0	0	0	0	0	0	0	0	0	0	0	0	0	0	0	0	0	0.289655	0	0	0	0	0	0	0	0	0	0	0	0.284706	0	0.359649	0	0	0	0	0	0	0	0.0989899	0	0	0	0	0
lib2_ATTCACTCATCCTTGC-1	0.0761905	0	0	0.20202	0	0.107056	0	0.20155	0	0.83758	0	0.113456	0.127536	0	0	0.557377	0	0.129032	0	0	0	0.121839	0	0.678474	0.436508	0	0.442688	0	0	0.24569	0	0	0.103529	0	0	0.245614	0	0.363184	0	0	0.271605	0	0.0761905	0.20202	0.107056	0.20155	0.83758	0.113456	0.127536
lib2_ATTCAGGCACGAGAAC-1	0.0761905	0	0	0.20202	0	0.107056	0	0.20155	0	0.83758	0	0.113456	0.127536	0	0	0.557377	0	0.129032	0	0	0	0.121839	0	0.678474	0.436508	0	0.442688	0	0	0.24569	0	0	0.103529	0	0	0.245614	0	0.363184	0	0	0.271605	0	0.0761905	0.20202	0.107056	0.20155	0.83758	0.113456	0.127536
lib2_ATTCCATGTTAATCGC-1	0	0	0	0	0	0	0	0	0	0	0	0	0	0	0	0	0	0	0	0	0	0.103448	0	0.430518	0	0	0	0	0	0	0	0	0	0.127059	0	0	0	0	0	0	0	0	0	0	0	0	0	0	0
lib2_ATTCTTGAGGATTTGA-1	0	0.156463	0	0.375758	0	0.367397	0	0.236434	0.11465	0	0	0.345646	0	0.237681	0	0	0	0	0	0.511364	0.144828	0	0.111717	0.408719	0	0.801587	0	0.375494	1	0	0.154605	0.161184	0	0	0	0	0	0	0	1	0.648148	0	0.156463	0.375758	0.367397	0.236434	0.11465	0.345646	0.237681
lib2_CAACAGTGTTCACGAT-1	0.282993	0.159184	0.0767677	0.551515	0	0.472019	0	0.666667	0.382166	0.187898	0.134565	0.567282	0	0.553623	0	0.688525	0.376344	0.272401	0	0.939394	0.441379	0	0.106267	0.700272	0	0.666667	0	0.573123	0	0.392241	0.565789	0	0.36	0.0729412	0	0.815789	0.124378	0.38806	0	1	0.598765	0	0.442177	0.628283	0.472019	0.666667	0.570064	0.701847	0.553623
lib2_CAACCTCCAGCTGAGA-1	0	0.156463	0	0.375758	0	0.367397	0	0.236434	0.11465	0	0	0.345646	0	0.237681	0	0	0	0	0	0.511364	0.144828	0	0.111717	0.408719	0	0.801587	0	0.375494	1	0	0.154605	0.161184	0	0	0	0	0	0	0	1	0.648148	0	0.156463	0.375758	0.367397	0.236434	0.11465	0.345646	0.237681
lib2_CAACCTCCATCGATAC-1	0	0.156463	0	0.375758	0	0.367397	0	0.236434	0.11465	0	0	0.345646	0	0.237681	0	0	0	0	0	0.511364	0.144828	0	0.111717	0.408719	0	0.801587	0	0.375494	1	0	0.154605	0.161184	0	0	0	0	0	0	0	1	0.648148	0	0.156463	0.375758	0.367397	0.236434	0.11465	0.345646	0.237681
lib2_CAACGATGTTCACGAT-1	0	0.156463	0	0.375758	0	0.367397	0	0.236434	0.11465	0	0	0.345646	0	0.237681	0	0	0	0	0	0.511364	0.144828	0	0.111717	0.408719	0	0.801587	0	0.375494	1	0	0.154605	0.161184	0	0	0	0	0	0	0	1	0.648148	0	0.156463	0.375758	0.367397	0.236434	0.11465	0.345646	0.237681
lib2_CAAGCTACATCGTTCC-1	0	0	0	0.0989899	0	0	0	0	0	0	0	0	0	0	0	0	0	0	0	0	0	0.289655	0	0	0	0	0	0	0	0	0	0	0	0.284706	0	0.359649	0	0	0	0	0	0	0	0.0989899	0	0	0	0	0
lib2_CAATGACCAAGTGACG-1	0.0761905	0	0	0.20202	0	0.107056	0	0.20155	0	0.83758	0	0.113456	0.127536	0	0	0.557377	0	0.129032	0	0	0	0.121839	0	0.678474	0.436508	0	0.442688	0	0	0.24569	0	0	0.103529	0	0	0.245614	0	0.363184	0	0	0.271605	0	0.0761905	0.20202	0.107056	0.20155	0.83758	0.113456	0.127536
lib2_CAATTTCTCGAGAAAT-1	0	0	0	0	0	0	0	0	0	0	0	0	0	0	0	0	0	0	0	0	0	0.103448	0	0.430518	0	0	0	0	0	0	0	0	0	0.127059	0	0	0	0	0	0	0	0	0	0	0	0	0	0	0
lib2_CACACAATCGAAGCAG-1	0	0	0	0	0	0	0	0	0	0	0	0	0	0	0	0	0	0	0	0	0	0.103448	0	0.430518	0	0	0	0	0	0	0	0	0	0.127059	0	0	0	0	0	0	0	0	0	0	0	0	0	0	0
lib2_CACAGATGTGCAATGG-1	0	0	0	0.0989899	0	0	0	0	0	0	0	0	0	0	0	0	0	0	0	0	0	0.289655	0	0	0	0	0	0	0	0	0	0	0	0.284706	0	0.359649	0	0	0	0	0	0	0	0.0989899	0	0	0	0	0
lib2_CACGAATTCCGAGTGC-1	0	0	0	0	0	0	0	0	0	0	0	0	0	0	0	0	0	0	0	0	0	0.112644	0	0.675749	0	0	0	0	0	0	0	0	0	0.270588	0	0.333333	0	0	0	0	0	0	0	0	0	0	0	0	0
lib2_CACGGGTTCCGTGTGG-1	0	0	0	0	0	0	0	0	0	0	0	0	0	0	0	0	0	0	0	0	0	0.112644	0	0.675749	0	0	0	0	0	0	0	0	0	0.270588	0	0.333333	0	0	0	0	0	0	0	0	0	0	0	0	0
lib2_CACGTGGAGCATTTGC-1	0	0	0	0	0	0	0	0	0	0	0	0	0	0	0	0	0	0	0	0	0	0.103448	0	0.430518	0	0	0	0	0	0	0	0	0	0.127059	0	0	0	0	0	0	0	0	0	0	0	0	0	0	0
lib2_CACTAAGCACCTATCC-1	0	0	0	0	0	0	0	0	0	0	0	0	0	0	0	0	0	0	0	0	0	0.103448	0	0.430518	0	0	0	0	0	0	0	0	0	0.127059	0	0	0	0	0	0	0	0	0	0	0	0	0	0	0
lib2_CACTGAAGTGGTCTCG-1	0	0	0	0	0	0	0	0	0	0	0	0	0	0	0	0	0	0	0	0	0	0.103448	0	0.430518	0	0	0	0	0	0	0	0	0	0.127059	0	0	0	0	0	0	0	0	0	0	0	0	0	0	0
lib2_CACTGGGTCCATGCAA-1	0.0761905	0	0	0.20202	0	0.107056	0	0.20155	0	0.83758	0	0.113456	0.127536	0	0	0.557377	0	0.129032	0	0	0	0.121839	0	0.678474	0.436508	0	0.442688	0	0	0.24569	0	0	0.103529	0	0	0.245614	0	0.363184	0	0	0.271605	0	0.0761905	0.20202	0.107056	0.20155	0.83758	0.113456	0.127536
lib2_CACTGGGTCGAGGCAA-1	0	0	0	0	0	0	0	0	0	0	0	0	0	0	0	0	0	0	0	0	0	0.103448	0	0.430518	0	0	0	0	0	0	0	0	0	0.127059	0	0	0	0	0	0	0	0	0	0	0	0	0	0	0
lib2_CACTGTCCAATCACGT-1	0.0761905	0	0	0.20202	0	0.107056	0	0.20155	0	0.83758	0	0.113456	0.127536	0	0	0.557377	0	0.129032	0	0	0	0.121839	0	0.678474	0.436508	0	0.442688	0	0	0.24569	0	0	0.103529	0	0	0.245614	0	0.363184	0	0	0.271605	0	0.0761905	0.20202	0.107056	0.20155	0.83758	0.113456	0.127536
lib2_CACTGTCTCCATGCAA-1	0	0.156463	0	0.375758	0	0.367397	0	0.236434	0.11465	0	0	0.345646	0	0.237681	0	0	0	0	0	0.511364	0.144828	0	0.111717	0.408719	0	0.801587	0	0.375494	1	0	0.154605	0.161184	0	0	0	0	0	0	0	1	0.648148	0	0.156463	0.375758	0.367397	0.236434	0.11465	0.345646	0.237681
lib2_CAGATCAAGGAGTATT-1	0	0	0	0	0	0	0	0	0	0	0	0	0	0	0	0	0	0	0	0	0	0.103448	0	0.430518	0	0	0	0	0	0	0	0	0	0.127059	0	0	0	0	0	0	0	0	0	0	0	0	0	0	0
lib2_CAGCAATGTTGTCTAG-1	0	0.156463	0	0.375758	0	0.367397	0	0.236434	0.11465	0	0	0.345646	0	0.237681	0	0	0	0	0	0.511364	0.144828	0	0.111717	0.408719	0	0.801587	0	0.375494	1	0	0.154605	0.161184	0	0	0	0	0	0	0	1	0.648148	0	0.156463	0.375758	0.367397	0.236434	0.11465	0.345646	0.237681
lib2_CAGCCAGGTTGCTTGA-1	0	0.156463	0	0.375758	0	0.367397	0	0.236434	0.11465	0	0	0.345646	0	0.237681	0	0	0	0	0	0.511364	0.144828	0	0.111717	0.408719	0	0.801587	0	0.375494	1	0	0.154605	0.161184	0	0	0	0	0	0	0	1	0.648148	0	0.156463	0.375758	0.367397	0.236434	0.11465	0.345646	0.237681
lib2_CAGCCAGTCTCTCGAC-1	0	0	0	0.0989899	0	0	0	0	0	0	0	0	0	0	0	0	0	0	0	0	0	0.289655	0	0	0	0	0	0	0	0	0	0	0	0.284706	0	0.359649	0	0	0	0	0	0	0	0.0989899	0	0	0	0	0
lib2_CAGTTAGTCTTGCGCT-1	0.0761905	0	0	0.20202	0	0.107056	0	0.20155	0	0.83758	0	0.113456	0.127536	0	0	0.557377	0	0.129032	0	0	0	0.121839	0	0.678474	0.436508	0	0.442688	0	0	0.24569	0	0	0.103529	0	0	0.245614	0	0.363184	0	0	0.271605	0	0.0761905	0.20202	0.107056	0.20155	0.83758	0.113456	0.127536
lib2_CATAAGCCACGTTCGG-1	0	0	0	0	0	0	0	0	0	0	0	0	0	0	0	0	0	0	0	0	0	0.103448	0	0.430518	0	0	0	0	0	0	0	0	0	0.127059	0	0	0	0	0	0	0	0	0	0	0	0	0	0	0
lib2_CATACCCAGTTGGGAC-1	0	0	0	0	0	0	0	0	0	0	0	0	0	0	0	0	0	0	0	0	0	0.103448	0	0.430518	0	0	0	0	0	0	0	0	0	0.127059	0	0	0	0	0	0	0	0	0	0	0	0	0	0	0
lib2_CATCCGTAGAGGGTGG-1	0.0761905	0	0	0.20202	0	0.107056	0	0.20155	0	0.83758	0	0.113456	0.127536	0	0	0.557377	0	0.129032	0	0	0	0.121839	0	0.678474	0.436508	0	0.442688	0	0	0.24569	0	0	0.103529	0	0	0.245614	0	0.363184	0	0	0.271605	0	0.0761905	0.20202	0.107056	0.20155	0.83758	0.113456	0.127536
lib2_CATCGCTCAATCGCGC-1	0	0	0	0.0989899	0	0	0	0	0	0	0	0	0	0	0	0	0	0	0	0	0	0.289655	0	0	0	0	0	0	0	0	0	0	0	0.284706	0	0.359649	0	0	0	0	0	0	0	0.0989899	0	0	0	0	0
lib2_CATCGGGTCTTAGCTT-1	0	0	0	0	0	0	0	0	0	0	0	0	0	0	0	0	0	0	0	0	0	0.112644	0	0.675749	0	0	0	0	0	0	0	0	0	0.270588	0	0.333333	0	0	0	0	0	0	0	0	0	0	0	0	0
lib2_CATCGTCTCCGTGTAA-1	0.0761905	0	0	0.20202	0	0.107056	0	0.20155	0	0.83758	0	0.113456	0.127536	0	0	0.557377	0	0.129032	0	0	0	0.121839	0	0.678474	0.436508	0	0.442688	0	0	0.24569	0	0	0.103529	0	0	0.245614	0	0.363184	0	0	0.271605	0	0.0761905	0.20202	0.107056	0.20155	0.83758	0.113456	0.127536
lib2_CATGAGTCATTGGCAT-1	0	0	0	0	0	0	0	0	0	0	0	0	0	0	0	0	0	0	0	0	0	0.103448	0	0.430518	0	0	0	0	0	0	0	0	0	0.127059	0	0	0	0	0	0	0	0	0	0	0	0	0	0	0
lib2_CATGCTCTCGCTGACG-1	0.0761905	0	0	0.20202	0	0.107056	0	0.20155	0	0.83758	0	0.113456	0.127536	0	0	0.557377	0	0.129032	0	0	0	0.121839	0	0.678474	0.436508	0	0.442688	0	0	0.24569	0	0	0.103529	0	0	0.245614	0	0.363184	0	0	0.271605	0	0.0761905	0.20202	0.107056	0.20155	0.83758	0.113456	0.127536
lib2_CATGGATTCCATTTGT-1	0	0	0	0	0	0	0	0	0	0	0	0	0	0	0	0	0	0	0	0	0	0.103448	0	0.430518	0	0	0	0	0	0	0	0	0	0.127059	0	0	0	0	0	0	0	0	0	0	0	0	0	0	0
lib2_CATTCATGTTAGGCTT-1	0	0	0	0	0	0	0	0	0	0	0	0	0	0	0	0	0	0	0	0	0	0.103448	0	0.430518	0	0	0	0	0	0	0	0	0	0.127059	0	0	0	0	0	0	0	0	0	0	0	0	0	0	0
lib2_CATTCCGTCTACGCGG-1	0	0	0	0.0989899	0	0	0	0	0	0	0	0	0	0	0	0	0	0	0	0	0	0.289655	0	0	0	0	0	0	0	0	0	0	0	0.284706	0	0.359649	0	0	0	0	0	0	0	0.0989899	0	0	0	0	0
lib2_CATTGTTGTACGATTC-1	0.282993	0.159184	0.0767677	0.551515	0	0.472019	0	0.666667	0.382166	0.187898	0.134565	0.567282	0	0.553623	0	0.688525	0.376344	0.272401	0	0.939394	0.441379	0	0.106267	0.700272	0	0.666667	0	0.573123	0	0.392241	0.565789	0	0.36	0.0729412	0	0.815789	0.124378	0.38806	0	1	0.598765	0	0.442177	0.628283	0.472019	0.666667	0.570064	0.701847	0.553623
lib2_CATTGTTGTCGAACGA-1	0	0.156463	0	0.375758	0	0.367397	0	0.236434	0.11465	0	0	0.345646	0	0.237681	0	0	0	0	0	0.511364	0.144828	0	0.111717	0.408719	0	0.801587	0	0.375494	1	0	0.154605	0.161184	0	0	0	0	0	0	0	1	0.648148	0	0.156463	0.375758	0.367397	0.236434	0.11465	0.345646	0.237681
lib2_CCACGTTAGATCCTAC-1	0	0	0	0	0	0	0	0	0	0	0	0	0	0	0	0	0	0	0	0	0	0.112644	0	0.675749	0	0	0	0	0	0	0	0	0	0.270588	0	0.333333	0	0	0	0	0	0	0	0	0	0	0	0	0
lib2_CCATAAGCATCAGCAT-1	0	0	0	0.0989899	0	0	0	0	0	0	0	0	0	0	0	0	0	0	0	0	0	0.289655	0	0	0	0	0	0	0	0	0	0	0	0.284706	0	0.359649	0	0	0	0	0	0	0	0.0989899	0	0	0	0	0
lib2_CCATAAGCATGTGCTA-1	0	0	0	0	0	0	0	0	0	0	0	0	0	0	0	0	0	0	0	0	0	0.103448	0	0.430518	0	0	0	0	0	0	0	0	0	0.127059	0	0	0	0	0	0	0	0	0	0	0	0	0	0	0
lib2_CCATCACCAACAAGTA-1	0.0761905	0	0	0.20202	0	0.107056	0	0.20155	0	0.83758	0	0.113456	0.127536	0	0	0.557377	0	0.129032	0	0	0	0.121839	0	0.678474	0.436508	0	0.442688	0	0	0.24569	0	0	0.103529	0	0	0.245614	0	0.363184	0	0	0.271605	0	0.0761905	0.20202	0.107056	0.20155	0.83758	0.113456	0.127536
lib2_CCCATTGAGAGTTGTA-1	0	0	0	0	0	0	0	0	0	0	0	0	0	0	0	0	0	0	0	0	0	0.103448	0	0.430518	0	0	0	0	0	0	0	0	0	0.127059	0	0	0	0	0	0	0	0	0	0	0	0	0	0	0
lib2_CCCTCAATCGATCCCT-1	0	0	0	0	0	0	0	0	0	0	0	0	0	0	0	0	0	0	0	0	0	0.112644	0	0.675749	0	0	0	0	0	0	0	0	0	0.270588	0	0.333333	0	0	0	0	0	0	0	0	0	0	0	0	0
lib2_CCGATGGTCTGGAAGG-1	0	0	0	0	0	0	0	0	0	0	0	0	0	0	0	0	0	0	0	0	0	0.103448	0	0.430518	0	0	0	0	0	0	0	0	0	0.127059	0	0	0	0	0	0	0	0	0	0	0	0	0	0	0
lib2_CCGGGTATCACTTGGA-1	0	0	0	0	0	0	0	0	0	0	0	0	0	0	0	0	0	0	0	0	0	0.112644	0	0.675749	0	0	0	0	0	0	0	0	0	0.270588	0	0.333333	0	0	0	0	0	0	0	0	0	0	0	0	0
lib2_CCGGTGACAGTTGTCA-1	0	0	0	0.0989899	0	0	0	0	0	0	0	0	0	0	0	0	0	0	0	0	0	0.289655	0	0	0	0	0	0	0	0	0	0	0	0.284706	0	0.359649	0	0	0	0	0	0	0	0.0989899	0	0	0	0	0
lib2_CCTAACCGTTGCATCA-1	0	0	0	0	0	0	0	0	0	0	0	0	0	0	0	0	0	0	0	0	0	0.103448	0	0.430518	0	0	0	0	0	0	0	0	0	0.127059	0	0	0	0	0	0	0	0	0	0	0	0	0	0	0
lib2_CCTAACCTCCGCTAGG-1	0	0	0	0.0989899	0	0	0	0	0	0	0	0	0	0	0	0	0	0	0	0	0	0.289655	0	0	0	0	0	0	0	0	0	0	0	0.284706	0	0.359649	0	0	0	0	0	0	0	0.0989899	0	0	0	0	0
lib2_CCTAAGAAGCCGTAAG-1	0	0	0	0	0	0	0	0	0	0	0	0	0	0	0	0	0	0	0	0	0	0.103448	0	0.430518	0	0	0	0	0	0	0	0	0	0.127059	0	0	0	0	0	0	0	0	0	0	0	0	0	0	0
lib2_CCTAAGAGTTATTCCT-1	0	0	0	0.0989899	0	0	0	0	0	0	0	0	0	0	0	0	0	0	0	0	0	0.289655	0	0	0	0	0	0	0	0	0	0	0	0.284706	0	0.359649	0	0	0	0	0	0	0	0.0989899	0	0	0	0	0
lib2_CCTCAACGTGCTGCAC-1	0.282993	0.159184	0.0767677	0.551515	0	0.472019	0	0.666667	0.382166	0.187898	0.134565	0.567282	0	0.553623	0	0.688525	0.376344	0.272401	0	0.939394	0.441379	0	0.106267	0.700272	0	0.666667	0	0.573123	0	0.392241	0.565789	0	0.36	0.0729412	0	0.815789	0.124378	0.38806	0	1	0.598765	0	0.442177	0.628283	0.472019	0.666667	0.570064	0.701847	0.553623
lib2_CCTCAGTCAAGCTCTA-1	0	0	0	0	0	0	0	0	0	0	0	0	0	0	0	0	0	0	0	0	0	0.103448	0	0.430518	0	0	0	0	0	0	0	0	0	0.127059	0	0	0	0	0	0	0	0	0	0	0	0	0	0	0
lib2_CCTCAGTGTGGCTTGC-1	0	0	0	0	0	0	0	0	0	0	0	0	0	0	0	0	0	0	0	0	0	0.112644	0	0.675749	0	0	0	0	0	0	0	0	0	0.270588	0	0.333333	0	0	0	0	0	0	0	0	0	0	0	0	0
lib2_CCTCAGTTCTCGAGTA-1	0	0.156463	0	0.375758	0	0.367397	0	0.236434	0.11465	0	0	0.345646	0	0.237681	0	0	0	0	0	0.511364	0.144828	0	0.111717	0.408719	0	0.801587	0	0.375494	1	0	0.154605	0.161184	0	0	0	0	0	0	0	1	0.648148	0	0.156463	0.375758	0.367397	0.236434	0.11465	0.345646	0.237681
lib2_CCTCATGTCGCATGAT-1	0	0	0	0	0	0	0	0	0	0	0	0	0	0	0	0	0	0	0	0	0	0.103448	0	0.430518	0	0	0	0	0	0	0	0	0	0.127059	0	0	0	0	0	0	0	0	0	0	0	0	0	0	0
lib2_CCTGCATGTGGTATGG-1	0	0.156463	0	0.375758	0	0.367397	0	0.236434	0.11465	0	0	0.345646	0	0.237681	0	0	0	0	0	0.511364	0.144828	0	0.111717	0.408719	0	0.801587	0	0.375494	1	0	0.154605	0.161184	0	0	0	0	0	0	0	1	0.648148	0	0.156463	0.375758	0.367397	0.236434	0.11465	0.345646	0.237681
lib2_CCTGCATTCTACTATC-1	0	0	0	0	0	0	0	0	0	0	0	0	0	0	0	0	0	0	0	0	0	0.112644	0	0.675749	0	0	0	0	0	0	0	0	0	0.270588	0	0.333333	0	0	0	0	0	0	0	0	0	0	0	0	0
lib2_CCTGTTGAGCGAATGC-1	0	0.156463	0	0.375758	0	0.367397	0	0.236434	0.11465	0	0	0.345646	0	0.237681	0	0	0	0	0	0.511364	0.144828	0	0.111717	0.408719	0	0.801587	0	0.375494	1	0	0.154605	0.161184	0	0	0	0	0	0	0	1	0.648148	0	0.156463	0.375758	0.367397	0.236434	0.11465	0.345646	0.237681
lib2_CCTTGTGGTGGACTGA-1	0	0	0	0	0	0	0	0	0	0	0	0	0	0	0	0	0	0	0	0	0	0.112644	0	0.675749	0	0	0	0	0	0	0	0	0	0.270588	0	0.333333	0	0	0	0	0	0	0	0	0	0	0	0	0
lib2_CGAAGTTTCCATCTCG-1	0	0	0	0.0989899	0	0	0	0	0	0	0	0	0	0	0	0	0	0	0	0	0	0.289655	0	0	0	0	0	0	0	0	0	0	0	0.284706	0	0.359649	0	0	0	0	0	0	0	0.0989899	0	0	0	0	0
lib2_CGATCGGCAGAAATTG-1	0	0	0	0	0	0	0	0	0	0	0	0	0	0	0	0	0	0	0	0	0	0.103448	0	0.430518	0	0	0	0	0	0	0	0	0	0.127059	0	0	0	0	0	0	0	0	0	0	0	0	0	0	0
lib2_CGATCGGGTTTCGACA-1	0	0	0	0	0	0	0	0	0	0	0	0	0	0	0	0	0	0	0	0	0	0.103448	0	0.430518	0	0	0	0	0	0	0	0	0	0.127059	0	0	0	0	0	0	0	0	0	0	0	0	0	0	0
lib2_CGATGGCCACTACTTT-1	0	0	0	0	0	0	0	0	0	0	0	0	0	0	0	0	0	0	0	0	0	0.103448	0	0.430518	0	0	0	0	0	0	0	0	0	0.127059	0	0	0	0	0	0	0	0	0	0	0	0	0	0	0
lib2_CGGCAGTCAAACTAAG-1	0.0761905	0	0	0.20202	0	0.107056	0	0.20155	0	0.83758	0	0.113456	0.127536	0	0	0.557377	0	0.129032	0	0	0	0.121839	0	0.678474	0.436508	0	0.442688	0	0	0.24569	0	0	0.103529	0	0	0.245614	0	0.363184	0	0	0.271605	0	0.0761905	0.20202	0.107056	0.20155	0.83758	0.113456	0.127536
lib2_CGGCAGTGTATCTTCT-1	0.0761905	0	0	0.20202	0	0.107056	0	0.20155	0	0.83758	0	0.113456	0.127536	0	0	0.557377	0	0.129032	0	0	0	0.121839	0	0.678474	0.436508	0	0.442688	0	0	0.24569	0	0	0.103529	0	0	0.245614	0	0.363184	0	0	0.271605	0	0.0761905	0.20202	0.107056	0.20155	0.83758	0.113456	0.127536
lib2_CGGGCATAGTACGTCT-1	0.0761905	0	0	0.20202	0	0.107056	0	0.20155	0	0.83758	0	0.113456	0.127536	0	0	0.557377	0	0.129032	0	0	0	0.121839	0	0.678474	0.436508	0	0.442688	0	0	0.24569	0	0	0.103529	0	0	0.245614	0	0.363184	0	0	0.271605	0	0.0761905	0.20202	0.107056	0.20155	0.83758	0.113456	0.127536
lib2_CGTGAATGTCACGCTG-1	0	0	0	0	0	0	0	0	0	0	0	0	0	0	0	0	0	0	0	0	0	0.103448	0	0.430518	0	0	0	0	0	0	0	0	0	0.127059	0	0	0	0	0	0	0	0	0	0	0	0	0	0	0
lib2_CGTGAATTCGTTACCC-1	0	0	0	0	0	0	0	0	0	0	0	0	0	0	0	0	0	0	0	0	0	0.112644	0	0.675749	0	0	0	0	0	0	0	0	0	0.270588	0	0.333333	0	0	0	0	0	0	0	0	0	0	0	0	0
lib2_CGTTAGAAGTATGGCG-1	0	0	0	0	0	0	0	0	0	0	0	0	0	0	0	0	0	0	0	0	0	0.103448	0	0.430518	0	0	0	0	0	0	0	0	0	0.127059	0	0	0	0	0	0	0	0	0	0	0	0	0	0	0
lib2_CTACAGACACACCTTC-1	0	0	0	0.0989899	0	0	0	0	0	0	0	0	0	0	0	0	0	0	0	0	0	0.289655	0	0	0	0	0	0	0	0	0	0	0	0.284706	0	0.359649	0	0	0	0	0	0	0	0.0989899	0	0	0	0	0
lib2_CTACTATAGCGGTAAC-1	0	0	0	0	0	0	0	0	0	0	0	0	0	0	0	0	0	0	0	0	0	0.103448	0	0.430518	0	0	0	0	0	0	0	0	0	0.127059	0	0	0	0	0	0	0	0	0	0	0	0	0	0	0
lib2_CTAGGTAAGAATTGCA-1	0	0	0	0	0	0	0	0	0	0	0	0	0	0	0	0	0	0	0	0	0	0.103448	0	0.430518	0	0	0	0	0	0	0	0	0	0.127059	0	0	0	0	0	0	0	0	0	0	0	0	0	0	0
lib2_CTATCTAGTCGCATCG-1	0.0761905	0	0	0.20202	0	0.107056	0	0.20155	0	0.83758	0	0.113456	0.127536	0	0	0.557377	0	0.129032	0	0	0	0.121839	0	0.678474	0.436508	0	0.442688	0	0	0.24569	0	0	0.103529	0	0	0.245614	0	0.363184	0	0	0.271605	0	0.0761905	0.20202	0.107056	0.20155	0.83758	0.113456	0.127536
lib2_CTATCTATCAGAGTGG-1	0	0	0	0	0	0	0	0	0	0	0	0	0	0	0	0	0	0	0	0	0	0.103448	0	0.430518	0	0	0	0	0	0	0	0	0	0.127059	0	0	0	0	0	0	0	0	0	0	0	0	0	0	0
lib2_CTCAATTCAAGCACCC-1	0	0.156463	0	0.375758	0	0.367397	0	0.236434	0.11465	0	0	0.345646	0	0.237681	0	0	0	0	0	0.511364	0.144828	0	0.111717	0.408719	0	0.801587	0	0.375494	1	0	0.154605	0.161184	0	0	0	0	0	0	0	1	0.648148	0	0.156463	0.375758	0.367397	0.236434	0.11465	0.345646	0.237681
lib2_CTCAATTGTATCAAGA-1	0	0	0	0	0	0	0	0	0	0	0	0	0	0	0	0	0	0	0	0	0	0.103448	0	0.430518	0	0	0	0	0	0	0	0	0	0.127059	0	0	0	0	0	0	0	0	0	0	0	0	0	0	0
lib2_CTCCAACAGCGGGTAT-1	0	0	0	0	0	0	0	0	0	0	0	0	0	0	0	0	0	0	0	0	0	0.103448	0	0.430518	0	0	0	0	0	0	0	0	0	0.127059	0	0	0	0	0	0	0	0	0	0	0	0	0	0	0
lib2_CTCCACAAGGTCACTT-1	0	0.156463	0	0.375758	0	0.367397	0	0.236434	0.11465	0	0	0.345646	0	0.237681	0	0	0	0	0	0.511364	0.144828	0	0.111717	0.408719	0	0.801587	0	0.375494	1	0	0.154605	0.161184	0	0	0	0	0	0	0	1	0.648148	0	0.156463	0.375758	0.367397	0.236434	0.11465	0.345646	0.237681
lib2_CTCCATGTCAGACATC-1	0	0	0	0	0	0	0	0	0	0	0	0	0	0	0	0	0	0	0	0	0	0.112644	0	0.675749	0	0	0	0	0	0	0	0	0	0.270588	0	0.333333	0	0	0	0	0	0	0	0	0	0	0	0	0
lib2_CTCCCAATCGGTCGAC-1	0	0	0	0	0	0	0	0	0	0	0	0	0	0	0	0	0	0	0	0	0	0.103448	0	0.430518	0	0	0	0	0	0	0	0	0	0.127059	0	0	0	0	0	0	0	0	0	0	0	0	0	0	0
lib2_CTCCCAATCTCAGAAC-1	0.282993	0.159184	0.0767677	0.551515	0	0.472019	0	0.666667	0.382166	0.187898	0.134565	0.567282	0	0.553623	0	0.688525	0.376344	0.272401	0	0.939394	0.441379	0	0.106267	0.700272	0	0.666667	0	0.573123	0	0.392241	0.565789	0	0.36	0.0729412	0	0.815789	0.124378	0.38806	0	1	0.598765	0	0.442177	0.628283	0.472019	0.666667	0.570064	0.701847	0.553623
lib2_CTCTCAGCAGGGAATC-1	0	0	0	0	0	0	0	0	0	0	0	0	0	0	0	0	0	0	0	0	0	0.103448	0	0.430518	0	0	0	0	0	0	0	0	0	0.127059	0	0	0	0	0	0	0	0	0	0	0	0	0	0	0
lib2_CTGAGCGCAAATAGCA-1	0.0761905	0	0	0.20202	0	0.107056	0	0.20155	0	0.83758	0	0.113456	0.127536	0	0	0.557377	0	0.129032	0	0	0	0.121839	0	0.678474	0.436508	0	0.442688	0	0	0.24569	0	0	0.103529	0	0	0.245614	0	0.363184	0	0	0.271605	0	0.0761905	0.20202	0.107056	0.20155	0.83758	0.113456	0.127536
lib2_CTGAGGCAGACTCATC-1	0	0	0	0	0	0	0	0	0	0	0	0	0	0	0	0	0	0	0	0	0	0.103448	0	0.430518	0	0	0	0	0	0	0	0	0	0.127059	0	0	0	0	0	0	0	0	0	0	0	0	0	0	0
lib2_CTGAGGCCAAGCAGGT-1	0	0	0	0	0	0	0	0	0	0	0	0	0	0	0	0	0	0	0	0	0	0.103448	0	0.430518	0	0	0	0	0	0	0	0	0	0.127059	0	0	0	0	0	0	0	0	0	0	0	0	0	0	0
lib2_CTGATCCAGCAACCAG-1	0	0	0	0	0	0	0	0	0	0	0	0	0	0	0	0	0	0	0	0	0	0.103448	0	0.430518	0	0	0	0	0	0	0	0	0	0.127059	0	0	0	0	0	0	0	0	0	0	0	0	0	0	0
lib2_CTGCATCCACATTGTG-1	0	0	0	0	0	0	0	0	0	0	0	0	0	0	0	0	0	0	0	0	0	0.112644	0	0.675749	0	0	0	0	0	0	0	0	0	0.270588	0	0.333333	0	0	0	0	0	0	0	0	0	0	0	0	0
lib2_CTGCCATCAATCTCGA-1	0	0	0	0	0	0	0	0	0	0	0	0	0	0	0	0	0	0	0	0	0	0.103448	0	0.430518	0	0	0	0	0	0	0	0	0	0.127059	0	0	0	0	0	0	0	0	0	0	0	0	0	0	0
lib2_CTGGACGAGGATGCGT-1	0	0	0	0	0	0	0	0	0	0	0	0	0	0	0	0	0	0	0	0	0	0.112644	0	0.675749	0	0	0	0	0	0	0	0	0	0.270588	0	0.333333	0	0	0	0	0	0	0	0	0	0	0	0	0
lib2_CTGGACGGTACTAAGA-1	0	0.156463	0	0.375758	0	0.367397	0	0.236434	0.11465	0	0	0.345646	0	0.237681	0	0	0	0	0	0.511364	0.144828	0	0.111717	0.408719	0	0.801587	0	0.375494	1	0	0.154605	0.161184	0	0	0	0	0	0	0	1	0.648148	0	0.156463	0.375758	0.367397	0.236434	0.11465	0.345646	0.237681
lib2_CTGTACCGTCTAGGCC-1	0.0761905	0	0	0.20202	0	0.107056	0	0.20155	0	0.83758	0	0.113456	0.127536	0	0	0.557377	0	0.129032	0	0	0	0.121839	0	0.678474	0.436508	0	0.442688	0	0	0.24569	0	0	0.103529	0	0	0.245614	0	0.363184	0	0	0.271605	0	0.0761905	0.20202	0.107056	0.20155	0.83758	0.113456	0.127536
lib2_CTGTGGGGTCTTCATT-1	0	0	0	0	0	0	0	0	0	0	0	0	0	0	0	0	0	0	0	0	0	0.112644	0	0.675749	0	0	0	0	0	0	0	0	0	0.270588	0	0.333333	0	0	0	0	0	0	0	0	0	0	0	0	0
lib2_CTTCAATGTGATTCAC-1	0	0	0	0	0	0	0	0	0	0	0	0	0	0	0	0	0	0	0	0	0	0.103448	0	0.430518	0	0	0	0	0	0	0	0	0	0.127059	0	0	0	0	0	0	0	0	0	0	0	0	0	0	0
lib2_CTTCGGTAGTCACTAC-1	0	0	0	0	0	0	0	0	0	0	0	0	0	0	0	0	0	0	0	0	0	0.112644	0	0.675749	0	0	0	0	0	0	0	0	0	0.270588	0	0.333333	0	0	0	0	0	0	0	0	0	0	0	0	0
lib2_CTTCTCTGTGGCAACA-1	0.0761905	0	0	0.20202	0	0.107056	0	0.20155	0	0.83758	0	0.113456	0.127536	0	0	0.557377	0	0.129032	0	0	0	0.121839	0	0.678474	0.436508	0	0.442688	0	0	0.24569	0	0	0.103529	0	0	0.245614	0	0.363184	0	0	0.271605	0	0.0761905	0.20202	0.107056	0.20155	0.83758	0.113456	0.127536
lib2_GAACACTGTAGGAGGG-1	0.0761905	0	0	0.20202	0	0.107056	0	0.20155	0	0.83758	0	0.113456	0.127536	0	0	0.557377	0	0.129032	0	0	0	0.121839	0	0.678474	0.436508	0	0.442688	0	0	0.24569	0	0	0.103529	0	0	0.245614	0	0.363184	0	0	0.271605	0	0.0761905	0.20202	0.107056	0.20155	0.83758	0.113456	0.127536
lib2_GAACTGTCAATCACGT-1	0	0	0	0	0	0	0	0	0	0	0	0	0	0	0	0	0	0	0	0	0	0.103448	0	0.430518	0	0	0	0	0	0	0	0	0	0.127059	0	0	0	0	0	0	0	0	0	0	0	0	0	0	0
lib2_GAACTGTGTAATCAAG-1	0.0761905	0	0	0.20202	0	0.107056	0	0.20155	0	0.83758	0	0.113456	0.127536	0	0	0.557377	0	0.129032	0	0	0	0.121839	0	0.678474	0.436508	0	0.442688	0	0	0.24569	0	0	0.103529	0	0	0.245614	0	0.363184	0	0	0.271605	0	0.0761905	0.20202	0.107056	0.20155	0.83758	0.113456	0.127536
lib2_GACACGCAGACGGTTG-1	0	0	0	0	0	0	0	0	0	0	0	0	0	0	0	0	0	0	0	0	0	0.112644	0	0.675749	0	0	0	0	0	0	0	0	0	0.270588	0	0.333333	0	0	0	0	0	0	0	0	0	0	0	0	0
lib2_GACATCACAGCACCCA-1	0	0	0	0.0989899	0	0	0	0	0	0	0	0	0	0	0	0	0	0	0	0	0	0.289655	0	0	0	0	0	0	0	0	0	0	0	0.284706	0	0.359649	0	0	0	0	0	0	0	0.0989899	0	0	0	0	0
lib2_GACCTTCCAAGCGGAT-1	0.0761905	0	0	0.20202	0	0.107056	0	0.20155	0	0.83758	0	0.113456	0.127536	0	0	0.557377	0	0.129032	0	0	0	0.121839	0	0.678474	0.436508	0	0.442688	0	0	0.24569	0	0	0.103529	0	0	0.245614	0	0.363184	0	0	0.271605	0	0.0761905	0.20202	0.107056	0.20155	0.83758	0.113456	0.127536
lib2_GACTTCCTCCGGGACT-1	0	0	0	0	0	0	0	0	0	0	0	0	0	0	0	0	0	0	0	0	0	0.103448	0	0.430518	0	0	0	0	0	0	0	0	0	0.127059	0	0	0	0	0	0	0	0	0	0	0	0	0	0	0
lib2_GAGAAATGTCATAGTC-1	0.0761905	0	0	0.20202	0	0.107056	0	0.20155	0	0.83758	0	0.113456	0.127536	0	0	0.557377	0	0.129032	0	0	0	0.121839	0	0.678474	0.436508	0	0.442688	0	0	0.24569	0	0	0.103529	0	0	0.245614	0	0.363184	0	0	0.271605	0	0.0761905	0.20202	0.107056	0.20155	0.83758	0.113456	0.127536
lib2_GAGATGGCAATTCTTC-1	0.0761905	0	0	0.20202	0	0.107056	0	0.20155	0	0.83758	0	0.113456	0.127536	0	0	0.557377	0	0.129032	0	0	0	0.121839	0	0.678474	0.436508	0	0.442688	0	0	0.24569	0	0	0.103529	0	0	0.245614	0	0.363184	0	0	0.271605	0	0.0761905	0.20202	0.107056	0.20155	0.83758	0.113456	0.127536
lib2_GAGCTGCAGCGAGGAG-1	0	0	0	0	0	0	0	0	0	0	0	0	0	0	0	0	0	0	0	0	0	0.103448	0	0.430518	0	0	0	0	0	0	0	0	0	0.127059	0	0	0	0	0	0	0	0	0	0	0	0	0	0	0
lib2_GAGCTGCTCAGGAACG-1	0.0761905	0	0	0.20202	0	0.107056	0	0.20155	0	0.83758	0	0.113456	0.127536	0	0	0.557377	0	0.129032	0	0	0	0.121839	0	0.678474	0.436508	0	0.442688	0	0	0.24569	0	0	0.103529	0	0	0.245614	0	0.363184	0	0	0.271605	0	0.0761905	0.20202	0.107056	0.20155	0.83758	0.113456	0.127536
lib2_GAGGCAATCCTTCAGC-1	0	0	0	0	0	0	0	0	0	0	0	0	0	0	0	0	0	0	0	0	0	0.103448	0	0.430518	0	0	0	0	0	0	0	0	0	0.127059	0	0	0	0	0	0	0	0	0	0	0	0	0	0	0
lib2_GAGTCATTCGAGATGG-1	0	0	0	0	0	0	0	0	0	0	0	0	0	0	0	0	0	0	0	0	0	0.103448	0	0.430518	0	0	0	0	0	0	0	0	0	0.127059	0	0	0	0	0	0	0	0	0	0	0	0	0	0	0
lib2_GAGTTTGCAGGACAGT-1	0	0	0	0	0	0	0	0	0	0	0	0	0	0	0	0	0	0	0	0	0	0.112644	0	0.675749	0	0	0	0	0	0	0	0	0	0.270588	0	0.333333	0	0	0	0	0	0	0	0	0	0	0	0	0
lib2_GATCATGTCCGCACGA-1	0	0.156463	0	0.375758	0	0.367397	0	0.236434	0.11465	0	0	0.345646	0	0.237681	0	0	0	0	0	0.511364	0.144828	0	0.111717	0.408719	0	0.801587	0	0.375494	1	0	0.154605	0.161184	0	0	0	0	0	0	0	1	0.648148	0	0.156463	0.375758	0.367397	0.236434	0.11465	0.345646	0.237681
lib2_GATCGTAAGCTGTTAC-1	0.0761905	0	0	0.20202	0	0.107056	0	0.20155	0	0.83758	0	0.113456	0.127536	0	0	0.557377	0	0.129032	0	0	0	0.121839	0	0.678474	0.436508	0	0.442688	0	0	0.24569	0	0	0.103529	0	0	0.245614	0	0.363184	0	0	0.271605	0	0.0761905	0.20202	0.107056	0.20155	0.83758	0.113456	0.127536
lib2_GATGATCCACCCATAA-1	0	0	0	0	0	0	0	0	0	0	0	0	0	0	0	0	0	0	0	0	0	0.103448	0	0.430518	0	0	0	0	0	0	0	0	0	0.127059	0	0	0	0	0	0	0	0	0	0	0	0	0	0	0
lib2_GATGTTGCAGTTACCA-1	0	0	0	0	0	0	0	0	0	0	0	0	0	0	0	0	0	0	0	0	0	0.103448	0	0.430518	0	0	0	0	0	0	0	0	0	0.127059	0	0	0	0	0	0	0	0	0	0	0	0	0	0	0
lib2_GCAACATAGGTCTGGA-1	0	0	0	0	0	0	0	0	0	0	0	0	0	0	0	0	0	0	0	0	0	0.103448	0	0.430518	0	0	0	0	0	0	0	0	0	0.127059	0	0	0	0	0	0	0	0	0	0	0	0	0	0	0
lib2_GCAACCGCAGCTGAGA-1	0	0.156463	0	0.375758	0	0.367397	0	0.236434	0.11465	0	0	0.345646	0	0.237681	0	0	0	0	0	0.511364	0.144828	0	0.111717	0.408719	0	0.801587	0	0.375494	1	0	0.154605	0.161184	0	0	0	0	0	0	0	1	0.648148	0	0.156463	0.375758	0.367397	0.236434	0.11465	0.345646	0.237681
lib2_GCACGTGCATGGGATG-1	0	0	0	0.0989899	0	0	0	0	0	0	0	0	0	0	0	0	0	0	0	0	0	0.289655	0	0	0	0	0	0	0	0	0	0	0	0.284706	0	0.359649	0	0	0	0	0	0	0	0.0989899	0	0	0	0	0
lib2_GCACGTGGTGTCATTG-1	0	0	0	0	0	0	0	0	0	0	0	0	0	0	0	0	0	0	0	0	0	0.103448	0	0.430518	0	0	0	0	0	0	0	0	0	0.127059	0	0	0	0	0	0	0	0	0	0	0	0	0	0	0
lib2_GCAGCTGTCTTCCTAA-1	0.0761905	0	0	0.20202	0	0.107056	0	0.20155	0	0.83758	0	0.113456	0.127536	0	0	0.557377	0	0.129032	0	0	0	0.121839	0	0.678474	0.436508	0	0.442688	0	0	0.24569	0	0	0.103529	0	0	0.245614	0	0.363184	0	0	0.271605	0	0.0761905	0.20202	0.107056	0.20155	0.83758	0.113456	0.127536
lib2_GCATGATTCTGAGAGG-1	0	0	0	0	0	0	0	0	0	0	0	0	0	0	0	0	0	0	0	0	0	0.112644	0	0.675749	0	0	0	0	0	0	0	0	0	0.270588	0	0.333333	0	0	0	0	0	0	0	0	0	0	0	0	0
lib2_GCCAGGTAGTGTTGTC-1	0.0761905	0	0	0.20202	0	0.107056	0	0.20155	0	0.83758	0	0.113456	0.127536	0	0	0.557377	0	0.129032	0	0	0	0.121839	0	0.678474	0.436508	0	0.442688	0	0	0.24569	0	0	0.103529	0	0	0.245614	0	0.363184	0	0	0.271605	0	0.0761905	0.20202	0.107056	0.20155	0.83758	0.113456	0.127536
lib2_GCCAGGTCAGTAGGAC-1	0	0	0	0	0	0	0	0	0	0	0	0	0	0	0	0	0	0	0	0	0	0.103448	0	0.430518	0	0	0	0	0	0	0	0	0	0.127059	0	0	0	0	0	0	0	0	0	0	0	0	0	0	0
lib2_GCCTGTTTCGGAATGG-1	0	0	0	0	0	0	0	0	0	0	0	0	0	0	0	0	0	0	0	0	0	0.103448	0	0.430518	0	0	0	0	0	0	0	0	0	0.127059	0	0	0	0	0	0	0	0	0	0	0	0	0	0	0
lib2_GCTCAAACACAGAGAC-1	0.0761905	0	0	0.20202	0	0.107056	0	0.20155	0	0.83758	0	0.113456	0.127536	0	0	0.557377	0	0.129032	0	0	0	0.121839	0	0.678474	0.436508	0	0.442688	0	0	0.24569	0	0	0.103529	0	0	0.245614	0	0.363184	0	0	0.271605	0	0.0761905	0.20202	0.107056	0.20155	0.83758	0.113456	0.127536
lib2_GCTTGGGTCAGCAATC-1	0.0761905	0	0	0.20202	0	0.107056	0	0.20155	0	0.83758	0	0.113456	0.127536	0	0	0.557377	0	0.129032	0	0	0	0.121839	0	0.678474	0.436508	0	0.442688	0	0	0.24569	0	0	0.103529	0	0	0.245614	0	0.363184	0	0	0.271605	0	0.0761905	0.20202	0.107056	0.20155	0.83758	0.113456	0.127536
lib2_GGACGTCTCAGCGCGT-1	0	0.156463	0	0.375758	0	0.367397	0	0.236434	0.11465	0	0	0.345646	0	0.237681	0	0	0	0	0	0.511364	0.144828	0	0.111717	0.408719	0	0.801587	0	0.375494	1	0	0.154605	0.161184	0	0	0	0	0	0	0	1	0.648148	0	0.156463	0.375758	0.367397	0.236434	0.11465	0.345646	0.237681
lib2_GGAGAACGTAGGTTTC-1	0	0	0	0	0	0	0	0	0	0	0	0	0	0	0	0	0	0	0	0	0	0.103448	0	0.430518	0	0	0	0	0	0	0	0	0	0.127059	0	0	0	0	0	0	0	0	0	0	0	0	0	0	0
lib2_GGAGATGCACAAGCAG-1	0	0	0	0	0	0	0	0	0	0	0	0	0	0	0	0	0	0	0	0	0	0.103448	0	0.430518	0	0	0	0	0	0	0	0	0	0.127059	0	0	0	0	0	0	0	0	0	0	0	0	0	0	0
lib2_GGAGGATGTAGGTAGC-1	0.0761905	0	0	0.20202	0	0.107056	0	0.20155	0	0.83758	0	0.113456	0.127536	0	0	0.557377	0	0.129032	0	0	0	0.121839	0	0.678474	0.436508	0	0.442688	0	0	0.24569	0	0	0.103529	0	0	0.245614	0	0.363184	0	0	0.271605	0	0.0761905	0.20202	0.107056	0.20155	0.83758	0.113456	0.127536
lib2_GGCACGTGTTTGACAC-1	0	0	0	0	0	0	0	0	0	0	0	0	0	0	0	0	0	0	0	0	0	0.103448	0	0.430518	0	0	0	0	0	0	0	0	0	0.127059	0	0	0	0	0	0	0	0	0	0	0	0	0	0	0
lib2_GGCAGTCGTAGATCCT-1	0	0	0	0.0989899	0	0	0	0	0	0	0	0	0	0	0	0	0	0	0	0	0	0.289655	0	0	0	0	0	0	0	0	0	0	0	0.284706	0	0.359649	0	0	0	0	0	0	0	0.0989899	0	0	0	0	0
lib2_GGCTTGGTCAGGAGAC-1	0	0	0	0	0	0	0	0	0	0	0	0	0	0	0	0	0	0	0	0	0	0.103448	0	0.430518	0	0	0	0	0	0	0	0	0	0.127059	0	0	0	0	0	0	0	0	0	0	0	0	0	0	0
lib2_GGGATCCCATCGAACT-1	0	0.156463	0	0.375758	0	0.367397	0	0.236434	0.11465	0	0	0.345646	0	0.237681	0	0	0	0	0	0.511364	0.144828	0	0.111717	0.408719	0	0.801587	0	0.375494	1	0	0.154605	0.161184	0	0	0	0	0	0	0	1	0.648148	0	0.156463	0.375758	0.367397	0.236434	0.11465	0.345646	0.237681
lib2_GGGATGAGTTTGGGAG-1	0	0	0	0	0	0	0	0	0	0	0	0	0	0	0	0	0	0	0	0	0	0.103448	0	0.430518	0	0	0	0	0	0	0	0	0	0.127059	0	0	0	0	0	0	0	0	0	0	0	0	0	0	0
lib2_GGGCCATTCATAGCAC-1	0.0761905	0	0	0.20202	0	0.107056	0	0.20155	0	0.83758	0	0.113456	0.127536	0	0	0.557377	0	0.129032	0	0	0	0.121839	0	0.678474	0.436508	0	0.442688	0	0	0.24569	0	0	0.103529	0	0	0.245614	0	0.363184	0	0	0.271605	0	0.0761905	0.20202	0.107056	0.20155	0.83758	0.113456	0.127536
lib2_GGGCGTTAGACGACGT-1	0	0	0	0	0	0	0	0	0	0	0	0	0	0	0	0	0	0	0	0	0	0.103448	0	0.430518	0	0	0	0	0	0	0	0	0	0.127059	0	0	0	0	0	0	0	0	0	0	0	0	0	0	0
lib2_GGGCTACAGCCATATC-1	0	0	0	0	0	0	0	0	0	0	0	0	0	0	0	0	0	0	0	0	0	0.103448	0	0.430518	0	0	0	0	0	0	0	0	0	0.127059	0	0	0	0	0	0	0	0	0	0	0	0	0	0	0
lib2_GGGTATTCACACCTTC-1	0.0761905	0	0	0.20202	0	0.107056	0	0.20155	0	0.83758	0	0.113456	0.127536	0	0	0.557377	0	0.129032	0	0	0	0.121839	0	0.678474	0.436508	0	0.442688	0	0	0.24569	0	0	0.103529	0	0	0.245614	0	0.363184	0	0	0.271605	0	0.0761905	0.20202	0.107056	0.20155	0.83758	0.113456	0.127536
lib2_GGGTTATAGAGCAGAA-1	0.0761905	0	0	0.20202	0	0.107056	0	0.20155	0	0.83758	0	0.113456	0.127536	0	0	0.557377	0	0.129032	0	0	0	0.121839	0	0.678474	0.436508	0	0.442688	0	0	0.24569	0	0	0.103529	0	0	0.245614	0	0.363184	0	0	0.271605	0	0.0761905	0.20202	0.107056	0.20155	0.83758	0.113456	0.127536
lib2_GGTAACTAGATCCTAC-1	0.282993	0.159184	0.0767677	0.551515	0	0.472019	0	0.666667	0.382166	0.187898	0.134565	0.567282	0	0.553623	0	0.688525	0.376344	0.272401	0	0.939394	0.441379	0	0.106267	0.700272	0	0.666667	0	0.573123	0	0.392241	0.565789	0	0.36	0.0729412	0	0.815789	0.124378	0.38806	0	1	0.598765	0	0.442177	0.628283	0.472019	0.666667	0.570064	0.701847	0.553623
lib2_GGTAATCAGTAAATGC-1	0	0.156463	0	0.375758	0	0.367397	0	0.236434	0.11465	0	0	0.345646	0	0.237681	0	0	0	0	0	0.511364	0.144828	0	0.111717	0.408719	0	0.801587	0	0.375494	1	0	0.154605	0.161184	0	0	0	0	0	0	0	1	0.648148	0	0.156463	0.375758	0.367397	0.236434	0.11465	0.345646	0.237681
lib2_GGTAGAGCATAGTCAC-1	0.0761905	0	0	0.20202	0	0.107056	0	0.20155	0	0.83758	0	0.113456	0.127536	0	0	0.557377	0	0.129032	0	0	0	0.121839	0	0.678474	0.436508	0	0.442688	0	0	0.24569	0	0	0.103529	0	0	0.245614	0	0.363184	0	0	0.271605	0	0.0761905	0.20202	0.107056	0.20155	0.83758	0.113456	0.127536
lib2_GGTGATTTCCGAAGGA-1	0	0	0	0	0	0	0	0	0	0	0	0	0	0	0	0	0	0	0	0	0	0.103448	0	0.430518	0	0	0	0	0	0	0	0	0	0.127059	0	0	0	0	0	0	0	0	0	0	0	0	0	0	0
lib2_GTACAGTGTTGCGGCT-1	0	0	0	0	0	0	0	0	0	0	0	0	0	0	0	0	0	0	0	0	0	0.112644	0	0.675749	0	0	0	0	0	0	0	0	0	0.270588	0	0.333333	0	0	0	0	0	0	0	0	0	0	0	0	0
lib2_GTACAGTTCCACGTGG-1	0	0	0	0	0	0	0	0	0	0	0	0	0	0	0	0	0	0	0	0	0	0.112644	0	0.675749	0	0	0	0	0	0	0	0	0	0.270588	0	0.333333	0	0	0	0	0	0	0	0	0	0	0	0	0
lib2_GTAGATCAGGTGGGTT-1	0	0	0	0	0	0	0	0	0	0	0	0	0	0	0	0	0	0	0	0	0	0.103448	0	0.430518	0	0	0	0	0	0	0	0	0	0.127059	0	0	0	0	0	0	0	0	0	0	0	0	0	0	0
lib2_GTAGATCCAACTCCAA-1	0	0	0	0	0	0	0	0	0	0	0	0	0	0	0	0	0	0	0	0	0	0.103448	0	0.430518	0	0	0	0	0	0	0	0	0	0.127059	0	0	0	0	0	0	0	0	0	0	0	0	0	0	0
lib2_GTAGATCTCTAGAGCT-1	0	0	0	0	0	0	0	0	0	0	0	0	0	0	0	0	0	0	0	0	0	0.103448	0	0.430518	0	0	0	0	0	0	0	0	0	0.127059	0	0	0	0	0	0	0	0	0	0	0	0	0	0	0
lib2_GTCAAGTAGGCGAACT-1	0	0.156463	0	0.375758	0	0.367397	0	0.236434	0.11465	0	0	0.345646	0	0.237681	0	0	0	0	0	0.511364	0.144828	0	0.111717	0.408719	0	0.801587	0	0.375494	1	0	0.154605	0.161184	0	0	0	0	0	0	0	1	0.648148	0	0.156463	0.375758	0.367397	0.236434	0.11465	0.345646	0.237681
lib2_GTCACTCAGCCATTGT-1	0.0761905	0	0	0.20202	0	0.107056	0	0.20155	0	0.83758	0	0.113456	0.127536	0	0	0.557377	0	0.129032	0	0	0	0.121839	0	0.678474	0.436508	0	0.442688	0	0	0.24569	0	0	0.103529	0	0	0.245614	0	0.363184	0	0	0.271605	0	0.0761905	0.20202	0.107056	0.20155	0.83758	0.113456	0.127536
lib2_GTCACTCCACCCTCTA-1	0	0	0	0	0	0	0	0	0	0	0	0	0	0	0	0	0	0	0	0	0	0.103448	0	0.430518	0	0	0	0	0	0	0	0	0	0.127059	0	0	0	0	0	0	0	0	0	0	0	0	0	0	0
lib2_GTCCACTCATCCCACT-1	0	0	0	0	0	0	0	0	0	0	0	0	0	0	0	0	0	0	0	0	0	0.112644	0	0.675749	0	0	0	0	0	0	0	0	0	0.270588	0	0.333333	0	0	0	0	0	0	0	0	0	0	0	0	0
lib2_GTCCCATCAAGCCCAC-1	0	0.156463	0	0.375758	0	0.367397	0	0.236434	0.11465	0	0	0.345646	0	0.237681	0	0	0	0	0	0.511364	0.144828	0	0.111717	0.408719	0	0.801587	0	0.375494	1	0	0.154605	0.161184	0	0	0	0	0	0	0	1	0.648148	0	0.156463	0.375758	0.367397	0.236434	0.11465	0.345646	0.237681
lib2_GTCGTTCAGAACGTGC-1	0.0761905	0	0	0.20202	0	0.107056	0	0.20155	0	0.83758	0	0.113456	0.127536	0	0	0.557377	0	0.129032	0	0	0	0.121839	0	0.678474	0.436508	0	0.442688	0	0	0.24569	0	0	0.103529	0	0	0.245614	0	0.363184	0	0	0.271605	0	0.0761905	0.20202	0.107056	0.20155	0.83758	0.113456	0.127536
lib2_GTGACGCGTCTCCTGT-1	0	0	0	0	0	0	0	0	0	0	0	0	0	0	0	0	0	0	0	0	0	0.112644	0	0.675749	0	0	0	0	0	0	0	0	0	0.270588	0	0.333333	0	0	0	0	0	0	0	0	0	0	0	0	0
lib2_GTGAGGATCGCACTCT-1	0	0	0	0	0	0	0	0	0	0	0	0	0	0	0	0	0	0	0	0	0	0.103448	0	0.430518	0	0	0	0	0	0	0	0	0	0.127059	0	0	0	0	0	0	0	0	0	0	0	0	0	0	0
lib2_GTGCGTGGTTAATCGC-1	0	0.156463	0	0.375758	0	0.367397	0	0.236434	0.11465	0	0	0.345646	0	0.237681	0	0	0	0	0	0.511364	0.144828	0	0.111717	0.408719	0	0.801587	0	0.375494	1	0	0.154605	0.161184	0	0	0	0	0	0	0	1	0.648148	0	0.156463	0.375758	0.367397	0.236434	0.11465	0.345646	0.237681
lib2_GTGCTTCAGTTCTACG-1	0	0	0	0	0	0	0	0	0	0	0	0	0	0	0	0	0	0	0	0	0	0.112644	0	0.675749	0	0	0	0	0	0	0	0	0	0.270588	0	0.333333	0	0	0	0	0	0	0	0	0	0	0	0	0
lib2_GTGCTTCGTTCCAAAC-1	0.0761905	0	0	0.20202	0	0.107056	0	0.20155	0	0.83758	0	0.113456	0.127536	0	0	0.557377	0	0.129032	0	0	0	0.121839	0	0.678474	0.436508	0	0.442688	0	0	0.24569	0	0	0.103529	0	0	0.245614	0	0.363184	0	0	0.271605	0	0.0761905	0.20202	0.107056	0.20155	0.83758	0.113456	0.127536
lib2_GTGGAGATCCGATCTC-1	0	0	0	0	0	0	0	0	0	0	0	0	0	0	0	0	0	0	0	0	0	0.112644	0	0.675749	0	0	0	0	0	0	0	0	0	0.270588	0	0.333333	0	0	0	0	0	0	0	0	0	0	0	0	0
lib2_GTGGGAAGTTCGGGTC-1	0.0761905	0	0	0.20202	0	0.107056	0	0.20155	0	0.83758	0	0.113456	0.127536	0	0	0.557377	0	0.129032	0	0	0	0.121839	0	0.678474	0.436508	0	0.442688	0	0	0.24569	0	0	0.103529	0	0	0.245614	0	0.363184	0	0	0.271605	0	0.0761905	0.20202	0.107056	0.20155	0.83758	0.113456	0.127536
lib2_GTGTTAGCACTGGCCA-1	0	0	0	0	0	0	0	0	0	0	0	0	0	0	0	0	0	0	0	0	0	0.103448	0	0.430518	0	0	0	0	0	0	0	0	0	0.127059	0	0	0	0	0	0	0	0	0	0	0	0	0	0	0
lib2_GTTAGACGTAGGCTGA-1	0	0	0	0	0	0	0	0	0	0	0	0	0	0	0	0	0	0	0	0	0	0.112644	0	0.675749	0	0	0	0	0	0	0	0	0	0.270588	0	0.333333	0	0	0	0	0	0	0	0	0	0	0	0	0
lib2_GTTCTATCATCTCGTC-1	0	0.156463	0	0.375758	0	0.367397	0	0.236434	0.11465	0	0	0.345646	0	0.237681	0	0	0	0	0	0.511364	0.144828	0	0.111717	0.408719	0	0.801587	0	0.375494	1	0	0.154605	0.161184	0	0	0	0	0	0	0	1	0.648148	0	0.156463	0.375758	0.367397	0.236434	0.11465	0.345646	0.237681
lib2_GTTGCGGGTTCCGTTC-1	0.0761905	0	0	0.20202	0	0.107056	0	0.20155	0	0.83758	0	0.113456	0.127536	0	0	0.557377	0	0.129032	0	0	0	0.121839	0	0.678474	0.436508	0	0.442688	0	0	0.24569	0	0	0.103529	0	0	0.245614	0	0.363184	0	0	0.271605	0	0.0761905	0.20202	0.107056	0.20155	0.83758	0.113456	0.127536
lib2_GTTGTAGTCTACACAG-1	0	0	0	0	0	0	0	0	0	0	0	0	0	0	0	0	0	0	0	0	0	0.112644	0	0.675749	0	0	0	0	0	0	0	0	0	0.270588	0	0.333333	0	0	0	0	0	0	0	0	0	0	0	0	0
lib2_GTTTACTAGTTGGCTT-1	0	0	0	0	0	0	0	0	0	0	0	0	0	0	0	0	0	0	0	0	0	0.112644	0	0.675749	0	0	0	0	0	0	0	0	0	0.270588	0	0.333333	0	0	0	0	0	0	0	0	0	0	0	0	0
lib2_TAACCAGTCTCAACGA-1	0	0	0	0	0	0	0	0	0	0	0	0	0	0	0	0	0	0	0	0	0	0.103448	0	0.430518	0	0	0	0	0	0	0	0	0	0.127059	0	0	0	0	0	0	0	0	0	0	0	0	0	0	0
lib2_TAAGCACGTAGGCAAC-1	0	0	0	0	0	0	0	0	0	0	0	0	0	0	0	0	0	0	0	0	0	0.103448	0	0.430518	0	0	0	0	0	0	0	0	0	0.127059	0	0	0	0	0	0	0	0	0	0	0	0	0	0	0
lib2_TAAGCACGTGTCATCA-1	0	0	0	0	0	0	0	0	0	0	0	0	0	0	0	0	0	0	0	0	0	0.103448	0	0.430518	0	0	0	0	0	0	0	0	0	0.127059	0	0	0	0	0	0	0	0	0	0	0	0	0	0	0
lib2_TAATCTCCAAACACCT-1	0	0	0	0.0989899	0	0	0	0	0	0	0	0	0	0	0	0	0	0	0	0	0	0.289655	0	0	0	0	0	0	0	0	0	0	0	0.284706	0	0.359649	0	0	0	0	0	0	0	0.0989899	0	0	0	0	0
lib2_TACATTCCAGCGAGTA-1	0	0	0	0	0	0	0	0	0	0	0	0	0	0	0	0	0	0	0	0	0	0.103448	0	0.430518	0	0	0	0	0	0	0	0	0	0.127059	0	0	0	0	0	0	0	0	0	0	0	0	0	0	0
lib2_TACCCGTTCCAACTGA-1	0	0	0	0	0	0	0	0	0	0	0	0	0	0	0	0	0	0	0	0	0	0.103448	0	0.430518	0	0	0	0	0	0	0	0	0	0.127059	0	0	0	0	0	0	0	0	0	0	0	0	0	0	0
lib2_TACTTACCACGCTGTG-1	0	0	0	0	0	0	0	0	0	0	0	0	0	0	0	0	0	0	0	0	0	0.103448	0	0.430518	0	0	0	0	0	0	0	0	0	0.127059	0	0	0	0	0	0	0	0	0	0	0	0	0	0	0
lib2_TAGATCGGTACTCGAT-1	0	0	0	0	0	0	0	0	0	0	0	0	0	0	0	0	0	0	0	0	0	0.112644	0	0.675749	0	0	0	0	0	0	0	0	0	0.270588	0	0.333333	0	0	0	0	0	0	0	0	0	0	0	0	0
lib2_TATACCTCATTGCCTC-1	0	0	0	0	0	0	0	0	0	0	0	0	0	0	0	0	0	0	0	0	0	0.103448	0	0.430518	0	0	0	0	0	0	0	0	0	0.127059	0	0	0	0	0	0	0	0	0	0	0	0	0	0	0
lib2_TATCTTGTCCATTGCC-1	0	0	0	0	0	0	0	0	0	0	0	0	0	0	0	0	0	0	0	0	0	0.112644	0	0.675749	0	0	0	0	0	0	0	0	0	0.270588	0	0.333333	0	0	0	0	0	0	0	0	0	0	0	0	0
lib2_TATTCCAAGAGTGACC-1	0	0	0	0	0	0	0	0	0	0	0	0	0	0	0	0	0	0	0	0	0	0.112644	0	0.675749	0	0	0	0	0	0	0	0	0	0.270588	0	0.333333	0	0	0	0	0	0	0	0	0	0	0	0	0
[truncated: 1,160 more rows]
[truncated: 14 more columns]
