# Supplementary material for: Single-cell Transcriptomics of Postimplantation Embryos: Unveiling Aneuploidy Effects and Lineage Dynamics
Source: Research Square preprint supplement (doi:10.21203/rs.3.rs-4111897/v1), 2024-03-22
Supplement: Supplementary file 5 [file 9768682119fac5de167a2322.xlsx]

## Sheet: Sheet 1
cell	seurat_clusters	max	cnv_status	aberration_score
lib230524_AAACCCAGTTCTTGCC-1	CTB	0.837681	Aneuploid	98.9609
lib230524_AAACGAAAGTAGGGTC-1	STB	1	Aneuploid	95.2241
lib230524_AAACGAAGTTAATGAG-1	STB	0.135081	Euploid	52.2845
lib230524_AAACGAATCCATCTCG-1	STB	1	Aneuploid	95.8893
lib230524_AAACGAATCTTGATTC-1	STB	1	Aneuploid	67.243
lib230524_AAAGAACAGCGTACAG-1	STB	0	Euploid	40.9063
lib230524_AAAGGGCCACAGCTTA-1	STB	0.174387	Euploid	35.3171
lib230524_AAAGGGCCACCTGCAG-1	CTB	1	Aneuploid	148.148
lib230524_AAAGGGCCAGCTGAAG-1	STB	0.111717	Euploid	94.9575
lib230524_AAAGGGCCAGTAGTTC-1	CTB	0.262295	Euploid	133.296
lib230524_AAAGGGCGTGAGATCG-1	STB	1	Aneuploid	83.3662
lib230524_AAAGGGCGTTAACCTG-1	STB	0.927536	Aneuploid	71.1022
lib230524_AAAGTCCGTCTGATCA-1	CTB	1	Aneuploid	110.071
lib230524_AACAAGACAGGTTACT-1	STB	0.394737	Euploid	42.4378
lib230524_AACACACCAGACCGCT-1	STB	1	Aneuploid	126.913
lib230524_AACCAACCAGGTATGG-1	STB	1	Aneuploid	136.202
lib230524_AACCAACGTTGTGGCC-1	CTB	0.714286	Aneuploid	110.409
lib230524_AACCAACTCCTACTGC-1	STB	0.394737	Euploid	71.7773
lib230524_AACCATGCAGGGTCTC-1	STB	1	Aneuploid	60.7046
lib230524_AACCCAAGTAGATGTA-1	STB	0.111717	Euploid	74.396
lib230524_AACCCAATCTACACAG-1	STB	1	Aneuploid	58.1666
lib230524_AACCTTTAGAGTCAGC-1	CTB	0.236842	Euploid	113.41
lib230524_AACGAAAAGTGAGTTA-1	CTB	0.174387	Euploid	123.364
lib230524_AACGTCAGTCGATGCC-1	CTB	1	Aneuploid	97.3972
lib230524_AACTTCTAGCCGTCGT-1	CTB	0.174387	Euploid	115.902
lib230524_AACTTCTTCACCTCGT-1	CTB	1	Aneuploid	187.219
lib230524_AAGACAATCCTCCACA-1	CTB	0.714286	Aneuploid	96.2135
lib230524_AAGATAGGTTCCTACC-1	STB	0.927536	Aneuploid	105.199
lib230524_AAGCCATTCACCATGA-1	STB	0.135081	Euploid	65.4799
lib230524_AAGCGTTTCCAACTAG-1	CTB	0.714286	Aneuploid	101.777
lib230524_AAGGAATGTACGATCT-1	STB	0.135081	Euploid	83.9499
lib230524_AAGGTAAAGGGAGAAT-1	CTB	0.111717	Euploid	76.1166
lib230524_AAGGTAAGTAACATCC-1	EVT	0.111717	Euploid	55.4076
lib230524_AAGGTAAGTCTCTCTG-1	EPI	0	Euploid	88.7508
lib230524_AAGTACCCAATTGCGT-1	STB	0.714286	Aneuploid	115.932
lib230524_AAGTACCTCCCGTTGT-1	STB	1	Aneuploid	113.994
lib230524_AAGTCGTAGACGCATG-1	EVT	0.262295	Euploid	140.414
lib230524_AAGTTCGAGCATACTC-1	CTB	0.837681	Aneuploid	103.026
lib230524_AATAGAGGTAGCTAAA-1	STB	0.394737	Euploid	49.9835
lib230524_AATCGACCATACTGAC-1	STB	0.321526	Euploid	140.848
lib230524_AATCGTGTCCACACAA-1	STB	0.394737	Euploid	74.3869
lib230524_AATGAAGAGAAGGATG-1	CTB	0.174387	Euploid	105.502
lib230524_AATGAAGGTACTAAGA-1	CTB	0.111717	Euploid	78.2495
lib230524_AATGACCGTCGCCACA-1	EVT	1	Aneuploid	273.57
lib230524_AATGGAAAGGTAAGAG-1	CTB	1	Aneuploid	133.955
lib230524_AATGGAAAGGTTACCT-1	STB	0.394737	Euploid	92.7527
lib230524_AATGGAACAACTTGCA-1	STB	0.394737	Euploid	93.3777
lib230524_AATGGCTTCCGTGGCA-1	STB	0.111717	Euploid	22.8034
lib230524_AATTCCTAGACATATG-1	STB	1	Aneuploid	54.7276
lib230524_ACAAGCTAGCCAAGTG-1	CTB	0.111717	Euploid	163.076
lib230524_ACACGCGTCTTTCCAA-1	CTB	0.174387	Euploid	87.4819
lib230524_ACAGCCGGTAGGTTTC-1	EVT	0.135081	Euploid	19.2111
lib230524_ACAGCCGGTCAAAGAT-1	EVT	0.837681	Aneuploid	133.926
lib230524_ACAGCCGTCGGATTAC-1	CTB	0.714286	Aneuploid	101.947
lib230524_ACATCCCAGTTCAACC-1	EPI	0.837681	Aneuploid	96.1655
lib230524_ACATCCCCACCGGAAA-1	STB	0.927536	Aneuploid	167.366
lib230524_ACATTTCGTCAACCTA-1	CTB	1	Aneuploid	190.25
lib230524_ACCAAACCAACCAACT-1	STB	0.262295	Euploid	97.7582
lib230524_ACCAAACTCTCAACCC-1	CTB	1	Aneuploid	153.38
lib230524_ACCATTTAGAAACTGT-1	EVT	0.927536	Aneuploid	102.746
lib230524_ACCATTTCATGGGAAC-1	STB	0.111717	Euploid	66.6322
lib230524_ACCCAAACAACGGTAG-1	STB	1	Aneuploid	98.4376
lib230524_ACCCTCACAGCGACCT-1	STB	0.394737	Euploid	94.7218
lib230524_ACCCTCATCGCGTAGC-1	STB	0.135081	Euploid	80.1535
lib230524_ACCTGAACAAGTTGGG-1	CTB	1	Aneuploid	87.0997
lib230524_ACGGTCGTCGAAACAA-1	STB	0.321526	Euploid	86.5992
lib230524_ACGGTTAGTGAATATG-1	STB	0.394737	Euploid	77.1959
lib230524_ACGTAACGTTGAATCC-1	STB	0.174387	Euploid	41.504
lib230524_ACGTAACTCATTCGGA-1	CTB	0.111717	Euploid	106.727
lib230524_ACGTAACTCGCGCTGA-1	STB	0.394737	Euploid	132.658
lib230524_ACGTACAAGGCACTAG-1	CTB	1	Aneuploid	82.3308
lib230524_ACGTACACAGTCTCTC-1	STB	0.714286	Aneuploid	41.4572
lib230524_ACGTACAGTTCCAGGC-1	CTB	0.394737	Euploid	125.648
lib230524_ACGTTCCGTATGGTTC-1	EVT	0.111717	Euploid	18.5921
lib230524_ACGTTCCTCATTGTTC-1	CTB	0.714286	Aneuploid	149.264
lib230524_ACTACGACAATTTCCT-1	CTB	1	Aneuploid	96.7865
lib230524_ACTACGACACTACAGT-1	CTB	0.174387	Euploid	120.377
lib230524_ACTATGGCAGAAGCTG-1	CTB	0.135081	Euploid	86.1639
lib230524_ACTATTCCACTCCACT-1	EPI	0.135081	Euploid	130.016
lib230524_ACTATTCGTGGGATTG-1	STB	0.135081	Euploid	35.7854
lib230524_ACTATTCGTTATAGCC-1	EPI	0.236842	Euploid	107.23
lib230524_ACTATTCTCTGGCTGG-1	STB	0.394737	Euploid	100.838
lib230524_ACTGATGCACGTTGGC-1	STB	0.714286	Aneuploid	105.597
lib230524_ACTGCAACATCTATCT-1	HYPO	0.714286	Aneuploid	125.767
lib230524_ACTGTGAAGTTGGACG-1	STB	0.394737	Euploid	57.6853
lib230524_ACTTAGGCATCTCAAG-1	STB	0.321526	Euploid	84.8468
lib230524_ACTTAGGGTAGATCCT-1	EVT	0.714286	Aneuploid	83.4584
lib230524_ACTTAGGGTTCTAAGC-1	STB	0.394737	Euploid	62.5531
lib230524_ACTTCCGAGCGACTGA-1	CTB	1	Aneuploid	96.5199
lib230524_ACTTCGCAGCCTCTTC-1	STB	0.394737	Euploid	89.0761
lib230524_ACTTCGCGTGTTCATG-1	STB	1	Aneuploid	97.0611
lib230524_ACTTTCACAATTGCTG-1	CTB	1	Aneuploid	184.962
lib230524_ACTTTGTAGAAAGCGA-1	STB	0.174387	Euploid	39.3697
lib230524_AGAAATGAGCTGACAG-1	STB	0.927536	Aneuploid	112.052
lib230524_AGAAATGCAGCTGTGC-1	STB	0.135081	Euploid	79.8671
lib230524_AGAAATGGTGGAGAAA-1	CTB	0.111717	Euploid	43.4028
lib230524_AGAACAAAGACGAAGA-1	CTB	0.837681	Aneuploid	97.1575
lib230524_AGAACAACATTGTAGC-1	STB	0.236842	Euploid	128.968
lib230524_AGAACAAGTGTACAGG-1	STB	1	Aneuploid	100.913
lib230524_AGAAGCGCACCGTCGA-1	CTB	0.174387	Euploid	118.905
lib230524_AGACAAATCTTCCAGC-1	EVT	0.394737	Euploid	126.146
lib230524_AGACTCAAGAAGGGAT-1	CTB	1	Aneuploid	120.919
lib230524_AGACTCACATCTTCGC-1	EVT	0.262295	Euploid	322.723
lib230524_AGAGAATGTTCTCTAT-1	STB	0.135081	Euploid	49.8053
lib230524_AGAGCAGCAGGTTTAC-1	CTB	0.714286	Aneuploid	75.1874
lib230524_AGAGCCCAGCTACTAC-1	STB	0.174387	Euploid	33.8162
lib230524_AGAGCCCCACATGGTT-1	CTB	1	Aneuploid	127.196
lib230524_AGATAGAAGACCATAA-1	STB	0.135081	Euploid	25.1343
lib230524_AGATAGAAGCACTAAA-1	STB	0.321526	Euploid	79.5709
lib230524_AGATAGAGTGTCATTG-1	STB	1	Aneuploid	76.9681
lib230524_AGATGAACAACTACGT-1	STB	0.927536	Aneuploid	147.764
lib230524_AGCCAATAGGTAGGCT-1	STB	0.714286	Aneuploid	105.679
lib230524_AGCCACGAGGATACGC-1	CTB	0.174387	Euploid	112.707
lib230524_AGCCACGTCAGGACGA-1	STB	0.714286	Aneuploid	161.638
lib230524_AGCGCTGTCTACCTTA-1	CTB	0.111717	Euploid	122.968
lib230524_AGCTACAGTAGCTGAG-1	STB	0.321526	Euploid	80.8954
lib230524_AGCTACAGTGATTCTG-1	CTB	1	Aneuploid	107.579
lib230524_AGCTCAACAAGTGGAC-1	EVT	1	Aneuploid	105.743
lib230524_AGCTTCCCACATACGT-1	CTB	0.394737	Euploid	169.122
lib230524_AGGAAATCACCGTACG-1	STB	0.111717	Euploid	51.0567
lib230524_AGGACTTGTCTGTGAT-1	CTB	0.174387	Euploid	144.707
lib230524_AGGACTTTCAATCTTC-1	STB	0.714286	Aneuploid	86.3346
lib230524_AGGAGGTGTATACCTG-1	EVT	1	Aneuploid	89.5354
lib230524_AGGAGGTGTCTAGATC-1	EVT	0.135081	Euploid	41.2462
lib230524_AGGAGGTTCGTGAGAG-1	CTB	0.714286	Aneuploid	129.405
lib230524_AGGATAAGTCTAACGT-1	STB	0.321526	Euploid	53.9192
lib230524_AGGATCTGTATGAGAT-1	EVT	1	Aneuploid	77.9457
lib230524_AGGCATTGTCCGTTTC-1	STB	0.111717	Euploid	35.5446
lib230524_AGGCATTTCACTACGA-1	STB	0.111717	Euploid	93.0035
lib230524_AGGCATTTCGGCATCG-1	STB	0.394737	Euploid	80.0528
lib230524_AGGCCACGTTGGAGAC-1	STB	0.111717	Euploid	24.7089
lib230524_AGGCCACTCTGCGTCT-1	STB	0.236842	Euploid	154.255
lib230524_AGGCTGCCACTGGCCA-1	CTB	0.837681	Aneuploid	186.407
lib230524_AGGCTGCGTTGGCCTG-1	STB	0.111717	Euploid	26.3428
lib230524_AGGGAGTAGCCGTTAT-1	CTB	0.927536	Aneuploid	142.138
lib230524_AGGGCCTAGTAGCTCT-1	EVT	0.394737	Euploid	145.517
lib230524_AGGGTCCGTAGGAGTC-1	STB	0.236842	Euploid	151.312
lib230524_AGGGTTTCATCTCGTC-1	STB	0.714286	Aneuploid	75.5372
lib230524_AGGGTTTGTATGGTTC-1	STB	1	Aneuploid	108.599
lib230524_AGGTCATAGCTTCTAG-1	EVT	0.135081	Euploid	33.8735
lib230524_AGGTCATAGGTTCACT-1	STB	0.321526	Euploid	70.0966
lib230524_AGGTCTAAGGGCTAAC-1	CTB	1	Aneuploid	72.9338
lib230524_AGGTGTTGTTCGGACC-1	CTB	0.135081	Euploid	102.252
lib230524_AGGTGTTTCGTTCTGC-1	STB	0.714286	Aneuploid	97.0585
lib230524_AGGTTACTCCGCAGTG-1	EPI	0.365079	Euploid	137.173
lib230524_AGTACCAAGAGGTTAT-1	CTB	0.135081	Euploid	124.322
lib230524_AGTACCAAGGTGCCAA-1	STB	0.41791	Euploid	70.9514
lib230524_AGTACCACACTGTTCC-1	STB	0.262295	Euploid	126.287
lib230524_AGTACCACATAGGAGC-1	STB	0.714286	Aneuploid	66.0347
lib230524_AGTACTGTCGGAGTGA-1	CTB	1	Aneuploid	66.903
lib230524_AGTAGCTTCTCATAGG-1	STB	0.321526	Euploid	112.566
lib230524_AGTAGCTTCTGAACGT-1	STB	0.135081	Euploid	77.3734
lib230524_AGTAGTCCATATACCG-1	STB	0.111717	Euploid	40.5474
lib230524_AGTCAACAGCCGGAAT-1	EPI	0.837681	Aneuploid	96.1089
lib230524_AGTCACACAAGCTGCC-1	STB	0.394737	Euploid	76.086
lib230524_AGTCTCCGTAATGATG-1	CTB	0.135081	Euploid	116.427
lib230524_AGTCTCCGTCACTCTC-1	CTB	1	Aneuploid	130.877
lib230524_AGTCTCCTCGGATACT-1	STB	0.111717	Euploid	49.7296
lib230524_AGTGACTTCTGAATCG-1	EPI	0.135081	Euploid	121.783
lib230524_AGTGTTGCACAAAGTA-1	EVT	1	Aneuploid	39.1785
lib230524_AGTTAGCCAATTTCTC-1	CTB	0.111717	Euploid	113.21
lib230524_ATACCTTAGTTACGGG-1	STB	1	Aneuploid	114.67
lib230524_ATACTTCTCTCGTCAC-1	STB	1	Aneuploid	39.7057
lib230524_ATCACTTTCCTTACCG-1	CTB	0.174387	Euploid	44.0676
lib230524_ATCAGGTAGATGCTTC-1	CTB	0.927536	Aneuploid	153.393
lib230524_ATCAGGTGTTTGGAGG-1	CTB	1	Aneuploid	96.2486
lib230524_ATCATTCCAACGCATT-1	STB	0.714286	Aneuploid	56.9646
lib230524_ATCATTCGTTGCCGAC-1	STB	1	Aneuploid	30.4035
lib230524_ATCCACCCATGTAACC-1	STB	0.714286	Aneuploid	61.8041
lib230524_ATCCACCTCCATTTGT-1	EVT	0	Euploid	70.6585
lib230524_ATCCATTTCGTGGGTC-1	STB	1	Aneuploid	56.399
lib230524_ATCCATTTCTCCGCAT-1	STB	0.394737	Euploid	95.1216
lib230524_ATCCCTGAGCCTCTCT-1	STB	0.394737	Euploid	91.557
lib230524_ATCCCTGAGCGTGTCC-1	STB	1	Aneuploid	92.7618
lib230524_ATCCCTGCACACAGCC-1	STB	0.135081	Euploid	95.7192
lib230524_ATCCCTGTCAAATGCC-1	STB	0.135081	Euploid	40.0843
lib230524_ATCCCTGTCCGTGTAA-1	CTB	0.111717	Euploid	99.0259
lib230524_ATCCTATCAGAACTTC-1	STB	0.714286	Aneuploid	84.5978
lib230524_ATCCTATCAGCAAGAC-1	CTB	1	Aneuploid	62.2658
lib230524_ATCCTATCATAGAGGC-1	STB	0.135081	Euploid	107.306
lib230524_ATCGCCTAGTCGCGAA-1	STB	0.394737	Euploid	94.1882
lib230524_ATCGCCTTCTCGTTTA-1	STB	0.927536	Aneuploid	101.597
lib230524_ATCGGATCAAATTGGA-1	CTB	0.174387	Euploid	98.463
lib230524_ATCGGATGTGGACTAG-1	EVT	0.41791	Euploid	51.7267
lib230524_ATCGGATTCCACGTAA-1	CTB	0.174387	Euploid	109.555
lib230524_ATCGTAGAGCTTTGTG-1	STB	0.174387	Euploid	118.323
lib230524_ATCGTCCCACATATGC-1	STB	0.111717	Euploid	43.0287
lib230524_ATCTCTAAGCCTCACG-1	STB	0.394737	Euploid	77.4432
lib230524_ATCTCTAGTGAATGTA-1	STB	0.394737	Euploid	111.131
lib230524_ATCTCTATCTTGGAAC-1	STB	0.321526	Euploid	81.4174
lib230524_ATGACCACACTCGATA-1	EVT	0.41791	Euploid	99.6505
lib230524_ATGCCTCTCAGCTCTC-1	STB	0.394737	Euploid	88.5248
lib230524_ATGCGATCATGGGTCC-1	EVT	1	Aneuploid	39.5754
lib230524_ATGGATCAGGTTATAG-1	CTB	0.174387	Euploid	137.635
lib230524_ATGGATCGTTCGGCTG-1	STB	1	Aneuploid	79.2908
lib230524_ATGGGTTTCACCGGTG-1	CTB	0.714286	Aneuploid	87.0372
lib230524_ATGTCCCCAGCTTTCC-1	STB	0.714286	Aneuploid	68.3639
lib230524_ATGTCTTCACCTATCC-1	CTB	0.135081	Euploid	40.283
lib230524_ATGTCTTTCAGCTTGA-1	CTB	0.714286	Aneuploid	76.9869
lib230524_ATGTCTTTCTGTAAGC-1	STB	0.394737	Euploid	81.0987
lib230524_ATTACCTGTTGTGTAC-1	STB	0.41791	Euploid	82.7517
lib230524_ATTACTCTCTGCGAGC-1	STB	1	Aneuploid	79.2502
lib230524_ATTATCCTCTGGAGAG-1	STB	0.41791	Euploid	70.5723
lib230524_ATTCACTCACGGGTAA-1	STB	0.394737	Euploid	90.95
lib230524_ATTCAGGCATTCTGTT-1	EVT	0.927536	Aneuploid	91.7572
lib230524_ATTCCATTCCGTTTCG-1	CTB	0.837681	Aneuploid	182.341
lib230524_ATTCCCGTCCTAGAGT-1	EVT	0.174387	Euploid	69.3125
lib230524_ATTGGGTAGCATCGAG-1	CTB	0.174387	Euploid	118.198
lib230524_ATTGGGTTCTAATTCC-1	CTB	0.365079	Euploid	115.077
lib230524_ATTGTTCCACCGTGCA-1	STB	0.714286	Aneuploid	151.958
lib230524_CAAAGAAAGGAATGTT-1	STB	1	Aneuploid	88.9906
lib230524_CAACAACCAGGTATGG-1	CTB	1	Aneuploid	133.534
lib230524_CAACAACTCTTCGTAT-1	STB	1	Aneuploid	57.4826
lib230524_CAACCTCTCCCATTCG-1	CTB	1	Aneuploid	78.5892
lib230524_CAACGATAGCACACAG-1	STB	1	Aneuploid	74.0769
lib230524_CAACGATAGTAACCTC-1	CTB	0.174387	Euploid	93.7007
lib230524_CAAGGGAAGGACTAAT-1	EVT	0.262295	Euploid	139.288
lib230524_CAATCGAGTAGGACTG-1	EVT	1	Aneuploid	240.445
lib230524_CAATGACTCATGCGGC-1	STB	0.135081	Euploid	140.953
lib230524_CAATTTCTCTGACAGT-1	CTB	0.837681	Aneuploid	139.213
lib230524_CACATGAGTGTGGTCC-1	EVT	0.394737	Euploid	130.311
lib230524_CACCGTTAGGTGCCAA-1	STB	1	Aneuploid	154.981
lib230524_CACGAATGTTGGGTAG-1	STB	0.394737	Euploid	117.644
lib230524_CACGAATTCTGCGATA-1	CTB	1	Aneuploid	148.568
lib230524_CACGTGGAGAAATCCA-1	STB	0.321526	Euploid	76.5747
lib230524_CACGTGGCAGGCTCTG-1	STB	0.394737	Euploid	64.7177
lib230524_CACGTGGTCTGTCGCT-1	CTB	0.111717	Euploid	76.7076
lib230524_CACGTTCAGCCAAGTG-1	STB	0.111717	Euploid	61.2811
lib230524_CACTGGGGTCCACTTC-1	CTB	0.41791	Euploid	82.3989
lib230524_CACTTCGAGCCGCACT-1	CTB	1	Aneuploid	115.678
lib230524_CAGAGCCCAGTCCCGA-1	STB	0.714286	Aneuploid	94.8759
lib230524_CAGAGCCTCGAACACT-1	EVT	0.837681	Aneuploid	50.4019
lib230524_CAGATTGCACTGTCCT-1	STB	1	Aneuploid	128.611
lib230524_CAGATTGTCACCTCAC-1	CTB	0.714286	Aneuploid	100.205
lib230524_CAGCAATAGATTGATG-1	CTB	0.135081	Euploid	95.7365
lib230524_CAGCCAGCATGACTGT-1	STB	0.135081	Euploid	106.149
lib230524_CAGCGTGCATACGCAT-1	STB	0.135081	Euploid	111.707
lib230524_CAGGCCATCCTATTTG-1	EVT	0.262295	Euploid	116.364
lib230524_CAGGGCTAGGACTAAT-1	CTB	0.714286	Aneuploid	83.583
lib230524_CAGGGCTCACAGCCAC-1	STB	0.394737	Euploid	86.3392
lib230524_CAGTGCGTCAGTGGGA-1	STB	1	Aneuploid	73.8052
lib230524_CATAAGCAGGTTGGAC-1	STB	0.135081	Euploid	116.303
lib230524_CATACAGCACCCAATA-1	EVT	1	Aneuploid	53.4455
lib230524_CATACCCGTCATCGGC-1	EPI	0.714286	Aneuploid	110.352
lib230524_CATACCCTCTCCGAGG-1	CTB	0.174387	Euploid	121.992
lib230524_CATAGACGTCCCACGA-1	EPI	0.236842	Euploid	64.8683
lib230524_CATCAAGCAACCAGAG-1	STB	0.394737	Euploid	73.1314
lib230524_CATCAAGCATGTGGTT-1	STB	0.262295	Euploid	107.456
lib230524_CATCCACCATCATCTT-1	CTB	0.837681	Aneuploid	177.163
lib230524_CATCCACGTGAGGATC-1	STB	0.714286	Aneuploid	36.5015
lib230524_CATCCACTCCTTGGAA-1	CTB	0.365079	Euploid	93.1487
lib230524_CATCCGTGTCGTACAT-1	STB	0.111717	Euploid	101.357
lib230524_CATCCGTTCTCGGTCT-1	STB	1	Aneuploid	113.063
lib230524_CATCGCTTCATTTGTC-1	STB	1	Aneuploid	109.954
lib230524_CATCGTCGTCTGGTTA-1	CTB	0.41791	Euploid	112.999
lib230524_CATCGTCTCTGATTCT-1	STB	0.321526	Euploid	86.2804
lib230524_CATGCGGAGAGCAGTC-1	STB	0.236842	Euploid	170.247
lib230524_CATGCTCCACAACGAG-1	CTB	0.111717	Euploid	60.6461
lib230524_CATGCTCCAGGTTTAC-1	STB	0.262295	Euploid	85.8476
lib230524_CATGCTCCATGCACTA-1	STB	0.135081	Euploid	109.885
lib230524_CATTCATCATGACTTG-1	STB	0.321526	Euploid	79.0745
lib230524_CATTCATTCACCGGGT-1	STB	0.927536	Aneuploid	149.591
lib230524_CATTCCGAGCGCCCAT-1	STB	0.394737	Euploid	72.9737
lib230524_CATTCCGCAATTTCTC-1	EVT	0.262295	Euploid	148.114
lib230524_CATTCCGTCGCAGTTA-1	STB	0.174387	Euploid	44.8322
lib230524_CATTGAGCAATTCTCT-1	STB	0.927536	Aneuploid	61.7609
lib230524_CATTGAGGTCCAGCAC-1	CTB	1	Aneuploid	108.777
lib230524_CATTGAGTCATTGCCC-1	STB	0.111717	Euploid	69.5262
lib230524_CATTGCCAGACTGGGT-1	EVT	0.41791	Euploid	101.228
lib230524_CATTGCCTCTAGACCA-1	STB	0.321526	Euploid	87.9218
lib230524_CATTTCACACTGGCGT-1	EVT	0.111717	Euploid	21.5319
lib230524_CCAATTTTCAGCCCAG-1	EVT	0.837681	Aneuploid	124.146
lib230524_CCAATTTTCAGTGTTG-1	CTB	0.174387	Euploid	126.236
lib230524_CCACAAATCTAGTTCT-1	STB	0.714286	Aneuploid	46.6015
lib230524_CCACCATTCCACTGGG-1	CTB	0.174387	Euploid	85.6821
lib230524_CCACGTTGTCGCGGTT-1	CTB	0.927536	Aneuploid	77.5683
lib230524_CCACGTTGTGCACAAG-1	STB	0.394737	Euploid	90.3838
lib230524_CCACTTGAGTATCCTG-1	CTB	1	Aneuploid	160.364
lib230524_CCATAAGCATTCAGCA-1	STB	0.41791	Euploid	90.4454
lib230524_CCATCACGTCTGTGAT-1	CTB	0.714286	Aneuploid	168.685
lib230524_CCCATTGAGTGCCAGA-1	CTB	0.714286	Aneuploid	142.965
lib230524_CCCGAAGAGTCACTAC-1	STB	0.321526	Euploid	33.1051
lib230524_CCCGAAGCATAACTCG-1	STB	1	Aneuploid	180.715
lib230524_CCCGAAGTCATCAGTG-1	EVT	0.837681	Aneuploid	91.1739
lib230524_CCCGGAAGTCATTGCA-1	EVT	0.111717	Euploid	51.9439
lib230524_CCCTAACGTGCTCTTC-1	CTB	1	Aneuploid	143.307
lib230524_CCCTAACGTTTGGCTA-1	STB	0.135081	Euploid	132.801
lib230524_CCCTCTCAGCAGTACG-1	CTB	0.135081	Euploid	61.5889
lib230524_CCCTCTCAGCATCGAG-1	EVT	0.111717	Euploid	43.0161
lib230524_CCCTCTCAGCCGTTAT-1	STB	0.321526	Euploid	92.5699
lib230524_CCCTCTCCAAGTTTGC-1	STB	0.714286	Aneuploid	41.592
lib230524_CCCTCTCGTACGCGTC-1	EVT	0.714286	Aneuploid	34.0525
lib230524_CCCTCTCTCGAGATAA-1	CTB	0.111717	Euploid	104.973
lib230524_CCCTGATAGACAGCGT-1	STB	0.714286	Aneuploid	97.7039
lib230524_CCCTGATCAACAGATA-1	STB	0.394737	Euploid	102.228
lib230524_CCCTGATCATACCACA-1	STB	0.111717	Euploid	48.7276
lib230524_CCGATGGCAAATCAGA-1	STB	0.714286	Aneuploid	35.1476
lib230524_CCGATGGTCCGATAGT-1	CTB	1	Aneuploid	92.8909
lib230524_CCGCAAGGTATGCTAC-1	STB	0.135081	Euploid	42.2358
lib230524_CCGGTAGTCTGGAGAG-1	STB	0.321526	Euploid	72.1251
lib230524_CCGTAGGCAGAGAGGG-1	STB	1	Aneuploid	84.8697
lib230524_CCGTTCAGTAGACAGC-1	STB	0.714286	Aneuploid	42.681
lib230524_CCTAACCGTGAATAAC-1	STB	0.394737	Euploid	84.6087
lib230524_CCTAAGACAGAGTCTT-1	EVT	0.927536	Aneuploid	53.6004
lib230524_CCTACGTTCGCCTATC-1	STB	0.714286	Aneuploid	68.6748
lib230524_CCTATCGCACTGAGGA-1	EVT	1	Aneuploid	38.0712
lib230524_CCTATCGCAGGTGAGT-1	CTB	0.111717	Euploid	82.7329
lib230524_CCTCAACAGCTCAGAG-1	STB	0.714286	Aneuploid	50.8983
lib230524_CCTCCAAGTGCCCAGT-1	STB	0.714286	Aneuploid	48.206
lib230524_CCTCCAATCTGTAACG-1	STB	0.321526	Euploid	73.8393
lib230524_CCTCCTCCAAATGATG-1	EVT	1	Aneuploid	55.2091
lib230524_CCTCTCCGTCCTATAG-1	CTB	1	Aneuploid	122.65
lib230524_CCTGCATCAAGTCATC-1	STB	1	Aneuploid	52.5697
lib230524_CCTGCATCACACTGGC-1	EVT	1	Aneuploid	191.392
lib230524_CCTGTTGCATGTGACT-1	CTB	0.714286	Aneuploid	154.171
lib230524_CCTTGTGCATTGTAGC-1	CTB	0.174387	Euploid	138.633
lib230524_CCTTGTGGTGTGAGCA-1	STB	0.262295	Euploid	113.139
lib230524_CGAAGGAAGCTAATGA-1	CTB	1	Aneuploid	60.1123
lib230524_CGAAGGAAGGCTGGAT-1	STB	0.41791	Euploid	73.6685
lib230524_CGAAGGATCCCTGGTT-1	STB	0.927536	Aneuploid	49.6832
lib230524_CGAAGTTCATTCGATG-1	CTB	0.714286	Aneuploid	56.7657
lib230524_CGAGAAGGTTTATGCG-1	CTB	0.111717	Euploid	118.028
lib230524_CGAGTTACATCAACCA-1	STB	0.394737	Euploid	64.4231
lib230524_CGAGTTACATGTGGTT-1	CTB	0.111717	Euploid	90.6603
lib230524_CGAGTTAGTCGGTGAA-1	STB	0.927536	Aneuploid	126.652
lib230524_CGATCGGAGCACCGTC-1	EVT	0.111717	Euploid	109.674
lib230524_CGATCGGCAGCTTTGA-1	EVT	0.135081	Euploid	26.0865
lib230524_CGATCGGGTAGGCTGA-1	STB	1	Aneuploid	54.3918
lib230524_CGCAGGTAGACGGAAA-1	STB	0.111717	Euploid	68.4852
lib230524_CGCATAAAGTGTTCCA-1	CTB	0.714286	Aneuploid	115.739
lib230524_CGCCAGACATGAGGGT-1	STB	0.174387	Euploid	98.8368
lib230524_CGCCAGATCACTCTTA-1	STB	0.927536	Aneuploid	99.3545
lib230524_CGGAATTCAAACGGCA-1	STB	0.135081	Euploid	96.2177
lib230524_CGGACACAGGTATCTC-1	STB	0.927536	Aneuploid	113.356
lib230524_CGGCAGTTCCCAAGCG-1	STB	1	Aneuploid	99.302
lib230524_CGGGCATAGCCTTTGA-1	CTB	0.174387	Euploid	154.274
lib230524_CGGGCATCACTAGAGG-1	CTB	1	Aneuploid	100.85
lib230524_CGGGCATGTAGTGCGA-1	CTB	0.135081	Euploid	71.6676
lib230524_CGGGCATTCTGGTCAA-1	STB	0.135081	Euploid	106.924
lib230524_CGTAATGCAATAGTGA-1	CTB	0.262295	Euploid	117.167
lib230524_CGTAATGTCTAACACG-1	STB	0.262295	Euploid	94.5811
lib230524_CGTAATGTCTTGTGCC-1	CTB	1	Aneuploid	56.2039
lib230524_CGTAGTATCAATCTTC-1	STB	0.111717	Euploid	66.9458
lib230524_CGTAGTATCACTACGA-1	STB	0.714286	Aneuploid	44.8411
lib230524_CGTGATAAGTGGACTG-1	STB	0.321526	Euploid	89.6954
lib230524_CGTGATAGTCGCGTTG-1	CTB	0.174387	Euploid	102.268
lib230524_CGTTAGAAGAGAGCAA-1	STB	0.714286	Aneuploid	65.6791
lib230524_CGTTCTGCATGGCACC-1	CTB	0.174387	Euploid	107.586
lib230524_CGTTGGGAGGTATAGT-1	STB	0.321526	Euploid	48.3405
lib230524_CGTTGGGGTTCTCACC-1	STB	0.714286	Aneuploid	45.8091
lib230524_CTAACCCCAATTTCTC-1	EPI	0.837681	Aneuploid	122.022
lib230524_CTAACCCCATGACTGT-1	CTB	0.135081	Euploid	34.6239
lib230524_CTAACTTCAGGTTTAC-1	CTB	0.262295	Euploid	93.2262
lib230524_CTAACTTGTAGCCCTG-1	CTB	0.714286	Aneuploid	94.7563
lib230524_CTAACTTGTGGGCTTC-1	STB	0.135081	Euploid	74.8669
lib230524_CTAAGTGAGAAATGGG-1	CTB	1	Aneuploid	112.172
lib230524_CTAAGTGGTTAAGCAA-1	STB	0.394737	Euploid	49.1295
lib230524_CTACATTAGATGTTGA-1	EVT	0.394737	Euploid	130.246
lib230524_CTAGACAGTGCCTATA-1	CTB	1	Aneuploid	115.241
lib230524_CTAGGTAGTATGGTTC-1	STB	0.394737	Euploid	107.547
lib230524_CTATAGGAGTTACGTC-1	CTB	1	Aneuploid	112.118
lib230524_CTATAGGTCTATCGCC-1	STB	0.111717	Euploid	105.417
lib230524_CTATCCGAGCCATTGT-1	STB	0.174387	Euploid	45.0054
lib230524_CTATCCGAGGTCGTCC-1	HYPO	0.714286	Aneuploid	97.1263
lib230524_CTATCTAAGTCATGGG-1	STB	0.135081	Euploid	101.143
lib230524_CTATCTAGTGGATTTC-1	STB	0.714286	Aneuploid	108.224
lib230524_CTCAACCAGTTCTCTT-1	STB	0.262295	Euploid	150.081
lib230524_CTCAACCTCATTGAGC-1	STB	0.174387	Euploid	137.996
lib230524_CTCAAGACAAGCCTGC-1	CTB	0.837681	Aneuploid	67.3188
lib230524_CTCAAGACAATGCAGG-1	STB	0.394737	Euploid	104.491
lib230524_CTCAATTCAAAGACTA-1	STB	0.927536	Aneuploid	114.351
lib230524_CTCACTGAGGAGAGGC-1	CTB	0.111717	Euploid	96.5861
lib230524_CTCACTGGTGGCTGAA-1	CTB	0.837681	Aneuploid	98.8945
lib230524_CTCAGAAAGGAATCGC-1	STB	0.135081	Euploid	85.0878
lib230524_CTCAGAACAGATACTC-1	CTB	0.837681	Aneuploid	121.394
lib230524_CTCAGAACATCAACCA-1	EVT	0.927536	Aneuploid	183.821
lib230524_CTCAGTCAGGTCCGAA-1	EPI	0.365079	Euploid	64.552
lib230524_CTCATCGAGGCTTAGG-1	CTB	0.111717	Euploid	61.1192
lib230524_CTCATGCTCCAGCACG-1	STB	0.174387	Euploid	137.623
lib230524_CTCATTACAGCGTTTA-1	STB	0.262295	Euploid	113.173
lib230524_CTCATTATCCGCAGTG-1	STB	0.714286	Aneuploid	59.127
lib230524_CTCCAACTCGTGAGAG-1	CTB	1	Aneuploid	46.4901
lib230524_CTCCACAGTAAGATCA-1	EVT	0.927536	Aneuploid	75.7967
lib230524_CTCCCTCAGCGATCGA-1	STB	0.394737	Euploid	56.6924
lib230524_CTCCCTCAGTTAGTAG-1	STB	0.365079	Euploid	149.861
lib230524_CTCCGATAGAAGTCCG-1	STB	0.135081	Euploid	81.8619
lib230524_CTCCTTTAGATCCTAC-1	STB	0.41791	Euploid	105.547
lib230524_CTCCTTTAGTCATCGT-1	STB	1	Aneuploid	105.926
lib230524_CTCTCAGGTCAACACT-1	EVT	1	Aneuploid	109.966
lib230524_CTCTCAGTCCAAGCAT-1	CTB	1	Aneuploid	148.87
lib230524_CTCTCAGTCGACATCA-1	EVT	1	Aneuploid	79.4234
lib230524_CTCTCGACAAAGGATT-1	STB	0.714286	Aneuploid	116.926
lib230524_CTCTCGAGTATTTCGG-1	EVT	0.111717	Euploid	23.7755
lib230524_CTCTGGTTCATTCATC-1	STB	0.135081	Euploid	169.883
lib230524_CTCTGGTTCCGAGATT-1	STB	0.111717	Euploid	42.5199
lib230524_CTGAATGTCGACGAGA-1	STB	1	Aneuploid	102.728
lib230524_CTGAATGTCTACTTCA-1	STB	0.837681	Aneuploid	139.596
lib230524_CTGAGCGAGAGTGTTA-1	STB	0.714286	Aneuploid	75.3164
lib230524_CTGCAGGTCGCGCTGA-1	STB	0.714286	Aneuploid	121.293
lib230524_CTGCAGGTCTAGCCAA-1	STB	0.135081	Euploid	127.005
lib230524_CTGCATCAGGGTCTTT-1	STB	0.111717	Euploid	20.7821
lib230524_CTGCATCCAGAACTAA-1	CTB	0.41791	Euploid	109.085
lib230524_CTGCCTATCACGTAGT-1	STB	0.262295	Euploid	113.796
lib230524_CTGCGAGGTGCTGATT-1	STB	1	Aneuploid	117.723
lib230524_CTGCTCACAGCTCTGG-1	CTB	0.714286	Aneuploid	90.1633
lib230524_CTGGCAGCAACCGCTG-1	STB	0.111717	Euploid	69.662
lib230524_CTGGTCTAGTGATTCC-1	STB	0.714286	Aneuploid	194.91
lib230524_CTGGTCTTCAAGAGTA-1	CTB	0.174387	Euploid	62.9275
lib230524_CTGGTCTTCGGCGATC-1	CTB	0.837681	Aneuploid	154.731
lib230524_CTGGTCTTCTACTATC-1	EVT	0.111717	Euploid	46.0518
lib230524_CTGTACCAGACTTAAG-1	STB	0.111717	Euploid	56.6425
lib230524_CTGTAGACACTGATTG-1	CTB	0.111717	Euploid	82.9447
lib230524_CTGTGAAAGCCTCTCT-1	CTB	1	Aneuploid	185.654
lib230524_CTGTGAACAGGCCTGT-1	HYPO	0.714286	Aneuploid	111.012
lib230524_CTGTGAAGTAGTGCGA-1	EVT	1	Aneuploid	254.443
lib230524_CTTACCGAGATACATG-1	EPI	0.135081	Euploid	83.7825
lib230524_CTTCAATCAACACTAC-1	STB	0.321526	Euploid	79.9492
lib230524_CTTCAATGTCGCTTAA-1	EPI	0.714286	Aneuploid	93.7573
lib230524_CTTCAATGTCTGTGAT-1	STB	0.714286	Aneuploid	57.9817
lib230524_CTTCCGAAGTTGCCTA-1	STB	0.262295	Euploid	79.4103
lib230524_CTTCCGAGTTCTCCAC-1	CTB	0.837681	Aneuploid	73.2963
lib230524_CTTCCTTGTCCCAAAT-1	STB	1	Aneuploid	72.2159
lib230524_CTTCGGTGTGTTAGCT-1	STB	0.174387	Euploid	151.368
lib230524_CTTCTCTGTTTATGCG-1	CTB	1	Aneuploid	115.649
lib230524_CTTCTCTTCACGACTA-1	STB	1	Aneuploid	97.0173
lib230524_CTTGATTAGCCTCTGG-1	CTB	0.135081	Euploid	32.427
lib230524_CTTGATTGTTAGAAGT-1	EVT	0.174387	Euploid	72.7488
lib230524_CTTTCAAAGTAACCTC-1	STB	0.927536	Aneuploid	86.6534
lib230524_GAAGAATAGAGGTCGT-1	CTB	0.837681	Aneuploid	114.477
lib230524_GAAGAATTCCAAATGC-1	CTB	0.111717	Euploid	122.51
lib230524_GAAGAATTCCCTATTA-1	STB	1	Aneuploid	73.3449
lib230524_GAAGAATTCTCGTCGT-1	STB	0.714286	Aneuploid	128.567
lib230524_GAAGCCCGTCGCTTGG-1	CTB	0.135081	Euploid	63.976
lib230524_GAAGCGAGTAGCTCGC-1	STB	0.321526	Euploid	158.396
lib230524_GAAGGGTAGCCGTTAT-1	STB	1	Aneuploid	105.596
lib230524_GAAGGGTTCCGGGACT-1	STB	1	Aneuploid	74.5001
lib230524_GAAGTAACACCTATCC-1	CTB	0.837681	Aneuploid	89.1001
lib230524_GAAGTAAGTAGTACGG-1	STB	1	Aneuploid	142.271
lib230524_GAATCGTGTGTCCTAA-1	STB	0.927536	Aneuploid	59.9976
lib230524_GACACGCCACTCCTGT-1	EVT	0.714286	Aneuploid	150.472
lib230524_GACATCAGTAGCTCGC-1	STB	1	Aneuploid	172.02
lib230524_GACCCAGCATCAACCA-1	STB	0.714286	Aneuploid	31.1969
lib230524_GACCCAGTCGTGGGTC-1	STB	0.41791	Euploid	108.904
lib230524_GACCCTTTCAGCTTGA-1	STB	0.394737	Euploid	50.6721
lib230524_GACCGTGGTCAGACGA-1	STB	0.714286	Aneuploid	75.002
lib230524_GACCGTGGTTTGATCG-1	CTB	1	Aneuploid	104.128
lib230524_GACCTTCAGTTGCTCA-1	CTB	0.174387	Euploid	89.1396
lib230524_GACCTTCCAAGTGTCT-1	CTB	0.111717	Euploid	12.3536
lib230524_GACGCTGAGAGTCCGA-1	STB	0.41791	Euploid	79.112
lib230524_GACGCTGGTCGGTACC-1	CTB	0.262295	Euploid	122.139
lib230524_GACTCAAAGAGCCCAA-1	STB	0.394737	Euploid	59.9954
lib230524_GACTCAAGTATGCGTT-1	STB	0.111717	Euploid	106.184
lib230524_GACTCAAGTCCAACGC-1	CTB	1	Aneuploid	99.6276
lib230524_GACTCAAGTGCCGTAC-1	STB	0.111717	Euploid	17.8228
lib230524_GACTCAATCAAGAGTA-1	EVT	1	Aneuploid	61.0659
lib230524_GACTCTCAGGGATCTG-1	STB	1	Aneuploid	73.5025
lib230524_GACTGATAGCGATGGT-1	STB	0.927536	Aneuploid	141.022
lib230524_GACTGATCACAAGCCC-1	EVT	0.174387	Euploid	102.435
lib230524_GACTTCCCAGACAAAT-1	CTB	0.111717	Euploid	47.8546
lib230524_GAGAAATCAGGTTACT-1	CTB	0.174387	Euploid	141.32
lib230524_GAGACCCGTACCCGAC-1	STB	1	Aneuploid	103.593
lib230524_GAGACTTAGTGCACTT-1	CTB	0.837681	Aneuploid	98.0724
lib230524_GAGACTTCAATTTCGG-1	STB	0.321526	Euploid	58.3884
lib230524_GAGACTTCACCAGTTA-1	HYPO	0.174387	Euploid	195.074
lib230524_GAGAGGTAGCGTTCAT-1	CTB	0.365079	Euploid	91.5389
lib230524_GAGAGGTAGTGTAGAT-1	STB	1	Aneuploid	134.114
lib230524_GAGATGGCACTTGAGT-1	EPI	0.135081	Euploid	99.3106
lib230524_GAGCCTGTCCTGTACC-1	EPI	0.394737	Euploid	83.8723
lib230524_GAGGCCTAGACCAGAC-1	STB	0.714286	Aneuploid	49.307
lib230524_GAGGGATTCCACAGCG-1	STB	0.41791	Euploid	87.982
lib230524_GAGGGTAGTCTTGCTC-1	CTB	0.174387	Euploid	128.866
lib230524_GAGTCATGTACTTGTG-1	STB	0.135081	Euploid	126.405
lib230524_GAGTCTAAGTGACACG-1	STB	0.262295	Euploid	127.526
lib230524_GAGTCTACATCACAGT-1	STB	0.111717	Euploid	44.5113
lib230524_GAGTGAGTCGACGCTG-1	STB	0.111717	Euploid	32.4888
lib230524_GAGTGTTGTAACATCC-1	CTB	0.111717	Euploid	102.926
lib230524_GAGTTTGGTTTGAACC-1	CTB	1	Aneuploid	117.899
lib230524_GATAGAATCTTCGTGC-1	CTB	0.174387	Euploid	111.137
lib230524_GATCAGTGTGGTCTTA-1	STB	1	Aneuploid	77.7489
lib230524_GATCATGAGCGTCAAG-1	CTB	0.111717	Euploid	95.2575
lib230524_GATCCCTCACTGCGTG-1	EVT	0.837681	Aneuploid	197.404
lib230524_GATGACTCAATCCAGT-1	STB	0.262295	Euploid	116.766
lib230524_GATGACTGTAATGTGA-1	STB	0.111717	Euploid	124.003
lib230524_GATGACTGTCTTTATC-1	STB	0.236842	Euploid	51.6606
lib230524_GATGATCAGGAGTCTG-1	CTB	1	Aneuploid	103.76
lib230524_GATGCTAAGCTGGCTC-1	CTB	0.111717	Euploid	107.387
lib230524_GATGCTACAGTTACCA-1	STB	0.111717	Euploid	19.5561
lib230524_GATGGAGAGGCATGGT-1	STB	0.135081	Euploid	102.96
lib230524_GATGGAGCAGGATGAC-1	CTB	0.927536	Aneuploid	96.6029
lib230524_GATGTTGCAAGCTACT-1	STB	0.111717	Euploid	101.075
lib230524_GATGTTGCACCGTGAC-1	EVT	0.111717	Euploid	109.959
lib230524_GATTTCTAGCCAAGGT-1	EPI	0.365079	Euploid	122.637
lib230524_GATTTCTAGCGCCTAC-1	EVT	0.837681	Aneuploid	129.186
lib230524_GATTTCTGTAGACGTG-1	STB	1	Aneuploid	109.288
lib230524_GATTTCTGTATCGTTG-1	STB	1	Aneuploid	29.12
lib230524_GCAACATGTCTTGAGT-1	CTB	1	Aneuploid	138.842
lib230524_GCAACATGTTAGAGAT-1	EVT	0.365079	Euploid	78.9339
lib230524_GCAACATTCACTAGCA-1	CTB	0.262295	Euploid	57.8745
lib230524_GCAACCGCACCAGACC-1	STB	1	Aneuploid	66.9687
lib230524_GCACATATCGTCGGGT-1	CTB	1	Aneuploid	79.0351
lib230524_GCACGTGAGGCTTCCG-1	STB	1	Aneuploid	35.0831
lib230524_GCACGTGCAATCGCAT-1	EVT	1	Aneuploid	38.6602
lib230524_GCAGCCACATCAACCA-1	CTB	1	Aneuploid	83.9128
lib230524_GCAGGCTTCGAGATGG-1	CTB	0.714286	Aneuploid	103.935
lib230524_GCAGTTATCCGATCGG-1	EVT	1	Aneuploid	120.956
lib230524_GCATCGGCACCAGTAT-1	CTB	0.714286	Aneuploid	107.216
lib230524_GCATGATAGGGCAGAG-1	EVT	0.135081	Euploid	176.129
lib230524_GCATTAGGTTAGCGGA-1	CTB	0.174387	Euploid	103.19
lib230524_GCCAGCATCACGTCCT-1	STB	0.135081	Euploid	140.827
lib230524_GCCAGGTAGTAAACGT-1	STB	0.714286	Aneuploid	106.476
lib230524_GCCAGTGAGCCGATAG-1	STB	0.321526	Euploid	116.385
lib230524_GCCAGTGTCCTTCACG-1	STB	0.135081	Euploid	107.183
lib230524_GCCAGTGTCTACGGTA-1	STB	0.174387	Euploid	125.768
lib230524_GCCATGGAGCCTGAGA-1	EVT	1	Aneuploid	249.68
lib230524_GCCATTCCAAATGAAC-1	EVT	0.111717	Euploid	84.3207
lib230524_GCCCAGACACCGAATT-1	STB	0.714286	Aneuploid	73.5471
lib230524_GCCCGAAAGACGCTCC-1	STB	1	Aneuploid	50.3791
lib230524_GCCCGAACAATTGCAC-1	STB	0.927536	Aneuploid	73.1604
lib230524_GCGAGAAAGCCAAGGT-1	STB	0.321526	Euploid	83.0219
lib230524_GCGGATCGTTCGATTG-1	STB	0.262295	Euploid	85.4768
lib230524_GCGTGCATCCCAAGCG-1	EPI	0.365079	Euploid	83.5362
lib230524_GCTACAAAGACGTCCC-1	STB	0.927536	Aneuploid	70.8849
lib230524_GCTACCTCAGCAGATG-1	STB	0.111717	Euploid	86.1912
lib230524_GCTACCTGTATTCTCT-1	STB	0.262295	Euploid	112.215
lib230524_GCTCAAACAATGACCT-1	STB	0.714286	Aneuploid	111.791
lib230524_GCTCAAACAGCGAGTA-1	STB	0.111717	Euploid	60.079
lib230524_GCTTCACCACACGCCA-1	STB	0.714286	Aneuploid	97.7267
lib230524_GCTTGGGGTGTTCCAA-1	EVT	1	Aneuploid	85.2041
lib230524_GGAAGTGGTACCCGCA-1	CTB	1	Aneuploid	106.226
lib230524_GGAATGGAGGAAGAAC-1	EVT	0.837681	Aneuploid	74.8427
lib230524_GGACGTCAGCTACTAC-1	EVT	0.41791	Euploid	147.456
lib230524_GGAGATGGTGAACCGA-1	CTB	0.837681	Aneuploid	91.5338
lib230524_GGAGCAAAGAGTGTTA-1	STB	0.41791	Euploid	59.7574
lib230524_GGATGTTCAAAGCACG-1	CTB	0.111717	Euploid	55.2761
lib230524_GGCGTCAGTCATAACC-1	STB	1	Aneuploid	111.896
lib230524_GGCTTGGTCGTGACTA-1	STB	0.714286	Aneuploid	77.9212
lib230524_GGCTTTCCAATTGCCA-1	STB	0.262295	Euploid	99.939
lib230524_GGGAAGTGTTGGGATG-1	STB	0.135081	Euploid	86.2791
lib230524_GGGACCTCAGAGTTGG-1	STB	0.321526	Euploid	76.4527
lib230524_GGGAGATGTTGCTCGG-1	EPI	0.837681	Aneuploid	73.1422
lib230524_GGGCCATTCCTAAACG-1	CTB	0.111717	Euploid	80.3675
lib230524_GGGCTACAGAAATTGC-1	EVT	1	Aneuploid	313.024
lib230524_GGGCTACTCTGTCGTC-1	STB	1	Aneuploid	113.841
lib230524_GGGTAGAGTATGAGCG-1	CTB	0.837681	Aneuploid	115.925
lib230524_GGGTAGAGTGCAACAG-1	CTB	0.927536	Aneuploid	138.991
lib230524_GGGTCACCAGGTGTTT-1	STB	0.394737	Euploid	101.887
lib230524_GGGTCACTCCTCATAT-1	STB	1	Aneuploid	84.9719
lib230524_GGGTGAAGTTGTCAGT-1	STB	0.714286	Aneuploid	84.5844
lib230524_GGGTGTCTCCAAATGC-1	STB	1	Aneuploid	134.241
lib230524_GGGTTTAGTGAGCTCC-1	EVT	0.837681	Aneuploid	86.5064
lib230524_GGGTTTATCCATAAGC-1	STB	1	Aneuploid	150.971
lib230524_GGGTTTATCCTCTAGC-1	STB	1	Aneuploid	36.6728
lib230524_GGTCACGGTATAATGG-1	CTB	0.714286	Aneuploid	116.818
lib230524_GGTGGCTCATAGGAGC-1	STB	0.321526	Euploid	69.7186
lib230524_GGTGGCTCATTGACAC-1	EVT	0.714286	Aneuploid	74.1161
lib230524_GGTGTCGAGCGGTAGT-1	STB	0.927536	Aneuploid	75.8662
lib230524_GGTGTCGCAATGCTCA-1	STB	0.394737	Euploid	118
lib230524_GGTGTCGCATGATGCT-1	EVT	0.41791	Euploid	90.9365
lib230524_GGTGTTATCAAGCCGC-1	STB	1	Aneuploid	105.793
lib230524_GGTGTTATCCCTCATG-1	CTB	0.714286	Aneuploid	97.4476
lib230524_GGTTAACGTCGATGCC-1	CTB	0.321526	Euploid	111.937
lib230524_GGTTAACTCTCGCTCA-1	EVT	0.111717	Euploid	111.344
lib230524_GGTTCTCCAAGATGTA-1	EPI	0.236842	Euploid	20.4363
lib230524_GGTTCTCCAGGTGTTT-1	EVT	0.837681	Aneuploid	95.8452
lib230524_GGTTCTCGTTGCACGC-1	CTB	0.321526	Euploid	122.734
lib230524_GGTTGTACAGCCGTCA-1	HYPO	0.927536	Aneuploid	137.009
lib230524_GGTTGTATCAGAGTTC-1	STB	0.394737	Euploid	57.5026
lib230524_GTACAACCATGACGGA-1	EVT	1	Aneuploid	62.9071
lib230524_GTACAGTAGGGACTGT-1	STB	0.111717	Euploid	60.407
lib230524_GTACAGTGTGGTCAAG-1	STB	0.41791	Euploid	52.6715
lib230524_GTAGAGGAGCATGAAT-1	CTB	0.714286	Aneuploid	67.0926
lib230524_GTAGAGGCACGGCGTT-1	STB	0.135081	Euploid	122.123
lib230524_GTAGAGGCAGTCACGC-1	STB	1	Aneuploid	102.019
lib230524_GTAGAGGTCTCTTGCG-1	CTB	0.111717	Euploid	53.6373
lib230524_GTAGATCGTTATGTGC-1	STB	0.394737	Euploid	90.6455
lib230524_GTAGGAGTCATTATCC-1	STB	0.394737	Euploid	93.1835
lib230524_GTATTGGAGACCATTC-1	STB	0.394737	Euploid	72.02
lib230524_GTCAAGTCACAAATGA-1	STB	0.111717	Euploid	25.532
lib230524_GTCAAGTTCCTGATAG-1	STB	0.174387	Euploid	61.0123
lib230524_GTCAAGTTCGTGACTA-1	STB	0.714286	Aneuploid	66.8386
lib230524_GTCACGGAGCAGTAAT-1	STB	0.135081	Euploid	75.7284
lib230524_GTCACGGTCGAAGCAG-1	STB	0.394737	Euploid	53.9713
lib230524_GTCACTCCAATGTGGG-1	CTB	0.111717	Euploid	85.2953
lib230524_GTCATCCAGGTAGTCG-1	STB	1	Aneuploid	79.0303
lib230524_GTCATCCTCTTCTGGC-1	STB	1	Aneuploid	137.472
lib230524_GTCATGAAGGGCGAGA-1	STB	0.111717	Euploid	51.905
lib230524_GTCCACTGTTCACGAT-1	CTB	0.262295	Euploid	113.651
lib230524_GTCCCATGTACAGCGA-1	STB	0.927536	Aneuploid	57.9493
lib230524_GTCCCATGTCGCTTAA-1	STB	1	Aneuploid	138.509
lib230524_GTCCTCAAGCAGCGAT-1	STB	1	Aneuploid	56.605
lib230524_GTCCTCACACGAAAGC-1	CTB	0.41791	Euploid	113.013
lib230524_GTCCTCATCGACCATA-1	STB	0.111717	Euploid	35.8981
lib230524_GTCGAATCAGTAGAAT-1	STB	0.394737	Euploid	58.3835
lib230524_GTCGAATTCTCGCCTA-1	STB	0.714286	Aneuploid	50.3601
lib230524_GTCGCGACAAGAGCTG-1	STB	0.262295	Euploid	62.919
lib230524_GTCGCGAGTCCATCTC-1	CTB	1	Aneuploid	123.106
lib230524_GTCGTTCCACATTGTG-1	STB	0.135081	Euploid	95.6339
lib230524_GTCGTTCGTGACTGAG-1	STB	0.135081	Euploid	66.5835
lib230524_GTCTCACGTCGCTTGG-1	STB	0.111717	Euploid	66.5013
lib230524_GTCTGTCTCAAATGAG-1	EVT	1	Aneuploid	73.0055
lib230524_GTGACGCTCGACATCA-1	STB	0.111717	Euploid	28.418
lib230524_GTGAGCCAGGTCCCGT-1	STB	0.394737	Euploid	110.386
lib230524_GTGCAGCTCGTTCCTG-1	EVT	0.174387	Euploid	127.896
lib230524_GTGCAGCTCTCTCCGA-1	STB	1	Aneuploid	107.098
lib230524_GTGCTTCTCTCGGTAA-1	EPI	0.111717	Euploid	85.1646
lib230524_GTGGAGAGTGTTAGCT-1	CTB	1	Aneuploid	74.9127
lib230524_GTGTAACCAGGCTCTG-1	CTB	1	Aneuploid	152.287
lib230524_GTGTGATAGTCACTAC-1	CTB	1	Aneuploid	97.0807
lib230524_GTGTTAGGTCCAGAAG-1	STB	0.135081	Euploid	60.0673
lib230524_GTTACCCTCCGACGGT-1	EVT	1	Aneuploid	100.44
lib230524_GTTACGACACACGTGC-1	STB	0.394737	Euploid	74.4893
lib230524_GTTACGACACTAGGCC-1	EVT	0.236842	Euploid	123.575
lib230524_GTTCATTAGCTATCCA-1	CTB	0.927536	Aneuploid	141.977
lib230524_GTTCATTCAGATCCAT-1	EVT	1	Aneuploid	304.228
lib230524_GTTCATTTCGGTCAGC-1	EVT	0.714286	Aneuploid	50.6676
lib230524_GTTCCGTCAGATTCGT-1	STB	0.714286	Aneuploid	76.4171
lib230524_GTTCGCTCACTTGTGA-1	EVT	0.714286	Aneuploid	52.5124
lib230524_GTTGAACAGAGCCATG-1	STB	0.135081	Euploid	138.595
lib230524_GTTGCTCTCATAGAGA-1	STB	0.394737	Euploid	97.1974
lib230524_GTTGTCCCAAAGACTA-1	STB	0.394737	Euploid	94.3963
lib230524_GTTGTGATCTGAGAAA-1	CTB	1	Aneuploid	109.664
lib230524_GTTTACTAGCCATTCA-1	EPI	0.111717	Euploid	93.0871
lib230524_GTTTGGACAGGCGTTC-1	CTB	0.837681	Aneuploid	165.255
lib230524_GTTTGGATCCCTTTGG-1	STB	0.394737	Euploid	91.7996
lib230524_TAACACGGTTCCTAGA-1	CTB	1	Aneuploid	127.564
lib230524_TAACGACAGTTCCATG-1	CTB	0.714286	Aneuploid	80.8135
lib230524_TAACGACTCTGAGAGG-1	STB	0.135081	Euploid	59.5209
lib230524_TAAGCACAGCATTTGC-1	CTB	0.837681	Aneuploid	108.078
lib230524_TAAGCCAGTGTAGTGG-1	CTB	1	Aneuploid	131.879
lib230524_TAAGCGTCAGACACAG-1	STB	0.174387	Euploid	79.5815
lib230524_TAAGCGTTCTCTCAAT-1	STB	0.111717	Euploid	77.0889
lib230524_TAAGTCGCAATTCACG-1	STB	0.135081	Euploid	89.4089
lib230524_TAATCTCAGAGTCCGA-1	EVT	0.262295	Euploid	142.695
lib230524_TAATCTCAGGTACCTT-1	STB	0.111717	Euploid	42.6156
lib230524_TAATTCCCAGCAGGAT-1	STB	1	Aneuploid	117.389
lib230524_TACAACGAGGTAAGAG-1	STB	0.111717	Euploid	49.2815
lib230524_TACAACGCATGGGTCC-1	STB	0.111717	Euploid	51.3701
lib230524_TACAACGTCTTCTGGC-1	STB	0.394737	Euploid	50.3532
lib230524_TACACCCTCGGCTGAC-1	CTB	0.174387	Euploid	114.947
lib230524_TACCCGTTCTGCATGA-1	EPI	0.714286	Aneuploid	149.924
lib230524_TACCGAAAGGGTATAT-1	EVT	0.262295	Euploid	118.55
lib230524_TACCGAACAACCAATC-1	STB	0.714286	Aneuploid	137.554
lib230524_TACGCTCCATCAACCA-1	STB	0.714286	Aneuploid	111.458
lib230524_TACGCTCCATGACGAG-1	EVT	0.111717	Euploid	26.0475
lib230524_TACGGGCAGCTAGCCC-1	STB	0.321526	Euploid	63.7991
lib230524_TACGGGCGTGCGGATA-1	STB	0.41791	Euploid	169.093
lib230524_TACGGTATCCGCCTAT-1	EVT	0.837681	Aneuploid	115.097
lib230524_TACGTCCCATTGAGCT-1	CTB	1	Aneuploid	97.5938
lib230524_TACGTCCTCAAATAGG-1	STB	0.111717	Euploid	58.698
lib230524_TACGTCCTCCACTTTA-1	STB	0.236842	Euploid	195.334
lib230524_TACGTCCTCGCCTATC-1	STB	0.135081	Euploid	34.4875
lib230524_TACGTCCTCTACCCAC-1	STB	0.714286	Aneuploid	89.2794
lib230524_TACTGCCAGTCACTGT-1	STB	0.135081	Euploid	109.952
lib230524_TACTGCCTCGCCAACG-1	CTB	1	Aneuploid	72.5174
lib230524_TACTTCATCGTGCGAC-1	STB	0.394737	Euploid	42.4506
lib230524_TACTTGTAGTCTAGAA-1	CTB	1	Aneuploid	97.6026
lib230524_TAGAGTCTCGATCCCT-1	STB	0.321526	Euploid	72.1588
lib230524_TAGATCGCACATACGT-1	EPI	1	Aneuploid	204.708
lib230524_TAGCACAGTCCGGTGT-1	EVT	1	Aneuploid	59.3464
lib230524_TAGGAGGTCATCAGTG-1	STB	0.394737	Euploid	79.3452
lib230524_TAGGTACAGGTTCTAC-1	STB	0.321526	Euploid	59.3835
lib230524_TAGGTACGTGAGGAAA-1	CTB	0.174387	Euploid	145.766
lib230524_TAGGTTGAGCACTTTG-1	STB	0.135081	Euploid	98.0853
lib230524_TAGTGCAGTTACCTGA-1	STB	0.394737	Euploid	119.893
lib230524_TATACCTAGGATTACA-1	CTB	0.174387	Euploid	105.791
lib230524_TATACCTAGGCTCTAT-1	STB	0.135081	Euploid	41.8613
lib230524_TATCAGGAGGAGAGGC-1	EVT	1	Aneuploid	35.6787
lib230524_TATCCTACACTGATTG-1	CTB	0.927536	Aneuploid	127.02
lib230524_TATCCTACAGTTACCA-1	STB	0.111717	Euploid	23.1408
lib230524_TATCTGTCAGACAATA-1	STB	0.41791	Euploid	109.246
lib230524_TATCTGTCATGACTAC-1	STB	0.135081	Euploid	65.1606
lib230524_TATCTGTTCCCTCGAT-1	STB	0.135081	Euploid	145.993
lib230524_TATGTTCAGACCTTTG-1	EVT	1	Aneuploid	35.4607
lib230524_TATTGCTAGCCTGACC-1	STB	0.135081	Euploid	136.274
lib230524_TATTGGGAGTGGTGAC-1	STB	0.111717	Euploid	14.2713
lib230524_TATTGGGCAGCTTTGA-1	STB	0.174387	Euploid	33.5306
lib230524_TATTTCGGTGTTCCTC-1	EVT	0.262295	Euploid	141.787
lib230524_TCAAGCACAGCTGAAG-1	STB	1	Aneuploid	106.457
lib230524_TCAATCTCACCAAATC-1	STB	0.262295	Euploid	89.3524
lib230524_TCAATTCAGGGATCAC-1	CTB	0.174387	Euploid	102.558
lib230524_TCAATTCCAAGGCCTC-1	STB	0.394737	Euploid	78.7801
lib230524_TCAATTCTCGCGTCGA-1	CTB	0.174387	Euploid	200.866
lib230524_TCACATTGTATCGCAT-1	EVT	0.714286	Aneuploid	93.7222
lib230524_TCACGGGAGCATCAAA-1	CTB	1	Aneuploid	133.856
lib230524_TCACTATAGACTCGAG-1	CTB	0.111717	Euploid	71.3508
lib230524_TCAGGTACATCTGGGC-1	CTB	1	Aneuploid	39.278
lib230524_TCAGTCCAGTCATGCT-1	CTB	1	Aneuploid	159.093
lib230524_TCAGTCCGTCTTCTAT-1	CTB	1	Aneuploid	133.813
lib230524_TCAGTGACACCCTGAG-1	EVT	1	Aneuploid	67.81
lib230524_TCAGTTTAGGGCAATC-1	HYPO	0.927536	Aneuploid	160.896
lib230524_TCATACTAGGATCATA-1	STB	1	Aneuploid	96.428
lib230524_TCATACTGTTCAGTAC-1	EVT	0.927536	Aneuploid	242.112
lib230524_TCATATCTCAAGATAG-1	EVT	0.135081	Euploid	23.6512
lib230524_TCATCATCACGGTGAA-1	CTB	0.174387	Euploid	104.413
lib230524_TCATCATGTGGAACAC-1	EVT	0.135081	Euploid	166.403
lib230524_TCATCCGAGGACTATA-1	EVT	0.927536	Aneuploid	231.738
lib230524_TCATCCGCAGACAATA-1	EVT	0.111717	Euploid	52.9474
lib230524_TCATGAGCATAGGCGA-1	CTB	0.174387	Euploid	100.938
lib230524_TCATGAGGTTAGTCGT-1	CTB	0.927536	Aneuploid	106.012
lib230524_TCATTCAAGCAAATGT-1	CTB	0.174387	Euploid	94.9131
lib230524_TCATTGTAGTTAGTGA-1	STB	0.262295	Euploid	83.4589
lib230524_TCATTGTCACAACATC-1	STB	1	Aneuploid	62.8797
lib230524_TCATTGTCACTTGACA-1	STB	1	Aneuploid	101.206
lib230524_TCATTGTCATGAATAG-1	STB	0.394737	Euploid	81.5881
lib230524_TCCACCAGTCAGGTGA-1	STB	0.174387	Euploid	22.8593
lib230524_TCCACGTCATCGATCA-1	STB	0.262295	Euploid	70.0123
lib230524_TCCATGCCATGACTAC-1	STB	0.394737	Euploid	73.9718
lib230524_TCCATGCTCATCGCCT-1	STB	1	Aneuploid	128.488
lib230524_TCCCACAAGATCGCTT-1	CTB	0.174387	Euploid	86.4853
lib230524_TCCCAGTAGGTACAGC-1	STB	1	Aneuploid	76.2967
lib230524_TCCCAGTCAGACGGAT-1	STB	0.111717	Euploid	86.3123
lib230524_TCCCAGTGTTTCGTTT-1	STB	0.321526	Euploid	105.668
lib230524_TCCCATGCACAGTACT-1	STB	0.174387	Euploid	71.5748
lib230524_TCCCATGTCACACCGG-1	CTB	0.111717	Euploid	87.8319
lib230524_TCCGAAAGTTCTTCAT-1	CTB	0.365079	Euploid	113.121
lib230524_TCCGATCCAGCAGAAC-1	STB	0.394737	Euploid	76.5239
lib230524_TCCGATCTCCCTCTTT-1	STB	0.41791	Euploid	78.9602
lib230524_TCCGATCTCGGAAGGT-1	CTB	0.714286	Aneuploid	91.1904
lib230524_TCCGGGACACTTGAAC-1	STB	0.135081	Euploid	54.2891
lib230524_TCCTAATAGCCAAGTG-1	STB	0.135081	Euploid	80.2151
lib230524_TCCTCCCGTAGGAGTC-1	EVT	0.262295	Euploid	126.489
lib230524_TCCTCCCGTCGATGCC-1	CTB	1	Aneuploid	135.506
lib230524_TCCTCGAAGTTTGTCG-1	STB	1	Aneuploid	122.496
lib230524_TCCTCGACAGCCATTA-1	CTB	1	Aneuploid	103.202
lib230524_TCCTCGAGTTCCACGG-1	STB	1	Aneuploid	148.784
lib230524_TCCTCTTGTGAGTAAT-1	CTB	0.135081	Euploid	88.0213
lib230524_TCCTCTTTCCGTCACT-1	STB	1	Aneuploid	35.1664
lib230524_TCCTGCAGTGCCTTTC-1	CTB	0.714286	Aneuploid	159.725
lib230524_TCCTTCTGTGAACGGT-1	CTB	0.714286	Aneuploid	72.2928
lib230524_TCCTTTCGTATCGAAA-1	STB	0.394737	Euploid	136.31
lib230524_TCGAACAGTCATCGGC-1	CTB	0.174387	Euploid	86.9694
lib230524_TCGAACATCTATACTC-1	CTB	0.174387	Euploid	123.727
lib230524_TCGAAGTCAGTTTCAG-1	EVT	0.714286	Aneuploid	41.6184
lib230524_TCGAAGTTCTGGCCTT-1	CTB	0.837681	Aneuploid	78.7028
lib230524_TCGACCTGTGAACGGT-1	CTB	1	Aneuploid	73.4564
lib230524_TCGACGGTCTAGTACG-1	EVT	0.135081	Euploid	18.6976
lib230524_TCGATTTCACCGTGAC-1	STB	0.174387	Euploid	148.505
lib230524_TCGCAGGCAGTCTCTC-1	STB	0.714286	Aneuploid	82.7841
lib230524_TCGCTCATCATCCTGC-1	STB	1	Aneuploid	107.377
lib230524_TCGCTTGCAAAGGAGA-1	STB	0.135081	Euploid	96.9898
lib230524_TCGGATACATCCGATA-1	STB	1	Aneuploid	86.0989
lib230524_TCGGATAGTCCACACG-1	CTB	1	Aneuploid	142.249
lib230524_TCGGGCACAACACACT-1	STB	1	Aneuploid	83.5252
lib230524_TCGGGTGCATAATGAG-1	CTB	0.837681	Aneuploid	128.944
lib230524_TCGGTCTGTGTGTCCG-1	CTB	1	Aneuploid	106.795
lib230524_TCGTCCAGTTGCATGT-1	CTB	0.394737	Euploid	174.534
lib230524_TCTAACTGTCATCTAG-1	EVT	1	Aneuploid	337.036
lib230524_TCTACATGTGATCATC-1	STB	0.394737	Euploid	80.6289
lib230524_TCTATACGTGGCAACA-1	STB	0.111717	Euploid	44.466
lib230524_TCTATACTCCATAGAC-1	EVT	0.236842	Euploid	142.344
lib230524_TCTATCAAGCCATTTG-1	STB	0.714286	Aneuploid	88.3278
lib230524_TCTCTGGTCTCCAATT-1	STB	0.135081	Euploid	109.436
lib230524_TCTGCCACATTCTCTA-1	CTB	0.927536	Aneuploid	110.043
lib230524_TCTGGCTAGGTCCCTG-1	CTB	1	Aneuploid	117.44
lib230524_TCTGTCGCACATACTG-1	STB	0.41791	Euploid	63.3554
lib230524_TCTGTCGCACTCCGGA-1	CTB	0.837681	Aneuploid	127.937
lib230524_TCTGTCGCAGCCTATA-1	STB	0.714286	Aneuploid	101.796
lib230524_TCTTGCGCACGCTTAA-1	EVT	0.365079	Euploid	50.8999
lib230524_TCTTGCGGTCGCTTAA-1	EVT	1	Aneuploid	45.5088
lib230524_TCTTTGAAGCCTTCTC-1	STB	0.135081	Euploid	152.197
lib230524_TGAACGTAGTTTCGAC-1	STB	1	Aneuploid	68.7595
lib230524_TGAACGTTCGGCCCAA-1	EVT	0.837681	Aneuploid	56.5419
lib230524_TGAACGTTCGGTCATA-1	STB	0.135081	Euploid	59.4746
lib230524_TGAATGCCACGGCACT-1	EVT	0.927536	Aneuploid	150.176
lib230524_TGACAGTGTTCTTAGG-1	STB	0.174387	Euploid	108.781
lib230524_TGACAGTTCCTACGGG-1	EVT	1	Aneuploid	268.391
lib230524_TGACCCTTCCGGGACT-1	STB	0.41791	Euploid	196.684
lib230524_TGACGCGCATCCAACA-1	CTB	0.174387	Euploid	129.2
lib230524_TGACTCCCAATGAGCG-1	STB	0.321526	Euploid	111.13
lib230524_TGAGACTCAATGCTCA-1	STB	0.262295	Euploid	115.422
lib230524_TGAGACTCATCGGAGA-1	STB	0.135081	Euploid	92.5374
lib230524_TGAGACTGTCTCGGAC-1	STB	1	Aneuploid	47.4026
lib230524_TGAGACTTCCTACCAC-1	STB	0.394737	Euploid	58.6351
lib230524_TGAGCGCAGCCTGACC-1	CTB	1	Aneuploid	43.9547
lib230524_TGAGCGCTCCGGACTG-1	EVT	0.714286	Aneuploid	187.511
lib230524_TGAGCGCTCGACCAAT-1	CTB	0.714286	Aneuploid	101.114
lib230524_TGAGGAGCAGACGGAT-1	HYPO	0.174387	Euploid	41.8591
lib230524_TGAGGGAAGGCTTAAA-1	CTB	1	Aneuploid	108.089
lib230524_TGAGGGACATAGATCC-1	EVT	0.837681	Aneuploid	87.71
lib230524_TGAGGGATCTTTGATC-1	STB	0.174387	Euploid	56.7681
lib230524_TGATCAGGTGTCTTCC-1	CTB	0.394737	Euploid	13.4983
lib230524_TGATCTTAGCAAACAT-1	STB	0.394737	Euploid	67.3858
lib230524_TGATCTTCAGTATTCG-1	STB	1	Aneuploid	111.885
lib230524_TGATCTTTCGGTAGGA-1	CTB	0.837681	Aneuploid	114.092
lib230524_TGATGCAAGCACACCC-1	STB	0.714286	Aneuploid	61.1812
lib230524_TGATGCACATCATCCC-1	CTB	0.111717	Euploid	109.771
lib230524_TGATGGTTCCACTGAA-1	CTB	0.111717	Euploid	45.764
lib230524_TGATTCTAGCTGCCTG-1	STB	0.394737	Euploid	64.9219
lib230524_TGATTTCCACAGTGTT-1	STB	0.321526	Euploid	91.8624
lib230524_TGCAGATCAATCCTTT-1	EPI	0.927536	Aneuploid	156.677
lib230524_TGCAGGCCAAGAGATT-1	STB	0.174387	Euploid	102.087
lib230524_TGCAGTATCCCGTTCA-1	CTB	0.174387	Euploid	120.576
lib230524_TGCCGAGAGAACTCCT-1	EVT	0.174387	Euploid	67.1075
lib230524_TGCGACGGTGAGGCAT-1	EVT	0.174387	Euploid	61.8006
lib230524_TGGAACTCATGACGAG-1	CTB	1	Aneuploid	161.219
lib230524_TGGAACTTCGGTCTGG-1	STB	0.111717	Euploid	39.1582
lib230524_TGGAGAGAGCACTCGC-1	CTB	0.174387	Euploid	84.2716
lib230524_TGGAGGAAGGCAGCTA-1	STB	0.135081	Euploid	150.198
lib230524_TGGATCAGTAGGTGCA-1	STB	0.321526	Euploid	110.679
lib230524_TGGATCATCCTCACGT-1	STB	1	Aneuploid	127.487
lib230524_TGGATGTCATCCCACT-1	STB	0.41791	Euploid	59.4018
lib230524_TGGCGTGGTCCAGTTA-1	STB	0.236842	Euploid	75.2501
lib230524_TGGGATTTCACCGACG-1	EVT	0.111717	Euploid	28.3743
lib230524_TGGTGATGTTTATGCG-1	STB	1	Aneuploid	83.807
lib230524_TGTAACGAGATGAACT-1	STB	1	Aneuploid	112.188
lib230524_TGTAACGAGTTTAGGA-1	STB	0.135081	Euploid	85.2923
lib230524_TGTACAGCACTACACA-1	STB	0.111717	Euploid	47.0617
lib230524_TGTCAGACAATGCTCA-1	STB	0.927536	Aneuploid	90.8916
lib230524_TGTCAGACAGTACTAC-1	STB	0.714286	Aneuploid	88.4077
lib230524_TGTCCACAGCATGCAG-1	EVT	1	Aneuploid	46.9549
lib230524_TGTCCACAGTAGCCAG-1	STB	1	Aneuploid	82.5486
lib230524_TGTCCACCATCTAGAC-1	STB	0.837681	Aneuploid	116.741
lib230524_TGTGTGAGTAGTAAGT-1	STB	0.111717	Euploid	25.3547
lib230524_TGTTACTAGAGAACCC-1	EVT	0.41791	Euploid	47.5993
lib230524_TGTTACTCATTGGATC-1	EPI	0.365079	Euploid	98.8805
lib230524_TGTTCATAGAAGGCTC-1	CTB	0.135081	Euploid	92.3534
lib230524_TGTTCCGCAAGTGGGT-1	STB	0.714286	Aneuploid	108.026
lib230524_TGTTGAGAGACCTCAT-1	STB	0.41791	Euploid	45.7674
lib230524_TGTTGGATCCATTTAC-1	STB	0.135081	Euploid	125.881
lib230524_TTACAGGAGGTTATAG-1	STB	0	Euploid	72.402
lib230524_TTACCATAGCCTGCCA-1	STB	0.174387	Euploid	122.924
lib230524_TTACCATTCTACTATC-1	CTB	0.365079	Euploid	66.2427
lib230524_TTACCGCAGGATTACA-1	EVT	0.174387	Euploid	75.4745
lib230524_TTACGCCCAGCTTTGA-1	STB	0.262295	Euploid	114.711
lib230524_TTACGTTAGTTTCGGT-1	STB	0.135081	Euploid	92.4265
lib230524_TTAGGCAAGACATCCT-1	CTB	0.714286	Aneuploid	129.137
lib230524_TTAGGGTAGTACCCTA-1	STB	0.927536	Aneuploid	158.023
lib230524_TTAGTCTTCCTTCGAC-1	EVT	0.714286	Aneuploid	94.2785
lib230524_TTATTGCAGGGACAGG-1	STB	0.174387	Euploid	127.002
lib230524_TTATTGCCAGCTGTCG-1	EVT	1	Aneuploid	181.293
lib230524_TTATTGCTCCTCGCAT-1	CTB	0.837681	Aneuploid	116.684
lib230524_TTCAATCAGACGGAAA-1	STB	0.135081	Euploid	80.0366
lib230524_TTCAATCGTGTATACC-1	STB	0.135081	Euploid	59.7852
lib230524_TTCAATCTCATTGCGA-1	EVT	0.365079	Euploid	99.0875
lib230524_TTCAATCTCTCAAAGC-1	EVT	0.714286	Aneuploid	50.6601
lib230524_TTCACCGGTATTAAGG-1	CTB	1	Aneuploid	67.6602
lib230524_TTCACGCCACAGAGCA-1	STB	0.321526	Euploid	59.1538
lib230524_TTCACGCGTCTCGGGT-1	CTB	0.111717	Euploid	49.468
lib230524_TTCATTGAGGACTTCT-1	STB	0.41791	Euploid	38.6495
lib230524_TTCCAATAGTCGAAGC-1	STB	0.111717	Euploid	75.8173
lib230524_TTCCACGAGACTAAGT-1	STB	1	Aneuploid	101.189
lib230524_TTCCGTGAGACAACAT-1	STB	0.927536	Aneuploid	115.82
lib230524_TTCCGTGGTTGTAGCT-1	STB	0.321526	Euploid	76.3166
lib230524_TTCCTAAAGCGGGTAT-1	STB	1	Aneuploid	131.26
lib230524_TTCCTAACACACCTGG-1	CTB	0.365079	Euploid	105.462
lib230524_TTCCTCTTCATACGGT-1	STB	0.714286	Aneuploid	60.8442
lib230524_TTCCTTCTCCATTTCA-1	STB	0.714286	Aneuploid	124.705
lib230524_TTCGATTGTCATAACC-1	EPI	0.837681	Aneuploid	123.483
lib230524_TTCGGTCGTTGTCCCT-1	STB	0.262295	Euploid	95.0633
lib230524_TTCTAACCAGCTTTCC-1	STB	0.394737	Euploid	64.8929
lib230524_TTCTAACGTGACTCTA-1	STB	0.262295	Euploid	67.9045
lib230524_TTCTAGTGTATAGGAT-1	STB	1	Aneuploid	63.556
lib230524_TTCTCTCTCATCTACT-1	CTB	1	Aneuploid	98.788
lib230524_TTGACCCCAATAACGA-1	STB	0.714286	Aneuploid	80.1368
lib230524_TTGATGGCAACTGCCG-1	EVT	0.714286	Aneuploid	91.2204
lib230524_TTGCATTAGGAATGTT-1	STB	0.111717	Euploid	40.6259
lib230524_TTGCATTTCGTAACAC-1	CTB	0.174387	Euploid	109.187
lib230524_TTGCGTCGTCGTATTG-1	STB	0.262295	Euploid	100.35
lib230524_TTGCTGCAGCACTCCG-1	CTB	0.927536	Aneuploid	83.1154
lib230524_TTGGATGTCGAGAAGC-1	STB	0.41791	Euploid	95.4372
lib230524_TTGGGTAGTAGTACGG-1	STB	0.714286	Aneuploid	128.996
lib230524_TTGGTTTCAAGTCATC-1	EVT	0.41791	Euploid	100.919
lib230524_TTGTGGAAGCTAGCCC-1	STB	0.135081	Euploid	47.636
lib230524_TTGTGTTAGCATCAGG-1	STB	0.714286	Aneuploid	58.2152
lib230524_TTGTTCAAGCGGATCA-1	STB	1	Aneuploid	126.174
lib230524_TTGTTGTCATCGGAAG-1	CTB	1	Aneuploid	73.65
lib230524_TTGTTTGCATGTACGT-1	EVT	0.714286	Aneuploid	99.332
lib230524_TTGTTTGTCTGGGATT-1	CTB	0.714286	Aneuploid	71.6978
lib230524_TTTATGCCAATCGCGC-1	EVT	0.135081	Euploid	35.6784
lib230524_TTTCAGTAGTTGCTCA-1	STB	0.236842	Euploid	25.647
lib230524_TTTCCTCAGCGAACTG-1	CTB	0.394737	Euploid	163.871
lib230524_TTTCGATCACGTTGGC-1	STB	0.41791	Euploid	94.761
lib230524_TTTGACTAGGGCAACT-1	STB	1	Aneuploid	117.957
lib230524_TTTGATCAGTCTTCCC-1	CTB	1	Aneuploid	130.34
lib230524_TTTGATCTCGACGCTG-1	EVT	0.174387	Euploid	88.1547
lib230524_TTTGATCTCTCGCAGG-1	STB	1	Aneuploid	114.395
lib230524_TTTGGTTAGCTAATGA-1	STB	0.111717	Euploid	46.9248
lib230524_TTTGTTGGTAACATCC-1	CTB	0.174387	Euploid	119.67
lib230331_AAACCCACACTCCGAG-1	STB	1	Aneuploid	91.459
lib230331_AACCAACCACTTCTCG-1	CTB	0.160763	Euploid	58.6996
lib230331_AACCTTTTCGAGAAAT-1	STB	1	Aneuploid	71.2481
lib230331_AAGACAACAAGAGTGC-1	CTB	0.372032	Euploid	37.2991
lib230331_AAGACAATCCCATTTA-1	CTB	0.372032	Euploid	99.1782
lib230331_AAGCATCAGCTAAATG-1	STB	1	Aneuploid	95.857
lib230331_AAGCCATCACTGCGTG-1	CTB	0.160763	Euploid	65.54
lib230331_AAGTTCGAGCGAGGAG-1	CTB	0.372032	Euploid	99.6
lib230331_AATCACGGTACGATCT-1	STB	1	Aneuploid	90.5925
lib230331_AATGCCACACGCGCTA-1	STB	1	Aneuploid	96.423
lib230331_AATGCCACAGCTACTA-1	STB	0.333333	Euploid	101.622
lib230331_ACAAAGACATCGCCTT-1	CTB	0.263852	Euploid	131.263
lib230331_ACACAGTAGGAAGAAC-1	STB	1	Aneuploid	90.5027
lib230331_ACACGCGAGACCTTTG-1	STB	1	Aneuploid	32.7372
lib230331_ACAGGGACAAAGCTCT-1	STB	0.333333	Euploid	91.5574
lib230331_ACCATTTTCCAGTGCG-1	CTB	0.464912	Euploid	73.1839
lib230331_ACGATGTGTCCCACGA-1	STB	1	Aneuploid	122.376
lib230331_ACGGGTCCAATGTCAC-1	CTB	0.372032	Euploid	44.8859
lib230331_ACGGGTCCAGAACATA-1	STB	0.160763	Euploid	28.9846
lib230331_ACGTAGTCAACCCGCA-1	CTB	0.372032	Euploid	110.828
lib230331_ACGTAGTTCACGACTA-1	STB	1	Aneuploid	63.3472
lib230331_ACTATGGGTAAGACCG-1	STB	1	Aneuploid	107.342
lib230331_ACTCTCGAGGCTCTCG-1	STB	1	Aneuploid	90.9899
lib230331_ACTGCAAGTACGACAG-1	STB	1	Aneuploid	20.551
lib230331_ACTGTGAGTCTTGCTC-1	STB	1	Aneuploid	88.1826
lib230331_ACTTAGGTCAGCTGAT-1	STB	1	Aneuploid	76.4191
lib230331_ACTTCCGCACACGTGC-1	EVT	0.263852	Euploid	196.947
lib230331_ACTTTCAAGAGCATCG-1	EVT	0.263852	Euploid	104.651
lib230331_ACTTTCATCCTGTTGC-1	EPI	0.160763	Euploid	112.094
lib230331_AGAACCTAGTGCAAAT-1	STB	1	Aneuploid	106.616
lib230331_AGACACTAGTACGTCT-1	STB	1	Aneuploid	40.4863
lib230331_AGACCATGTGAGACCA-1	STB	1	Aneuploid	101.846
lib230331_AGACTCAAGGGATGTC-1	STB	1	Aneuploid	87.8889
lib230331_AGACTCACAGACTGCC-1	STB	1	Aneuploid	66.3927
lib230331_AGACTCAGTGAATTGA-1	CTB	0.160763	Euploid	90.2548
lib230331_AGCATCAGTTATGGTC-1	CTB	0.160763	Euploid	65.5489
lib230331_AGCCAGCTCTCTTCAA-1	CTB	0.160763	Euploid	84.9248
lib230331_AGCGCCACAATGACCT-1	CTB	0.160763	Euploid	47.2514
lib230331_AGCTACATCGCTCATC-1	CTB	0.372032	Euploid	67.5952
lib230331_AGCTACATCTTGAGCA-1	STB	0.160763	Euploid	54.2132
lib230331_AGCTCAAAGTGCAACG-1	CTB	0.160763	Euploid	49.0818
lib230331_AGCTTCCCAAATCCCA-1	CTB	0.160763	Euploid	71.7662
lib230331_AGCTTCCCATGCAGGA-1	STB	1	Aneuploid	83.9252
lib230331_AGGCTGCCAGTCGCAC-1	EVT	0.263852	Euploid	92.4709
lib230331_AGGCTGCGTATCGATC-1	STB	1	Aneuploid	81.7941
lib230331_AGGTCATAGTTGGAAT-1	CTB	0.464912	Euploid	135.026
lib230331_AGGTCATGTTGTGCAT-1	STB	1	Aneuploid	77.7528
lib230331_AGGTGTTAGATGCGAC-1	EVT	0.263852	Euploid	117.431
lib230331_AGTACCAGTCGGTACC-1	CTB	0.372032	Euploid	115.068
lib230331_AGTCAACAGCCTATCA-1	CTB	0.372032	Euploid	106.243
lib230331_AGTGACTCATCCGTTC-1	STB	1	Aneuploid	101.594
lib230331_AGTGTTGCACCAGTTA-1	STB	1	Aneuploid	40.4325
lib230331_ATACCTTCACGTCATA-1	EVT	0.464912	Euploid	69.4503
lib230331_ATACCTTCAGCTACTA-1	CTB	0.372032	Euploid	55.3455
lib230331_ATAGACCTCCTCCACA-1	EVT	0.263852	Euploid	214.042
lib230331_ATAGGCTTCCGCTTAC-1	CTB	0.372032	Euploid	65.4355
lib230331_ATATCCTAGAGCAACC-1	CTB	0.160763	Euploid	17.1199
lib230331_ATATCCTCAGAAGTGC-1	CTB	0.372032	Euploid	66.8389
lib230331_ATCCACCGTACTAACC-1	STB	0.160763	Euploid	101.478
lib230331_ATCCATTGTTGACTAC-1	EVT	1	Aneuploid	359.04
lib230331_ATCGCCTGTACAAACA-1	CTB	0.372032	Euploid	46.2723
lib230331_ATCGGATAGTGACCTT-1	CTB	0.372032	Euploid	91.0513
lib230331_ATCGTCCAGGGCAGAG-1	CTB	0.464912	Euploid	64.9746
lib230331_ATCGTGAAGTCTTGGT-1	STB	1	Aneuploid	66.7857
lib230331_ATCTCTATCAGCTTGA-1	CTB	0.160763	Euploid	58.1903
lib230331_ATGCCTCCACGTTCGG-1	STB	0.160763	Euploid	99.3927
lib230331_ATGCCTCCATCATCTT-1	CTB	0.372032	Euploid	82.6056
lib230331_ATGCCTCGTGATCATC-1	CTB	0.160763	Euploid	53.3559
lib230331_ATGGAGGCAAGTACCT-1	CTB	0.372032	Euploid	79.8527
lib230331_ATGTCTTTCGCCTAGG-1	CTB	0.160763	Euploid	85.0205
lib230331_ATTATCCGTATCCTTT-1	EVT	0.464912	Euploid	96.7438
lib230331_ATTCAGGTCCGGTAAT-1	STB	1	Aneuploid	50.9837
lib230331_ATTCATCCACAATCTG-1	STB	0.263852	Euploid	125.725
lib230331_ATTCCTACATCAGTCA-1	EVT	0.263852	Euploid	87.6501
lib230331_ATTCGTTAGCCGATCC-1	CTB	0.372032	Euploid	66.7562
lib230331_ATTCGTTAGGCAATGC-1	CTB	0.464912	Euploid	97.0153
lib230331_ATTGGGTGTTCGGTAT-1	EVT	0.263852	Euploid	97.293
lib230331_ATTTCACGTGCTGTCG-1	CTB	0.160763	Euploid	63.7822
lib230331_CAACAACCAGTCGTTA-1	STB	0.160763	Euploid	89.187
lib230331_CAACGATGTCAAGGCA-1	STB	1	Aneuploid	80.2015
lib230331_CAATACGGTAGACACG-1	STB	1	Aneuploid	78.1494
lib230331_CAATACGTCATCAGTG-1	CTB	0.464912	Euploid	86.3581
lib230331_CAATGACAGAAAGTCT-1	STB	1	Aneuploid	60.9919
lib230331_CACGGGTAGCAGGCTA-1	CTB	0.160763	Euploid	40.6807
lib230331_CACTAAGCAAGCCTGC-1	EVT	0.160763	Euploid	56.602
lib230331_CACTGAAGTACTCGCG-1	CTB	0.160763	Euploid	90.4686
lib230331_CACTGGGAGTGAATAC-1	EVT	0.464912	Euploid	47.1856
lib230331_CACTGTCCAAGTGTCT-1	STB	1	Aneuploid	75.4639
lib230331_CAGCAATCAAGTATAG-1	STB	1	Aneuploid	75.7319
lib230331_CAGCGTGAGGTCCCGT-1	EVT	0.263852	Euploid	107.467
lib230331_CAGCGTGGTGATTCAC-1	CTB	0.160763	Euploid	71.6672
lib230331_CAGCGTGTCGCGTAGC-1	STB	0.333333	Euploid	69.1545
lib230331_CAGGCCAGTCTGCATA-1	STB	1	Aneuploid	114.382
lib230331_CAGTTCCCAAAGGGTC-1	STB	1	Aneuploid	113.356
lib230331_CATAAGCCACAATTCG-1	STB	1	Aneuploid	117.343
lib230331_CATCCACAGTGTTCCA-1	CTB	0.160763	Euploid	67.8496
lib230331_CATCGTCAGTAAACAC-1	STB	1	Aneuploid	32.9692
lib230331_CATCGTCCAACCGCTG-1	CTB	0.372032	Euploid	115.292
lib230331_CATGGTATCTGAGATC-1	STB	1	Aneuploid	93.9799
lib230331_CATTCTAGTGCCAAGA-1	STB	0.333333	Euploid	104.281
lib230331_CATTTCAAGTACTCGT-1	STB	1	Aneuploid	95.1629
lib230331_CCACGAGAGCGTGCTC-1	EVT	0.263852	Euploid	85.3659
lib230331_CCACGAGAGTGTTCAC-1	STB	1	Aneuploid	72.3688
lib230331_CCACTTGAGAAACTAC-1	STB	1	Aneuploid	100.768
lib230331_CCACTTGTCGCTATTT-1	STB	1	Aneuploid	92.305
lib230331_CCCAACTCATCGAGCC-1	EVT	0.333333	Euploid	112.348
lib230331_CCCGGAACAAGGAGTC-1	STB	1	Aneuploid	78.8346
lib230331_CCCTAACAGTAACGAT-1	EVT	0.160763	Euploid	51.536
lib230331_CCCTAACGTCTTAGTG-1	EVT	0.263852	Euploid	113.247
lib230331_CCCTAACGTGATTAGA-1	STB	1	Aneuploid	91.3372
lib230331_CCCTAACTCTACACAG-1	CTB	0.464912	Euploid	132.609
lib230331_CCCTAACTCTATCCAT-1	CTB	0.160763	Euploid	90.7414
lib230331_CCCTCAAAGACAAGCC-1	CTB	0.372032	Euploid	73.7668
lib230331_CCCTGATAGTATCCTG-1	CTB	0.372032	Euploid	61.193
lib230331_CCGATCTTCATTTACC-1	STB	1	Aneuploid	88.9343
lib230331_CCGTTCATCGCTCCTA-1	STB	1	Aneuploid	77.3386
lib230331_CCTACGTTCACAGTGT-1	STB	1	Aneuploid	101.057
lib230331_CCTCAGTTCTTGCAAG-1	CTB	0.464912	Euploid	90.2802
lib230331_CCTCATGCAGACTGCC-1	EVT	0.263852	Euploid	82.9268
lib230331_CCTCCAAGTGAGATTA-1	STB	1	Aneuploid	83.4725
lib230331_CCTCTAGAGGAACGTC-1	STB	0.160763	Euploid	51.6913
lib230331_CCTCTCCTCACTCGAA-1	STB	1	Aneuploid	72.8897
lib230331_CCTTGTGCATGTGACT-1	CTB	0.372032	Euploid	69.3367
lib230331_CGAAGTTAGGGTACAC-1	STB	1	Aneuploid	78.6577
lib230331_CGACAGCCAGACCGCT-1	STB	1	Aneuploid	92.6861
lib230331_CGAGAAGAGAACTCCT-1	CTB	0.372032	Euploid	126.251
lib230331_CGAGGCTCATCCGATA-1	EVT	0.263852	Euploid	100.396
lib230331_CGAGTGCAGCTGACAG-1	CTB	0.372032	Euploid	86.3474
lib230331_CGATGCGAGGCGCTCT-1	EVT	0.333333	Euploid	62.5378
lib230331_CGCATAATCTAATTCC-1	STB	1	Aneuploid	99.5204
lib230331_CGCCAGAGTTACGCCG-1	EVT	0.263852	Euploid	100.279
lib230331_CGCCATTCACAGTACT-1	EPI	0.160763	Euploid	115.568
lib230331_CGGAACCCAAACCGGA-1	CTB	0.464912	Euploid	94.8743
lib230331_CGGACACTCTGCTAGA-1	EVT	0.263852	Euploid	211.237
lib230331_CGGGACTGTCTTGGTA-1	EVT	0.372032	Euploid	29.1335
lib230331_CGGGACTTCAACGAGG-1	CTB	0.464912	Euploid	110.107
lib230331_CGTCAAACAAATGCTC-1	CTB	0.372032	Euploid	79.2071
lib230331_CGTGATACAGGAGGTT-1	CTB	0.372032	Euploid	63.011
lib230331_CGTTAGATCAACTTTC-1	STB	0.333333	Euploid	94.7242
lib230331_CGTTCTGAGCTTTCTT-1	EVT	0.464912	Euploid	101.402
lib230331_CGTTGGGCACTAGGCC-1	EPI	0.160763	Euploid	91.0435
lib230331_CGTTGGGTCTGTCAGA-1	CTB	0.160763	Euploid	78.4196
lib230331_CTAACCCCACAGAAGC-1	EPI	0.160763	Euploid	116.759
lib230331_CTAACTTCATGTTTGG-1	EVT	0.263852	Euploid	168.645
lib230331_CTAAGTGCAAGTGCTT-1	STB	1	Aneuploid	87.232
lib230331_CTAAGTGTCGGCACTG-1	STB	0.333333	Euploid	136.173
lib230331_CTACTATGTGCGGTAA-1	STB	1	Aneuploid	68.2426
lib230331_CTCAACCGTTTGAAAG-1	CTB	0.372032	Euploid	46.1278
lib230331_CTCACTGCAACGGCTC-1	CTB	0.160763	Euploid	96.2417
lib230331_CTCAGGGCAGAGAAAG-1	STB	0.333333	Euploid	97.0624
lib230331_CTCCACACACACGTGC-1	CTB	0.464912	Euploid	119.068
lib230331_CTCCCTCAGCTTTCCC-1	CTB	0.160763	Euploid	37.6516
lib230331_CTCCTTTGTAACTAAG-1	CTB	1	Aneuploid	91.8137
lib230331_CTCTGGTCAAGGTCTT-1	CTB	0.464912	Euploid	136.826
lib230331_CTGCATCCATGTAACC-1	STB	1	Aneuploid	90.3465
lib230331_CTGCATCGTCCCTGTT-1	EPI	0.160763	Euploid	85.6709
lib230331_CTGGACGTCGGCGATC-1	STB	1	Aneuploid	38.3869
lib230331_CTGTAGACAGCGCTTG-1	EVT	1	Aneuploid	360.112
lib230331_CTTAGGAAGGGTTGCA-1	EVT	0.464912	Euploid	40.3418
lib230331_CTTCCGAGTGGATCGA-1	EVT	0.263852	Euploid	186.959
lib230331_CTTCGGTGTCTCAGAT-1	STB	1	Aneuploid	84.8202
lib230331_CTTCTCTTCAGACCTA-1	CTB	1	Aneuploid	81.6304
lib230331_GAACGTTAGAGCCATG-1	CTB	0.372032	Euploid	75.6279
lib230331_GAACGTTTCTTAGTTC-1	CTB	0.372032	Euploid	102.183
lib230331_GAAGGGTAGAGGCTGT-1	STB	1	Aneuploid	39.1846
lib230331_GAAGTAATCTTACCGC-1	CTB	1	Aneuploid	42.7994
lib230331_GACACGCCAGCACCCA-1	CTB	0.160763	Euploid	94.4881
lib230331_GACATCAAGTTTCGGT-1	EVT	1	Aneuploid	306.735
lib230331_GACCAATTCCGATTAG-1	CTB	0.372032	Euploid	64.9627
lib230331_GACCTTCCAGGTGACA-1	CTB	0.160763	Euploid	83.3984
lib230331_GACTCTCCATATACCG-1	STB	1	Aneuploid	90.2873
lib230331_GACTTCCAGACATATG-1	CTB	0.160763	Euploid	32.4268
lib230331_GACTTCCAGTGCAAAT-1	STB	0.333333	Euploid	83.8851
lib230331_GAGACTTCAGGATCTT-1	CTB	0.372032	Euploid	40.9448
lib230331_GAGAGGTTCCACTGGG-1	STB	1	Aneuploid	28.3652
lib230331_GAGATGGCATCCTTGC-1	EVT	0.263852	Euploid	92.5903
lib230331_GAGCTGCGTAAGTTAG-1	CTB	0.160763	Euploid	35.8353
lib230331_GAGGCCTAGCCTGAGA-1	STB	1	Aneuploid	100.496
lib230331_GAGGGATAGAAGTATC-1	STB	1	Aneuploid	78.0058
lib230331_GAGTCTATCCAGTACA-1	STB	1	Aneuploid	83.4867
lib230331_GATGATCTCATAGGCT-1	CTB	0.372032	Euploid	99.1472
lib230331_GATGTTGCACATACGT-1	STB	1	Aneuploid	61.7496
lib230331_GATTTCTGTACTAACC-1	CTB	0.160763	Euploid	62.203
lib230331_GCACATACAGCGACCT-1	STB	0.160763	Euploid	95.9678
lib230331_GCACATATCGCTTACC-1	CTB	0.372032	Euploid	75.4535
lib230331_GCAGGCTAGTAGGTTA-1	STB	1	Aneuploid	96.6406
lib230331_GCATCGGCACCTCTGT-1	STB	1	Aneuploid	41.5132
lib230331_GCCATGGAGCCTCCAG-1	CTB	0.464912	Euploid	72.7323
lib230331_GCCATGGCAAATTGGA-1	CTB	0.464912	Euploid	81.4162
lib230331_GCCATGGCATCATGAC-1	EVT	0.263852	Euploid	42.4434
lib230331_GCCATGGGTTTGGGTT-1	STB	0.160763	Euploid	70.0305
lib230331_GCCATTCTCCCTTGTG-1	CTB	0.160763	Euploid	50.5576
lib230331_GCCCAGAAGGCTCAAG-1	CTB	0.464912	Euploid	67.7391
lib230331_GCCCAGATCTCCAAGA-1	STB	0.333333	Euploid	85.6946
lib230331_GCCTGTTCAGTTGGTT-1	STB	1	Aneuploid	92.0898
lib230331_GCGATCGTCTACCTTA-1	STB	1	Aneuploid	68.9846
lib230331_GCGTGCAGTCCAGCCA-1	STB	1	Aneuploid	58.4971
lib230331_GCGTTTCAGAGTGTGC-1	STB	1	Aneuploid	110.83
lib230331_GCTACAAGTAATGTGA-1	EVT	0.263852	Euploid	205.324
lib230331_GCTACAATCGTTCTAT-1	STB	0.333333	Euploid	107.688
lib230331_GCTACCTTCGAATGCT-1	EVT	0.464912	Euploid	104.983
lib230331_GCTGAATGTACCTATG-1	CTB	0.464912	Euploid	94.6496
lib230331_GCTGGGTGTATCCTTT-1	EVT	0.464912	Euploid	43.8896
lib230331_GGATGTTGTAATCAAG-1	EVT	0.464912	Euploid	72.3219
lib230331_GGCGTCAAGAATTGTG-1	STB	1	Aneuploid	69.7405
lib230331_GGCTTGGCAGCGAGTA-1	CTB	0.372032	Euploid	109.708
lib230331_GGGACAACATTGCCTC-1	STB	0.160763	Euploid	81.8503
lib230331_GGGACAATCGTCCATC-1	CTB	0.372032	Euploid	75.0448
lib230331_GGGACCTGTTGCATGT-1	CTB	1	Aneuploid	44.6892
lib230331_GGGATGATCTATCACT-1	EVT	0.263852	Euploid	116.535
lib230331_GGGCCATGTATCCTCC-1	CTB	0.160763	Euploid	109.371
lib230331_GGGCCATTCGAACGCC-1	CTB	0.464912	Euploid	72.1176
lib230331_GGGTCACGTCCAAGAG-1	EVT	0.464912	Euploid	65.6859
lib230331_GGGTGTCTCCATTCAT-1	EVT	1	Aneuploid	381.967
lib230331_GGGTGTCTCGAGAACG-1	STB	1	Aneuploid	81.6957
lib230331_GGGTTATAGGTACAAT-1	CTB	0.372032	Euploid	60.0833
lib230331_GGTCTGGGTGAGCGAT-1	CTB	0.372032	Euploid	80.68
lib230331_GGTGTTACAACTAGAA-1	EVT	0.464912	Euploid	34.19
lib230331_GGTGTTAGTCAGGCAA-1	CTB	0.372032	Euploid	83.0785
lib230331_GTAACACAGGGAACAA-1	CTB	0.464912	Euploid	107.217
lib230331_GTAAGTCCAGAGAAAG-1	EVT	0.464912	Euploid	123.719
lib230331_GTAAGTCGTCAACGCC-1	STB	1	Aneuploid	76.5471
lib230331_GTAATCGAGTTGCCCG-1	STB	0.333333	Euploid	44.1809
lib230331_GTAATGCTCGCTAGCG-1	CTB	0.372032	Euploid	118.048
lib230331_GTAGAGGCACCCTTGT-1	CTB	0.160763	Euploid	68.2542
lib230331_GTAGATCGTCTCACGG-1	EVT	0.263852	Euploid	115.276
lib230331_GTAGATCGTTAAGACA-1	STB	1	Aneuploid	57.3137
lib230331_GTAGATCGTTTCAGAC-1	CTB	0.372032	Euploid	116.636
lib230331_GTAGGTTCACCTTCGT-1	CTB	0.464912	Euploid	105.818
lib230331_GTAGTACTCGAAGAAT-1	STB	1	Aneuploid	107.843
lib230331_GTCAGCGTCGCTTTAT-1	CTB	0.160763	Euploid	76.5714
lib230331_GTCATCCGTCGCGTCA-1	EVT	0.263852	Euploid	154.871
lib230331_GTCCTCACAGGTCTCG-1	EVT	0.333333	Euploid	108.016
lib230331_GTCGCGACAGGCGTTC-1	CTB	0.160763	Euploid	34.8973
lib230331_GTCTACCCAACGCCCA-1	CTB	0.160763	Euploid	15.711
lib230331_GTCTACCTCCTAGAGT-1	EVT	0.160763	Euploid	82.6476
lib230331_GTCTAGATCCCTCTCC-1	STB	0.160763	Euploid	82.5238
lib230331_GTGAGCCGTCATACCA-1	STB	0.333333	Euploid	89.645
lib230331_GTGCACGAGTTCGCAT-1	STB	1	Aneuploid	67.3834
lib230331_GTGCTGGTCGTCACCT-1	CTB	0.372032	Euploid	87.9157
lib230331_GTGGCGTGTCTAACGT-1	CTB	0.372032	Euploid	65.8712
lib230331_GTGTGGCCAAGTGGTG-1	CTB	0.372032	Euploid	82.3329
lib230331_GTGTTCCTCTGCTTTA-1	STB	1	Aneuploid	36.3888
lib230331_GTTACCCAGACACACG-1	EVT	0.263852	Euploid	110.274
lib230331_GTTACCCAGGGCAATC-1	EVT	0.160763	Euploid	75.7183
lib230331_GTTACCCGTCAAACGG-1	CTB	0.160763	Euploid	72.9111
lib230331_GTTCCGTAGGGTGAAA-1	EVT	0.263852	Euploid	29.2364
lib230331_GTTCCGTTCGTAGGGA-1	STB	1	Aneuploid	95.65
lib230331_GTTCGCTGTAACGCGA-1	EVT	0.263852	Euploid	65.0377
lib230331_GTTCTATAGCGGTAGT-1	EVT	1	Aneuploid	340.541
lib230331_GTTGAACAGGGCTTCC-1	EVT	0.263852	Euploid	94.1344
lib230331_GTTGAACGTTAGGCTT-1	STB	1	Aneuploid	84.788
lib230331_GTTGCGGTCTGTCCGT-1	STB	1	Aneuploid	71.9677
lib230331_GTTGTAGGTGGCATCC-1	CTB	0.464912	Euploid	100.492
lib230331_GTTGTCCCAAACACGG-1	EVT	1	Aneuploid	339.552
lib230331_GTTGTCCGTCGTTGCG-1	STB	1	Aneuploid	30.4002
lib230331_TAACGACTCAGTCATG-1	STB	1	Aneuploid	52.6962
lib230331_TAACGACTCTCCACTG-1	STB	1	Aneuploid	88.21
lib230331_TAAGCCAAGAATTGTG-1	STB	1	Aneuploid	79.2188
lib230331_TACCCACAGTGGATAT-1	CTB	0.372032	Euploid	70.9631
lib230331_TACCGAATCATAGACC-1	STB	1	Aneuploid	50.8525
lib230331_TACCGAATCTTGGAAC-1	STB	1	Aneuploid	98.3875
lib230331_TACCGGGCATACTGTG-1	CTB	0.464912	Euploid	84.8906
lib230331_TACCTCGTCTTACTGT-1	EVT	0.263852	Euploid	36.2035
lib230331_TACTGCCGTAGTAAGT-1	STB	1	Aneuploid	93.8882
lib230331_TACTTACCACTGAATC-1	CTB	0.160763	Euploid	54.2896
lib230331_TAGGGTTAGTAACGTA-1	STB	1	Aneuploid	93.9008
lib230331_TAGTGCACATAGGTTC-1	STB	1	Aneuploid	42.6482
lib230331_TATACCTTCAGTGTTG-1	STB	0.333333	Euploid	100.885
lib230331_TATCCTAGTGTAAACA-1	CTB	1	Aneuploid	56.0158
lib230331_TATTCCATCTTTACAC-1	CTB	0.160763	Euploid	40.4012
lib230331_TCAAGCACAGTTGAAA-1	STB	1	Aneuploid	44.867
lib230331_TCAATTCTCTCATGCC-1	CTB	0.160763	Euploid	25.8102
lib230331_TCACAAGCACATAGCT-1	EVT	0.160763	Euploid	65.1432
lib230331_TCACACCTCGGCATAT-1	CTB	0.160763	Euploid	66.4495
lib230331_TCACACCTCTCAGTCC-1	CTB	0.160763	Euploid	92.5854
lib230331_TCACATTTCACCCTGT-1	CTB	0.372032	Euploid	72.8896
lib230331_TCACGCTCATCGCTGG-1	STB	0.160763	Euploid	98.5488
lib230331_TCAGTCCCAGTCAGCC-1	STB	1	Aneuploid	59.809
lib230331_TCAGTGACACATAACC-1	CTB	0.160763	Euploid	60.8791
lib230331_TCAGTGATCTGGACCG-1	CTB	0.372032	Euploid	49.1061
lib230331_TCAGTTTTCACTTCTA-1	STB	1	Aneuploid	117.798
lib230331_TCATCATGTGCCTTTC-1	STB	1	Aneuploid	81.2949
lib230331_TCATCCGGTTCAAAGA-1	CTB	0.160763	Euploid	75.9388
lib230331_TCATGCCGTATCACCA-1	STB	1	Aneuploid	69.3995
lib230331_TCATGCCGTTTCTATC-1	STB	1	Aneuploid	111.62
lib230331_TCATTCAAGGTCGCCT-1	CTB	0.160763	Euploid	58.6483
lib230331_TCATTGTAGCAGCCCT-1	STB	1	Aneuploid	62.2383
lib230331_TCATTGTTCCTCTAAT-1	STB	1	Aneuploid	42.2757
lib230331_TCCAGAACATAGGTAA-1	EVT	0.160763	Euploid	107.208
lib230331_TCCATCGCATGTGGTT-1	EPI	0.160763	Euploid	96.0097
lib230331_TCCCACAAGCGACTAG-1	STB	0.160763	Euploid	43.3142
lib230331_TCCGATCGTTGTAAAG-1	CTB	0.372032	Euploid	90.5788
lib230331_TCCGATCGTTGTCAGT-1	EVT	0.464912	Euploid	75.9811
lib230331_TCCTCGACAGACGCTC-1	STB	1	Aneuploid	120.003
lib230331_TCCTCTTCATACAGGG-1	CTB	0.372032	Euploid	40.0526
lib230331_TCCTCTTGTAGTTCCA-1	EVT	0.160763	Euploid	34.7937
lib230331_TCCTTCTTCACGTCCT-1	EVT	0.263852	Euploid	152.231
lib230331_TCGAACATCCCATTTA-1	EPI	0.160763	Euploid	38.2333
lib230331_TCGCACTCATACACCA-1	EVT	0.263852	Euploid	102.75
lib230331_TCGGATATCACCTCTG-1	CTB	0.160763	Euploid	68.3533
lib230331_TCTACCGCAATTTCGG-1	CTB	0.372032	Euploid	92.2974
lib230331_TCTACCGCAGCTGTGC-1	STB	1	Aneuploid	81.3494
lib230331_TCTATCAAGAACAAGG-1	EVT	0.263852	Euploid	105.313
lib230331_TCTCAGCCAATGGCCC-1	EPI	0.160763	Euploid	112.071
lib230331_TCTCTGGAGAGTAACT-1	CTB	0.372032	Euploid	105.982
lib230331_TCTGCCAAGCGGGTAT-1	EPI	0.160763	Euploid	88.6181
lib230331_TCTGGCTAGCCACCGT-1	EVT	0.333333	Euploid	105.179
lib230331_TCTGTCGAGGACAACC-1	STB	0.333333	Euploid	86.3986
lib230331_TCTGTCGAGGCCTTCG-1	STB	1	Aneuploid	79.4428
lib230331_TCTTGCGGTCTACGTA-1	EVT	0.263852	Euploid	84.3738
lib230331_TCTTTGACAGCTTTCC-1	STB	1	Aneuploid	127.275
lib230331_TCTTTGAGTCATCAGT-1	CTB	0.160763	Euploid	24.1688
lib230331_TCTTTGATCGAGAATA-1	CTB	0.464912	Euploid	49.0178
lib230331_TGAACGTAGAGCCGAT-1	CTB	0.372032	Euploid	90.0455
lib230331_TGAATCGCAGTAGATA-1	CTB	0.464912	Euploid	67.2442
lib230331_TGAATGCGTTCGCGTG-1	CTB	0.372032	Euploid	70.272
lib230331_TGATGCAGTAACAGGC-1	STB	1	Aneuploid	74.6751
lib230331_TGATGGTCACCACATA-1	STB	1	Aneuploid	53.8012
lib230331_TGATGGTTCGCATAGT-1	CTB	0.160763	Euploid	67.7425
lib230331_TGATGGTTCTTGGAAC-1	STB	1	Aneuploid	52.6176
lib230331_TGATTTCGTTGTGCAT-1	EVT	0.464912	Euploid	69.3081
lib230331_TGATTTCGTTTATGCG-1	CTB	0.372032	Euploid	68.1224
lib230331_TGCACGGAGGGAGGGT-1	CTB	0.333333	Euploid	55.6584
lib230331_TGCACGGCACGCAAAG-1	EPI	0.160763	Euploid	110.27
lib230331_TGCAGTACATCCTATT-1	EPI	1	Aneuploid	103.378
lib230331_TGCATCCCAAGATCCT-1	STB	0.333333	Euploid	136.302
lib230331_TGCATCCGTTCTTGCC-1	CTB	0.160763	Euploid	67.2008
lib230331_TGCATGACAGATCACT-1	STB	1	Aneuploid	52.2007
lib230331_TGCGACGTCCAGTACA-1	STB	1	Aneuploid	96.628
lib230331_TGCGGCACAAAGCAAT-1	CTB	0.372032	Euploid	96.3225
lib230331_TGCTCGTCATCCGAAT-1	EVT	0.464912	Euploid	57.7339
lib230331_TGGAGAGCAATGAACA-1	STB	1	Aneuploid	50.2085
lib230331_TGGAGAGCAGCACACC-1	STB	1	Aneuploid	31.6011
lib230331_TGGAGGAAGCATACTC-1	EVT	0.333333	Euploid	77.9822
lib230331_TGGAGGAGTACTCCCT-1	STB	1	Aneuploid	71.9891
lib230331_TGGATCACAGAGAATT-1	CTB	0.372032	Euploid	67.8395
lib230331_TGGATCAGTCGACTTA-1	STB	1	Aneuploid	78.059
lib230331_TGGATGTTCCGACATA-1	STB	1	Aneuploid	99.9706
lib230331_TGGGCTGTCTAGTGAC-1	CTB	0.372032	Euploid	112.539
lib230331_TGGTACACAGGTCCCA-1	CTB	1	Aneuploid	116.522
lib230331_TGGTACAGTGGCTGAA-1	CTB	0.160763	Euploid	40.774
lib230331_TGGTGATAGACATCAA-1	CTB	0.160763	Euploid	99.0214
lib230331_TGTAACGTCTTAATCC-1	CTB	0.160763	Euploid	81.9366
lib230331_TGTCCCAGTCCAGCGT-1	CTB	0.464912	Euploid	102.649
lib230331_TGTGAGTAGTACTCGT-1	EPI	0.160763	Euploid	104.652
lib230331_TGTGATGCAATTGCGT-1	STB	0.333333	Euploid	117.887
lib230331_TGTGGCGCAAATGGTA-1	EVT	0.263852	Euploid	67.5317
lib230331_TGTTGGAAGTGGTTCT-1	CTB	0.160763	Euploid	78.0969
lib230331_TGTTGGACAGGAAGTC-1	STB	1	Aneuploid	67.2482
lib230331_TTACAGGCAAACTGCT-1	STB	1	Aneuploid	69.9353
lib230331_TTACGTTCAGCGTGCT-1	EVT	0.263852	Euploid	110.88
lib230331_TTCACGCGTGGCTACC-1	EVT	0.464912	Euploid	54.4175
lib230331_TTCATTGAGACTCATC-1	STB	0.333333	Euploid	70.4355
lib230331_TTCATTGGTTTCACAG-1	EVT	0.464912	Euploid	65.0051
lib230331_TTCCAATGTATGGAAT-1	CTB	0.372032	Euploid	53.8468
lib230331_TTCCAATTCCCGGTAG-1	CTB	0.160763	Euploid	64.4447
lib230331_TTCCAATTCCGAAGGA-1	EPI	0.160763	Euploid	79.9431
lib230331_TTCTAGTAGAGATTCA-1	EVT	0.263852	Euploid	48.0474
lib230331_TTCTAGTCACCCTTAC-1	STB	1	Aneuploid	67.364
lib230331_TTCTCTCTCCGCATAA-1	EVT	0.263852	Euploid	84.8284
lib230331_TTGATGGAGAGCATCG-1	CTB	0.464912	Euploid	90.8427
lib230331_TTGCATTGTAAGCAAT-1	CTB	0.464912	Euploid	143.475
lib230331_TTGTTGTAGAATCGCG-1	CTB	0.372032	Euploid	110.834
lib230331_TTGTTGTCACCTGCAG-1	CTB	0.464912	Euploid	70.5158
lib230331_TTGTTGTGTTGTCTAG-1	STB	1	Aneuploid	74.0673
lib230331_TTTACCAGTTCTCGCT-1	EVT	0.160763	Euploid	38.9903
lib230331_TTTACTGAGCCGTCGT-1	CTB	0.263852	Euploid	104.937
lib230331_TTTACTGTCATACGGT-1	CTB	0.160763	Euploid	64.0378
lib230331_TTTATGCAGGCCACCT-1	CTB	0.372032	Euploid	80.9301
lib230331_TTTATGCCAACATACC-1	EVT	0.464912	Euploid	88.3797
lib230331_TTTATGCTCCTACGGG-1	EVT	0.160763	Euploid	90.5416
lib230331_TTTCAGTCAGAGTGTG-1	CTB	0.160763	Euploid	76.4652
lib230331_TTTCATGTCCGCACTT-1	EPI	0.160763	Euploid	68.1819
lib230331_TTTCGATAGTCATAGA-1	STB	1	Aneuploid	31.0658
lib230331_TTTGTTGAGCTGCCAC-1	EVT	0.464912	Euploid	61.6454
lib230331_AAACGCTGTCACAATC-1	CTB	1	Aneuploid	75.7231
lib230331_AACCATGTCTTAGTTC-1	CTB	1	Aneuploid	58.0659
lib230331_AACGTCAGTACGAGTG-1	STB	1	Aneuploid	51.3049
lib230331_ACAACCACACGTACTA-1	CTB	1	Aneuploid	37.3928
lib230331_AGATCCAAGTTCTCTT-1	CTB	1	Aneuploid	103.591
lib230331_AGATCGTCATTGTACG-1	EVT	0.757143	Aneuploid	124.695
lib230331_AGGTGTTAGCTACTAC-1	CTB	1	Aneuploid	51.4468
lib230331_AGTGATCAGGTCGACA-1	CTB	1	Aneuploid	82.0892
lib230331_ATATCCTTCCGTGTAA-1	CTB	1	Aneuploid	60.4552
lib230331_ATCCACCTCCATTGGA-1	EVT	1	Aneuploid	123.654
lib230331_ATCCCTGCATTGAAAG-1	CTB	1	Aneuploid	89.8092
lib230331_ATCTTCAAGCACACAG-1	CTB	1	Aneuploid	64.6543
lib230331_ATTGGGTAGTCAGGGT-1	CTB	1	Aneuploid	81.142
lib230331_ATTTACCCATACAGAA-1	CTB	1	Aneuploid	82.1056
lib230331_ATTTCTGGTGGCCTCA-1	CTB	1	Aneuploid	93.7546
lib230331_CACCGTTTCGAGCCTG-1	EVT	0.757143	Aneuploid	89.6033
lib230331_CACTGTCAGGAGAATG-1	CTB	1	Aneuploid	119.698
lib230331_CAGGGCTTCAGTGCGC-1	STB	1	Aneuploid	78.512
lib230331_CATCCCATCCGATAAC-1	EVT	0.757143	Aneuploid	92.1015
lib230331_CATGGATTCCCATTCG-1	CTB	1	Aneuploid	78.4877
lib230331_CCAATGAAGTAAACTG-1	EVT	0.757143	Aneuploid	105.449
lib230331_CCAATTTTCGGACCAC-1	CTB	1	Aneuploid	79.9694
lib230331_CCATAAGAGACTTGTC-1	CTB	1	Aneuploid	101.1
lib230331_CCGATGGGTACACGCC-1	EVT	1	Aneuploid	86.7687
lib230331_CCGGTGATCACCTGGG-1	CTB	1	Aneuploid	87.7471
lib230331_CCTAACCCACGCACCA-1	CTB	1	Aneuploid	85.7985
lib230331_CCTCCTCCACTACGGC-1	CTB	1	Aneuploid	116.925
lib230331_CGAGGCTCAGTGGCTC-1	CTB	1	Aneuploid	77.3634
lib230331_CGAGTGCTCACTGCTC-1	EVT	1	Aneuploid	94.6311
lib230331_CGAGTTACACATCATG-1	CTB	1	Aneuploid	82.6701
lib230331_CGGAATTTCGCTGACG-1	EVT	0.757143	Aneuploid	181.636
lib230331_CGTTGGGTCAACCGAT-1	CTB	1	Aneuploid	61.592
lib230331_CTACATTAGACCAGAC-1	EVT	1	Aneuploid	79.7048
lib230331_CTACATTTCGACCCAG-1	CTB	1	Aneuploid	69.5112
lib230331_CTACATTTCTTGCAAG-1	CTB	1	Aneuploid	91.4737
lib230331_CTACCTGTCTGGGATT-1	CTB	1	Aneuploid	114.157
lib230331_CTAGACAAGCGCTTCG-1	CTB	1	Aneuploid	73.7585
lib230331_CTCAAGAGTAATGATG-1	EVT	0.757143	Aneuploid	67.5051
lib230331_CTGCTCACAGCTTCGG-1	CTB	1	Aneuploid	135.452
lib230331_CTGTACCGTTACCGTA-1	STB	1	Aneuploid	35.0335
lib230331_CTTCAATGTCCACAGC-1	CTB	1	Aneuploid	130.979
lib230331_CTTTCGGTCTCATGCC-1	CTB	1	Aneuploid	93.013
lib230331_GAACACTCAACGTATC-1	CTB	1	Aneuploid	77.533
lib230331_GACTCAAGTACCATAC-1	CTB	1	Aneuploid	76.0547
lib230331_GAGGCAACAGCTAACT-1	EVT	1	Aneuploid	91.9835
lib230331_GAGGGATCAACTCCAA-1	CTB	1	Aneuploid	87.151
lib230331_GATTCGACAGCAGACA-1	STB	1	Aneuploid	30.915
lib230331_GATTTCTAGACTCTTG-1	CTB	1	Aneuploid	66.0631
lib230331_GCAACATCAATCGCAT-1	CTB	1	Aneuploid	115.409
lib230331_GCACATAAGGAAGTAG-1	CTB	1	Aneuploid	59.8332
lib230331_GCCAACGTCGTGACTA-1	EVT	0.757143	Aneuploid	93.9549
lib230331_GCCTGTTGTAGATGTA-1	CTB	1	Aneuploid	83.9201
lib230331_GCGATCGAGGACAAGA-1	CTB	1	Aneuploid	103.561
lib230331_GCTCAAAAGCACACAG-1	EVT	1	Aneuploid	88.1857
lib230331_GGAGGATAGACTACGG-1	STB	1	Aneuploid	38.6969
lib230331_GGGTTATGTTCCGGTG-1	EVT	1	Aneuploid	93.5915
lib230331_GGTGATTAGAAGCTGC-1	CTB	1	Aneuploid	98.5293
lib230331_GTAACCAAGATGCTGG-1	CTB	1	Aneuploid	104.343
lib230331_GTCCTCAAGGAAAGGT-1	CTB	1	Aneuploid	98.4191
lib230331_GTGGAGAGTTGTGGCC-1	CTB	1	Aneuploid	86.9843
lib230331_GTGTAACTCACTCTTA-1	CTB	1	Aneuploid	120.848
lib230331_TAACCAGCATGTAACC-1	CTB	1	Aneuploid	106.218
lib230331_TAACGACAGGATACCG-1	CTB	1	Aneuploid	93.613
lib230331_TAAGCCAGTTTACCTT-1	EVT	1	Aneuploid	59.5801
lib230331_TACCGGGAGTCATAGA-1	CTB	1	Aneuploid	63.5572
lib230331_TACCGGGAGTCATGGA-1	CTB	1	Aneuploid	179.531
lib230331_TCAATTCCAATCCTTT-1	EVT	1	Aneuploid	86.3905
lib230331_TCACGGGTCCGAAGGA-1	CTB	1	Aneuploid	94.1322
lib230331_TCAGCCTAGTTATGGA-1	CTB	1	Aneuploid	67.258
lib230331_TCCTTCTTCCATACTT-1	EVT	1	Aneuploid	86.6737
lib230331_TCCTTTCAGTCGCCAC-1	CTB	1	Aneuploid	58.5176
lib230331_TCGATTTTCATGCCGG-1	CTB	1	Aneuploid	125.36
lib230331_TCGGGACAGACCATAA-1	CTB	1	Aneuploid	89.7699
lib230331_TCTACATCATCCGAGC-1	CTB	1	Aneuploid	76.0845
lib230331_TCTCTGGTCCAACTGA-1	EVT	0.757143	Aneuploid	132.017
lib230331_TCTCTGGTCTTTGCGC-1	CTB	1	Aneuploid	118.812
lib230331_TCTGCCAAGCGTCAAG-1	EVT	0.757143	Aneuploid	90.9271
lib230331_TGAGCATCATGTTCAG-1	CTB	1	Aneuploid	69.147
lib230331_TGCGGCACAGCAGGAT-1	CTB	1	Aneuploid	130.066
lib230331_TGCTCGTCATCCGATA-1	CTB	1	Aneuploid	128.21
lib230331_TGCTTGCCACGATTCA-1	CTB	1	Aneuploid	61.8609
lib230331_TGGGAGACAGATAAAC-1	EVT	1	Aneuploid	122.788
lib230331_TGGGTTAGTGCCGTAC-1	CTB	1	Aneuploid	118.554
lib230331_TTAATCCTCGCTCTCA-1	CTB	1	Aneuploid	45.6911
lib230331_TTAATCCTCTACAGGT-1	CTB	1	Aneuploid	87.8771
lib230331_TTACGCCCACGTGTGC-1	CTB	1	Aneuploid	102.3
lib230331_TTCATGTTCCTGGGTG-1	CTB	1	Aneuploid	77.6242
lib230331_TTCATTGTCCTTATGT-1	EVT	1	Aneuploid	70.7578
lib230331_TTCTAGTTCACTGAAC-1	CTB	1	Aneuploid	87.0019
lib230331_TTGGGCGTCCCGATCT-1	EVT	0.757143	Aneuploid	91.6849
lib230331_TTTACGTTCTGAACGT-1	CTB	1	Aneuploid	87.6934
lib230331_AAACCCATCTCCCAAC-1	STB	0.0285326	Euploid	225.333
lib230331_AACCACATCAGGACAG-1	CTB	0	Euploid	40.7015
lib230331_AACGGGATCTAAGAAG-1	HYPO	0.0285326	Euploid	30.4471
lib230331_AATGGCTGTTTGAACC-1	EVT	0.0285326	Euploid	76.891
lib230331_ACACAGTCAGGCCCTA-1	EPI	0	Euploid	46.8943
lib230331_ACCCTCATCCGACGGT-1	STB	0.0285326	Euploid	278.781
lib230331_ACCCTCATCTTGGTGA-1	EVT	0.0285326	Euploid	40.0481
lib230331_ACTTCCGCATAATGAG-1	STB	0.0285326	Euploid	111.217
lib230331_AGACACTGTACTAGCT-1	CTB	0.0285326	Euploid	87.8016
lib230331_AGAGCCCAGAAGCGCT-1	STB	0.0285326	Euploid	35.7223
lib230331_AGGGCTCGTAGCGTAG-1	CTB	0.0285326	Euploid	57.7521
lib230331_AGGGTTTAGAAGCTCG-1	STB	0.0285326	Euploid	24.3291
lib230331_AGTCATGTCTGTCGTC-1	EVT	0.0285326	Euploid	129.232
lib230331_ATACTTCAGAAGGGAT-1	CTB	0.0285326	Euploid	62.3458
lib230331_ATCATTCCAAGAAACT-1	CTB	0.0285326	Euploid	75.2772
lib230331_ATGGAGGTCGGAGATG-1	STB	0.0285326	Euploid	103.004
lib230331_ATGGTTGTCACGAGGA-1	EVT	0.0285326	Euploid	77.9447
lib230331_CAGGCCAAGCGTGAAC-1	STB	0.0285326	Euploid	20.2792
lib230331_CATTTCAGTCGTCATA-1	EVT	0.0285326	Euploid	367.385
lib230331_CCGATGGGTGTCTCCT-1	STB	0.0285326	Euploid	250.718
lib230331_CCGGTAGTCCGGCTTT-1	EVT	0.0285326	Euploid	231.656
lib230331_CCGTGAGCACTTGGCG-1	EVT	0.0285326	Euploid	133.092
lib230331_CGAGGAATCGACGCTG-1	CTB	0.0285326	Euploid	45.4261
lib230331_CGGGTGTTCCCGAGAC-1	CTB	0.0285326	Euploid	37.7066
lib230331_CTACATTTCAAAGACA-1	STB	0.0285326	Euploid	31.7901
lib230331_CTCCAACGTTCGGACC-1	EVT	0.0285326	Euploid	16.618
lib230331_CTCGAGGCACCAAAGG-1	CTB	0.0285326	Euploid	109.702
lib230331_CTGTGAACACTGAGTT-1	EPI	0	Euploid	128.137
lib230331_CTTCTAAGTGCATACT-1	EVT	0.0285326	Euploid	106.334
lib230331_CTTTCGGTCGCGTGAC-1	HYPO	0.0285326	Euploid	27.1694
lib230331_GACCAATCACTTGGGC-1	EPI	0.0285326	Euploid	182.548
lib230331_GAGAAATGTCTGTGAT-1	CTB	0.0285326	Euploid	26.6636
lib230331_GATCCCTGTGTGTCCG-1	CTB	0.0285326	Euploid	63.7845
lib230331_GATGCTATCATGAGGG-1	EPI	0.0285326	Euploid	349.506
lib230331_GCAGCCATCTCCAATT-1	STB	0.0285326	Euploid	120.553
lib230331_GCATCTCAGGGATGTC-1	CTB	0.0285326	Euploid	106.997
lib230331_GGAACCCAGTACCCTA-1	STB	0.0285326	Euploid	30.3619
lib230331_GGAATCTCAATCGTCA-1	CTB	0.0285326	Euploid	39.876
lib230331_GGCGTCAGTTCCGCGA-1	STB	0.0285326	Euploid	101.392
lib230331_GGTCTGGCAGTCGCTG-1	CTB	0.0285326	Euploid	25.7279
lib230331_GTCCACTCACTTTAGG-1	EVT	0.0285326	Euploid	155.123
lib230331_GTGAGCCCAATAGTAG-1	CTB	0.0285326	Euploid	13.5429
lib230331_GTTGCTCGTACGCTTA-1	STB	0.0285326	Euploid	100.308
lib230331_TAACACGCATCGCTAA-1	CTB	0.0285326	Euploid	52.7129
lib230331_TACAACGTCTGAGGTT-1	CTB	0.0285326	Euploid	46.9868
lib230331_TACACCCAGATTGATG-1	STB	0.0285326	Euploid	80.1057
lib230331_TACGGTAAGGCGCTCT-1	EVT	0.0285326	Euploid	225.896
lib230331_TACTTACGTAGCGTTT-1	CTB	0.0285326	Euploid	63.5017
lib230331_TCACGCTAGGTTGACG-1	STB	0.0285326	Euploid	103.822
lib230331_TCATACTGTTTACGAC-1	STB	0.0285326	Euploid	87.8998
lib230331_TCATATCTCTCCCAAC-1	STB	0.0285326	Euploid	98.7864
lib230331_TCGACGGCATAGTCGT-1	CTB	0.0285326	Euploid	83.0946
lib230331_TCTAACTCAGTCACGC-1	EPI	0.0285326	Euploid	150.545
lib230331_TGAACGTAGGTTGAGC-1	EVT	0.0285326	Euploid	85.4861
lib230331_TGGGAGATCGTGTCAA-1	EPI	0.0285326	Euploid	136.169
lib230331_TGGGCTGAGCACTAGG-1	CTB	0.0285326	Euploid	35.292
lib230331_TGGGCTGCACTGGCCA-1	EVT	0.0285326	Euploid	495.429
lib230331_TGTGAGTCAGGAATCG-1	CTB	0.0285326	Euploid	38.9631
lib230331_TGTTCATGTTCCGTTC-1	EVT	0.0285326	Euploid	292.47
lib230331_TTATTGCAGACGCCCT-1	CTB	0.0285326	Euploid	44.4949
lib230331_TTCCAATCAAGATGTA-1	STB	0.0285326	Euploid	125.209
lib230331_AAAGTGACATGGGAAC-1	CTB	0.542857	Euploid	133.843
lib230331_AACAACCGTAATTGGA-1	CTB	0.542857	Euploid	82.5638
lib230331_AACACACCAGCTACCG-1	STB	0.3382	Euploid	202.747
lib230331_AACGAAAGTGGGCTCT-1	CTB	0.542857	Euploid	103.962
lib230331_AAGACTCAGGTTCTCG-1	EVT	0.542857	Euploid	200.494
lib230331_AAGACTCAGGTTCTTG-1	EVT	0.542857	Euploid	80.1672
lib230331_AAGATAGAGACTCTTG-1	CTB	0.585714	Euploid	55.0887
lib230331_AAGTTCGCAGCAGTAG-1	STB	0.3382	Euploid	223.989
lib230331_AATGAAGAGTCCCAAT-1	EVT	0.3382	Euploid	47.9492
lib230331_ACAAGCTCAGGTGGAT-1	CTB	0.585714	Euploid	64.2681
lib230331_ACACCAATCGGTGTTA-1	CTB	0.282353	Euploid	65.4886
lib230331_ACAGGGAGTGCGACAA-1	STB	0.282353	Euploid	82.4118
lib230331_ACATCCCAGGCTATCT-1	CTB	0.542857	Euploid	116.145
lib230331_ACATCCCAGTTGGACG-1	STB	0.282353	Euploid	95.657
lib230331_ACATGCAAGACGACGT-1	CTB	0.585714	Euploid	134.421
lib230331_ACCATTTTCCGTGGTG-1	CTB	0.282353	Euploid	84.2483
lib230331_ACCCTTGCAGAGTCAG-1	CTB	0.585714	Euploid	111.725
lib230331_ACCTACCGTTCGTACA-1	EVT	0.3382	Euploid	47.9268
lib230331_ACCTACCTCATGCCGG-1	CTB	0.542857	Euploid	88.9018
lib230331_ACGCACGCAAACGGCA-1	STB	0.282353	Euploid	81.2655
lib230331_ACGGTTAAGGTAAAGG-1	EVT	0.3382	Euploid	78.6383
lib230331_ACGTAACGTGACACAG-1	EVT	0.3382	Euploid	111.801
lib230331_ACGTTCCGTTACGGAG-1	CTB	0.542857	Euploid	70.0763
lib230331_ACTGATGGTCACTTAG-1	STB	0.3382	Euploid	223.533
lib230331_ACTGCAAGTGGCCACT-1	CTB	0.542857	Euploid	69.7129
lib230331_ACTGTGAGTTTCTTAC-1	CTB	0.542857	Euploid	128.171
lib230331_ACTTCCGCAAAGGCTG-1	EVT	0.3382	Euploid	247.403
lib230331_ACTTCGCGTAATCAAG-1	EVT	0.3382	Euploid	149.353
lib230331_AGAACAACATTATGCG-1	CTB	0.542857	Euploid	87.7328
lib230331_AGACCATCAGACGATG-1	CTB	0.585714	Euploid	159.583
lib230331_AGACTCAGTAGTGTGG-1	CTB	0.542857	Euploid	72.6679
lib230331_AGAGAGCCACCCTAGG-1	CTB	0.542857	Euploid	86.4953
lib230331_AGATCCAGTAATGTGA-1	EVT	0.282353	Euploid	47.1914
lib230331_AGATCGTAGTACAACA-1	CTB	0.542857	Euploid	103.316
lib230331_AGCATCAAGCACGTCC-1	CTB	0.585714	Euploid	99.2503
lib230331_AGCGCTGGTTAGAAAC-1	CTB	0.542857	Euploid	104.718
lib230331_AGCGCTGTCTCTATAC-1	CTB	0.585714	Euploid	83.854
lib230331_AGGAATAGTCCTCCTA-1	CTB	0.585714	Euploid	92.557
lib230331_AGGAGGTGTGCCTTCT-1	CTB	0.585714	Euploid	66.1471
lib230331_AGGATAATCAAGTCTG-1	EVT	0.3382	Euploid	35.1179
lib230331_AGGGAGTTCAAGTCTG-1	CTB	0.282353	Euploid	113.563
lib230331_AGGGCTCGTTAAGACA-1	CTB	0.282353	Euploid	47.8982
lib230331_AGGGTGAAGTTGCGCC-1	CTB	0.585714	Euploid	74.2919
lib230331_AGGGTTTCATGCCATA-1	EPI	0.713816	Aneuploid	120.39
lib230331_AGGTAGGTCAAGTAAG-1	STB	0.3382	Euploid	216.5
lib230331_AGGTTACGTACCCGAC-1	EVT	0.3382	Euploid	150.29
lib230331_AGTAGTCGTAGGAAAG-1	CTB	0.542857	Euploid	107.909
lib230331_AGTGCCGTCTAAGCCA-1	STB	0.3382	Euploid	198.871
lib230331_AGTGTTGCACCCTTAC-1	STB	0.282353	Euploid	45.1022
lib230331_ATACCTTCACTCATAG-1	CTB	0.585714	Euploid	115.29
lib230331_ATACTTCCACAGCTGC-1	CTB	0.585714	Euploid	73.967
lib230331_ATAGACCAGAGTCTGG-1	CTB	0.585714	Euploid	71.1133
lib230331_ATAGAGAGTGTGTCCG-1	CTB	0.585714	Euploid	124.027
lib230331_ATATCCTAGTTCTACG-1	EPI	0.585714	Euploid	130.287
lib230331_ATCACGATCATTCGTT-1	CTB	0.585714	Euploid	108.975
lib230331_ATCGATGGTGTGCTTA-1	CTB	0.585714	Euploid	100.295
lib230331_ATCGCCTCAAGGCAAC-1	STB	0.282353	Euploid	44.4991
lib230331_ATCGCCTCAGTGGCTC-1	CTB	0.585714	Euploid	88.3125
lib230331_ATCGGATCAGTGCCTG-1	STB	0.282353	Euploid	52.5976
lib230331_ATCGTAGAGTCGCCCA-1	CTB	0.282353	Euploid	56.433
lib230331_ATCGTCCAGGCTCCCA-1	CTB	0.542857	Euploid	76.4506
lib230331_ATCGTGACAGAGAAAG-1	STB	0.542857	Euploid	62.9989
lib230331_ATCTTCAGTGAGGCAT-1	STB	0.282353	Euploid	21.3732
lib230331_ATGACCACATGGCCAC-1	CTB	0.585714	Euploid	62.0826
lib230331_ATGCGATGTTCTAACG-1	STB	0.282353	Euploid	111.54
lib230331_ATGGGAGGTTCGGCCA-1	CTB	0.542857	Euploid	87.855
lib230331_ATTATCCAGTGATAAC-1	CTB	0.585714	Euploid	57.4398
lib230331_ATTCCATGTTGCTCGG-1	EVT	0.3382	Euploid	112.51
lib230331_ATTCTTGCAACTTCTT-1	STB	0.542857	Euploid	46.6257
lib230331_ATTTACCGTGCATCTA-1	CTB	0.585714	Euploid	59.2071
lib230331_CAAGAGGTCAACACGT-1	EVT	0.3382	Euploid	92.4514
lib230331_CAAGCTAGTAATGATG-1	CTB	0.585714	Euploid	90.8774
lib230331_CAATTTCCATAACAGA-1	CTB	0.282353	Euploid	53.1407
lib230331_CACAGATAGAGGGCGA-1	CTB	0.585714	Euploid	90.1694
lib230331_CACAGATTCCACTTCG-1	CTB	0.542857	Euploid	89.5359
lib230331_CACAGATTCCTTACCG-1	CTB	0.542857	Euploid	100.872
lib230331_CACAGGCAGCCACAAG-1	CTB	0.542857	Euploid	87.1218
lib230331_CACAGGCTCAGCTGTA-1	CTB	0.542857	Euploid	76.9104
lib230331_CACGGGTAGCACCGTC-1	CTB	0.542857	Euploid	75.7795
lib230331_CACGGGTCACATGTTG-1	EPI	0.713816	Aneuploid	102.619
lib230331_CAGATACTCACGAGGA-1	STB	0.282353	Euploid	12.7275
lib230331_CAGATTGGTCATCAGT-1	CTB	0.542857	Euploid	113.663
lib230331_CAGGCCACATGCTGCG-1	EVT	0.3382	Euploid	185.437
lib230331_CAGGTATCATAGTCAC-1	EPI	0.713816	Aneuploid	98.6543
lib230331_CATACAGTCAGCTTCC-1	CTB	0.282353	Euploid	89.6778
lib230331_CATAGACCAGACCTAT-1	CTB	0.542857	Euploid	78.1201
lib230331_CATCCACCACCACTGG-1	CTB	0.585714	Euploid	106.582
lib230331_CATCCACCACCAGGTC-1	STB	0.282353	Euploid	131.391
lib230331_CATCCACGTGGTCCCA-1	STB	0.282353	Euploid	63.51
lib230331_CATCGGGAGCGGATCA-1	CTB	0.542857	Euploid	120.481
lib230331_CATCGTCCAACCGTGC-1	EVT	0.3382	Euploid	178.227
lib230331_CATGAGTAGGCTGGAT-1	CTB	0.585714	Euploid	103.829
lib230331_CATGCAACACCGTGCA-1	CTB	0.585714	Euploid	108.939
lib230331_CATGCGGCATCCGTGG-1	CTB	0.585714	Euploid	79.2121
lib230331_CATTCCGGTCGAGTGA-1	CTB	0.585714	Euploid	80.063
lib230331_CCAATGAGTTGTGGCC-1	CTB	0.542857	Euploid	128.504
lib230331_CCACCATAGATGAACT-1	STB	0.3382	Euploid	247.286
lib230331_CCATCACTCATTTACC-1	CTB	0.585714	Euploid	131.384
lib230331_CCCGAAGCAAGGCAAC-1	EVT	0.3382	Euploid	64.328
lib230331_CCCGAAGTCCAGCCTT-1	CTB	0.542857	Euploid	59.4194
lib230331_CCCTAACTCATTGTGG-1	CTB	0.585714	Euploid	113.811
lib230331_CCGTTCAGTCCTATAG-1	EVT	0.282353	Euploid	124.003
lib230331_CCTACGTAGGATGTTA-1	CTB	0.3382	Euploid	103.522
lib230331_CCTATCGAGTTGGACG-1	STB	0.282353	Euploid	105.335
lib230331_CCTCAACCAGGTTCAT-1	CTB	0.542857	Euploid	104.493
lib230331_CCTCTAGGTGGTGATG-1	CTB	0.282353	Euploid	101.941
lib230331_CCTCTAGTCTTACGTT-1	CTB	0.585714	Euploid	102.006
lib230331_CCTGTTGCAGATTAAG-1	EPI	0.713816	Aneuploid	90.891
lib230331_CGAAGTTCATTCTCCG-1	CTB	0.585714	Euploid	106.658
lib230331_CGAGAAGTCCATCCGT-1	CTB	0.542857	Euploid	104.02
lib230331_CGATGCGAGTGGATTA-1	STB	0.282353	Euploid	48.7861
lib230331_CGCATAAAGGCCTTCG-1	CTB	0.542857	Euploid	103.871
lib230331_CGCATAAGTGGCTGCT-1	CTB	0.585714	Euploid	101.712
lib230331_CGCGTGAAGCACCGAA-1	EPI	0.713816	Aneuploid	99.5345
lib230331_CGGACACAGCATCAAA-1	CTB	0.282353	Euploid	21.8203
lib230331_CGGAGAATCGGAGCAA-1	CTB	0.585714	Euploid	114.425
lib230331_CGTCAAAAGTACTGTC-1	CTB	0.282353	Euploid	90.1268
lib230331_CGTGTCTGTTACGCCG-1	EVT	0.3382	Euploid	105.333
lib230331_CTAACTTCAGCTTTCC-1	EPI	0.713816	Aneuploid	131.297
lib230331_CTAGACAGTGCCTAAT-1	CTB	0.585714	Euploid	102.758
lib230331_CTATCTACACAGCCAC-1	EVT	0.3382	Euploid	37.1222
lib230331_CTCACTGAGAGTCTGG-1	CTB	0.585714	Euploid	71.3425
lib230331_CTCAGGGTCGTCACCT-1	CTB	0.585714	Euploid	68.6089
lib230331_CTCATGCTCGAAGTGG-1	CTB	0.282353	Euploid	92.371
lib230331_CTCCATGAGTGGCAGT-1	STB	0.282353	Euploid	106.267
lib230331_CTCGAGGCAATCCTAG-1	EPI	0.713816	Aneuploid	117.098
lib230331_CTCTCAGAGTCATCGT-1	STB	0.282353	Euploid	72.6213
lib230331_CTGAGCGAGGGAGGGT-1	CTB	0.585714	Euploid	81.169
lib230331_CTGCCTATCATCCTGC-1	EVT	0.3382	Euploid	61.5647
lib230331_CTGGCAGTCCCTTGGT-1	CTB	0.542857	Euploid	114.708
lib230331_CTGTATTTCAATCAGC-1	CTB	0.542857	Euploid	98.9186
lib230331_CTTCCTTAGCTTTGTG-1	EVT	0.3382	Euploid	97.3133
lib230331_CTTCCTTAGTCCTACA-1	EPI	0.585714	Euploid	105.07
lib230331_CTTCTCTCACACCTAA-1	EVT	0.3382	Euploid	54.9206
lib230331_CTTGAGAGTCAGGAGT-1	CTB	0.542857	Euploid	107.544
lib230331_CTTTCAATCGAACCTA-1	CTB	0.542857	Euploid	105.512
lib230331_GAAACCTAGATTAGTG-1	CTB	0.282353	Euploid	97.6287
lib230331_GAATCGTTCGGCATCG-1	CTB	0.585714	Euploid	126.837
lib230331_GACACGCTCTTCGTAT-1	STB	0.282353	Euploid	102.753
lib230331_GACATCAAGGATATGT-1	STB	0.282353	Euploid	95.8517
lib230331_GACATCACAAATGGTA-1	CTB	0.585714	Euploid	79.6679
lib230331_GACCGTGAGCACACAG-1	EVT	0.3382	Euploid	100.867
lib230331_GACCTTCTCCATCGTC-1	STB	0.282353	Euploid	76.5517
lib230331_GACGCTGCAGATCATC-1	STB	0.542857	Euploid	26.8757
lib230331_GAGAAATAGTCAATCC-1	CTB	0.585714	Euploid	94.2957
lib230331_GAGAAATCAAAGAACT-1	CTB	0.585714	Euploid	80.9361
lib230331_GAGAGGTAGAGCACTG-1	CTB	0.3382	Euploid	106.236
lib230331_GAGAGGTGTTGCGTAT-1	CTB	0.585714	Euploid	97.3161
lib230331_GAGGGATCAGAAACCG-1	CTB	0.282353	Euploid	71.0473
lib230331_GAGGGTATCCTACCAC-1	CTB	0.585714	Euploid	109.636
lib230331_GAGTGTTCACATATCG-1	CTB	0.585714	Euploid	81.3304
lib230331_GAGTTGTCAACGGTAG-1	CTB	0.585714	Euploid	92.3048
lib230331_GATGACTTCAGTCACA-1	EPI	0.585714	Euploid	115.189
lib230331_GATGTTGCAACGATTC-1	CTB	0.282353	Euploid	22.1343
lib230331_GATGTTGCAGCTGTAT-1	EVT	0.3382	Euploid	50.1752
lib230331_GATTCTTTCCGACATA-1	CTB	0.542857	Euploid	36.5352
lib230331_GATTTCTGTTATCTGG-1	CTB	0.542857	Euploid	114.037
lib230331_GCACGGTCAGGAACCA-1	STB	0.282353	Euploid	23.4633
lib230331_GCAGCTGTCGGTCTGG-1	CTB	0.542857	Euploid	104.839
lib230331_GCCAGCAGTCCGCAGT-1	CTB	0.585714	Euploid	100.68
lib230331_GCCATTCAGACAACTA-1	EVT	0.3382	Euploid	90.6586
lib230331_GCCATTCGTGAAGCGT-1	CTB	0.585714	Euploid	136.581
lib230331_GCGATCGAGCGCCCAT-1	EVT	0.282353	Euploid	38.9177
lib230331_GCTACCTCACCGGAAA-1	CTB	0.282353	Euploid	50.189
lib230331_GCTCAAAGTGAATGAT-1	EVT	0.282353	Euploid	30.2747
lib230331_GCTGAATAGATGACCG-1	EVT	0.3382	Euploid	103.911
lib230331_GGAATGGCAAACGGCA-1	CTB	0.585714	Euploid	87.8073
lib230331_GGATGTTAGTCACAGG-1	CTB	0.585714	Euploid	85.3518
lib230331_GGCTGTGCAATAACGA-1	STB	0.282353	Euploid	60.1596
lib230331_GGCTTGGTCACCATGA-1	CTB	0.585714	Euploid	54.4313
lib230331_GGGACCTTCTCATTAC-1	CTB	0.542857	Euploid	125.935
lib230331_GGGCCATTCAAGGAGC-1	CTB	0.585714	Euploid	90.3555
lib230331_GGGTGAACACACCGCA-1	CTB	0.585714	Euploid	74.4703
lib230331_GGGTGAACATCATTGG-1	CTB	0.542857	Euploid	106.044
lib230331_GGTGAAGAGTAGAATC-1	EVT	0.3382	Euploid	36.3501
lib230331_GTAATGCTCTTTCGAT-1	EPI	0.713816	Aneuploid	122.949
lib230331_GTACAACAGAACTCCT-1	CTB	0.585714	Euploid	71.493
lib230331_GTACAGTTCGCACGAC-1	CTB	0.542857	Euploid	118.774
lib230331_GTAGAGGAGGAACTCG-1	STB	0.3382	Euploid	155.41
lib230331_GTAGCTATCACCTCGT-1	CTB	0.542857	Euploid	96.2007
lib230331_GTATTTCTCTCTAGGA-1	CTB	0.282353	Euploid	41.8946
lib230331_GTCATCCAGGTTGGAC-1	CTB	0.542857	Euploid	102.509
lib230331_GTCGTAAGTCATTGCA-1	CTB	0.542857	Euploid	115.021
lib230331_GTCGTTCGTCGTACTA-1	CTB	0.585714	Euploid	71.8277
lib230331_GTCTGTCAGTTCATGC-1	CTB	0.585714	Euploid	79.5292
lib230331_GTCTGTCCAAGAGTAT-1	CTB	0.542857	Euploid	88.6242
lib230331_GTGAGTTTCACCATCC-1	CTB	0.585714	Euploid	100.183
lib230331_GTGCTGGCAACCGGAA-1	CTB	0.542857	Euploid	76.2235
lib230331_GTGGTTATCAGTCTTT-1	CTB	0.282353	Euploid	67.2449
lib230331_GTGTGATCACTCCTTG-1	CTB	0.585714	Euploid	97.9687
lib230331_GTGTGGCCAGACTGCC-1	CTB	0.542857	Euploid	108.094
lib230331_GTTACGAAGAGAGGGC-1	CTB	0.585714	Euploid	99.9892
lib230331_GTTACGAGTTCTCCAC-1	CTB	0.542857	Euploid	90.966
lib230331_GTTAGACCACGCAGTC-1	EVT	0.3382	Euploid	51.0131
lib230331_GTTCATTAGACCAGAC-1	CTB	0.282353	Euploid	89.1614
lib230331_GTTCGCTCAATAGTAG-1	CTB	0.585714	Euploid	70.8231
lib230331_GTTGTGAAGACGCATG-1	EPI	0.585714	Euploid	86.4821
lib230331_TAAGCGTCACCAAAGG-1	CTB	0.585714	Euploid	85.121
lib230331_TACCCACTCTCCGAGG-1	STB	0.3382	Euploid	191.446
lib230331_TACCCGTCATCTAGAC-1	CTB	0.542857	Euploid	110.552
lib230331_TACCGAAGTAACAAGT-1	CTB	0.542857	Euploid	102.154
lib230331_TACCGGGGTAGCGTAG-1	CTB	0.542857	Euploid	103.127
lib230331_TACCTGCCATACTGAC-1	EVT	0.3382	Euploid	174.651
lib230331_TACGGTATCAACCTCC-1	STB	0.3382	Euploid	167.526
lib230331_TACTTCAGTGAGCAGT-1	EVT	0.282353	Euploid	29.6996
lib230331_TACTTCATCGGTGTAT-1	CTB	0.585714	Euploid	81.9311
lib230331_TAGACTGAGCTAATCC-1	CTB	0.585714	Euploid	61.232
lib230331_TAGAGTCAGGATGGCT-1	CTB	0.585714	Euploid	83.7219
lib230331_TAGGTACCATAAGCAA-1	CTB	0.282353	Euploid	86.405
lib230331_TAGTGCACACATGACT-1	CTB	0.542857	Euploid	111.358
lib230331_TATCTGTAGCCGATCC-1	CTB	0.542857	Euploid	52.6301
lib230331_TATCTGTCACACTGGC-1	STB	0.585714	Euploid	101.354
lib230331_TATCTGTCATCACCAA-1	CTB	0.585714	Euploid	112.018
lib230331_TATCTTGCATGAAGGC-1	CTB	0.585714	Euploid	83.8947
lib230331_TATGTTCGTATTAAGG-1	CTB	0.585714	Euploid	103.227
lib230331_TATGTTCGTCTACTGA-1	CTB	0.282353	Euploid	51.6336
lib230331_TATTCCATCGTCCATC-1	STB	0.282353	Euploid	12.9207
lib230331_TATTGCTAGTCATACC-1	CTB	0.585714	Euploid	89.0129
lib230331_TCAATCTGTGTGTGTT-1	CTB	0.542857	Euploid	104.095
lib230331_TCACAAGAGTGCGACA-1	CTB	0.585714	Euploid	119.341
lib230331_TCACGCTCAACCGCCA-1	CTB	0.585714	Euploid	104.382
lib230331_TCACTCGAGGTTCAGG-1	CTB	0.585714	Euploid	79.4204
lib230331_TCAGGTAGTATTCCTT-1	CTB	0.585714	Euploid	64.1806
lib230331_TCAGGTAGTGGCATCC-1	EVT	0.3382	Euploid	97.3062
lib230331_TCATCCGCACAGTCCG-1	CTB	0.585714	Euploid	99.5569
lib230331_TCATTCACAACTGCTA-1	CTB	0.542857	Euploid	105.418
lib230331_TCCAGAACAGCAGGAT-1	EVT	0.3382	Euploid	124.057
lib230331_TCCCAGTCAACTAGAA-1	CTB	0.585714	Euploid	80.197
lib230331_TCCCAGTTCTAGTTCT-1	EVT	0.3382	Euploid	76.4404
lib230331_TCCCATGGTCGTGATT-1	CTB	0.585714	Euploid	112.177
lib230331_TCCGATCAGTTCCAGT-1	CTB	0.585714	Euploid	74.5449
lib230331_TCCTGCATCGGCGATC-1	CTB	0.585714	Euploid	110.606
lib230331_TCCTTCTGTATTTCCT-1	EVT	0.3382	Euploid	116.618
lib230331_TCCTTTCCATGAAGGC-1	CTB	0.585714	Euploid	102.142
lib230331_TCGAACACAAGCGGAT-1	EVT	0.3382	Euploid	113.241
lib230331_TCGCACTTCCATTCGC-1	CTB	0.542857	Euploid	64.1237
lib230331_TCGCTCATCCTTTAGT-1	CTB	0.585714	Euploid	54.3694
lib230331_TCGGTCTAGTTGTAAG-1	CTB	0.542857	Euploid	105.61
lib230331_TCTAACTGTTGACTAC-1	CTB	0.585714	Euploid	89.0535
lib230331_TCTATACGTTCCAAAC-1	CTB	0.585714	Euploid	49.2195
lib230331_TCTATCATCTGTCGCT-1	CTB	0.542857	Euploid	102.426
lib230331_TCTCACGCAACAGATA-1	EPI	0.542857	Euploid	104.016
lib230331_TCTCAGCAGGTGATAT-1	CTB	0.585714	Euploid	116.956
lib230331_TCTCAGCGTCAACACT-1	EVT	0.282353	Euploid	35.0324
lib230331_TCTCCGAAGTTTAGGA-1	CTB	0.585714	Euploid	65.0641
lib230331_TCTCTGGTCGAATGCT-1	CTB	0.585714	Euploid	44.2856
lib230331_TCTGCCATCACGACTA-1	STB	0.282353	Euploid	98.6563
lib230331_TCTTAGTCATGGCTGC-1	CTB	0.282353	Euploid	83.3622
lib230331_TGAGACTCAAATCAGA-1	CTB	0.282353	Euploid	31.9807
lib230331_TGAGCGCCATCGGATT-1	EVT	0.3382	Euploid	71.6118
lib230331_TGATTCTGTATCTCGA-1	CTB	0.585714	Euploid	97.0693
lib230331_TGATTCTTCAGCTGTA-1	STB	0.282353	Euploid	85.4563
lib230331_TGATTTCCAACAACAA-1	CTB	0.542857	Euploid	93.6937
lib230331_TGCAGGCTCTTACGGA-1	CTB	0.585714	Euploid	85.8237
lib230331_TGCATCCCAATCCAGT-1	CTB	0.542857	Euploid	61.2212
lib230331_TGCCGAGAGGTGTGAC-1	CTB	0.542857	Euploid	56.8907
lib230331_TGCCGAGAGTAGACAT-1	CTB	0.585714	Euploid	65.5718
lib230331_TGCGGCAGTATCGCTA-1	STB	0.282353	Euploid	71.9752
lib230331_TGCGGGTCAGTAACAA-1	CTB	0.585714	Euploid	49.0411
lib230331_TGCTGAAAGGATACAT-1	STB	0.282353	Euploid	73.4553
lib230331_TGGAACTAGTAACGTA-1	STB	0.282353	Euploid	87.8154
lib230331_TGGGATTTCTTACCGC-1	CTB	0.542857	Euploid	104.454
lib230331_TGTCCACAGGCCATAG-1	CTB	0.542857	Euploid	83.6838
lib230331_TGTCCCAGTCATTCCC-1	EVT	0.3382	Euploid	89.0712
lib230331_TGTCCTGGTCCCGGTA-1	CTB	0.542857	Euploid	102.916
lib230331_TGTGAGTCACCATTCC-1	CTB	0.282353	Euploid	95.7356
lib230331_TGTGGCGGTGGTTCTA-1	CTB	0.585714	Euploid	101.224
lib230331_TGTTCATTCAAGCTTG-1	CTB	0.585714	Euploid	67.7663
lib230331_TTACCGCTCGTGCAGC-1	CTB	0.542857	Euploid	122.704
lib230331_TTACGCCCACAGTCCG-1	CTB	0.585714	Euploid	73.121
lib230331_TTCAATCTCGATCCCT-1	CTB	0.585714	Euploid	69.442
lib230331_TTCATGTGTCTACGTA-1	CTB	0.282353	Euploid	184.835
lib230331_TTCGGTCCATGCCATA-1	CTB	0.585714	Euploid	81.0451
lib230331_TTCGGTCGTTCCCAAA-1	EVT	0.3382	Euploid	79.7673
lib230331_TTCTCTCCATGACAGG-1	EVT	0.3382	Euploid	100.596
lib230331_TTGCATTAGCATACTC-1	CTB	0.3382	Euploid	102.241
lib230331_TTGCCTGAGTAGATCA-1	CTB	0.282353	Euploid	54.4962
lib230331_TTGCGTCAGAGGATCC-1	STB	0.282353	Euploid	81.1619
lib230331_TTGGATGAGGGAGATA-1	CTB	0.542857	Euploid	122.577
lib230331_TTGGATGCAGAGGCAT-1	STB	0.3382	Euploid	215.457
lib230331_TTGTTTGGTATCGTGT-1	CTB	0.585714	Euploid	110.075
lib230331_AACGAAACAATGTTGC-1	STB	0.782609	Aneuploid	85.5091
lib230331_AAGACAACACATACTG-1	STB	1	Aneuploid	267.294
lib230331_AAGCCATGTGGATTTC-1	STB	1	Aneuploid	244.156
lib230331_AATGCCACATCTAACG-1	STB	0.782609	Aneuploid	143.366
lib230331_ACAGAAAGTCTTCTAT-1	STB	1	Aneuploid	210.908
lib230331_ACATCCCTCCTTTAGT-1	STB	1	Aneuploid	266.736
lib230331_ACATTTCAGTCTACCA-1	CTB	0.782609	Aneuploid	91.6991
lib230331_ACCAACATCTGGCCGA-1	STB	1	Aneuploid	254.997
lib230331_ACCTGAATCCTACTGC-1	STB	0.782609	Aneuploid	107.264
lib230331_ACCTGTCCAGAACCGA-1	STB	0.782609	Aneuploid	125.565
lib230331_ACGTACACAGGAGACT-1	STB	0.782609	Aneuploid	96.7661
lib230331_AGAACCTGTCAGGAGT-1	STB	1	Aneuploid	228.619
lib230331_AGCCAGCCACAGAAGC-1	STB	0.782609	Aneuploid	93.4237
lib230331_AGCGCCAAGCTAAGTA-1	STB	0.782609	Aneuploid	84.7079
lib230331_AGGACTTGTTGGGCCT-1	STB	0.782609	Aneuploid	90.7157
lib230331_AGGTCTAAGGATTCAA-1	STB	0.782609	Aneuploid	106.086
lib230331_AGGTTACAGACCAACG-1	STB	0.782609	Aneuploid	142.199
lib230331_AGTAGTCAGTGTTCCA-1	CTB	0.782609	Aneuploid	63.6685
lib230331_AGTCACAAGCCTGACC-1	STB	0.782609	Aneuploid	111.73
lib230331_ATCACGAAGGAGTCTG-1	CTB	0.782609	Aneuploid	65.6806
lib230331_ATCCATTTCGCGTAGC-1	STB	0.782609	Aneuploid	137.664
lib230331_ATCGTGATCGAGCTGC-1	STB	0.782609	Aneuploid	103.961
lib230331_ATCTTCAGTACCACGC-1	STB	0.782609	Aneuploid	91.0186
lib230331_ATGTCTTCATTATGCG-1	STB	1	Aneuploid	258.478
lib230331_ATTGTTCAGGAACGCT-1	STB	0.782609	Aneuploid	113.921
lib230331_CAAAGAACAAATACGA-1	EVT	1	Aneuploid	243.886
lib230331_CACCGTTGTTGCGTAT-1	STB	0.782609	Aneuploid	134.356
lib230331_CAGTTAGGTACGGATG-1	CTB	0.782609	Aneuploid	106.145
lib230331_CATACCCGTTCTCAGA-1	STB	0.782609	Aneuploid	91.2041
lib230331_CATAGACCACTACTTT-1	STB	0.782609	Aneuploid	117.167
lib230331_CCGGGTATCATGACAC-1	STB	1	Aneuploid	212.074
lib230331_CCTACGTTCCTCAGGG-1	STB	1	Aneuploid	215.672
lib230331_CGCAGGTCAGTGGCTC-1	STB	0.782609	Aneuploid	102.658
lib230331_CGCCATTAGGCCACTC-1	STB	0.782609	Aneuploid	56.1719
lib230331_CGGCAGTCATTCTCCG-1	EVT	1	Aneuploid	290.764
lib230331_CGTAATGAGTCACTCA-1	STB	1	Aneuploid	243.32
lib230331_CGTGCTTAGTGGTGAC-1	EVT	0.782609	Aneuploid	13.0217
lib230331_CGTTGGGAGTGTTCCA-1	STB	1	Aneuploid	236.18
lib230331_CGTTGGGGTTGGCCTG-1	STB	0.782609	Aneuploid	135.128
lib230331_CTAGGTACAACCCGCA-1	CTB	0.782609	Aneuploid	78.7789
lib230331_CTATCCGCAATCTCGA-1	CTB	0.782609	Aneuploid	77.8308
lib230331_CTCATCGAGTCCCAAT-1	STB	0.782609	Aneuploid	90.0711
lib230331_CTCTCGATCTCTGACC-1	STB	0.782609	Aneuploid	114.558
lib230331_CTGAGGCAGATAGTGT-1	STB	0.782609	Aneuploid	88.5252
lib230331_CTGTAGAGTGCCTAAT-1	STB	0.782609	Aneuploid	64.2528
lib230331_GAAGGACTCCCAAGCG-1	STB	0.782609	Aneuploid	130.62
lib230331_GATCATGCAGACCTGC-1	STB	1	Aneuploid	221.808
lib230331_GCATGATAGGCTCAAG-1	STB	1	Aneuploid	259.521
lib230331_GCCAGTGAGACCACGA-1	STB	1	Aneuploid	248.859
lib230331_GGAATCTGTCATCTAG-1	STB	0.782609	Aneuploid	91.4814
lib230331_GGAGGTACACATCCCT-1	STB	0.782609	Aneuploid	103.426
lib230331_GGCACGTAGGGCGAAG-1	STB	0.782609	Aneuploid	65.7833
lib230331_GGGCTCATCGGCTCTT-1	STB	0.782609	Aneuploid	154.585
lib230331_GTAATCGCACAATTCG-1	STB	0.782609	Aneuploid	128.164
lib230331_GTCATCCCAGAACTAA-1	STB	0.782609	Aneuploid	124.585
lib230331_GTCCTCAGTAGTTCCA-1	STB	0.782609	Aneuploid	22.0787
lib230331_GTTATGGCAAGATGGC-1	STB	0.782609	Aneuploid	101.054
lib230331_TACTTACTCTACCTTA-1	STB	0.782609	Aneuploid	129.382
lib230331_TAGCACAAGAGGTTTA-1	STB	0.782609	Aneuploid	92.0688
lib230331_TCCAGAAGTATACGGG-1	CTB	0.782609	Aneuploid	96.5767
lib230331_TCCCAGTTCTGGTTGA-1	STB	0.782609	Aneuploid	95.6375
lib230331_TCCGATCGTCTAGGTT-1	STB	0.782609	Aneuploid	157.725
lib230331_TCGCACTTCATTACGG-1	STB	0.782609	Aneuploid	98.2221
lib230331_TCGGGCACATAGATGA-1	CTB	0.782609	Aneuploid	64.0148
lib230331_TCTAACTAGTATCTGC-1	STB	0.782609	Aneuploid	41.3189
lib230331_TCTACATAGAATAACC-1	STB	0.782609	Aneuploid	115.658
lib230331_TGAGCATAGATGTTCC-1	STB	0.782609	Aneuploid	118.164
lib230331_TGAGGGACAAGGTCTT-1	STB	0.782609	Aneuploid	167.304
lib230331_TGCTTCGTCTCGTGAA-1	STB	0.782609	Aneuploid	145.986
lib230331_TTCCTTCTCTTACTGT-1	STB	0.782609	Aneuploid	97.8938
lib2_AACCTTTAGCGACTGA-1	CTB	0.385965	Euploid	80.5606
lib2_AACCTTTTCCGCAAAT-1	CTB	0.523161	Euploid	121.262
lib2_AACGAAATCATCACTT-1	EPI	1	Aneuploid	140.558
lib2_AACTTCTCAATGCAGG-1	CTB	0.523161	Euploid	121.71
lib2_AAGAACACAACGTATC-1	CTB	0.504087	Euploid	103.412
lib2_AAGACAACATGATGCT-1	CTB	0.504087	Euploid	117.95
lib2_AAGACTCCACCGGTCA-1	CTB	0.523161	Euploid	139.043
lib2_AAGCCATAGGAGCTGT-1	CTB	0.504087	Euploid	139.269
lib2_AAGTCGTTCTTGGAAC-1	STB	0.828571	Aneuploid	144.128
lib2_AATCACGTCCTTCTAA-1	CTB	0.385965	Euploid	137.323
lib2_AATCGACTCGTCAGAT-1	CTB	0.523161	Euploid	172.548
lib2_AATTCCTCAGTATACC-1	CTB	0.523161	Euploid	118.878
lib2_ACAAAGATCATTCGGA-1	EPI	1	Aneuploid	150.6
lib2_ACAAGCTTCTCTGCCA-1	STB	0.828571	Aneuploid	150.832
lib2_ACAGAAAAGCCTCTGG-1	CTB	0.385965	Euploid	91.3858
lib2_ACATTTCCACGCACCA-1	STB	0.828571	Aneuploid	168.926
lib2_ACCCTTGTCGCTCATC-1	EPI	1	Aneuploid	155.979
lib2_ACCGTTCGTTTCACAG-1	CTB	0.523161	Euploid	122.965
lib2_ACCTACCGTCTGTCCT-1	CTB	0.523161	Euploid	190.257
lib2_ACGCACGCATTACGGT-1	CTB	0.504087	Euploid	124.639
lib2_ACGCACGGTACGACAG-1	CTB	0.523161	Euploid	195.428
lib2_ACGTAGTAGGAGAGTA-1	CTB	0.523161	Euploid	184.467
lib2_ACGTAGTGTGAGACCA-1	CTB	0.504087	Euploid	133.847
lib2_ACGTCCTTCGGCTTGG-1	CTB	0.504087	Euploid	130.252
lib2_ACTATCTTCTGTCGTC-1	STB	0.828571	Aneuploid	136.921
lib2_ACTATTCTCAGACTGT-1	STB	0.828571	Aneuploid	156.796
lib2_ACTGTCCTCTCAAAGC-1	STB	0.828571	Aneuploid	161.467
lib2_ACTTATCTCTTAGCCC-1	STB	0.828571	Aneuploid	144.732
lib2_ACTTTGTGTATCGAAA-1	CTB	0.523161	Euploid	162.762
lib2_AGAAGTAAGCGCTGAA-1	CTB	0.523161	Euploid	152.563
lib2_AGACACTAGGTGCTAG-1	CTB	0.523161	Euploid	149.188
lib2_AGACACTTCAGGACGA-1	CTB	0.757493	Aneuploid	156.542
lib2_AGACACTTCTTCACGC-1	CTB	0.523161	Euploid	119.183
lib2_AGAGAATGTCTCACGG-1	CTB	0.523161	Euploid	139.985
lib2_AGCATCATCACAAGAA-1	CTB	0.385965	Euploid	114.912
lib2_AGCCAATTCCTTATCA-1	CTB	0.385965	Euploid	77.0721
lib2_AGCCACGCATGTTCAG-1	CTB	0.523161	Euploid	141.627
lib2_AGCGATTTCCAAGGGA-1	CTB	0.504087	Euploid	210.874
lib2_AGCGTATTCTGGAAGG-1	STB	0.828571	Aneuploid	163.089
lib2_AGCTTCCCAGGTATGG-1	CTB	0.504087	Euploid	155.057
lib2_AGCTTCCGTGTTTACG-1	STB	0.828571	Aneuploid	156.602
lib2_AGGATCTTCTTCTCAA-1	STB	0.828571	Aneuploid	121.268
lib2_AGGCTGCTCTCTCAAT-1	EVT	0.898113	Aneuploid	400.828
lib2_AGGGTTTGTGGCGTAA-1	CTB	0.523161	Euploid	163.989
lib2_AGGTCTATCCTTATGT-1	EVT	0.828571	Aneuploid	204.182
lib2_AGGTTACCAGAGATGC-1	CTB	0.504087	Euploid	136.922
lib2_AGGTTACTCTATCGCC-1	EPI	1	Aneuploid	108.996
lib2_AGGTTGTTCCTATTTG-1	EPI	1	Aneuploid	123.045
lib2_AGTGCCGAGCGATTCT-1	CTB	0.523161	Euploid	149.686
lib2_AGTGTTGAGTCAGAGC-1	CTB	0.504087	Euploid	149.34
lib2_ATACTTCGTGTAAATG-1	CTB	0.504087	Euploid	129.391
lib2_ATAGGCTAGACCATGG-1	CTB	0.523161	Euploid	154.834
lib2_ATCACAGCAGAACTCT-1	CTB	0.385965	Euploid	90.0033
lib2_ATCAGGTAGGTTCACT-1	EVT	0.898113	Aneuploid	376.655
lib2_ATCCACCGTTTCACAG-1	EVT	0.898113	Aneuploid	336.172
lib2_ATCCGTCAGCCTGTGC-1	CTB	0.523161	Euploid	111.185
lib2_ATCCGTCGTCTACTGA-1	CTB	0.523161	Euploid	148.949
lib2_ATCGATGTCCTCACGT-1	CTB	0.504087	Euploid	171.669
lib2_ATGACCAGTCGTGGTC-1	CTB	0.504087	Euploid	127.454
lib2_ATGGAGGCACGTATAC-1	CTB	0.504087	Euploid	137.424
lib2_ATTACCTTCGAAGGAC-1	EPI	1	Aneuploid	267.376
lib2_ATTACTCAGACGACTG-1	CTB	0.385965	Euploid	103.516
lib2_ATTCACTCATCCTTGC-1	STB	0.828571	Aneuploid	148.081
lib2_ATTCAGGCACGAGAAC-1	STB	0.828571	Aneuploid	173.943
lib2_ATTCCATGTTAATCGC-1	CTB	0.523161	Euploid	185.119
lib2_ATTCTTGAGGATTTGA-1	EPI	1	Aneuploid	170.19
lib2_CAACAGTGTTCACGAT-1	EVT	0.898113	Aneuploid	330.899
lib2_CAACCTCCAGCTGAGA-1	EPI	1	Aneuploid	168.166
lib2_CAACCTCCATCGATAC-1	EPI	1	Aneuploid	202.537
lib2_CAACGATGTTCACGAT-1	EPI	1	Aneuploid	148.49
lib2_CAAGCTACATCGTTCC-1	CTB	0.385965	Euploid	95.4182
lib2_CAATGACCAAGTGACG-1	STB	0.828571	Aneuploid	109.58
lib2_CAATTTCTCGAGAAAT-1	CTB	0.385965	Euploid	84.1022
lib2_CACACAATCGAAGCAG-1	CTB	0.523161	Euploid	154.104
lib2_CACAGATGTGCAATGG-1	CTB	0.385965	Euploid	123.853
lib2_CACGAATTCCGAGTGC-1	CTB	0.523161	Euploid	166.166
lib2_CACGGGTTCCGTGTGG-1	CTB	0.504087	Euploid	151.826
lib2_CACGTGGAGCATTTGC-1	CTB	0.523161	Euploid	123.726
lib2_CACTAAGCACCTATCC-1	CTB	0.504087	Euploid	136.553
lib2_CACTGAAGTGGTCTCG-1	CTB	0.385965	Euploid	165.665
lib2_CACTGGGTCCATGCAA-1	HYPO	0.828571	Aneuploid	232.884
lib2_CACTGGGTCGAGGCAA-1	CTB	0.504087	Euploid	136.338
lib2_CACTGTCCAATCACGT-1	STB	0.828571	Aneuploid	171.203
lib2_CACTGTCTCCATGCAA-1	EPI	1	Aneuploid	172.441
lib2_CAGATCAAGGAGTATT-1	CTB	0.523161	Euploid	186.605
lib2_CAGCAATGTTGTCTAG-1	EPI	1	Aneuploid	160.792
lib2_CAGCCAGGTTGCTTGA-1	EPI	1	Aneuploid	202.772
lib2_CAGCCAGTCTCTCGAC-1	CTB	0.523161	Euploid	106.198
lib2_CAGTTAGTCTTGCGCT-1	STB	0.828571	Aneuploid	157.333
lib2_CATAAGCCACGTTCGG-1	CTB	0.504087	Euploid	142.051
lib2_CATACCCAGTTGGGAC-1	CTB	0.504087	Euploid	173.048
lib2_CATCCGTAGAGGGTGG-1	STB	0.828571	Aneuploid	175.895
lib2_CATCGCTCAATCGCGC-1	CTB	0.385965	Euploid	104.36
lib2_CATCGGGTCTTAGCTT-1	CTB	0.504087	Euploid	149.377
lib2_CATCGTCTCCGTGTAA-1	STB	0.828571	Aneuploid	134.387
lib2_CATGAGTCATTGGCAT-1	CTB	0.523161	Euploid	113.941
lib2_CATGCTCTCGCTGACG-1	STB	0.828571	Aneuploid	118.867
lib2_CATGGATTCCATTTGT-1	CTB	0.504087	Euploid	158.452
lib2_CATTCATGTTAGGCTT-1	CTB	0.504087	Euploid	98.5132
lib2_CATTCCGTCTACGCGG-1	CTB	0.523161	Euploid	170.189
lib2_CATTGTTGTACGATTC-1	EVT	0.898113	Aneuploid	408.132
lib2_CATTGTTGTCGAACGA-1	EPI	1	Aneuploid	213.972
lib2_CCACGTTAGATCCTAC-1	CTB	0.504087	Euploid	194.995
lib2_CCATAAGCATCAGCAT-1	CTB	0.385965	Euploid	80.3158
lib2_CCATAAGCATGTGCTA-1	CTB	0.523161	Euploid	120.534
lib2_CCATCACCAACAAGTA-1	STB	0.828571	Aneuploid	159
lib2_CCCATTGAGAGTTGTA-1	CTB	0.523161	Euploid	165.283
lib2_CCCTCAATCGATCCCT-1	CTB	0.504087	Euploid	134.684
lib2_CCGATGGTCTGGAAGG-1	CTB	0.504087	Euploid	87.1739
lib2_CCGGGTATCACTTGGA-1	CTB	0.504087	Euploid	145.914
lib2_CCGGTGACAGTTGTCA-1	CTB	0.385965	Euploid	121.215
lib2_CCTAACCGTTGCATCA-1	CTB	0.504087	Euploid	135.242
lib2_CCTAACCTCCGCTAGG-1	CTB	0.385965	Euploid	90.2929
lib2_CCTAAGAAGCCGTAAG-1	CTB	0.504087	Euploid	196.952
lib2_CCTAAGAGTTATTCCT-1	CTB	0.385965	Euploid	118.385
lib2_CCTCAACGTGCTGCAC-1	EVT	0.898113	Aneuploid	390.393
lib2_CCTCAGTCAAGCTCTA-1	CTB	0.523161	Euploid	104.792
lib2_CCTCAGTGTGGCTTGC-1	CTB	0.523161	Euploid	170.891
lib2_CCTCAGTTCTCGAGTA-1	EPI	1	Aneuploid	204.483
lib2_CCTCATGTCGCATGAT-1	CTB	0.523161	Euploid	129.593
lib2_CCTGCATGTGGTATGG-1	EPI	1	Aneuploid	179.171
lib2_CCTGCATTCTACTATC-1	CTB	0.504087	Euploid	133.225
lib2_CCTGTTGAGCGAATGC-1	EPI	1	Aneuploid	164.92
lib2_CCTTGTGGTGGACTGA-1	CTB	0.523161	Euploid	141.319
lib2_CGAAGTTTCCATCTCG-1	CTB	0.385965	Euploid	106.536
lib2_CGATCGGCAGAAATTG-1	CTB	0.523161	Euploid	117.318
lib2_CGATCGGGTTTCGACA-1	CTB	0.504087	Euploid	148.041
lib2_CGATGGCCACTACTTT-1	CTB	0.523161	Euploid	151.969
lib2_CGGCAGTCAAACTAAG-1	STB	0.828571	Aneuploid	181.263
lib2_CGGCAGTGTATCTTCT-1	STB	0.828571	Aneuploid	156.353
lib2_CGGGCATAGTACGTCT-1	STB	0.828571	Aneuploid	147.655
lib2_CGTGAATGTCACGCTG-1	CTB	0.504087	Euploid	142.591
lib2_CGTGAATTCGTTACCC-1	CTB	0.385965	Euploid	133.773
lib2_CGTTAGAAGTATGGCG-1	CTB	0.504087	Euploid	131.548
lib2_CTACAGACACACCTTC-1	CTB	0.385965	Euploid	105.289
lib2_CTACTATAGCGGTAAC-1	CTB	1	Aneuploid	151.975
lib2_CTAGGTAAGAATTGCA-1	CTB	0.523161	Euploid	98.9899
lib2_CTATCTAGTCGCATCG-1	STB	0.828571	Aneuploid	113.64
lib2_CTATCTATCAGAGTGG-1	CTB	0.504087	Euploid	134.258
lib2_CTCAATTCAAGCACCC-1	EPI	1	Aneuploid	212.442
lib2_CTCAATTGTATCAAGA-1	CTB	0.523161	Euploid	160.112
lib2_CTCCAACAGCGGGTAT-1	CTB	0.523161	Euploid	144.636
lib2_CTCCACAAGGTCACTT-1	EPI	1	Aneuploid	177.624
lib2_CTCCATGTCAGACATC-1	CTB	0.523161	Euploid	173.88
lib2_CTCCCAATCGGTCGAC-1	CTB	0.523161	Euploid	157.621
lib2_CTCCCAATCTCAGAAC-1	EVT	0.898113	Aneuploid	391.57
lib2_CTCTCAGCAGGGAATC-1	CTB	0.523161	Euploid	144.895
lib2_CTGAGCGCAAATAGCA-1	STB	0.828571	Aneuploid	127.219
lib2_CTGAGGCAGACTCATC-1	CTB	0.523161	Euploid	105.399
lib2_CTGAGGCCAAGCAGGT-1	CTB	0.504087	Euploid	134.931
lib2_CTGATCCAGCAACCAG-1	CTB	0.523161	Euploid	156.218
lib2_CTGCATCCACATTGTG-1	CTB	0.523161	Euploid	116.881
lib2_CTGCCATCAATCTCGA-1	CTB	0.504087	Euploid	148.547
lib2_CTGGACGAGGATGCGT-1	CTB	0.504087	Euploid	157.462
lib2_CTGGACGGTACTAAGA-1	EPI	1	Aneuploid	211.521
lib2_CTGTACCGTCTAGGCC-1	STB	0.828571	Aneuploid	148.918
lib2_CTGTGGGGTCTTCATT-1	CTB	0.504087	Euploid	134.891
lib2_CTTCAATGTGATTCAC-1	CTB	0.523161	Euploid	161.849
lib2_CTTCGGTAGTCACTAC-1	CTB	0.523161	Euploid	148.199
lib2_CTTCTCTGTGGCAACA-1	STB	0.828571	Aneuploid	170.973
lib2_GAACACTGTAGGAGGG-1	STB	0.828571	Aneuploid	165.016
lib2_GAACTGTCAATCACGT-1	CTB	0.504087	Euploid	131.373
lib2_GAACTGTGTAATCAAG-1	STB	0.828571	Aneuploid	166.532
lib2_GACACGCAGACGGTTG-1	CTB	0.523161	Euploid	136.656
lib2_GACATCACAGCACCCA-1	CTB	0.385965	Euploid	129.957
lib2_GACCTTCCAAGCGGAT-1	STB	0.828571	Aneuploid	132.541
lib2_GACTTCCTCCGGGACT-1	CTB	0.523161	Euploid	107.765
lib2_GAGAAATGTCATAGTC-1	STB	0.828571	Aneuploid	160.719
lib2_GAGATGGCAATTCTTC-1	STB	0.828571	Aneuploid	114.687
lib2_GAGCTGCAGCGAGGAG-1	CTB	0.504087	Euploid	133.039
lib2_GAGCTGCTCAGGAACG-1	STB	0.828571	Aneuploid	166.172
lib2_GAGGCAATCCTTCAGC-1	CTB	0.504087	Euploid	151.55
lib2_GAGTCATTCGAGATGG-1	CTB	0.385965	Euploid	146.071
lib2_GAGTTTGCAGGACAGT-1	CTB	0.504087	Euploid	161.641
lib2_GATCATGTCCGCACGA-1	EPI	1	Aneuploid	177.013
lib2_GATCGTAAGCTGTTAC-1	STB	0.828571	Aneuploid	135.204
lib2_GATGATCCACCCATAA-1	CTB	0.385965	Euploid	115.245
lib2_GATGTTGCAGTTACCA-1	CTB	0.504087	Euploid	116.851
lib2_GCAACATAGGTCTGGA-1	CTB	0.504087	Euploid	177.931
lib2_GCAACCGCAGCTGAGA-1	EPI	1	Aneuploid	210.498
lib2_GCACGTGCATGGGATG-1	CTB	0.385965	Euploid	153.411
lib2_GCACGTGGTGTCATTG-1	CTB	0.504087	Euploid	117.989
lib2_GCAGCTGTCTTCCTAA-1	STB	0.828571	Aneuploid	126.597
lib2_GCATGATTCTGAGAGG-1	CTB	0.504087	Euploid	162.448
lib2_GCCAGGTAGTGTTGTC-1	STB	0.828571	Aneuploid	130.071
lib2_GCCAGGTCAGTAGGAC-1	CTB	0.504087	Euploid	165.193
lib2_GCCTGTTTCGGAATGG-1	CTB	0.504087	Euploid	143.481
lib2_GCTCAAACACAGAGAC-1	STB	0.828571	Aneuploid	151.854
lib2_GCTTGGGTCAGCAATC-1	STB	0.828571	Aneuploid	108.415
lib2_GGACGTCTCAGCGCGT-1	EPI	1	Aneuploid	199.971
lib2_GGAGAACGTAGGTTTC-1	CTB	0.504087	Euploid	110.36
lib2_GGAGATGCACAAGCAG-1	CTB	0.504087	Euploid	147.776
lib2_GGAGGATGTAGGTAGC-1	STB	0.828571	Aneuploid	150.639
lib2_GGCACGTGTTTGACAC-1	CTB	0.523161	Euploid	172.635
lib2_GGCAGTCGTAGATCCT-1	CTB	0.385965	Euploid	89.4855
lib2_GGCTTGGTCAGGAGAC-1	CTB	0.504087	Euploid	126.496
lib2_GGGATCCCATCGAACT-1	EPI	1	Aneuploid	130.3
lib2_GGGATGAGTTTGGGAG-1	CTB	0.385965	Euploid	153.079
lib2_GGGCCATTCATAGCAC-1	STB	0.828571	Aneuploid	155.01
lib2_GGGCGTTAGACGACGT-1	CTB	0.504087	Euploid	148.53
lib2_GGGCTACAGCCATATC-1	CTB	0.523161	Euploid	169.387
lib2_GGGTATTCACACCTTC-1	STB	0.828571	Aneuploid	133.509
lib2_GGGTTATAGAGCAGAA-1	STB	0.828571	Aneuploid	140.609
lib2_GGTAACTAGATCCTAC-1	EVT	0.898113	Aneuploid	353.098
lib2_GGTAATCAGTAAATGC-1	EPI	1	Aneuploid	78.6735
lib2_GGTAGAGCATAGTCAC-1	STB	0.828571	Aneuploid	168.601
lib2_GGTGATTTCCGAAGGA-1	CTB	0.523161	Euploid	150.443
lib2_GTACAGTGTTGCGGCT-1	CTB	0.504087	Euploid	130.466
lib2_GTACAGTTCCACGTGG-1	CTB	0.504087	Euploid	172.251
lib2_GTAGATCAGGTGGGTT-1	CTB	0.504087	Euploid	201.955
lib2_GTAGATCCAACTCCAA-1	CTB	0.504087	Euploid	112.994
lib2_GTAGATCTCTAGAGCT-1	CTB	0.523161	Euploid	177.171
lib2_GTCAAGTAGGCGAACT-1	EPI	1	Aneuploid	100.784
lib2_GTCACTCAGCCATTGT-1	STB	0.828571	Aneuploid	162.207
lib2_GTCACTCCACCCTCTA-1	CTB	0.523161	Euploid	147.622
lib2_GTCCACTCATCCCACT-1	CTB	0.504087	Euploid	166.788
lib2_GTCCCATCAAGCCCAC-1	EPI	1	Aneuploid	176.599
lib2_GTCGTTCAGAACGTGC-1	STB	0.828571	Aneuploid	163.876
lib2_GTGACGCGTCTCCTGT-1	CTB	0.504087	Euploid	105.487
lib2_GTGAGGATCGCACTCT-1	CTB	0.523161	Euploid	164.974
lib2_GTGCGTGGTTAATCGC-1	EPI	1	Aneuploid	224.046
lib2_GTGCTTCAGTTCTACG-1	CTB	0.504087	Euploid	126.353
lib2_GTGCTTCGTTCCAAAC-1	STB	0.828571	Aneuploid	167.023
lib2_GTGGAGATCCGATCTC-1	CTB	0.504087	Euploid	195.352
lib2_GTGGGAAGTTCGGGTC-1	STB	0.828571	Aneuploid	125.42
lib2_GTGTTAGCACTGGCCA-1	CTB	0.504087	Euploid	127.284
lib2_GTTAGACGTAGGCTGA-1	CTB	0.523161	Euploid	118.144
lib2_GTTCTATCATCTCGTC-1	EPI	1	Aneuploid	149.126
lib2_GTTGCGGGTTCCGTTC-1	STB	0.828571	Aneuploid	201.169
lib2_GTTGTAGTCTACACAG-1	CTB	0.504087	Euploid	166.992
lib2_GTTTACTAGTTGGCTT-1	CTB	0.523161	Euploid	148.119
lib2_TAACCAGTCTCAACGA-1	CTB	0.523161	Euploid	132.274
lib2_TAAGCACGTAGGCAAC-1	CTB	0.523161	Euploid	110.948
lib2_TAAGCACGTGTCATCA-1	CTB	0.504087	Euploid	113.463
lib2_TAATCTCCAAACACCT-1	CTB	0.385965	Euploid	98.4922
lib2_TACATTCCAGCGAGTA-1	CTB	0.523161	Euploid	154.13
lib2_TACCCGTTCCAACTGA-1	CTB	0.504087	Euploid	118.839
lib2_TACTTACCACGCTGTG-1	CTB	0.385965	Euploid	172.858
lib2_TAGATCGGTACTCGAT-1	CTB	0.523161	Euploid	173.684
lib2_TATACCTCATTGCCTC-1	CTB	0.523161	Euploid	158.213
lib2_TATCTTGTCCATTGCC-1	CTB	0.523161	Euploid	163.232
lib2_TATTCCAAGAGTGACC-1	CTB	0.523161	Euploid	116.784
[truncated: 1,160 more rows]
