# Supplementary material for: Single-cell Transcriptomics of Postimplantation Embryos: Unveiling Aneuploidy Effects and Lineage Dynamics
Source: Research Square preprint supplement (doi:10.21203/rs.3.rs-4111897/v1), 2024-03-22
Supplement: Supplementary file 6 [file abd54c838faf6e8fd4528711.xlsx]

## Sheet: UMAP
Cell	UMAP_1	UMAP_2
lib230524_AAACCCAGTTCTTGCC-1	-2.69899	-4.42938
lib230524_AAACGAAAGTAGGGTC-1	1.99568	8.81058
lib230524_AAACGAAGTTAATGAG-1	0.0239561	8.01805
lib230524_AAACGAATCCATCTCG-1	1.80734	7.28582
lib230524_AAACGAATCTTGATTC-1	3.45654	8.80768
lib230524_AAAGAACAGCGTACAG-1	-2.35407	10.3753
lib230524_AAAGGGCCACAGCTTA-1	-1.33485	5.23018
lib230524_AAAGGGCCACCTGCAG-1	-4.02376	-2.18605
lib230524_AAAGGGCCAGCTGAAG-1	1.02822	6.89013
lib230524_AAAGGGCCAGTAGTTC-1	-4.10274	-0.458645
lib230524_AAAGGGCGTGAGATCG-1	0.265825	9.95971
lib230524_AAAGGGCGTTAACCTG-1	1.30079	6.69757
lib230524_AAAGTCCGTCTGATCA-1	-4.67533	-4.49331
lib230524_AACAAGACAGGTTACT-1	-0.566617	6.81185
lib230524_AACACACCAGACCGCT-1	0.724457	6.14444
lib230524_AACCAACCAGGTATGG-1	1.18835	6.8491
lib230524_AACCAACGTTGTGGCC-1	-4.36672	-0.997524
lib230524_AACCAACTCCTACTGC-1	0.507594	9.02135
lib230524_AACCATGCAGGGTCTC-1	2.87102	10.1173
lib230524_AACCCAAGTAGATGTA-1	1.18795	6.38138
lib230524_AACCCAATCTACACAG-1	2.91121	9.92132
lib230524_AACCTTTAGAGTCAGC-1	-0.577247	0.956806
lib230524_AACGAAAAGTGAGTTA-1	-3.03445	-2.7051
lib230524_AACGTCAGTCGATGCC-1	-5.37581	-5.3455
lib230524_AACTTCTAGCCGTCGT-1	-4.76885	-1.87556
lib230524_AACTTCTTCACCTCGT-1	-6.1331	-4.0436
lib230524_AAGACAATCCTCCACA-1	-6.38828	-3.85024
lib230524_AAGATAGGTTCCTACC-1	-0.584751	7.20468
lib230524_AAGCCATTCACCATGA-1	-1.55455	5.18473
lib230524_AAGCGTTTCCAACTAG-1	-6.05998	-4.39088
lib230524_AAGGAATGTACGATCT-1	-1.15088	6.73448
lib230524_AAGGTAAAGGGAGAAT-1	-3.83384	-0.553892
lib230524_AAGGTAAGTAACATCC-1	-3.36082	-2.79347
lib230524_AAGGTAAGTCTCTCTG-1	12.0916	-0.485562
lib230524_AAGTACCCAATTGCGT-1	3.16654	10.1457
lib230524_AAGTACCTCCCGTTGT-1	2.81427	6.56838
lib230524_AAGTCGTAGACGCATG-1	8.83797	11.3287
lib230524_AAGTTCGAGCATACTC-1	-4.01579	-4.44697
lib230524_AATAGAGGTAGCTAAA-1	-0.111364	10.0707
lib230524_AATCGACCATACTGAC-1	-2.08622	10.2951
lib230524_AATCGTGTCCACACAA-1	2.95215	8.7444
lib230524_AATGAAGAGAAGGATG-1	-3.71761	-2.72477
lib230524_AATGAAGGTACTAAGA-1	-1.68347	-3.90024
lib230524_AATGACCGTCGCCACA-1	-0.575972	-1.66974
lib230524_AATGGAAAGGTAAGAG-1	-5.56321	-4.61438
lib230524_AATGGAAAGGTTACCT-1	2.919	9.08077
lib230524_AATGGAACAACTTGCA-1	1.17814	8.51429
lib230524_AATGGCTTCCGTGGCA-1	-0.518357	9.35375
lib230524_AATTCCTAGACATATG-1	0.0055392	9.06292
lib230524_ACAAGCTAGCCAAGTG-1	-4.57007	-3.78126
lib230524_ACACGCGTCTTTCCAA-1	-1.36749	-2.41685
lib230524_ACAGCCGGTAGGTTTC-1	2.97288	-0.505126
lib230524_ACAGCCGGTCAAAGAT-1	1.01148	-2.35392
lib230524_ACAGCCGTCGGATTAC-1	-3.28037	-0.489061
lib230524_ACATCCCAGTTCAACC-1	12.0233	-0.775296
lib230524_ACATCCCCACCGGAAA-1	3.0784	6.47881
lib230524_ACATTTCGTCAACCTA-1	-5.73552	-2.90824
lib230524_ACCAAACCAACCAACT-1	-0.689701	6.28284
lib230524_ACCAAACTCTCAACCC-1	-5.67462	-4.18526
lib230524_ACCATTTAGAAACTGT-1	2.19332	-0.0547092
lib230524_ACCATTTCATGGGAAC-1	1.18516	5.93552
lib230524_ACCCAAACAACGGTAG-1	0.847765	6.64931
lib230524_ACCCTCACAGCGACCT-1	1.10532	8.99335
lib230524_ACCCTCATCGCGTAGC-1	-0.743973	6.95431
lib230524_ACCTGAACAAGTTGGG-1	-5.10739	-5.05964
lib230524_ACGGTCGTCGAAACAA-1	1.80126	9.34671
lib230524_ACGGTTAGTGAATATG-1	3.45215	9.97208
lib230524_ACGTAACGTTGAATCC-1	0.815725	7.99356
lib230524_ACGTAACTCATTCGGA-1	-5.59571	-5.2056
lib230524_ACGTAACTCGCGCTGA-1	-2.3787	10.5676
lib230524_ACGTACAAGGCACTAG-1	-3.27371	-3.45474
lib230524_ACGTACACAGTCTCTC-1	0.845487	8.43917
lib230524_ACGTACAGTTCCAGGC-1	-4.84848	-1.05682
lib230524_ACGTTCCGTATGGTTC-1	3.35689	-1.20867
lib230524_ACGTTCCTCATTGTTC-1	-6.19577	-3.10986
lib230524_ACTACGACAATTTCCT-1	-3.64794	-3.5163
lib230524_ACTACGACACTACAGT-1	-5.51547	-2.26903
lib230524_ACTATGGCAGAAGCTG-1	-5.07482	-3.07933
lib230524_ACTATTCCACTCCACT-1	12.603	-0.711246
lib230524_ACTATTCGTGGGATTG-1	-0.0676181	9.45218
lib230524_ACTATTCGTTATAGCC-1	12.0143	-2.27857
lib230524_ACTATTCTCTGGCTGG-1	3.45018	10.2315
lib230524_ACTGATGCACGTTGGC-1	-1.58594	12.4745
lib230524_ACTGCAACATCTATCT-1	4.94228	-16.3965
lib230524_ACTGTGAAGTTGGACG-1	2.00208	9.93493
lib230524_ACTTAGGCATCTCAAG-1	3.51017	8.67816
lib230524_ACTTAGGGTAGATCCT-1	8.62001	11.4117
lib230524_ACTTAGGGTTCTAAGC-1	2.25079	9.35539
lib230524_ACTTCCGAGCGACTGA-1	-3.40592	-0.511224
lib230524_ACTTCGCAGCCTCTTC-1	3.49561	9.81834
lib230524_ACTTCGCGTGTTCATG-1	2.13194	8.94452
lib230524_ACTTTCACAATTGCTG-1	-5.33318	-2.56759
lib230524_ACTTTGTAGAAAGCGA-1	0.795859	8.4241
lib230524_AGAAATGAGCTGACAG-1	1.94586	7.64634
lib230524_AGAAATGCAGCTGTGC-1	0.72782	6.18953
lib230524_AGAAATGGTGGAGAAA-1	-2.67075	0.12355
lib230524_AGAACAAAGACGAAGA-1	-4.1727	-4.04082
lib230524_AGAACAACATTGTAGC-1	2.31665	9.02446
lib230524_AGAACAAGTGTACAGG-1	-2.33766	10.7644
lib230524_AGAAGCGCACCGTCGA-1	-3.65616	-2.35159
lib230524_AGACAAATCTTCCAGC-1	3.32837	-0.746189
lib230524_AGACTCAAGAAGGGAT-1	-3.72478	-3.02364
lib230524_AGACTCACATCTTCGC-1	0.945974	0.127085
lib230524_AGAGAATGTTCTCTAT-1	-1.47223	7.90224
lib230524_AGAGCAGCAGGTTTAC-1	-3.15706	-0.133238
lib230524_AGAGCCCAGCTACTAC-1	1.06173	8.69037
lib230524_AGAGCCCCACATGGTT-1	-4.62583	-3.44419
lib230524_AGATAGAAGACCATAA-1	-1.16425	9.35396
lib230524_AGATAGAAGCACTAAA-1	-0.0814326	9.53943
lib230524_AGATAGAGTGTCATTG-1	-0.544272	6.10348
lib230524_AGATGAACAACTACGT-1	1.82971	7.49182
lib230524_AGCCAATAGGTAGGCT-1	2.90563	9.86379
lib230524_AGCCACGAGGATACGC-1	-4.53062	-2.33994
lib230524_AGCCACGTCAGGACGA-1	-2.27411	11.4945
lib230524_AGCGCTGTCTACCTTA-1	-6.04122	-3.74901
lib230524_AGCTACAGTAGCTGAG-1	-1.66098	7.88477
lib230524_AGCTACAGTGATTCTG-1	-4.9982	-5.95698
lib230524_AGCTCAACAAGTGGAC-1	2.76893	-0.667882
lib230524_AGCTTCCCACATACGT-1	-1.07992	-0.860581
lib230524_AGGAAATCACCGTACG-1	0.930156	6.69149
lib230524_AGGACTTGTCTGTGAT-1	-5.39634	-2.12267
lib230524_AGGACTTTCAATCTTC-1	2.58164	6.7933
lib230524_AGGAGGTGTATACCTG-1	1.47062	-1.42924
lib230524_AGGAGGTGTCTAGATC-1	2.64208	-0.251548
lib230524_AGGAGGTTCGTGAGAG-1	-4.51794	-2.78207
lib230524_AGGATAAGTCTAACGT-1	1.81429	9.09829
lib230524_AGGATCTGTATGAGAT-1	1.81679	-1.23068
lib230524_AGGCATTGTCCGTTTC-1	-0.326309	6.02585
lib230524_AGGCATTTCACTACGA-1	-0.899574	5.33781
lib230524_AGGCATTTCGGCATCG-1	2.69646	9.7842
lib230524_AGGCCACGTTGGAGAC-1	-1.08437	8.10365
lib230524_AGGCCACTCTGCGTCT-1	2.32351	8.53557
lib230524_AGGCTGCCACTGGCCA-1	-4.35441	-3.09409
lib230524_AGGCTGCGTTGGCCTG-1	-1.55386	8.65547
lib230524_AGGGAGTAGCCGTTAT-1	-4.81566	-0.683962
lib230524_AGGGCCTAGTAGCTCT-1	8.91705	10.8624
lib230524_AGGGTCCGTAGGAGTC-1	1.59719	8.87415
lib230524_AGGGTTTCATCTCGTC-1	-0.81867	7.59883
lib230524_AGGGTTTGTATGGTTC-1	-1.04888	5.38915
lib230524_AGGTCATAGCTTCTAG-1	2.43904	-0.196589
lib230524_AGGTCATAGGTTCACT-1	0.176737	9.58731
lib230524_AGGTCTAAGGGCTAAC-1	-3.19323	-3.65628
lib230524_AGGTGTTGTTCGGACC-1	-2.778	-0.833611
lib230524_AGGTGTTTCGTTCTGC-1	1.94318	7.10253
lib230524_AGGTTACTCCGCAGTG-1	12.112	-1.88283
lib230524_AGTACCAAGAGGTTAT-1	-2.8964	-1.15351
lib230524_AGTACCAAGGTGCCAA-1	3.60017	9.6276
lib230524_AGTACCACACTGTTCC-1	-1.28355	11.6147
lib230524_AGTACCACATAGGAGC-1	-0.802375	6.72599
lib230524_AGTACTGTCGGAGTGA-1	-2.25873	-3.61155
lib230524_AGTAGCTTCTCATAGG-1	0.943736	6.45686
lib230524_AGTAGCTTCTGAACGT-1	2.0845	7.11078
lib230524_AGTAGTCCATATACCG-1	-0.0534646	8.08922
lib230524_AGTCAACAGCCGGAAT-1	12.4346	-1.46297
lib230524_AGTCACACAAGCTGCC-1	2.4938	10.2154
lib230524_AGTCTCCGTAATGATG-1	-3.19626	0.0275553
lib230524_AGTCTCCGTCACTCTC-1	3.4498	9.6726
lib230524_AGTCTCCTCGGATACT-1	2.96837	10.0477
lib230524_AGTGACTTCTGAATCG-1	12.22	-2.26199
lib230524_AGTGTTGCACAAAGTA-1	2.27071	-3.26808
lib230524_AGTTAGCCAATTTCTC-1	-3.2972	-2.66899
lib230524_ATACCTTAGTTACGGG-1	0.616824	6.88964
lib230524_ATACTTCTCTCGTCAC-1	-2.38488	7.82236
lib230524_ATCACTTTCCTTACCG-1	-2.55468	-5.30988
lib230524_ATCAGGTAGATGCTTC-1	-4.97661	-0.876493
lib230524_ATCAGGTGTTTGGAGG-1	-5.22126	-5.16272
lib230524_ATCATTCCAACGCATT-1	-0.332187	6.81144
lib230524_ATCATTCGTTGCCGAC-1	-2.35137	7.63196
lib230524_ATCCACCCATGTAACC-1	0.36723	6.6806
lib230524_ATCCACCTCCATTTGT-1	2.55293	-0.00599517
lib230524_ATCCATTTCGTGGGTC-1	-2.3474	7.87485
lib230524_ATCCATTTCTCCGCAT-1	3.26061	8.94684
lib230524_ATCCCTGAGCCTCTCT-1	3.37364	8.3022
lib230524_ATCCCTGAGCGTGTCC-1	-1.71779	5.35374
lib230524_ATCCCTGCACACAGCC-1	0.679067	7.28211
lib230524_ATCCCTGTCAAATGCC-1	-0.174954	6.22965
lib230524_ATCCCTGTCCGTGTAA-1	-0.532441	0.783598
lib230524_ATCCTATCAGAACTTC-1	2.77032	10.0171
lib230524_ATCCTATCAGCAAGAC-1	-2.13228	-3.52446
lib230524_ATCCTATCATAGAGGC-1	3.07828	6.457
lib230524_ATCGCCTAGTCGCGAA-1	2.81579	9.50647
lib230524_ATCGCCTTCTCGTTTA-1	-2.39201	11.3313
lib230524_ATCGGATCAAATTGGA-1	-5.14254	-4.69192
lib230524_ATCGGATGTGGACTAG-1	0.59113	-3.03603
lib230524_ATCGGATTCCACGTAA-1	-3.5416	-3.63488
lib230524_ATCGTAGAGCTTTGTG-1	2.37942	7.52002
lib230524_ATCGTCCCACATATGC-1	-1.00751	8.5644
lib230524_ATCTCTAAGCCTCACG-1	3.5027	10.0166
lib230524_ATCTCTAGTGAATGTA-1	2.29605	8.92953
lib230524_ATCTCTATCTTGGAAC-1	0.85022	9.84978
lib230524_ATGACCACACTCGATA-1	8.93271	11.3308
lib230524_ATGCCTCTCAGCTCTC-1	3.34876	8.86499
lib230524_ATGCGATCATGGGTCC-1	2.47022	-0.202848
lib230524_ATGGATCAGGTTATAG-1	-4.29471	-1.43646
lib230524_ATGGATCGTTCGGCTG-1	-0.934913	6.29518
lib230524_ATGGGTTTCACCGGTG-1	-4.40986	-0.736323
lib230524_ATGTCCCCAGCTTTCC-1	-2.19012	7.67251
lib230524_ATGTCTTCACCTATCC-1	-3.79609	-4.21501
lib230524_ATGTCTTTCAGCTTGA-1	-4.10266	-1.49285
lib230524_ATGTCTTTCTGTAAGC-1	2.65893	9.28013
lib230524_ATTACCTGTTGTGTAC-1	0.551019	6.18077
lib230524_ATTACTCTCTGCGAGC-1	0.0612838	8.04416
lib230524_ATTATCCTCTGGAGAG-1	2.86052	9.37999
lib230524_ATTCACTCACGGGTAA-1	3.10892	9.17995
lib230524_ATTCAGGCATTCTGTT-1	0.18586	-3.23178
lib230524_ATTCCATTCCGTTTCG-1	-3.9757	-4.68118
lib230524_ATTCCCGTCCTAGAGT-1	-0.773615	-1.92463
lib230524_ATTGGGTAGCATCGAG-1	-5.25049	-5.79195
lib230524_ATTGGGTTCTAATTCC-1	-5.43214	-4.24554
lib230524_ATTGTTCCACCGTGCA-1	-2.64377	11.4827
lib230524_CAAAGAAAGGAATGTT-1	-0.783185	6.91688
lib230524_CAACAACCAGGTATGG-1	-5.34716	-5.42974
lib230524_CAACAACTCTTCGTAT-1	3.26045	9.88055
lib230524_CAACCTCTCCCATTCG-1	-4.38483	-4.12223
lib230524_CAACGATAGCACACAG-1	-2.60266	10.5819
lib230524_CAACGATAGTAACCTC-1	-4.92007	-2.5691
lib230524_CAAGGGAAGGACTAAT-1	9.00627	11.1919
lib230524_CAATCGAGTAGGACTG-1	-0.367052	-1.56517
lib230524_CAATGACTCATGCGGC-1	2.95744	9.26033
lib230524_CAATTTCTCTGACAGT-1	-6.1282	-5.30685
lib230524_CACATGAGTGTGGTCC-1	-13.7269	3.09945
lib230524_CACCGTTAGGTGCCAA-1	-2.30836	11.018
lib230524_CACGAATGTTGGGTAG-1	3.13951	8.86483
lib230524_CACGAATTCTGCGATA-1	-4.27259	-1.70004
lib230524_CACGTGGAGAAATCCA-1	0.493291	9.98841
lib230524_CACGTGGCAGGCTCTG-1	3.10458	8.43422
lib230524_CACGTGGTCTGTCGCT-1	-3.14575	-0.478038
lib230524_CACGTTCAGCCAAGTG-1	0.575061	3.00697
lib230524_CACTGGGGTCCACTTC-1	-4.63058	-0.799898
lib230524_CACTTCGAGCCGCACT-1	-3.17075	-5.80723
lib230524_CAGAGCCCAGTCCCGA-1	-0.408357	5.78835
lib230524_CAGAGCCTCGAACACT-1	0.633075	-2.2213
lib230524_CAGATTGCACTGTCCT-1	-2.09641	8.64372
lib230524_CAGATTGTCACCTCAC-1	-4.11549	-0.997041
lib230524_CAGCAATAGATTGATG-1	-6.40062	-5.01765
lib230524_CAGCCAGCATGACTGT-1	2.08621	9.09804
lib230524_CAGCGTGCATACGCAT-1	1.23386	7.54052
lib230524_CAGGCCATCCTATTTG-1	8.33158	10.6141
lib230524_CAGGGCTAGGACTAAT-1	-6.08133	-4.909
lib230524_CAGGGCTCACAGCCAC-1	3.45892	9.22577
lib230524_CAGTGCGTCAGTGGGA-1	0.0372639	9.83137
lib230524_CATAAGCAGGTTGGAC-1	3.10257	8.85751
lib230524_CATACAGCACCCAATA-1	1.73782	-1.41865
lib230524_CATACCCGTCATCGGC-1	11.8108	-2.12155
lib230524_CATACCCTCTCCGAGG-1	-4.07289	-2.66084
lib230524_CATAGACGTCCCACGA-1	12.8894	-1.09929
lib230524_CATCAAGCAACCAGAG-1	3.35166	9.21206
lib230524_CATCAAGCATGTGGTT-1	-1.23014	5.1377
lib230524_CATCCACCATCATCTT-1	-5.01171	-3.68184
lib230524_CATCCACGTGAGGATC-1	-1.27333	7.95047
lib230524_CATCCACTCCTTGGAA-1	-5.42621	-5.97846
lib230524_CATCCGTGTCGTACAT-1	3.45086	5.87571
lib230524_CATCCGTTCTCGGTCT-1	-2.5339	10.5512
lib230524_CATCGCTTCATTTGTC-1	-2.22322	11.6154
lib230524_CATCGTCGTCTGGTTA-1	-5.2778	-4.52571
lib230524_CATCGTCTCTGATTCT-1	0.149029	9.62298
lib230524_CATGCGGAGAGCAGTC-1	2.36951	8.96204
lib230524_CATGCTCCACAACGAG-1	-6.05883	-3.94035
lib230524_CATGCTCCAGGTTTAC-1	3.04053	6.1576
lib230524_CATGCTCCATGCACTA-1	3.43143	6.12405
lib230524_CATTCATCATGACTTG-1	3.01058	8.57927
lib230524_CATTCATTCACCGGGT-1	-2.53967	11.2101
lib230524_CATTCCGAGCGCCCAT-1	1.01037	8.7883
lib230524_CATTCCGCAATTTCTC-1	8.6539	11.1809
lib230524_CATTCCGTCGCAGTTA-1	-0.192813	6.55789
lib230524_CATTGAGCAATTCTCT-1	1.64896	3.70721
lib230524_CATTGAGGTCCAGCAC-1	-5.15055	-5.79425
lib230524_CATTGAGTCATTGCCC-1	1.00159	6.25832
lib230524_CATTGCCAGACTGGGT-1	8.68084	11.2217
lib230524_CATTGCCTCTAGACCA-1	-1.40879	7.54328
lib230524_CATTTCACACTGGCGT-1	2.77037	0.147856
lib230524_CCAATTTTCAGCCCAG-1	2.84388	-0.540364
lib230524_CCAATTTTCAGTGTTG-1	-4.46525	-0.817676
lib230524_CCACAAATCTAGTTCT-1	-1.61822	8.39259
lib230524_CCACCATTCCACTGGG-1	-2.90737	-0.105313
lib230524_CCACGTTGTCGCGGTT-1	-0.638103	0.766334
lib230524_CCACGTTGTGCACAAG-1	1.90668	8.94285
lib230524_CCACTTGAGTATCCTG-1	-4.16286	-1.39269
lib230524_CCATAAGCATTCAGCA-1	2.77945	9.61935
lib230524_CCATCACGTCTGTGAT-1	-5.9823	-3.53041
lib230524_CCCATTGAGTGCCAGA-1	-5.07302	-1.58355
lib230524_CCCGAAGAGTCACTAC-1	2.55253	8.90812
lib230524_CCCGAAGCATAACTCG-1	-1.68261	12.3601
lib230524_CCCGAAGTCATCAGTG-1	1.89459	-2.80711
lib230524_CCCGGAAGTCATTGCA-1	0.249673	-4.44138
lib230524_CCCTAACGTGCTCTTC-1	-4.91068	-4.85916
lib230524_CCCTAACGTTTGGCTA-1	-1.78406	12.1999
lib230524_CCCTCTCAGCAGTACG-1	-1.60309	-0.55383
lib230524_CCCTCTCAGCATCGAG-1	1.69253	-1.6039
lib230524_CCCTCTCAGCCGTTAT-1	0.886569	9.90452
lib230524_CCCTCTCCAAGTTTGC-1	-1.6556	7.54467
lib230524_CCCTCTCGTACGCGTC-1	2.69507	0.329686
lib230524_CCCTCTCTCGAGATAA-1	-3.63191	-3.12513
lib230524_CCCTGATAGACAGCGT-1	3.12106	8.48353
lib230524_CCCTGATCAACAGATA-1	1.58412	6.91478
lib230524_CCCTGATCATACCACA-1	-0.468813	6.12341
lib230524_CCGATGGCAAATCAGA-1	0.118354	6.20812
lib230524_CCGATGGTCCGATAGT-1	-5.00613	-5.38783
lib230524_CCGCAAGGTATGCTAC-1	-1.3986	7.7116
lib230524_CCGGTAGTCTGGAGAG-1	2.59794	9.13066
lib230524_CCGTAGGCAGAGAGGG-1	1.70883	9.11411
lib230524_CCGTTCAGTAGACAGC-1	1.72476	6.77517
lib230524_CCTAACCGTGAATAAC-1	0.504771	9.0943
lib230524_CCTAAGACAGAGTCTT-1	8.88286	11.3881
lib230524_CCTACGTTCGCCTATC-1	3.73375	5.94391
lib230524_CCTATCGCACTGAGGA-1	3.50383	-1.01225
lib230524_CCTATCGCAGGTGAGT-1	-5.75106	-3.71283
lib230524_CCTCAACAGCTCAGAG-1	1.10972	8.37707
lib230524_CCTCCAAGTGCCCAGT-1	-1.6112	7.81091
lib230524_CCTCCAATCTGTAACG-1	3.56936	8.57843
lib230524_CCTCCTCCAAATGATG-1	1.43554	-3.07321
lib230524_CCTCTCCGTCCTATAG-1	-1.74612	-4.12283
lib230524_CCTGCATCAAGTCATC-1	-1.69879	7.45547
lib230524_CCTGCATCACACTGGC-1	-0.235626	-2.16563
lib230524_CCTGTTGCATGTGACT-1	-4.67349	-1.10407
lib230524_CCTTGTGCATTGTAGC-1	-5.70981	-3.18493
lib230524_CCTTGTGGTGTGAGCA-1	-1.02105	6.72585
lib230524_CGAAGGAAGCTAATGA-1	-4.03127	-3.20458
lib230524_CGAAGGAAGGCTGGAT-1	1.02323	6.34982
lib230524_CGAAGGATCCCTGGTT-1	1.05765	4.95142
lib230524_CGAAGTTCATTCGATG-1	-4.49117	-0.839334
lib230524_CGAGAAGGTTTATGCG-1	-3.36342	-5.05669
lib230524_CGAGTTACATCAACCA-1	2.51971	9.76923
lib230524_CGAGTTACATGTGGTT-1	-4.64862	-4.79459
lib230524_CGAGTTAGTCGGTGAA-1	1.34625	6.71161
lib230524_CGATCGGAGCACCGTC-1	8.34145	10.6357
lib230524_CGATCGGCAGCTTTGA-1	2.36909	0.0252281
lib230524_CGATCGGGTAGGCTGA-1	-0.173662	9.66212
lib230524_CGCAGGTAGACGGAAA-1	-0.360478	6.00346
lib230524_CGCATAAAGTGTTCCA-1	-2.46593	-0.0655906
lib230524_CGCCAGACATGAGGGT-1	3.23824	6.4007
lib230524_CGCCAGATCACTCTTA-1	1.26393	5.21436
lib230524_CGGAATTCAAACGGCA-1	2.62452	9.16221
lib230524_CGGACACAGGTATCTC-1	-0.599617	6.97443
lib230524_CGGCAGTTCCCAAGCG-1	1.77993	7.35168
lib230524_CGGGCATAGCCTTTGA-1	-1.7194	-2.04576
lib230524_CGGGCATCACTAGAGG-1	-5.79555	-4.83121
lib230524_CGGGCATGTAGTGCGA-1	-4.25594	-5.81134
lib230524_CGGGCATTCTGGTCAA-1	2.06251	8.85466
lib230524_CGTAATGCAATAGTGA-1	-2.63828	0.549397
lib230524_CGTAATGTCTAACACG-1	3.02792	10.3045
lib230524_CGTAATGTCTTGTGCC-1	-2.43546	-2.92884
lib230524_CGTAGTATCAATCTTC-1	1.24856	6.19484
lib230524_CGTAGTATCACTACGA-1	-0.00815795	6.84591
lib230524_CGTGATAAGTGGACTG-1	-0.0554316	7.00516
lib230524_CGTGATAGTCGCGTTG-1	-3.25198	-4.05616
lib230524_CGTTAGAAGAGAGCAA-1	2.36889	8.21702
lib230524_CGTTCTGCATGGCACC-1	-4.62285	-2.17334
lib230524_CGTTGGGAGGTATAGT-1	3.2035	8.77096
lib230524_CGTTGGGGTTCTCACC-1	-1.06788	7.29913
lib230524_CTAACCCCAATTTCTC-1	12.4501	-2.01179
lib230524_CTAACCCCATGACTGT-1	-2.06675	1.22469
lib230524_CTAACTTCAGGTTTAC-1	-3.02302	-0.693929
lib230524_CTAACTTGTAGCCCTG-1	-3.92643	-0.696614
lib230524_CTAACTTGTGGGCTTC-1	-0.0193136	7.39015
lib230524_CTAAGTGAGAAATGGG-1	-2.93064	-0.330481
lib230524_CTAAGTGGTTAAGCAA-1	-1.09016	8.10033
lib230524_CTACATTAGATGTTGA-1	8.86902	11.4247
lib230524_CTAGACAGTGCCTATA-1	-3.34811	-6.04465
lib230524_CTAGGTAGTATGGTTC-1	2.88787	8.82603
lib230524_CTATAGGAGTTACGTC-1	-1.45223	-1.16911
lib230524_CTATAGGTCTATCGCC-1	2.97142	6.4442
lib230524_CTATCCGAGCCATTGT-1	0.514697	8.50877
lib230524_CTATCCGAGGTCGTCC-1	4.78627	-16.3427
lib230524_CTATCTAAGTCATGGG-1	2.18027	8.05925
lib230524_CTATCTAGTGGATTTC-1	2.17608	7.5433
lib230524_CTCAACCAGTTCTCTT-1	1.83329	6.36288
lib230524_CTCAACCTCATTGAGC-1	2.01212	6.97341
lib230524_CTCAAGACAAGCCTGC-1	-2.46404	-4.19544
lib230524_CTCAAGACAATGCAGG-1	2.40087	9.29488
lib230524_CTCAATTCAAAGACTA-1	2.94859	6.63579
lib230524_CTCACTGAGGAGAGGC-1	-2.06824	-3.04448
lib230524_CTCACTGGTGGCTGAA-1	-4.91946	-3.97124
lib230524_CTCAGAAAGGAATCGC-1	1.48112	7.35466
lib230524_CTCAGAACAGATACTC-1	-0.917215	-4.02158
lib230524_CTCAGAACATCAACCA-1	-0.176496	-1.20852
lib230524_CTCAGTCAGGTCCGAA-1	12.5357	-0.315986
lib230524_CTCATCGAGGCTTAGG-1	-1.84617	-3.49824
lib230524_CTCATGCTCCAGCACG-1	2.95914	6.5961
lib230524_CTCATTACAGCGTTTA-1	-1.94237	7.86311
lib230524_CTCATTATCCGCAGTG-1	-0.780843	6.58871
lib230524_CTCCAACTCGTGAGAG-1	-1.02434	-2.91654
lib230524_CTCCACAGTAAGATCA-1	1.18043	-0.0605447
lib230524_CTCCCTCAGCGATCGA-1	-1.519	5.86321
lib230524_CTCCCTCAGTTAGTAG-1	-1.71476	12.4272
lib230524_CTCCGATAGAAGTCCG-1	0.215552	6.19566
lib230524_CTCCTTTAGATCCTAC-1	2.64316	8.86836
lib230524_CTCCTTTAGTCATCGT-1	-0.922475	7.3554
lib230524_CTCTCAGGTCAACACT-1	2.04687	-3.3923
lib230524_CTCTCAGTCCAAGCAT-1	-0.752864	-4.17503
lib230524_CTCTCAGTCGACATCA-1	2.12509	-1.24664
lib230524_CTCTCGACAAAGGATT-1	2.99689	9.75153
lib230524_CTCTCGAGTATTTCGG-1	2.83541	-1.65283
lib230524_CTCTGGTTCATTCATC-1	2.98905	6.61146
lib230524_CTCTGGTTCCGAGATT-1	-1.83091	7.94338
lib230524_CTGAATGTCGACGAGA-1	1.7134	6.4317
lib230524_CTGAATGTCTACTTCA-1	2.9075	6.92085
lib230524_CTGAGCGAGAGTGTTA-1	1.92746	8.13716
lib230524_CTGCAGGTCGCGCTGA-1	-1.55846	12.429
lib230524_CTGCAGGTCTAGCCAA-1	3.22448	8.96136
lib230524_CTGCATCAGGGTCTTT-1	-1.6951	7.7389
lib230524_CTGCATCCAGAACTAA-1	-5.3607	-3.69316
lib230524_CTGCCTATCACGTAGT-1	-0.891804	5.89406
lib230524_CTGCGAGGTGCTGATT-1	1.22366	6.705
lib230524_CTGCTCACAGCTCTGG-1	-3.24267	-0.0936777
lib230524_CTGGCAGCAACCGCTG-1	2.57645	6.44107
lib230524_CTGGTCTAGTGATTCC-1	-2.29547	11.4635
lib230524_CTGGTCTTCAAGAGTA-1	-4.14798	-5.98693
lib230524_CTGGTCTTCGGCGATC-1	-6.24594	-3.70732
lib230524_CTGGTCTTCTACTATC-1	9.30586	11.2098
lib230524_CTGTACCAGACTTAAG-1	-0.300989	8.02286
lib230524_CTGTAGACACTGATTG-1	-5.06881	-5.12477
lib230524_CTGTGAAAGCCTCTCT-1	-0.446493	0.969742
lib230524_CTGTGAACAGGCCTGT-1	4.6561	-16.2164
lib230524_CTGTGAAGTAGTGCGA-1	-0.474264	-1.4414
lib230524_CTTACCGAGATACATG-1	12.4802	-0.2697
lib230524_CTTCAATCAACACTAC-1	0.435227	10.0856
lib230524_CTTCAATGTCGCTTAA-1	12.5035	-0.26941
lib230524_CTTCAATGTCTGTGAT-1	-1.58931	5.16384
lib230524_CTTCCGAAGTTGCCTA-1	-1.47408	5.18176
lib230524_CTTCCGAGTTCTCCAC-1	-1.42266	-3.32396
lib230524_CTTCCTTGTCCCAAAT-1	3.03755	9.12127
lib230524_CTTCGGTGTGTTAGCT-1	2.62913	8.23072
lib230524_CTTCTCTGTTTATGCG-1	-5.20134	-2.74709
lib230524_CTTCTCTTCACGACTA-1	-1.03842	7.64558
lib230524_CTTGATTAGCCTCTGG-1	-2.57846	-3.90109
lib230524_CTTGATTGTTAGAAGT-1	1.78551	-1.13994
lib230524_CTTTCAAAGTAACCTC-1	2.8008	7.0276
lib230524_GAAGAATAGAGGTCGT-1	-4.63615	-4.61505
lib230524_GAAGAATTCCAAATGC-1	-5.02451	-1.59775
lib230524_GAAGAATTCCCTATTA-1	-0.492046	7.97704
lib230524_GAAGAATTCTCGTCGT-1	2.59635	7.60988
lib230524_GAAGCCCGTCGCTTGG-1	-2.83095	-0.458529
lib230524_GAAGCGAGTAGCTCGC-1	0.116414	7.13381
lib230524_GAAGGGTAGCCGTTAT-1	0.294564	6.57155
lib230524_GAAGGGTTCCGGGACT-1	2.58898	8.94585
lib230524_GAAGTAACACCTATCC-1	-2.69766	-2.58511
lib230524_GAAGTAAGTAGTACGG-1	1.25216	8.56129
lib230524_GAATCGTGTGTCCTAA-1	2.18187	7.57046
lib230524_GACACGCCACTCCTGT-1	2.42517	-2.03819
lib230524_GACATCAGTAGCTCGC-1	-1.10593	8.89124
lib230524_GACCCAGCATCAACCA-1	-1.84754	7.96874
lib230524_GACCCAGTCGTGGGTC-1	1.54547	6.66648
lib230524_GACCCTTTCAGCTTGA-1	1.60584	9.74179
lib230524_GACCGTGGTCAGACGA-1	1.50648	6.90461
lib230524_GACCGTGGTTTGATCG-1	-6.41643	-5.0813
lib230524_GACCTTCAGTTGCTCA-1	-2.95386	-1.16229
lib230524_GACCTTCCAAGTGTCT-1	-1.29098	-0.614723
lib230524_GACGCTGAGAGTCCGA-1	-0.122211	6.08523
lib230524_GACGCTGGTCGGTACC-1	-3.61767	-1.03137
lib230524_GACTCAAAGAGCCCAA-1	1.85199	9.70416
lib230524_GACTCAAGTATGCGTT-1	0.827857	6.9928
lib230524_GACTCAAGTCCAACGC-1	-5.11252	-3.57251
lib230524_GACTCAAGTGCCGTAC-1	-1.44021	7.8406
lib230524_GACTCAATCAAGAGTA-1	2.46997	0.269805
lib230524_GACTCTCAGGGATCTG-1	2.87491	8.88212
lib230524_GACTGATAGCGATGGT-1	2.12767	6.63119
lib230524_GACTGATCACAAGCCC-1	2.08235	-0.36605
lib230524_GACTTCCCAGACAAAT-1	-2.17603	-6.26653
lib230524_GAGAAATCAGGTTACT-1	-4.0196	-2.47427
lib230524_GAGACCCGTACCCGAC-1	0.577032	6.7969
lib230524_GAGACTTAGTGCACTT-1	-4.99894	-2.53993
lib230524_GAGACTTCAATTTCGG-1	2.68321	8.94302
lib230524_GAGACTTCACCAGTTA-1	4.28722	-16.2143
lib230524_GAGAGGTAGCGTTCAT-1	-5.49492	-4.78542
lib230524_GAGAGGTAGTGTAGAT-1	-0.430865	5.75493
lib230524_GAGATGGCACTTGAGT-1	12.6083	-0.833143
lib230524_GAGCCTGTCCTGTACC-1	12.2501	-2.40674
lib230524_GAGGCCTAGACCAGAC-1	-1.89587	8.28909
lib230524_GAGGGATTCCACAGCG-1	2.95575	8.85807
lib230524_GAGGGTAGTCTTGCTC-1	-4.68293	-2.12561
lib230524_GAGTCATGTACTTGTG-1	0.965674	7.17087
lib230524_GAGTCTAAGTGACACG-1	0.191721	10.1619
lib230524_GAGTCTACATCACAGT-1	-0.97874	7.28511
lib230524_GAGTGAGTCGACGCTG-1	5.00482	5.92176
lib230524_GAGTGTTGTAACATCC-1	-4.69	-1.85645
lib230524_GAGTTTGGTTTGAACC-1	-5.67214	-3.95664
lib230524_GATAGAATCTTCGTGC-1	-5.79697	-2.77023
lib230524_GATCAGTGTGGTCTTA-1	1.39943	6.33775
lib230524_GATCATGAGCGTCAAG-1	-4.6493	-0.806916
lib230524_GATCCCTCACTGCGTG-1	2.52763	-2.0242
lib230524_GATGACTCAATCCAGT-1	-0.154772	5.59118
lib230524_GATGACTGTAATGTGA-1	-1.53683	5.27994
lib230524_GATGACTGTCTTTATC-1	-0.284844	9.93877
lib230524_GATGATCAGGAGTCTG-1	-3.91374	-5.31105
lib230524_GATGCTAAGCTGGCTC-1	-4.54992	-1.71552
lib230524_GATGCTACAGTTACCA-1	-1.14452	7.54832
lib230524_GATGGAGAGGCATGGT-1	-0.703002	6.99137
lib230524_GATGGAGCAGGATGAC-1	-4.40899	-0.317514
lib230524_GATGTTGCAAGCTACT-1	-1.10245	5.75706
lib230524_GATGTTGCACCGTGAC-1	9.02225	11.4136
lib230524_GATTTCTAGCCAAGGT-1	12.1859	-2.24649
lib230524_GATTTCTAGCGCCTAC-1	2.96266	-0.416437
lib230524_GATTTCTGTAGACGTG-1	-1.75743	12.2111
lib230524_GATTTCTGTATCGTTG-1	-0.491705	9.26679
lib230524_GCAACATGTCTTGAGT-1	-3.93238	-1.29016
lib230524_GCAACATGTTAGAGAT-1	1.18676	-2.88785
lib230524_GCAACATTCACTAGCA-1	-0.721357	0.89365
lib230524_GCAACCGCACCAGACC-1	2.68451	6.55863
lib230524_GCACATATCGTCGGGT-1	-4.01756	-3.219
lib230524_GCACGTGAGGCTTCCG-1	-2.08246	7.36576
lib230524_GCACGTGCAATCGCAT-1	2.19458	-1.77772
lib230524_GCAGCCACATCAACCA-1	-3.33484	-5.18799
lib230524_GCAGGCTTCGAGATGG-1	-5.25527	-1.54187
lib230524_GCAGTTATCCGATCGG-1	2.85458	-1.7408
lib230524_GCATCGGCACCAGTAT-1	-4.53336	-0.98539
lib230524_GCATGATAGGGCAGAG-1	9.86717	9.37943
lib230524_GCATTAGGTTAGCGGA-1	-4.13601	-0.124725
lib230524_GCCAGCATCACGTCCT-1	-1.94998	12.1737
lib230524_GCCAGGTAGTAAACGT-1	1.22733	7.91515
lib230524_GCCAGTGAGCCGATAG-1	1.09982	6.03332
lib230524_GCCAGTGTCCTTCACG-1	1.5501	7.00245
lib230524_GCCAGTGTCTACGGTA-1	1.6106	7.92034
lib230524_GCCATGGAGCCTGAGA-1	-0.447254	-1.52269
lib230524_GCCATTCCAAATGAAC-1	8.44419	10.4138
lib230524_GCCCAGACACCGAATT-1	0.304652	6.77026
lib230524_GCCCGAAAGACGCTCC-1	0.163456	9.76993
lib230524_GCCCGAACAATTGCAC-1	-2.39626	10.6403
lib230524_GCGAGAAAGCCAAGGT-1	3.48783	8.53429
lib230524_GCGGATCGTTCGATTG-1	-0.579265	5.54418
lib230524_GCGTGCATCCCAAGCG-1	12.4816	-0.576821
lib230524_GCTACAAAGACGTCCC-1	2.15518	7.91322
lib230524_GCTACCTCAGCAGATG-1	-1.25179	5.18979
lib230524_GCTACCTGTATTCTCT-1	1.05085	6.75145
lib230524_GCTCAAACAATGACCT-1	-1.71212	12.281
lib230524_GCTCAAACAGCGAGTA-1	2.634	8.23441
lib230524_GCTTCACCACACGCCA-1	3.12661	6.72042
lib230524_GCTTGGGGTGTTCCAA-1	8.20898	10.505
lib230524_GGAAGTGGTACCCGCA-1	-2.48846	-1.36821
lib230524_GGAATGGAGGAAGAAC-1	0.889247	-3.45217
lib230524_GGACGTCAGCTACTAC-1	8.52988	11.1922
lib230524_GGAGATGGTGAACCGA-1	-4.41904	-5.90881
lib230524_GGAGCAAAGAGTGTTA-1	1.07082	6.49546
lib230524_GGATGTTCAAAGCACG-1	-0.35826	-4.68247
lib230524_GGCGTCAGTCATAACC-1	1.00559	7.40678
lib230524_GGCTTGGTCGTGACTA-1	2.49231	8.09731
lib230524_GGCTTTCCAATTGCCA-1	-0.3378	5.78089
lib230524_GGGAAGTGTTGGGATG-1	-0.03111	6.16272
lib230524_GGGACCTCAGAGTTGG-1	-0.707197	6.68528
lib230524_GGGAGATGTTGCTCGG-1	12.6665	-0.510676
lib230524_GGGCCATTCCTAAACG-1	-3.09129	-1.55031
lib230524_GGGCTACAGAAATTGC-1	0.881494	0.371709
lib230524_GGGCTACTCTGTCGTC-1	2.73447	8.24659
lib230524_GGGTAGAGTATGAGCG-1	-5.02169	-5.34814
lib230524_GGGTAGAGTGCAACAG-1	-4.23753	-0.797654
lib230524_GGGTCACCAGGTGTTT-1	3.53169	8.94651
lib230524_GGGTCACTCCTCATAT-1	2.89572	6.76106
lib230524_GGGTGAAGTTGTCAGT-1	1.55082	6.58599
lib230524_GGGTGTCTCCAAATGC-1	2.89015	8.64867
lib230524_GGGTTTAGTGAGCTCC-1	1.83726	-2.34137
lib230524_GGGTTTATCCATAAGC-1	3.23603	6.24813
lib230524_GGGTTTATCCTCTAGC-1	-1.61016	8.37126
lib230524_GGTCACGGTATAATGG-1	-4.12629	-1.44128
lib230524_GGTGGCTCATAGGAGC-1	0.181568	10.1087
lib230524_GGTGGCTCATTGACAC-1	2.40301	-0.231148
lib230524_GGTGTCGAGCGGTAGT-1	-2.29441	11.2262
lib230524_GGTGTCGCAATGCTCA-1	2.90621	8.8023
lib230524_GGTGTCGCATGATGCT-1	9.02115	11.5069
lib230524_GGTGTTATCAAGCCGC-1	-0.0443423	5.71133
lib230524_GGTGTTATCCCTCATG-1	-4.18921	-3.90306
lib230524_GGTTAACGTCGATGCC-1	-4.14227	-0.442272
lib230524_GGTTAACTCTCGCTCA-1	9.99449	9.29521
lib230524_GGTTCTCCAAGATGTA-1	12.5272	-0.224557
lib230524_GGTTCTCCAGGTGTTT-1	3.23857	-1.217
lib230524_GGTTCTCGTTGCACGC-1	-4.72143	-0.843809
lib230524_GGTTGTACAGCCGTCA-1	4.36482	-16.4812
lib230524_GGTTGTATCAGAGTTC-1	1.15914	9.92009
lib230524_GTACAACCATGACGGA-1	0.624538	-3.41775
lib230524_GTACAGTAGGGACTGT-1	2.50771	9.35397
lib230524_GTACAGTGTGGTCAAG-1	-0.488668	6.68272
lib230524_GTAGAGGAGCATGAAT-1	0.138718	7.70208
lib230524_GTAGAGGCACGGCGTT-1	3.15105	8.41764
lib230524_GTAGAGGCAGTCACGC-1	0.0676322	6.80756
lib230524_GTAGAGGTCTCTTGCG-1	2.08592	6.55851
lib230524_GTAGATCGTTATGTGC-1	0.319696	9.39226
lib230524_GTAGGAGTCATTATCC-1	3.26871	9.01501
lib230524_GTATTGGAGACCATTC-1	2.52708	9.0106
lib230524_GTCAAGTCACAAATGA-1	0.461476	8.38113
lib230524_GTCAAGTTCCTGATAG-1	3.33566	5.94603
lib230524_GTCAAGTTCGTGACTA-1	-1.09328	6.58557
lib230524_GTCACGGAGCAGTAAT-1	0.364521	6.35945
lib230524_GTCACGGTCGAAGCAG-1	2.52288	8.77773
lib230524_GTCACTCCAATGTGGG-1	-4.07898	-2.16189
lib230524_GTCATCCAGGTAGTCG-1	-0.612013	7.47463
lib230524_GTCATCCTCTTCTGGC-1	-1.70945	12.3856
lib230524_GTCATGAAGGGCGAGA-1	0.712321	7.32928
lib230524_GTCCACTGTTCACGAT-1	-4.46233	-0.724638
lib230524_GTCCCATGTACAGCGA-1	1.35616	5.1048
lib230524_GTCCCATGTCGCTTAA-1	2.37462	7.60167
lib230524_GTCCTCAAGCAGCGAT-1	-2.20263	7.5865
lib230524_GTCCTCACACGAAAGC-1	-3.84942	-4.31279
lib230524_GTCCTCATCGACCATA-1	-0.170719	9.62123
lib230524_GTCGAATCAGTAGAAT-1	-1.07737	9.29693
lib230524_GTCGAATTCTCGCCTA-1	1.59597	8.70022
lib230524_GTCGCGACAAGAGCTG-1	2.80478	10.2525
lib230524_GTCGCGAGTCCATCTC-1	-3.91368	-0.305904
lib230524_GTCGTTCCACATTGTG-1	1.72497	9.73374
lib230524_GTCGTTCGTGACTGAG-1	0.313151	9.77733
lib230524_GTCTCACGTCGCTTGG-1	-0.348821	7.18266
lib230524_GTCTGTCTCAAATGAG-1	0.167212	-2.39726
lib230524_GTGACGCTCGACATCA-1	-1.04532	7.61139
lib230524_GTGAGCCAGGTCCCGT-1	3.23565	10.1628
lib230524_GTGCAGCTCGTTCCTG-1	0.962603	-1.58799
lib230524_GTGCAGCTCTCTCCGA-1	-0.0798924	6.66755
lib230524_GTGCTTCTCTCGGTAA-1	11.9334	-2.09356
lib230524_GTGGAGAGTGTTAGCT-1	-2.41443	0.169991
lib230524_GTGTAACCAGGCTCTG-1	-2.00322	-2.58544
lib230524_GTGTGATAGTCACTAC-1	-3.59346	-3.10006
lib230524_GTGTTAGGTCCAGAAG-1	-0.536776	6.92686
lib230524_GTTACCCTCCGACGGT-1	9.45674	10.4145
lib230524_GTTACGACACACGTGC-1	1.76649	9.76139
lib230524_GTTACGACACTAGGCC-1	9.87363	9.34973
lib230524_GTTCATTAGCTATCCA-1	-4.6099	-1.28479
lib230524_GTTCATTCAGATCCAT-1	1.12846	0.32239
lib230524_GTTCATTTCGGTCAGC-1	2.67252	0.240012
lib230524_GTTCCGTCAGATTCGT-1	1.53978	7.24612
lib230524_GTTCGCTCACTTGTGA-1	3.1587	-0.764661
lib230524_GTTGAACAGAGCCATG-1	1.866	6.46757
lib230524_GTTGCTCTCATAGAGA-1	2.62277	9.86676
lib230524_GTTGTCCCAAAGACTA-1	2.52351	10.0441
lib230524_GTTGTGATCTGAGAAA-1	-6.00968	-5.36997
lib230524_GTTTACTAGCCATTCA-1	12.1762	-1.90627
lib230524_GTTTGGACAGGCGTTC-1	-1.73165	-4.43123
lib230524_GTTTGGATCCCTTTGG-1	3.04002	8.44498
lib230524_TAACACGGTTCCTAGA-1	-5.84938	-4.5157
lib230524_TAACGACAGTTCCATG-1	2.20657	7.05362
lib230524_TAACGACTCTGAGAGG-1	0.0631902	9.37727
lib230524_TAAGCACAGCATTTGC-1	-2.57226	-4.58317
lib230524_TAAGCCAGTGTAGTGG-1	-5.66469	-4.77453
lib230524_TAAGCGTCAGACACAG-1	-1.5915	4.92106
lib230524_TAAGCGTTCTCTCAAT-1	-1.22686	5.26788
lib230524_TAAGTCGCAATTCACG-1	3.04352	9.34434
lib230524_TAATCTCAGAGTCCGA-1	8.97915	11.4519
lib230524_TAATCTCAGGTACCTT-1	-1.49186	7.89315
lib230524_TAATTCCCAGCAGGAT-1	-0.278707	6.34825
lib230524_TACAACGAGGTAAGAG-1	-0.109237	6.31422
lib230524_TACAACGCATGGGTCC-1	-0.183588	7.22446
lib230524_TACAACGTCTTCTGGC-1	1.74824	9.51297
lib230524_TACACCCTCGGCTGAC-1	-3.45158	-4.04459
lib230524_TACCCGTTCTGCATGA-1	12.6916	-0.294388
lib230524_TACCGAAAGGGTATAT-1	9.11859	11.2616
lib230524_TACCGAACAACCAATC-1	-1.73916	12.3845
lib230524_TACGCTCCATCAACCA-1	1.75863	7.79693
lib230524_TACGCTCCATGACGAG-1	2.14913	-1.72342
lib230524_TACGGGCAGCTAGCCC-1	3.24714	8.71851
lib230524_TACGGGCGTGCGGATA-1	-2.20637	11.9143
lib230524_TACGGTATCCGCCTAT-1	1.58605	-1.7259
lib230524_TACGTCCCATTGAGCT-1	-4.57532	-4.58299
lib230524_TACGTCCTCAAATAGG-1	1.33444	9.25431
lib230524_TACGTCCTCCACTTTA-1	-2.01581	11.904
lib230524_TACGTCCTCGCCTATC-1	-1.43758	7.53418
lib230524_TACGTCCTCTACCCAC-1	1.5968	10.0549
lib230524_TACTGCCAGTCACTGT-1	1.86425	6.59993
lib230524_TACTGCCTCGCCAACG-1	-4.43262	-0.796453
lib230524_TACTTCATCGTGCGAC-1	0.076838	10.008
lib230524_TACTTGTAGTCTAGAA-1	-3.67673	-3.08816
lib230524_TAGAGTCTCGATCCCT-1	0.123656	9.77688
lib230524_TAGATCGCACATACGT-1	12.8758	-0.875644
lib230524_TAGCACAGTCCGGTGT-1	8.84133	11.4087
lib230524_TAGGAGGTCATCAGTG-1	3.07304	9.33998
lib230524_TAGGTACAGGTTCTAC-1	2.7022	8.5967
lib230524_TAGGTACGTGAGGAAA-1	-5.28417	-2.21954
lib230524_TAGGTTGAGCACTTTG-1	0.325224	7.95033
lib230524_TAGTGCAGTTACCTGA-1	2.37062	7.35309
lib230524_TATACCTAGGATTACA-1	-6.57282	-3.85229
lib230524_TATACCTAGGCTCTAT-1	-0.851154	7.2941
lib230524_TATCAGGAGGAGAGGC-1	3.33592	-1.24479
lib230524_TATCCTACACTGATTG-1	-5.1857	-1.55882
lib230524_TATCCTACAGTTACCA-1	-2.13735	8.14595
lib230524_TATCTGTCAGACAATA-1	3.24078	8.70972
lib230524_TATCTGTCATGACTAC-1	-1.47084	5.34913
lib230524_TATCTGTTCCCTCGAT-1	2.71363	6.99563
lib230524_TATGTTCAGACCTTTG-1	2.8181	-0.0198881
lib230524_TATTGCTAGCCTGACC-1	-2.16586	7.77938
lib230524_TATTGGGAGTGGTGAC-1	-2.21514	7.99918
lib230524_TATTGGGCAGCTTTGA-1	0.416909	8.91458
lib230524_TATTTCGGTGTTCCTC-1	8.96145	11.1127
lib230524_TCAAGCACAGCTGAAG-1	2.097	8.77144
lib230524_TCAATCTCACCAAATC-1	3.15434	10.192
lib230524_TCAATTCAGGGATCAC-1	-5.35934	-2.91142
lib230524_TCAATTCCAAGGCCTC-1	2.28275	9.98336
lib230524_TCAATTCTCGCGTCGA-1	-4.85682	-5.47759
lib230524_TCACATTGTATCGCAT-1	8.8615	11.2225
lib230524_TCACGGGAGCATCAAA-1	-2.52732	0.222697
lib230524_TCACTATAGACTCGAG-1	2.48414	6.86063
lib230524_TCAGGTACATCTGGGC-1	-1.29791	-3.39612
lib230524_TCAGTCCAGTCATGCT-1	-3.43283	-2.05845
lib230524_TCAGTCCGTCTTCTAT-1	-1.98869	-5.32686
lib230524_TCAGTGACACCCTGAG-1	3.11623	-1.13003
lib230524_TCAGTTTAGGGCAATC-1	5.21287	-15.7306
lib230524_TCATACTAGGATCATA-1	1.6896	7.14283
lib230524_TCATACTGTTCAGTAC-1	1.07298	0.0770135
lib230524_TCATATCTCAAGATAG-1	2.15878	-0.370684
lib230524_TCATCATCACGGTGAA-1	-2.16689	0.403627
lib230524_TCATCATGTGGAACAC-1	0.718224	-2.80437
lib230524_TCATCCGAGGACTATA-1	1.17973	0.221114
lib230524_TCATCCGCAGACAATA-1	9.40288	10.0509
lib230524_TCATGAGCATAGGCGA-1	-2.27401	0.773397
lib230524_TCATGAGGTTAGTCGT-1	-2.60275	-4.44797
lib230524_TCATTCAAGCAAATGT-1	2.09764	0.380848
lib230524_TCATTGTAGTTAGTGA-1	3.32532	10.2668
lib230524_TCATTGTCACAACATC-1	3.14417	9.06399
lib230524_TCATTGTCACTTGACA-1	-0.146822	7.21102
lib230524_TCATTGTCATGAATAG-1	2.89303	8.76553
lib230524_TCCACCAGTCAGGTGA-1	-2.09906	7.75571
lib230524_TCCACGTCATCGATCA-1	0.265407	8.44982
lib230524_TCCATGCCATGACTAC-1	0.201218	6.46038
lib230524_TCCATGCTCATCGCCT-1	-2.09567	12.0473
lib230524_TCCCACAAGATCGCTT-1	-3.62613	-0.362122
lib230524_TCCCAGTAGGTACAGC-1	2.47269	9.62446
lib230524_TCCCAGTCAGACGGAT-1	1.29461	6.47753
lib230524_TCCCAGTGTTTCGTTT-1	0.452675	6.54444
lib230524_TCCCATGCACAGTACT-1	0.325958	9.77588
lib230524_TCCCATGTCACACCGG-1	-3.33828	-0.932266
lib230524_TCCGAAAGTTCTTCAT-1	-4.90128	-5.39582
lib230524_TCCGATCCAGCAGAAC-1	2.24601	9.27348
lib230524_TCCGATCTCCCTCTTT-1	2.23962	9.07133
lib230524_TCCGATCTCGGAAGGT-1	-4.80089	-1.32799
lib230524_TCCGGGACACTTGAAC-1	-1.06622	7.45877
lib230524_TCCTAATAGCCAAGTG-1	-1.34428	5.36104
lib230524_TCCTCCCGTAGGAGTC-1	8.58782	11.0972
lib230524_TCCTCCCGTCGATGCC-1	-5.01265	-3.38309
lib230524_TCCTCGAAGTTTGTCG-1	0.847216	6.60113
lib230524_TCCTCGACAGCCATTA-1	-3.97873	-4.51334
lib230524_TCCTCGAGTTCCACGG-1	-2.07829	11.9962
lib230524_TCCTCTTGTGAGTAAT-1	-3.47844	-0.846301
lib230524_TCCTCTTTCCGTCACT-1	2.65435	9.19085
lib230524_TCCTGCAGTGCCTTTC-1	-3.32406	-4.62597
lib230524_TCCTTCTGTGAACGGT-1	-3.94417	-2.2492
lib230524_TCCTTTCGTATCGAAA-1	0.59952	9.04269
lib230524_TCGAACAGTCATCGGC-1	-2.82808	0.278893
lib230524_TCGAACATCTATACTC-1	-5.48864	-3.85422
lib230524_TCGAAGTCAGTTTCAG-1	2.596	0.145707
lib230524_TCGAAGTTCTGGCCTT-1	-4.06986	-3.36981
lib230524_TCGACCTGTGAACGGT-1	-4.32992	-0.84205
lib230524_TCGACGGTCTAGTACG-1	3.4446	-0.833464
lib230524_TCGATTTCACCGTGAC-1	3.49267	9.90372
lib230524_TCGCAGGCAGTCTCTC-1	1.61174	6.95167
lib230524_TCGCTCATCATCCTGC-1	-1.1269	5.14524
lib230524_TCGCTTGCAAAGGAGA-1	2.15145	9.28823
lib230524_TCGGATACATCCGATA-1	2.33863	8.64739
lib230524_TCGGATAGTCCACACG-1	-4.46979	-2.75822
lib230524_TCGGGCACAACACACT-1	0.488289	9.75207
lib230524_TCGGGTGCATAATGAG-1	-5.34331	-5.19628
lib230524_TCGGTCTGTGTGTCCG-1	-4.30017	-1.8432
lib230524_TCGTCCAGTTGCATGT-1	-0.279337	1.22653
lib230524_TCTAACTGTCATCTAG-1	1.2883	0.356843
lib230524_TCTACATGTGATCATC-1	2.36956	9.46954
lib230524_TCTATACGTGGCAACA-1	0.72632	7.86182
lib230524_TCTATACTCCATAGAC-1	8.83097	11.0325
lib230524_TCTATCAAGCCATTTG-1	3.05705	10.2593
lib230524_TCTCTGGTCTCCAATT-1	2.93593	8.65464
lib230524_TCTGCCACATTCTCTA-1	-3.62378	-3.52085
lib230524_TCTGGCTAGGTCCCTG-1	-3.60819	-4.04488
lib230524_TCTGTCGCACATACTG-1	2.70853	8.26119
lib230524_TCTGTCGCACTCCGGA-1	-4.17554	-4.36722
lib230524_TCTGTCGCAGCCTATA-1	3.37744	10.1487
lib230524_TCTTGCGCACGCTTAA-1	1.20733	-3.63777
lib230524_TCTTGCGGTCGCTTAA-1	1.2181	-2.91
lib230524_TCTTTGAAGCCTTCTC-1	2.70451	6.66926
lib230524_TGAACGTAGTTTCGAC-1	1.35323	8.9604
lib230524_TGAACGTTCGGCCCAA-1	1.1618	-1.86387
lib230524_TGAACGTTCGGTCATA-1	0.4425	6.39008
lib230524_TGAATGCCACGGCACT-1	-13.6101	3.14828
lib230524_TGACAGTGTTCTTAGG-1	2.82488	6.56113
lib230524_TGACAGTTCCTACGGG-1	0.488113	-1.01343
lib230524_TGACCCTTCCGGGACT-1	0.0577626	6.75608
lib230524_TGACGCGCATCCAACA-1	-4.32367	-0.68369
lib230524_TGACTCCCAATGAGCG-1	1.13441	9.6248
lib230524_TGAGACTCAATGCTCA-1	0.205111	6.22039
lib230524_TGAGACTCATCGGAGA-1	0.377638	5.38546
lib230524_TGAGACTGTCTCGGAC-1	0.633208	9.00742
lib230524_TGAGACTTCCTACCAC-1	1.06024	9.82465
lib230524_TGAGCGCAGCCTGACC-1	1.94797	0.245732
lib230524_TGAGCGCTCCGGACTG-1	1.06942	0.391313
lib230524_TGAGCGCTCGACCAAT-1	-4.13993	-1.686
lib230524_TGAGGAGCAGACGGAT-1	5.14728	-16.9112
lib230524_TGAGGGAAGGCTTAAA-1	-3.64218	-0.616018
lib230524_TGAGGGACATAGATCC-1	1.29103	-1.98315
lib230524_TGAGGGATCTTTGATC-1	-1.35513	8.98231
lib230524_TGATCAGGTGTCTTCC-1	-3.11105	-4.19528
lib230524_TGATCTTAGCAAACAT-1	2.06411	8.68702
lib230524_TGATCTTCAGTATTCG-1	2.26633	9.1928
lib230524_TGATCTTTCGGTAGGA-1	-5.17104	-4.1855
lib230524_TGATGCAAGCACACCC-1	-1.24319	8.21787
lib230524_TGATGCACATCATCCC-1	-6.34185	-4.5907
lib230524_TGATGGTTCCACTGAA-1	-3.58652	-1.66393
lib230524_TGATTCTAGCTGCCTG-1	2.08715	9.86489
lib230524_TGATTTCCACAGTGTT-1	-0.0872361	9.4619
lib230524_TGCAGATCAATCCTTT-1	12.1646	-2.0222
lib230524_TGCAGGCCAAGAGATT-1	-0.897768	5.69417
lib230524_TGCAGTATCCCGTTCA-1	-5.6232	-3.27296
lib230524_TGCCGAGAGAACTCCT-1	9.10635	11.1673
lib230524_TGCGACGGTGAGGCAT-1	8.43692	10.4809
lib230524_TGGAACTCATGACGAG-1	-4.07713	-1.26097
lib230524_TGGAACTTCGGTCTGG-1	0.0199774	6.03187
lib230524_TGGAGAGAGCACTCGC-1	-3.41195	-0.817094
lib230524_TGGAGGAAGGCAGCTA-1	1.905	7.41462
lib230524_TGGATCAGTAGGTGCA-1	-2.13532	7.91715
lib230524_TGGATCATCCTCACGT-1	-0.42791	6.08964
lib230524_TGGATGTCATCCCACT-1	2.60612	6.97703
lib230524_TGGCGTGGTCCAGTTA-1	3.2105	10.1714
lib230524_TGGGATTTCACCGACG-1	1.74537	-2.41521
lib230524_TGGTGATGTTTATGCG-1	1.1676	6.99542
lib230524_TGTAACGAGATGAACT-1	-0.233026	8.23473
lib230524_TGTAACGAGTTTAGGA-1	-1.01226	7.28057
lib230524_TGTACAGCACTACACA-1	2.75426	7.89183
lib230524_TGTCAGACAATGCTCA-1	1.71979	6.15738
lib230524_TGTCAGACAGTACTAC-1	3.05567	6.61438
lib230524_TGTCCACAGCATGCAG-1	2.59602	0.224287
lib230524_TGTCCACAGTAGCCAG-1	3.00989	8.2693
lib230524_TGTCCACCATCTAGAC-1	-1.91754	12.1304
lib230524_TGTGTGAGTAGTAAGT-1	0.0356102	9.62939
lib230524_TGTTACTAGAGAACCC-1	1.38852	-1.97912
lib230524_TGTTACTCATTGGATC-1	12.6569	-0.520561
lib230524_TGTTCATAGAAGGCTC-1	-5.46422	-4.38281
lib230524_TGTTCCGCAAGTGGGT-1	2.2783	7.33595
lib230524_TGTTGAGAGACCTCAT-1	2.29829	8.1251
lib230524_TGTTGGATCCATTTAC-1	0.792166	6.21363
lib230524_TTACAGGAGGTTATAG-1	1.96319	7.23731
lib230524_TTACCATAGCCTGCCA-1	-1.65536	7.72924
lib230524_TTACCATTCTACTATC-1	-4.69037	-0.732632
lib230524_TTACCGCAGGATTACA-1	3.19989	-0.840482
lib230524_TTACGCCCAGCTTTGA-1	3.29834	10.0301
lib230524_TTACGTTAGTTTCGGT-1	-1.80132	12.1155
lib230524_TTAGGCAAGACATCCT-1	-4.55178	-1.22178
lib230524_TTAGGGTAGTACCCTA-1	3.50824	6.02353
lib230524_TTAGTCTTCCTTCGAC-1	1.32028	-1.41298
lib230524_TTATTGCAGGGACAGG-1	-1.72107	12.0076
lib230524_TTATTGCCAGCTGTCG-1	1.63817	-0.865999
lib230524_TTATTGCTCCTCGCAT-1	-4.20006	-4.42986
lib230524_TTCAATCAGACGGAAA-1	-2.02912	7.72923
lib230524_TTCAATCGTGTATACC-1	1.42572	5.69447
lib230524_TTCAATCTCATTGCGA-1	0.223146	-1.90464
lib230524_TTCAATCTCTCAAAGC-1	3.25602	-0.879419
lib230524_TTCACCGGTATTAAGG-1	-2.80523	-2.89654
lib230524_TTCACGCCACAGAGCA-1	2.8055	8.83873
lib230524_TTCACGCGTCTCGGGT-1	-3.22191	-0.645433
lib230524_TTCATTGAGGACTTCT-1	-1.30191	8.39105
lib230524_TTCCAATAGTCGAAGC-1	-0.252608	6.01277
lib230524_TTCCACGAGACTAAGT-1	0.711582	6.89359
lib230524_TTCCGTGAGACAACAT-1	0.718096	3.13239
lib230524_TTCCGTGGTTGTAGCT-1	-0.0632016	9.70683
lib230524_TTCCTAAAGCGGGTAT-1	-0.65959	6.07015
lib230524_TTCCTAACACACCTGG-1	-4.67614	-3.93567
lib230524_TTCCTCTTCATACGGT-1	-0.851671	6.73572
lib230524_TTCCTTCTCCATTTCA-1	2.72095	10.0021
lib230524_TTCGATTGTCATAACC-1	12.4622	-2.3117
lib230524_TTCGGTCGTTGTCCCT-1	-0.150481	5.99191
lib230524_TTCTAACCAGCTTTCC-1	1.22593	9.74372
lib230524_TTCTAACGTGACTCTA-1	-1.54764	6.8308
lib230524_TTCTAGTGTATAGGAT-1	2.60027	8.41244
lib230524_TTCTCTCTCATCTACT-1	-3.69143	-4.62327
lib230524_TTGACCCCAATAACGA-1	-1.53117	8.04245
lib230524_TTGATGGCAACTGCCG-1	2.15746	-1.66255
lib230524_TTGCATTAGGAATGTT-1	0.460133	7.26692
lib230524_TTGCATTTCGTAACAC-1	-5.01881	-3.01114
lib230524_TTGCGTCGTCGTATTG-1	-0.365453	5.64435
lib230524_TTGCTGCAGCACTCCG-1	-1.94857	0.747518
lib230524_TTGGATGTCGAGAAGC-1	2.11443	8.19752
lib230524_TTGGGTAGTAGTACGG-1	-1.69352	12.3275
lib230524_TTGGTTTCAAGTCATC-1	8.67123	11.34
lib230524_TTGTGGAAGCTAGCCC-1	-0.298137	9.33095
lib230524_TTGTGTTAGCATCAGG-1	-2.15568	7.44326
lib230524_TTGTTCAAGCGGATCA-1	2.01353	7.46127
lib230524_TTGTTGTCATCGGAAG-1	-2.15396	1.12577
lib230524_TTGTTTGCATGTACGT-1	-0.0405752	-1.92342
lib230524_TTGTTTGTCTGGGATT-1	-6.29121	-4.6274
lib230524_TTTATGCCAATCGCGC-1	2.6354	0.271725
lib230524_TTTCAGTAGTTGCTCA-1	0.139093	9.52056
lib230524_TTTCCTCAGCGAACTG-1	-1.3075	-0.962126
lib230524_TTTCGATCACGTTGGC-1	3.0172	8.50179
lib230524_TTTGACTAGGGCAACT-1	0.261704	7.06636
lib230524_TTTGATCAGTCTTCCC-1	-6.06612	-4.54033
lib230524_TTTGATCTCGACGCTG-1	2.10289	-1.86088
lib230524_TTTGATCTCTCGCAGG-1	0.82466	7.13966
lib230524_TTTGGTTAGCTAATGA-1	1.14993	6.36325
lib230524_TTTGTTGGTAACATCC-1	-5.06992	-4.74745
lib230331_AAACCCACACTCCGAG-1	0.743679	4.8002
lib230331_AACCAACCACTTCTCG-1	-3.22278	-1.70069
lib230331_AACCTTTTCGAGAAAT-1	-1.20611	7.24887
lib230331_AAGACAACAAGAGTGC-1	0.143056	-6.59225
lib230331_AAGACAATCCCATTTA-1	-1.86143	-6.92463
lib230331_AAGCATCAGCTAAATG-1	4.73358	5.88093
lib230331_AAGCCATCACTGCGTG-1	-1.40885	-1.44619
lib230331_AAGTTCGAGCGAGGAG-1	-1.95783	-6.79751
lib230331_AATCACGGTACGATCT-1	4.10365	5.79834
lib230331_AATGCCACACGCGCTA-1	2.83615	9.98034
lib230331_AATGCCACAGCTACTA-1	0.453241	2.79651
lib230331_ACAAAGACATCGCCTT-1	-2.47842	-2.32155
lib230331_ACACAGTAGGAAGAAC-1	0.548468	5.36469
lib230331_ACACGCGAGACCTTTG-1	5.26212	5.85908
lib230331_ACAGGGACAAAGCTCT-1	-0.396556	4.97469
lib230331_ACCATTTTCCAGTGCG-1	-0.637259	-3.98655
lib230331_ACGATGTGTCCCACGA-1	0.814046	5.46342
lib230331_ACGGGTCCAATGTCAC-1	-0.0495384	-6.15535
lib230331_ACGGGTCCAGAACATA-1	2.10185	9.47312
lib230331_ACGTAGTCAACCCGCA-1	-2.26016	-6.83061
lib230331_ACGTAGTTCACGACTA-1	0.285486	4.81383
lib230331_ACTATGGGTAAGACCG-1	-1.68559	5.46959
lib230331_ACTCTCGAGGCTCTCG-1	4.22533	5.60482
lib230331_ACTGCAAGTACGACAG-1	5.36392	5.86765
lib230331_ACTGTGAGTCTTGCTC-1	4.34327	5.71921
lib230331_ACTTAGGTCAGCTGAT-1	1.20105	5.82461
lib230331_ACTTCCGCACACGTGC-1	9.25003	11.3868
lib230331_ACTTTCAAGAGCATCG-1	2.81108	-2.19128
lib230331_ACTTTCATCCTGTTGC-1	12.6043	-1.79014
lib230331_AGAACCTAGTGCAAAT-1	4.32875	5.78453
lib230331_AGACACTAGTACGTCT-1	5.22033	5.80374
lib230331_AGACCATGTGAGACCA-1	0.305473	6.51443
lib230331_AGACTCAAGGGATGTC-1	0.824806	5.78212
lib230331_AGACTCACAGACTGCC-1	0.103199	4.81905
lib230331_AGACTCAGTGAATTGA-1	-3.26617	-0.533025
lib230331_AGCATCAGTTATGGTC-1	-4.20572	-1.11357
lib230331_AGCCAGCTCTCTTCAA-1	-2.90231	-0.0435194
lib230331_AGCGCCACAATGACCT-1	-1.00723	-0.403996
lib230331_AGCTACATCGCTCATC-1	-2.18944	-6.5362
lib230331_AGCTACATCTTGAGCA-1	0.414413	8.22436
lib230331_AGCTCAAAGTGCAACG-1	-2.58412	-1.92635
lib230331_AGCTTCCCAAATCCCA-1	-2.69425	-3.80353
lib230331_AGCTTCCCATGCAGGA-1	0.249553	4.85461
lib230331_AGGCTGCCAGTCGCAC-1	2.57126	-2.0177
lib230331_AGGCTGCGTATCGATC-1	0.0338314	4.55181
lib230331_AGGTCATAGTTGGAAT-1	-4.796	-3.27351
lib230331_AGGTCATGTTGTGCAT-1	1.12717	6.0781
lib230331_AGGTGTTAGATGCGAC-1	1.26052	-2.62708
lib230331_AGTACCAGTCGGTACC-1	-2.33867	-6.76776
lib230331_AGTCAACAGCCTATCA-1	-3.68294	-6.11367
lib230331_AGTGACTCATCCGTTC-1	0.683965	7.01358
lib230331_AGTGTTGCACCAGTTA-1	5.30826	5.68269
lib230331_ATACCTTCACGTCATA-1	1.52738	-3.45699
lib230331_ATACCTTCAGCTACTA-1	-2.03322	-7.19915
lib230331_ATAGACCTCCTCCACA-1	9.01803	11.1683
lib230331_ATAGGCTTCCGCTTAC-1	-1.28843	-3.02006
lib230331_ATATCCTAGAGCAACC-1	-0.820913	0.277199
lib230331_ATATCCTCAGAAGTGC-1	-0.844481	-7.07931
lib230331_ATCCACCGTACTAACC-1	3.17132	10.1353
lib230331_ATCCATTGTTGACTAC-1	1.02216	0.00210331
lib230331_ATCGCCTGTACAAACA-1	0.33777	-6.50066
lib230331_ATCGGATAGTGACCTT-1	-2.49608	-6.63908
lib230331_ATCGTCCAGGGCAGAG-1	-3.19749	-4.23273
lib230331_ATCGTGAAGTCTTGGT-1	4.00292	5.90444
lib230331_ATCTCTATCAGCTTGA-1	-3.29716	-0.656268
lib230331_ATGCCTCCACGTTCGG-1	2.35481	9.62901
lib230331_ATGCCTCCATCATCTT-1	-2.19331	-7.05868
lib230331_ATGCCTCGTGATCATC-1	-2.27399	-2.53316
lib230331_ATGGAGGCAAGTACCT-1	-1.93851	-6.09427
lib230331_ATGTCTTTCGCCTAGG-1	-4.1508	-1.59665
lib230331_ATTATCCGTATCCTTT-1	1.00958	-2.87405
lib230331_ATTCAGGTCCGGTAAT-1	3.64883	5.8292
lib230331_ATTCATCCACAATCTG-1	-1.55686	12.1364
lib230331_ATTCCTACATCAGTCA-1	0.692997	-1.30858
lib230331_ATTCGTTAGCCGATCC-1	-1.48511	-6.09434
lib230331_ATTCGTTAGGCAATGC-1	-2.91205	-3.34796
lib230331_ATTGGGTGTTCGGTAT-1	-0.117927	-2.08829
lib230331_ATTTCACGTGCTGTCG-1	-3.22689	-0.388423
lib230331_CAACAACCAGTCGTTA-1	1.79911	8.69225
lib230331_CAACGATGTCAAGGCA-1	0.3938	5.57504
lib230331_CAATACGGTAGACACG-1	3.95872	5.91185
lib230331_CAATACGTCATCAGTG-1	-2.72328	-4.12433
lib230331_CAATGACAGAAAGTCT-1	4.11929	5.94552
lib230331_CACGGGTAGCAGGCTA-1	-1.03028	-0.323023
lib230331_CACTAAGCAAGCCTGC-1	9.48544	10.0713
lib230331_CACTGAAGTACTCGCG-1	-2.80897	-4.45619
lib230331_CACTGGGAGTGAATAC-1	1.54364	-3.98465
lib230331_CACTGTCCAAGTGTCT-1	0.555677	3.01771
lib230331_CAGCAATCAAGTATAG-1	0.985736	5.75925
lib230331_CAGCGTGAGGTCCCGT-1	0.039659	-1.42077
lib230331_CAGCGTGGTGATTCAC-1	-2.3202	-3.9078
lib230331_CAGCGTGTCGCGTAGC-1	-2.19436	8.17458
lib230331_CAGGCCAGTCTGCATA-1	0.486772	4.83401
lib230331_CAGTTCCCAAAGGGTC-1	0.477712	5.03769
lib230331_CATAAGCCACAATTCG-1	1.41038	6.57851
lib230331_CATCCACAGTGTTCCA-1	-2.74447	-4.0787
lib230331_CATCGTCAGTAAACAC-1	5.29195	5.79329
lib230331_CATCGTCCAACCGCTG-1	-2.01112	-5.17331
lib230331_CATGGTATCTGAGATC-1	0.479093	4.81282
lib230331_CATTCTAGTGCCAAGA-1	1.16451	3.36176
lib230331_CATTTCAAGTACTCGT-1	4.0795	5.64595
lib230331_CCACGAGAGCGTGCTC-1	1.85863	-2.75966
lib230331_CCACGAGAGTGTTCAC-1	-2.02779	12.0896
lib230331_CCACTTGAGAAACTAC-1	0.589501	2.81462
lib230331_CCACTTGTCGCTATTT-1	1.2395	5.72763
lib230331_CCCAACTCATCGAGCC-1	8.44621	10.9668
lib230331_CCCGGAACAAGGAGTC-1	5.17648	5.63621
lib230331_CCCTAACAGTAACGAT-1	9.7612	9.9747
lib230331_CCCTAACGTCTTAGTG-1	-0.642525	-2.74525
lib230331_CCCTAACGTGATTAGA-1	0.890663	6.41251
lib230331_CCCTAACTCTACACAG-1	-1.15996	-3.93848
lib230331_CCCTAACTCTATCCAT-1	-2.49684	-0.969354
lib230331_CCCTCAAAGACAAGCC-1	-1.18766	-6.41632
lib230331_CCCTGATAGTATCCTG-1	0.0205586	-6.6165
lib230331_CCGATCTTCATTTACC-1	3.43565	5.97218
lib230331_CCGTTCATCGCTCCTA-1	0.720337	4.98107
lib230331_CCTACGTTCACAGTGT-1	-0.17756	5.25858
lib230331_CCTCAGTTCTTGCAAG-1	-3.69692	-4.16147
lib230331_CCTCATGCAGACTGCC-1	2.80444	-2.22539
lib230331_CCTCCAAGTGAGATTA-1	0.424129	5.03974
lib230331_CCTCTAGAGGAACGTC-1	-1.91377	7.60833
lib230331_CCTCTCCTCACTCGAA-1	0.612236	5.45882
lib230331_CCTTGTGCATGTGACT-1	-0.659265	-6.93301
lib230331_CGAAGTTAGGGTACAC-1	0.223581	4.88988
lib230331_CGACAGCCAGACCGCT-1	0.529363	6.04207
lib230331_CGAGAAGAGAACTCCT-1	-3.71211	-6.59868
lib230331_CGAGGCTCATCCGATA-1	1.36786	-2.04659
lib230331_CGAGTGCAGCTGACAG-1	0.0839086	-6.28333
lib230331_CGATGCGAGGCGCTCT-1	8.69011	10.2511
lib230331_CGCATAATCTAATTCC-1	1.12957	5.82871
lib230331_CGCCAGAGTTACGCCG-1	1.34328	-2.21683
lib230331_CGCCATTCACAGTACT-1	12.7296	-1.90003
lib230331_CGGAACCCAAACCGGA-1	-3.32434	-2.92344
lib230331_CGGACACTCTGCTAGA-1	9.14717	11.4602
lib230331_CGGGACTGTCTTGGTA-1	1.86528	-4.82906
lib230331_CGGGACTTCAACGAGG-1	-5.21373	-4.12257
lib230331_CGTCAAACAAATGCTC-1	-2.76324	-6.67639
lib230331_CGTGATACAGGAGGTT-1	-0.637924	-7.004
lib230331_CGTTAGATCAACTTTC-1	0.436961	3.04198
lib230331_CGTTCTGAGCTTTCTT-1	3.1194	-1.16007
lib230331_CGTTGGGCACTAGGCC-1	13.0908	-1.87687
lib230331_CGTTGGGTCTGTCAGA-1	-1.76464	-1.75611
lib230331_CTAACCCCACAGAAGC-1	12.8627	-1.88567
lib230331_CTAACTTCATGTTTGG-1	8.94935	11.314
lib230331_CTAAGTGCAAGTGCTT-1	0.54208	5.06205
lib230331_CTAAGTGTCGGCACTG-1	0.806727	3.18183
lib230331_CTACTATGTGCGGTAA-1	0.667043	5.8816
lib230331_CTCAACCGTTTGAAAG-1	1.09122	-6.0568
lib230331_CTCACTGCAACGGCTC-1	-2.15003	0.0968542
lib230331_CTCAGGGCAGAGAAAG-1	0.764379	3.06978
lib230331_CTCCACACACACGTGC-1	-1.38481	-3.84837
lib230331_CTCCCTCAGCTTTCCC-1	-0.481914	-4.35608
lib230331_CTCCTTTGTAACTAAG-1	-3.00393	-1.13853
lib230331_CTCTGGTCAAGGTCTT-1	-4.34669	-4.28065
lib230331_CTGCATCCATGTAACC-1	1.3718	4.66248
lib230331_CTGCATCGTCCCTGTT-1	12.7263	-1.77693
lib230331_CTGGACGTCGGCGATC-1	-1.56624	6.40718
lib230331_CTGTAGACAGCGCTTG-1	1.01118	0.22496
lib230331_CTTAGGAAGGGTTGCA-1	2.00555	-4.15488
lib230331_CTTCCGAGTGGATCGA-1	9.20824	11.0909
lib230331_CTTCGGTGTCTCAGAT-1	1.35311	5.93535
lib230331_CTTCTCTTCAGACCTA-1	1.75442	5.96805
lib230331_GAACGTTAGAGCCATG-1	-1.15903	-6.15124
lib230331_GAACGTTTCTTAGTTC-1	-3.18806	-5.86138
lib230331_GAAGGGTAGAGGCTGT-1	5.26312	5.66377
lib230331_GAAGTAATCTTACCGC-1	-0.480004	0.712516
lib230331_GACACGCCAGCACCCA-1	-3.18933	-0.125356
lib230331_GACATCAAGTTTCGGT-1	0.948003	0.255328
lib230331_GACCAATTCCGATTAG-1	-0.416709	-6.64619
lib230331_GACCTTCCAGGTGACA-1	-1.15714	-0.340994
lib230331_GACTCTCCATATACCG-1	4.45885	5.65522
lib230331_GACTTCCAGACATATG-1	1.11735	-5.5214
lib230331_GACTTCCAGTGCAAAT-1	-0.136801	5.20256
lib230331_GAGACTTCAGGATCTT-1	-0.0711324	-6.48306
lib230331_GAGAGGTTCCACTGGG-1	5.35745	5.66498
lib230331_GAGATGGCATCCTTGC-1	2.86823	-1.04834
lib230331_GAGCTGCGTAAGTTAG-1	-1.13688	-0.270733
lib230331_GAGGCCTAGCCTGAGA-1	1.37114	7.02693
lib230331_GAGGGATAGAAGTATC-1	2.93428	8.06382
lib230331_GAGTCTATCCAGTACA-1	2.49499	6.02968
lib230331_GATGATCTCATAGGCT-1	-0.820149	-6.36085
lib230331_GATGTTGCACATACGT-1	0.693682	4.74644
lib230331_GATTTCTGTACTAACC-1	-3.05412	-1.67864
lib230331_GCACATACAGCGACCT-1	1.10564	5.65852
lib230331_GCACATATCGCTTACC-1	-0.335971	-6.21231
lib230331_GCAGGCTAGTAGGTTA-1	1.75047	6.56201
lib230331_GCATCGGCACCTCTGT-1	4.87684	5.64931
lib230331_GCCATGGAGCCTCCAG-1	0.143771	-4.25234
lib230331_GCCATGGCAAATTGGA-1	-3.83218	-4.22973
lib230331_GCCATGGCATCATGAC-1	2.15919	-3.41548
lib230331_GCCATGGGTTTGGGTT-1	0.766116	8.94392
lib230331_GCCATTCTCCCTTGTG-1	-2.58854	-3.49535
lib230331_GCCCAGAAGGCTCAAG-1	-3.02092	-3.28989
lib230331_GCCCAGATCTCCAAGA-1	-2.41874	9.93948
lib230331_GCCTGTTCAGTTGGTT-1	0.801439	5.59668
lib230331_GCGATCGTCTACCTTA-1	4.49374	5.82903
lib230331_GCGTGCAGTCCAGCCA-1	0.372497	4.9405
lib230331_GCGTTTCAGAGTGTGC-1	1.46735	5.72311
lib230331_GCTACAAGTAATGTGA-1	9.1476	11.4027
lib230331_GCTACAATCGTTCTAT-1	0.487981	3.22492
lib230331_GCTACCTTCGAATGCT-1	0.903715	-2.5069
lib230331_GCTGAATGTACCTATG-1	-0.658594	-3.85174
lib230331_GCTGGGTGTATCCTTT-1	1.89092	-3.78217
lib230331_GGATGTTGTAATCAAG-1	0.0802906	-2.10401
lib230331_GGCGTCAAGAATTGTG-1	0.759706	4.99023
lib230331_GGCTTGGCAGCGAGTA-1	-0.57172	-6.18381
lib230331_GGGACAACATTGCCTC-1	2.53241	6.85472
lib230331_GGGACAATCGTCCATC-1	-2.29517	-6.93313
lib230331_GGGACCTGTTGCATGT-1	-2.65423	-0.0961312
lib230331_GGGATGATCTATCACT-1	2.04625	-2.03849
lib230331_GGGCCATGTATCCTCC-1	-0.601205	-6.93469
lib230331_GGGCCATTCGAACGCC-1	-1.3779	-4.54725
lib230331_GGGTCACGTCCAAGAG-1	0.318496	-3.42059
lib230331_GGGTGTCTCCATTCAT-1	1.06203	0.222339
lib230331_GGGTGTCTCGAGAACG-1	1.5062	6.15113
lib230331_GGGTTATAGGTACAAT-1	-0.479687	-5.77492
lib230331_GGTCTGGGTGAGCGAT-1	-2.44696	-6.80565
lib230331_GGTGTTACAACTAGAA-1	1.7338	-4.01532
lib230331_GGTGTTAGTCAGGCAA-1	-1.91342	-6.97513
lib230331_GTAACACAGGGAACAA-1	-4.19423	-2.84418
lib230331_GTAAGTCCAGAGAAAG-1	1.6904	-1.39381
lib230331_GTAAGTCGTCAACGCC-1	3.82827	5.75792
lib230331_GTAATCGAGTTGCCCG-1	0.621885	2.87258
lib230331_GTAATGCTCGCTAGCG-1	-3.96028	-6.14384
lib230331_GTAGAGGCACCCTTGT-1	-1.66131	1.66243
lib230331_GTAGATCGTCTCACGG-1	-0.70627	-1.96405
lib230331_GTAGATCGTTAAGACA-1	4.85215	5.74667
lib230331_GTAGATCGTTTCAGAC-1	-1.98268	-6.82303
lib230331_GTAGGTTCACCTTCGT-1	-2.86657	-3.07382
lib230331_GTAGTACTCGAAGAAT-1	0.975838	5.53149
lib230331_GTCAGCGTCGCTTTAT-1	-1.75197	-3.42946
lib230331_GTCATCCGTCGCGTCA-1	-0.259282	-3.20563
lib230331_GTCCTCACAGGTCTCG-1	8.06245	10.811
lib230331_GTCGCGACAGGCGTTC-1	-1.6594	0.425974
lib230331_GTCTACCCAACGCCCA-1	-0.842245	0.47951
lib230331_GTCTACCTCCTAGAGT-1	9.95815	9.30525
lib230331_GTCTAGATCCCTCTCC-1	2.43638	8.65439
lib230331_GTGAGCCGTCATACCA-1	0.594884	2.95453
lib230331_GTGCACGAGTTCGCAT-1	0.0913136	5.22906
lib230331_GTGCTGGTCGTCACCT-1	0.762187	-6.00161
lib230331_GTGGCGTGTCTAACGT-1	-1.52063	-5.54357
lib230331_GTGTGGCCAAGTGGTG-1	-0.709639	-6.21791
lib230331_GTGTTCCTCTGCTTTA-1	5.07403	5.71443
lib230331_GTTACCCAGACACACG-1	1.38725	-1.65497
lib230331_GTTACCCAGGGCAATC-1	9.63224	10.1407
lib230331_GTTACCCGTCAAACGG-1	-2.34091	0.743793
lib230331_GTTCCGTAGGGTGAAA-1	9.61596	10.0951
lib230331_GTTCCGTTCGTAGGGA-1	0.421678	5.1776
lib230331_GTTCGCTGTAACGCGA-1	3.27581	-1.35951
lib230331_GTTCTATAGCGGTAGT-1	1.2759	0.159951
lib230331_GTTGAACAGGGCTTCC-1	3.07471	-0.612628
lib230331_GTTGAACGTTAGGCTT-1	0.272785	5.0997
lib230331_GTTGCGGTCTGTCCGT-1	0.491663	4.80362
lib230331_GTTGTAGGTGGCATCC-1	-5.17213	-3.83254
lib230331_GTTGTCCCAAACACGG-1	1.18151	0.215233
lib230331_GTTGTCCGTCGTTGCG-1	-1.79585	7.98689
lib230331_TAACGACTCAGTCATG-1	5.29293	5.66865
lib230331_TAACGACTCTCCACTG-1	2.93706	6.35334
lib230331_TAAGCCAAGAATTGTG-1	3.7133	5.89055
lib230331_TACCCACAGTGGATAT-1	-3.31884	-6.48809
lib230331_TACCGAATCATAGACC-1	4.99726	5.6703
lib230331_TACCGAATCTTGGAAC-1	1.51172	6.28897
lib230331_TACCGGGCATACTGTG-1	-2.40832	-3.78326
lib230331_TACCTCGTCTTACTGT-1	3.27338	-1.52205
lib230331_TACTGCCGTAGTAAGT-1	1.60158	6.33618
lib230331_TACTTACCACTGAATC-1	0.203317	-5.24619
lib230331_TAGGGTTAGTAACGTA-1	0.451867	5.60023
lib230331_TAGTGCACATAGGTTC-1	5.0191	5.83607
lib230331_TATACCTTCAGTGTTG-1	0.761841	3.07891
lib230331_TATCCTAGTGTAAACA-1	-2.73654	-0.306311
lib230331_TATTCCATCTTTACAC-1	-0.891593	-3.30856
lib230331_TCAAGCACAGTTGAAA-1	5.33952	5.74265
lib230331_TCAATTCTCTCATGCC-1	-2.49673	0.163421
lib230331_TCACAAGCACATAGCT-1	9.69533	10.0841
lib230331_TCACACCTCGGCATAT-1	-1.39807	-2.4218
lib230331_TCACACCTCTCAGTCC-1	-3.05271	-0.137957
lib230331_TCACATTTCACCCTGT-1	-2.08216	-6.59157
lib230331_TCACGCTCATCGCTGG-1	1.30978	8.61577
lib230331_TCAGTCCCAGTCAGCC-1	5.1409	5.70325
lib230331_TCAGTGACACATAACC-1	-1.2857	-0.720827
lib230331_TCAGTGATCTGGACCG-1	-0.9197	-6.85649
lib230331_TCAGTTTTCACTTCTA-1	0.634005	5.55732
lib230331_TCATCATGTGCCTTTC-1	1.34728	5.97245
lib230331_TCATCCGGTTCAAAGA-1	-2.99068	-3.42841
lib230331_TCATGCCGTATCACCA-1	4.00704	5.75655
lib230331_TCATGCCGTTTCTATC-1	1.2635	6.33746
lib230331_TCATTCAAGGTCGCCT-1	-4.08625	-0.894283
lib230331_TCATTGTAGCAGCCCT-1	4.32725	5.75565
lib230331_TCATTGTTCCTCTAAT-1	3.7022	5.88856
lib230331_TCCAGAACATAGGTAA-1	9.49435	9.99624
lib230331_TCCATCGCATGTGGTT-1	12.9738	-1.53477
lib230331_TCCCACAAGCGACTAG-1	-2.11832	7.7159
lib230331_TCCGATCGTTGTAAAG-1	-1.71877	-6.43598
lib230331_TCCGATCGTTGTCAGT-1	-0.204363	-2.67225
lib230331_TCCTCGACAGACGCTC-1	0.797768	6.18778
lib230331_TCCTCTTCATACAGGG-1	0.920105	-5.94689
lib230331_TCCTCTTGTAGTTCCA-1	9.62451	10.2029
lib230331_TCCTTCTTCACGTCCT-1	-0.24091	-1.24425
lib230331_TCGAACATCCCATTTA-1	13.0372	-0.575255
lib230331_TCGCACTCATACACCA-1	0.666377	-2.38381
lib230331_TCGGATATCACCTCTG-1	-1.35298	-3.58015
lib230331_TCTACCGCAATTTCGG-1	-2.62573	-6.5359
lib230331_TCTACCGCAGCTGTGC-1	0.683748	5.94144
lib230331_TCTATCAAGAACAAGG-1	1.9573	-1.75846
lib230331_TCTCAGCCAATGGCCC-1	12.7973	-1.94184
lib230331_TCTCTGGAGAGTAACT-1	-5.34229	-5.26114
lib230331_TCTGCCAAGCGGGTAT-1	12.5508	-2.14175
lib230331_TCTGGCTAGCCACCGT-1	2.12911	-1.75409
lib230331_TCTGTCGAGGACAACC-1	0.425022	2.94905
lib230331_TCTGTCGAGGCCTTCG-1	5.09387	5.74185
lib230331_TCTTGCGGTCTACGTA-1	3.33171	-1.01354
lib230331_TCTTTGACAGCTTTCC-1	0.613091	5.24291
lib230331_TCTTTGAGTCATCAGT-1	-0.454934	0.765915
lib230331_TCTTTGATCGAGAATA-1	-3.80501	-5.43389
lib230331_TGAACGTAGAGCCGAT-1	-4.28924	-6.62079
lib230331_TGAATCGCAGTAGATA-1	-1.14905	-4.11819
lib230331_TGAATGCGTTCGCGTG-1	-2.78209	-6.00496
lib230331_TGATGCAGTAACAGGC-1	3.69069	6.20483
lib230331_TGATGGTCACCACATA-1	4.62828	5.75533
lib230331_TGATGGTTCGCATAGT-1	-4.1766	-0.501506
lib230331_TGATGGTTCTTGGAAC-1	0.643268	4.89067
lib230331_TGATTTCGTTGTGCAT-1	0.70499	-3.7134
lib230331_TGATTTCGTTTATGCG-1	0.0179107	-6.52236
lib230331_TGCACGGAGGGAGGGT-1	-1.91009	0.994012
lib230331_TGCACGGCACGCAAAG-1	12.8838	-1.87936
lib230331_TGCAGTACATCCTATT-1	12.7448	-1.42516
lib230331_TGCATCCCAAGATCCT-1	0.549643	3.00261
lib230331_TGCATCCGTTCTTGCC-1	-2.40212	-3.75549
lib230331_TGCATGACAGATCACT-1	4.52799	5.73484
lib230331_TGCGACGTCCAGTACA-1	0.833918	5.10112
lib230331_TGCGGCACAAAGCAAT-1	-2.02358	-6.80699
lib230331_TGCTCGTCATCCGAAT-1	0.370663	-3.60652
lib230331_TGGAGAGCAATGAACA-1	5.16006	5.79339
lib230331_TGGAGAGCAGCACACC-1	5.14984	5.8451
lib230331_TGGAGGAAGCATACTC-1	8.55391	10.6046
lib230331_TGGAGGAGTACTCCCT-1	0.245683	4.60533
lib230331_TGGATCACAGAGAATT-1	-0.611273	-6.50603
lib230331_TGGATCAGTCGACTTA-1	4.15425	5.68485
lib230331_TGGATGTTCCGACATA-1	4.36542	5.67065
lib230331_TGGGCTGTCTAGTGAC-1	-2.08161	-6.02565
lib230331_TGGTACACAGGTCCCA-1	-2.9347	-0.0937152
lib230331_TGGTACAGTGGCTGAA-1	-1.08959	-0.212736
lib230331_TGGTGATAGACATCAA-1	-2.2113	-3.50353
lib230331_TGTAACGTCTTAATCC-1	-2.53835	-3.16204
lib230331_TGTCCCAGTCCAGCGT-1	-4.36539	-3.53653
lib230331_TGTGAGTAGTACTCGT-1	13.0311	-1.78725
lib230331_TGTGATGCAATTGCGT-1	0.833629	2.76838
lib230331_TGTGGCGCAAATGGTA-1	3.33772	-1.17052
lib230331_TGTTGGAAGTGGTTCT-1	-2.44408	-3.40707
lib230331_TGTTGGACAGGAAGTC-1	1.32088	6.73482
lib230331_TTACAGGCAAACTGCT-1	-0.651884	7.3126
lib230331_TTACGTTCAGCGTGCT-1	-0.220356	-1.56228
lib230331_TTCACGCGTGGCTACC-1	1.67503	-3.39612
lib230331_TTCATTGAGACTCATC-1	0.771328	2.96293
lib230331_TTCATTGGTTTCACAG-1	1.59471	-3.02924
lib230331_TTCCAATGTATGGAAT-1	-0.219061	-6.93089
lib230331_TTCCAATTCCCGGTAG-1	-2.97665	-2.21915
lib230331_TTCCAATTCCGAAGGA-1	12.4873	-1.90481
lib230331_TTCTAGTAGAGATTCA-1	3.45812	-1.08142
lib230331_TTCTAGTCACCCTTAC-1	0.589531	5.23955
lib230331_TTCTCTCTCCGCATAA-1	0.647505	-1.36884
lib230331_TTGATGGAGAGCATCG-1	-2.99264	-3.51231
lib230331_TTGCATTGTAAGCAAT-1	-2.90044	-3.31771
lib230331_TTGTTGTAGAATCGCG-1	-3.93683	-6.42809
lib230331_TTGTTGTCACCTGCAG-1	-4.24892	-4.71896
lib230331_TTGTTGTGTTGTCTAG-1	4.3421	5.7327
lib230331_TTTACCAGTTCTCGCT-1	9.75957	9.9685
lib230331_TTTACTGAGCCGTCGT-1	-0.91224	-3.53808
lib230331_TTTACTGTCATACGGT-1	-1.00841	-2.95745
lib230331_TTTATGCAGGCCACCT-1	-3.3517	-6.79458
lib230331_TTTATGCCAACATACC-1	1.47237	-2.96074
lib230331_TTTATGCTCCTACGGG-1	9.42672	10.3602
lib230331_TTTCAGTCAGAGTGTG-1	-1.45172	-0.97711
lib230331_TTTCATGTCCGCACTT-1	13.3173	-0.86346
lib230331_TTTCGATAGTCATAGA-1	5.06265	5.72022
lib230331_TTTGTTGAGCTGCCAC-1	1.81569	-3.28887
lib230331_AAACGCTGTCACAATC-1	0.400586	-6.11665
lib230331_AACCATGTCTTAGTTC-1	1.3044	-5.04956
lib230331_AACGTCAGTACGAGTG-1	0.382979	3.18212
lib230331_ACAACCACACGTACTA-1	1.34631	-5.64008
lib230331_AGATCCAAGTTCTCTT-1	-1.36057	-5.19855
lib230331_AGATCGTCATTGTACG-1	8.96645	10.8222
lib230331_AGGTGTTAGCTACTAC-1	0.860942	-6.00217
lib230331_AGTGATCAGGTCGACA-1	1.40342	-5.27697
lib230331_ATATCCTTCCGTGTAA-1	-0.12565	-5.79882
lib230331_ATCCACCTCCATTGGA-1	1.27053	-3.5862
lib230331_ATCCCTGCATTGAAAG-1	-0.699342	-5.47252
lib230331_ATCTTCAAGCACACAG-1	0.967238	-4.56348
lib230331_ATTGGGTAGTCAGGGT-1	-0.421294	-6.76951
lib230331_ATTTACCCATACAGAA-1	1.09508	-5.29664
lib230331_ATTTCTGGTGGCCTCA-1	-0.50499	-5.46805
lib230331_CACCGTTTCGAGCCTG-1	8.25787	10.1878
lib230331_CACTGTCAGGAGAATG-1	-2.98588	-3.94832
lib230331_CAGGGCTTCAGTGCGC-1	0.453744	3.13602
lib230331_CATCCCATCCGATAAC-1	8.45861	10.2407
lib230331_CATGGATTCCCATTCG-1	-0.211588	-6.38939
lib230331_CCAATGAAGTAAACTG-1	8.29245	10.1608
lib230331_CCAATTTTCGGACCAC-1	0.431303	-5.13418
lib230331_CCATAAGAGACTTGTC-1	-3.07829	-4.10478
lib230331_CCGATGGGTACACGCC-1	1.48024	-4.22737
lib230331_CCGGTGATCACCTGGG-1	-0.872046	-3.23891
lib230331_CCTAACCCACGCACCA-1	-2.38215	-5.81926
lib230331_CCTCCTCCACTACGGC-1	-5.69979	-3.77875
lib230331_CGAGGCTCAGTGGCTC-1	0.530008	-5.99849
lib230331_CGAGTGCTCACTGCTC-1	2.46337	-2.72263
lib230331_CGAGTTACACATCATG-1	-1.10792	-5.93013
lib230331_CGGAATTTCGCTGACG-1	9.13899	11.4647
lib230331_CGTTGGGTCAACCGAT-1	0.725417	-5.5199
lib230331_CTACATTAGACCAGAC-1	1.66862	-4.23149
lib230331_CTACATTTCGACCCAG-1	-0.252844	-5.70018
lib230331_CTACATTTCTTGCAAG-1	-3.11952	-2.94151
lib230331_CTACCTGTCTGGGATT-1	-1.05526	-5.07426
lib230331_CTAGACAAGCGCTTCG-1	-0.0112889	-5.54049
lib230331_CTCAAGAGTAATGATG-1	9.29913	11.5028
lib230331_CTGCTCACAGCTTCGG-1	-2.30374	-5.5314
lib230331_CTGTACCGTTACCGTA-1	0.773993	2.81923
lib230331_CTTCAATGTCCACAGC-1	-3.96155	-2.82631
lib230331_CTTTCGGTCTCATGCC-1	-2.68214	-0.979072
lib230331_GAACACTCAACGTATC-1	-0.929924	-5.06462
lib230331_GACTCAAGTACCATAC-1	-1.26035	-4.71575
lib230331_GAGGCAACAGCTAACT-1	1.25746	-2.93947
lib230331_GAGGGATCAACTCCAA-1	0.896122	-5.81113
lib230331_GATTCGACAGCAGACA-1	0.654258	2.89538
lib230331_GATTTCTAGACTCTTG-1	1.30333	-5.2442
lib230331_GCAACATCAATCGCAT-1	-4.93395	-3.21557
lib230331_GCACATAAGGAAGTAG-1	1.44002	-5.44138
lib230331_GCCAACGTCGTGACTA-1	9.81941	9.92564
lib230331_GCCTGTTGTAGATGTA-1	-0.697521	-3.2165
lib230331_GCGATCGAGGACAAGA-1	-2.45463	-6.16856
lib230331_GCTCAAAAGCACACAG-1	1.45993	-3.62431
lib230331_GGAGGATAGACTACGG-1	0.500766	2.99527
lib230331_GGGTTATGTTCCGGTG-1	1.16833	-3.25482
lib230331_GGTGATTAGAAGCTGC-1	-2.17674	-6.05482
lib230331_GTAACCAAGATGCTGG-1	-3.88929	-3.32334
lib230331_GTCCTCAAGGAAAGGT-1	-1.11185	-5.61793
lib230331_GTGGAGAGTTGTGGCC-1	-1.0252	-4.59519
lib230331_GTGTAACTCACTCTTA-1	-3.84166	-5.42776
lib230331_TAACCAGCATGTAACC-1	0.0690139	-6.09309
lib230331_TAACGACAGGATACCG-1	-2.41345	-5.11313
lib230331_TAAGCCAGTTTACCTT-1	3.41241	-1.51974
lib230331_TACCGGGAGTCATAGA-1	-0.573922	0.774708
lib230331_TACCGGGAGTCATGGA-1	-1.14123	-0.320438
lib230331_TCAATTCCAATCCTTT-1	1.57213	-1.86377
lib230331_TCACGGGTCCGAAGGA-1	-1.90941	-6.50092
lib230331_TCAGCCTAGTTATGGA-1	0.0950051	-5.85029
lib230331_TCCTTCTTCCATACTT-1	1.9086	-2.09308
lib230331_TCCTTTCAGTCGCCAC-1	1.46779	-5.53418
lib230331_TCGATTTTCATGCCGG-1	-3.02436	-5.11672
lib230331_TCGGGACAGACCATAA-1	-1.27179	-6.67438
lib230331_TCTACATCATCCGAGC-1	-0.216511	-5.8632
lib230331_TCTCTGGTCCAACTGA-1	9.91577	9.46184
lib230331_TCTCTGGTCTTTGCGC-1	-3.48063	-3.92038
lib230331_TCTGCCAAGCGTCAAG-1	8.39315	10.0838
lib230331_TGAGCATCATGTTCAG-1	0.831613	-5.77119
lib230331_TGCGGCACAGCAGGAT-1	0.514896	-4.22828
lib230331_TGCTCGTCATCCGATA-1	-2.52516	-5.71278
lib230331_TGCTTGCCACGATTCA-1	1.43902	-5.43576
lib230331_TGGGAGACAGATAAAC-1	1.13798	-2.75338
lib230331_TGGGTTAGTGCCGTAC-1	-2.11272	-4.86577
lib230331_TTAATCCTCGCTCTCA-1	-0.838029	-0.0342792
lib230331_TTAATCCTCTACAGGT-1	-1.19324	-6.66828
lib230331_TTACGCCCACGTGTGC-1	-3.68215	-5.05143
lib230331_TTCATGTTCCTGGGTG-1	-2.11412	-5.87254
lib230331_TTCATTGTCCTTATGT-1	1.86775	-4.19928
lib230331_TTCTAGTTCACTGAAC-1	0.0492108	-5.70455
lib230331_TTGGGCGTCCCGATCT-1	8.30459	10.1022
lib230331_TTTACGTTCTGAACGT-1	1.11112	-5.46774
lib230331_AAACCCATCTCCCAAC-1	-2.53782	10.6186
lib230331_AACCACATCAGGACAG-1	-2.80294	-1.06803
lib230331_AACGGGATCTAAGAAG-1	5.0644	-16.693
lib230331_AATGGCTGTTTGAACC-1	8.45147	10.7632
lib230331_ACACAGTCAGGCCCTA-1	12.3701	-0.178629
lib230331_ACCCTCATCCGACGGT-1	-2.0664	11.7032
lib230331_ACCCTCATCTTGGTGA-1	1.98596	-3.81715
lib230331_ACTTCCGCATAATGAG-1	-1.28508	5.67943
lib230331_AGACACTGTACTAGCT-1	-2.75994	-1.29738
lib230331_AGAGCCCAGAAGCGCT-1	-0.754994	6.93863
lib230331_AGGGCTCGTAGCGTAG-1	-1.45953	-5.22576
lib230331_AGGGTTTAGAAGCTCG-1	-2.43522	7.99239
lib230331_AGTCATGTCTGTCGTC-1	9.68838	10.1306
lib230331_ATACTTCAGAAGGGAT-1	-2.5299	-1.65865
lib230331_ATCATTCCAAGAAACT-1	-2.21064	-0.67992
lib230331_ATGGAGGTCGGAGATG-1	-0.981293	5.48208
lib230331_ATGGTTGTCACGAGGA-1	9.53063	10.3364
lib230331_CAGGCCAAGCGTGAAC-1	-2.33717	7.30982
lib230331_CATTTCAGTCGTCATA-1	0.782998	-0.907902
lib230331_CCGATGGGTGTCTCCT-1	-1.41374	12.5203
lib230331_CCGGTAGTCCGGCTTT-1	1.13801	0.424879
lib230331_CCGTGAGCACTTGGCG-1	1.8144	-1.4433
lib230331_CGAGGAATCGACGCTG-1	-1.94701	-1.24428
lib230331_CGGGTGTTCCCGAGAC-1	-0.283386	1.18641
lib230331_CTACATTTCAAAGACA-1	-2.43293	7.55393
lib230331_CTCCAACGTTCGGACC-1	3.31194	-1.32691
lib230331_CTCGAGGCACCAAAGG-1	-5.67304	-5.41436
lib230331_CTGTGAACACTGAGTT-1	13.3997	-1.07925
lib230331_CTTCTAAGTGCATACT-1	2.93997	-0.962222
lib230331_CTTTCGGTCGCGTGAC-1	5.13278	-16.8646
lib230331_GACCAATCACTTGGGC-1	12.2652	-0.0810359
lib230331_GAGAAATGTCTGTGAT-1	-1.80048	0.843339
lib230331_GATCCCTGTGTGTCCG-1	-0.362353	1.28893
lib230331_GATGCTATCATGAGGG-1	12.1923	-0.209978
lib230331_GCAGCCATCTCCAATT-1	-1.16168	5.55275
lib230331_GCATCTCAGGGATGTC-1	-2.39025	0.844216
lib230331_GGAACCCAGTACCCTA-1	0.529516	2.98151
lib230331_GGAATCTCAATCGTCA-1	-1.0719	-0.417145
lib230331_GGCGTCAGTTCCGCGA-1	-1.45936	5.07143
lib230331_GGTCTGGCAGTCGCTG-1	-3.40466	-0.516825
lib230331_GTCCACTCACTTTAGG-1	9.11378	11.33
lib230331_GTGAGCCCAATAGTAG-1	1.4349	-5.69488
lib230331_GTTGCTCGTACGCTTA-1	-1.2592	5.32334
lib230331_TAACACGCATCGCTAA-1	-2.75755	-1.31455
lib230331_TACAACGTCTGAGGTT-1	-1.27845	-2.41716
lib230331_TACACCCAGATTGATG-1	-1.38575	5.48838
lib230331_TACGGTAAGGCGCTCT-1	0.0211508	-1.23702
lib230331_TACTTACGTAGCGTTT-1	-1.24852	-2.48296
lib230331_TCACGCTAGGTTGACG-1	-0.249912	5.37689
lib230331_TCATACTGTTTACGAC-1	-1.27859	5.05136
lib230331_TCATATCTCTCCCAAC-1	-1.02072	5.40049
lib230331_TCGACGGCATAGTCGT-1	-2.02876	0.653464
lib230331_TCTAACTCAGTCACGC-1	12.9669	-2.06969
lib230331_TGAACGTAGGTTGAGC-1	2.13424	-1.85961
lib230331_TGGGAGATCGTGTCAA-1	13.3523	-1.32523
lib230331_TGGGCTGAGCACTAGG-1	-0.956892	-0.290293
lib230331_TGGGCTGCACTGGCCA-1	9.13894	10.8226
lib230331_TGTGAGTCAGGAATCG-1	-1.73325	0.446494
lib230331_TGTTCATGTTCCGTTC-1	1.09472	-1.36641
lib230331_TTATTGCAGACGCCCT-1	-2.7114	-0.181336
lib230331_TTCCAATCAAGATGTA-1	-1.35644	5.22457
lib230331_AAAGTGACATGGGAAC-1	-6.45852	-4.0277
lib230331_AACAACCGTAATTGGA-1	-2.2454	-2.09376
lib230331_AACACACCAGCTACCG-1	-2.90198	11.3794
lib230331_AACGAAAGTGGGCTCT-1	-4.0467	-4.4819
lib230331_AAGACTCAGGTTCTCG-1	8.95559	11.3926
lib230331_AAGACTCAGGTTCTTG-1	9.15344	10.8664
lib230331_AAGATAGAGACTCTTG-1	0.661016	-5.61375
lib230331_AAGTTCGCAGCAGTAG-1	-2.53976	10.5284
lib230331_AATGAAGAGTCCCAAT-1	3.34538	-1.32012
lib230331_ACAAGCTCAGGTGGAT-1	0.77807	-5.31981
lib230331_ACACCAATCGGTGTTA-1	-1.71496	0.67397
lib230331_ACAGGGAGTGCGACAA-1	-0.980355	6.92086
lib230331_ACATCCCAGGCTATCT-1	-2.66537	-3.6419
lib230331_ACATCCCAGTTGGACG-1	-0.0708425	6.13581
lib230331_ACATGCAAGACGACGT-1	-2.98923	-5.91847
lib230331_ACCATTTTCCGTGGTG-1	-3.98035	-0.498516
lib230331_ACCCTTGCAGAGTCAG-1	-2.02369	-6.04188
lib230331_ACCTACCGTTCGTACA-1	3.17986	-1.44593
lib230331_ACCTACCTCATGCCGG-1	-4.41674	-2.60989
lib230331_ACGCACGCAAACGGCA-1	1.82289	8.82394
lib230331_ACGGTTAAGGTAAAGG-1	0.290482	-2.20761
lib230331_ACGTAACGTGACACAG-1	0.381491	-2.57418
lib230331_ACGTTCCGTTACGGAG-1	-3.86977	-3.84838
lib230331_ACTGATGGTCACTTAG-1	-2.4456	11.0594
lib230331_ACTGCAAGTGGCCACT-1	-1.03761	-2.79945
lib230331_ACTGTGAGTTTCTTAC-1	-4.07024	-3.41859
lib230331_ACTTCCGCAAAGGCTG-1	2.19377	-3.25783
lib230331_ACTTCGCGTAATCAAG-1	0.526309	-1.59846
lib230331_AGAACAACATTATGCG-1	-1.52297	-4.40741
lib230331_AGACCATCAGACGATG-1	-5.47578	-4.38239
lib230331_AGACTCAGTAGTGTGG-1	-3.09253	-2.4511
lib230331_AGAGAGCCACCCTAGG-1	-1.77958	-5.37326
lib230331_AGATCCAGTAATGTGA-1	8.191	10.5181
lib230331_AGATCGTAGTACAACA-1	-3.38229	-3.37369
lib230331_AGCATCAAGCACGTCC-1	-1.75195	-5.90396
lib230331_AGCGCTGGTTAGAAAC-1	-0.862338	-3.02883
lib230331_AGCGCTGTCTCTATAC-1	-2.92695	-5.63544
lib230331_AGGAATAGTCCTCCTA-1	-5.64471	-3.9372
lib230331_AGGAGGTGTGCCTTCT-1	0.646337	-5.5323
lib230331_AGGATAATCAAGTCTG-1	3.24522	-1.56519
lib230331_AGGGAGTTCAAGTCTG-1	-3.43416	-0.578387
lib230331_AGGGCTCGTTAAGACA-1	-1.06427	-0.691759
lib230331_AGGGTGAAGTTGCGCC-1	-1.37845	-6.1338
lib230331_AGGGTTTCATGCCATA-1	12.6606	-1.22923
lib230331_AGGTAGGTCAAGTAAG-1	-2.40785	10.6501
lib230331_AGGTTACGTACCCGAC-1	0.0569589	-2.8334
lib230331_AGTAGTCGTAGGAAAG-1	-1.1886	-5.54246
lib230331_AGTGCCGTCTAAGCCA-1	-2.38842	10.8155
lib230331_AGTGTTGCACCCTTAC-1	0.0300577	9.11763
lib230331_ATACCTTCACTCATAG-1	-4.92804	-3.99959
lib230331_ATACTTCCACAGCTGC-1	-1.32196	-5.30441
lib230331_ATAGACCAGAGTCTGG-1	-0.758578	-5.94544
lib230331_ATAGAGAGTGTGTCCG-1	-4.25361	-3.79892
lib230331_ATATCCTAGTTCTACG-1	12.7856	-1.82061
lib230331_ATCACGATCATTCGTT-1	-0.746593	-5.8845
lib230331_ATCGATGGTGTGCTTA-1	-3.06824	-3.50407
lib230331_ATCGCCTCAAGGCAAC-1	0.181301	8.74746
lib230331_ATCGCCTCAGTGGCTC-1	-0.457774	-5.87475
lib230331_ATCGGATCAGTGCCTG-1	0.697016	8.81858
lib230331_ATCGTAGAGTCGCCCA-1	-1.74119	0.615772
lib230331_ATCGTCCAGGCTCCCA-1	-1.20734	-2.95323
lib230331_ATCGTGACAGAGAAAG-1	-1.65562	6.50002
lib230331_ATCTTCAGTGAGGCAT-1	-1.45075	9.10722
lib230331_ATGACCACATGGCCAC-1	1.04397	-5.53905
lib230331_ATGCGATGTTCTAACG-1	1.48388	6.69324
lib230331_ATGGGAGGTTCGGCCA-1	-4.04775	-4.61676
lib230331_ATTATCCAGTGATAAC-1	1.17247	-5.1716
lib230331_ATTCCATGTTGCTCGG-1	-0.0526392	-1.32322
lib230331_ATTCTTGCAACTTCTT-1	0.00208404	9.82552
lib230331_ATTTACCGTGCATCTA-1	-0.188792	-5.39209
lib230331_CAAGAGGTCAACACGT-1	0.563279	-2.23095
lib230331_CAAGCTAGTAATGATG-1	-2.04636	-6.08614
lib230331_CAATTTCCATAACAGA-1	-1.4217	-1.40684
lib230331_CACAGATAGAGGGCGA-1	-3.07881	-5.53207
lib230331_CACAGATTCCACTTCG-1	-2.98715	-3.59226
lib230331_CACAGATTCCTTACCG-1	-0.965382	-3.37191
lib230331_CACAGGCAGCCACAAG-1	-3.04463	-3.11335
lib230331_CACAGGCTCAGCTGTA-1	-3.89805	-3.12891
lib230331_CACGGGTAGCACCGTC-1	-3.15398	-2.14107
lib230331_CACGGGTCACATGTTG-1	12.6926	-1.52573
lib230331_CAGATACTCACGAGGA-1	0.0890339	9.17043
lib230331_CAGATTGGTCATCAGT-1	-1.77119	-5.29535
lib230331_CAGGCCACATGCTGCG-1	10.0175	9.26907
lib230331_CAGGTATCATAGTCAC-1	13.1287	-1.23062
lib230331_CATACAGTCAGCTTCC-1	-1.58452	-0.614149
lib230331_CATAGACCAGACCTAT-1	-0.975878	-3.45743
lib230331_CATCCACCACCACTGG-1	-5.61071	-3.54371
lib230331_CATCCACCACCAGGTC-1	-0.398766	8.22771
lib230331_CATCCACGTGGTCCCA-1	0.933491	6.55808
lib230331_CATCGGGAGCGGATCA-1	-1.50072	-4.00287
lib230331_CATCGTCCAACCGTGC-1	10.083	9.4581
lib230331_CATGAGTAGGCTGGAT-1	-4.72898	-5.98821
lib230331_CATGCAACACCGTGCA-1	-3.17611	-6.36545
lib230331_CATGCGGCATCCGTGG-1	-0.618518	-5.21018
lib230331_CATTCCGGTCGAGTGA-1	-1.38593	-6.25604
lib230331_CCAATGAGTTGTGGCC-1	-4.08164	-4.64158
lib230331_CCACCATAGATGAACT-1	-2.58442	10.7699
lib230331_CCATCACTCATTTACC-1	-4.66755	-5.05685
lib230331_CCCGAAGCAAGGCAAC-1	2.03377	-2.43092
lib230331_CCCGAAGTCCAGCCTT-1	-0.841533	-3.30501
lib230331_CCCTAACTCATTGTGG-1	-2.84712	-5.53716
lib230331_CCGTTCAGTCCTATAG-1	8.71126	11.047
lib230331_CCTACGTAGGATGTTA-1	-3.05003	-5.11597
lib230331_CCTATCGAGTTGGACG-1	-1.25323	5.03356
lib230331_CCTCAACCAGGTTCAT-1	-1.60592	-3.54686
lib230331_CCTCTAGGTGGTGATG-1	-2.74432	-0.135437
lib230331_CCTCTAGTCTTACGTT-1	-3.5404	-6.1547
lib230331_CCTGTTGCAGATTAAG-1	13.5711	-1.46875
lib230331_CGAAGTTCATTCTCCG-1	-2.11049	-6.0776
lib230331_CGAGAAGTCCATCCGT-1	-5.51223	-4.25119
lib230331_CGATGCGAGTGGATTA-1	-0.833663	6.05097
lib230331_CGCATAAAGGCCTTCG-1	-1.07614	-2.48931
lib230331_CGCATAAGTGGCTGCT-1	-2.80804	-5.98754
lib230331_CGCGTGAAGCACCGAA-1	13.0885	-1.6972
lib230331_CGGACACAGCATCAAA-1	-1.52688	0.639182
lib230331_CGGAGAATCGGAGCAA-1	-3.84719	-4.96408
lib230331_CGTCAAAAGTACTGTC-1	-2.74321	-0.733817
lib230331_CGTGTCTGTTACGCCG-1	1.53898	-1.49585
lib230331_CTAACTTCAGCTTTCC-1	13.2529	-1.63755
lib230331_CTAGACAGTGCCTAAT-1	-1.57146	-6.65679
lib230331_CTATCTACACAGCCAC-1	3.37753	-1.3786
lib230331_CTCACTGAGAGTCTGG-1	0.137805	-6.02646
lib230331_CTCAGGGTCGTCACCT-1	-0.210427	-4.37937
lib230331_CTCATGCTCGAAGTGG-1	-2.94927	-0.131688
lib230331_CTCCATGAGTGGCAGT-1	0.132551	4.60669
lib230331_CTCGAGGCAATCCTAG-1	13.6493	-1.61418
lib230331_CTCTCAGAGTCATCGT-1	-0.534954	5.88749
lib230331_CTGAGCGAGGGAGGGT-1	-2.69295	-4.00607
lib230331_CTGCCTATCATCCTGC-1	3.00322	-1.63267
lib230331_CTGGCAGTCCCTTGGT-1	-3.03724	-3.98765
lib230331_CTGTATTTCAATCAGC-1	-1.25173	-3.23366
lib230331_CTTCCTTAGCTTTGTG-1	0.542774	-2.6525
lib230331_CTTCCTTAGTCCTACA-1	13.1128	-1.95401
lib230331_CTTCTCTCACACCTAA-1	1.81712	-2.04399
lib230331_CTTGAGAGTCAGGAGT-1	-5.98172	-4.4587
lib230331_CTTTCAATCGAACCTA-1	-2.62042	-3.13229
lib230331_GAAACCTAGATTAGTG-1	-3.43055	-3.50386
lib230331_GAATCGTTCGGCATCG-1	-3.22883	-5.22342
lib230331_GACACGCTCTTCGTAT-1	-0.0823223	7.62022
lib230331_GACATCAAGGATATGT-1	-0.432138	6.40051
lib230331_GACATCACAAATGGTA-1	0.233176	-5.809
lib230331_GACCGTGAGCACACAG-1	1.76274	-2.77856
lib230331_GACCTTCTCCATCGTC-1	0.600773	9.84542
lib230331_GACGCTGCAGATCATC-1	0.562136	2.89068
lib230331_GAGAAATAGTCAATCC-1	-2.43054	-6.57454
lib230331_GAGAAATCAAAGAACT-1	0.504073	-5.36542
lib230331_GAGAGGTAGAGCACTG-1	-3.0453	-0.728047
lib230331_GAGAGGTGTTGCGTAT-1	0.987115	-5.56381
lib230331_GAGGGATCAGAAACCG-1	-0.583451	0.543322
lib230331_GAGGGTATCCTACCAC-1	-4.25538	-4.01727
lib230331_GAGTGTTCACATATCG-1	-4.48157	-5.29997
lib230331_GAGTTGTCAACGGTAG-1	-2.49914	-6.00465
lib230331_GATGACTTCAGTCACA-1	13.3103	-1.41826
lib230331_GATGTTGCAACGATTC-1	-1.74616	0.734615
lib230331_GATGTTGCAGCTGTAT-1	2.75279	-2.02556
lib230331_GATTCTTTCCGACATA-1	-0.460299	0.949454
lib230331_GATTTCTGTTATCTGG-1	-3.14647	-3.34002
lib230331_GCACGGTCAGGAACCA-1	-1.58661	8.91473
lib230331_GCAGCTGTCGGTCTGG-1	-3.16345	-4.74566
lib230331_GCCAGCAGTCCGCAGT-1	-2.63328	-5.96318
lib230331_GCCATTCAGACAACTA-1	1.38603	-0.528854
lib230331_GCCATTCGTGAAGCGT-1	-3.92555	-4.93692
lib230331_GCGATCGAGCGCCCAT-1	2.61597	0.271256
lib230331_GCTACCTCACCGGAAA-1	-1.2118	-0.521354
lib230331_GCTCAAAGTGAATGAT-1	2.71919	0.213078
lib230331_GCTGAATAGATGACCG-1	1.61679	-2.15782
lib230331_GGAATGGCAAACGGCA-1	-2.84297	-6.18827
lib230331_GGATGTTAGTCACAGG-1	-0.323321	-5.9379
lib230331_GGCTGTGCAATAACGA-1	-1.3648	1.95702
lib230331_GGCTTGGTCACCATGA-1	0.628042	-5.74847
lib230331_GGGACCTTCTCATTAC-1	-2.40797	-3.98092
lib230331_GGGCCATTCAAGGAGC-1	-1.35738	-5.90803
lib230331_GGGTGAACACACCGCA-1	-1.11096	-6.14646
lib230331_GGGTGAACATCATTGG-1	-2.4076	-3.36237
lib230331_GGTGAAGAGTAGAATC-1	2.43087	-2.08006
lib230331_GTAATGCTCTTTCGAT-1	13.3603	-1.39002
lib230331_GTACAACAGAACTCCT-1	0.779682	-5.66398
lib230331_GTACAGTTCGCACGAC-1	-1.17393	-2.85402
lib230331_GTAGAGGAGGAACTCG-1	-2.34382	9.8298
lib230331_GTAGCTATCACCTCGT-1	-3.08544	-2.75072
lib230331_GTATTTCTCTCTAGGA-1	-0.585538	0.888895
lib230331_GTCATCCAGGTTGGAC-1	-3.87645	-4.38951
lib230331_GTCGTAAGTCATTGCA-1	-2.35107	-3.60054
lib230331_GTCGTTCGTCGTACTA-1	-0.22687	-5.76289
lib230331_GTCTGTCAGTTCATGC-1	-2.45736	-3.67147
lib230331_GTCTGTCCAAGAGTAT-1	-3.70579	-3.91683
lib230331_GTGAGTTTCACCATCC-1	-3.35524	-5.95436
lib230331_GTGCTGGCAACCGGAA-1	-1.69779	-3.21035
lib230331_GTGGTTATCAGTCTTT-1	-4.01754	-0.47965
lib230331_GTGTGATCACTCCTTG-1	-0.2078	-6.05011
lib230331_GTGTGGCCAGACTGCC-1	-2.1141	-3.74809
lib230331_GTTACGAAGAGAGGGC-1	-5.37842	-5.33069
lib230331_GTTACGAGTTCTCCAC-1	-1.88301	-3.35136
lib230331_GTTAGACCACGCAGTC-1	2.8992	-1.78775
lib230331_GTTCATTAGACCAGAC-1	-2.79152	0.150716
lib230331_GTTCGCTCAATAGTAG-1	-2.69885	-5.40195
lib230331_GTTGTGAAGACGCATG-1	12.9203	-2.06231
lib230331_TAAGCGTCACCAAAGG-1	-4.51777	-4.95178
lib230331_TACCCACTCTCCGAGG-1	-0.1946	6.13872
lib230331_TACCCGTCATCTAGAC-1	-1.05324	-4.81268
lib230331_TACCGAAGTAACAAGT-1	-3.06306	-4.31901
lib230331_TACCGGGGTAGCGTAG-1	-4.64144	-2.46634
lib230331_TACCTGCCATACTGAC-1	9.91191	9.27508
lib230331_TACGGTATCAACCTCC-1	-2.84675	11.1166
lib230331_TACTTCAGTGAGCAGT-1	2.76948	0.0646446
lib230331_TACTTCATCGGTGTAT-1	0.387275	-5.4121
lib230331_TAGACTGAGCTAATCC-1	1.05624	-5.85524
lib230331_TAGAGTCAGGATGGCT-1	-0.734312	-5.57751
lib230331_TAGGTACCATAAGCAA-1	-1.11816	-0.388711
lib230331_TAGTGCACACATGACT-1	-3.99231	-4.73232
lib230331_TATCTGTAGCCGATCC-1	-1.52244	-0.523853
lib230331_TATCTGTCACACTGGC-1	0.296474	3.22911
lib230331_TATCTGTCATCACCAA-1	-3.77731	-6.34882
lib230331_TATCTTGCATGAAGGC-1	-1.41578	-5.93862
lib230331_TATGTTCGTATTAAGG-1	-1.14967	-5.66862
lib230331_TATGTTCGTCTACTGA-1	-0.5492	0.959591
lib230331_TATTCCATCGTCCATC-1	0.111007	9.26456
lib230331_TATTGCTAGTCATACC-1	0.975094	-5.25699
lib230331_TCAATCTGTGTGTGTT-1	-3.4509	-3.88341
lib230331_TCACAAGAGTGCGACA-1	-3.98163	-5.46316
lib230331_TCACGCTCAACCGCCA-1	-5.96267	-3.81118
lib230331_TCACTCGAGGTTCAGG-1	-1.47871	-4.19162
lib230331_TCAGGTAGTATTCCTT-1	-2.07611	-3.97734
lib230331_TCAGGTAGTGGCATCC-1	2.22318	-1.76713
lib230331_TCATCCGCACAGTCCG-1	-3.95234	-5.86158
lib230331_TCATTCACAACTGCTA-1	-2.18289	-3.35957
lib230331_TCCAGAACAGCAGGAT-1	-0.284001	-1.89424
lib230331_TCCCAGTCAACTAGAA-1	0.830922	-5.36027
lib230331_TCCCAGTTCTAGTTCT-1	1.89161	-1.3186
lib230331_TCCCATGGTCGTGATT-1	-0.746943	-6.05832
lib230331_TCCGATCAGTTCCAGT-1	-3.18815	-5.34309
lib230331_TCCTGCATCGGCGATC-1	-6.12672	-4.70914
lib230331_TCCTTCTGTATTTCCT-1	-0.553639	-2.15846
lib230331_TCCTTTCCATGAAGGC-1	-1.95949	-4.59509
lib230331_TCGAACACAAGCGGAT-1	0.867134	-1.6535
lib230331_TCGCACTTCCATTCGC-1	-1.20993	-2.54903
lib230331_TCGCTCATCCTTTAGT-1	-0.0341542	-4.86709
lib230331_TCGGTCTAGTTGTAAG-1	-3.13951	-2.98453
lib230331_TCTAACTGTTGACTAC-1	-4.19105	-4.07028
lib230331_TCTATACGTTCCAAAC-1	0.275893	-5.55606
lib230331_TCTATCATCTGTCGCT-1	-3.5372	-2.86179
lib230331_TCTCACGCAACAGATA-1	13.4506	-1.70827
lib230331_TCTCAGCAGGTGATAT-1	-4.72188	-3.71508
lib230331_TCTCAGCGTCAACACT-1	2.84873	-0.0465907
lib230331_TCTCCGAAGTTTAGGA-1	0.796603	-5.72887
lib230331_TCTCTGGTCGAATGCT-1	0.651574	-5.712
lib230331_TCTGCCATCACGACTA-1	-1.56859	5.09331
lib230331_TCTTAGTCATGGCTGC-1	-0.761519	-0.664507
lib230331_TGAGACTCAAATCAGA-1	-0.643737	0.657221
lib230331_TGAGCGCCATCGGATT-1	2.71644	-1.87372
lib230331_TGATTCTGTATCTCGA-1	-2.61269	-5.09911
lib230331_TGATTCTTCAGCTGTA-1	-1.57065	4.94086
lib230331_TGATTTCCAACAACAA-1	-0.73777	-4.45487
lib230331_TGCAGGCTCTTACGGA-1	-0.833317	-6.39504
lib230331_TGCATCCCAATCCAGT-1	-2.87121	-2.98431
lib230331_TGCCGAGAGGTGTGAC-1	-0.969323	-0.11928
lib230331_TGCCGAGAGTAGACAT-1	0.418293	-5.89239
lib230331_TGCGGCAGTATCGCTA-1	-1.58472	8.59987
lib230331_TGCGGGTCAGTAACAA-1	-0.361702	-5.73475
lib230331_TGCTGAAAGGATACAT-1	-0.380006	5.80949
lib230331_TGGAACTAGTAACGTA-1	0.725009	9.14014
lib230331_TGGGATTTCTTACCGC-1	-5.62608	-4.53172
lib230331_TGTCCACAGGCCATAG-1	-2.51641	-3.53393
lib230331_TGTCCCAGTCATTCCC-1	2.40392	-1.91253
lib230331_TGTCCTGGTCCCGGTA-1	-1.71219	-4.25029
lib230331_TGTGAGTCACCATTCC-1	-2.06568	0.968667
lib230331_TGTGGCGGTGGTTCTA-1	-2.91244	-4.57726
lib230331_TGTTCATTCAAGCTTG-1	1.0636	-5.55608
lib230331_TTACCGCTCGTGCAGC-1	-3.06133	-4.62181
lib230331_TTACGCCCACAGTCCG-1	-1.24903	-3.13794
lib230331_TTCAATCTCGATCCCT-1	0.760894	-5.97189
lib230331_TTCATGTGTCTACGTA-1	-3.4647	-0.658156
lib230331_TTCGGTCCATGCCATA-1	-1.50797	-4.06546
lib230331_TTCGGTCGTTCCCAAA-1	2.42216	-2.35467
lib230331_TTCTCTCCATGACAGG-1	0.179102	-1.72771
lib230331_TTGCATTAGCATACTC-1	-1.65766	-2.78886
lib230331_TTGCCTGAGTAGATCA-1	-0.632994	0.87454
lib230331_TTGCGTCAGAGGATCC-1	-1.50462	5.10677
lib230331_TTGGATGAGGGAGATA-1	-4.44492	-4.89951
lib230331_TTGGATGCAGAGGCAT-1	-2.9489	11.1618
lib230331_TTGTTTGGTATCGTGT-1	-2.42581	-6.35853
lib230331_AACGAAACAATGTTGC-1	1.11033	3.2866
lib230331_AAGACAACACATACTG-1	-2.93493	11.3392
lib230331_AAGCCATGTGGATTTC-1	-2.73387	11.4267
lib230331_AATGCCACATCTAACG-1	1.15207	5.79062
lib230331_ACAGAAAGTCTTCTAT-1	-2.74506	10.7415
lib230331_ACATCCCTCCTTTAGT-1	-2.93939	11.3575
lib230331_ACATTTCAGTCTACCA-1	-1.08709	-0.328761
lib230331_ACCAACATCTGGCCGA-1	-2.7988	11.1202
lib230331_ACCTGAATCCTACTGC-1	1.61245	4.51764
lib230331_ACCTGTCCAGAACCGA-1	1.70274	4.15896
lib230331_ACGTACACAGGAGACT-1	1.80469	3.80824
lib230331_AGAACCTGTCAGGAGT-1	-2.86474	10.7802
lib230331_AGCCAGCCACAGAAGC-1	1.55174	3.96198
lib230331_AGCGCCAAGCTAAGTA-1	1.62224	3.87147
lib230331_AGGACTTGTTGGGCCT-1	1.57006	3.9115
lib230331_AGGTCTAAGGATTCAA-1	1.75651	3.99219
lib230331_AGGTTACAGACCAACG-1	1.84704	4.46085
lib230331_AGTAGTCAGTGTTCCA-1	-1.80326	-2.49645
lib230331_AGTCACAAGCCTGACC-1	1.66517	3.93274
lib230331_ATCACGAAGGAGTCTG-1	-1.78538	-3.73455
lib230331_ATCCATTTCGCGTAGC-1	1.84938	4.47432
lib230331_ATCGTGATCGAGCTGC-1	1.90893	3.90211
lib230331_ATCTTCAGTACCACGC-1	1.40024	4.20199
lib230331_ATGTCTTCATTATGCG-1	-2.32753	11.0621
lib230331_ATTGTTCAGGAACGCT-1	1.45534	4.46617
lib230331_CAAAGAACAAATACGA-1	1.21637	0.507992
lib230331_CACCGTTGTTGCGTAT-1	1.60662	4.25079
lib230331_CAGTTAGGTACGGATG-1	-0.388432	1.11907
lib230331_CATACCCGTTCTCAGA-1	1.65943	4.07635
lib230331_CATAGACCACTACTTT-1	1.89155	4.38115
lib230331_CCGGGTATCATGACAC-1	-2.63077	11.0788
lib230331_CCTACGTTCCTCAGGG-1	-2.8281	11.5252
lib230331_CGCAGGTCAGTGGCTC-1	1.51236	3.77744
lib230331_CGCCATTAGGCCACTC-1	-1.76815	8.79913
lib230331_CGGCAGTCATTCTCCG-1	0.902045	0.408802
lib230331_CGTAATGAGTCACTCA-1	-2.87499	10.9523
lib230331_CGTGCTTAGTGGTGAC-1	9.68833	10.1729
lib230331_CGTTGGGAGTGTTCCA-1	-2.65247	11.3575
lib230331_CGTTGGGGTTGGCCTG-1	1.79403	4.38646
lib230331_CTAGGTACAACCCGCA-1	-1.0685	-3.35844
lib230331_CTATCCGCAATCTCGA-1	-1.21004	-0.551735
lib230331_CTCATCGAGTCCCAAT-1	1.87013	4.05952
lib230331_CTCTCGATCTCTGACC-1	1.76571	4.44268
lib230331_CTGAGGCAGATAGTGT-1	1.48672	3.59373
lib230331_CTGTAGAGTGCCTAAT-1	-1.8013	5.45936
lib230331_GAAGGACTCCCAAGCG-1	0.344101	2.977
lib230331_GATCATGCAGACCTGC-1	-2.89489	11.2519
lib230331_GCATGATAGGCTCAAG-1	-1.89592	12.2912
lib230331_GCCAGTGAGACCACGA-1	-2.76499	10.8704
lib230331_GGAATCTGTCATCTAG-1	1.75065	4.3211
lib230331_GGAGGTACACATCCCT-1	1.93155	4.18368
lib230331_GGCACGTAGGGCGAAG-1	1.63416	3.68161
lib230331_GGGCTCATCGGCTCTT-1	1.54286	4.84914
lib230331_GTAATCGCACAATTCG-1	1.5818	4.0143
lib230331_GTCATCCCAGAACTAA-1	1.76632	4.08628
lib230331_GTCCTCAGTAGTTCCA-1	-1.2484	9.54326
lib230331_GTTATGGCAAGATGGC-1	1.67748	3.83652
lib230331_TACTTACTCTACCTTA-1	0.860405	4.95095
lib230331_TAGCACAAGAGGTTTA-1	1.39042	3.56479
lib230331_TCCAGAAGTATACGGG-1	-0.486678	1.04841
lib230331_TCCCAGTTCTGGTTGA-1	1.84462	4.10929
lib230331_TCCGATCGTCTAGGTT-1	1.50188	4.76044
lib230331_TCGCACTTCATTACGG-1	1.75157	4.1973
lib230331_TCGGGCACATAGATGA-1	-0.68182	0.534371
lib230331_TCTAACTAGTATCTGC-1	0.00360085	9.87324
lib230331_TCTACATAGAATAACC-1	1.48461	4.58921
lib230331_TGAGCATAGATGTTCC-1	1.61227	4.27446
lib230331_TGAGGGACAAGGTCTT-1	1.25255	4.66507
lib230331_TGCTTCGTCTCGTGAA-1	1.54871	4.42041
lib230331_TTCCTTCTCTTACTGT-1	1.02066	3.23591
lib2_AACCTTTAGCGACTGA-1	-2.30515	0.670057
lib2_AACCTTTTCCGCAAAT-1	-4.83373	-3.03584
lib2_AACGAAATCATCACTT-1	13.3518	-1.23885
lib2_AACTTCTCAATGCAGG-1	-2.03007	-4.2054
lib2_AAGAACACAACGTATC-1	-3.12253	-2.13309
lib2_AAGACAACATGATGCT-1	0.077976	-6.03198
lib2_AAGACTCCACCGGTCA-1	-6.02167	-4.11623
lib2_AAGCCATAGGAGCTGT-1	-6.25709	-4.87514
lib2_AAGTCGTTCTTGGAAC-1	1.61891	11.3925
lib2_AATCACGTCCTTCTAA-1	-3.60621	-4.95432
lib2_AATCGACTCGTCAGAT-1	-3.15719	-5.72811
lib2_AATTCCTCAGTATACC-1	-0.673522	-6.60081
lib2_ACAAAGATCATTCGGA-1	12.1255	-1.55409
lib2_ACAAGCTTCTCTGCCA-1	1.30992	11.9753
lib2_ACAGAAAAGCCTCTGG-1	-1.97638	0.669464
lib2_ACATTTCCACGCACCA-1	-1.87885	11.3418
lib2_ACCCTTGTCGCTCATC-1	14.1861	-1.45086
lib2_ACCGTTCGTTTCACAG-1	-2.19139	-7.00277
lib2_ACCTACCGTCTGTCCT-1	-4.2543	-3.31945
lib2_ACGCACGCATTACGGT-1	-3.73082	-4.54763
lib2_ACGCACGGTACGACAG-1	-3.2181	-4.50344
lib2_ACGTAGTAGGAGAGTA-1	-5.42821	-3.82121
lib2_ACGTAGTGTGAGACCA-1	-1.0293	-5.83508
lib2_ACGTCCTTCGGCTTGG-1	-0.932171	-5.89927
lib2_ACTATCTTCTGTCGTC-1	1.66053	11.7805
lib2_ACTATTCTCAGACTGT-1	-2.09325	11.2818
lib2_ACTGTCCTCTCAAAGC-1	-1.88234	11.4142
lib2_ACTTATCTCTTAGCCC-1	1.52732	11.8784
lib2_ACTTTGTGTATCGAAA-1	-4.20924	-5.66941
lib2_AGAAGTAAGCGCTGAA-1	-5.17928	-3.3706
lib2_AGACACTAGGTGCTAG-1	-4.16629	-5.39675
lib2_AGACACTTCAGGACGA-1	-3.12206	-6.16179
lib2_AGACACTTCTTCACGC-1	-3.7598	-3.7015
lib2_AGAGAATGTCTCACGG-1	-4.98569	-4.29495
lib2_AGCATCATCACAAGAA-1	-2.99641	-1.73968
lib2_AGCCAATTCCTTATCA-1	-2.84972	-0.457437
lib2_AGCCACGCATGTTCAG-1	-4.0201	-4.76138
lib2_AGCGATTTCCAAGGGA-1	-5.27066	-5.64561
lib2_AGCGTATTCTGGAAGG-1	0.88046	6.9546
lib2_AGCTTCCCAGGTATGG-1	-6.00754	-5.41571
lib2_AGCTTCCGTGTTTACG-1	1.6537	11.3126
lib2_AGGATCTTCTTCTCAA-1	0.997254	7.84288
lib2_AGGCTGCTCTCTCAAT-1	-13.6376	3.1441
lib2_AGGGTTTGTGGCGTAA-1	-6.04752	-4.62202
lib2_AGGTCTATCCTTATGT-1	8.61557	11.0733
lib2_AGGTTACCAGAGATGC-1	-4.81433	-6.14002
lib2_AGGTTACTCTATCGCC-1	14.2247	-1.38451
lib2_AGGTTGTTCCTATTTG-1	13.5853	-1.84151
lib2_AGTGCCGAGCGATTCT-1	-5.6703	-3.24906
lib2_AGTGTTGAGTCAGAGC-1	-4.48626	-4.63768
lib2_ATACTTCGTGTAAATG-1	-4.9877	-6.07339
lib2_ATAGGCTAGACCATGG-1	-4.49845	-5.53077
lib2_ATCACAGCAGAACTCT-1	-1.92349	0.60361
lib2_ATCAGGTAGGTTCACT-1	-13.5611	3.24738
lib2_ATCCACCGTTTCACAG-1	-13.5963	3.2202
lib2_ATCCGTCAGCCTGTGC-1	0.284722	-6.12077
lib2_ATCCGTCGTCTACTGA-1	-6.45539	-4.10334
lib2_ATCGATGTCCTCACGT-1	-6.29402	-4.99753
lib2_ATGACCAGTCGTGGTC-1	-4.66196	-6.2467
lib2_ATGGAGGCACGTATAC-1	-4.50275	-5.46856
lib2_ATTACCTTCGAAGGAC-1	13.5415	-1.32907
lib2_ATTACTCAGACGACTG-1	-2.81263	-0.479635
lib2_ATTCACTCATCCTTGC-1	1.60093	11.6705
lib2_ATTCAGGCACGAGAAC-1	1.43216	10.9695
lib2_ATTCCATGTTAATCGC-1	-5.38661	-3.93653
lib2_ATTCTTGAGGATTTGA-1	11.7708	-1.39225
lib2_CAACAGTGTTCACGAT-1	-13.7513	3.00546
lib2_CAACCTCCAGCTGAGA-1	11.7399	-1.63984
lib2_CAACCTCCATCGATAC-1	12.7438	-1.35656
lib2_CAACGATGTTCACGAT-1	12.4197	-0.910319
lib2_CAAGCTACATCGTTCC-1	-2.29456	0.147863
lib2_CAATGACCAAGTGACG-1	1.59095	11.8369
lib2_CAATTTCTCGAGAAAT-1	-5.71473	-5.57312
lib2_CACACAATCGAAGCAG-1	-4.82873	-4.36455
lib2_CACAGATGTGCAATGG-1	-3.71433	-0.917953
lib2_CACGAATTCCGAGTGC-1	-3.56639	-3.55651
lib2_CACGGGTTCCGTGTGG-1	-4.39732	-3.25321
lib2_CACGTGGAGCATTTGC-1	-1.07795	-6.17378
lib2_CACTAAGCACCTATCC-1	-5.04652	-5.60159
lib2_CACTGAAGTGGTCTCG-1	-3.78037	-4.96985
lib2_CACTGGGTCCATGCAA-1	5.38106	-15.7782
lib2_CACTGGGTCGAGGCAA-1	-6.25239	-4.58451
lib2_CACTGTCCAATCACGT-1	-2.05821	11.3715
lib2_CACTGTCTCCATGCAA-1	14.2337	-1.49155
lib2_CAGATCAAGGAGTATT-1	-4.94633	-5.16059
lib2_CAGCAATGTTGTCTAG-1	14.172	-1.52203
lib2_CAGCCAGGTTGCTTGA-1	13.6993	-1.34891
lib2_CAGCCAGTCTCTCGAC-1	-3.92548	-3.96605
lib2_CAGTTAGTCTTGCGCT-1	-2.28389	11.2319
lib2_CATAAGCCACGTTCGG-1	-6.10478	-3.89506
lib2_CATACCCAGTTGGGAC-1	-5.23647	-5.06147
lib2_CATCCGTAGAGGGTGG-1	1.51322	11.3179
lib2_CATCGCTCAATCGCGC-1	-3.15995	-0.940879
lib2_CATCGGGTCTTAGCTT-1	-5.66602	-3.73248
lib2_CATCGTCTCCGTGTAA-1	1.46771	11.576
lib2_CATGAGTCATTGGCAT-1	0.172453	-5.18177
lib2_CATGCTCTCGCTGACG-1	1.66707	10.7446
lib2_CATGGATTCCATTTGT-1	-4.44077	-4.84559
lib2_CATTCATGTTAGGCTT-1	0.464947	-6.09548
lib2_CATTCCGTCTACGCGG-1	-2.96399	-5.5911
lib2_CATTGTTGTACGATTC-1	-13.4933	3.24042
lib2_CATTGTTGTCGAACGA-1	12.8319	-1.71504
lib2_CCACGTTAGATCCTAC-1	-4.91498	-3.72261
lib2_CCATAAGCATCAGCAT-1	-2.40278	0.576072
lib2_CCATAAGCATGTGCTA-1	-4.71291	-5.20991
lib2_CCATCACCAACAAGTA-1	1.62609	11.6282
lib2_CCCATTGAGAGTTGTA-1	-5.88544	-5.33093
lib2_CCCTCAATCGATCCCT-1	-2.55575	-6.08172
lib2_CCGATGGTCTGGAAGG-1	-0.812557	-7.11508
lib2_CCGGGTATCACTTGGA-1	-5.64894	-5.30314
lib2_CCGGTGACAGTTGTCA-1	-3.37393	-0.991897
lib2_CCTAACCGTTGCATCA-1	-5.12924	-3.52942
lib2_CCTAACCTCCGCTAGG-1	-2.89379	-1.18581
lib2_CCTAAGAAGCCGTAAG-1	-5.8148	-3.7047
lib2_CCTAAGAGTTATTCCT-1	-3.30722	-0.702567
lib2_CCTCAACGTGCTGCAC-1	-13.7693	3.0049
lib2_CCTCAGTCAAGCTCTA-1	-1.6934	-5.99807
lib2_CCTCAGTGTGGCTTGC-1	-5.99318	-3.86916
lib2_CCTCAGTTCTCGAGTA-1	12.2877	-1.33891
lib2_CCTCATGTCGCATGAT-1	-6.36571	-4.86203
lib2_CCTGCATGTGGTATGG-1	11.8384	-1.04739
lib2_CCTGCATTCTACTATC-1	-2.94324	-5.97913
lib2_CCTGTTGAGCGAATGC-1	12.3848	-1.67298
lib2_CCTTGTGGTGGACTGA-1	-3.59375	-4.74612
lib2_CGAAGTTTCCATCTCG-1	-4.0277	-0.662534
lib2_CGATCGGCAGAAATTG-1	-3.37013	-4.70303
lib2_CGATCGGGTTTCGACA-1	-0.759989	-5.57299
lib2_CGATGGCCACTACTTT-1	-4.63905	-4.05951
lib2_CGGCAGTCAAACTAAG-1	1.57102	11.2192
lib2_CGGCAGTGTATCTTCT-1	-2.18232	10.9237
lib2_CGGGCATAGTACGTCT-1	1.696	9.67808
lib2_CGTGAATGTCACGCTG-1	-2.32669	-4.01918
lib2_CGTGAATTCGTTACCC-1	-1.51778	-5.60664
lib2_CGTTAGAAGTATGGCG-1	-2.3226	-3.59196
lib2_CTACAGACACACCTTC-1	-2.21244	0.999697
lib2_CTACTATAGCGGTAAC-1	-4.64879	-4.07553
lib2_CTAGGTAAGAATTGCA-1	0.00304868	-5.89802
lib2_CTATCTAGTCGCATCG-1	1.43386	11.9275
lib2_CTATCTATCAGAGTGG-1	-2.64049	-4.12731
lib2_CTCAATTCAAGCACCC-1	11.9509	-1.22694
lib2_CTCAATTGTATCAAGA-1	-1.99349	-6.33088
lib2_CTCCAACAGCGGGTAT-1	-5.56511	-4.37867
lib2_CTCCACAAGGTCACTT-1	12.9448	-1.3432
lib2_CTCCATGTCAGACATC-1	-2.34396	-4.70627
lib2_CTCCCAATCGGTCGAC-1	-4.75587	-3.71279
lib2_CTCCCAATCTCAGAAC-1	-13.7683	3.26396
lib2_CTCTCAGCAGGGAATC-1	-5.12209	-4.18756
lib2_CTGAGCGCAAATAGCA-1	1.33747	11.9571
lib2_CTGAGGCAGACTCATC-1	-3.20277	-4.78922
lib2_CTGAGGCCAAGCAGGT-1	-3.43883	-3.94845
lib2_CTGATCCAGCAACCAG-1	-5.56895	-4.40622
lib2_CTGCATCCACATTGTG-1	-3.73896	-5.67045
lib2_CTGCCATCAATCTCGA-1	-1.49341	-6.43643
lib2_CTGGACGAGGATGCGT-1	-3.75084	-3.80557
lib2_CTGGACGGTACTAAGA-1	12.0547	-2.27532
lib2_CTGTACCGTCTAGGCC-1	1.37354	11.3357
lib2_CTGTGGGGTCTTCATT-1	-4.44066	-6.04695
lib2_CTTCAATGTGATTCAC-1	-5.31951	-4.59145
lib2_CTTCGGTAGTCACTAC-1	-6.13176	-4.11743
lib2_CTTCTCTGTGGCAACA-1	-2.1847	11.3962
lib2_GAACACTGTAGGAGGG-1	1.7038	10.5119
lib2_GAACTGTCAATCACGT-1	-5.3725	-4.41229
lib2_GAACTGTGTAATCAAG-1	1.54336	10.991
lib2_GACACGCAGACGGTTG-1	-1.24032	-5.11944
lib2_GACATCACAGCACCCA-1	-3.92389	-1.7415
lib2_GACCTTCCAAGCGGAT-1	1.65144	11.1771
lib2_GACTTCCTCCGGGACT-1	-4.79498	-4.18061
lib2_GAGAAATGTCATAGTC-1	-2.39247	11.2395
lib2_GAGATGGCAATTCTTC-1	1.54873	11.6856
lib2_GAGCTGCAGCGAGGAG-1	-4.35523	-5.16025
lib2_GAGCTGCTCAGGAACG-1	-2.24675	11.9387
lib2_GAGGCAATCCTTCAGC-1	-3.95881	-4.98435
lib2_GAGTCATTCGAGATGG-1	-6.25323	-3.66597
lib2_GAGTTTGCAGGACAGT-1	-3.92575	-4.4604
lib2_GATCATGTCCGCACGA-1	14.0679	-1.71194
lib2_GATCGTAAGCTGTTAC-1	1.42126	11.7663
lib2_GATGATCCACCCATAA-1	-4.45788	-0.656884
lib2_GATGTTGCAGTTACCA-1	-3.61055	-4.56139
lib2_GCAACATAGGTCTGGA-1	-1.18867	-6.06402
lib2_GCAACCGCAGCTGAGA-1	11.9795	-1.70482
lib2_GCACGTGCATGGGATG-1	-5.07557	-2.89947
lib2_GCACGTGGTGTCATTG-1	-3.3802	-5.53239
lib2_GCAGCTGTCTTCCTAA-1	1.55927	11.7495
lib2_GCATGATTCTGAGAGG-1	-2.75169	-6.37766
lib2_GCCAGGTAGTGTTGTC-1	1.51898	10.6596
lib2_GCCAGGTCAGTAGGAC-1	-4.88432	-5.47818
lib2_GCCTGTTTCGGAATGG-1	-5.7	-4.83527
lib2_GCTCAAACACAGAGAC-1	1.56487	11.2408
lib2_GCTTGGGTCAGCAATC-1	1.41679	11.7461
lib2_GGACGTCTCAGCGCGT-1	13.3226	-2.13749
lib2_GGAGAACGTAGGTTTC-1	-5.48313	-4.69274
lib2_GGAGATGCACAAGCAG-1	-4.18539	-6.23985
lib2_GGAGGATGTAGGTAGC-1	1.23032	10.9631
lib2_GGCACGTGTTTGACAC-1	-3.82195	-4.66366
lib2_GGCAGTCGTAGATCCT-1	-4.00972	-0.804744
lib2_GGCTTGGTCAGGAGAC-1	-2.27331	-4.84196
lib2_GGGATCCCATCGAACT-1	13.5963	-1.62269
lib2_GGGATGAGTTTGGGAG-1	-4.25192	-5.55835
lib2_GGGCCATTCATAGCAC-1	-1.83097	12.1702
lib2_GGGCGTTAGACGACGT-1	-3.33271	-4.19541
lib2_GGGCTACAGCCATATC-1	-3.72983	-5.48237
lib2_GGGTATTCACACCTTC-1	1.51524	11.6438
lib2_GGGTTATAGAGCAGAA-1	1.78602	10.4973
lib2_GGTAACTAGATCCTAC-1	-13.6328	3.14841
lib2_GGTAATCAGTAAATGC-1	13.9337	-1.28535
lib2_GGTAGAGCATAGTCAC-1	1.63475	11.1931
lib2_GGTGATTTCCGAAGGA-1	-5.25315	-4.89496
lib2_GTACAGTGTTGCGGCT-1	-4.20892	-5.40176
lib2_GTACAGTTCCACGTGG-1	-4.13399	-5.45557
lib2_GTAGATCAGGTGGGTT-1	-5.48375	-3.75557
lib2_GTAGATCCAACTCCAA-1	-0.0300677	-5.54475
lib2_GTAGATCTCTAGAGCT-1	-5.40659	-4.72181
lib2_GTCAAGTAGGCGAACT-1	13.1702	-1.46689
lib2_GTCACTCAGCCATTGT-1	1.47496	11.5433
lib2_GTCACTCCACCCTCTA-1	-4.81547	-2.88094
lib2_GTCCACTCATCCCACT-1	-6.01429	-4.12131
lib2_GTCCCATCAAGCCCAC-1	11.7858	-1.51639
lib2_GTCGTTCAGAACGTGC-1	1.59261	11.2305
lib2_GTGACGCGTCTCCTGT-1	-4.52077	-5.11515
lib2_GTGAGGATCGCACTCT-1	-4.29233	-5.55148
lib2_GTGCGTGGTTAATCGC-1	11.7297	-1.98239
lib2_GTGCTTCAGTTCTACG-1	-1.34272	-5.21385
lib2_GTGCTTCGTTCCAAAC-1	1.34047	10.7433
lib2_GTGGAGATCCGATCTC-1	-4.52626	-3.64642
lib2_GTGGGAAGTTCGGGTC-1	1.39592	11.9885
lib2_GTGTTAGCACTGGCCA-1	-5.31238	-4.09635
lib2_GTTAGACGTAGGCTGA-1	-0.302424	-6.09253
lib2_GTTCTATCATCTCGTC-1	14.1981	-1.47385
lib2_GTTGCGGGTTCCGTTC-1	-2.10262	11.1898
lib2_GTTGTAGTCTACACAG-1	-3.29511	-3.79641
lib2_GTTTACTAGTTGGCTT-1	-6.16575	-5.06664
lib2_TAACCAGTCTCAACGA-1	-5.00987	-3.57052
lib2_TAAGCACGTAGGCAAC-1	-2.88508	-4.78018
lib2_TAAGCACGTGTCATCA-1	-4.18884	-6.03757
lib2_TAATCTCCAAACACCT-1	-4.21656	-0.891181
lib2_TACATTCCAGCGAGTA-1	-4.60206	-4.00717
lib2_TACCCGTTCCAACTGA-1	-2.18279	-6.07803
lib2_TACTTACCACGCTGTG-1	-4.99281	-4.66842
lib2_TAGATCGGTACTCGAT-1	-5.91413	-4.18575
lib2_TATACCTCATTGCCTC-1	-5.22281	-3.31038
lib2_TATCTTGTCCATTGCC-1	-2.49023	-6.7773
lib2_TATTCCAAGAGTGACC-1	-5.13412	-4.17633
[truncated: 1,160 more rows]

## Sheet: TSNE
Cell	tSNE_1	tSNE_2
lib230524_AAACCCAGTTCTTGCC-1	12.5689	-2.8344
lib230524_AAACGAAAGTAGGGTC-1	-4.3345	36.1488
lib230524_AAACGAAGTTAATGAG-1	-14.4816	25.86
lib230524_AAACGAATCCATCTCG-1	-2.31	21.9133
lib230524_AAACGAATCTTGATTC-1	1.66446	33.0286
lib230524_AAAGAACAGCGTACAG-1	-31.6909	12.4711
lib230524_AAAGGGCCACAGCTTA-1	-17.3976	12.2109
lib230524_AAAGGGCCACCTGCAG-1	14.4225	6.22402
lib230524_AAAGGGCCAGCTGAAG-1	-3.45282	19.2211
lib230524_AAAGGGCCAGTAGTTC-1	8.58688	12.9203
lib230524_AAAGGGCGTGAGATCG-1	-22.6156	29.7653
lib230524_AAAGGGCGTTAACCTG-1	-2.57518	15.0745
lib230524_AAAGTCCGTCTGATCA-1	16.5756	-3.58715
lib230524_AACAAGACAGGTTACT-1	-16.3701	23.8021
lib230524_AACACACCAGACCGCT-1	-4.79776	19.8009
lib230524_AACCAACCAGGTATGG-1	-8.152	20.288
lib230524_AACCAACGTTGTGGCC-1	10.4649	10.6116
lib230524_AACCAACTCCTACTGC-1	-18.0715	28.3791
lib230524_AACCATGCAGGGTCTC-1	0.647616	37.5278
lib230524_AACCCAAGTAGATGTA-1	-4.40797	20.6121
lib230524_AACCCAATCTACACAG-1	1.1252	37.2972
lib230524_AACCTTTAGAGTCAGC-1	-7.73898	-0.962382
lib230524_AACGAAAAGTGAGTTA-1	9.16763	2.21538
lib230524_AACGTCAGTCGATGCC-1	28.2639	1.99279
lib230524_AACTTCTAGCCGTCGT-1	8.48088	9.16355
lib230524_AACTTCTTCACCTCGT-1	20.3607	6.53856
lib230524_AAGACAATCCTCCACA-1	26.2716	1.14065
lib230524_AAGATAGGTTCCTACC-1	-13.3482	22.3884
lib230524_AAGCCATTCACCATGA-1	-19.2533	10.9252
lib230524_AAGCGTTTCCAACTAG-1	25.8164	1.50117
lib230524_AAGGAATGTACGATCT-1	-13.709	16.2127
lib230524_AAGGTAAAGGGAGAAT-1	6.7333	7.68806
lib230524_AAGGTAAGTAACATCC-1	2.61988	2.56886
lib230524_AAGGTAAGTCTCTCTG-1	-45.4173	0.517351
lib230524_AAGTACCCAATTGCGT-1	2.66587	36.2659
lib230524_AAGTACCTCCCGTTGT-1	5.67414	21.6761
lib230524_AAGTCGTAGACGCATG-1	-24.221	-1.88101
lib230524_AAGTTCGAGCATACTC-1	15.8028	-4.96497
lib230524_AATAGAGGTAGCTAAA-1	-20.5814	30.8541
lib230524_AATCGACCATACTGAC-1	-31.7462	13.0058
lib230524_AATCGTGTCCACACAA-1	-0.489859	33.273
lib230524_AATGAAGAGAAGGATG-1	9.11048	5.8451
lib230524_AATGAAGGTACTAAGA-1	4.30943	-0.791545
lib230524_AATGACCGTCGCCACA-1	-11.946	-20.1365
lib230524_AATGGAAAGGTAAGAG-1	28.2296	-0.59711
lib230524_AATGGAAAGGTTACCT-1	3.17047	34.0571
lib230524_AATGGAACAACTTGCA-1	-7.38598	32.9912
lib230524_AATGGCTTCCGTGGCA-1	-19.7146	28.381
lib230524_AATTCCTAGACATATG-1	-22.0899	28.7835
lib230524_ACAAGCTAGCCAAGTG-1	14.1635	-7.37039
lib230524_ACACGCGTCTTTCCAA-1	0.581581	-1.98308
lib230524_ACAGCCGGTAGGTTTC-1	-12.992	-8.61262
lib230524_ACAGCCGGTCAAAGAT-1	-6.54148	-16.7214
lib230524_ACAGCCGTCGGATTAC-1	4.07389	9.24386
lib230524_ACATCCCAGTTCAACC-1	-44.0312	0.284036
lib230524_ACATCCCCACCGGAAA-1	7.04361	23.6361
lib230524_ACATTTCGTCAACCTA-1	17.8124	8.08079
lib230524_ACCAAACCAACCAACT-1	-13.6372	16.0825
lib230524_ACCAAACTCTCAACCC-1	19.9361	8.76597
lib230524_ACCATTTAGAAACTGT-1	-10.1244	-7.14674
lib230524_ACCATTTCATGGGAAC-1	-1.47559	18.3875
lib230524_ACCCAAACAACGGTAG-1	-9.44835	18.3563
lib230524_ACCCTCACAGCGACCT-1	-4.77879	33.7121
lib230524_ACCCTCATCGCGTAGC-1	-14.3022	19.9218
lib230524_ACCTGAACAAGTTGGG-1	25.5113	-4.34791
lib230524_ACGGTCGTCGAAACAA-1	-4.06233	35.1537
lib230524_ACGGTTAGTGAATATG-1	3.86825	35.9976
lib230524_ACGTAACGTTGAATCC-1	-6.27505	28.2112
lib230524_ACGTAACTCATTCGGA-1	27.3491	-3.99921
lib230524_ACGTAACTCGCGCTGA-1	-31.67	12.2339
lib230524_ACGTACAAGGCACTAG-1	10.5832	-11.5426
lib230524_ACGTACACAGTCTCTC-1	-6.75102	31.2081
lib230524_ACGTACAGTTCCAGGC-1	12.6519	12.4618
lib230524_ACGTTCCGTATGGTTC-1	-13.3231	-10.0562
lib230524_ACGTTCCTCATTGTTC-1	20.3141	5.8359
lib230524_ACTACGACAATTTCCT-1	12.0086	-10.5095
lib230524_ACTACGACACTACAGT-1	14.511	9.41169
lib230524_ACTATGGCAGAAGCTG-1	22.1911	1.79281
lib230524_ACTATTCCACTCCACT-1	-38.6875	-10.2174
lib230524_ACTATTCGTGGGATTG-1	-18.6482	29.2114
lib230524_ACTATTCGTTATAGCC-1	-37.7721	-8.33221
lib230524_ACTATTCTCTGGCTGG-1	2.15905	37.4304
lib230524_ACTGATGCACGTTGGC-1	-29.6942	6.91128
lib230524_ACTGCAACATCTATCT-1	51.0328	-2.42028
lib230524_ACTGTGAAGTTGGACG-1	-3.40917	38.3187
lib230524_ACTTAGGCATCTCAAG-1	1.24721	32.657
lib230524_ACTTAGGGTAGATCCT-1	-22.21	-1.61884
lib230524_ACTTAGGGTTCTAAGC-1	-3.60001	34.574
lib230524_ACTTCCGAGCGACTGA-1	6.28454	10.0512
lib230524_ACTTCGCAGCCTCTTC-1	2.85236	35.9895
lib230524_ACTTCGCGTGTTCATG-1	-3.98857	36.2655
lib230524_ACTTTCACAATTGCTG-1	12.9567	6.97342
lib230524_ACTTTGTAGAAAGCGA-1	-6.15719	28.2572
lib230524_AGAAATGAGCTGACAG-1	-0.649502	27.8293
lib230524_AGAAATGCAGCTGTGC-1	-0.874709	21.1648
lib230524_AGAAATGGTGGAGAAA-1	1.94392	8.73497
lib230524_AGAACAAAGACGAAGA-1	16.4279	0.116191
lib230524_AGAACAACATTGTAGC-1	-3.27605	36.2275
lib230524_AGAACAAGTGTACAGG-1	-31.3239	11.2589
lib230524_AGAAGCGCACCGTCGA-1	14.2788	6.20259
lib230524_AGACAAATCTTCCAGC-1	-14.1404	-9.08847
lib230524_AGACTCAAGAAGGGAT-1	10.5952	-6.75177
lib230524_AGACTCACATCTTCGC-1	-19.2691	-23.0288
lib230524_AGAGAATGTTCTCTAT-1	-21.6403	24.6182
lib230524_AGAGCAGCAGGTTTAC-1	4.20476	10.4798
lib230524_AGAGCCCAGCTACTAC-1	-6.53703	28.7956
lib230524_AGAGCCCCACATGGTT-1	14.137	-7.53899
lib230524_AGATAGAAGACCATAA-1	-21.428	27.0154
lib230524_AGATAGAAGCACTAAA-1	-21.5787	29.517
lib230524_AGATAGAGTGTCATTG-1	-15.4935	15.8399
lib230524_AGATGAACAACTACGT-1	-0.185306	25.1047
lib230524_AGCCAATAGGTAGGCT-1	-0.601265	37.7253
lib230524_AGCCACGAGGATACGC-1	10.7796	5.51811
lib230524_AGCCACGTCAGGACGA-1	-31.7115	9.76638
lib230524_AGCGCTGTCTACCTTA-1	24.5917	-0.182861
lib230524_AGCTACAGTAGCTGAG-1	-20.91	22.2661
lib230524_AGCTACAGTGATTCTG-1	27.4554	-4.63922
lib230524_AGCTCAACAAGTGGAC-1	-13.3276	-8.55766
lib230524_AGCTTCCCACATACGT-1	-3.59276	-1.12775
lib230524_AGGAAATCACCGTACG-1	-3.70856	22.9904
lib230524_AGGACTTGTCTGTGAT-1	14.6508	9.0976
lib230524_AGGACTTTCAATCTTC-1	5.35429	23.2757
lib230524_AGGAGGTGTATACCTG-1	-5.73173	-14.0606
lib230524_AGGAGGTGTCTAGATC-1	-10.706	-7.26276
lib230524_AGGAGGTTCGTGAGAG-1	14.1207	3.67717
lib230524_AGGATAAGTCTAACGT-1	-4.11161	36.1618
lib230524_AGGATCTGTATGAGAT-1	-6.44534	-13.327
lib230524_AGGCATTGTCCGTTTC-1	-12.7027	18.1808
lib230524_AGGCATTTCACTACGA-1	-16.8909	12.2748
lib230524_AGGCATTTCGGCATCG-1	-1.41977	38.1172
lib230524_AGGCCACGTTGGAGAC-1	-16.2651	19.2757
lib230524_AGGCCACTCTGCGTCT-1	-2.44136	34.2469
lib230524_AGGCTGCCACTGGCCA-1	12.5819	-8.22305
lib230524_AGGCTGCGTTGGCCTG-1	-20.483	23.2229
lib230524_AGGGAGTAGCCGTTAT-1	10.9433	12.4781
lib230524_AGGGCCTAGTAGCTCT-1	-22.3357	-2.56602
lib230524_AGGGTCCGTAGGAGTC-1	-5.83832	36.0389
lib230524_AGGGTTTCATCTCGTC-1	5.00716	23.7888
lib230524_AGGGTTTGTATGGTTC-1	-16.6694	12.3579
lib230524_AGGTCATAGCTTCTAG-1	-10.6339	-7.1887
lib230524_AGGTCATAGGTTCACT-1	-21.7241	29.629
lib230524_AGGTCTAAGGGCTAAC-1	10.6449	-3.85608
lib230524_AGGTGTTGTTCGGACC-1	3.5458	5.92851
lib230524_AGGTGTTTCGTTCTGC-1	1.86159	21.6616
lib230524_AGGTTACTCCGCAGTG-1	-39.7421	-5.68189
lib230524_AGTACCAAGAGGTTAT-1	5.64861	6.77494
lib230524_AGTACCAAGGTGCCAA-1	3.50389	35.6369
lib230524_AGTACCACACTGTTCC-1	2.7063	24.1808
lib230524_AGTACCACATAGGAGC-1	-16.4308	22.6159
lib230524_AGTACTGTCGGAGTGA-1	4.50371	0.319155
lib230524_AGTAGCTTCTCATAGG-1	-13.2764	20.7765
lib230524_AGTAGCTTCTGAACGT-1	-0.0196014	22.9446
lib230524_AGTAGTCCATATACCG-1	-7.29525	24.0986
lib230524_AGTCAACAGCCGGAAT-1	-41.553	-3.24708
lib230524_AGTCACACAAGCTGCC-1	-0.960775	38.6585
lib230524_AGTCTCCGTAATGATG-1	3.77985	11.9751
lib230524_AGTCTCCGTCACTCTC-1	4.72671	35.7855
lib230524_AGTCTCCTCGGATACT-1	3.94565	35.3858
lib230524_AGTGACTTCTGAATCG-1	-39.6517	-7.39784
lib230524_AGTGTTGCACAAAGTA-1	-6.47373	-27.5602
lib230524_AGTTAGCCAATTTCTC-1	9.70251	2.39812
lib230524_ATACCTTAGTTACGGG-1	-6.99258	21.2076
lib230524_ATACTTCTCTCGTCAC-1	-21.387	20.8769
lib230524_ATCACTTTCCTTACCG-1	11.2199	-15.9855
lib230524_ATCAGGTAGATGCTTC-1	12.2294	12.7589
lib230524_ATCAGGTGTTTGGAGG-1	29.2714	-2.51385
lib230524_ATCATTCCAACGCATT-1	-7.66985	20.8781
lib230524_ATCATTCGTTGCCGAC-1	-22.3022	21.1896
lib230524_ATCCACCCATGTAACC-1	-4.07555	19.0996
lib230524_ATCCACCTCCATTTGT-1	-10.1524	-7.62083
lib230524_ATCCATTTCGTGGGTC-1	-22.925	21.3145
lib230524_ATCCATTTCTCCGCAT-1	1.96249	32.2223
lib230524_ATCCCTGAGCCTCTCT-1	1.34178	32.0422
lib230524_ATCCCTGAGCGTGTCC-1	-17.6458	10.845
lib230524_ATCCCTGCACACAGCC-1	-8.94395	21.9399
lib230524_ATCCCTGTCAAATGCC-1	-13.0336	18.5
lib230524_ATCCCTGTCCGTGTAA-1	-8.59278	-0.722513
lib230524_ATCCTATCAGAACTTC-1	-1.62104	38.3459
lib230524_ATCCTATCAGCAAGAC-1	5.47503	-10.0904
lib230524_ATCCTATCATAGAGGC-1	6.17786	22.109
lib230524_ATCGCCTAGTCGCGAA-1	-1.28922	36.7471
lib230524_ATCGCCTTCTCGTTTA-1	-31.7625	9.43708
lib230524_ATCGGATCAAATTGGA-1	27.7226	2.0788
lib230524_ATCGGATGTGGACTAG-1	-6.84043	-22.3887
lib230524_ATCGGATTCCACGTAA-1	11.1238	0.262802
lib230524_ATCGTAGAGCTTTGTG-1	0.617282	24.0605
lib230524_ATCGTCCCACATATGC-1	-21.7695	25.3937
lib230524_ATCTCTAAGCCTCACG-1	2.53353	36.7803
lib230524_ATCTCTAGTGAATGTA-1	-1.51096	34.895
lib230524_ATCTCTATCTTGGAAC-1	-19.4563	31.4092
lib230524_ATGACCACACTCGATA-1	-24.1244	-2.21042
lib230524_ATGCCTCTCAGCTCTC-1	2.47975	33.1894
lib230524_ATGCGATCATGGGTCC-1	-10.1568	-7.35985
lib230524_ATGGATCAGGTTATAG-1	8.46907	8.73704
lib230524_ATGGATCGTTCGGCTG-1	-15.5352	15.9749
lib230524_ATGGGTTTCACCGGTG-1	10.8435	12.5714
lib230524_ATGTCCCCAGCTTTCC-1	-17.471	19.0955
lib230524_ATGTCTTCACCTATCC-1	14.5182	-5.42204
lib230524_ATGTCTTTCAGCTTGA-1	11.2962	8.96271
lib230524_ATGTCTTTCTGTAAGC-1	-1.60466	35.9664
lib230524_ATTACCTGTTGTGTAC-1	-11.2843	17.9545
lib230524_ATTACTCTCTGCGAGC-1	-16.0365	26.972
lib230524_ATTATCCTCTGGAGAG-1	-0.0293609	36.5175
lib230524_ATTCACTCACGGGTAA-1	-0.439277	32.9752
lib230524_ATTCAGGCATTCTGTT-1	-7.42598	-22.4001
lib230524_ATTCCATTCCGTTTCG-1	19.4644	-11.8763
lib230524_ATTCCCGTCCTAGAGT-1	-9.49611	-17.721
lib230524_ATTGGGTAGCATCGAG-1	27.9405	-7.90121
lib230524_ATTGGGTTCTAATTCC-1	22.7744	-4.59179
lib230524_ATTGTTCCACCGTGCA-1	-32.3355	9.38091
lib230524_CAAAGAAAGGAATGTT-1	-15.6452	20.9594
lib230524_CAACAACCAGGTATGG-1	28.6071	-6.97451
lib230524_CAACAACTCTTCGTAT-1	3.25618	36.226
lib230524_CAACCTCTCCCATTCG-1	15.5644	-4.77486
lib230524_CAACGATAGCACACAG-1	-32.0526	12.0099
lib230524_CAACGATAGTAACCTC-1	12.7349	6.77819
lib230524_CAAGGGAAGGACTAAT-1	-23.4264	-2.59808
lib230524_CAATCGAGTAGGACTG-1	-13.3476	-20.5823
lib230524_CAATGACTCATGCGGC-1	-0.379848	35.4502
lib230524_CAATTTCTCTGACAGT-1	28.5721	-2.14534
lib230524_CACATGAGTGTGGTCC-1	-17.637	-1.85153
lib230524_CACCGTTAGGTGCCAA-1	-32.0452	10.275
lib230524_CACGAATGTTGGGTAG-1	1.28785	34.9361
lib230524_CACGAATTCTGCGATA-1	13.1658	8.09441
lib230524_CACGTGGAGAAATCCA-1	-20.1633	31.0315
lib230524_CACGTGGCAGGCTCTG-1	0.993341	33.9204
lib230524_CACGTGGTCTGTCGCT-1	4.11443	8.99988
lib230524_CACGTTCAGCCAAGTG-1	-13.0862	4.30878
lib230524_CACTGGGGTCCACTTC-1	10.9207	12.5247
lib230524_CACTTCGAGCCGCACT-1	16.8063	-17.6234
lib230524_CAGAGCCCAGTCCCGA-1	-15.8394	12.9383
lib230524_CAGAGCCTCGAACACT-1	-9.81426	-22.7957
lib230524_CAGATTGCACTGTCCT-1	-22.7182	22.4258
lib230524_CAGATTGTCACCTCAC-1	9.96339	10.0043
lib230524_CAGCAATAGATTGATG-1	28.4392	-1.61128
lib230524_CAGCCAGCATGACTGT-1	-2.82222	33.2682
lib230524_CAGCGTGCATACGCAT-1	-4.25287	25.3165
lib230524_CAGGCCATCCTATTTG-1	-25.5201	-4.49324
lib230524_CAGGGCTAGGACTAAT-1	28.6271	-1.84692
lib230524_CAGGGCTCACAGCCAC-1	1.48051	34.8186
lib230524_CAGTGCGTCAGTGGGA-1	-20.1214	29.3243
lib230524_CATAAGCAGGTTGGAC-1	0.029599	35.1074
lib230524_CATACAGCACCCAATA-1	-7.41369	-14.1773
lib230524_CATACCCGTCATCGGC-1	-37.7869	-8.02613
lib230524_CATACCCTCTCCGAGG-1	14.8971	5.11591
lib230524_CATAGACGTCCCACGA-1	-44.2834	-1.59865
lib230524_CATCAAGCAACCAGAG-1	0.830437	34.776
lib230524_CATCAAGCATGTGGTT-1	-16.7609	12.002
lib230524_CATCCACCATCATCTT-1	24.7569	-7.75043
lib230524_CATCCACGTGAGGATC-1	-21.3495	24.6636
lib230524_CATCCACTCCTTGGAA-1	26.6343	-5.19937
lib230524_CATCCGTGTCGTACAT-1	8.73584	23.5276
lib230524_CATCCGTTCTCGGTCT-1	-31.8819	11.809
lib230524_CATCGCTTCATTTGTC-1	-31.5458	9.10811
lib230524_CATCGTCGTCTGGTTA-1	21.6232	-3.78618
lib230524_CATCGTCTCTGATTCT-1	-21.9609	29.7264
lib230524_CATGCGGAGAGCAGTC-1	-2.78069	35.7754
lib230524_CATGCTCCACAACGAG-1	23.5542	0.397967
lib230524_CATGCTCCAGGTTTAC-1	6.72783	22.155
lib230524_CATGCTCCATGCACTA-1	8.14822	23.2828
lib230524_CATTCATCATGACTTG-1	0.426263	33.6929
lib230524_CATTCATTCACCGGGT-1	-32.4901	9.75204
lib230524_CATTCCGAGCGCCCAT-1	-15.8642	30.3318
lib230524_CATTCCGCAATTTCTC-1	-23.0527	-1.93706
lib230524_CATTCCGTCGCAGTTA-1	-3.59523	23.2583
lib230524_CATTGAGCAATTCTCT-1	-8.34499	8.08021
lib230524_CATTGAGGTCCAGCAC-1	26.0047	-5.67802
lib230524_CATTGAGTCATTGCCC-1	0.947899	20.1264
lib230524_CATTGCCAGACTGGGT-1	-23.076	-2.02895
lib230524_CATTGCCTCTAGACCA-1	-21.2863	24.1574
lib230524_CATTTCACACTGGCGT-1	-10.2582	-8.16352
lib230524_CCAATTTTCAGCCCAG-1	-9.43354	-8.51096
lib230524_CCAATTTTCAGTGTTG-1	10.5413	10.6044
lib230524_CCACAAATCTAGTTCT-1	-21.9271	24.7164
lib230524_CCACCATTCCACTGGG-1	4.41361	7.19516
lib230524_CCACGTTGTCGCGGTT-1	-7.63991	-0.734011
lib230524_CCACGTTGTGCACAAG-1	-3.88271	33.9049
lib230524_CCACTTGAGTATCCTG-1	13.202	8.23281
lib230524_CCATAAGCATTCAGCA-1	-1.03522	33.9584
lib230524_CCATCACGTCTGTGAT-1	23.748	1.97413
lib230524_CCCATTGAGTGCCAGA-1	12.5852	11.8453
lib230524_CCCGAAGAGTCACTAC-1	-1.43617	34.6439
lib230524_CCCGAAGCATAACTCG-1	-30.6746	6.74322
lib230524_CCCGAAGTCATCAGTG-1	-4.9107	-16.4956
lib230524_CCCGGAAGTCATTGCA-1	-1.36158	-23.7104
lib230524_CCCTAACGTGCTCTTC-1	24.6708	-10.1945
lib230524_CCCTAACGTTTGGCTA-1	-30.676	7.59267
lib230524_CCCTCTCAGCAGTACG-1	-3.16195	0.691019
lib230524_CCCTCTCAGCATCGAG-1	-7.22029	-14.6111
lib230524_CCCTCTCAGCCGTTAT-1	-19.3082	31.2734
lib230524_CCCTCTCCAAGTTTGC-1	-17.7499	19.5645
lib230524_CCCTCTCGTACGCGTC-1	-11.7057	-6.9275
lib230524_CCCTCTCTCGAGATAA-1	10.3804	-11.3712
lib230524_CCCTGATAGACAGCGT-1	2.59606	23.0034
lib230524_CCCTGATCAACAGATA-1	-2.16161	21.6717
lib230524_CCCTGATCATACCACA-1	-12.7705	18.0804
lib230524_CCGATGGCAAATCAGA-1	-8.70966	17.8465
lib230524_CCGATGGTCCGATAGT-1	29.5198	-4.67537
lib230524_CCGCAAGGTATGCTAC-1	-21.0714	22.5829
lib230524_CCGGTAGTCTGGAGAG-1	-1.51301	34.3424
lib230524_CCGTAGGCAGAGAGGG-1	-4.51575	35.7021
lib230524_CCGTTCAGTAGACAGC-1	-1.27983	23.1146
lib230524_CCTAACCGTGAATAAC-1	-15.9708	30.2854
lib230524_CCTAAGACAGAGTCTT-1	-24.8927	-2.159
lib230524_CCTACGTTCGCCTATC-1	8.78709	23.7719
lib230524_CCTATCGCACTGAGGA-1	-13.9785	-10.2011
lib230524_CCTATCGCAGGTGAGT-1	24.1456	1.54014
lib230524_CCTCAACAGCTCAGAG-1	-6.66383	31.0572
lib230524_CCTCCAAGTGCCCAGT-1	-17.0413	19.3807
lib230524_CCTCCAATCTGTAACG-1	1.11921	32.9819
lib230524_CCTCCTCCAAATGATG-1	-4.69236	-20.41
lib230524_CCTCTCCGTCCTATAG-1	6.63585	-16.4573
lib230524_CCTGCATCAAGTCATC-1	-17.9034	19.5836
lib230524_CCTGCATCACACTGGC-1	-9.48058	-19.3626
lib230524_CCTGTTGCATGTGACT-1	11.7421	11.4968
lib230524_CCTTGTGCATTGTAGC-1	17.8229	6.08208
lib230524_CCTTGTGGTGTGAGCA-1	-19.9989	17.9748
lib230524_CGAAGGAAGCTAATGA-1	14.4275	3.24393
lib230524_CGAAGGAAGGCTGGAT-1	-5.16465	19.0205
lib230524_CGAAGGATCCCTGGTT-1	-11.377	11.2857
lib230524_CGAAGTTCATTCGATG-1	10.7105	10.8583
lib230524_CGAGAAGGTTTATGCG-1	12.1453	-1.13957
lib230524_CGAGTTACATCAACCA-1	-1.97635	38.1523
lib230524_CGAGTTACATGTGGTT-1	19.8692	-0.828505
lib230524_CGAGTTAGTCGGTGAA-1	-5.0147	20.9469
lib230524_CGATCGGAGCACCGTC-1	-25.2981	-4.48164
lib230524_CGATCGGCAGCTTTGA-1	-10.4592	-7.23001
lib230524_CGATCGGGTAGGCTGA-1	-19.5403	28.6587
lib230524_CGCAGGTAGACGGAAA-1	-14.8017	17.7878
lib230524_CGCATAAAGTGTTCCA-1	3.20219	7.10719
lib230524_CGCCAGACATGAGGGT-1	6.8666	22.1846
lib230524_CGCCAGATCACTCTTA-1	-2.79954	14.963
lib230524_CGGAATTCAAACGGCA-1	-2.81605	35.8854
lib230524_CGGACACAGGTATCTC-1	-11.1374	19.0967
lib230524_CGGCAGTTCCCAAGCG-1	1.0035	23.023
lib230524_CGGGCATAGCCTTTGA-1	-2.58197	-13.8592
lib230524_CGGGCATCACTAGAGG-1	28.3016	-3.23103
lib230524_CGGGCATGTAGTGCGA-1	25.3336	-11.3063
lib230524_CGGGCATTCTGGTCAA-1	-2.26791	34.6049
lib230524_CGTAATGCAATAGTGA-1	0.643659	9.25884
lib230524_CGTAATGTCTAACACG-1	1.79506	37.5675
lib230524_CGTAATGTCTTGTGCC-1	5.25483	-0.2038
lib230524_CGTAGTATCAATCTTC-1	-0.851627	19.4307
lib230524_CGTAGTATCACTACGA-1	-10.5045	19.9951
lib230524_CGTGATAAGTGGACTG-1	-15.5113	23.0406
lib230524_CGTGATAGTCGCGTTG-1	8.54892	0.918471
lib230524_CGTTAGAAGAGAGCAA-1	2.39899	28.5711
lib230524_CGTTCTGCATGGCACC-1	11.207	7.67989
lib230524_CGTTGGGAGGTATAGT-1	0.350842	33.559
lib230524_CGTTGGGGTTCTCACC-1	-15.9663	20.4348
lib230524_CTAACCCCAATTTCTC-1	-40.2292	-6.40693
lib230524_CTAACCCCATGACTGT-1	-0.497832	8.64311
lib230524_CTAACTTCAGGTTTAC-1	6.68772	7.56638
lib230524_CTAACTTGTAGCCCTG-1	8.04156	10.9329
lib230524_CTAACTTGTGGGCTTC-1	-13.373	22.3585
lib230524_CTAAGTGAGAAATGGG-1	3.17587	8.10877
lib230524_CTAAGTGGTTAAGCAA-1	-17.6039	26.1058
lib230524_CTACATTAGATGTTGA-1	-25.5022	-2.19683
lib230524_CTAGACAGTGCCTATA-1	19.372	-13.3227
lib230524_CTAGGTAGTATGGTTC-1	-0.861896	35.7654
lib230524_CTATAGGAGTTACGTC-1	-2.90288	-0.316246
lib230524_CTATAGGTCTATCGCC-1	6.08689	21.8759
lib230524_CTATCCGAGCCATTGT-1	-6.93963	28.9
lib230524_CTATCCGAGGTCGTCC-1	48.5674	-3.27135
lib230524_CTATCTAAGTCATGGG-1	3.89268	31.8799
lib230524_CTATCTAGTGGATTTC-1	2.17721	28.3896
lib230524_CTCAACCAGTTCTCTT-1	2.08835	19.908
lib230524_CTCAACCTCATTGAGC-1	1.40147	22.6232
lib230524_CTCAAGACAAGCCTGC-1	8.32952	-13.6439
lib230524_CTCAAGACAATGCAGG-1	-2.95304	35.6405
lib230524_CTCAATTCAAAGACTA-1	6.1525	21.089
lib230524_CTCACTGAGGAGAGGC-1	4.26251	0.452329
lib230524_CTCACTGGTGGCTGAA-1	25.0243	-7.43666
lib230524_CTCAGAAAGGAATCGC-1	-1.06331	25.2732
lib230524_CTCAGAACAGATACTC-1	4.44795	-17.0125
lib230524_CTCAGAACATCAACCA-1	-12.4602	-21.0933
lib230524_CTCAGTCAGGTCCGAA-1	-44.919	-0.543499
lib230524_CTCATCGAGGCTTAGG-1	5.73844	-4.48493
lib230524_CTCATGCTCCAGCACG-1	5.43001	21.4644
lib230524_CTCATTACAGCGTTTA-1	-20.7423	18.8081
lib230524_CTCATTATCCGCAGTG-1	-16.432	22.631
lib230524_CTCCAACTCGTGAGAG-1	0.417433	-3.62749
lib230524_CTCCACAGTAAGATCA-1	-18.7833	-23.1074
lib230524_CTCCCTCAGCGATCGA-1	-19.7421	11.1763
lib230524_CTCCCTCAGTTAGTAG-1	-30.7917	6.84712
lib230524_CTCCGATAGAAGTCCG-1	-12.4552	18.3533
lib230524_CTCCTTTAGATCCTAC-1	-2.53934	35.5391
lib230524_CTCCTTTAGTCATCGT-1	-17.8677	21.9233
lib230524_CTCTCAGGTCAACACT-1	-9.42616	-27.7542
lib230524_CTCTCAGTCCAAGCAT-1	3.6399	-18.5666
lib230524_CTCTCAGTCGACATCA-1	-7.48286	-13.7887
lib230524_CTCTCGACAAAGGATT-1	-0.269386	37.6864
lib230524_CTCTCGAGTATTTCGG-1	-12.5958	-12.3901
lib230524_CTCTGGTTCATTCATC-1	5.97049	21.6412
lib230524_CTCTGGTTCCGAGATT-1	-17.6648	19.3423
lib230524_CTGAATGTCGACGAGA-1	0.157312	20.679
lib230524_CTGAATGTCTACTTCA-1	5.21857	21.2856
lib230524_CTGAGCGAGAGTGTTA-1	-1.11188	23.7201
lib230524_CTGCAGGTCGCGCTGA-1	-29.8975	7.11261
lib230524_CTGCAGGTCTAGCCAA-1	1.09302	34.3459
lib230524_CTGCATCAGGGTCTTT-1	-20.6951	21.7158
lib230524_CTGCATCCAGAACTAA-1	22.8459	0.0647899
lib230524_CTGCCTATCACGTAGT-1	-15.7821	15.0913
lib230524_CTGCGAGGTGCTGATT-1	-3.0061	22.0482
lib230524_CTGCTCACAGCTCTGG-1	5.23719	11.2699
lib230524_CTGGCAGCAACCGCTG-1	5.66476	22.53
lib230524_CTGGTCTAGTGATTCC-1	-31.8201	9.68179
lib230524_CTGGTCTTCAAGAGTA-1	21.2762	-14.8268
lib230524_CTGGTCTTCGGCGATC-1	21.5933	5.10663
lib230524_CTGGTCTTCTACTATC-1	-26.7069	-2.89262
lib230524_CTGTACCAGACTTAAG-1	-18.0838	25.8639
lib230524_CTGTAGACACTGATTG-1	23.1649	-5.56295
lib230524_CTGTGAAAGCCTCTCT-1	-7.78498	-1.53095
lib230524_CTGTGAACAGGCCTGT-1	50.3463	-2.70273
lib230524_CTGTGAAGTAGTGCGA-1	-12.8164	-20.5383
lib230524_CTTACCGAGATACATG-1	-45.7559	0.295984
lib230524_CTTCAATCAACACTAC-1	-20.3358	31.0808
lib230524_CTTCAATGTCGCTTAA-1	-46.0025	0.551827
lib230524_CTTCAATGTCTGTGAT-1	-17.0553	11.8019
lib230524_CTTCCGAAGTTGCCTA-1	-17.9977	11.4097
lib230524_CTTCCGAGTTCTCCAC-1	-3.54672	-17.9923
lib230524_CTTCCTTGTCCCAAAT-1	-0.457788	33.0593
lib230524_CTTCGGTGTGTTAGCT-1	2.58798	31.4048
lib230524_CTTCTCTGTTTATGCG-1	16.6529	6.31057
lib230524_CTTCTCTTCACGACTA-1	-18.3609	21.9476
lib230524_CTTGATTAGCCTCTGG-1	9.96453	-3.53542
lib230524_CTTGATTGTTAGAAGT-1	-5.98271	-13.6752
lib230524_CTTTCAAAGTAACCTC-1	4.77967	20.3118
lib230524_GAAGAATAGAGGTCGT-1	15.8131	-2.72731
lib230524_GAAGAATTCCAAATGC-1	13.0073	10.4979
lib230524_GAAGAATTCCCTATTA-1	-16.9431	26.531
lib230524_GAAGAATTCTCGTCGT-1	4.09992	20.8575
lib230524_GAAGCCCGTCGCTTGG-1	3.39301	7.28597
lib230524_GAAGCGAGTAGCTCGC-1	-14.2497	22.0939
lib230524_GAAGGGTAGCCGTTAT-1	-5.59273	18.1
lib230524_GAAGGGTTCCGGGACT-1	-1.87718	33.1971
lib230524_GAAGTAACACCTATCC-1	6.89611	-11.8288
lib230524_GAAGTAAGTAGTACGG-1	-6.85387	31.7511
lib230524_GAATCGTGTGTCCTAA-1	-0.598065	27.505
lib230524_GACACGCCACTCCTGT-1	-10.6073	-13.5115
lib230524_GACATCAGTAGCTCGC-1	-21.8461	25.6693
lib230524_GACCCAGCATCAACCA-1	-20.5333	21.9219
lib230524_GACCCAGTCGTGGGTC-1	-2.76454	21.5313
lib230524_GACCCTTTCAGCTTGA-1	-2.99048	37.8538
lib230524_GACCGTGGTCAGACGA-1	-2.75817	23.9287
lib230524_GACCGTGGTTTGATCG-1	27.6903	-2.35514
lib230524_GACCTTCAGTTGCTCA-1	5.54032	5.73143
lib230524_GACCTTCCAAGTGTCT-1	-3.03339	0.698717
lib230524_GACGCTGAGAGTCCGA-1	-15.2332	13.5047
lib230524_GACGCTGGTCGGTACC-1	7.05623	9.17502
lib230524_GACTCAAAGAGCCCAA-1	-3.68221	37.5987
lib230524_GACTCAAGTATGCGTT-1	-9.74775	22.2509
lib230524_GACTCAAGTCCAACGC-1	23.1918	-0.514007
lib230524_GACTCAAGTGCCGTAC-1	-16.3679	19.234
lib230524_GACTCAATCAAGAGTA-1	-10.9649	-7.10302
lib230524_GACTCTCAGGGATCTG-1	-0.670445	33.3692
lib230524_GACTGATAGCGATGGT-1	2.54146	19.7061
lib230524_GACTGATCACAAGCCC-1	-8.17941	-7.92423
lib230524_GACTTCCCAGACAAAT-1	14.7518	-22.3833
lib230524_GAGAAATCAGGTTACT-1	7.76242	-7.33368
lib230524_GAGACCCGTACCCGAC-1	-8.74974	20.6672
lib230524_GAGACTTAGTGCACTT-1	11.8727	5.95159
lib230524_GAGACTTCAATTTCGG-1	-1.49271	34.3031
lib230524_GAGACTTCACCAGTTA-1	47.3486	-4.54964
lib230524_GAGAGGTAGCGTTCAT-1	24.8844	-9.72158
lib230524_GAGAGGTAGTGTAGAT-1	-15.3151	15.8285
lib230524_GAGATGGCACTTGAGT-1	-43.9469	-1.13064
lib230524_GAGCCTGTCCTGTACC-1	-38.7025	-8.09808
lib230524_GAGGCCTAGACCAGAC-1	-19.8864	22.309
lib230524_GAGGGATTCCACAGCG-1	-0.550478	35.0646
lib230524_GAGGGTAGTCTTGCTC-1	15.233	7.53428
lib230524_GAGTCATGTACTTGTG-1	-7.43158	19.5581
lib230524_GAGTCTAAGTGACACG-1	-22.3759	30.7937
lib230524_GAGTCTACATCACAGT-1	-4.86532	23.2556
lib230524_GAGTGAGTCGACGCTG-1	11.7651	23.5148
lib230524_GAGTGTTGTAACATCC-1	12.8287	7.71101
lib230524_GAGTTTGGTTTGAACC-1	23.1272	1.38929
lib230524_GATAGAATCTTCGTGC-1	14.0396	9.29721
lib230524_GATCAGTGTGGTCTTA-1	-4.52203	20.4132
lib230524_GATCATGAGCGTCAAG-1	10.5428	12.0435
lib230524_GATCCCTCACTGCGTG-1	-13.1921	-13.1143
lib230524_GATGACTCAATCCAGT-1	-1.86856	10.1097
lib230524_GATGACTGTAATGTGA-1	-17.5398	11.0815
lib230524_GATGACTGTCTTTATC-1	-21.1871	31.1391
lib230524_GATGATCAGGAGTCTG-1	18.4626	-6.81044
lib230524_GATGCTAAGCTGGCTC-1	12.2421	9.52958
lib230524_GATGCTACAGTTACCA-1	-16.4789	19.3097
lib230524_GATGGAGAGGCATGGT-1	-14.1342	19.9515
lib230524_GATGGAGCAGGATGAC-1	9.65479	12.8765
lib230524_GATGTTGCAAGCTACT-1	-16.9835	15.0669
lib230524_GATGTTGCACCGTGAC-1	-22.9632	-2.4338
lib230524_GATTTCTAGCCAAGGT-1	-38.7529	-7.94517
lib230524_GATTTCTAGCGCCTAC-1	-10.4629	-9.13991
lib230524_GATTTCTGTAGACGTG-1	-30.7122	6.55086
lib230524_GATTTCTGTATCGTTG-1	-16.3981	25.3221
lib230524_GCAACATGTCTTGAGT-1	10.4427	8.43825
lib230524_GCAACATGTTAGAGAT-1	-4.64955	-20.2018
lib230524_GCAACATTCACTAGCA-1	-8.25965	-0.599969
lib230524_GCAACCGCACCAGACC-1	5.51679	21.8295
lib230524_GCACATATCGTCGGGT-1	13.6621	-4.24009
lib230524_GCACGTGAGGCTTCCG-1	-18.1141	19.4996
lib230524_GCACGTGCAATCGCAT-1	-9.0517	-13.8051
lib230524_GCAGCCACATCAACCA-1	18.1594	-12.2626
lib230524_GCAGGCTTCGAGATGG-1	13.3332	11.4941
lib230524_GCAGTTATCCGATCGG-1	-10.5685	-12.8461
lib230524_GCATCGGCACCAGTAT-1	11.2394	10.8002
lib230524_GCATGATAGGGCAGAG-1	-20.4133	-8.78045
lib230524_GCATTAGGTTAGCGGA-1	8.65465	12.9407
lib230524_GCCAGCATCACGTCCT-1	-31.1721	7.50567
lib230524_GCCAGGTAGTAAACGT-1	-6.23994	25.5163
lib230524_GCCAGTGAGCCGATAG-1	-7.37184	18.0856
lib230524_GCCAGTGTCCTTCACG-1	-0.301548	22.5372
lib230524_GCCAGTGTCTACGGTA-1	-6.95697	32.5588
lib230524_GCCATGGAGCCTGAGA-1	-12.2854	-19.9962
lib230524_GCCATTCCAAATGAAC-1	-26.0932	-5.05976
lib230524_GCCCAGACACCGAATT-1	-4.84897	22.0895
lib230524_GCCCGAAAGACGCTCC-1	-20.8415	30.5479
lib230524_GCCCGAACAATTGCAC-1	-31.696	11.6863
lib230524_GCGAGAAAGCCAAGGT-1	1.10209	32.5041
lib230524_GCGGATCGTTCGATTG-1	-16.1787	12.5341
lib230524_GCGTGCATCCCAAGCG-1	-44.6571	-0.0907173
lib230524_GCTACAAAGACGTCCC-1	2.33436	21.9652
lib230524_GCTACCTCAGCAGATG-1	-17.9858	11.5337
lib230524_GCTACCTGTATTCTCT-1	1.45617	19.2401
lib230524_GCTCAAACAATGACCT-1	-30.0246	7.1443
lib230524_GCTCAAACAGCGAGTA-1	2.18804	22.9001
lib230524_GCTTCACCACACGCCA-1	6.29921	21.1892
lib230524_GCTTGGGGTGTTCCAA-1	-26.0574	-4.99152
lib230524_GGAAGTGGTACCCGCA-1	4.77448	4.68137
lib230524_GGAATGGAGGAAGAAC-1	-5.77223	-23.5118
lib230524_GGACGTCAGCTACTAC-1	-23.0044	-1.937
lib230524_GGAGATGGTGAACCGA-1	24.295	-18.3435
lib230524_GGAGCAAAGAGTGTTA-1	-2.94762	19.4383
lib230524_GGATGTTCAAAGCACG-1	3.58299	-24.0153
lib230524_GGCGTCAGTCATAACC-1	-7.71684	27.6843
lib230524_GGCTTGGTCGTGACTA-1	1.08719	30.4541
lib230524_GGCTTTCCAATTGCCA-1	-15.3006	14.9858
lib230524_GGGAAGTGTTGGGATG-1	-12.4215	17.9675
lib230524_GGGACCTCAGAGTTGG-1	-16.3914	22.5898
lib230524_GGGAGATGTTGCTCGG-1	-44.7481	-0.966836
lib230524_GGGCCATTCCTAAACG-1	6.92771	6.28853
lib230524_GGGCTACAGAAATTGC-1	-19.6735	-22.8241
lib230524_GGGCTACTCTGTCGTC-1	3.69788	32.3887
lib230524_GGGTAGAGTATGAGCG-1	29.6831	-2.69073
lib230524_GGGTAGAGTGCAACAG-1	10.173	10.9633
lib230524_GGGTCACCAGGTGTTT-1	1.53929	32.5846
lib230524_GGGTCACTCCTCATAT-1	6.16961	21.0754
lib230524_GGGTGAAGTTGTCAGT-1	0.60271	20.4622
lib230524_GGGTGTCTCCAAATGC-1	0.281636	33.629
lib230524_GGGTTTAGTGAGCTCC-1	-4.90084	-15.6791
lib230524_GGGTTTATCCATAAGC-1	8.29146	23.0072
lib230524_GGGTTTATCCTCTAGC-1	-19.8936	22.6131
lib230524_GGTCACGGTATAATGG-1	10.5789	8.48743
lib230524_GGTGGCTCATAGGAGC-1	-20.4021	31.0632
lib230524_GGTGGCTCATTGACAC-1	-9.40216	-7.36861
lib230524_GGTGTCGAGCGGTAGT-1	-31.8993	9.57784
lib230524_GGTGTCGCAATGCTCA-1	-0.0606597	34.5216
lib230524_GGTGTCGCATGATGCT-1	-24.9924	-2.20214
lib230524_GGTGTTATCAAGCCGC-1	-2.96658	13.0632
lib230524_GGTGTTATCCCTCATG-1	15.4537	-0.756115
lib230524_GGTTAACGTCGATGCC-1	8.73079	13.4482
lib230524_GGTTAACTCTCGCTCA-1	-20.3321	-8.79804
lib230524_GGTTCTCCAAGATGTA-1	-44.8006	-0.805914
lib230524_GGTTCTCCAGGTGTTT-1	-11.3893	-11.2319
lib230524_GGTTCTCGTTGCACGC-1	11.2772	11.9327
lib230524_GGTTGTACAGCCGTCA-1	45.8702	-5.05251
lib230524_GGTTGTATCAGAGTTC-1	-19.2694	31.6077
lib230524_GTACAACCATGACGGA-1	-5.57902	-22.2202
lib230524_GTACAGTAGGGACTGT-1	4.4831	34.3852
lib230524_GTACAGTGTGGTCAAG-1	-14.9898	17.9947
lib230524_GTAGAGGAGCATGAAT-1	-4.15807	23.5188
lib230524_GTAGAGGCACGGCGTT-1	0.426247	32.7264
lib230524_GTAGAGGCAGTCACGC-1	-9.84294	20.442
lib230524_GTAGAGGTCTCTTGCG-1	2.20058	21.0216
lib230524_GTAGATCGTTATGTGC-1	-21.63	29.531
lib230524_GTAGGAGTCATTATCC-1	2.30662	33.1156
lib230524_GTATTGGAGACCATTC-1	-1.49958	35.8238
lib230524_GTCAAGTCACAAATGA-1	-5.65739	27.237
lib230524_GTCAAGTTCCTGATAG-1	8.58732	23.5518
lib230524_GTCAAGTTCGTGACTA-1	-16.5207	22.5624
lib230524_GTCACGGAGCAGTAAT-1	-5.93529	20.4377
lib230524_GTCACGGTCGAAGCAG-1	-0.475908	33.8961
lib230524_GTCACTCCAATGTGGG-1	14.3281	6.25345
lib230524_GTCATCCAGGTAGTCG-1	-15.2696	21.2764
lib230524_GTCATCCTCTTCTGGC-1	-30.9108	6.98498
lib230524_GTCATGAAGGGCGAGA-1	-6.2077	22.9715
lib230524_GTCCACTGTTCACGAT-1	10.9639	11.0638
lib230524_GTCCCATGTACAGCGA-1	-11.3787	11.2684
lib230524_GTCCCATGTCGCTTAA-1	1.47835	23.2141
lib230524_GTCCTCAAGCAGCGAT-1	-21.6449	20.6876
lib230524_GTCCTCACACGAAAGC-1	16.4053	-3.95995
lib230524_GTCCTCATCGACCATA-1	-19.0073	28.9686
lib230524_GTCGAATCAGTAGAAT-1	-21.9009	26.6595
lib230524_GTCGAATTCTCGCCTA-1	-6.56123	31.3069
lib230524_GTCGCGACAAGAGCTG-1	-1.0161	38.7529
lib230524_GTCGCGAGTCCATCTC-1	7.72311	11.7503
lib230524_GTCGTTCCACATTGTG-1	-3.73004	38.2244
lib230524_GTCGTTCGTGACTGAG-1	-18.8684	29.0771
lib230524_GTCTCACGTCGCTTGG-1	-5.24904	22.4488
lib230524_GTCTGTCTCAAATGAG-1	-10.5498	-22.3551
lib230524_GTGACGCTCGACATCA-1	-16.3917	19.3755
lib230524_GTGAGCCAGGTCCCGT-1	3.45132	35.9719
lib230524_GTGCAGCTCGTTCCTG-1	-7.02146	-15.8427
lib230524_GTGCAGCTCTCTCCGA-1	-10.0625	21.4035
lib230524_GTGCTTCTCTCGGTAA-1	-37.9592	-8.10902
lib230524_GTGGAGAGTGTTAGCT-1	1.60745	8.48002
lib230524_GTGTAACCAGGCTCTG-1	4.10036	0.561517
lib230524_GTGTGATAGTCACTAC-1	8.79464	-7.24162
lib230524_GTGTTAGGTCCAGAAG-1	-15.0451	21.5649
lib230524_GTTACCCTCCGACGGT-1	-22.8922	-5.85897
lib230524_GTTACGACACACGTGC-1	-3.29684	37.9987
lib230524_GTTACGACACTAGGCC-1	-20.6256	-8.76861
lib230524_GTTCATTAGCTATCCA-1	11.3121	10.1391
lib230524_GTTCATTCAGATCCAT-1	-20.865	-23.0829
lib230524_GTTCATTTCGGTCAGC-1	-10.2742	-8.05234
lib230524_GTTCCGTCAGATTCGT-1	-2.46672	20.9534
lib230524_GTTCGCTCACTTGTGA-1	-13.1834	-9.3111
lib230524_GTTGAACAGAGCCATG-1	-4.031	21.051
lib230524_GTTGCTCTCATAGAGA-1	0.536993	37.224
lib230524_GTTGTCCCAAAGACTA-1	-1.1517	38.7463
lib230524_GTTGTGATCTGAGAAA-1	28.4673	-1.89896
lib230524_GTTTACTAGCCATTCA-1	-38.7651	-7.71749
lib230524_GTTTGGACAGGCGTTC-1	8.76178	-15.0588
lib230524_GTTTGGATCCCTTTGG-1	0.685111	31.5213
lib230524_TAACACGGTTCCTAGA-1	29.3185	-1.24948
lib230524_TAACGACAGTTCCATG-1	2.11115	21.2483
lib230524_TAACGACTCTGAGAGG-1	-18.8795	28.4375
lib230524_TAAGCACAGCATTTGC-1	9.30003	-14.3747
lib230524_TAAGCCAGTGTAGTGG-1	19.986	8.92079
lib230524_TAAGCGTCAGACACAG-1	-17.1492	11.9373
lib230524_TAAGCGTTCTCTCAAT-1	-17.6815	12.3348
lib230524_TAAGTCGCAATTCACG-1	-0.170117	36.482
lib230524_TAATCTCAGAGTCCGA-1	-25.1609	-2.32819
lib230524_TAATCTCAGGTACCTT-1	-18.8532	21.8484
lib230524_TAATTCCCAGCAGGAT-1	-5.9193	20.3508
lib230524_TACAACGAGGTAAGAG-1	-11.2303	18.9068
lib230524_TACAACGCATGGGTCC-1	-4.27843	23.13
lib230524_TACAACGTCTTCTGGC-1	-3.8824	37.3824
lib230524_TACACCCTCGGCTGAC-1	15.1463	-8.0668
lib230524_TACCCGTTCTGCATGA-1	-45.4159	0.0219727
lib230524_TACCGAAAGGGTATAT-1	-25.0475	-2.26599
lib230524_TACCGAACAACCAATC-1	-30.5011	7.14525
lib230524_TACGCTCCATCAACCA-1	0.960367	23.3866
lib230524_TACGCTCCATGACGAG-1	-10.8154	-14.0696
lib230524_TACGGGCAGCTAGCCC-1	0.973447	32.4035
lib230524_TACGGGCGTGCGGATA-1	-31.5299	8.45543
lib230524_TACGGTATCCGCCTAT-1	-5.93533	-14.3364
lib230524_TACGTCCCATTGAGCT-1	25.448	-8.07079
lib230524_TACGTCCTCAAATAGG-1	-5.12321	28.3078
lib230524_TACGTCCTCCACTTTA-1	-31.2026	8.33207
lib230524_TACGTCCTCGCCTATC-1	-16.7663	19.4455
lib230524_TACGTCCTCTACCCAC-1	-1.77579	39.6717
lib230524_TACTGCCAGTCACTGT-1	-0.21901	21.3669
lib230524_TACTGCCTCGCCAACG-1	10.8052	12.9377
lib230524_TACTTCATCGTGCGAC-1	-22.0651	30.6635
lib230524_TACTTGTAGTCTAGAA-1	15.5523	2.96241
lib230524_TAGAGTCTCGATCCCT-1	-22.1671	30.0468
lib230524_TAGATCGCACATACGT-1	-40.9119	-1.98559
lib230524_TAGCACAGTCCGGTGT-1	-22.4273	-1.85557
lib230524_TAGGAGGTCATCAGTG-1	2.87428	34.3177
lib230524_TAGGTACAGGTTCTAC-1	-0.319055	33.8076
lib230524_TAGGTACGTGAGGAAA-1	15.3665	8.49993
lib230524_TAGGTTGAGCACTTTG-1	-13.5442	23.1909
lib230524_TAGTGCAGTTACCTGA-1	0.801858	23.2429
lib230524_TATACCTAGGATTACA-1	20.5581	6.02358
lib230524_TATACCTAGGCTCTAT-1	-15.2944	21.585
lib230524_TATCAGGAGGAGAGGC-1	-12.8118	-10.9419
lib230524_TATCCTACACTGATTG-1	13.8008	9.79265
lib230524_TATCCTACAGTTACCA-1	-21.3466	21.1456
lib230524_TATCTGTCAGACAATA-1	0.468335	32.908
lib230524_TATCTGTCATGACTAC-1	-19.4776	11.2445
lib230524_TATCTGTTCCCTCGAT-1	4.84131	20.4543
lib230524_TATGTTCAGACCTTTG-1	-11.1338	-7.54418
lib230524_TATTGCTAGCCTGACC-1	-21.719	20.5479
lib230524_TATTGGGAGTGGTGAC-1	-21.3071	21.0453
lib230524_TATTGGGCAGCTTTGA-1	-6.93858	28.9134
lib230524_TATTTCGGTGTTCCTC-1	-22.8577	-2.45309
lib230524_TCAAGCACAGCTGAAG-1	-4.32808	35.9706
lib230524_TCAATCTCACCAAATC-1	1.63136	37.6577
lib230524_TCAATTCAGGGATCAC-1	22.1463	2.45064
lib230524_TCAATTCCAAGGCCTC-1	-2.10384	38.6192
lib230524_TCAATTCTCGCGTCGA-1	29.9196	-6.15231
lib230524_TCACATTGTATCGCAT-1	-25.9671	-2.24421
lib230524_TCACGGGAGCATCAAA-1	5.46735	7.38965
lib230524_TCACTATAGACTCGAG-1	4.84302	19.8999
lib230524_TCAGGTACATCTGGGC-1	-4.14729	-12.3679
lib230524_TCAGTCCAGTCATGCT-1	7.6002	-7.40604
lib230524_TCAGTCCGTCTTCTAT-1	8.97837	-18.8431
lib230524_TCAGTGACACCCTGAG-1	-11.5345	-11.098
lib230524_TCAGTTTAGGGCAATC-1	45.8908	-4.94636
lib230524_TCATACTAGGATCATA-1	-0.922934	23.1616
lib230524_TCATACTGTTCAGTAC-1	-19.9568	-23.1467
lib230524_TCATATCTCAAGATAG-1	-9.10373	-7.58299
lib230524_TCATCATCACGGTGAA-1	0.214273	7.11746
lib230524_TCATCATGTGGAACAC-1	-6.83883	-21.8323
lib230524_TCATCCGAGGACTATA-1	-21.3814	-23.4111
lib230524_TCATCCGCAGACAATA-1	-22.3405	-6.8765
lib230524_TCATGAGCATAGGCGA-1	-0.185983	8.14801
lib230524_TCATGAGGTTAGTCGT-1	8.98054	-13.8875
lib230524_TCATTCAAGCAAATGT-1	-1.75651	9.769
lib230524_TCATTGTAGTTAGTGA-1	2.12393	37.3792
lib230524_TCATTGTCACAACATC-1	-0.0180644	35.0989
lib230524_TCATTGTCACTTGACA-1	-9.56782	25.0084
lib230524_TCATTGTCATGAATAG-1	0.957212	33.7818
lib230524_TCCACCAGTCAGGTGA-1	-21.1663	20.9602
lib230524_TCCACGTCATCGATCA-1	-16.5151	27.6252
lib230524_TCCATGCCATGACTAC-1	-14.8695	13.6994
lib230524_TCCATGCTCATCGCCT-1	-31.094	7.8865
lib230524_TCCCACAAGATCGCTT-1	4.96327	9.75516
lib230524_TCCCAGTAGGTACAGC-1	-1.2861	33.634
lib230524_TCCCAGTCAGACGGAT-1	-9.56352	18.356
lib230524_TCCCAGTGTTTCGTTT-1	-13.3692	20.8056
lib230524_TCCCATGCACAGTACT-1	-21.8603	30.0832
lib230524_TCCCATGTCACACCGG-1	4.30313	7.86594
lib230524_TCCGAAAGTTCTTCAT-1	24.3175	-6.84494
lib230524_TCCGATCCAGCAGAAC-1	-3.24653	35.0717
lib230524_TCCGATCTCCCTCTTT-1	-2.2501	35.9587
lib230524_TCCGATCTCGGAAGGT-1	12.4839	11.7453
lib230524_TCCGGGACACTTGAAC-1	-17.6605	21.4992
lib230524_TCCTAATAGCCAAGTG-1	-18.7245	11.8136
lib230524_TCCTCCCGTAGGAGTC-1	-23.2807	-2.08718
lib230524_TCCTCCCGTCGATGCC-1	13.9327	-9.34566
lib230524_TCCTCGAAGTTTGTCG-1	-9.44692	18.3117
lib230524_TCCTCGACAGCCATTA-1	12.5592	-11.3791
lib230524_TCCTCGAGTTCCACGG-1	-30.3093	7.94465
lib230524_TCCTCTTGTGAGTAAT-1	5.49232	8.74632
lib230524_TCCTCTTTCCGTCACT-1	-0.530885	33.4402
lib230524_TCCTGCAGTGCCTTTC-1	14.4221	-5.43018
lib230524_TCCTTCTGTGAACGGT-1	9.99417	7.09129
lib230524_TCCTTTCGTATCGAAA-1	-16.0803	29.8908
lib230524_TCGAACAGTCATCGGC-1	1.6556	9.7161
lib230524_TCGAACATCTATACTC-1	17.0114	9.33368
lib230524_TCGAAGTCAGTTTCAG-1	-10.8013	-7.48851
lib230524_TCGAAGTTCTGGCCTT-1	14.49	-4.29291
lib230524_TCGACCTGTGAACGGT-1	9.39453	11.3322
lib230524_TCGACGGTCTAGTACG-1	-12.5949	-9.64074
lib230524_TCGATTTCACCGTGAC-1	3.98788	35.6548
lib230524_TCGCAGGCAGTCTCTC-1	-0.64449	21.9127
lib230524_TCGCTCATCATCCTGC-1	-17.801	12.8522
lib230524_TCGCTTGCAAAGGAGA-1	-3.93412	34.9865
lib230524_TCGGATACATCCGATA-1	-1.95976	34.7488
lib230524_TCGGATAGTCCACACG-1	10.8894	6.80346
lib230524_TCGGGCACAACACACT-1	-20.0795	31.5621
lib230524_TCGGGTGCATAATGAG-1	28.938	-6.88365
lib230524_TCGGTCTGTGTGTCCG-1	10.8889	8.24972
lib230524_TCGTCCAGTTGCATGT-1	-9.92435	-1.35587
lib230524_TCTAACTGTCATCTAG-1	-21.1194	-23.021
lib230524_TCTACATGTGATCATC-1	-3.2862	35.3429
lib230524_TCTATACGTGGCAACA-1	-4.06059	23.1508
lib230524_TCTATACTCCATAGAC-1	-22.5481	-2.00502
lib230524_TCTATCAAGCCATTTG-1	2.70998	37.1708
lib230524_TCTCTGGTCTCCAATT-1	1.71369	34.1167
lib230524_TCTGCCACATTCTCTA-1	15.0154	-8.15713
lib230524_TCTGGCTAGGTCCCTG-1	15.5272	-8.09214
lib230524_TCTGTCGCACATACTG-1	-0.573584	29.1299
lib230524_TCTGTCGCACTCCGGA-1	15.1986	1.9876
lib230524_TCTGTCGCAGCCTATA-1	2.62307	37.1655
lib230524_TCTTGCGCACGCTTAA-1	-7.3577	-26.3473
lib230524_TCTTGCGGTCGCTTAA-1	-6.63428	-22.0928
lib230524_TCTTTGAAGCCTTCTC-1	5.58324	21.9784
lib230524_TGAACGTAGTTTCGAC-1	-4.68525	35.563
lib230524_TGAACGTTCGGCCCAA-1	-9.98844	-16.149
lib230524_TGAACGTTCGGTCATA-1	-9.77831	20.1565
lib230524_TGAATGCCACGGCACT-1	-17.4797	-1.7172
lib230524_TGACAGTGTTCTTAGG-1	5.71291	22.0351
lib230524_TGACAGTTCCTACGGG-1	-15.8072	-23.0034
lib230524_TGACCCTTCCGGGACT-1	-5.6633	17.9707
lib230524_TGACGCGCATCCAACA-1	10.0332	11.5937
lib230524_TGACTCCCAATGAGCG-1	-19.0845	31.2401
lib230524_TGAGACTCAATGCTCA-1	-5.92262	19.7706
lib230524_TGAGACTCATCGGAGA-1	-10.7143	13.0857
lib230524_TGAGACTGTCTCGGAC-1	-5.80608	28.3006
lib230524_TGAGACTTCCTACCAC-1	-19.576	31.4953
lib230524_TGAGCGCAGCCTGACC-1	-1.68593	9.34395
lib230524_TGAGCGCTCCGGACTG-1	-18.1557	-22.186
lib230524_TGAGCGCTCGACCAAT-1	9.90006	7.13065
lib230524_TGAGGAGCAGACGGAT-1	51.9377	-4.03404
lib230524_TGAGGGAAGGCTTAAA-1	8.85298	12.0561
lib230524_TGAGGGACATAGATCC-1	-6.04224	-15.8026
lib230524_TGAGGGATCTTTGATC-1	-20.3865	24.0997
lib230524_TGATCAGGTGTCTTCC-1	9.59811	-0.706543
lib230524_TGATCTTAGCAAACAT-1	-3.12927	31.9294
lib230524_TGATCTTCAGTATTCG-1	-3.22444	34.8121
lib230524_TGATCTTTCGGTAGGA-1	22.0656	-4.11987
lib230524_TGATGCAAGCACACCC-1	-21.3125	24.8993
lib230524_TGATGCACATCATCCC-1	21.5213	6.45955
lib230524_TGATGGTTCCACTGAA-1	9.48004	6.93312
lib230524_TGATTCTAGCTGCCTG-1	-2.88453	38.2614
lib230524_TGATTTCCACAGTGTT-1	-21.8277	29.7094
lib230524_TGCAGATCAATCCTTT-1	-39.7364	-6.67292
lib230524_TGCAGGCCAAGAGATT-1	-18.1513	13.9344
lib230524_TGCAGTATCCCGTTCA-1	19.1717	2.47824
lib230524_TGCCGAGAGAACTCCT-1	-24.4619	-2.35279
lib230524_TGCGACGGTGAGGCAT-1	-25.95	-4.82059
lib230524_TGGAACTCATGACGAG-1	10.2426	7.98686
lib230524_TGGAACTTCGGTCTGG-1	-12.6167	18.189
lib230524_TGGAGAGAGCACTCGC-1	4.65817	8.20726
lib230524_TGGAGGAAGGCAGCTA-1	-2.77745	24.5558
lib230524_TGGATCAGTAGGTGCA-1	-21.8904	21.5518
lib230524_TGGATCATCCTCACGT-1	-14.2964	15.7066
lib230524_TGGATGTCATCCCACT-1	4.44929	20.9233
lib230524_TGGCGTGGTCCAGTTA-1	3.75748	35.7837
lib230524_TGGGATTTCACCGACG-1	-4.5642	-15.6357
lib230524_TGGTGATGTTTATGCG-1	-2.14696	23.0176
lib230524_TGTAACGAGATGAACT-1	-16.478	26.8099
lib230524_TGTAACGAGTTTAGGA-1	-17.5598	21.8938
lib230524_TGTACAGCACTACACA-1	2.37517	22.731
lib230524_TGTCAGACAATGCTCA-1	-0.178848	18.6525
lib230524_TGTCAGACAGTACTAC-1	5.81285	21.7869
lib230524_TGTCCACAGCATGCAG-1	-10.7152	-7.39101
lib230524_TGTCCACAGTAGCCAG-1	1.25972	31.4401
lib230524_TGTCCACCATCTAGAC-1	-31.3359	8.09717
lib230524_TGTGTGAGTAGTAAGT-1	-16.0075	19.3043
lib230524_TGTTACTAGAGAACCC-1	-7.44411	-15.4503
lib230524_TGTTACTCATTGGATC-1	-45.2789	0.191203
lib230524_TGTTCATAGAAGGCTC-1	25.3849	-7.69053
lib230524_TGTTCCGCAAGTGGGT-1	0.345567	21.4616
lib230524_TGTTGAGAGACCTCAT-1	-1.06276	29.9361
lib230524_TGTTGGATCCATTTAC-1	-4.66673	20.1239
lib230524_TTACAGGAGGTTATAG-1	1.85685	21.6308
lib230524_TTACCATAGCCTGCCA-1	-18.5654	19.9005
lib230524_TTACCATTCTACTATC-1	11.2205	12.061
lib230524_TTACCGCAGGATTACA-1	-12.7441	-9.62493
lib230524_TTACGCCCAGCTTTGA-1	1.48824	37.1975
lib230524_TTACGTTAGTTTCGGT-1	-30.6481	7.63564
lib230524_TTAGGCAAGACATCCT-1	11.5769	10.2216
lib230524_TTAGGGTAGTACCCTA-1	8.46215	23.699
lib230524_TTAGTCTTCCTTCGAC-1	-5.51567	-13.4576
lib230524_TTATTGCAGGGACAGG-1	-30.5967	7.70001
lib230524_TTATTGCCAGCTGTCG-1	-7.42301	-8.54604
lib230524_TTATTGCTCCTCGCAT-1	17.5112	-5.70187
lib230524_TTCAATCAGACGGAAA-1	-21.0205	21.4014
lib230524_TTCAATCGTGTATACC-1	-1.56751	17.9373
lib230524_TTCAATCTCATTGCGA-1	-11.0847	-21.7506
lib230524_TTCAATCTCTCAAAGC-1	-12.6394	-9.74127
lib230524_TTCACCGGTATTAAGG-1	7.28112	-10.1291
lib230524_TTCACGCCACAGAGCA-1	-0.00511786	33.9042
lib230524_TTCACGCGTCTCGGGT-1	4.93346	8.84579
lib230524_TTCATTGAGGACTTCT-1	-22.1177	25.1297
lib230524_TTCCAATAGTCGAAGC-1	-15.4178	13.3488
lib230524_TTCCACGAGACTAAGT-1	-9.15424	20.557
lib230524_TTCCGTGAGACAACAT-1	-13.0222	4.38081
lib230524_TTCCGTGGTTGTAGCT-1	-21.826	29.86
lib230524_TTCCTAAAGCGGGTAT-1	-15.5985	15.5703
lib230524_TTCCTAACACACCTGG-1	23.9778	-8.85795
lib230524_TTCCTCTTCATACGGT-1	-16.4054	22.5885
lib230524_TTCCTTCTCCATTTCA-1	-1.17846	38.5061
lib230524_TTCGATTGTCATAACC-1	-39.9134	-7.2527
lib230524_TTCGGTCGTTGTCCCT-1	-6.3832	18.9892
lib230524_TTCTAACCAGCTTTCC-1	-19.062	31.6267
lib230524_TTCTAACGTGACTCTA-1	-20.4162	18.2826
lib230524_TTCTAGTGTATAGGAT-1	-0.667545	30.2759
lib230524_TTCTCTCTCATCTACT-1	15.1665	-2.00612
lib230524_TTGACCCCAATAACGA-1	-20.0004	23.5385
lib230524_TTGATGGCAACTGCCG-1	-9.99783	-13.6553
lib230524_TTGCATTAGGAATGTT-1	-4.03454	23.215
lib230524_TTGCATTTCGTAACAC-1	19.8484	1.74652
lib230524_TTGCGTCGTCGTATTG-1	-6.01196	17.6529
lib230524_TTGCTGCAGCACTCCG-1	-0.577767	7.46809
lib230524_TTGGATGTCGAGAAGC-1	-0.831179	29.4921
lib230524_TTGGGTAGTAGTACGG-1	-30.091	6.92153
lib230524_TTGGTTTCAAGTCATC-1	-26.14	-2.57529
lib230524_TTGTGGAAGCTAGCCC-1	-20.8577	28.661
lib230524_TTGTGTTAGCATCAGG-1	-21.4971	20.6069
lib230524_TTGTTCAAGCGGATCA-1	1.18021	23.1732
lib230524_TTGTTGTCATCGGAAG-1	-1.89756	8.50314
lib230524_TTGTTTGCATGTACGT-1	-7.51248	-16.2479
lib230524_TTGTTTGTCTGGGATT-1	28.5419	-1.63398
lib230524_TTTATGCCAATCGCGC-1	-10.389	-7.88677
lib230524_TTTCAGTAGTTGCTCA-1	-21.1072	29.5393
lib230524_TTTCCTCAGCGAACTG-1	-3.12626	-0.468922
lib230524_TTTCGATCACGTTGGC-1	-0.0178367	34.4983
lib230524_TTTGACTAGGGCAACT-1	-6.36904	22.3659
lib230524_TTTGATCAGTCTTCCC-1	27.9373	-0.977627
lib230524_TTTGATCTCGACGCTG-1	-5.04015	-15.3791
lib230524_TTTGATCTCTCGCAGG-1	-8.37525	20.6594
lib230524_TTTGGTTAGCTAATGA-1	-2.98885	17.539
lib230524_TTTGTTGGTAACATCC-1	26.0525	-10.9101
lib230331_AAACCCACACTCCGAG-1	-9.42946	12.8622
lib230331_AACCAACCACTTCTCG-1	7.6612	8.40462
lib230331_AACCTTTTCGAGAAAT-1	-23.4663	24.8312
lib230331_AAGACAACAAGAGTGC-1	7.95823	-30.82
lib230331_AAGACAATCCCATTTA-1	16.6268	-26.6972
lib230331_AAGCATCAGCTAAATG-1	11.2556	23.2787
lib230331_AAGCCATCACTGCGTG-1	-2.84498	-0.41277
lib230331_AAGTTCGAGCGAGGAG-1	14.8621	-26.7165
lib230331_AATCACGGTACGATCT-1	9.77182	23.8011
lib230331_AATGCCACACGCGCTA-1	3.85239	35.3165
lib230331_AATGCCACAGCTACTA-1	-14.8399	4.86724
lib230331_ACAAAGACATCGCCTT-1	8.869	-10.0379
lib230331_ACACAGTAGGAAGAAC-1	-8.35162	14.8521
lib230331_ACACGCGAGACCTTTG-1	12.9693	24.8039
lib230331_ACAGGGACAAAGCTCT-1	-7.03334	12.3182
lib230331_ACCATTTTCCAGTGCG-1	4.34839	-18.4595
lib230331_ACGATGTGTCCCACGA-1	-4.09263	15.8699
lib230331_ACGGGTCCAATGTCAC-1	7.11429	-29.1037
lib230331_ACGGGTCCAGAACATA-1	-2.8173	33.2431
lib230331_ACGTAGTCAACCCGCA-1	18.6583	-26.4257
lib230331_ACGTAGTTCACGACTA-1	-9.76532	13.1159
lib230331_ACTATGGGTAAGACCG-1	-19.3964	10.7655
lib230331_ACTCTCGAGGCTCTCG-1	11.8029	25.6314
lib230331_ACTGCAAGTACGACAG-1	13.8385	25.3606
lib230331_ACTGTGAGTCTTGCTC-1	11.6607	25.5299
lib230331_ACTTAGGTCAGCTGAT-1	-3.71885	16.6982
lib230331_ACTTCCGCACACGTGC-1	-27.9131	-3.01434
lib230331_ACTTTCAAGAGCATCG-1	-13.1622	-12.9455
lib230331_ACTTTCATCCTGTTGC-1	-38.5626	-9.44023
lib230331_AGAACCTAGTGCAAAT-1	11.3433	25.3559
lib230331_AGACACTAGTACGTCT-1	13.4947	25.1268
lib230331_AGACCATGTGAGACCA-1	-4.68218	15.778
lib230331_AGACTCAAGGGATGTC-1	-2.58356	18.7427
lib230331_AGACTCACAGACTGCC-1	-9.98159	14.2059
lib230331_AGACTCAGTGAATTGA-1	5.30506	10.1111
lib230331_AGCATCAGTTATGGTC-1	8.34309	9.81318
lib230331_AGCCAGCTCTCTTCAA-1	6.02061	7.71343
lib230331_AGCGCCACAATGACCT-1	-4.92023	-0.185367
lib230331_AGCTACATCGCTCATC-1	15.5983	-23.1201
lib230331_AGCTACATCTTGAGCA-1	-7.29982	28.6876
lib230331_AGCTCAAAGTGCAACG-1	6.13948	5.40312
lib230331_AGCTTCCCAAATCCCA-1	7.93793	-1.22854
lib230331_AGCTTCCCATGCAGGA-1	-9.70009	13.7655
lib230331_AGGCTGCCAGTCGCAC-1	-12.236	-12.6699
lib230331_AGGCTGCGTATCGATC-1	-8.04852	12.7164
lib230331_AGGTCATAGTTGGAAT-1	20.4799	-4.98492
lib230331_AGGTCATGTTGTGCAT-1	-3.73301	17.1128
lib230331_AGGTGTTAGATGCGAC-1	-5.56153	-17.1164
lib230331_AGTACCAGTCGGTACC-1	16.9765	-23.1436
lib230331_AGTCAACAGCCTATCA-1	20.9498	-21.7607
lib230331_AGTGACTCATCCGTTC-1	-3.63132	18.1363
lib230331_AGTGTTGCACCAGTTA-1	12.9786	24.692
lib230331_ATACCTTCACGTCATA-1	-7.6346	-25.8115
lib230331_ATACCTTCAGCTACTA-1	15.8318	-26.8886
lib230331_ATAGACCTCCTCCACA-1	-24.1383	-2.74685
lib230331_ATAGGCTTCCGCTTAC-1	1.82383	-1.93661
lib230331_ATATCCTAGAGCAACC-1	-7.11653	0.00925728
lib230331_ATATCCTCAGAAGTGC-1	9.37936	-31.4981
lib230331_ATCCACCGTACTAACC-1	4.35812	35.4035
lib230331_ATCCATTGTTGACTAC-1	-20.6725	-23.4591
lib230331_ATCGCCTGTACAAACA-1	7.34031	-31.5819
lib230331_ATCGGATAGTGACCTT-1	15.5504	-21.6965
lib230331_ATCGTCCAGGGCAGAG-1	12.4295	-11.7038
lib230331_ATCGTGAAGTCTTGGT-1	10.486	24.8509
lib230331_ATCTCTATCAGCTTGA-1	6.65206	10.6213
lib230331_ATGCCTCCACGTTCGG-1	4.7273	34.6386
lib230331_ATGCCTCCATCATCTT-1	15.8942	-26.1455
lib230331_ATGCCTCGTGATCATC-1	-0.836251	0.593846
lib230331_ATGGAGGCAAGTACCT-1	18.0695	-24.1964
lib230331_ATGTCTTTCGCCTAGG-1	8.3283	9.4378
lib230331_ATTATCCGTATCCTTT-1	-7.45695	-24.0743
lib230331_ATTCAGGTCCGGTAAT-1	9.09809	23.8528
lib230331_ATTCATCCACAATCTG-1	-30.9832	6.27365
lib230331_ATTCCTACATCAGTCA-1	-14.6002	-23.2542
lib230331_ATTCGTTAGCCGATCC-1	11.2652	-24.4992
lib230331_ATTCGTTAGGCAATGC-1	10.0734	-11.667
lib230331_ATTGGGTGTTCGGTAT-1	-8.44663	-17.4582
lib230331_ATTTCACGTGCTGTCG-1	5.65851	9.6314
lib230331_CAACAACCAGTCGTTA-1	1.86055	28.67
lib230331_CAACGATGTCAAGGCA-1	-8.98834	15.3892
lib230331_CAATACGGTAGACACG-1	9.30535	23.9083
lib230331_CAATACGTCATCAGTG-1	7.16769	-10.522
lib230331_CAATGACAGAAAGTCT-1	10.4085	23.1727
lib230331_CACGGGTAGCAGGCTA-1	-4.57147	-0.203167
lib230331_CACTAAGCAAGCCTGC-1	-22.7146	-6.13611
lib230331_CACTGAAGTACTCGCG-1	12.4413	-0.45522
lib230331_CACTGGGAGTGAATAC-1	-3.18648	-25.2335
lib230331_CACTGTCCAAGTGTCT-1	-15.1246	5.14787
lib230331_CAGCAATCAAGTATAG-1	-3.98895	16.8642
lib230331_CAGCGTGAGGTCCCGT-1	-13.3913	-22.1786
lib230331_CAGCGTGGTGATTCAC-1	5.5336	-0.287818
lib230331_CAGCGTGTCGCGTAGC-1	-23.3187	21.74
lib230331_CAGGCCAGTCTGCATA-1	-7.95882	14.0782
lib230331_CAGTTCCCAAAGGGTC-1	-8.30763	14.198
lib230331_CATAAGCCACAATTCG-1	-4.33225	17.2898
lib230331_CATCCACAGTGTTCCA-1	4.29573	1.98706
lib230331_CATCGTCAGTAAACAC-1	13.6766	25.2481
lib230331_CATCGTCCAACCGCTG-1	19.9478	-21.5987
lib230331_CATGGTATCTGAGATC-1	-9.84973	13.0306
lib230331_CATTCTAGTGCCAAGA-1	-13.4976	5.57613
lib230331_CATTTCAAGTACTCGT-1	10.2463	23.6842
lib230331_CCACGAGAGCGTGCTC-1	-10.0283	-26.007
lib230331_CCACGAGAGTGTTCAC-1	-32.0675	7.85586
lib230331_CCACTTGAGAAACTAC-1	-14.0608	4.0978
lib230331_CCACTTGTCGCTATTT-1	-3.91076	16.7866
lib230331_CCCAACTCATCGAGCC-1	-23.2691	-1.6403
lib230331_CCCGGAACAAGGAGTC-1	11.9025	23.5874
lib230331_CCCTAACAGTAACGAT-1	-22.7593	-6.32324
lib230331_CCCTAACGTCTTAGTG-1	-8.79385	-20.5205
lib230331_CCCTAACGTGATTAGA-1	-2.82188	19.1256
lib230331_CCCTAACTCTACACAG-1	4.77066	-16.0129
lib230331_CCCTAACTCTATCCAT-1	4.38122	4.95776
lib230331_CCCTCAAAGACAAGCC-1	12.0766	-26.4262
lib230331_CCCTGATAGTATCCTG-1	8.03762	-30.5967
lib230331_CCGATCTTCATTTACC-1	8.59432	23.6192
lib230331_CCGTTCATCGCTCCTA-1	-8.25947	13.2974
lib230331_CCTACGTTCACAGTGT-1	-10.9695	14.683
lib230331_CCTCAGTTCTTGCAAG-1	15.9805	-3.35256
lib230331_CCTCATGCAGACTGCC-1	-12.2133	-13.1456
lib230331_CCTCCAAGTGAGATTA-1	-9.30283	13.4515
lib230331_CCTCTAGAGGAACGTC-1	-20.8913	19.6237
lib230331_CCTCTCCTCACTCGAA-1	-8.38524	15.0753
lib230331_CCTTGTGCATGTGACT-1	10.2196	-30.3083
lib230331_CGAAGTTAGGGTACAC-1	-9.84911	14.0887
lib230331_CGACAGCCAGACCGCT-1	-1.76722	18.3085
lib230331_CGAGAAGAGAACTCCT-1	23.8113	-16.4866
lib230331_CGAGGCTCATCCGATA-1	-7.97646	-15.4605
lib230331_CGAGTGCAGCTGACAG-1	6.2656	-30.8374
lib230331_CGATGCGAGGCGCTCT-1	-28.0052	-5.87864
lib230331_CGCATAATCTAATTCC-1	-4.22194	15.4905
lib230331_CGCCAGAGTTACGCCG-1	-5.9139	-16.7617
lib230331_CGCCATTCACAGTACT-1	-38.7299	-9.42093
lib230331_CGGAACCCAAACCGGA-1	11.1246	-9.36725
lib230331_CGGACACTCTGCTAGA-1	-27.8437	-2.95711
lib230331_CGGGACTGTCTTGGTA-1	-1.46312	-30.753
lib230331_CGGGACTTCAACGAGG-1	24.0501	-8.7335
lib230331_CGTCAAACAAATGCTC-1	18.2075	-23.6379
lib230331_CGTGATACAGGAGGTT-1	9.64185	-30.7876
lib230331_CGTTAGATCAACTTTC-1	-14.9669	4.71136
lib230331_CGTTCTGAGCTTTCTT-1	-13.5016	-9.87072
lib230331_CGTTGGGCACTAGGCC-1	-39.1867	-9.40661
lib230331_CGTTGGGTCTGTCAGA-1	-1.18832	0.449328
lib230331_CTAACCCCACAGAAGC-1	-38.6905	-9.22848
lib230331_CTAACTTCATGTTTGG-1	-26.9206	-2.73022
lib230331_CTAAGTGCAAGTGCTT-1	-8.44666	14.2784
lib230331_CTAAGTGTCGGCACTG-1	-13.7924	5.05071
lib230331_CTACTATGTGCGGTAA-1	-7.72647	17.7428
lib230331_CTCAACCGTTTGAAAG-1	4.60089	-31.0299
lib230331_CTCACTGCAACGGCTC-1	3.92444	4.89086
lib230331_CTCAGGGCAGAGAAAG-1	-13.9216	5.14992
lib230331_CTCCACACACACGTGC-1	4.53017	-16.537
lib230331_CTCCCTCAGCTTTCCC-1	1.97911	-2.79029
lib230331_CTCCTTTGTAACTAAG-1	6.21245	7.12516
lib230331_CTCTGGTCAAGGTCTT-1	19.426	-11.842
lib230331_CTGCATCCATGTAACC-1	-5.22589	13.9093
lib230331_CTGCATCGTCCCTGTT-1	-38.5972	-9.43785
lib230331_CTGGACGTCGGCGATC-1	-20.0518	10.9127
lib230331_CTGTAGACAGCGCTTG-1	-20.3985	-22.9822
lib230331_CTTAGGAAGGGTTGCA-1	-2.71221	-28.7215
lib230331_CTTCCGAGTGGATCGA-1	-28.3588	-3.55607
lib230331_CTTCGGTGTCTCAGAT-1	0.368282	18.6946
lib230331_CTTCTCTTCAGACCTA-1	5.23387	11.5266
lib230331_GAACGTTAGAGCCATG-1	10.3838	-26.9045
lib230331_GAACGTTTCTTAGTTC-1	23.6387	-15.7464
lib230331_GAAGGGTAGAGGCTGT-1	13.1851	24.6436
lib230331_GAAGTAATCTTACCGC-1	-9.64802	-0.154045
lib230331_GACACGCCAGCACCCA-1	6.09345	10.7834
lib230331_GACATCAAGTTTCGGT-1	-19.6218	-22.8405
lib230331_GACCAATTCCGATTAG-1	8.98852	-31.1522
lib230331_GACCTTCCAGGTGACA-1	-3.95869	0.11996
lib230331_GACTCTCCATATACCG-1	11.3647	25.2414
lib230331_GACTTCCAGACATATG-1	0.468664	-31.6292
lib230331_GACTTCCAGTGCAAAT-1	-10.2631	16.7094
lib230331_GAGACTTCAGGATCTT-1	8.56288	-29.9151
lib230331_GAGAGGTTCCACTGGG-1	13.5562	25.2418
lib230331_GAGATGGCATCCTTGC-1	-13.9994	-9.90435
lib230331_GAGCTGCGTAAGTTAG-1	-4.36581	-0.133481
lib230331_GAGGCCTAGCCTGAGA-1	-2.49605	20.8161
lib230331_GAGGGATAGAAGTATC-1	-1.58744	16.7241
lib230331_GAGTCTATCCAGTACA-1	7.60226	24.9587
lib230331_GATGATCTCATAGGCT-1	7.72239	-28.0695
lib230331_GATGTTGCACATACGT-1	-9.62499	12.9718
lib230331_GATTTCTGTACTAACC-1	6.31251	4.7436
lib230331_GCACATACAGCGACCT-1	-3.02703	16.5525
lib230331_GCACATATCGCTTACC-1	7.58568	-29.393
lib230331_GCAGGCTAGTAGGTTA-1	5.19527	12.0269
lib230331_GCATCGGCACCTCTGT-1	12.2367	24.5671
lib230331_GCCATGGAGCCTCCAG-1	-3.8225	-18.283
lib230331_GCCATGGCAAATTGGA-1	12.7211	-10.4563
lib230331_GCCATGGCATCATGAC-1	-10.1035	-28.4919
lib230331_GCCATGGGTTTGGGTT-1	-7.00343	24.6334
lib230331_GCCATTCTCCCTTGTG-1	5.02447	2.01205
lib230331_GCCCAGAAGGCTCAAG-1	7.00034	-9.12224
lib230331_GCCCAGATCTCCAAGA-1	-32.4271	14.7053
lib230331_GCCTGTTCAGTTGGTT-1	-4.14915	16.4355
lib230331_GCGATCGTCTACCTTA-1	10.7699	24.4018
lib230331_GCGTGCAGTCCAGCCA-1	-9.53062	13.8524
lib230331_GCGTTTCAGAGTGTGC-1	-2.4012	16.892
lib230331_GCTACAAGTAATGTGA-1	-27.8051	-2.92928
lib230331_GCTACAATCGTTCTAT-1	-14.4587	4.89776
lib230331_GCTACCTTCGAATGCT-1	-8.79137	-23.2412
lib230331_GCTGAATGTACCTATG-1	4.37476	-17.5232
lib230331_GCTGGGTGTATCCTTT-1	-2.91034	-25.2588
lib230331_GGATGTTGTAATCAAG-1	-8.50071	-18.0414
lib230331_GGCGTCAAGAATTGTG-1	-7.21864	13.7169
lib230331_GGCTTGGCAGCGAGTA-1	8.24264	-27.8845
lib230331_GGGACAACATTGCCTC-1	6.13548	23.621
lib230331_GGGACAATCGTCCATC-1	15.0322	-24.5199
lib230331_GGGACCTGTTGCATGT-1	2.20307	8.65794
lib230331_GGGATGATCTATCACT-1	-10.5001	-13.9901
lib230331_GGGCCATGTATCCTCC-1	10.0195	-30.3183
lib230331_GGGCCATTCGAACGCC-1	5.789	-18.0156
lib230331_GGGTCACGTCCAAGAG-1	-5.6274	-22.2447
lib230331_GGGTGTCTCCATTCAT-1	-20.6301	-23.2034
lib230331_GGGTGTCTCGAGAACG-1	-0.712028	18.4399
lib230331_GGGTTATAGGTACAAT-1	6.4295	-26.9754
lib230331_GGTCTGGGTGAGCGAT-1	18.1738	-25.8418
lib230331_GGTGTTACAACTAGAA-1	-3.7914	-26.1393
lib230331_GGTGTTAGTCAGGCAA-1	16.1504	-28.0506
lib230331_GTAACACAGGGAACAA-1	11.2925	-7.59982
lib230331_GTAAGTCCAGAGAAAG-1	-5.66064	-13.3606
lib230331_GTAAGTCGTCAACGCC-1	9.39524	23.8361
lib230331_GTAATCGAGTTGCCCG-1	-15.4336	4.97414
lib230331_GTAATGCTCGCTAGCG-1	22.9735	-23.0202
lib230331_GTAGAGGCACCCTTGT-1	-2.68834	8.30229
lib230331_GTAGATCGTCTCACGG-1	-9.4994	-17.7536
lib230331_GTAGATCGTTAAGACA-1	11.7937	23.9774
lib230331_GTAGATCGTTTCAGAC-1	15.9589	-24.3261
lib230331_GTAGGTTCACCTTCGT-1	6.53107	-12.6607
lib230331_GTAGTACTCGAAGAAT-1	-4.48458	16.3907
lib230331_GTCAGCGTCGCTTTAT-1	2.15021	-0.830244
lib230331_GTCATCCGTCGCGTCA-1	-0.580128	-18.8399
lib230331_GTCCTCACAGGTCTCG-1	-26.5651	-4.51063
lib230331_GTCGCGACAGGCGTTC-1	-1.62642	6.30829
lib230331_GTCTACCCAACGCCCA-1	-7.21847	0.056485
lib230331_GTCTACCTCCTAGAGT-1	-20.3579	-8.78409
lib230331_GTCTAGATCCCTCTCC-1	-0.100414	31.4114
lib230331_GTGAGCCGTCATACCA-1	-15.395	4.74647
lib230331_GTGCACGAGTTCGCAT-1	-10.2708	14.3291
lib230331_GTGCTGGTCGTCACCT-1	4.55757	-31.0124
lib230331_GTGGCGTGTCTAACGT-1	11.4528	-22.6963
lib230331_GTGTGGCCAAGTGGTG-1	9.20846	-26.837
lib230331_GTGTTCCTCTGCTTTA-1	12.9478	24.9028
lib230331_GTTACCCAGACACACG-1	-6.05455	-14.3025
lib230331_GTTACCCAGGGCAATC-1	-22.7014	-6.01562
lib230331_GTTACCCGTCAAACGG-1	-0.0617248	8.1414
lib230331_GTTCCGTAGGGTGAAA-1	-23.8476	-7.15222
lib230331_GTTCCGTTCGTAGGGA-1	-9.65179	13.0195
lib230331_GTTCGCTGTAACGCGA-1	-14.1443	-11.0763
lib230331_GTTCTATAGCGGTAGT-1	-20.4186	-23.2293
lib230331_GTTGAACAGGGCTTCC-1	-9.96057	-8.71569
lib230331_GTTGAACGTTAGGCTT-1	-8.8538	14.7074
lib230331_GTTGCGGTCTGTCCGT-1	-8.86097	13.5716
lib230331_GTTGTAGGTGGCATCC-1	19.5658	-9.20865
lib230331_GTTGTCCCAAACACGG-1	-20.4036	-23.233
lib230331_GTTGTCCGTCGTTGCG-1	-24.3752	25.3476
lib230331_TAACGACTCAGTCATG-1	13.6074	25.2903
lib230331_TAACGACTCTCCACTG-1	6.63366	22.8746
lib230331_TAAGCCAAGAATTGTG-1	9.31534	23.0608
lib230331_TACCCACAGTGGATAT-1	18.8351	-23.2325
lib230331_TACCGAATCATAGACC-1	13.231	25.1509
lib230331_TACCGAATCTTGGAAC-1	-1.86172	16.5746
lib230331_TACCGGGCATACTGTG-1	8.8812	-12.3173
lib230331_TACCTCGTCTTACTGT-1	-14.0132	-11.1346
lib230331_TACTGCCGTAGTAAGT-1	-2.12856	17.0944
lib230331_TACTTACCACTGAATC-1	2.77924	-26.0434
lib230331_TAGGGTTAGTAACGTA-1	-8.64122	15.0889
lib230331_TAGTGCACATAGGTTC-1	12.7977	24.6374
lib230331_TATACCTTCAGTGTTG-1	-13.7418	4.74494
lib230331_TATCCTAGTGTAAACA-1	3.63219	8.85281
lib230331_TATTCCATCTTTACAC-1	-0.636398	-3.52199
lib230331_TCAAGCACAGTTGAAA-1	13.5322	25.1999
lib230331_TCAATTCTCTCATGCC-1	2.0528	7.4549
lib230331_TCACAAGCACATAGCT-1	-22.63	-6.00271
lib230331_TCACACCTCGGCATAT-1	0.395975	-1.81309
lib230331_TCACACCTCTCAGTCC-1	5.77238	10.5267
lib230331_TCACATTTCACCCTGT-1	16.5478	-23.1538
lib230331_TCACGCTCATCGCTGG-1	-1.15396	25.9574
lib230331_TCAGTCCCAGTCAGCC-1	12.0072	23.6152
lib230331_TCAGTGACACATAACC-1	-3.71804	-0.211932
lib230331_TCAGTGATCTGGACCG-1	12.4999	-27.1609
lib230331_TCAGTTTTCACTTCTA-1	-4.82375	15.7039
lib230331_TCATCATGTGCCTTTC-1	-2.95331	17.1011
lib230331_TCATCCGGTTCAAAGA-1	5.8082	1.39701
lib230331_TCATGCCGTATCACCA-1	10.1264	24.2462
lib230331_TCATGCCGTTTCTATC-1	-5.09438	20.9707
lib230331_TCATTCAAGGTCGCCT-1	7.90133	10.5028
lib230331_TCATTGTAGCAGCCCT-1	11.3233	25.3983
lib230331_TCATTGTTCCTCTAAT-1	9.44383	24.5728
lib230331_TCCAGAACATAGGTAA-1	-22.5959	-6.0516
lib230331_TCCATCGCATGTGGTT-1	-38.7822	-9.48405
lib230331_TCCCACAAGCGACTAG-1	-20.8917	19.6987
lib230331_TCCGATCGTTGTAAAG-1	13.9971	-26.3492
lib230331_TCCGATCGTTGTCAGT-1	-7.00002	-19.0604
lib230331_TCCTCGACAGACGCTC-1	-7.16865	17.9413
lib230331_TCCTCTTCATACAGGG-1	5.50013	-31.7382
lib230331_TCCTCTTGTAGTTCCA-1	-22.7539	-6.26382
lib230331_TCCTTCTTCACGTCCT-1	-12.5311	-20.6426
lib230331_TCGAACATCCCATTTA-1	-47.4899	-0.764543
lib230331_TCGCACTCATACACCA-1	-8.67739	-21.9748
lib230331_TCGGATATCACCTCTG-1	1.88227	-0.362878
lib230331_TCTACCGCAATTTCGG-1	16.1315	-21.8696
lib230331_TCTACCGCAGCTGTGC-1	-3.40814	17.0036
lib230331_TCTATCAAGAACAAGG-1	-8.74445	-14.4023
lib230331_TCTCAGCCAATGGCCC-1	-39.0338	-8.55301
lib230331_TCTCTGGAGAGTAACT-1	21.7002	-1.68806
lib230331_TCTGCCAAGCGGGTAT-1	-38.5733	-8.99236
lib230331_TCTGGCTAGCCACCGT-1	-8.53103	-14.4648
lib230331_TCTGTCGAGGACAACC-1	-14.3588	5.07001
lib230331_TCTGTCGAGGCCTTCG-1	11.8861	23.6161
lib230331_TCTTGCGGTCTACGTA-1	-13.7777	-10.0699
lib230331_TCTTTGACAGCTTTCC-1	-6.05574	14.975
lib230331_TCTTTGAGTCATCAGT-1	-10.0917	-0.216039
lib230331_TCTTTGATCGAGAATA-1	18.8945	-7.19747
lib230331_TGAACGTAGAGCCGAT-1	23.0587	-19.0668
lib230331_TGAATCGCAGTAGATA-1	7.43247	-14.5765
lib230331_TGAATGCGTTCGCGTG-1	19.5922	-20.4313
lib230331_TGATGCAGTAACAGGC-1	7.50402	22.5481
lib230331_TGATGGTCACCACATA-1	10.7649	24.0906
lib230331_TGATGGTTCGCATAGT-1	8.96162	11.9995
lib230331_TGATGGTTCTTGGAAC-1	-8.23854	13.2979
lib230331_TGATTTCGTTGTGCAT-1	-4.49553	-23.8125
lib230331_TGATTTCGTTTATGCG-1	7.48476	-30.1583
lib230331_TGCACGGAGGGAGGGT-1	-2.18461	8.32446
lib230331_TGCACGGCACGCAAAG-1	-38.7586	-9.24269
lib230331_TGCAGTACATCCTATT-1	-38.4254	-9.66795
lib230331_TGCATCCCAAGATCCT-1	-14.5976	5.24676
lib230331_TGCATCCGTTCTTGCC-1	6.61681	1.62342
lib230331_TGCATGACAGATCACT-1	12.4494	25.7794
lib230331_TGCGACGTCCAGTACA-1	-9.01122	13.4748
lib230331_TGCGGCACAAAGCAAT-1	15.9795	-24.0114
lib230331_TGCTCGTCATCCGAAT-1	-5.85728	-23.0074
lib230331_TGGAGAGCAATGAACA-1	13.2913	24.9578
lib230331_TGGAGAGCAGCACACC-1	13.6856	25.3134
lib230331_TGGAGGAAGCATACTC-1	-25.0622	-4.7
lib230331_TGGAGGAGTACTCCCT-1	-9.1531	13.5293
lib230331_TGGATCACAGAGAATT-1	9.66883	-29.3897
lib230331_TGGATCAGTCGACTTA-1	11.2763	25.5518
lib230331_TGGATGTTCCGACATA-1	11.1958	25.1952
lib230331_TGGGCTGTCTAGTGAC-1	16.8206	-22.8905
lib230331_TGGTACACAGGTCCCA-1	3.69609	11.6179
lib230331_TGGTACAGTGGCTGAA-1	-4.78978	0.151745
lib230331_TGGTGATAGACATCAA-1	7.09726	-1.14897
lib230331_TGTAACGTCTTAATCC-1	4.64115	2.04869
lib230331_TGTCCCAGTCCAGCGT-1	20.5394	-5.028
lib230331_TGTGAGTAGTACTCGT-1	-38.689	-9.46261
lib230331_TGTGATGCAATTGCGT-1	-14.6814	4.57963
lib230331_TGTGGCGCAAATGGTA-1	-13.6377	-10.2778
lib230331_TGTTGGAAGTGGTTCT-1	6.41572	1.32544
lib230331_TGTTGGACAGGAAGTC-1	-3.32305	21.8165
lib230331_TTACAGGCAAACTGCT-1	-16.4074	24.1545
lib230331_TTACGTTCAGCGTGCT-1	-12.4004	-20.9302
lib230331_TTCACGCGTGGCTACC-1	-5.41998	-24.7432
lib230331_TTCATTGAGACTCATC-1	-15.8051	4.81407
lib230331_TTCATTGGTTTCACAG-1	-7.16081	-24.9608
lib230331_TTCCAATGTATGGAAT-1	9.221	-30.5079
lib230331_TTCCAATTCCCGGTAG-1	6.66479	4.05947
lib230331_TTCCAATTCCGAAGGA-1	-38.8243	-8.84561
lib230331_TTCTAGTAGAGATTCA-1	-13.7513	-10.5977
lib230331_TTCTAGTCACCCTTAC-1	-8.52477	14.6242
lib230331_TTCTCTCTCCGCATAA-1	-14.9375	-23.5125
lib230331_TTGATGGAGAGCATCG-1	8.92639	-12.2849
lib230331_TTGCATTGTAAGCAAT-1	7.92678	-13.2864
lib230331_TTGTTGTAGAATCGCG-1	21.5512	-19.7397
lib230331_TTGTTGTCACCTGCAG-1	16.4228	-3.99863
lib230331_TTGTTGTGTTGTCTAG-1	10.9273	24.784
lib230331_TTTACCAGTTCTCGCT-1	-22.8506	-6.46528
lib230331_TTTACTGAGCCGTCGT-1	-0.479255	-18.511
lib230331_TTTACTGTCATACGGT-1	-1.1474	-3.97076
lib230331_TTTATGCAGGCCACCT-1	21.1022	-22.7508
lib230331_TTTATGCCAACATACC-1	-7.25898	-24.6621
lib230331_TTTATGCTCCTACGGG-1	-22.6597	-5.50479
lib230331_TTTCAGTCAGAGTGTG-1	-3.07582	-0.321371
lib230331_TTTCATGTCCGCACTT-1	-47.3209	-0.924107
lib230331_TTTCGATAGTCATAGA-1	12.788	24.8469
lib230331_TTTGTTGAGCTGCCAC-1	-6.51803	-25.1837
lib230331_AAACGCTGTCACAATC-1	4.29343	-28.232
lib230331_AACCATGTCTTAGTTC-1	0.344393	-29.3064
lib230331_AACGTCAGTACGAGTG-1	-16.712	4.62672
lib230331_ACAACCACACGTACTA-1	0.48778	-31.1861
lib230331_AGATCCAAGTTCTCTT-1	3.64995	-4.13287
lib230331_AGATCGTCATTGTACG-1	-28.2229	-4.02093
lib230331_AGGTGTTAGCTACTAC-1	4.31878	-29.3629
lib230331_AGTGATCAGGTCGACA-1	0.399426	-29.1823
lib230331_ATATCCTTCCGTGTAA-1	7.63505	-26.8754
lib230331_ATCCACCTCCATTGGA-1	-4.10724	-22.4382
lib230331_ATCCCTGCATTGAAAG-1	7.52872	-24.5757
lib230331_ATCTTCAAGCACACAG-1	-0.966002	-24.2124
lib230331_ATTGGGTAGTCAGGGT-1	11.5248	-31.5331
lib230331_ATTTACCCATACAGAA-1	1.58601	-31.0272
lib230331_ATTTCTGGTGGCCTCA-1	4.62893	-25.0754
lib230331_CACCGTTTCGAGCCTG-1	-27.9962	-5.87011
lib230331_CACTGTCAGGAGAATG-1	11.157	-3.46556
lib230331_CAGGGCTTCAGTGCGC-1	-14.7182	5.82708
lib230331_CATCCCATCCGATAAC-1	-28.0671	-5.92917
lib230331_CATGGATTCCCATTCG-1	11.0256	-32.355
lib230331_CCAATGAAGTAAACTG-1	-28.0564	-5.89899
lib230331_CCAATTTTCGGACCAC-1	3.45681	-26.9439
lib230331_CCATAAGAGACTTGTC-1	5.32308	-8.47093
lib230331_CCGATGGGTACACGCC-1	-2.89762	-25.3173
lib230331_CCGGTGATCACCTGGG-1	-0.173889	-3.65495
lib230331_CCTAACCCACGCACCA-1	12.1525	-18.1859
lib230331_CCTCCTCCACTACGGC-1	19.7987	8.33831
lib230331_CGAGGCTCAGTGGCTC-1	4.73899	-29.918
lib230331_CGAGTGCTCACTGCTC-1	-12.9966	-15.0678
lib230331_CGAGTTACACATCATG-1	1.58113	-10.5209
lib230331_CGGAATTTCGCTGACG-1	-26.9087	-2.75194
lib230331_CGTTGGGTCAACCGAT-1	1.94914	-31.8316
lib230331_CTACATTAGACCAGAC-1	-2.18455	-24.5986
lib230331_CTACATTTCGACCCAG-1	5.75158	-28.1326
lib230331_CTACATTTCTTGCAAG-1	10.0332	-7.94814
lib230331_CTACCTGTCTGGGATT-1	5.67899	-24.6559
lib230331_CTAGACAAGCGCTTCG-1	5.99142	-29.3282
lib230331_CTCAAGAGTAATGATG-1	-27.5864	-2.39655
lib230331_CTGCTCACAGCTTCGG-1	14.1747	-19.2441
lib230331_CTGTACCGTTACCGTA-1	-14.8724	4.95005
lib230331_CTTCAATGTCCACAGC-1	10.6288	-8.45857
lib230331_CTTTCGGTCTCATGCC-1	4.41577	6.46768
lib230331_GAACACTCAACGTATC-1	3.4947	-4.07464
lib230331_GACTCAAGTACCATAC-1	4.86186	-6.47538
lib230331_GAGGCAACAGCTAACT-1	-4.24436	-19.2911
lib230331_GAGGGATCAACTCCAA-1	4.12312	-29.014
lib230331_GATTCGACAGCAGACA-1	-15.055	5.04746
lib230331_GATTTCTAGACTCTTG-1	0.557462	-29.4766
lib230331_GCAACATCAATCGCAT-1	12.1997	5.36886
lib230331_GCACATAAGGAAGTAG-1	-0.0691168	-31.2998
lib230331_GCCAACGTCGTGACTA-1	-24.2716	-7.29866
lib230331_GCCTGTTGTAGATGTA-1	0.986287	-3.256
lib230331_GCGATCGAGGACAAGA-1	17.7172	-24.3337
lib230331_GCTCAAAAGCACACAG-1	-4.15837	-23.68
lib230331_GGAGGATAGACTACGG-1	-14.8876	5.14767
lib230331_GGGTTATGTTCCGGTG-1	-4.36138	-21.7427
lib230331_GGTGATTAGAAGCTGC-1	15.8247	-23.0917
lib230331_GTAACCAAGATGCTGG-1	10.8964	0.710528
lib230331_GTCCTCAAGGAAAGGT-1	7.49413	-23.2883
lib230331_GTGGAGAGTTGTGGCC-1	1.84942	-5.49045
lib230331_GTGTAACTCACTCTTA-1	20.316	-14.6723
lib230331_TAACCAGCATGTAACC-1	5.12463	-27.0943
lib230331_TAACGACAGGATACCG-1	12.8077	-17.2107
lib230331_TAAGCCAGTTTACCTT-1	-14.7674	-11.2028
lib230331_TACCGGGAGTCATAGA-1	-9.69826	-0.42662
lib230331_TACCGGGAGTCATGGA-1	-4.7896	-1.05993
lib230331_TCAATTCCAATCCTTT-1	-6.41455	-14.6311
lib230331_TCACGGGTCCGAAGGA-1	14.5736	-26.2222
lib230331_TCAGCCTAGTTATGGA-1	4.18922	-25.9714
lib230331_TCCTTCTTCCATACTT-1	-5.24339	-15.3274
lib230331_TCCTTTCAGTCGCCAC-1	-0.0929008	-31.12
lib230331_TCGATTTTCATGCCGG-1	13.3385	-17.213
lib230331_TCGGGACAGACCATAA-1	11.3544	-28.6412
lib230331_TCTACATCATCCGAGC-1	6.49592	-27.3005
lib230331_TCTCTGGTCCAACTGA-1	-21.389	-8.85641
lib230331_TCTCTGGTCTTTGCGC-1	11.4062	2.14716
lib230331_TCTGCCAAGCGTCAAG-1	-28.0532	-5.90028
lib230331_TGAGCATCATGTTCAG-1	4.5435	-29.7501
lib230331_TGCGGCACAGCAGGAT-1	-0.483219	-22.3998
lib230331_TGCTCGTCATCCGATA-1	13.2868	-18.4013
lib230331_TGCTTGCCACGATTCA-1	-0.141824	-31.1879
lib230331_TGGGAGACAGATAAAC-1	-5.24988	-18.8201
lib230331_TGGGTTAGTGCCGTAC-1	2.99376	-5.71771
lib230331_TTAATCCTCGCTCTCA-1	-5.97624	-0.197114
lib230331_TTAATCCTCTACAGGT-1	11.4849	-25.6139
lib230331_TTACGCCCACGTGTGC-1	6.27968	0.652655
lib230331_TTCATGTTCCTGGGTG-1	17.4661	-25.4267
lib230331_TTCATTGTCCTTATGT-1	-3.66445	-27.3865
lib230331_TTCTAGTTCACTGAAC-1	4.72974	-26.6458
lib230331_TTGGGCGTCCCGATCT-1	-28.0463	-5.84385
lib230331_TTTACGTTCTGAACGT-1	0.996984	-29.7113
lib230331_AAACCCATCTCCCAAC-1	-34.0647	13.4331
lib230331_AACCACATCAGGACAG-1	4.72092	7.93113
lib230331_AACGGGATCTAAGAAG-1	52.3652	-2.21574
lib230331_AATGGCTGTTTGAACC-1	-28.0585	-4.54493
lib230331_ACACAGTCAGGCCCTA-1	-46.8404	0.37699
lib230331_ACCCTCATCCGACGGT-1	-30.9422	9.38908
lib230331_ACCCTCATCTTGGTGA-1	-4.29932	-27.1725
lib230331_ACTTCCGCATAATGAG-1	-19.6878	13.4146
lib230331_AGACACTGTACTAGCT-1	5.49332	5.55677
lib230331_AGAGCCCAGAAGCGCT-1	-11.9679	20.4264
lib230331_AGGGCTCGTAGCGTAG-1	9.33585	-24.5292
lib230331_AGGGTTTAGAAGCTCG-1	-23.2961	21.4982
lib230331_AGTCATGTCTGTCGTC-1	-23.6111	-7.26561
lib230331_ATACTTCAGAAGGGAT-1	5.16374	4.71744
lib230331_ATCATTCCAAGAAACT-1	1.67679	6.92471
lib230331_ATGGAGGTCGGAGATG-1	-18.221	13.4928
lib230331_ATGGTTGTCACGAGGA-1	-22.3844	-5.56802
lib230331_CAGGCCAAGCGTGAAC-1	-22.5558	20.8123
lib230331_CATTTCAGTCGTCATA-1	-19.6988	-24.5275
lib230331_CCGATGGGTGTCTCCT-1	-28.9946	6.31689
lib230331_CCGGTAGTCCGGCTTT-1	-21.8886	-22.4033
lib230331_CCGTGAGCACTTGGCG-1	-6.56579	-14.2377
lib230331_CGAGGAATCGACGCTG-1	0.810171	1.89265
lib230331_CGGGTGTTCCCGAGAC-1	-9.27242	-1.25077
lib230331_CTACATTTCAAAGACA-1	-22.0257	20.5971
lib230331_CTCCAACGTTCGGACC-1	-13.7733	-11.1244
lib230331_CTCGAGGCACCAAAGG-1	30.0666	-3.78556
lib230331_CTGTGAACACTGAGTT-1	-44.9208	-5.52699
lib230331_CTTCTAAGTGCATACT-1	-10.1299	-11.4461
lib230331_CTTTCGGTCGCGTGAC-1	52.6387	-2.20219
lib230331_GACCAATCACTTGGGC-1	-45.9106	1.11606
lib230331_GAGAAATGTCTGTGAT-1	-1.57968	6.68965
lib230331_GATCCCTGTGTGTCCG-1	-9.63454	-1.40903
lib230331_GATGCTATCATGAGGG-1	-46.183	1.4433
lib230331_GCAGCCATCTCCAATT-1	-19.7234	13.3282
lib230331_GCATCTCAGGGATGTC-1	-0.376284	8.98033
lib230331_GGAACCCAGTACCCTA-1	-15.6517	5.03177
lib230331_GGAATCTCAATCGTCA-1	-4.49075	-0.544246
lib230331_GGCGTCAGTTCCGCGA-1	-18.4634	11.4608
lib230331_GGTCTGGCAGTCGCTG-1	5.24887	8.97865
lib230331_GTCCACTCACTTTAGG-1	-26.8737	-2.72049
lib230331_GTGAGCCCAATAGTAG-1	-0.472147	-31.3234
lib230331_GTTGCTCGTACGCTTA-1	-18.9322	12.6179
lib230331_TAACACGCATCGCTAA-1	5.61189	6.1439
lib230331_TACAACGTCTGAGGTT-1	-0.246181	-2.28636
lib230331_TACACCCAGATTGATG-1	-19.7793	13.3709
lib230331_TACGGTAAGGCGCTCT-1	-14.6493	-22.276
lib230331_TACTTACGTAGCGTTT-1	-0.23911	-2.11951
lib230331_TCACGCTAGGTTGACG-1	-11.2311	14.6584
lib230331_TCATACTGTTTACGAC-1	-18.0637	12.2464
lib230331_TCATATCTCTCCCAAC-1	-17.8509	13.2729
lib230331_TCGACGGCATAGTCGT-1	-0.31521	7.55717
lib230331_TCTAACTCAGTCACGC-1	-39.5254	-8.36646
lib230331_TGAACGTAGGTTGAGC-1	-8.52082	-13.1192
lib230331_TGGGAGATCGTGTCAA-1	-44.7608	-5.35773
lib230331_TGGGCTGAGCACTAGG-1	-5.7884	-0.0648118
lib230331_TGGGCTGCACTGGCCA-1	-25.791	-3.47696
lib230331_TGTGAGTCAGGAATCG-1	-1.44154	6.4504
lib230331_TGTTCATGTTCCGTTC-1	-19.3341	-24.6402
lib230331_TTATTGCAGACGCCCT-1	2.95033	7.87449
lib230331_TTCCAATCAAGATGTA-1	-19.3654	12.9951
lib230331_AAAGTGACATGGGAAC-1	20.4616	5.56844
lib230331_AACAACCGTAATTGGA-1	4.82262	3.98372
lib230331_AACACACCAGCTACCG-1	-33.9092	10.829
lib230331_AACGAAAGTGGGCTCT-1	13.5617	-2.6181
lib230331_AAGACTCAGGTTCTCG-1	-24.8188	-2.14554
lib230331_AAGACTCAGGTTCTTG-1	-27.3329	-3.54481
lib230331_AAGATAGAGACTCTTG-1	2.23287	-30.6774
lib230331_AAGTTCGCAGCAGTAG-1	-32.1397	12.3693
lib230331_AATGAAGAGTCCCAAT-1	-13.8334	-10.7812
lib230331_ACAAGCTCAGGTGGAT-1	1.81787	-29.7376
lib230331_ACACCAATCGGTGTTA-1	-0.322684	6.43478
lib230331_ACAGGGAGTGCGACAA-1	-16.6063	23.6547
lib230331_ACATCCCAGGCTATCT-1	9.85846	1.07361
lib230331_ACATCCCAGTTGGACG-1	-12.6251	18.2229
lib230331_ACATGCAAGACGACGT-1	20.3112	-15.7324
lib230331_ACCATTTTCCGTGGTG-1	7.84891	11.5362
lib230331_ACCCTTGCAGAGTCAG-1	13.9189	-24.2227
lib230331_ACCTACCGTTCGTACA-1	-13.8878	-10.5771
lib230331_ACCTACCTCATGCCGG-1	14.1626	4.9625
lib230331_ACGCACGCAAACGGCA-1	-5.18211	32.4177
lib230331_ACGGTTAAGGTAAAGG-1	-8.05061	-17.1907
lib230331_ACGTAACGTGACACAG-1	-7.03501	-20.0712
lib230331_ACGTTCCGTTACGGAG-1	12.5126	1.10878
lib230331_ACTGATGGTCACTTAG-1	-32.5854	10.0385
lib230331_ACTGCAAGTGGCCACT-1	-0.333206	-3.00913
lib230331_ACTGTGAGTTTCTTAC-1	12.8749	-7.95042
lib230331_ACTTCCGCAAAGGCTG-1	-9.22841	-28.0979
lib230331_ACTTCGCGTAATCAAG-1	-12.1124	-22.9692
lib230331_AGAACAACATTATGCG-1	2.22617	-5.42145
lib230331_AGACCATCAGACGATG-1	23.3554	-3.98687
lib230331_AGACTCAGTAGTGTGG-1	8.97244	2.08424
lib230331_AGAGAGCCACCCTAGG-1	13.0112	-24.1083
lib230331_AGATCCAGTAATGTGA-1	-25.592	-4.68144
lib230331_AGATCGTAGTACAACA-1	12.2214	1.28534
lib230331_AGCATCAAGCACGTCC-1	9.56149	-23.417
lib230331_AGCGCTGGTTAGAAAC-1	-0.558277	-2.74423
lib230331_AGCGCTGTCTCTATAC-1	18.538	-20.8649
lib230331_AGGAATAGTCCTCCTA-1	26.2598	0.581458
lib230331_AGGAGGTGTGCCTTCT-1	2.99099	-29.4512
lib230331_AGGATAATCAAGTCTG-1	-12.7638	-11.1855
lib230331_AGGGAGTTCAAGTCTG-1	5.60929	8.88924
lib230331_AGGGCTCGTTAAGACA-1	-4.31373	-0.912716
lib230331_AGGGTGAAGTTGCGCC-1	13.2699	-26.3112
lib230331_AGGGTTTCATGCCATA-1	-42.1317	-4.24977
lib230331_AGGTAGGTCAAGTAAG-1	-33.9474	13.4171
lib230331_AGGTTACGTACCCGAC-1	-7.1226	-19.4663
lib230331_AGTAGTCGTAGGAAAG-1	4.27961	-4.64033
lib230331_AGTGCCGTCTAAGCCA-1	-33.8871	13.3269
lib230331_AGTGTTGCACCCTTAC-1	-20.0585	28.3978
lib230331_ATACCTTCACTCATAG-1	21.039	-3.69203
lib230331_ATACTTCCACAGCTGC-1	9.57513	-25.0639
lib230331_ATAGACCAGAGTCTGG-1	8.36284	-26.1829
lib230331_ATAGAGAGTGTGTCCG-1	13.512	-3.46027
lib230331_ATATCCTAGTTCTACG-1	-40.4935	-6.62989
lib230331_ATCACGATCATTCGTT-1	7.43342	-26.6269
lib230331_ATCGATGGTGTGCTTA-1	8.94518	-1.60077
lib230331_ATCGCCTCAAGGCAAC-1	-16.7908	27.8053
lib230331_ATCGCCTCAGTGGCTC-1	6.93624	-26.7772
lib230331_ATCGGATCAGTGCCTG-1	-16.2418	28.7323
lib230331_ATCGTAGAGTCGCCCA-1	-1.11905	5.96367
lib230331_ATCGTCCAGGCTCCCA-1	0.17771	-3.57126
lib230331_ATCGTGACAGAGAAAG-1	-21.6908	18.1298
lib230331_ATCTTCAGTGAGGCAT-1	-24.0974	25.8553
lib230331_ATGACCACATGGCCAC-1	2.81695	-30.726
lib230331_ATGCGATGTTCTAACG-1	-4.59346	21.307
lib230331_ATGGGAGGTTCGGCCA-1	19.1467	-5.26448
lib230331_ATTATCCAGTGATAAC-1	0.460863	-30.2085
lib230331_ATTCCATGTTGCTCGG-1	-13.9164	-21.7077
lib230331_ATTCTTGCAACTTCTT-1	-22.6274	30.349
lib230331_ATTTACCGTGCATCTA-1	6.04218	-28.4293
lib230331_CAAGAGGTCAACACGT-1	-6.73516	-16.7695
lib230331_CAAGCTAGTAATGATG-1	11.8433	-24.9092
lib230331_CAATTTCCATAACAGA-1	-0.598232	-1.41244
lib230331_CACAGATAGAGGGCGA-1	18.5092	-20.6896
lib230331_CACAGATTCCACTTCG-1	9.85295	-2.61207
lib230331_CACAGATTCCTTACCG-1	-0.533584	-4.14014
lib230331_CACAGGCAGCCACAAG-1	10.4556	1.92632
lib230331_CACAGGCTCAGCTGTA-1	13.5976	0.13651
lib230331_CACGGGTAGCACCGTC-1	6.59092	4.39445
lib230331_CACGGGTCACATGTTG-1	-42.0169	-4.13206
lib230331_CAGATACTCACGAGGA-1	-20.1694	28.5136
lib230331_CAGATTGGTCATCAGT-1	9.93163	-25.0244
lib230331_CAGGCCACATGCTGCG-1	-20.9571	-8.90889
lib230331_CAGGTATCATAGTCAC-1	-43.9474	-4.32674
lib230331_CATACAGTCAGCTTCC-1	-1.55138	2.20493
lib230331_CATAGACCAGACCTAT-1	0.946408	-4.15323
lib230331_CATCCACCACCACTGG-1	19.4341	1.44231
lib230331_CATCCACCACCAGGTC-1	-17.9617	25.891
lib230331_CATCCACGTGGTCCCA-1	-2.84356	19.3205
lib230331_CATCGGGAGCGGATCA-1	6.55172	-3.21027
lib230331_CATCGTCCAACCGTGC-1	-21.422	-9.01165
lib230331_CATGAGTAGGCTGGAT-1	21.0403	-7.50009
lib230331_CATGCAACACCGTGCA-1	23.061	-17.1053
lib230331_CATGCGGCATCCGTGG-1	2.82211	-23.4789
lib230331_CATTCCGGTCGAGTGA-1	13.3091	-25.1765
lib230331_CCAATGAGTTGTGGCC-1	13.9362	-1.86857
lib230331_CCACCATAGATGAACT-1	-32.1552	12.1028
lib230331_CCATCACTCATTTACC-1	23.2193	-7.04201
lib230331_CCCGAAGCAAGGCAAC-1	-11.5978	-14.2317
lib230331_CCCGAAGTCCAGCCTT-1	-0.448337	-4.17504
lib230331_CCCTAACTCATTGTGG-1	16.9962	-19.1819
lib230331_CCGTTCAGTCCTATAG-1	-22.837	-2.04636
lib230331_CCTACGTAGGATGTTA-1	19.2042	-18.9013
lib230331_CCTATCGAGTTGGACG-1	-18.4323	11.9008
lib230331_CCTCAACCAGGTTCAT-1	3.86691	-2.11352
lib230331_CCTCTAGGTGGTGATG-1	2.72087	9.10284
lib230331_CCTCTAGTCTTACGTT-1	22.6795	-17.0669
lib230331_CCTGTTGCAGATTAAG-1	-44.1737	-3.87751
lib230331_CGAAGTTCATTCTCCG-1	12.2327	-23.3602
lib230331_CGAGAAGTCCATCCGT-1	21.6772	0.00542633
lib230331_CGATGCGAGTGGATTA-1	-12.6163	15.2086
lib230331_CGCATAAAGGCCTTCG-1	-0.744387	-2.19338
lib230331_CGCATAAGTGGCTGCT-1	15.348	-18.6621
lib230331_CGCGTGAAGCACCGAA-1	-43.6775	-4.15772
lib230331_CGGACACAGCATCAAA-1	-1.24141	6.05463
lib230331_CGGAGAATCGGAGCAA-1	16.2397	-4.75413
lib230331_CGTCAAAAGTACTGTC-1	3.38456	5.65578
lib230331_CGTGTCTGTTACGCCG-1	-7.08765	-14.7605
lib230331_CTAACTTCAGCTTTCC-1	-41.7181	-6.30825
lib230331_CTAGACAGTGCCTAAT-1	13.6319	-26.4401
lib230331_CTATCTACACAGCCAC-1	-13.6411	-10.8884
lib230331_CTCACTGAGAGTCTGG-1	6.62744	-29.7059
lib230331_CTCAGGGTCGTCACCT-1	-0.990184	-4.36822
lib230331_CTCATGCTCGAAGTGG-1	2.72699	8.66151
lib230331_CTCCATGAGTGGCAGT-1	-8.00473	12.757
lib230331_CTCGAGGCAATCCTAG-1	-44.2107	-4.55477
lib230331_CTCTCAGAGTCATCGT-1	-11.9578	14.9232
lib230331_CTGAGCGAGGGAGGGT-1	9.79737	-2.20647
lib230331_CTGCCTATCATCCTGC-1	-12.0525	-11.8355
lib230331_CTGGCAGTCCCTTGGT-1	9.413	-0.0813295
lib230331_CTGTATTTCAATCAGC-1	1.19034	-3.68346
lib230331_CTTCCTTAGCTTTGTG-1	-8.50046	-22.3098
lib230331_CTTCCTTAGTCCTACA-1	-42.4429	-5.94797
lib230331_CTTCTCTCACACCTAA-1	-11.3219	-25.3842
lib230331_CTTGAGAGTCAGGAGT-1	24.3685	-3.08375
lib230331_CTTTCAATCGAACCTA-1	7.51917	0.372942
lib230331_GAAACCTAGATTAGTG-1	11.7031	1.67965
lib230331_GAATCGTTCGGCATCG-1	16.2454	-18.0633
lib230331_GACACGCTCTTCGTAT-1	-13.5098	26.6518
lib230331_GACATCAAGGATATGT-1	-13.5986	16.6231
lib230331_GACATCACAAATGGTA-1	6.13579	-26.4325
lib230331_GACCGTGAGCACACAG-1	-5.1127	-20.4431
lib230331_GACCTTCTCCATCGTC-1	-18.5919	31.8974
lib230331_GACGCTGCAGATCATC-1	-15.3998	5.09502
lib230331_GAGAAATAGTCAATCC-1	15.6836	-23.0238
lib230331_GAGAAATCAAAGAACT-1	3.12933	-29.4981
lib230331_GAGAGGTAGAGCACTG-1	3.65065	7.84444
lib230331_GAGAGGTGTTGCGTAT-1	1.32437	-29.6649
lib230331_GAGGGATCAGAAACCG-1	-7.74313	-1.16931
lib230331_GAGGGTATCCTACCAC-1	15.8777	-6.37148
lib230331_GAGTGTTCACATATCG-1	18.2831	-0.747935
lib230331_GAGTTGTCAACGGTAG-1	13.8234	-21.3681
lib230331_GATGACTTCAGTCACA-1	-43.3542	-4.77023
lib230331_GATGTTGCAACGATTC-1	-1.1204	6.29386
lib230331_GATGTTGCAGCTGTAT-1	-10.7127	-12.8496
lib230331_GATTCTTTCCGACATA-1	-10.0928	-0.780182
lib230331_GATTTCTGTTATCTGG-1	13.26	0.168226
lib230331_GCACGGTCAGGAACCA-1	-24.2176	25.7326
lib230331_GCAGCTGTCGGTCTGG-1	12.7783	-1.48399
lib230331_GCCAGCAGTCCGCAGT-1	13.9694	-24.3749
lib230331_GCCATTCAGACAACTA-1	-18.539	-23.3201
lib230331_GCCATTCGTGAAGCGT-1	20.5583	-13.6812
lib230331_GCGATCGAGCGCCCAT-1	-11.6078	-7.19955
lib230331_GCTACCTCACCGGAAA-1	-4.77095	0.300994
lib230331_GCTCAAAGTGAATGAT-1	-11.4501	-7.28426
lib230331_GCTGAATAGATGACCG-1	-9.94474	-15.8428
lib230331_GGAATGGCAAACGGCA-1	12.9521	-20.6274
lib230331_GGATGTTAGTCACAGG-1	6.58472	-27.0858
lib230331_GGCTGTGCAATAACGA-1	-3.55076	8.03622
lib230331_GGCTTGGTCACCATGA-1	3.22263	-29.3061
lib230331_GGGACCTTCTCATTAC-1	8.75829	-2.72124
lib230331_GGGCCATTCAAGGAGC-1	9.0391	-23.5181
lib230331_GGGTGAACACACCGCA-1	8.92815	-27.4861
lib230331_GGGTGAACATCATTGG-1	7.66599	-0.199127
lib230331_GGTGAAGAGTAGAATC-1	-11.4488	-14.05
lib230331_GTAATGCTCTTTCGAT-1	-43.7741	-4.53289
lib230331_GTACAACAGAACTCCT-1	1.9186	-30.4369
lib230331_GTACAGTTCGCACGAC-1	0.279167	-2.73366
lib230331_GTAGAGGAGGAACTCG-1	-33.7342	14.0763
lib230331_GTAGCTATCACCTCGT-1	8.7423	1.84086
lib230331_GTATTTCTCTCTAGGA-1	-7.79932	-0.76267
lib230331_GTCATCCAGGTTGGAC-1	15.2508	1.13506
lib230331_GTCGTAAGTCATTGCA-1	5.81983	0.538413
lib230331_GTCGTTCGTCGTACTA-1	7.5409	-26.814
lib230331_GTCTGTCAGTTCATGC-1	6.31573	-1.0797
lib230331_GTCTGTCCAAGAGTAT-1	11.3496	0.287461
lib230331_GTGAGTTTCACCATCC-1	22.2513	-20.755
lib230331_GTGCTGGCAACCGGAA-1	4.48141	-0.900555
lib230331_GTGGTTATCAGTCTTT-1	8.70998	12.5662
lib230331_GTGTGATCACTCCTTG-1	5.44142	-27.0088
lib230331_GTGTGGCCAGACTGCC-1	6.17389	-1.61613
lib230331_GTTACGAAGAGAGGGC-1	22.5569	-8.44653
lib230331_GTTACGAGTTCTCCAC-1	7.71925	-2.59828
lib230331_GTTAGACCACGCAGTC-1	-12.7168	-12.2654
lib230331_GTTCATTAGACCAGAC-1	2.53569	9.78714
lib230331_GTTCGCTCAATAGTAG-1	15.7061	-17.1371
lib230331_GTTGTGAAGACGCATG-1	-40.9344	-6.37434
lib230331_TAAGCGTCACCAAAGG-1	21.3582	-4.72263
lib230331_TACCCACTCTCCGAGG-1	-4.22652	18.9584
lib230331_TACCCGTCATCTAGAC-1	2.46606	-2.69617
lib230331_TACCGAAGTAACAAGT-1	9.40536	-0.0430458
lib230331_TACCGGGGTAGCGTAG-1	12.8163	5.19774
lib230331_TACCTGCCATACTGAC-1	-21.4196	-9.01437
lib230331_TACGGTATCAACCTCC-1	-34.3322	12.6427
lib230331_TACTTCAGTGAGCAGT-1	-11.7652	-7.32487
lib230331_TACTTCATCGGTGTAT-1	3.84787	-27.9382
lib230331_TAGACTGAGCTAATCC-1	0.890104	-30.8393
lib230331_TAGAGTCAGGATGGCT-1	7.90098	-26.1268
lib230331_TAGGTACCATAAGCAA-1	-4.2131	-0.26571
lib230331_TAGTGCACACATGACT-1	13.7758	-3.24484
lib230331_TATCTGTAGCCGATCC-1	-3.40325	1.15305
lib230331_TATCTGTCACACTGGC-1	-14.4356	5.52946
lib230331_TATCTGTCATCACCAA-1	22.4148	-15.3315
lib230331_TATCTTGCATGAAGGC-1	10.7797	-24.7564
lib230331_TATGTTCGTATTAAGG-1	8.73939	-25.4285
lib230331_TATGTTCGTCTACTGA-1	-7.92846	-1.07506
lib230331_TATTCCATCGTCCATC-1	-20.2941	28.6534
lib230331_TATTGCTAGTCATACC-1	0.556047	-27.9423
lib230331_TCAATCTGTGTGTGTT-1	9.28942	-4.14094
lib230331_TCACAAGAGTGCGACA-1	24.6149	-12.7441
lib230331_TCACGCTCAACCGCCA-1	26.1702	0.547868
lib230331_TCACTCGAGGTTCAGG-1	5.19717	-2.8082
lib230331_TCAGGTAGTATTCCTT-1	6.45199	-2.29164
lib230331_TCAGGTAGTGGCATCC-1	-8.92404	-13.157
lib230331_TCATCCGCACAGTCCG-1	22.8491	-16.4172
lib230331_TCATTCACAACTGCTA-1	7.46858	-0.0482389
lib230331_TCCAGAACAGCAGGAT-1	-9.96088	-18.7517
lib230331_TCCCAGTCAACTAGAA-1	2.13529	-30.3156
lib230331_TCCCAGTTCTAGTTCT-1	-6.23802	-13.826
lib230331_TCCCATGGTCGTGATT-1	7.90531	-27.0696
lib230331_TCCGATCAGTTCCAGT-1	15.6156	-15.1955
lib230331_TCCTGCATCGGCGATC-1	27.5937	0.362545
lib230331_TCCTTCTGTATTTCCT-1	-11.1212	-19.7136
lib230331_TCCTTTCCATGAAGGC-1	3.06613	-1.94147
lib230331_TCGAACACAAGCGGAT-1	-5.39222	-13.5321
lib230331_TCGCACTTCCATTCGC-1	0.385033	-2.02604
lib230331_TCGCTCATCCTTTAGT-1	3.16921	-26.6103
lib230331_TCGGTCTAGTTGTAAG-1	9.70804	1.80225
lib230331_TCTAACTGTTGACTAC-1	15.1667	-0.83256
lib230331_TCTATACGTTCCAAAC-1	3.96394	-27.3973
lib230331_TCTATCATCTGTCGCT-1	8.51042	1.95427
lib230331_TCTCACGCAACAGATA-1	-43.8121	-4.27339
lib230331_TCTCAGCAGGTGATAT-1	17.5606	0.646022
lib230331_TCTCAGCGTCAACACT-1	-11.6616	-7.44362
lib230331_TCTCCGAAGTTTAGGA-1	1.71411	-30.9196
lib230331_TCTCTGGTCGAATGCT-1	2.73743	-30.2649
lib230331_TCTGCCATCACGACTA-1	-17.6487	11.6865
lib230331_TCTTAGTCATGGCTGC-1	-4.64942	-2.73251
lib230331_TGAGACTCAAATCAGA-1	-8.91437	-0.684891
lib230331_TGAGCGCCATCGGATT-1	-12.3318	-12.4815
lib230331_TGATTCTGTATCTCGA-1	15.3759	-16.3899
lib230331_TGATTCTTCAGCTGTA-1	-18.2681	10.8684
lib230331_TGATTTCCAACAACAA-1	4.0798	-5.71467
lib230331_TGCAGGCTCTTACGGA-1	9.29169	-28.371
lib230331_TGCATCCCAATCCAGT-1	7.51202	2.73715
lib230331_TGCCGAGAGGTGTGAC-1	-5.87769	-0.0438518
lib230331_TGCCGAGAGTAGACAT-1	5.17401	-29.2274
lib230331_TGCGGCAGTATCGCTA-1	-23.1783	25.134
lib230331_TGCGGGTCAGTAACAA-1	6.19545	-28.9875
lib230331_TGCTGAAAGGATACAT-1	-5.94629	17.5199
lib230331_TGGAACTAGTAACGTA-1	-16.2886	28.8707
lib230331_TGGGATTTCTTACCGC-1	20.6298	-0.311385
lib230331_TGTCCACAGGCCATAG-1	8.97584	-2.71888
lib230331_TGTCCCAGTCATTCCC-1	-8.78476	-13.4829
lib230331_TGTCCTGGTCCCGGTA-1	5.60146	-2.39749
lib230331_TGTGAGTCACCATTCC-1	-1.27072	8.15628
lib230331_TGTGGCGGTGGTTCTA-1	11.6873	-0.944466
lib230331_TGTTCATTCAAGCTTG-1	1.58781	-30.9084
lib230331_TTACCGCTCGTGCAGC-1	12.7877	-1.00298
lib230331_TTACGCCCACAGTCCG-1	-0.145525	-3.46337
lib230331_TTCAATCTCGATCCCT-1	4.07126	-29.2323
lib230331_TTCATGTGTCTACGTA-1	6.35786	10.1647
lib230331_TTCGGTCCATGCCATA-1	2.84174	-1.9559
lib230331_TTCGGTCGTTCCCAAA-1	-12.3795	-13.6854
lib230331_TTCTCTCCATGACAGG-1	-11.7035	-22.0197
lib230331_TTGCATTAGCATACTC-1	9.10061	-11.1042
lib230331_TTGCCTGAGTAGATCA-1	-8.88973	-0.734242
lib230331_TTGCGTCAGAGGATCC-1	-18.0463	10.6396
lib230331_TTGGATGAGGGAGATA-1	16.3406	-1.23759
lib230331_TTGGATGCAGAGGCAT-1	-34.5055	12.5832
lib230331_TTGTTTGGTATCGTGT-1	14.9973	-22.1761
lib230331_AACGAAACAATGTTGC-1	-12.8989	6.49986
lib230331_AAGACAACACATACTG-1	-33.762	10.9938
lib230331_AAGCCATGTGGATTTC-1	-32.2211	9.3687
lib230331_AATGCCACATCTAACG-1	-6.47322	15.6302
lib230331_ACAGAAAGTCTTCTAT-1	-33.784	12.4605
lib230331_ACATCCCTCCTTTAGT-1	-33.8918	11.1857
lib230331_ACATTTCAGTCTACCA-1	-4.96991	-0.450829
lib230331_ACCAACATCTGGCCGA-1	-33.5784	11.4322
lib230331_ACCTGAATCCTACTGC-1	-8.68167	9.51343
lib230331_ACCTGTCCAGAACCGA-1	-9.68698	8.64899
lib230331_ACGTACACAGGAGACT-1	-11.2068	7.66895
lib230331_AGAACCTGTCAGGAGT-1	-34.4011	12.7432
lib230331_AGCCAGCCACAGAAGC-1	-10.4422	7.86557
lib230331_AGCGCCAAGCTAAGTA-1	-11.415	7.52296
lib230331_AGGACTTGTTGGGCCT-1	-10.4898	7.74668
lib230331_AGGTCTAAGGATTCAA-1	-10.813	7.86334
lib230331_AGGTTACAGACCAACG-1	-8.84339	9.57636
lib230331_AGTAGTCAGTGTTCCA-1	1.81935	-0.817513
lib230331_AGTCACAAGCCTGACC-1	-11.0524	7.87647
lib230331_ATCACGAAGGAGTCTG-1	5.70296	-2.25466
lib230331_ATCCATTTCGCGTAGC-1	-8.42373	9.6323
lib230331_ATCGTGATCGAGCTGC-1	-10.2872	8.84593
lib230331_ATCTTCAGTACCACGC-1	-11.1567	7.79028
lib230331_ATGTCTTCATTATGCG-1	-31.7644	10.8365
lib230331_ATTGTTCAGGAACGCT-1	-9.85802	9.48173
lib230331_CAAAGAACAAATACGA-1	-21.8737	-22.4496
lib230331_CACCGTTGTTGCGTAT-1	-10.5708	8.61385
lib230331_CAGTTAGGTACGGATG-1	-9.50806	-1.22349
lib230331_CATACCCGTTCTCAGA-1	-10.5738	8.57333
lib230331_CATAGACCACTACTTT-1	-8.7785	8.69099
lib230331_CCGGGTATCATGACAC-1	-32.4278	11.2252
lib230331_CCTACGTTCCTCAGGG-1	-33.5976	10.281
lib230331_CGCAGGTCAGTGGCTC-1	-10.8017	7.98893
lib230331_CGCCATTAGGCCACTC-1	-24.3483	25.5863
lib230331_CGGCAGTCATTCTCCG-1	-20.3346	-22.1022
lib230331_CGTAATGAGTCACTCA-1	-34.2679	12.5721
lib230331_CGTGCTTAGTGGTGAC-1	-22.7165	-6.3425
lib230331_CGTTGGGAGTGTTCCA-1	-32.6267	9.55145
lib230331_CGTTGGGGTTGGCCTG-1	-8.58695	9.5725
lib230331_CTAGGTACAACCCGCA-1	-0.68265	-3.20947
lib230331_CTATCCGCAATCTCGA-1	-3.17681	-0.361871
lib230331_CTCATCGAGTCCCAAT-1	-9.57262	8.66456
lib230331_CTCTCGATCTCTGACC-1	-9.28112	8.82158
lib230331_CTGAGGCAGATAGTGT-1	-12.1446	6.92992
lib230331_CTGTAGAGTGCCTAAT-1	-17.5719	10.5486
lib230331_GAAGGACTCCCAAGCG-1	-12.9401	4.29464
lib230331_GATCATGCAGACCTGC-1	-33.8681	11.6873
lib230331_GCATGATAGGCTCAAG-1	-30.8439	7.29475
lib230331_GCCAGTGAGACCACGA-1	-34.065	12.433
lib230331_GGAATCTGTCATCTAG-1	-9.6651	9.01978
lib230331_GGAGGTACACATCCCT-1	-9.10527	8.65689
lib230331_GGCACGTAGGGCGAAG-1	-11.6772	7.27542
lib230331_GGGCTCATCGGCTCTT-1	-8.03163	9.3234
lib230331_GTAATCGCACAATTCG-1	-9.7396	8.27038
lib230331_GTCATCCCAGAACTAA-1	-11.0871	7.72825
lib230331_GTCCTCAGTAGTTCCA-1	-24.2579	26.6789
lib230331_GTTATGGCAAGATGGC-1	-11.3597	7.51808
lib230331_TACTTACTCTACCTTA-1	-7.55967	14.046
lib230331_TAGCACAAGAGGTTTA-1	-12.2561	6.86181
lib230331_TCCAGAAGTATACGGG-1	-9.12873	-1.16514
lib230331_TCCCAGTTCTGGTTGA-1	-10.1793	8.62769
lib230331_TCCGATCGTCTAGGTT-1	-8.61515	10.8245
lib230331_TCGCACTTCATTACGG-1	-9.92533	8.91512
lib230331_TCGGGCACATAGATGA-1	-9.78741	-0.0413189
lib230331_TCTAACTAGTATCTGC-1	-22.3649	30.2738
lib230331_TCTACATAGAATAACC-1	-8.99974	9.96901
lib230331_TGAGCATAGATGTTCC-1	-9.04521	10.2312
lib230331_TGAGGGACAAGGTCTT-1	-7.93573	11.0721
lib230331_TGCTTCGTCTCGTGAA-1	-9.06245	9.84853
lib230331_TTCCTTCTCTTACTGT-1	-12.9552	6.42301
lib2_AACCTTTAGCGACTGA-1	-0.223606	8.09072
lib2_AACCTTTTCCGCAAAT-1	20.7453	1.56651
lib2_AACGAAATCATCACTT-1	-43.5287	-4.34304
lib2_AACTTCTCAATGCAGG-1	5.76887	-4.52886
lib2_AAGAACACAACGTATC-1	7.4411	5.77215
lib2_AAGACAACATGATGCT-1	4.23248	-26.1724
lib2_AAGACTCCACCGGTCA-1	20.7488	-1.85337
lib2_AAGCCATAGGAGCTGT-1	26.3531	-1.76457
lib2_AAGTCGTTCTTGGAAC-1	-11.5964	35.7601
lib2_AATCACGTCCTTCTAA-1	11.5385	-5.43692
lib2_AATCGACTCGTCAGAT-1	17.325	-18.0815
lib2_AATTCCTCAGTATACC-1	11.9139	-26.7685
lib2_ACAAAGATCATTCGGA-1	-40.196	-4.15672
lib2_ACAAGCTTCTCTGCCA-1	-14.9671	36.2477
lib2_ACAGAAAAGCCTCTGG-1	-0.339206	7.62269
lib2_ACATTTCCACGCACCA-1	-30.4628	10.4929
lib2_ACCCTTGTCGCTCATC-1	-47.6586	-2.31587
lib2_ACCGTTCGTTTCACAG-1	16.0269	-25.9099
lib2_ACCTACCGTCTGTCCT-1	12.7021	-8.05692
lib2_ACGCACGCATTACGGT-1	15.0003	-6.62588
lib2_ACGCACGGTACGACAG-1	9.96986	-5.43957
lib2_ACGTAGTAGGAGAGTA-1	23.7737	-0.978773
lib2_ACGTAGTGTGAGACCA-1	9.59706	-26.04
lib2_ACGTCCTTCGGCTTGG-1	8.4493	-25.7436
lib2_ACTATCTTCTGTCGTC-1	-12.7205	35.0538
lib2_ACTATTCTCAGACTGT-1	-31.2986	10.385
lib2_ACTGTCCTCTCAAAGC-1	-30.387	10.4837
lib2_ACTTATCTCTTAGCCC-1	-14.1075	36.0067
lib2_ACTTTGTGTATCGAAA-1	19.589	-6.94418
lib2_AGAAGTAAGCGCTGAA-1	22.3935	1.6103
lib2_AGACACTAGGTGCTAG-1	19.2922	-7.6172
lib2_AGACACTTCAGGACGA-1	18.3528	-18.6508
lib2_AGACACTTCTTCACGC-1	14.7939	1.2377
lib2_AGAGAATGTCTCACGG-1	14.1213	-10.7992
lib2_AGCATCATCACAAGAA-1	6.17573	5.01649
lib2_AGCCAATTCCTTATCA-1	3.95634	8.99239
lib2_AGCCACGCATGTTCAG-1	17.8736	-9.87452
lib2_AGCGATTTCCAAGGGA-1	28.1468	-4.27355
lib2_AGCGTATTCTGGAAGG-1	1.43536	19.1429
lib2_AGCTTCCCAGGTATGG-1	26.6768	-2.88784
lib2_AGCTTCCGTGTTTACG-1	-11.8504	35.7671
lib2_AGGATCTTCTTCTCAA-1	-10.4681	29.8876
lib2_AGGCTGCTCTCTCAAT-1	-18.2712	-2.46944
lib2_AGGGTTTGTGGCGTAA-1	26.8368	-1.50019
lib2_AGGTCTATCCTTATGT-1	-22.8215	-2.29165
lib2_AGGTTACCAGAGATGC-1	24.7032	-14.9065
lib2_AGGTTACTCTATCGCC-1	-47.5729	-2.38989
lib2_AGGTTGTTCCTATTTG-1	-43.2237	-6.10757
lib2_AGTGCCGAGCGATTCT-1	17.8637	5.83622
lib2_AGTGTTGAGTCAGAGC-1	17.659	-4.53529
lib2_ATACTTCGTGTAAATG-1	27.9597	-8.29204
lib2_ATAGGCTAGACCATGG-1	13.5398	-5.62739
lib2_ATCACAGCAGAACTCT-1	-0.256717	7.25021
lib2_ATCAGGTAGGTTCACT-1	-18.3326	-2.53362
lib2_ATCCACCGTTTCACAG-1	-18.1038	-2.30257
lib2_ATCCGTCAGCCTGTGC-1	7.55279	-30.6044
lib2_ATCCGTCGTCTACTGA-1	20.4726	4.72073
lib2_ATCGATGTCCTCACGT-1	26.8457	-2.9175
lib2_ATGACCAGTCGTGGTC-1	21.8808	-18.5076
lib2_ATGGAGGCACGTATAC-1	22.6841	-7.15336
lib2_ATTACCTTCGAAGGAC-1	-45.4183	-4.32715
lib2_ATTACTCAGACGACTG-1	4.98017	7.13302
lib2_ATTCACTCATCCTTGC-1	-14.145	36.111
lib2_ATTCAGGCACGAGAAC-1	2.53252	24.9483
lib2_ATTCCATGTTAATCGC-1	17.868	-3.63561
lib2_ATTCTTGAGGATTTGA-1	-38.3033	-5.47563
lib2_CAACAGTGTTCACGAT-1	-17.6076	-1.83272
lib2_CAACCTCCAGCTGAGA-1	-37.2755	-7.36634
lib2_CAACCTCCATCGATAC-1	-41.9701	-3.53342
lib2_CAACGATGTTCACGAT-1	-42.359	-2.34209
lib2_CAAGCTACATCGTTCC-1	0.993557	7.64925
lib2_CAATGACCAAGTGACG-1	-14.3853	36.1968
lib2_CAATTTCTCGAGAAAT-1	21.3309	-7.30949
lib2_CACACAATCGAAGCAG-1	16.4317	1.37524
lib2_CACAGATGTGCAATGG-1	7.30706	10.1449
lib2_CACGAATTCCGAGTGC-1	12.5939	1.04869
lib2_CACGGGTTCCGTGTGG-1	20.2819	-5.04151
lib2_CACGTGGAGCATTTGC-1	10.9078	-23.5726
lib2_CACTAAGCACCTATCC-1	21.3257	-13.2026
lib2_CACTGAAGTGGTCTCG-1	12.1232	-4.36534
lib2_CACTGGGTCCATGCAA-1	49.3389	-1.42922
lib2_CACTGGGTCGAGGCAA-1	26.1301	1.92576
lib2_CACTGTCCAATCACGT-1	-31.6905	9.80448
lib2_CACTGTCTCCATGCAA-1	-47.6762	-2.34812
lib2_CAGATCAAGGAGTATT-1	18.5874	-1.16036
lib2_CAGCAATGTTGTCTAG-1	-47.6056	-2.42967
lib2_CAGCCAGGTTGCTTGA-1	-45.0642	-4.53249
lib2_CAGCCAGTCTCTCGAC-1	14.7871	-3.2217
lib2_CAGTTAGTCTTGCGCT-1	-31.7872	10.1662
lib2_CATAAGCCACGTTCGG-1	26.2653	1.07902
lib2_CATACCCAGTTGGGAC-1	22.8566	-6.40897
lib2_CATCCGTAGAGGGTGG-1	-11.8878	35.714
lib2_CATCGCTCAATCGCGC-1	5.15667	8.42715
lib2_CATCGGGTCTTAGCTT-1	19.2622	2.36074
lib2_CATCGTCTCCGTGTAA-1	-12.2467	34.0738
lib2_CATGAGTCATTGGCAT-1	2.71343	-26.0359
lib2_CATGCTCTCGCTGACG-1	2.05779	26.2142
lib2_CATGGATTCCATTTGT-1	16.2523	-7.42619
lib2_CATTCATGTTAGGCTT-1	4.29735	-28.8664
lib2_CATTCCGTCTACGCGG-1	18.5968	-22.0071
lib2_CATTGTTGTACGATTC-1	-17.7107	-1.93661
lib2_CATTGTTGTCGAACGA-1	-42.5224	-3.56907
lib2_CCACGTTAGATCCTAC-1	17.8641	-3.44332
lib2_CCATAAGCATCAGCAT-1	-0.0626075	8.13719
lib2_CCATAAGCATGTGCTA-1	23.8469	-11.0667
lib2_CCATCACCAACAAGTA-1	-14.147	36.0882
lib2_CCCATTGAGAGTTGTA-1	27.0055	-3.26004
lib2_CCCTCAATCGATCCCT-1	15.0745	-21.4473
lib2_CCGATGGTCTGGAAGG-1	14.811	-29.5522
lib2_CCGGGTATCACTTGGA-1	26.2419	-3.18129
lib2_CCGGTGACAGTTGTCA-1	5.98671	8.22854
lib2_CCTAACCGTTGCATCA-1	19.2341	0.977637
lib2_CCTAACCTCCGCTAGG-1	5.90167	6.3801
lib2_CCTAAGAAGCCGTAAG-1	22.322	-2.27774
lib2_CCTAAGAGTTATTCCT-1	6.25954	9.90004
lib2_CCTCAACGTGCTGCAC-1	-18.397	-2.59516
lib2_CCTCAGTCAAGCTCTA-1	13.8768	-23.6319
lib2_CCTCAGTGTGGCTTGC-1	24.1075	1.64911
lib2_CCTCAGTTCTCGAGTA-1	-41.2984	-3.2022
lib2_CCTCATGTCGCATGAT-1	27.1651	-1.64131
lib2_CCTGCATGTGGTATGG-1	-38.4338	-5.42414
lib2_CCTGCATTCTACTATC-1	12.1882	-18.1944
lib2_CCTGTTGAGCGAATGC-1	-40.7505	-5.13742
lib2_CCTTGTGGTGGACTGA-1	13.341	-2.46928
lib2_CGAAGTTTCCATCTCG-1	8.18911	10.9396
lib2_CGATCGGCAGAAATTG-1	9.9291	-0.935903
lib2_CGATCGGGTTTCGACA-1	7.18576	-27.3765
lib2_CGATGGCCACTACTTT-1	18.3466	-0.657429
lib2_CGGCAGTCAAACTAAG-1	-12.0412	35.9702
lib2_CGGCAGTGTATCTTCT-1	-31.6402	11.2363
lib2_CGGGCATAGTACGTCT-1	0.667753	26.2803
lib2_CGTGAATGTCACGCTG-1	6.31149	-1.72919
lib2_CGTGAATTCGTTACCC-1	9.37694	-23.5479
lib2_CGTTAGAAGTATGGCG-1	8.20612	-2.91853
lib2_CTACAGACACACCTTC-1	-0.513134	8.43062
lib2_CTACTATAGCGGTAAC-1	17.6815	1.55747
lib2_CTAGGTAAGAATTGCA-1	6.07633	-29.1112
lib2_CTATCTAGTCGCATCG-1	-14.358	36.1245
lib2_CTATCTATCAGAGTGG-1	11.5108	-0.649025
lib2_CTCAATTCAAGCACCC-1	-38.4197	-5.37478
lib2_CTCAATTGTATCAAGA-1	13.8881	-25.4473
lib2_CTCCAACAGCGGGTAT-1	20.2273	-0.620694
lib2_CTCCACAAGGTCACTT-1	-44.8643	-2.74779
lib2_CTCCATGTCAGACATC-1	5.78235	-5.55838
lib2_CTCCCAATCGGTCGAC-1	17.8309	-1.73938
lib2_CTCCCAATCTCAGAAC-1	-18.0468	-2.26078
lib2_CTCTCAGCAGGGAATC-1	22.3064	-4.75405
lib2_CTGAGCGCAAATAGCA-1	-14.6105	36.143
lib2_CTGAGGCAGACTCATC-1	14.8202	-13.9791
lib2_CTGAGGCCAAGCAGGT-1	14.7123	1.34674
lib2_CTGATCCAGCAACCAG-1	19.9348	-1.61015
lib2_CTGCATCCACATTGTG-1	19.2224	-7.25575
lib2_CTGCCATCAATCTCGA-1	12.1654	-24.3526
lib2_CTGGACGAGGATGCGT-1	13.8723	0.597994
lib2_CTGGACGGTACTAAGA-1	-38.2943	-8.19005
lib2_CTGTACCGTCTAGGCC-1	-12.1661	35.5046
lib2_CTGTGGGGTCTTCATT-1	21.4067	-17.6541
lib2_CTTCAATGTGATTCAC-1	20.4659	-0.690495
lib2_CTTCGGTAGTCACTAC-1	25.3892	-0.337815
lib2_CTTCTCTGTGGCAACA-1	-31.4211	10.3759
lib2_GAACACTGTAGGAGGG-1	2.68154	25.3133
lib2_GAACTGTCAATCACGT-1	24.1427	-9.00799
lib2_GAACTGTGTAATCAAG-1	-11.4373	35.5761
lib2_GACACGCAGACGGTTG-1	4.6737	-5.21785
lib2_GACATCACAGCACCCA-1	11.0547	6.7197
lib2_GACCTTCCAAGCGGAT-1	-11.7536	35.4551
lib2_GACTTCCTCCGGGACT-1	21.3815	-3.85525
lib2_GAGAAATGTCATAGTC-1	-31.9757	10.8074
lib2_GAGATGGCAATTCTTC-1	-14.0313	36.1191
lib2_GAGCTGCAGCGAGGAG-1	16.1129	-1.26775
lib2_GAGCTGCTCAGGAACG-1	-31.8691	8.50072
lib2_GAGGCAATCCTTCAGC-1	19.2215	-5.34953
lib2_GAGTCATTCGAGATGG-1	24.8459	2.04612
lib2_GAGTTTGCAGGACAGT-1	14.8174	-1.23903
lib2_GATCATGTCCGCACGA-1	-46.876	-3.38479
lib2_GATCGTAAGCTGTTAC-1	-13.8192	35.8279
lib2_GATGATCCACCCATAA-1	10.5577	12.1868
lib2_GATGTTGCAGTTACCA-1	16.3822	-4.55735
lib2_GCAACATAGGTCTGGA-1	12.3582	-24.136
lib2_GCAACCGCAGCTGAGA-1	-39.2391	-5.61841
lib2_GCACGTGCATGGGATG-1	17.9131	1.96033
lib2_GCACGTGGTGTCATTG-1	15.8608	-15.0168
lib2_GCAGCTGTCTTCCTAA-1	-14.1509	36.0882
lib2_GCATGATTCTGAGAGG-1	18.2615	-23.9682
lib2_GCCAGGTAGTGTTGTC-1	2.48273	25.0001
lib2_GCCAGGTCAGTAGGAC-1	18.717	-1.37075
lib2_GCCTGTTTCGGAATGG-1	26.1414	-3.05165
lib2_GCTCAAACACAGAGAC-1	-11.7408	35.7229
lib2_GCTTGGGTCAGCAATC-1	-12.9656	35.2496
lib2_GGACGTCTCAGCGCGT-1	-42.7862	-6.56203
lib2_GGAGAACGTAGGTTTC-1	16.0219	-12.4568
lib2_GGAGATGCACAAGCAG-1	23.24	-15.1252
lib2_GGAGGATGTAGGTAGC-1	2.54408	24.8051
lib2_GGCACGTGTTTGACAC-1	15.1568	-1.5363
lib2_GGCAGTCGTAGATCCT-1	7.66648	9.50301
lib2_GGCTTGGTCAGGAGAC-1	9.40082	-14.713
lib2_GGGATCCCATCGAACT-1	-42.1595	-6.53674
lib2_GGGATGAGTTTGGGAG-1	19.3523	-7.23118
lib2_GGGCCATTCATAGCAC-1	-30.8538	7.4955
lib2_GGGCGTTAGACGACGT-1	10.6316	-4.09399
lib2_GGGCTACAGCCATATC-1	18.9608	-20.3288
lib2_GGGTATTCACACCTTC-1	-13.6045	35.7775
lib2_GGGTTATAGAGCAGAA-1	2.1105	26.0036
lib2_GGTAACTAGATCCTAC-1	-18.0433	-2.25986
lib2_GGTAATCAGTAAATGC-1	-47.2457	-2.4503
lib2_GGTAGAGCATAGTCAC-1	-11.5422	35.7708
lib2_GGTGATTTCCGAAGGA-1	21.2144	-6.32565
lib2_GTACAGTGTTGCGGCT-1	12.0384	-4.83428
lib2_GTACAGTTCCACGTGG-1	24.6064	-12.4107
lib2_GTAGATCAGGTGGGTT-1	18.5345	1.13155
lib2_GTAGATCCAACTCCAA-1	6.02138	-28.9585
lib2_GTAGATCTCTAGAGCT-1	20.6907	-0.963763
lib2_GTCAAGTAGGCGAACT-1	-43.7567	-4.20989
lib2_GTCACTCAGCCATTGT-1	-12.4791	35.2909
lib2_GTCACTCCACCCTCTA-1	17.8149	2.84115
lib2_GTCCACTCATCCCACT-1	24.2583	-1.48853
lib2_GTCCCATCAAGCCCAC-1	-38.3309	-5.81754
lib2_GTCGTTCAGAACGTGC-1	-11.8201	35.6585
lib2_GTGACGCGTCTCCTGT-1	19.1683	-4.89788
lib2_GTGAGGATCGCACTCT-1	20.4311	-7.41172
lib2_GTGCGTGGTTAATCGC-1	-37.3922	-7.49378
lib2_GTGCTTCAGTTCTACG-1	4.80078	-5.29454
lib2_GTGCTTCGTTCCAAAC-1	2.3533	24.3084
lib2_GTGGAGATCCGATCTC-1	19.6899	-4.07271
lib2_GTGGGAAGTTCGGGTC-1	-14.5576	36.1386
lib2_GTGTTAGCACTGGCCA-1	18.8632	0.0428468
lib2_GTTAGACGTAGGCTGA-1	7.01263	-27.9988
lib2_GTTCTATCATCTCGTC-1	-47.3273	-2.68263
lib2_GTTGCGGGTTCCGTTC-1	-31.4062	10.618
lib2_GTTGTAGTCTACACAG-1	13.8351	-0.944997
lib2_GTTTACTAGTTGGCTT-1	26.3665	-2.42519
lib2_TAACCAGTCTCAACGA-1	21.4806	-10.2744
lib2_TAAGCACGTAGGCAAC-1	14.0767	-18.2872
lib2_TAAGCACGTGTCATCA-1	19.9454	-7.40558
lib2_TAATCTCCAAACACCT-1	8.6493	11.0305
lib2_TACATTCCAGCGAGTA-1	17.295	-0.812993
lib2_TACCCGTTCCAACTGA-1	14.1417	-23.7668
lib2_TACTTACCACGCTGTG-1	21.6977	-7.93826
lib2_TAGATCGGTACTCGAT-1	24.653	-1.3939
lib2_TATACCTCATTGCCTC-1	22.3705	1.4283
lib2_TATCTTGTCCATTGCC-1	18.3652	-26.1986
lib2_TATTCCAAGAGTGACC-1	21.0832	-2.30905
[truncated: 1,160 more rows]

## Sheet: PCA
Cell	PC_1	PC_2	PC_3	PC_4	PC_5	PC_6	PC_7	PC_8	PC_9	PC_10	PC_11	PC_12	PC_13	PC_14	PC_15	PC_16	PC_17	PC_18	PC_19	PC_20	PC_21	PC_22	PC_23	PC_24	PC_25	PC_26	PC_27	PC_28	PC_29	PC_30	PC_31	PC_32	PC_33	PC_34	PC_35	PC_36	PC_37	PC_38	PC_39	PC_40	PC_41	PC_42	PC_43	PC_44	PC_45	PC_46	PC_47	PC_48	PC_49
lib230524_AAACCCAGTTCTTGCC-1	-3.35963	-3.2346	-0.559487	-0.43959	0.437342	-1.0102	0.36811	-0.440654	1.48664	-1.15402	-1.31484	-2.21644	0.731436	-0.435505	-0.282796	0.0357828	-0.941298	0.676354	-0.359967	-1.82245	-2.21554	-0.545793	0.621147	0.571195	0.164777	-0.99547	1.08938	0.830846	0.604099	-1.02296	-1.59851	0.722105	-0.906203	0.357106	-0.902756	0.608513	0.469426	0.526241	-1.20891	0.0746014	-0.800201	0.103513	0.891555	-1.10905	-0.625273	-0.724214	0.393628	-0.00774314	-1.03458
lib230524_AAACGAAAGTAGGGTC-1	5.81011	-3.98661	8.99159	-0.673823	-2.13592	-2.71886	3.60342	-1.52071	0.446409	0.645207	-0.811765	2.01839	3.64197	0.89394	0.958438	-0.0313929	0.370663	0.341891	-2.25908	-0.757664	0.223802	-1.35321	2.83683	-0.696987	-0.0964192	-0.185062	-0.892012	2.74389	2.63249	0.654033	1.33435	-1.36978	0.143939	1.98067	-0.842755	3.64393	-1.16096	0.29173	-1.18421	0.0601692	2.56757	-0.837047	0.348609	-1.00075	1.73219	-0.296042	0.0279918	0.414687	0.322849
lib230524_AAACGAAGTTAATGAG-1	9.55122	-2.57849	7.42279	-1.30832	1.47724	1.80192	1.791	1.58828	0.635876	4.67098	-0.844756	-0.719028	1.47265	1.33512	0.0425521	0.869463	1.64795	-0.0666126	-0.380896	0.279258	0.0796381	-0.118471	0.112804	-0.32361	-0.806532	1.01	2.86506	-0.950536	1.25953	0.537487	1.11524	1.55971	-0.306467	-1.52158	-2.42528	0.67493	1.29123	0.820992	-1.50695	0.103002	0.435446	-0.408096	-1.00069	-0.0859157	0.926413	-0.575304	-0.267585	0.587111	-1.79689
lib230524_AAACGAATCCATCTCG-1	3.7501	-3.2191	4.85435	0.998283	-1.12183	-0.458936	2.24072	-2.78952	-0.239295	-0.779497	-1.09102	-0.307155	1.69328	-0.940125	-1.17558	0.0216137	0.796761	-0.384384	0.388347	1.47538	-1.07442	0.159548	-1.98268	0.264183	-0.569997	-1.33472	0.995629	2.55354	0.447255	1.26181	0.645822	0.597853	2.08178	0.0671497	0.350026	2.24785	1.38009	1.18477	0.501068	-0.758395	1.43978	0.0612561	1.56539	0.60995	-1.83901	-1.55519	-1.14612	-0.610971	-1.35735
lib230524_AAACGAATCTTGATTC-1	0.0914304	-4.58643	6.29407	0.986683	-2.47141	-2.01866	0.837514	-1.80337	0.165322	-0.79555	-0.85553	-0.37621	1.13782	0.37368	-0.916834	-0.0705099	-0.988219	0.946396	-0.703618	0.197175	0.457531	0.588779	0.209872	-0.0153936	-0.503675	1.39928	1.4455	1.42673	1.25809	-0.371972	1.4734	-0.12834	-1.54473	0.219318	-0.728708	0.896562	0.840281	0.792829	0.280242	0.638713	1.25283	-0.934688	-1.63111	0.664267	0.371991	-0.861188	1.14867	0.120707	0.174278
lib230524_AAAGAACAGCGTACAG-1	14.3454	4.86215	2.43981	2.27097	0.0369251	-3.86687	-2.49143	0.071059	0.218817	-0.130042	2.74477	-1.64207	2.66274	-0.912508	-1.58571	-1.01322	1.23258	-2.59365	-2.50452	1.41988	-1.61964	2.23726	-1.51078	-0.0426117	-4.7933	0.351645	3.10181	1.59801	0.670911	2.72541	-2.25824	-1.66069	1.1109	-1.06237	1.46637	-1.42134	-1.20701	0.883518	-1.14632	-0.0200538	-2.45327	-2.62007	1.78791	-0.85585	-3.29658	-0.902391	1.19521	1.83613	-2.98382
lib230524_AAAGGGCCACAGCTTA-1	3.38706	-1.98919	0.986198	0.350624	1.68183	1.33148	2.96039	-0.421044	0.594291	-0.737034	-2.12009	-2.36721	2.4549	-1.14268	-0.671905	-1.52295	1.26594	-1.26608	0.390583	1.10367	1.03226	-0.224812	1.10441	-1.60171	-1.02516	1.51567	0.250104	1.40318	-1.32691	2.17455	-1.31726	-2.16028	1.28891	-0.280148	0.511242	1.33173	-0.845908	0.517221	-0.731125	-1.82477	0.396646	0.917085	-1.33696	1.04424	-1.10679	0.714219	-1.47408	0.431782	0.809868
lib230524_AAAGGGCCACCTGCAG-1	-2.7718	-3.51064	0.988457	2.61397	1.52514	0.684349	2.53428	-1.97605	1.81598	-0.232961	-2.56398	-1.35108	1.31424	0.187178	-0.299014	-2.58004	-1.08246	0.931309	-0.252495	-0.373227	-0.033755	0.00945022	-1.2079	1.84076	1.0729	-0.81685	-0.172567	0.0208233	2.46758	1.14112	-1.6451	-0.349227	1.52539	0.948754	-0.593027	0.189965	1.1878	0.410631	-0.441464	0.0731138	0.218637	3.34984	0.334605	-2.12351	0.926029	0.0839567	-2.88707	1.28475	2.48767
lib230524_AAAGGGCCAGCTGAAG-1	1.53974	-2.40354	2.31868	0.949136	0.530451	1.16795	2.78741	0.762323	0.0459133	0.302791	-1.97396	-2.56347	-0.00309774	-2.27065	-1.34142	-1.18561	0.505747	0.57788	2.85372	-1.61365	-1.1364	-0.252981	2.77882	-1.69313	-1.08567	-0.999669	-1.88583	-0.889753	-0.766865	-1.08808	0.818104	-0.822519	1.95819	-0.119368	0.0154421	-0.517637	-2.04939	-2.17431	-1.30996	-0.717033	-0.100099	3.32576	0.221749	-1.31279	-0.700386	-0.495254	-0.610014	-0.182429	2.03713
lib230524_AAAGGGCCAGTAGTTC-1	1.47652	-1.29326	1.9332	-1.16925	-0.725062	0.196936	1.8597	-2.75652	-0.962614	0.265649	-2.91143	-3.96546	3.5895	2.38774	0.867516	-4.71011	-1.2769	-0.364452	-0.171417	0.282317	-0.284074	-0.578693	0.617049	0.0730859	-0.569552	-0.492408	0.253415	-0.557136	-2.98141	-0.100207	-2.45643	-0.618483	1.66625	-0.169395	0.118665	0.292189	-1.50216	0.04859	-2.62822	-0.262405	-0.94322	-0.182698	2.12853	0.248735	-0.310776	-2.119	-0.543912	1.67812	0.43539
lib230524_AAAGGGCGTGAGATCG-1	17.6733	4.32416	11.8937	3.45381	-3.00787	-9.84608	4.29581	-0.116185	1.32449	1.38895	1.54687	3.71198	-3.26545	4.25276	0.596649	6.26651	2.11272	-0.199689	-2.28124	-0.494066	-0.209852	-1.24733	-0.787708	0.814253	3.1981	2.47951	3.52944	0.969693	-0.778683	0.331941	0.91933	-1.12259	-0.731981	-0.163051	-2.1008	2.84069	2.73243	0.636877	-4.02364	-4.4217	6.11018	-1.93596	1.16807	0.570266	0.305858	-1.85202	-0.162483	-3.35002	1.62022
lib230524_AAAGGGCGTTAACCTG-1	1.63205	-2.19807	3.55734	-0.627834	-2.04097	-1.82123	3.30317	1.11077	-1.52546	0.0231128	1.04798	-0.860941	-0.667914	0.0122717	-0.731152	-0.891985	-0.522812	1.1478	-0.406898	-1.38236	-1.57136	0.733909	-0.878656	0.60673	-1.47217	-0.47473	0.435641	1.76232	-1.12146	0.0113368	2.06552	-3.55659	0.0606303	0.993507	-1.45682	0.729259	-2.56819	0.388256	-2.67332	-0.953429	0.17474	-1.48469	-0.955967	1.88122	-2.80543	0.0987278	1.38677	-1.46628	-1.21318
lib230524_AAAGTCCGTCTGATCA-1	-5.40813	-3.68275	-0.258658	0.807891	-0.313405	-1.15293	0.956963	-1.35133	0.723374	-1.0059	-2.69547	-0.217427	0.606633	-0.592428	0.364476	-1.47274	-0.0221819	0.888263	-0.209565	-0.898724	0.656709	0.931967	0.467976	-1.73397	-0.592684	0.0165233	-0.667806	1.10257	0.483882	-0.164648	-0.18676	0.336432	-0.131792	-0.0787892	-1.49043	0.172989	-0.24157	-0.389383	-1.00294	0.229948	-0.0324608	-0.543831	0.393265	-0.764724	0.853702	-0.0585095	-1.12614	-0.564538	-0.799387
lib230524_AACAAGACAGGTTACT-1	12.9593	-0.96541	8.39807	-0.643824	-1.23604	0.206246	-1.06986	1.35082	-1.36619	0.444248	-1.14544	0.43798	2.85836	-0.697674	-0.474993	1.0996	0.817929	-1.23001	-1.11477	1.4166	0.378526	-3.05175	-2.55836	-1.14668	1.12216	-0.70132	1.02961	0.756605	-0.262398	0.814656	0.756353	-1.48573	0.754529	-1.7176	-1.07884	0.855378	0.355038	-0.605434	1.00172	0.0510378	0.695777	-0.163241	-0.512174	0.213855	0.664501	0.340335	0.94041	0.168193	-0.271332
lib230524_AACACACCAGACCGCT-1	1.90805	-2.68495	2.34468	1.82557	1.45202	3.84389	3.4284	-0.234002	-0.0405214	0.276151	0.462042	-1.18634	2.50566	-1.50847	-1.54084	0.508934	-0.519617	0.372171	1.6613	-0.0190151	0.70139	-0.57497	-1.24305	-1.12565	1.74374	-1.11516	-0.603006	0.153895	1.70695	-0.161427	-0.444383	-0.318821	-0.285386	0.960045	0.117588	0.526801	-0.23584	1.85118	0.629667	0.18774	-1.43298	0.575875	0.860717	-1.5884	-1.45218	1.44328	1.98361	-0.57462	0.683437
lib230524_AACCAACCAGGTATGG-1	3.93919	-3.81224	4.57277	-1.41869	0.654497	1.87588	1.81649	-1.85133	-1.48852	1.18983	-2.71644	-0.491003	1.14319	-1.38995	-0.335044	-0.147164	5.12831	0.111659	-0.829799	2.23435	-0.763717	-1.33197	0.874853	3.13964	-2.72632	0.453231	1.39354	0.431345	-0.527996	0.053957	2.11309	-0.431053	-2.16608	1.51356	1.08162	4.39228	0.516896	0.431702	0.669782	0.922483	1.62491	0.712485	1.92211	0.00111342	-0.866619	-1.64494	1.03878	-0.459051	-0.181015
lib230524_AACCAACGTTGTGGCC-1	-0.900177	-2.92405	3.87033	0.901616	-0.201806	-0.0864461	2.48761	-2.22639	0.0305362	-1.09879	-0.940915	-0.0818844	1.75083	0.0535186	-0.683185	-1.5612	-0.287025	-0.416771	0.478842	-2.00591	0.0551527	1.0237	1.44447	-1.85337	0.0699543	0.492538	-0.48349	0.118282	1.3219	0.465103	-0.993624	0.976291	-0.936231	0.77799	2.07168	0.258393	-1.52409	0.745178	1.27031	0.00732013	2.27733	0.641981	-1.45018	-1.69287	2.43357	1.09282	0.850883	2.35713	1.41674
lib230524_AACCAACTCCTACTGC-1	10.2754	-1.43759	11.9171	1.68263	-3.05778	-5.41244	0.136345	-0.132429	0.730015	1.57471	0.439318	1.61707	0.831951	4.07183	1.71892	0.817539	0.60704	-0.010852	-3.25542	0.702864	0.291163	-1.63883	0.934097	-0.635021	0.723183	1.91704	0.559495	2.06411	-2.42064	1.46026	-2.71356	-0.201429	-2.96072	0.400618	-0.863249	-0.747544	-0.965624	-0.0957427	-1.86462	-2.96306	-0.340323	-1.16021	-0.468075	-2.01045	0.545257	-0.561156	-1.28131	-1.32275	-1.92478
lib230524_AACCATGCAGGGTCTC-1	1.42536	-4.26923	6.82331	0.789368	-1.56077	-5.70549	1.4774	-2.83349	0.566504	-0.289766	1.60907	3.14788	2.1601	2.51296	-0.0281971	-0.5692	-0.826111	0.122716	-2.01649	-0.863822	1.54465	0.392118	0.730618	-1.27629	0.0924747	-1.63353	0.08557	0.247614	1.72427	2.40565	1.29679	-0.960673	-0.136693	1.62725	0.49812	0.812209	-1.6101	0.987593	0.956145	-0.846147	0.37475	-0.712787	-1.81963	0.700803	0.0168854	0.513529	1.49046	-0.430173	0.584957
lib230524_AACCCAAGTAGATGTA-1	2.1981	-2.9628	2.66669	1.92538	1.04932	1.37227	0.981465	-1.72552	0.5269	-1.55969	-0.867883	-1.46888	2.2266	-1.7721	-1.50409	-0.398513	-1.25839	-0.362454	2.90437	0.60435	-1.18242	-0.0139694	-0.211649	-1.46551	0.461229	-2.14209	-2.54339	1.00265	1.20385	-0.407645	-0.329468	-2.10456	2.72376	1.86846	2.08178	0.209088	-2.95495	-0.342484	-0.0152726	1.81897	-1.45517	0.392588	2.25101	-0.037066	0.700345	2.11297	1.22325	-1.65238	-0.930713
lib230524_AACCCAATCTACACAG-1	0.666904	-4.23816	5.92931	-0.093216	-1.84092	-4.11645	0.695862	-1.81588	0.324257	-0.769332	0.9496	1.92591	1.30727	1.35389	0.562313	-0.480701	-1.09247	0.640768	-0.794167	-0.216494	1.14745	0.266777	0.883381	-0.920538	-0.962494	-0.712001	0.333141	1.43646	1.00706	0.13946	0.685299	-1.12463	0.313741	0.906553	0.569612	1.07466	-1.33068	1.02448	-2.08339	0.860386	0.169229	0.0282019	-0.941083	-0.0202064	-1.77052	-0.263237	0.226206	0.835196	0.46232
lib230524_AACCTTTAGAGTCAGC-1	3.57179	0.301768	2.35562	2.33434	0.522532	-3.7389	-0.461406	-3.07644	0.0595658	0.0276532	-2.07989	-1.66529	0.670104	0.551276	1.8954	-1.40729	-1.65794	-1.42499	2.32189	2.74189	-0.114584	3.87962	-1.37634	-0.818181	-1.14481	-1.00558	1.06404	4.71266	3.75778	0.157414	-2.78084	-0.526083	2.71728	1.233	2.13852	-0.169577	-0.788152	0.853563	-0.111778	6.7925	-0.95901	2.19037	3.45675	-1.01896	0.381105	0.639467	1.04001	-1.55443	-3.19535
lib230524_AACGAAAAGTGAGTTA-1	-1.66104	-3.47079	0.124966	-1.00503	1.3866	-1.0474	1.44184	-1.77856	1.19105	0.575708	-4.36315	-2.00285	0.228066	-1.41069	0.776614	-1.65283	1.91883	-0.111444	-0.809751	-0.641351	0.563868	-0.368757	1.40017	-0.5842	1.7107	-1.559	-1.35625	1.37828	-1.01787	1.40349	-0.0611609	-0.160472	2.26415	0.501193	-0.580575	-0.208872	-1.9952	-0.386165	2.36592	1.04607	0.3015	0.00810475	-0.162604	0.0751946	-1.15719	-0.713008	-2.99798	1.03453	0.902238
lib230524_AACGTCAGTCGATGCC-1	-4.36171	-4.74451	2.16288	0.666804	-1.68769	-2.85142	0.960681	-1.92378	0.495385	-1.18086	-0.826641	-0.445647	1.13246	0.466249	0.132214	-2.00356	-1.13059	1.04678	-1.22115	-0.895534	0.0521958	-0.658869	0.0559143	-0.937341	0.0559302	-1.12682	-0.260481	-1.21361	-0.0130074	-0.481452	-0.412346	-0.458603	0.274207	1.10818	0.135145	-0.00171725	-1.36919	-0.243753	-0.606525	-0.296622	-0.0109624	-0.43578	-0.0496349	-0.673145	-0.0781975	0.348009	-0.182485	0.45259	0.144848
lib230524_AACTTCTAGCCGTCGT-1	-1.74027	-3.73275	0.760809	-0.401023	-1.12489	1.14218	-0.183669	-2.29539	0.224489	-0.682221	-1.56363	-1.86752	1.33399	-1.4855	-0.475394	-1.41675	0.56716	1.14039	0.0513919	1.30227	2.23402	0.238512	0.36973	-0.523683	-0.898428	-0.242304	-0.798144	-0.362047	0.184984	1.71267	1.69607	-0.921182	1.75421	-1.43727	-0.736539	1.44253	0.0192709	-1.14028	-0.792962	0.0636555	0.379885	0.355783	-1.06277	1.29123	0.675349	-1.20564	-0.86786	0.00139641	-0.377179
lib230524_AACTTCTTCACCTCGT-1	-2.53453	-3.26751	0.799718	0.963792	-2.07747	0.509638	-0.0438434	-2.70416	0.512078	-2.19606	0.659819	-0.817323	1.67959	-0.357407	-0.274701	-0.393183	0.0954092	1.14635	-0.885431	-0.546239	-0.0309976	-0.557466	0.172728	-0.10511	-2.02972	-0.326646	0.903926	1.60542	-0.750724	0.247721	0.269688	-0.759899	1.02931	0.486165	0.38549	0.828444	0.740605	-0.11436	-2.01118	0.147472	0.972773	-0.809193	0.19925	0.970452	-1.12564	0.275685	-1.62453	0.831824	3.81976
lib230524_AAGACAATCCTCCACA-1	-3.87159	-4.06128	1.86757	1.23439	-1.97261	-0.731868	1.80535	-1.9838	0.951188	-1.14371	-1.07634	-1.3561	0.421238	-0.67044	-0.861219	-0.210318	-0.724733	0.823795	0.293392	1.35383	-0.183975	0.732407	-0.233204	-0.853111	0.463	-2.01939	0.321651	-1.06818	-0.0259651	-0.948913	-0.209273	1.6314	0.000918814	-0.300201	0.460439	0.459659	1.21727	-1.94362	-1.97991	1.60154	0.494911	-0.438191	0.549093	-0.3415	-0.352936	0.23937	-1.18954	-0.984304	0.752565
lib230524_AAGATAGGTTCCTACC-1	7.48837	-1.07174	4.44794	1.60962	0.453873	0.60987	1.23543	-0.374874	-0.869352	1.09293	-1.31009	-0.708345	2.18349	-1.11618	-0.158167	-0.608024	-1.51796	1.25627	0.872334	1.41244	1.1988	0.954244	0.524382	2.86045	0.566283	2.29544	1.4671	3.33035	3.54902	-1.01	2.6014	0.352164	1.23292	-0.0130709	-0.80239	4.65217	0.832707	2.49102	1.66768	0.340092	0.329303	0.71343	-3.27207	-0.518532	-4.14323	-0.0273389	-0.940478	-0.582536	-1.29522
lib230524_AAGCCATTCACCATGA-1	20.3974	5.27466	1.67014	-5.54978	-2.3505	-1.67036	4.07271	0.461463	0.644018	0.552341	1.91121	-3.9384	0.052916	-2.40789	-0.10526	-0.866359	-1.22714	-3.49115	0.968021	3.85611	-5.31206	4.93918	1.89545	4.85941	-5.34504	-1.84457	1.23904	0.860747	-8.06309	2.44806	-7.66348	-3.38902	0.924583	3.47787	0.438238	-1.37168	3.36146	-0.248133	-4.55297	-10.1241	5.15321	-0.335545	2.62485	4.58805	6.55742	-3.50763	-8.65352	-5.81653	2.22552
lib230524_AAGCGTTTCCAACTAG-1	-3.24793	-3.93936	0.742443	0.773616	-1.30773	-0.757268	1.36971	-2.49132	1.84189	-1.38983	-0.946039	0.182433	0.345442	-1.05221	0.180024	0.204828	0.881747	-1.1893	-0.320777	-0.601438	-0.332345	0.0986618	-1.06958	1.46561	0.635795	-1.12658	0.712544	-2.96621	-1.04953	-0.371143	1.16085	0.138453	0.177798	1.08006	1.45854	-0.395032	-0.302024	-0.660784	-0.772405	2.10361	0.96636	0.492983	0.991542	-0.752866	-0.420487	1.57451	-1.93712	-1.40532	1.0717
lib230524_AAGGAATGTACGATCT-1	9.13211	-2.01897	3.53302	-1.22093	1.69955	0.535241	2.92092	2.45087	1.51191	1.90676	0.441843	-0.587363	1.56322	-3.59088	-0.734147	-0.515706	-1.42943	-1.24238	-3.48403	1.22782	1.05618	-1.1298	0.111874	2.8213	-0.745643	-0.265008	-0.316646	2.79584	1.17614	1.81585	1.95433	-3.24473	0.754717	1.19697	-0.387224	2.64165	-2.8138	-0.850628	0.6754	-3.34179	-0.436749	-1.45216	-0.635865	-1.95525	-4.67719	-0.930989	-4.26265	3.21325	-0.50346
lib230524_AAGGTAAAGGGAGAAT-1	-0.218648	-3.15774	0.653658	1.78833	-0.428355	0.550435	2.32025	-1.79955	1.5807	-0.671554	0.237024	-0.00451987	0.663169	-0.319453	-0.361002	-1.11646	-0.583788	1.27426	0.973808	-0.833262	-0.696719	2.2911	0.270178	-0.670224	-0.685882	0.246495	0.488178	-0.0190383	-0.1601	-1.14482	0.259114	-0.662568	-2.13062	-1.06614	0.632853	-0.198895	-0.870361	-0.0664487	-1.96562	0.427796	-0.909255	-1.38812	0.959496	-0.506182	0.85639	0.979115	1.35381	-0.750258	0.448035
lib230524_AAGGTAAGTAACATCC-1	-0.819595	-2.24258	-1.13166	1.08722	0.876245	-0.665544	2.33998	-3.57653	0.863153	0.580339	-1.49819	0.139323	1.83549	-0.779462	-0.513223	-1.75569	-0.351187	0.479836	0.695746	-2.54059	-1.37563	0.948602	0.957022	0.0253596	0.708685	-0.340147	2.02967	-0.140168	0.96988	0.648791	1.65572	-0.348357	-1.34116	1.70339	0.58584	0.474601	-2.16433	0.659069	-1.36683	0.135381	-0.215357	-0.444103	1.42789	0.644492	0.600756	-0.29503	0.733424	-0.313382	-0.609521
lib230524_AAGGTAAGTCTCTCTG-1	-15.4414	21.4754	8.45327	-5.23179	3.40528	1.39408	0.976587	-2.20277	0.57542	1.6953	1.21371	1.37013	1.70042	-5.48253	7.03831	3.03405	-1.06044	1.18573	-0.161677	-0.775349	1.48202	2.08493	0.964944	0.648307	-1.40627	2.27963	-1.07127	-3.1046	-1.70114	2.16873	3.06809	-0.733789	1.35269	-1.19019	-0.715388	1.41295	0.0471109	-0.681026	-0.934389	-4.10852	0.068595	-2.11352	2.26919	-0.326113	0.483549	4.25204	1.10481	0.822632	0.590813
lib230524_AAGTACCCAATTGCGT-1	4.95634	1.14728	5.5724	4.62423	-3.16763	-9.1443	-0.407626	-4.16617	1.68543	-3.67386	1.64972	1.98938	0.922102	1.48809	-0.908119	0.623079	-0.42688	-1.01642	0.906826	2.98572	4.19147	4.56993	-0.625895	-1.34604	-0.793878	-3.49882	-1.69167	-2.82482	-6.42716	-4.97343	-3.81433	2.62499	3.10061	-4.75563	-2.54872	-5.13407	6.15855	-2.01832	-1.33166	-0.925287	-3.09667	3.74391	0.401056	4.74672	-8.65006	3.18975	3.46258	5.67481	-2.37722
lib230524_AAGTACCTCCCGTTGT-1	-0.132432	-1.95255	2.82452	2.26452	-0.131091	2.66208	2.63159	-0.683112	-0.365146	-1.37437	-0.623619	-0.916465	2.317	-0.941981	0.0256736	-0.756525	-0.279543	0.277642	1.36963	0.692204	0.47122	-0.155642	-1.65735	-0.766417	0.923521	-2.25058	0.331972	-0.280865	1.54602	-0.0864769	0.420482	-1.58139	0.770597	1.25078	0.0592213	0.689532	0.199032	1.05425	-0.850513	-0.739612	-1.96868	0.203321	-0.95416	1.04298	-0.135218	-3.00121	1.83324	0.323908	-0.297709
lib230524_AAGTCGTAGACGCATG-1	4.27316	-0.8756	1.36311	0.306677	-1.42794	2.24679	2.17538	-2.2333	2.16919	1.3543	-0.357288	-4.17551	1.68694	-1.71588	0.677279	-3.11055	-4.08341	-1.68072	0.783272	0.188878	0.0337174	2.69461	0.924932	0.320491	-1.53235	-2.71833	2.075	-2.66121	-2.03494	3.08108	-4.40607	-0.457173	4.0649	-3.60395	1.08705	1.97527	-0.159033	3.23076	-0.600636	0.161972	-1.21247	1.56014	-1.44343	4.1048	-1.20496	3.8396	-1.52981	-2.48456	-1.83091
lib230524_AAGTTCGAGCATACTC-1	-5.8204	-2.69581	-0.0620507	1.10401	0.61821	-1.87798	1.00599	-2.03826	2.0112	-0.710025	-1.24272	-1.00137	-0.424065	0.386935	0.363451	-0.735318	0.381234	-0.905024	-0.294921	-1.17397	0.811019	0.338138	-2.03135	-2.80209	1.95822	0.304372	0.203362	-0.944693	0.968288	0.622747	0.282483	-0.415538	-0.142294	0.623084	-0.288044	-0.203496	0.57605	-0.0256391	-1.3801	0.223939	-0.497598	0.54171	0.27339	-2.12276	-2.21095	0.770559	0.571588	-0.0360341	0.693352
lib230524_AATAGAGGTAGCTAAA-1	9.18491	0.931594	9.70916	5.71686	-0.192467	-8.81697	4.85905	0.00753784	2.28242	0.990356	2.97373	3.56803	2.4688	5.05648	0.407678	2.78475	-1.44705	2.43743	1.0329	0.0252392	-0.700532	-0.201658	1.18729	2.15961	1.02125	1.81342	-0.45058	1.00451	-1.15733	-0.609646	-3.50467	0.808941	0.660429	-1.9373	0.0438299	0.32615	3.58116	-0.687739	-0.695219	-0.644539	1.11359	0.946957	1.35062	1.67582	0.66379	-2.77499	1.60625	0.848104	2.06308
lib230524_AATCGACCATACTGAC-1	13.7418	4.93856	6.52135	7.39664	-1.00235	-4.6698	-0.799337	2.64823	3.58656	1.03301	6.43183	1.77806	1.63279	0.847662	0.0332982	2.52193	-1.36083	2.56719	-0.980341	-3.19773	1.88822	-1.11869	-1.51915	-2.09143	-0.131609	1.87381	-2.36527	4.83599	0.36984	0.754201	-6.9519	-5.5736	0.396555	-0.25768	1.40462	-3.52373	0.708938	0.879447	-0.0637837	-2.75023	-0.993906	-0.7396	-1.9641	-2.50566	-0.392069	-2.95721	-2.89634	-3.19012	-1.59328
lib230524_AATCGTGTCCACACAA-1	2.22872	-3.39693	9.74285	1.1341	-3.18166	-6.32309	2.11163	-2.44638	-0.0271464	-0.275416	1.79331	2.87315	1.03505	3.72323	-0.559239	2.57223	-1.47739	0.234624	-1.81528	-1.42101	1.85758	1.35498	1.2689	-2.15494	-1.26596	0.613682	-2.08783	0.207473	-1.28757	0.859823	0.855705	0.241292	0.815235	-0.460094	1.03235	0.905858	-2.61338	0.887378	1.03851	-2.16625	0.465767	1.04118	-0.914642	0.532684	1.2842	-0.00698992	-1.07156	0.0416733	0.52648
lib230524_AATGAAGAGAAGGATG-1	-1.76613	-1.8906	1.35807	-0.194238	0.360442	0.705982	1.07377	-1.82583	0.0182224	0.237879	-2.38027	0.639003	0.825868	1.25897	0.217851	-1.28615	0.168981	0.989327	-1.02985	1.61707	2.11525	-1.17773	1.60773	-1.1332	-1.53293	1.93021	-0.0312081	-0.361141	1.84868	0.737224	0.690222	1.72457	1.12318	-1.59859	1.99348	1.2042	-0.20903	-0.24945	-1.08517	-1.23072	0.365002	-0.39705	-1.66127	-1.05748	0.801212	0.0879099	-1.86171	2.3558	0.735547
lib230524_AATGAAGGTACTAAGA-1	-2.08666	-2.96388	0.39571	0.307145	2.3566	-0.235765	2.23857	-1.41944	1.62104	-0.482174	0.0191517	-0.467431	0.689078	0.206188	-0.846118	0.269862	-1.20839	1.74322	1.22979	0.399519	-0.0741106	1.33826	-2.34496	1.03354	-0.560869	0.0524646	1.31241	0.251249	-0.827538	-0.703598	-1.34148	0.855873	-1.71623	0.821564	-1.0597	-0.956722	-0.549993	-0.485411	0.0891532	1.17227	-1.53339	-0.913324	0.898593	-0.921326	0.302572	0.648697	-4.84457e-05	-0.556391	-0.667536
lib230524_AATGACCGTCGCCACA-1	-3.19721	-1.54246	-2.35275	5.67892	0.144702	4.65443	3.25367	-2.26562	2.51847	-1.41943	-0.657018	0.5726	0.585952	-2.37013	-1.63567	-1.06946	-0.695518	-0.0396399	1.10904	-0.858734	4.57511	1.54915	1.13129	0.229745	1.34774	0.0944838	0.00194598	0.263112	0.145763	-1.03668	-1.43052	-0.890367	-0.612765	-0.0586752	1.2391	-1.36915	-0.0796301	-0.920209	2.59303	0.868879	-1.97612	0.112443	0.15141	-0.201795	1.25692	-0.469862	1.53684	1.02829	1.81087
lib230524_AATGGAAAGGTAAGAG-1	-5.88691	-4.39926	0.602282	0.783466	-0.964485	0.0366148	-0.0557724	-2.07149	0.908403	-0.582209	-1.51013	-0.577991	1.27162	-0.676081	-0.2849	-0.420562	-0.467015	-0.077577	-0.0124225	-0.933717	-0.504302	-0.282235	0.678127	-0.433588	0.0711108	-0.891856	-0.4527	-1.36352	-0.0514221	-1.20408	-0.191895	0.674278	0.422699	-0.64183	-0.680033	-0.75392	0.0956567	-0.935076	-0.39904	-0.0749611	-0.984039	0.926161	-0.477019	-0.25057	-0.855972	-0.0526315	-0.504348	-0.405633	1.00425
lib230524_AATGGAAAGGTTACCT-1	2.71769	-2.586	7.02434	2.12267	-2.72238	-6.58417	2.34446	-2.60604	0.285681	-1.14365	-0.00643323	2.23372	2.33034	3.14561	-1.31461	2.62397	-1.68322	0.535289	-0.621895	0.567988	3.18873	0.912416	1.12998	-2.02594	1.00703	1.20426	-2.11891	-1.97666	-2.38464	-2.14244	-0.0671156	0.847736	0.476435	2.13252	-0.937846	1.85665	-2.23956	0.657051	1.06115	-0.319589	-1.12161	-0.387266	-0.139578	-1.34711	0.163818	0.523263	-3.10167	2.33617	0.533682
lib230524_AATGGAACAACTTGCA-1	8.80608	-1.79442	10.9284	3.43759	-2.71253	-2.80798	0.586817	-1.35468	-0.805082	1.16655	-1.18679	2.04588	2.9872	4.24016	1.65708	0.974835	0.836093	0.563574	-1.5059	1.04655	0.939398	-2.40083	1.97511	-0.391823	1.87836	1.73311	0.622204	4.07891	-1.83542	2.75254	-1.36393	0.781866	-3.62925	-1.21261	-3.29668	0.523279	1.90155	0.0313561	-2.38534	-3.1092	-0.619548	-1.21877	-2.02313	0.735847	1.10972	-2.21579	-3.97563	-3.95218	-0.440527
lib230524_AATGGCTTCCGTGGCA-1	5.50785	-0.855543	2.85587	0.977186	3.59433	-2.21429	3.8121	0.889419	1.46331	0.243977	-0.297191	-2.23472	-0.185581	-1.65389	-0.833468	-1.23783	-0.665459	-0.256	1.31305	-1.23413	-1.91595	1.47727	2.66225	0.167562	1.05158	0.413357	-1.0352	2.55615	-0.118304	0.286685	-2.3777	-1.8958	-0.634454	0.783098	-0.167158	-0.345089	-0.193798	-1.68726	-1.24484	-1.4976	-1.82962	-2.162	3.19069	-1.28048	1.2606	-1.62769	-2.16175	-1.35268	0.825946
lib230524_AATTCCTAGACATATG-1	14.6856	-0.442168	10.4646	1.53786	-0.148024	-2.71052	1.17426	2.42329	2.52316	3.24146	2.00267	0.23701	4.57323	2.2983	1.62453	-0.711452	1.25375	1.41631	-1.36551	0.572181	-1.23509	-0.960682	-0.163501	1.03374	1.34023	1.92296	3.91076	1.60167	1.3354	0.907928	-1.35796	-3.24814	-1.44226	1.03247	-1.13298	1.51956	1.17279	1.08647	-0.820612	-0.792444	2.37433	-0.464374	-1.60089	-2.12803	2.44696	-1.84432	1.81249	1.06853	0.636041
lib230524_ACAAGCTAGCCAAGTG-1	-4.76483	-3.60779	0.708011	1.73384	-0.551818	0.829759	-0.413668	-1.49928	1.37737	-0.745333	-2.20724	-0.299175	-0.583435	-0.165194	0.45406	-0.760104	0.63577	0.224773	1.27852	-1.07484	0.520654	0.965986	-0.683154	-0.743251	1.99721	0.387552	0.830949	-0.40706	-1.18977	0.431263	-0.643519	-0.662733	1.38047	-1.30265	0.83029	1.87147	0.272289	-0.535898	0.564345	1.22907	-0.25649	0.00556666	2.28191	0.0668623	-0.609569	0.524455	-0.347561	-2.0818	0.879303
lib230524_ACACGCGTCTTTCCAA-1	0.204901	-3.26011	0.424258	-0.643358	3.29548	1.1621	0.803277	-0.936136	2.27777	0.406863	-0.292615	-2.16094	-0.307301	-0.0393665	-0.223799	-0.57361	-1.50781	1.32295	0.346803	0.091854	0.0359171	-0.937269	1.49275	0.658085	-1.08411	0.182796	-1.19301	-1.59738	0.0338396	-0.432074	1.3625	0.477333	1.35212	-2.25894	0.126705	2.63563	0.132646	0.433739	-1.52403	-2.72921	-1.22652	0.614862	-2.26855	-0.0466228	-0.209626	-0.160055	1.00119	0.0753738	1.45633
lib230524_ACAGCCGGTAGGTTTC-1	6.30369	-0.861922	0.697551	1.09597	5.37502	1.43466	4.36403	1.67717	2.91627	1.92838	-0.382228	-1.57235	1.68954	-3.67001	-0.576285	-4.19907	0.602859	1.49826	0.680334	-0.487115	0.556614	-1.9233	-0.861425	1.25729	-2.98774	0.0910838	3.86416	-1.04905	2.00846	-0.856209	-1.03276	0.563621	-2.40575	-0.483155	1.38931	-0.565723	-0.108122	1.6372	0.59162	-1.78409	-3.81326	3.58356	-1.50216	-2.0169	-0.477132	1.92762	0.268703	1.10935	1.1323
lib230524_ACAGCCGGTCAAAGAT-1	-0.0541451	-1.9442	-1.21581	1.3232	2.93651	1.2008	0.518002	-1.1389	1.12381	0.190887	-0.92046	0.642824	0.253156	-1.01122	-0.404815	-3.2061	-0.595949	-0.415972	0.455076	0.4664	2.5871	1.94949	-0.269775	-0.367166	-0.740372	-1.10652	1.22704	-0.0753017	1.89145	0.737362	-1.43647	0.252277	-0.827235	-1.718	2.70736	0.472449	0.440647	0.708042	-0.316968	-1.25276	-0.987934	0.582897	0.489583	1.68187	-0.709143	0.841041	-0.959375	0.158003	0.377531
lib230524_ACAGCCGTCGGATTAC-1	0.851171	-4.75747	5.09508	-0.152628	-0.814804	-0.922087	3.63449	-2.46213	1.44045	-0.168469	-0.434359	1.40046	2.3307	-0.716095	-2.04762	1.02637	-0.409956	1.42251	0.428123	1.09238	-1.40778	0.985607	-1.44687	0.122616	-0.774116	0.0252604	1.50581	-1.91992	2.24594	-1.59536	2.66865	3.45039	0.797777	-0.748294	1.0057	-1.14948	-0.477007	-0.314018	-0.182437	2.00922	-2.2022	-0.532674	0.468096	0.665846	-0.0511147	2.3457	-1.86735	0.121397	1.68662
lib230524_ACATCCCAGTTCAACC-1	-14.6756	15.7087	9.11957	-6.15809	2.74834	-1.06301	1.04505	-1.10225	0.903925	-2.08574	-2.24176	0.851293	1.86506	-5.57331	9.87144	1.42268	-0.559278	-1.54704	0.996899	-4.27919	2.8528	2.72062	-3.9626	2.90264	-1.76193	1.39753	-0.192686	0.473066	1.39867	2.41093	6.18967	0.618588	1.95738	-3.60074	0.844095	1.74443	-2.069	-2.61078	3.8581	-3.78573	2.74252	-3.72555	3.47018	-0.632443	-0.758813	6.70764	-0.145925	0.350935	2.0796
lib230524_ACATCCCCACCGGAAA-1	3.79094	-2.10427	4.6982	3.18042	0.379985	1.19846	3.12307	-1.84004	-1.75389	-1.87065	-2.97195	0.441273	-0.0317994	9.54765e-05	-1.479	0.139566	0.955002	1.52485	-1.4124	1.44095	-0.7517	-0.664567	-1.58413	1.43981	-0.640132	0.982747	0.817878	2.50141	2.44519	1.29773	3.50238	0.837	0.0484366	2.16465	-1.06036	0.877708	-2.19052	0.497974	-1.81756	-1.12118	1.45606	1.45548	3.1517	1.47842	-1.01686	-0.13008	1.89888	-0.550072	0.970916
lib230524_ACATTTCGTCAACCTA-1	-3.19839	-2.04919	0.285922	1.76239	-1.58697	1.11336	2.73757	-2.41959	0.9756	-1.55555	-0.0113397	-2.276	1.11759	-1.543	-0.839703	-1.28953	0.515322	0.835478	0.345614	-0.195844	0.836548	-1.39376	0.449259	-0.655745	-0.259769	-0.56201	-0.367682	2.02776	0.534108	-1.35362	0.000720906	-2.72106	1.09794	-0.10229	0.0309154	2.09578	0.424727	-1.04885	-1.24853	-1.54787	0.543398	-1.96375	-1.21212	-0.249712	-1.84744	1.87706	-0.149286	0.155265	-0.235858
lib230524_ACCAAACCAACCAACT-1	8.27965	-1.16661	1.92237	-3.36227	1.09675	1.00949	0.796308	-0.389191	1.41709	0.731713	-0.656995	-2.03272	1.05605	-0.59712	0.0969998	-2.19981	-0.674069	-2.85407	1.32544	0.775458	-1.16861	2.92385	2.38512	0.593205	-1.49117	-0.760321	0.817697	-0.248672	-4.03319	4.09686	-6.59565	1.90731	2.66922	-2.48017	6.01734	3.41644	-0.187429	3.4514	1.03839	-0.70707	-0.89282	3.41381	-1.74768	2.72051	-1.61652	3.89714	-2.43062	-2.3823	0.586727
lib230524_ACCAAACTCTCAACCC-1	-1.97527	-1.91474	-0.729114	0.32593	-1.39531	1.42278	-0.320775	-1.93883	1.73414	-3.05846	-0.486358	-1.06371	-0.0759667	-1.70658	-2.05356	-2.6711	-0.783196	0.138244	0.441863	-2.20544	0.448636	-0.972994	-2.09988	-1.31116	-1.67785	1.44248	-0.671028	1.47911	-0.0357645	-0.722739	-0.0279289	-1.095	0.54696	0.11421	0.902139	2.49346	-0.36784	-1.02433	-2.28279	-0.132515	1.17478	-0.821719	-2.51502	1.07622	0.244853	0.544942	1.00043	-1.20809	1.56622
lib230524_ACCATTTAGAAACTGT-1	2.85666	-3.08558	2.71703	0.884428	2.96525	-0.151841	3.55739	-2.91511	1.1561	0.976531	0.106652	-2.2112	2.95971	-1.78026	-2.02328	-0.958899	0.0545679	-1.33073	-0.12322	2.81757	0.493588	-0.419357	-1.38093	1.23693	-2.44502	-0.730013	3.55573	-1.36404	2.57151	-1.37102	-1.37999	1.93486	-1.46383	-3.82815	-0.575032	-0.875203	-0.919605	-0.595689	-0.147569	-1.98494	1.45791	-0.444216	-1.61784	-1.95892	1.63555	-0.257113	1.15125	1.20553	0.829189
lib230524_ACCATTTCATGGGAAC-1	1.70855	-2.86198	1.52429	-0.235999	-0.3476	2.30582	3.74142	-2.04782	0.991069	-0.552138	0.797436	-2.84024	1.53759	-1.41992	-0.966563	-0.136252	-1.09026	1.2336	2.73935	-1.11543	-0.300957	1.96525	1.34086	-0.935355	-0.655739	-1.66311	1.09845	-0.794039	-0.640867	-0.508257	0.205253	-0.153224	-0.0881506	1.4238	0.698006	0.178329	-1.83385	1.53407	0.937448	0.186893	-0.279171	0.333306	1.95616	-0.856879	0.747833	-0.759685	-0.500792	-0.609708	1.60779
lib230524_ACCCAAACAACGGTAG-1	5.04161	-1.45809	3.98121	2.26803	-1.40554	2.95519	1.81367	-0.670174	-0.196154	-0.97568	0.589547	-0.574542	1.95472	-0.544771	-0.62599	-1.85959	-0.717518	1.11338	-0.0514755	-1.8246	-0.480722	-1.45956	-0.95158	-0.583695	-1.33426	-1.19188	2.4783	1.74447	1.5336	2.35179	-1.46407	-1.16979	0.029881	0.5665	0.571665	1.09063	-0.704156	1.28677	-1.8279	-0.160819	0.983684	-0.673463	-0.0800947	0.0391863	0.0652347	-0.779555	0.718004	-1.90181	1.32841
lib230524_ACCCTCACAGCGACCT-1	7.56513	-1.24281	9.72889	-0.0479426	-2.76898	-5.53054	0.557643	-2.52472	0.65623	0.735734	-0.748537	1.20084	-0.501316	3.47221	-0.713292	0.973766	-0.833301	2.06766	-2.9045	1.21423	2.52941	-0.470491	0.762786	-1.41899	1.09656	0.622738	0.795305	0.614237	-0.640174	1.94612	-0.872602	1.92689	-2.57009	-2.87056	-3.91147	0.311556	0.384848	-0.780363	-0.654729	-0.642297	-0.71156	-1.24857	-1.82594	1.47006	3.89144	-1.31104	-1.98306	-0.376816	-0.513418
lib230524_ACCCTCATCGCGTAGC-1	8.56375	-0.762142	5.92554	3.18771	1.53884	2.62342	3.97745	-0.470842	-0.502403	-0.314191	-1.02095	-0.438603	2.82889	-2.98947	-1.2579	-0.0230744	0.0800599	-0.26675	3.74493	1.866	-0.819223	0.830696	-0.815565	1.41536	-0.14117	0.681464	0.800572	-0.873115	1.9609	1.89685	-0.150461	1.44195	2.99767	-1.69972	-1.90837	2.77945	0.0471725	1.18705	1.37256	1.62237	3.26903	0.348363	1.00982	-0.918198	-0.303335	-0.855206	1.24153	-1.40273	-0.443742
lib230524_ACCTGAACAAGTTGGG-1	-4.74342	-2.60303	1.2468	-0.60407	1.10598	-1.86515	1.39736	-3.5063	0.523429	-1.09266	-1.78537	-0.77187	-0.657055	0.978323	0.309839	-0.817574	-0.437112	0.367293	-0.749711	-0.334778	-0.599536	0.922791	0.246814	-0.853179	0.669538	0.507619	-0.827826	0.315006	0.0602087	0.268566	0.125428	0.132772	-0.473552	-1.29164	-1.31246	1.34723	0.786456	0.0247343	-0.102811	0.723317	0.486154	0.423352	0.372134	-0.529782	-0.179027	-0.60672	-0.218835	0.0512488	-0.552244
lib230524_ACGGTCGTCGAAACAA-1	5.21562	-2.48995	8.4683	1.47439	-2.10738	-4.62453	0.354926	-2.15206	0.515539	0.572911	1.40419	2.00871	1.74127	3.14982	0.364399	1.06585	-1.56209	1.1845	-0.515153	-1.17262	2.54296	1.3539	0.865228	-0.724386	1.71961	1.07879	0.542181	0.0153217	-0.0521528	-1.15315	0.730287	0.223359	-3.27262	0.653796	0.364228	-1.58795	0.739696	-1.13818	-0.434444	1.45792	1.47205	1.01614	-0.896342	-1.49388	0.391933	0.0268418	-0.00644849	-1.00763	1.30344
lib230524_ACGGTTAGTGAATATG-1	0.295392	-2.54611	6.0368	3.54003	-1.94757	-7.682	1.20534	-4.43302	-0.271268	-1.68624	0.535834	0.158241	1.71837	2.73096	-1.08559	1.29163	-1.9665	-0.897258	-1.5426	-1.15166	1.14717	1.43372	1.0382	-1.80003	0.887457	0.999129	-2.07489	-0.82948	0.235495	0.207837	0.774037	1.03089	0.0870218	1.13733	0.704246	-1.32757	-0.653976	1.06319	-0.73807	-1.07775	-1.07796	0.704468	-0.496908	-0.599281	0.702918	-1.83916	-1.69878	-2.91831	1.67937
lib230524_ACGTAACGTTGAATCC-1	5.95543	-3.02713	4.26968	-2.43194	1.21626	-1.5895	-0.326067	-0.980258	0.221651	-0.101602	-0.277649	-0.580769	2.41855	0.414022	0.522312	-1.43507	-0.063808	0.777352	-1.74871	0.312021	1.1874	-1.72187	0.425487	-1.61411	-0.0986171	1.63404	1.22545	0.220331	1.81153	-0.163482	-1.55839	-0.202588	-0.626619	0.708846	0.694325	0.819434	0.109098	0.718887	0.770941	1.83956	1.2343	-0.769055	-1.66763	-1.08243	1.14127	2.70834	0.312992	1.12769	-1.08905
lib230524_ACGTAACTCATTCGGA-1	-5.75728	-3.8029	-0.0227504	0.687434	-1.50167	-0.543261	1.32023	-2.64909	-0.691385	-0.900494	-0.293879	-1.23446	0.63394	-0.709779	-0.0358077	-1.01181	-1.38759	-0.248258	1.17184	-2.19519	-2.19713	-1.38907	0.856416	-0.341957	0.54526	-1.77463	-1.94237	-0.483175	0.872309	-1.28651	1.05083	1.08079	0.500805	0.346318	-0.713841	-0.540382	-0.81623	-1.22111	-1.1	0.427	-0.341551	0.655582	2.62428	0.656468	0.134604	0.720466	-0.504146	1.43378	-0.436889
lib230524_ACGTAACTCGCGCTGA-1	10.3055	0.317388	6.64726	1.02226	-2.49984	-2.93914	-3.5361	-2.22646	-0.454992	-0.00700053	-0.648626	-1.58574	0.700131	3.31379	3.4481	-4.70058	4.75497	-3.9766	-1.26895	0.558765	-0.52058	2.83167	0.902962	1.75763	3.20919	-0.744679	2.94792	3.97034	-0.575203	3.4258	-3.2191	-0.945246	4.59327	0.930987	-5.15941	-0.0891816	-1.18256	0.72992	-3.27737	2.19422	-0.960218	2.03065	-0.138782	0.0770252	-1.28552	-4.02848	1.37168	-0.711966	4.09579
lib230524_ACGTACAAGGCACTAG-1	-4.32751	-2.79735	-1.1209	2.0342	-0.0568544	-0.0941313	1.58205	-2.03914	1.39721	-0.563727	0.424055	0.232153	0.570932	0.35699	-0.103798	-0.0950738	-0.188017	0.0320543	1.66571	-0.503665	0.579406	1.71904	1.04747	-0.447707	0.591199	-1.7195	1.07021	-0.79729	-0.601415	0.0654293	-0.119181	0.49078	-0.568274	-0.602702	-0.892166	-0.917877	-0.656678	-0.598106	-0.880856	0.469502	-1.52146	0.391893	-0.549332	-1.07804	-0.885387	-0.0516135	-0.300247	-1.10052	-0.429568
lib230524_ACGTACACAGTCTCTC-1	7.27884	-2.33533	8.22984	1.18847	0.439406	-2.12316	2.57041	0.0828589	0.793798	1.72638	0.496064	3.01783	2.88079	-1.16152	-1.18429	3.49665	-0.890021	0.687868	0.0209596	-0.496448	-1.09467	-0.205143	-0.517164	0.0909486	-0.284847	1.29196	-1.30762	0.159553	3.20026	-1.86127	1.45197	2.30734	-3.55125	0.976762	1.71843	2.02904	1.37789	-0.159738	-0.0284742	3.32048	-1.11252	1.96274	0.383194	0.935082	-0.710327	2.12659	0.198977	-0.671768	-0.725376
lib230524_ACGTACAGTTCCAGGC-1	-1.696	-2.7436	5.91017	2.91584	-3.12623	-3.21337	2.31559	-3.14971	0.915885	-1.88567	2.01959	1.78591	1.67837	1.51729	-1.53051	0.772681	-0.787423	0.457412	-1.40451	-0.5133	2.01484	0.753154	1.25567	0.50941	-0.181863	-1.06534	-3.40835	-0.652433	-1.38306	1.82865	-0.0343796	1.75746	-0.26018	0.906601	0.0260456	-1.97256	-0.802542	-0.609369	2.56907	-0.473252	-0.494283	-0.590048	-2.57856	-0.767821	0.304634	-0.508731	0.575171	0.574608	0.758426
lib230524_ACGTTCCGTATGGTTC-1	2.86786	-0.573358	-0.590982	2.85486	3.9807	1.89383	3.91652	0.620415	2.58704	1.15045	-0.103397	-1.17048	0.781618	0.0383283	-0.517197	-1.76155	-1.08778	0.735842	2.75532	-3.35468	-1.26963	0.219714	0.637839	-0.530185	1.62568	-0.658781	0.358022	-1.92532	0.559885	0.150239	-1.44383	0.27798	0.336661	-2.14381	-0.218597	-1.2525	-1.47831	0.630905	-0.379786	0.337231	-2.12649	0.0663937	-0.861937	0.441388	-0.398648	0.349484	0.625758	-1.11412	-0.258664
lib230524_ACGTTCCTCATTGTTC-1	-2.229	-3.29041	2.03498	0.656313	-1.58505	-0.136082	1.59504	-2.5878	0.588114	-1.40168	-0.727076	-1.33725	1.09861	-0.356889	-0.140408	-0.872399	-0.393308	-1.38559	-0.10997	-0.442005	0.136088	1.8585	1.10788	0.424387	-1.09171	-1.17134	-1.45653	0.0559717	-0.215605	-1.1866	2.30772	0.433162	3.23533	0.737582	-0.396051	0.266688	0.920502	-1.08299	0.360106	2.52949	1.52506	-0.0758228	-0.201391	1.39298	-0.310282	0.100876	-2.39696	0.110346	1.64583
lib230524_ACTACGACAATTTCCT-1	-3.28684	-2.76334	-0.212002	2.55797	0.66467	0.175495	0.786843	-1.06125	0.75917	-0.576713	-0.493121	1.17508	0.889833	-1.00006	-0.431131	0.072193	-0.724046	0.870136	2.91543	-0.321948	-0.0713436	1.78025	0.791561	-0.166141	0.677696	-0.397409	0.300778	-1.91149	-1.02009	-0.978085	-1.33792	0.682989	-1.29192	-1.22155	-1.03184	-0.497077	-0.703757	0.222728	0.691411	0.277946	-1.37882	1.78762	-0.98228	-1.70699	-0.766341	1.04409	-2.12503	-0.719428	0.117252
lib230524_ACTACGACACTACAGT-1	-1.33536	-2.62413	0.614896	1.53089	-1.64566	1.42036	0.483214	-2.67546	-0.582847	-1.71132	-1.94511	-1.68884	1.59971	-1.12314	-0.430081	-1.71923	-0.343883	-0.545078	-0.701295	1.02019	0.964283	1.80968	-1.50874	1.45803	0.7417	-1.64187	-0.650867	0.69315	-1.51446	2.4255	0.755858	-0.139013	2.81073	0.446851	-0.190058	1.70564	0.232542	0.564766	1.78106	-1.19618	-1.18507	0.356839	-1.01542	0.648503	-0.88529	0.134156	0.484941	0.353407	1.029
lib230524_ACTATGGCAGAAGCTG-1	-5.08956	-3.22554	-1.21074	0.288403	0.720934	-0.702133	1.0079	-2.81611	0.392545	-1.39372	-1.93084	-0.984939	0.314165	-0.875794	-0.702952	-0.705731	0.975847	0.581677	0.87261	-0.426688	0.0142036	0.117275	-1.32844	-1.44063	0.0819624	0.0923936	0.0724828	-1.13332	-0.689223	-0.673613	0.413571	0.955121	-0.156051	-0.539177	-1.85529	0.187496	0.264488	-0.451273	-0.0898765	0.701858	-0.55153	-0.363256	0.69757	0.104132	0.231897	-0.808934	-0.123345	-0.455434	-0.0923894
lib230524_ACTATTCCACTCCACT-1	-5.01811	7.19469	5.89861	-0.667995	2.38633	3.82112	3.41001	-1.78354	1.16391	0.386781	0.0492947	0.850657	1.1133	-2.00386	0.747274	-1.50563	-2.00087	0.972863	-1.89745	-0.144164	-1.1942	1.6736	-3.8011	0.926356	-0.0236506	1.65523	-2.2663	0.426854	2.46183	0.487434	3.17843	2.55687	1.33922	2.83181	-0.460429	4.48462	-0.623511	0.570482	2.08228	-6.02893	-0.462164	0.850469	2.24707	-3.75799	-3.23681	1.58334	0.379818	-0.0744058	2.79409
lib230524_ACTATTCGTGGGATTG-1	8.04215	1.35219	5.45334	1.70272	-0.645591	-0.716437	1.79963	-1.20583	-0.690054	2.69473	0.650665	-1.74949	0.983501	0.352148	0.324731	0.605265	-1.18774	0.644792	1.21572	2.08542	-2.38369	-1.25581	-2.9089	0.579019	1.24796	-0.669354	0.850061	-1.92071	-0.559747	-0.764192	0.776623	-0.522556	-0.4346	2.25285	-0.426343	1.37474	0.669026	1.67993	1.68055	0.382241	1.66669	-1.00358	-2.78583	-0.239164	-0.0553497	0.110822	1.98708	-0.474641	-3.7305
lib230524_ACTATTCGTTATAGCC-1	-7.15302	1.28182	1.16997	-2.02549	-2.16953	-1.31802	-1.41551	-2.8543	-0.704741	-1.24446	-0.135935	-2.15105	0.397291	0.196911	1.68558	-0.148905	-0.12856	-2.43712	2.49977	-0.918138	1.21649	0.0674438	-2.84237	0.23679	-0.633769	0.631805	-2.44124	1.17998	-0.258588	0.983141	-0.518249	0.836303	1.1565	2.95532	1.37188	0.185828	-1.25926	0.188361	-0.0574802	1.94472	0.521541	1.02177	-0.41745	0.0744617	1.95071	-1.15612	0.451295	0.501023	0.46696
lib230524_ACTATTCTCTGGCTGG-1	1.35247	-2.66264	7.05886	0.995775	-4.13135	-8.85012	2.77442	-5.34441	-1.06455	-3.23084	0.939101	2.87097	1.56241	5.93744	-1.07417	4.46709	-3.88359	2.79919	-4.20946	-0.895179	4.57416	1.7186	0.434503	-3.4201	0.479405	3.64917	-1.95128	-0.965561	-0.760281	-1.38857	0.606052	2.33249	-1.48372	0.718201	2.06065	-0.216805	-3.22802	-0.751497	3.06359	-0.522872	0.0373795	0.905214	-1.52645	0.765572	0.989822	-0.0269819	-1.40547	3.11793	0.141968
lib230524_ACTGATGCACGTTGGC-1	14.5634	5.40682	4.90596	9.13863	4.33158	6.18953	10.5072	1.36323	3.67635	0.376215	2.65904	0.0530745	1.88993	-5.62115	-1.60221	1.08619	-0.540638	-1.70881	3.54048	2.53042	-3.60596	3.61068	-7.12555	6.57968	1.40272	1.22577	1.71876	0.0153231	0.861187	-1.72173	-0.611723	-1.83217	4.31717	1.69829	-5.0503	-7.14907	8.77849	-3.26182	1.8964	3.19981	1.09787	1.78153	-3.94687	-0.569213	-4.65605	-1.44991	-8.3369	0.125564	-3.02761
lib230524_ACTGCAACATCTATCT-1	-6.86135	4.06668	-2.95883	3.43441	-3.56109	-6.40069	7.06059	10.4421	-8.7019	-0.404099	-2.97284	-4.50516	3.0639	-2.18872	-0.137186	-3.35365	0.646332	-1.8141	-4.44027	-5.35944	-1.20305	0.533967	-1.13271	2.93811	1.13324	-3.24969	-1.58277	-0.895912	1.11347	0.761795	0.683056	0.678599	-3.85789	-0.107026	-0.435769	-2.05112	-2.62783	5.27857	-3.88393	1.14579	-0.865496	-0.327661	-0.854274	5.54768	-3.38095	1.26951	-2.68447	2.11532	-5.86691
lib230524_ACTGTGAAGTTGGACG-1	6.25196	-1.75232	10.8707	1.47595	-4.75953	-12.1105	2.37274	-2.87671	0.580185	-1.23209	4.09051	6.5029	2.18951	6.36941	0.377868	3.97741	-0.344624	1.96203	-5.44403	-1.7438	3.24817	1.27756	0.801092	-2.97257	0.375466	1.85988	-2.78956	0.781035	-1.90103	3.24006	-1.32475	2.93999	-0.882802	0.587652	0.847186	0.394942	0.170838	0.42707	1.61194	-1.82963	-1.43352	1.11804	0.111248	1.81609	3.32452	-2.18039	-3.09329	0.863092	1.11892
lib230524_ACTTAGGCATCTCAAG-1	-0.356115	-4.69081	6.07241	0.660176	-3.8748	-3.45717	0.852837	-2.61001	0.529599	-2.13372	0.483637	1.76673	0.809169	0.773797	-0.0728648	-1.76891	-1.1161	1.75247	-1.2458	-1.13768	1.12945	0.135155	-1.55704	-1.08651	0.243982	-0.759018	1.40191	0.487392	0.235564	0.465589	1.68354	0.0694308	-0.21871	1.47339	-0.0388854	0.152024	-0.650533	-0.0472204	-2.15625	-1.76921	1.26707	1.12193	-1.0086	-1.30509	-0.606124	1.35777	-0.383314	-0.25102	0.878896
lib230524_ACTTAGGGTAGATCCT-1	2.11887	-2.38892	4.19734	1.83652	-1.76708	-1.17287	3.00123	-3.33177	0.881434	-0.844046	-0.306904	0.164241	0.250061	0.511877	-1.0968	0.406843	-0.0269842	1.19667	0.578196	0.0291983	-0.649932	1.83095	-1.40115	-1.40829	-1.6514	-1.98682	1.03308	-0.971878	1.75064	-1.56249	2.56879	1.74158	1.70356	-1.0911	0.778572	-1.44929	-0.0226316	-2.39198	0.311706	3.60672	1.2866	2.57685	-0.144475	0.287034	3.09647	3.05628	-0.309705	-2.91979	1.14359
lib230524_ACTTAGGGTTCTAAGC-1	4.76216	-2.02074	9.7289	1.84775	-4.0729	-7.76093	2.25361	-2.30468	0.780601	-0.913628	0.565735	3.29188	-0.248993	5.96915	1.2832	4.61917	-1.29899	-0.764184	-4.20813	-0.576332	3.62721	1.28767	-0.0962051	-2.79637	1.31282	0.33322	-3.35169	-0.371485	-1.66173	4.08263	-2.53919	2.75116	-0.982856	-0.457091	-0.731574	2.0246	-2.83088	0.609403	1.55189	-1.60971	-2.50026	0.852865	0.931901	-0.303735	2.82661	-1.65131	-2.01898	-1.34941	-1.65469
lib230524_ACTTCCGAGCGACTGA-1	-1.21172	-2.74963	1.78404	0.263783	-0.126424	0.966855	0.0034525	-0.632754	-0.617888	-0.656322	-3.0152	-0.834317	1.90358	-0.683652	-1.55357	-0.621676	-0.809085	-0.684707	1.90895	-0.473685	0.433304	-0.0249192	0.745012	-1.88219	1.23885	-0.384102	-0.601614	-0.08719	-0.647098	-0.118378	-1.44607	-0.74229	0.150529	-0.286757	-1.79992	0.592777	-0.254882	-0.363403	0.187011	-0.972088	0.806762	0.28887	0.462303	0.635395	0.627722	-1.83461	-0.342954	-0.548679	-1.96482
lib230524_ACTTCGCAGCCTCTTC-1	-0.543852	-2.22997	6.99738	1.667	-5.30337	-6.48529	1.61393	-4.07801	-0.0923083	-3.5361	1.29081	1.2957	-0.767831	3.34109	0.133119	1.95545	-1.85774	2.4344	-1.86071	-1.58916	2.16275	2.38863	1.03043	-1.60372	0.178594	1.19081	-2.83164	-1.85074	-1.39038	-1.09371	-0.466237	2.03907	-3.47052	-0.193051	-0.417691	-1.51923	-2.86952	0.468538	4.51029	-0.170169	-0.64566	-1.73593	-2.20141	-0.256596	-0.610527	1.04125	0.717594	1.93659	-2.30044
lib230524_ACTTCGCGTGTTCATG-1	5.26648	-4.18135	8.37079	0.567474	-2.16242	-3.35093	3.02679	-1.39608	-0.286238	-0.321826	1.64417	1.88798	2.87991	0.528059	0.426014	-0.262774	-1.20643	-0.259031	-2.86025	-1.43123	-0.11703	-1.45799	1.52755	-0.559272	0.877882	0.646118	0.783411	2.48515	2.62117	1.60753	2.71233	-2.06151	-0.318706	3.62717	-1.18001	3.61734	-1.30475	1.66903	-0.954782	-1.14975	1.44552	0.612504	-2.21133	-0.772463	-0.283725	0.331345	1.19538	1.86546	-2.21349
lib230524_ACTTTCACAATTGCTG-1	-1.91585	-2.93286	-0.316254	2.20216	-0.732899	0.539987	0.500639	-3.50471	1.15116	-1.35408	-0.30705	-1.63934	0.942159	-1.16117	-0.34737	-1.35794	0.520537	0.633559	-1.05396	-0.500942	0.530248	-0.295465	-0.842793	-1.07806	-1.01184	-0.391433	0.443479	1.71551	1.56439	-1.15116	-1.66433	-2.26739	0.874486	-0.78799	-2.10323	1.20601	-0.909466	-1.30974	-2.62425	-1.5141	1.62331	-0.550311	-1.82252	-0.15116	0.762401	0.179013	-0.242643	-0.515319	0.00555214
lib230524_ACTTTGTAGAAAGCGA-1	4.97555	-3.72354	4.69261	-1.80143	1.65555	-2.36442	-0.17995	0.482064	0.81586	1.13073	-0.353092	-0.478048	1.44759	-0.0514275	0.817134	-0.0466212	-0.338656	0.782796	-1.01851	-0.594575	0.257784	-1.13187	0.807365	-1.86594	-0.149506	0.330574	1.03991	1.48179	1.21026	-0.451079	-1.60636	-1.54513	-0.832127	1.41518	0.938643	0.499511	-0.982961	-1.08936	0.56748	0.257692	0.728647	-0.736766	-1.46666	-0.263574	0.821398	2.16729	1.71055	0.6623	-0.401539
lib230524_AGAAATGAGCTGACAG-1	3.09531	-0.990785	4.63026	-0.354452	-2.62852	-2.21113	2.07451	-0.0287691	-1.23662	-1.78374	-0.37216	-0.606672	1.17555	-1.48605	-0.213845	-2.55962	-0.264104	1.30433	-1.52843	-1.02597	0.87944	0.300876	0.0192555	1.34183	-0.682571	0.951619	0.840647	0.99255	0.366047	-0.845708	1.70337	-2.57952	-0.0625278	-0.018202	-1.37952	0.440105	-0.857813	-0.648336	0.533461	0.56723	-0.958236	1.00807	-0.682541	2.26723	-2.14488	0.520405	-0.438118	-2.26294	-0.29734
lib230524_AGAAATGCAGCTGTGC-1	5.4801	-2.85164	4.18848	-0.0512546	-0.680117	0.465401	5.47048	0.00785897	1.00916	-0.549895	1.29861	-0.775263	3.29001	-1.34037	-1.43957	1.26897	0.631598	0.468008	-1.71166	1.23429	0.115732	-1.44554	-0.784796	1.71144	-1.74492	-1.60426	-0.602335	-0.223424	1.34195	0.117188	2.56724	-0.724438	2.74506	0.800251	-2.31551	0.153488	1.176	-0.324258	-2.08634	-2.21995	1.49122	-0.422783	1.3957	-1.46964	-2.20224	-3.7352	2.73118	-0.370754	0.208255
lib230524_AGAAATGGTGGAGAAA-1	0.883231	-4.56157	3.18073	-2.43236	0.384879	-0.220816	0.945899	-1.69274	-1.17254	0.523284	0.448606	-0.988407	0.756567	-2.45281	-0.621902	-1.88954	0.483826	0.901093	0.64405	-0.162208	0.107824	-0.509283	0.361952	-1.03423	-1.96419	0.668699	0.356197	0.682376	0.230854	-0.783354	1.18437	0.57569	-0.691596	-0.177008	-0.960104	0.0264655	-1.95432	-0.469907	-0.108078	-1.92393	-0.501004	-0.246973	-1.32784	0.121756	1.70835	-1.00314	0.789983	1.29686	-0.0266093
lib230524_AGAACAAAGACGAAGA-1	-4.69201	-3.22818	-0.134473	-0.221501	0.524902	-0.673315	2.15443	-0.888238	0.22308	-0.60008	-2.21013	-1.39414	0.31226	1.27799	-2.15243	-1.29318	-0.731482	0.372268	-0.0275613	-1.53031	-1.6914	0.826909	0.396218	-0.469148	-0.907457	-0.691856	0.367796	0.322898	0.278604	-0.885161	0.292211	0.823694	-1.38335	-0.0382788	-0.599355	0.560524	-0.218087	-0.668561	-0.267692	1.20691	-0.257807	0.678611	-0.451007	-2.01801	-0.81114	-0.945313	0.582249	-0.118113	-0.112444
lib230524_AGAACAACATTGTAGC-1	7.19434	-1.13926	10.8564	4.64398	-3.21416	-2.7383	0.680141	0.998451	0.168646	0.344284	-0.662203	1.58837	3.86319	1.62343	-0.978695	1.70573	0.226034	1.88406	0.884031	-1.71552	2.13569	-0.793207	0.996573	-0.777111	-2.78747	0.10446	2.66676	2.42471	-0.589536	1.18853	2.62941	-3.36825	-0.366529	0.744843	2.17908	4.68116	2.21605	-0.360726	-0.817426	-0.785792	3.694	0.141986	-3.46696	0.48418	2.14169	0.704558	-0.394867	-0.246129	-1.16738
lib230524_AGAACAAGTGTACAGG-1	6.34388	2.82856	1.16439	2.29708	-1.91853	-0.428146	3.63482	1.03359	-0.423633	-4.09647	0.029881	0.138994	-3.27759	-2.53582	0.656892	0.60504	0.384615	-0.0679848	0.849192	-2.04977	-2.33483	0.554542	0.543666	-1.49034	1.39354	-0.923565	-1.53755	1.30436	0.730799	0.587704	-2.3135	1.41783	1.57594	-2.34158	-1.30363	-1.24327	0.39061	1.58715	-5.38377	-1.29315	-1.88072	-1.37586	-0.801076	-4.90705	-2.52816	-3.29014	0.373437	-0.15516	8.40408
lib230524_AGAAGCGCACCGTCGA-1	-1.26498	-3.16368	-0.894673	0.390787	3.28045	0.485798	2.22819	-2.62348	0.337233	-1.45516	-2.48138	-0.777062	2.44489	-1.28519	-0.693336	-0.56928	1.02392	-1.52612	-0.854938	-0.088325	-1.13993	0.917037	-0.183943	0.797619	1.22779	-1.75122	-1.49861	-2.03942	0.153466	1.34507	0.653598	0.740278	0.329741	-1.02467	2.50773	-0.00816344	-0.00841505	-1.0095	-1.45633	-3.14535	0.38738	-0.561164	-2.52902	-0.668716	-0.979465	0.580991	-2.94996	1.31599	0.861007
lib230524_AGACAAATCTTCCAGC-1	8.14793	5.12927	-0.626128	5.23729	4.73039	1.99404	8.69787	5.23746	0.215276	2.20768	-1.73571	-4.26355	1.22825	-2.29694	-0.970687	-3.54463	0.716234	0.335468	-2.148	-1.72937	-1.14317	-1.39945	-0.0371474	2.55853	-1.12381	-1.39178	1.01317	-0.482957	2.28545	1.16907	-2.28639	-1.70981	-1.50881	-2.22415	-3.0218	-1.68505	-0.173148	3.74308	0.193018	-2.32334	-2.73472	2.18159	1.80016	0.961255	-0.48672	3.50139	1.37244	5.28597	-1.98981
lib230524_AGACTCAAGAAGGGAT-1	-3.97706	-3.46659	-0.333824	2.22522	0.995784	-0.0318998	1.67004	-0.492112	2.39438	0.206813	-0.284271	-1.07555	0.507144	-0.702794	-0.370238	-0.893475	-0.0928782	0.892622	2.12795	-1.4627	-0.702009	1.66649	-0.138022	-0.200305	0.80488	-0.990843	-0.193909	-0.283639	-1.07574	-0.151335	-0.805297	0.699177	-0.483592	-0.822167	0.200178	0.177324	-0.128269	-0.67252	-0.221666	1.24372	-1.62239	0.311145	-0.701793	-1.40225	-0.0900037	0.387472	0.614749	-0.000217876	-0.552592
lib230524_AGACTCACATCTTCGC-1	-3.4168	7.78171	-2.1624	10.4844	-0.148615	0.329306	3.24042	0.314489	-1.22051	-0.897689	1.66936	1.30956	-2.10746	1.26946	-1.09976	0.858528	-1.06939	0.065344	-5.05251	0.0585707	2.84342	-0.944914	-0.522312	-1.6981	0.260101	-1.98947	-2.45714	0.357488	4.31474	-0.531961	1.17198	5.81931	2.57881	1.98404	6.82993	5.61124	-2.68351	2.08697	-1.19936	-5.44403	-1.01192	-7.55352	-3.8061	2.29589	-0.721085	5.33145	3.51747	-3.55521	-2.11861
lib230524_AGAGAATGTTCTCTAT-1	14.0023	1.0574	8.28988	3.9866	2.91223	2.75176	5.17044	2.5592	1.2221	1.5616	1.11346	0.836616	4.4806	-2.06586	-1.14735	2.63313	1.24646	1.14443	3.52871	1.83716	-2.87109	-0.26642	-0.903635	3.55502	-2.18224	0.391978	1.19465	0.327526	0.285437	0.859984	-0.530851	-0.865063	-1.96612	-0.251756	-0.317807	0.480912	1.55735	0.616039	3.13724	1.13194	-1.06545	-4.2083	0.821914	1.01626	-2.52742	-1.69249	0.729882	0.274322	-2.30419
lib230524_AGAGCAGCAGGTTTAC-1	1.13552	-4.17212	4.25252	-0.189877	-0.347075	1.54933	3.75225	-2.95715	0.541808	-0.828926	0.893958	-2.10189	1.67145	-3.14475	-1.60687	-1.31095	-1.0009	-0.641604	2.10973	2.22716	-1.05832	0.990034	-0.402521	-1.25014	-0.808795	-0.24154	0.18729	-0.521515	-0.476266	-0.382631	-0.334835	1.50291	-0.398304	-0.786932	0.225539	-1.64538	-0.911784	-0.781643	0.255261	0.748349	-0.521754	-1.31938	-0.506107	1.01238	0.760326	0.919396	0.515485	0.553713	-1.05034
lib230524_AGAGCCCAGCTACTAC-1	6.34024	-3.43699	5.27804	-2.60142	0.46774	-2.37412	-0.812114	0.422555	-0.157339	0.931701	0.875256	1.11771	0.991666	0.876995	0.696429	0.13137	-1.34792	0.893377	-1.68064	-0.409967	1.81425	-0.721995	0.468188	-1.56156	-0.364247	1.27857	2.144	1.0306	1.1885	-0.125752	-0.376963	-0.473893	-0.119458	0.403705	0.0184393	0.0580453	-0.587271	0.8863	0.762473	0.202515	0.371277	-0.292868	-1.45474	-1.47541	-0.35714	0.639073	0.361295	-0.0496964	-0.46329
lib230524_AGAGCCCCACATGGTT-1	-3.86364	-2.87469	0.400092	1.63348	-0.379035	1.73042	0.858756	-1.27007	1.51707	-0.814606	-1.86022	-0.285386	0.143802	-0.14413	1.20644	-1.01906	0.473644	-0.353743	-1.6877	-3.00826	-0.991795	-0.495229	-0.669912	0.467369	1.0301	-0.572675	0.184907	1.16019	0.00828623	-1.56372	0.843032	-0.6381	0.0138483	2.12909	1.14703	-0.730051	-0.0447087	0.196445	0.71923	-0.149556	-0.257691	0.579368	1.63042	-1.31587	-0.52863	1.80857	-0.317167	-0.241371	0.284596
lib230524_AGATAGAAGACCATAA-1	10.1082	2.11448	4.15867	2.78222	1.05967	-2.81095	1.93961	-0.209505	0.83252	1.62206	-0.732968	0.34954	-1.14678	1.57713	0.466545	-1.89524	-1.44949	-1.00528	0.0682592	1.39166	-7.2626	2.18689	-1.51635	3.78825	-1.64016	-1.00805	3.29483	-1.16102	0.668542	-0.918845	-0.375575	-2.94342	-2.91056	-1.04005	-1.96621	0.494168	-0.964707	-0.306582	-0.517659	-3.7165	-0.511303	-1.82743	-2.62236	0.6669	-0.836325	-2.66093	1.2423	1.54864	-0.577787
lib230524_AGATAGAAGCACTAAA-1	12.4496	0.57575	13.6832	2.20215	-1.75412	-8.04017	4.30896	2.90226	2.28798	2.66709	2.76721	1.94003	-1.53569	4.37073	1.7888	4.68135	-2.79786	0.261962	1.74694	-2.42224	1.01784	-0.0625611	0.491708	1.01945	2.38749	-0.848468	-0.656615	-0.553213	-2.96408	-3.33726	-2.19545	0.980215	1.85932	-4.63586	-1.05146	1.8281	4.53758	-2.09084	-2.62835	2.09218	1.48135	-0.395935	1.85865	0.171196	2.20997	-0.0651744	-1.13642	-1.18188	2.86508
lib230524_AGATAGAGTGTCATTG-1	7.67553	-2.58211	4.56566	0.596474	2.42425	2.65959	4.31337	-1.18741	2.08214	0.586428	-0.100806	-3.97468	3.24823	-2.24024	-1.48422	-1.689	-0.236522	1.48413	0.916525	-0.301821	-0.824812	-1.03235	1.18869	1.45834	-1.33071	0.164375	-0.238503	2.98308	2.80014	2.03744	-2.00487	-3.47163	-0.468591	0.0313869	1.64964	0.954644	-1.75485	-0.408281	0.609661	-0.822593	0.863824	-0.406358	-0.990978	-0.534089	1.31937	-0.969609	-0.134268	1.25133	-1.3677
lib230524_AGATGAACAACTACGT-1	2.41256	-1.19207	3.3758	1.84012	-3.57716	-0.228701	2.11587	-1.72515	-0.499997	-1.10816	2.10204	0.175028	0.784952	0.104124	-0.107868	-0.665593	-0.652027	0.358157	-1.08696	-1.49987	-0.659399	0.886194	-1.13615	0.683783	1.76897	0.612148	0.135376	1.98888	1.25782	1.64867	-0.20869	-3.15122	1.63756	3.24665	-0.450931	1.47733	-0.455973	0.947933	-1.61547	-0.110531	0.337316	-1.62088	-1.94619	1.15547	-0.2476	-2.00218	0.695612	-2.19894	-0.346836
lib230524_AGCCAATAGGTAGGCT-1	1.75243	-2.10117	8.56053	4.37944	-3.56203	-7.36886	1.58537	-2.05648	0.365487	-2.91645	0.416418	3.14971	1.57557	2.26055	-0.412548	1.06187	-1.52237	1.27746	-0.930055	-2.51303	3.9914	0.613625	0.0224966	-0.0110252	-0.541531	-0.11745	-2.98015	-1.42273	-0.867657	0.767386	-1.36263	2.03041	-0.975731	-0.570906	-0.150121	-0.984026	-0.422591	-0.775333	-0.437129	-0.446254	0.679522	0.357478	-0.211513	-0.00552687	1.49326	-0.842813	-2.95891	-0.788987	1.47146
lib230524_AGCCACGAGGATACGC-1	-0.0188074	-2.97027	-0.456384	-0.607835	-0.8972	0.542594	0.25705	-2.28181	0.949401	0.0435437	-2.49189	-0.673265	2.08516	-0.748787	-1.11631	-1.48573	-0.804474	0.553218	0.0119554	1.14352	1.36489	0.500935	0.671123	1.49757	2.4061	0.322116	0.608735	0.691659	0.734729	0.842236	0.0942513	-0.380903	0.345375	1.59993	0.893097	-0.0473167	0.259033	-1.11893	0.0781869	1.05127	-1.16941	0.443951	-2.25569	-2.54852	0.922349	0.372317	-1.54002	-0.768077	0.419659
lib230524_AGCCACGTCAGGACGA-1	5.4178	-0.891493	7.12806	7.84154	-0.903668	-0.0656249	3.23341	-0.638735	2.30044	-2.1156	0.353719	1.13233	-1.28543	-0.92625	-0.441876	1.81522	-0.616937	1.36304	3.62127	-3.01924	2.14217	2.29661	-0.132848	2.07894	2.87677	0.266463	0.658771	-3.06818	-1.31017	-1.66797	-0.895769	0.902133	1.64025	0.355976	0.0385189	-3.67778	1.53623	-3.67222	-0.0765856	0.213267	2.2988	-1.72534	-1.20745	-0.127206	-0.0232594	1.95684	4.30435	0.362456	0.656365
lib230524_AGCGCTGTCTACCTTA-1	-4.23126	-2.61731	-0.983426	2.265	-1.614	-0.299818	0.733609	-3.48716	1.01564	-2.3664	-2.29884	-0.662839	-0.371895	0.879978	-0.717136	-0.0916487	-0.293433	1.48249	0.373074	-2.03022	-1.13958	2.20414	0.392771	0.0654798	0.816415	-0.188042	-0.251135	0.123921	-1.95558	0.216396	0.737179	0.841209	-0.150002	-0.0782415	0.0520306	0.549574	0.18163	-0.175768	0.885427	0.654946	0.395153	-1.22603	1.30691	1.06861	0.0324644	-0.570126	0.0802282	-0.219052	0.914729
lib230524_AGCTACAGTAGCTGAG-1	12.1179	0.0779537	6.40812	2.54917	4.31774	0.494877	3.97386	1.66211	1.12338	2.7647	-0.728578	0.881539	1.76342	0.298158	-0.172348	0.65315	-0.452255	0.678311	0.064402	1.8003	0.659075	-0.809184	-0.252623	-0.0198478	-0.600544	0.615911	1.12036	-0.010151	0.65245	-0.20851	1.46825	1.63118	-1.39919	-1.23576	0.833321	-0.468027	2.18878	0.730187	2.24624	-0.67863	0.456125	3.41377	-2.28608	0.0264369	2.48194	2.47522	-3.26481	0.482593	0.305091
lib230524_AGCTACAGTGATTCTG-1	-4.83947	-3.66262	-0.479314	0.261899	-1.02347	-0.468731	0.501328	-2.45255	-0.135932	-0.996825	-0.230004	-1.78252	-0.265692	-0.42658	-0.201371	0.0526029	-1.15418	0.787152	1.91766	-1.94074	-3.94712	0.118174	1.58919	-0.343729	1.4189	-1.48615	0.252469	1.06799	0.000983356	-0.114369	-0.866797	0.228018	-1.14864	0.476899	-2.00666	0.298944	0.127543	0.450968	-1.35266	-1.37673	-1.04761	1.60461	0.0641151	-1.78539	0.223583	-0.386916	-0.196445	1.12934	0.087563
lib230524_AGCTCAACAAGTGGAC-1	2.63284	-0.799549	1.91554	4.11515	4.3595	2.73149	7.84697	-1.38958	2.35248	-0.279655	-0.952513	-0.81683	2.09025	-2.32244	-2.60158	-0.645577	1.08936	-0.0132715	1.64153	0.382225	1.28254	-0.82752	0.390349	-1.95968	0.548047	-1.83241	1.44596	-1.37723	0.136111	-1.0875	-3.09935	-1.06465	-1.40494	-2.67426	1.60539	-2.3747	-3.52162	-1.80466	1.06065	2.89418	0.759858	0.810245	-0.47785	-1.9288	3.05008	4.88448	0.823362	-1.23133	-0.0676179
lib230524_AGCTTCCCACATACGT-1	-1.72717	-0.56503	-0.603829	1.81549	-0.602972	-6.23651	-4.2579	-1.69685	-0.806018	-1.22772	0.503875	1.95296	1.22484	-0.327974	1.2423	-2.04843	2.32316	-3.368	-3.71787	0.395027	6.88307	1.86214	-0.0125512	-3.84874	-0.54342	-2.51967	0.630802	2.87056	0.532438	-0.123866	1.1512	-1.1783	-1.68787	1.12304	0.145995	-1.68109	-0.698837	-0.898379	-3.42102	-1.95104	0.69244	2.20097	-3.69888	0.185507	0.163028	-1.59964	0.797399	-0.764616	2.65547
lib230524_AGGAAATCACCGTACG-1	1.28023	-2.92872	1.8221	1.99072	1.23862	1.00366	4.70627	0.0689843	1.27164	0.400202	0.50132	-0.675828	1.94662	-1.86681	-2.05924	-1.0665	1.01697	0.360273	1.64759	-1.40858	-0.777644	0.985182	0.401061	-0.0252908	-1.00494	-2.89611	1.7205	-1.85697	-0.618365	-1.78545	0.253969	-0.611416	-0.912631	0.501949	1.74384	-0.7278	-0.703311	2.25066	1.54804	-1.66305	-1.91238	-2.13747	1.17365	1.4731	0.676377	0.888211	0.299459	0.923296	1.80552
lib230524_AGGACTTGTCTGTGAT-1	-1.67408	-3.76019	1.18221	1.17297	-1.17369	1.79242	1.0147	-2.37276	0.84126	-1.04881	-2.26867	-1.01764	0.308823	-0.987647	-0.545088	-2.77526	-0.503488	0.290917	-0.172305	0.0362472	-1.50426	1.80322	0.909671	1.41104	-0.871559	0.596899	0.98221	-0.594384	1.80829	0.498034	-0.11803	-0.330417	0.0726693	-0.957915	0.587526	0.234908	-1.50512	-1.37545	0.810393	1.26888	0.168396	0.904501	-1.91586	-0.104529	-1.84666	0.625706	0.532933	-0.350035	0.593076
lib230524_AGGACTTTCAATCTTC-1	3.155	-2.51901	4.94698	3.25944	1.42728	-0.48656	3.6331	-1.97111	-0.566128	0.0178676	-1.0669	0.635401	0.733049	-0.78764	0.333576	-0.0141007	0.485627	1.34202	-0.239268	0.852992	0.117106	-0.770936	-1.18905	-0.864342	-2.6825	-0.782567	1.79574	-1.46117	1.80557	-0.0654462	1.73444	1.34422	-1.98686	1.65892	1.16667	1.78217	-1.69554	-0.595431	2.10856	0.650933	-3.36504	1.30203	-0.201713	-0.601699	0.0479752	1.46666	0.772884	0.6124	-0.427601
lib230524_AGGAGGTGTATACCTG-1	-0.53942	-3.50934	0.465852	0.917557	2.61	-1.10332	2.6977	-1.81142	1.75786	-0.514302	-0.342953	-0.0922976	0.788145	-0.830982	-0.580209	-1.82232	1.18056	1.12141	2.93058	-0.887948	0.0881604	1.01364	0.657424	0.684201	0.379152	-1.96392	-0.0814407	-2.1394	-0.875915	-0.429451	-0.687203	2.44817	-2.82151	-1.20701	0.87119	-0.974889	-2.29938	1.42943	1.34246	0.234828	-2.57714	-1.20835	0.684094	-0.294214	1.18713	-0.575455	1.71885	-0.327398	0.519848
lib230524_AGGAGGTGTCTAGATC-1	5.06507	-2.43889	1.73249	-0.123955	5.75224	1.35917	3.01998	0.319248	1.79097	1.31587	-1.09644	-1.40349	1.88489	-2.40361	-1.57436	-2.09122	-0.971729	1.88142	-0.620577	0.231723	-0.368479	-0.624141	0.59164	0.444608	-1.55451	0.0504718	2.05999	-0.934974	0.468384	-0.318792	-0.708984	1.42725	-1.9319	0.81743	0.476386	-0.708974	-0.0824236	2.04543	-0.307754	-1.71324	-1.19917	1.59361	0.189824	-1.20274	-2.5811	0.543778	1.98228	0.922064	-0.167494
lib230524_AGGAGGTTCGTGAGAG-1	-1.96467	-2.72099	0.870931	0.538432	0.488774	-1.31283	2.82441	-2.37979	1.75071	-1.18786	-0.42757	-1.60087	1.3994	-1.25392	-1.49663	-1.20647	-0.049081	-1.82961	1.49883	0.4666	-0.885972	3.03284	-2.49735	1.58901	1.07573	-1.49256	0.543391	-1.78275	-1.80795	0.812016	-0.198014	3.39928	-1.21438	-0.705866	0.130931	-3.27845	-0.739694	-2.19409	0.630336	-0.723071	2.35744	-0.30095	-3.05588	1.59099	0.823592	0.395705	-1.76532	0.447573	-0.130121
lib230524_AGGATAAGTCTAACGT-1	5.91126	-2.70974	9.9276	0.946301	-2.57639	-4.33123	2.49632	-2.36066	0.887273	-1.22736	1.49447	2.26195	2.44208	2.05951	-0.347992	1.0488	-2.11663	0.805973	-0.972518	-0.342023	2.36369	-1.5586	0.201724	-0.926016	0.429983	-0.601409	0.61577	0.676873	-0.891448	1.49942	0.537145	-0.686585	-1.35887	1.01329	0.227868	0.101942	-0.388633	-1.71573	-1.0061	0.221236	1.62836	0.492804	-1.01924	0.257178	0.379165	0.774222	0.609814	0.017165	0.101871
lib230524_AGGATCTGTATGAGAT-1	0.347847	-3.57559	1.48079	0.785566	2.90639	0.135633	2.36236	-0.754464	2.93232	-1.23836	0.391346	-0.569911	0.842148	-3.24081	-1.73571	-1.98307	1.5958	1.89871	0.401046	-1.79812	-0.762453	-0.466331	0.993732	0.702125	0.334392	-1.73143	3.16079	-0.907731	-0.423014	-0.186686	1.08652	0.143079	-1.57903	1.47128	-0.689307	-2.1235	-1.28714	-0.306328	-0.115259	0.578831	-2.22674	-2.1655	0.275096	-1.04237	1.19732	0.48923	1.12623	0.614119	0.64435
lib230524_AGGCATTGTCCGTTTC-1	6.25089	-1.06149	1.40483	0.99053	1.35437	3.56764	5.45984	-1.53767	0.075761	-0.699165	-0.445854	-1.19836	1.00503	-3.14491	-1.60271	-1.09848	0.179273	-0.117812	3.72678	-1.81419	-2.21741	1.97882	2.15996	-0.522797	1.42065	-0.308024	-0.494195	-0.457919	-0.693792	-0.288608	-1.60664	-0.534081	-0.611208	-0.400608	1.30181	-0.739133	-3.33122	-0.444249	1.14166	-0.235136	0.611773	-0.974091	2.30173	0.711144	2.60968	0.107642	1.02497	0.996693	0.349116
lib230524_AGGCATTTCACTACGA-1	2.72192	-0.809551	3.03742	1.53852	-1.28045	3.51047	5.13443	-3.5017	1.20897	-1.50006	0.349414	-3.15926	2.46748	-1.74467	0.32649	-2.69612	-3.79326	-2.82477	5.65128	-1.19045	-0.84703	3.93897	-2.55317	-1.32701	-0.748141	-1.11336	-4.44124	2.51904	-1.35316	0.95162	-3.75791	-3.53849	-0.370872	-0.644728	2.03307	-1.31576	-2.91528	-4.97304	-1.71357	0.0602529	-1.50011	-1.40834	3.84935	-3.15446	1.46928	-0.104865	-1.3035	-1.37404	-0.303176
lib230524_AGGCATTTCGGCATCG-1	3.77624	-1.95405	10.6426	2.20122	-5.69481	-10.4888	1.66812	-3.12965	0.666174	-2.90505	2.78523	4.01255	0.713478	4.56153	-1.02443	1.44382	-1.25073	-0.0358649	-4.36076	-1.03664	2.9447	2.01651	0.913078	-3.25567	-0.869254	1.82542	-1.71141	-0.865622	-2.31799	-2.05711	0.502318	3.01064	0.0706022	1.53802	-2.92794	0.252824	-1.23535	-0.487149	1.8143	-1.66851	-0.291766	0.635157	-0.704853	1.40388	1.64082	-0.628309	-0.79228	1.70018	-0.933537
lib230524_AGGCCACGTTGGAGAC-1	2.48797	-1.57038	1.92932	1.29546	2.9054	-0.0891855	4.08102	0.346578	1.34505	2.03415	-1.01239	0.591195	0.618766	-0.939701	0.127866	-0.260571	-0.112248	-0.40421	2.36428	-1.72519	-1.83817	1.74604	0.746206	-0.816799	-0.474787	-2.17137	1.30093	-0.444127	0.518139	1.81209	-0.516169	-0.135191	-1.00447	0.465833	1.96814	-0.695831	-1.46418	1.05086	0.25556	0.0164859	-1.0396	0.272907	1.57178	-2.03219	-0.477528	-0.511524	0.91149	0.717851	0.455983
lib230524_AGGCCACTCTGCGTCT-1	6.51957	-3.45321	8.71003	2.48906	-2.10648	-1.66332	0.552052	0.46575	0.0219922	0.0301843	-0.715046	0.73775	3.14034	-0.664046	-0.712851	-1.68273	1.15618	2.34771	-1.66584	-1.78472	1.53092	-0.915799	0.600819	0.244631	1.39281	0.617496	-0.12647	2.35335	2.47338	1.53013	4.71914	-0.795202	-1.51882	1.72296	1.1278	2.10045	-0.194246	1.79637	-0.00929829	-0.00106165	1.89366	2.87867	-3.66612	-0.984613	3.39822	2.71162	1.46983	-0.944524	-0.268302
lib230524_AGGCTGCCACTGGCCA-1	-4.59493	-2.81275	0.0537398	3.27	0.311364	0.794942	0.568842	-2.08405	1.48685	-1.34662	-1.91042	-0.23962	0.0616028	-0.0786875	0.481028	-0.592494	-0.0557593	0.429613	-0.903591	0.218627	-0.395204	-0.486283	-0.454847	-0.197284	0.578885	-0.4492	0.524544	0.487491	-0.417044	0.325667	-0.432266	-0.872758	0.448698	1.44434	0.989044	1.20442	-0.0320385	-0.0103305	0.722813	1.49676	0.0471932	1.51328	1.0783	0.182019	0.10631	1.10114	0.691643	1.10387	1.56825
lib230524_AGGCTGCGTTGGCCTG-1	6.20288	0.139782	1.90733	1.52253	3.30328	-0.327201	3.45627	1.36425	2.75672	0.769219	-0.858712	-1.16672	0.727341	-1.66385	0.193616	0.015022	-1.58269	-0.945267	2.14475	-2.07766	-4.41908	2.12146	0.936622	-1.29355	-0.337763	0.886376	-1.18225	0.748547	0.260648	1.01034	-2.16332	-2.17214	-1.63003	0.876211	-0.671737	0.474466	0.269903	-1.03217	-1.44845	-0.612412	-1.17436	-2.44458	3.58634	-0.150312	2.66049	-2.20899	0.564552	-3.99011	-0.620759
lib230524_AGGGAGTAGCCGTTAT-1	-1.29191	-3.60849	3.22837	0.159388	-2.84133	-1.2828	0.522805	-3.05629	-1.77776	-2.4826	-0.0552643	0.0709635	1.38661	-0.399243	-0.30444	-1.4442	0.0572659	-0.0826395	-0.237607	0.165524	0.0443206	0.0359517	-0.0404851	-1.81166	-0.612609	-0.497478	0.606102	0.779292	-0.0385401	0.672575	1.2908	-1.7166	-0.424137	0.976876	-0.68791	0.629447	-1.25751	-0.240864	-2.02494	0.550129	-0.309944	-1.10979	-0.730409	-1.15654	-1.92085	-0.182559	0.691135	-0.529685	-0.109342
lib230524_AGGGCCTAGTAGCTCT-1	0.923935	6.60657	-5.76008	0.334958	-4.87324	-5.22137	-3.24215	-5.32004	-2.04842	5.64573	-0.833866	-4.8169	-0.618651	3.19596	0.82119	-6.20122	-1.58623	-6.92907	-0.00592116	0.803309	0.815906	8.89596	2.41619	-0.929082	0.279854	-3.29675	1.131	-5.03785	-4.45315	-0.875138	1.46024	-1.3897	0.952359	-0.594983	1.80137	1.73146	-0.311038	4.27376	-1.48528	6.86261	-2.27252	1.73529	3.79496	6.30869	8.75375	-2.90037	0.870519	-2.87357	8.15687
lib230524_AGGGTCCGTAGGAGTC-1	9.52042	0.114343	10.0799	5.9735	-1.12355	-2.5894	-0.351718	0.0792352	2.1713	-0.523237	-1.33175	0.597415	2.9777	1.07236	-1.08711	-1.0122	1.85861	-0.543797	-0.721328	-3.18813	1.65775	0.253671	0.659399	2.3623	-1.72872	0.627166	2.35509	1.73083	-0.221289	-0.891922	1.80997	-4.04735	-0.834285	-1.45243	0.785221	0.450895	2.46703	2.65074	-1.22282	-1.27807	7.48922	2.72899	-7.10076	-4.48542	2.64698	2.24715	0.671866	-0.371318	2.18239
lib230524_AGGGTTTCATCTCGTC-1	4.81756	-1.15901	4.54853	3.83015	2.11332	-0.877982	3.4627	-0.546877	0.0196814	1.31288	-1.18705	1.84537	0.32438	-1.9529	-0.527521	-0.516809	1.4061	-0.610671	-0.878555	2.67484	-1.53419	1.65256	-2.3667	4.81748	-0.705667	-0.113251	2.08693	-2.57388	0.147202	0.155205	3.62429	2.5945	3.25281	1.30913	-1.9526	-0.37088	2.36968	-1.56298	-1.32511	0.258991	-0.406897	-0.262985	-0.00587354	0.299655	-0.570634	-0.0188286	-0.585158	-1.63354	-1.99597
lib230524_AGGGTTTGTATGGTTC-1	5.97571	-1.73823	3.81099	-1.51686	0.809739	1.17981	3.79481	-0.731099	2.42585	0.583264	-0.763202	-2.11131	2.78777	-0.121618	-0.985136	-0.96529	0.30348	0.59901	-1.718	-1.06315	-3.17528	0.0650327	-1.13333	1.69419	0.0470136	-0.259324	-0.705709	2.86152	1.56457	0.0303482	0.987827	-3.35309	-0.325623	1.11514	-0.877969	0.370239	0.246999	2.44408	0.498279	-1.92291	-0.337175	0.662515	-0.920652	-1.90074	-0.906299	-3.57476	0.975417	2.8242	-0.0836269
lib230524_AGGTCATAGCTTCTAG-1	3.6104	-2.39513	2.23165	0.168991	5.22027	0.862188	4.18736	0.324821	3.40267	1.49573	0.557892	-1.21413	2.83957	-2.62646	-2.10939	-3.41733	0.0922521	1.9375	0.491568	0.187832	-0.953736	-0.372862	-1.68246	2.70808	-2.25968	0.960749	2.73365	-2.32258	0.936115	-0.552593	0.75376	2.50422	-1.98384	-0.867449	-0.558911	-1.60429	-0.336807	0.39638	-2.35573	-2.29972	-2.53947	0.872874	-0.690223	-2.04791	-0.426872	-0.488977	-0.356022	-0.711528	0.302711
lib230524_AGGTCATAGGTTCACT-1	13.2727	0.139507	15.2772	0.712148	-2.97915	-8.45597	4.8548	1.32187	2.73327	3.12466	4.14316	1.90895	-1.32519	4.5797	0.842103	6.02271	-0.306728	-0.921829	1.05258	-0.613748	-0.585231	-0.938394	0.979063	0.845978	1.18132	0.000771861	0.0127003	-1.11224	-3.66854	-2.45851	-1.48566	0.858702	2.88646	-4.8577	-0.405348	-1.38663	4.39398	-2.42202	-3.01898	0.497869	1.09999	0.447938	4.46144	1.0611	5.07727	-0.113219	0.355169	-2.27077	2.76218
lib230524_AGGTCTAAGGGCTAAC-1	-4.23909	-2.34161	-0.635874	0.320276	1.93543	-1.12264	1.70885	-2.02521	2.62813	0.226401	-1.03941	-0.428337	0.626772	0.467288	-0.0196723	-1.59167	-0.530725	0.422786	1.40155	-3.17529	0.779055	0.273836	-1.11437	0.42326	0.993515	1.28871	1.08398	0.362026	-0.372626	1.35846	-0.131895	2.23895	0.588135	0.238868	-0.634972	-1.73579	0.640407	-0.136503	1.13331	-0.156916	0.198884	-1.2542	1.75049	-2.14726	-1.07931	0.253471	3.14723	-0.340548	-0.842851
lib230524_AGGTGTTGTTCGGACC-1	-0.264549	-3.34983	1.94086	-1.95719	1.71364	-2.28784	1.64752	-3.64969	-2.12184	-0.350196	-0.580379	-0.373757	1.13057	-0.563961	-0.527208	-3.82775	-0.78497	0.0400589	1.76379	-0.523046	-0.981617	-1.29445	-0.94727	-1.06309	-0.0065693	-1.5661	1.35654	0.951732	1.39348	-1.11561	2.49665	1.1694	-0.409505	-1.66005	-2.42608	0.0268185	0.671071	1.48996	0.299328	-0.128046	-0.740043	-1.27787	-0.597209	1.19314	0.156741	-0.116438	0.0391659	-1.13777	0.792924
lib230524_AGGTGTTTCGTTCTGC-1	3.32453	-1.94592	3.84689	1.98092	-1.07403	-0.890109	5.16796	-2.22008	1.85901	-1.02474	1.58497	-0.306789	0.71253	-0.24621	-1.42649	1.10313	0.815507	-1.03551	1.98837	0.623907	-1.58734	0.731247	-0.25103	0.464749	-0.076389	-1.17213	0.56499	-1.52528	1.73062	-0.0356169	0.506261	1.87719	-0.922998	-1.0286	0.699512	-0.421355	-1.2644	-0.763154	-2.05085	3.9856	-1.71611	2.65952	0.21406	-0.61854	0.687718	0.159284	-1.85555	-3.15434	0.646082
lib230524_AGGTTACTCCGCAGTG-1	-12.6212	8.27575	6.30109	-2.89553	-0.902566	-1.85162	0.468136	-1.50607	0.603808	-1.18241	-2.04641	-0.993233	-0.0151413	-1.08621	5.14895	1.50476	-0.938819	-1.82708	4.02542	-4.35766	1.26505	2.16882	-2.34855	1.45135	-1.13394	1.13341	-0.731859	-0.344836	-0.161589	0.0632435	2.42256	-0.422905	-0.023872	0.431007	1.00384	0.414057	2.47742	-1.40136	-0.254029	-3.72739	-1.18255	-2.1075	1.33418	0.483387	-0.00380781	-0.549614	-0.0502161	1.27942	0.753411
lib230524_AGTACCAAGAGGTTAT-1	-0.234917	-3.32217	1.19144	-0.93383	0.946969	-2.8893	1.50734	-1.2216	-0.687926	0.410724	0.644702	-1.29952	0.857979	-2.07604	-0.185328	-1.31854	0.451919	-0.874544	-0.103378	0.660239	0.851203	0.0836821	-0.591212	-0.725789	-0.359819	-0.88372	0.828256	0.356666	-0.297715	1.57759	0.509341	0.881882	1.49206	0.749734	-1.00458	0.589098	0.46084	0.216635	-1.10448	-0.775995	-0.0414093	0.501254	-0.345082	0.677046	-0.00641134	0.785867	-0.308085	0.70382	0.705952
lib230524_AGTACCAAGGTGCCAA-1	0.146734	-1.974	2.54913	2.12319	-1.2646	-0.782014	2.08856	-2.10932	-0.248731	-0.906194	-1.24152	-1.10744	1.34875	-0.831119	-0.00781703	-0.686246	0.204848	0.12083	2.73808	-1.73252	-0.73134	0.328661	1.98214	-1.98301	0.158508	0.169146	-0.764684	-0.0570364	-0.698813	-1.70844	1.32665	-0.949842	1.61782	0.669366	2.50262	-1.09376	-0.288141	0.0562107	-0.209805	0.552686	0.0415912	1.91229	0.605543	0.866057	-0.834294	-0.932815	-1.58399	-1.09766	1.14911
lib230524_AGTACCACACTGTTCC-1	2.90857	-0.241637	0.0198797	1.53694	-2.89815	1.3858	3.0446	-2.36961	2.18507	-3.00523	-0.588052	-4.60235	-0.731238	-2.97225	-0.742967	-0.180756	-2.42541	-2.99819	2.02008	0.714457	0.014695	1.92206	3.3507	3.09496	-2.09025	-2.47132	0.28665	-1.24859	-7.42217	2.47051	-5.86217	-1.35141	3.2075	-3.26653	4.66592	0.573667	-6.14616	1.38408	-1.61332	-0.49044	0.163252	-0.292387	-3.6282	2.485	-0.529873	0.88087	-0.504238	-1.98878	-0.470424
lib230524_AGTACCACATAGGAGC-1	12.6307	-1.41447	6.87714	-0.117216	1.96877	-0.0754391	5.22878	1.09157	1.96649	3.01165	0.533631	-0.474761	4.56172	-0.853953	-1.62129	2.48225	0.349226	0.446298	2.21538	2.89438	-1.90162	-1.19202	-2.56117	0.974889	1.34204	-0.366058	1.59793	-2.15702	1.2721	-2.78716	1.72007	1.90499	-1.58628	-1.82105	2.74212	-3.41663	2.75898	-1.20394	0.487837	2.04999	-2.87951	-0.528923	-0.307131	1.82444	0.0326619	1.27448	-0.274056	-1.0803	-1.6063
lib230524_AGTACTGTCGGAGTGA-1	-2.4534	-3.47991	0.71249	-0.68369	0.617553	-1.02796	1.62868	-1.28354	1.69345	-0.408405	-0.0174661	-1.33041	1.14071	0.2165	-0.310657	-0.30348	-0.0564134	0.675222	1.42339	-1.15757	-0.623761	0.497224	-0.0434758	0.397129	0.257808	-0.109955	0.372763	1.21422	-0.716896	-0.810339	0.0760955	-0.179861	-0.316028	0.258236	-0.172156	-2.42753	1.06133	-0.0440545	2.19753	-0.176149	-1.45502	0.739041	0.120949	-1.58055	0.565215	0.099129	0.638249	0.583418	-0.404081
lib230524_AGTAGCTTCTCATAGG-1	8.51219	-2.81869	8.94883	0.811776	-0.307115	3.44291	5.01409	0.164107	0.669531	0.749081	0.82171	-0.776947	3.17194	-1.92173	-1.4799	0.27531	1.00817	-0.552049	1.31662	2.05233	-1.97474	-2.24663	-0.971947	0.0429119	0.801948	0.342673	3.41524	-0.548688	-0.196206	-3.75282	2.77191	-1.40181	0.433386	1.53041	0.122747	-0.971005	1.94754	1.98768	1.01773	0.163581	1.9248	0.355668	1.60735	0.866793	0.326824	1.93782	0.52526	0.0297556	1.40772
lib230524_AGTAGCTTCTGAACGT-1	4.97299	-2.10451	6.82901	2.96355	-0.205347	2.64464	3.10715	-1.39325	-0.547244	-0.244131	-2.12678	1.14342	0.981539	-2.5712	-2.01559	1.05872	0.915454	-0.693917	2.13162	1.04011	-1.51274	-2.18733	0.343341	1.21996	-1.30916	-0.185464	0.780109	2.33621	2.88154	-0.819582	2.29021	1.45835	-0.356	0.203609	-0.592523	-1.11332	0.922587	1.68986	0.565931	3.45461	-2.58004	-0.919763	-0.179805	0.897397	-1.82819	-1.32917	1.4628	1.94543	0.388475
lib230524_AGTAGTCCATATACCG-1	3.72345	-1.93207	2.67049	1.427	1.40356	0.268491	2.46833	-0.0634866	1.67211	0.285722	-1.06906	-1.65035	0.174671	-0.470117	-0.402158	-0.42356	0.447037	-1.5244	0.700342	-1.06135	-1.96646	1.53481	1.82224	-1.75736	-0.903735	0.972551	-0.486674	-1.34659	0.728973	-0.266499	-1.07095	-0.130764	-0.323335	0.904723	0.615746	-0.612765	-3.23928	-1.19767	-1.71837	-0.105417	-0.304989	-2.46842	2.81032	1.25873	1.58541	-1.46882	0.0264291	-1.65221	0.0413889
lib230524_AGTCAACAGCCGGAAT-1	-14.0291	11.0784	7.89259	-4.91176	2.18708	0.568121	-1.06856	-3.28628	2.59264	-2.03212	-0.854798	0.412113	2.00688	-2.28704	3.19523	1.62551	-0.788273	-1.78154	1.47145	-2.80838	1.32572	1.3606	-0.87351	-0.322438	-0.617495	1.24119	-1.08159	-0.837292	-0.162021	-0.238943	3.26103	0.176314	-0.250459	0.314836	0.498463	2.29631	-0.602311	1.04125	1.08883	-0.842285	0.458486	-1.60765	4.17724	-0.960769	0.879356	0.229717	-0.496826	1.26433	1.24766
lib230524_AGTCACACAAGCTGCC-1	2.93526	-0.646916	9.47601	4.47653	-4.63052	-10.1039	1.58327	-4.72964	0.0147643	-1.11436	4.01423	4.33591	2.0868	3.25761	-0.553788	4.0939	-2.18521	-0.315107	-4.41761	-1.8207	1.95735	-1.16185	0.787997	-1.90996	-0.923909	1.90586	-0.960826	-1.11293	-0.610448	2.11675	-0.283885	0.482087	-1.3296	-0.0821803	-0.732569	-2.03915	-0.934749	-0.83265	0.00513017	-5.83105	1.26462	-0.601831	1.1467	1.34918	0.728262	-0.317751	2.14444	0.560763	-0.866708
lib230524_AGTCTCCGTAATGATG-1	1.83114	-2.43614	2.09759	2.33496	-0.0495431	3.59943	2.16306	-1.76438	0.499174	-1.62685	-0.676818	-1.14686	2.673	-0.794713	-2.15844	-0.404068	1.27183	-1.53598	-2.7776	1.59536	1.86498	-1.91081	-0.925735	-0.622576	-1.67989	-1.60358	-0.305184	-0.905194	-0.300082	-0.175065	2.54167	-2.63119	1.00154	2.43901	0.586879	2.38481	-1.19138	2.08755	1.13884	-3.22026	1.10844	0.523244	-1.29417	-1.12378	-2.53448	-0.0213018	1.62554	-0.796898	-0.560637
lib230524_AGTCTCCGTCACTCTC-1	-1.23769	-2.64807	2.72012	1.81849	-2.12521	-0.200166	0.81876	-2.52018	0.389441	2.24096	-0.583862	-1.31121	0.854435	1.18179	0.460014	1.25413	0.362887	-2.09828	0.92292	0.381081	-1.20877	-0.67168	-0.187036	-0.810877	-1.33507	-0.534912	-1.52011	-1.10731	-0.236205	-0.839902	1.50896	0.701683	1.68865	0.949832	-0.071696	1.49158	1.13869	-0.9054	2.44354	-1.30676	1.19231	1.23353	-1.2363	-0.569191	-1.64676	-1.04477	0.0862887	2.13097	0.266966
lib230524_AGTCTCCTCGGATACT-1	1.59102	-2.24396	2.62457	1.80882	1.52957	-2.33717	1.46395	-1.56864	0.922567	1.67124	-0.560891	-1.67008	0.247072	-0.166533	-0.0845517	-1.63077	0.390989	-1.11641	2.03645	-0.950539	-0.0377737	0.267863	1.13847	-1.23453	-1.16395	-1.43288	-1.41957	-1.63012	-1.42826	0.544285	-0.144693	-0.18201	1.82207	0.17696	3.29477	-1.12735	-1.12699	1.69331	-0.023789	-0.965541	-0.0520723	-0.534448	1.5551	-1.04315	0.25735	-1.16733	-0.0721111	-0.59457	0.635816
lib230524_AGTGACTTCTGAATCG-1	-12.2183	8.23245	5.77017	-4.56129	-1.45872	-2.60506	-0.413673	-1.90401	-0.493718	-0.34438	-2.48764	-1.52468	-0.0646336	-1.917	1.91844	0.208367	-1.15732	-1.76603	2.0354	-3.85231	0.886968	-1.27999	-0.847304	0.903912	0.163047	2.13584	-0.661442	-0.670046	-0.558979	0.409834	1.78488	0.113762	-0.473218	-0.947201	-3.15285	0.145513	-2.61391	-1.24741	0.00400965	0.0971195	-0.146507	-2.13005	1.27332	-0.547316	-2.07584	2.18098	-1.07587	-1.46618	0.621642
lib230524_AGTGTTGCACAAAGTA-1	2.20506	1.58889	0.415945	3.02514	1.28336	-3.523	2.1374	-0.238973	0.960531	1.99477	0.507122	3.19509	-1.13652	2.47314	0.321683	1.59404	-0.73647	-2.79205	-2.39781	-1.62013	-1.65745	-2.04011	-0.114316	-3.32896	0.209932	-0.0935417	0.753644	0.203764	0.0939417	2.00381	0.135399	-1.87954	-1.02735	0.0747208	-2.53399	0.038537	0.560508	1.96477	-1.98892	1.68775	-2.67784	-0.310941	1.34897	0.619714	-0.712502	0.805813	-1.09835	0.983309	-1.03601
lib230524_AGTTAGCCAATTTCTC-1	-3.84182	-3.83704	-0.643049	1.38569	1.77102	-1.28828	2.37413	-2.08785	1.75435	-0.759365	-2.36293	-1.77146	-0.00758933	-1.86645	0.0588798	-1.50364	-1.19818	0.00418726	-0.0616529	-1.33537	-1.2272	0.19143	-0.769608	-0.202091	0.591421	-1.36574	-0.0471545	1.09271	2.88341	0.707577	0.22266	1.11869	-0.881552	0.0330546	-1.84812	-2.61185	0.360874	-0.0594533	0.248722	0.626495	-1.53945	0.186782	1.93713	-0.784603	-0.411573	0.804129	0.5878	1.35137	1.85582
lib230524_ATACCTTAGTTACGGG-1	5.01762	-2.81223	3.55087	0.54781	-0.570305	0.148777	0.215281	-1.57584	-0.0482468	0.903715	-1.51494	-0.829405	1.63507	-1.30788	-0.832498	0.000977527	1.74605	1.5887	-0.0364117	-0.108018	0.00178608	-0.27694	1.00343	-0.703413	-0.822474	-1.38978	2.82973	1.1235	2.35942	1.70719	0.952588	-1.97001	0.51028	-0.0954353	-0.850773	4.32707	-0.482927	3.24813	0.225076	0.404957	0.933504	2.19601	-2.17094	-0.861499	-2.79473	-0.225471	0.459506	0.493197	-0.152881
lib230524_ATACTTCTCTCGTCAC-1	5.79529	-0.326548	0.733866	1.79575	3.76847	1.53288	4.3594	1.13769	1.3689	-0.0386972	1.5221	-0.313467	1.91383	-2.82602	-1.38841	0.0196039	-0.260123	0.0568182	1.78714	-1.61015	-2.01088	-0.0638134	-0.457611	-0.373555	1.30254	0.619834	0.0955551	1.15267	0.359731	0.28106	-1.66529	-1.65247	1.54878	-0.287661	-1.04503	-0.216779	-1.68693	0.618528	-0.91491	-0.998743	-1.51246	-1.1497	0.740886	-0.106087	1.2591	0.328566	0.602234	-0.458754	-0.775703
lib230524_ATCACTTTCCTTACCG-1	-4.09714	-0.24011	-2.17037	1.54746	-0.170937	-2.54781	-1.20102	-1.95498	0.921132	1.94243	-0.544192	-0.191021	-0.703156	1.99812	1.15894	-0.872241	-1.80785	-1.92057	0.690473	1.18586	-1.29329	-0.13253	-0.376445	1.71311	0.86423	-1.78183	0.720308	0.273891	1.54925	1.32473	0.334818	0.341632	-0.293897	0.860333	1.00205	-0.605513	0.789717	1.75166	0.0429033	3.10446	-0.979364	0.101286	0.21984	-0.534281	0.565208	-2.38085	-0.639628	-1.2866	-0.999457
lib230524_ATCAGGTAGATGCTTC-1	-1.36169	-3.52934	3.3171	0.954247	-3.5838	-0.300859	-0.151544	-1.30319	-0.524152	-2.19359	1.04981	-0.322276	-0.0491824	0.489403	0.327799	-2.06741	0.134508	0.192168	-0.459111	0.704619	-0.106341	0.0907081	0.195547	-0.30785	-0.595988	-0.604042	1.01894	0.769486	0.383887	0.480921	0.588432	-0.235	-0.682975	-1.12196	-0.266971	-0.293757	-0.267047	0.261073	-2.16339	0.326708	1.41425	-0.497386	-1.33448	-0.531371	-0.203161	0.635311	-0.0668373	-1.6394	1.24036
lib230524_ATCAGGTGTTTGGAGG-1	-7.21376	-3.43476	-0.394461	-0.160978	-0.737911	-0.203965	0.641672	-2.11878	0.630975	-1.05146	-1.93211	-0.627922	0.831069	0.173074	-0.139606	-0.596445	-0.691127	0.380951	0.877852	-0.396626	-2.20854	0.301992	0.738275	-0.954066	0.846043	-0.105777	-0.374954	0.349475	-0.137205	0.0863634	-0.979402	-0.64812	-0.6227	0.128102	-0.482843	-0.232536	-0.463472	-0.723147	0.288852	0.664596	0.350236	0.494847	0.696326	-1.03309	0.00693335	-0.768155	-1.59707	-0.0590466	-0.544094
lib230524_ATCATTCCAACGCATT-1	6.38605	-1.95161	5.49685	1.34662	1.53347	0.515862	4.18155	0.291373	1.39644	1.77877	0.298709	-0.107064	2.15338	-1.06538	-1.44704	0.484479	0.0904463	-2.13274	0.550726	2.81045	-1.56752	-0.732779	-0.324607	1.38508	0.721513	0.372902	-0.846662	0.743877	2.89096	-2.64047	0.881539	0.491784	-1.24052	-0.0595282	0.701643	-1.03455	1.50113	-1.39815	0.4398	-0.526901	1.03102	0.988509	0.849503	-0.9314	1.25683	2.05248	-1.65553	-1.58097	1.04224
lib230524_ATCATTCGTTGCCGAC-1	11.0739	0.674994	2.33373	3.11267	6.76412	3.0339	5.10034	-0.106493	1.97897	2.34236	-0.540216	-1.76223	1.90913	-1.8709	-1.12172	-2.27517	-0.570599	2.21096	1.60179	-0.818081	-0.787288	-0.59467	-0.38243	1.04579	0.0485797	2.26742	1.34599	1.90191	2.39844	2.582	-0.715453	-1.12053	-1.22809	-0.841524	-0.287673	0.398362	0.752716	3.57817	0.472128	-0.693562	-0.908516	0.614283	0.141545	0.193429	-1.6586	0.989659	3.2559	3.82438	0.0437488
lib230524_ATCCACCCATGTAACC-1	4.9558	-2.3365	5.80021	2.35205	0.4323	0.452909	3.55372	1.1315	2.28371	2.20349	-0.201764	-1.3119	1.52627	-1.37225	-1.86001	1.12827	1.05149	0.0965545	1.65374	2.56716	-3.37343	-2.16654	0.557868	2.28475	-0.9646	-0.484651	1.48622	-0.210249	2.08644	-2.01712	0.199613	1.23741	-0.851917	-0.266949	0.101779	-0.119522	0.103759	-0.690624	-0.869415	0.77812	1.92539	0.689537	-0.763026	-0.399963	1.97096	1.49667	1.39084	-1.44585	-0.292899
lib230524_ATCCACCTCCATTTGT-1	1.6623	-1.83397	-0.621688	2.10096	2.49483	1.29279	2.55234	-1.12117	1.50002	0.320563	-1.89445	-1.86645	2.48524	-0.770589	-1.23362	-1.70046	-1.8279	1.90432	0.348874	-0.0504528	1.99851	2.77844	0.526229	1.1775	-2.29311	-0.655105	-1.64074	-0.877596	-0.652855	2.08835	-1.59226	0.802523	1.43761	-2.64314	-0.765478	-0.369892	-2.51899	-0.626866	-1.55727	-2.49088	0.363827	-1.08452	0.577232	0.470467	0.551144	-0.248098	-0.719739	-2.30632	-1.64544
lib230524_ATCCATTTCGTGGGTC-1	11.4384	2.65054	1.69164	5.42345	6.61375	6.26634	5.82239	0.39404	-0.0638307	2.5932	0.335526	-1.83156	1.45858	-0.475942	-0.496618	-3.16427	-1.75324	2.4854	2.24038	-1.42616	1.45513	-3.36662	0.271579	1.15188	1.48848	-1.3971	2.182	-0.756657	1.22879	2.33424	-1.57734	-2.72858	-1.33008	0.0599311	0.0496845	0.763295	0.196209	2.35381	2.40348	-1.67548	-2.65308	0.945805	-0.989718	-0.622594	-0.553894	0.484917	2.47846	1.97574	1.07885
lib230524_ATCCATTTCTCCGCAT-1	2.28046	-3.41523	7.03585	1.54603	-3.3733	-5.31029	0.307251	-3.75705	-0.987414	-1.38579	-0.284577	1.68406	0.155344	4.6262	0.349059	1.27408	-0.541976	1.61869	-2.88838	0.310325	2.43147	0.956875	0.672018	-1.16374	-0.769252	-0.421011	-0.538366	-1.00702	-1.7626	0.0400153	0.353756	0.663244	-1.06454	-0.882757	-1.86301	0.179902	-0.437663	-0.576596	-1.26035	-1.49607	-1.66888	-2.65322	-0.671988	-0.74892	1.51059	0.172798	-0.791535	0.804291	-2.6078
lib230524_ATCCCTGAGCCTCTCT-1	1.11976	-3.8116	6.85036	0.612541	-4.86794	-4.20107	0.148416	-3.32958	0.484807	-2.13189	2.21978	2.93664	1.50575	3.85871	0.358703	0.768266	-1.62859	-0.516313	-3.35424	-0.881605	2.6548	1.67407	0.078696	-2.29465	0.31014	0.182074	-0.661642	0.107903	-0.109975	1.15847	0.869476	-0.122116	-0.0254914	1.72545	-0.150537	0.173275	-2.26275	2.00057	1.10278	0.403787	0.053822	0.632443	-1.27631	-0.193304	-0.406171	-0.847909	-0.350483	1.2987	0.400427
lib230524_ATCCCTGAGCGTGTCC-1	6.50833	-1.66853	3.32429	-0.392645	0.782142	-1.53036	2.39852	-0.0452596	1.28707	0.800425	-2.66678	-0.370514	1.69261	-1.13468	-0.957999	-1.01711	0.548747	-0.642195	-0.878524	0.537847	-1.77472	-0.843167	-1.09208	1.42673	0.124918	-0.30657	-2.91658	4.89137	1.29252	0.842078	-1.52108	-6.77923	-1.13302	-0.858714	-1.43651	2.03071	1.6013	1.54113	0.593889	-1.24666	1.78703	1.10382	0.478112	-0.142605	-3.49349	-4.91276	-3.00102	2.5082	0.882203
lib230524_ATCCCTGCACACAGCC-1	6.72592	-3.17244	6.66759	0.298086	0.581387	0.995257	2.4748	-0.109309	0.914928	1.6488	0.010182	0.411511	0.972966	-2.82289	-1.98581	0.824215	0.294801	-0.640116	-3.5134	2.74219	0.16483	-1.52098	-2.41012	0.268885	-3.38143	0.887399	0.758806	1.712	0.439426	1.53188	1.43245	-1.20638	1.1529	3.86375	1.21825	-0.00352246	-2.65074	0.109308	1.11936	-4.14679	-0.833106	-0.18883	2.1214	-1.70139	-1.3978	-0.441576	0.235649	-1.62324	-0.848766
lib230524_ATCCCTGTCAAATGCC-1	10.3009	-2.01702	6.03584	0.796355	2.91441	5.66181	4.04012	-0.938506	-1.08375	0.782544	1.92507	-1.30579	0.746928	-4.80636	-1.21015	-0.0208109	-0.0453366	-1.55387	1.18404	2.34577	-0.607268	0.446087	-1.08521	1.45806	-1.04043	0.939552	2.06223	-1.80018	1.23678	1.73843	1.62965	2.27145	-0.159346	3.14852	-2.22863	-1.70644	-0.0284125	1.81852	2.25944	1.25366	0.928552	-0.455566	0.659323	0.890928	0.179777	0.663803	-0.674768	1.01357	-0.691485
lib230524_ATCCCTGTCCGTGTAA-1	4.38492	5.05166	-2.39729	-2.21626	-3.10932	-7.56022	-2.98099	-2.2788	1.39126	0.618383	1.0212	-1.43171	0.163547	2.49999	3.1924	-4.93123	1.36012	-4.60037	0.292539	0.0556671	1.24741	5.29578	1.91233	-1.57033	1.27542	-4.68758	2.19082	4.24701	-0.380466	-0.00221141	-3.774	-1.77786	0.330167	0.640418	-0.531339	-1.79681	-2.00506	3.43546	-2.27169	-0.608032	-1.84744	-1.32138	-0.564731	2.03487	1.71776	-0.362575	4.59838	-3.54056	-1.77836
lib230524_ATCCTATCAGAACTTC-1	3.75989	-1.49857	9.13545	1.43044	-4.45799	-7.87878	2.40112	-3.45714	0.774327	-2.80003	2.46578	2.55262	0.368357	4.73362	0.995253	0.960257	-1.60507	-2.26774	-1.13261	-1.23668	1.26467	1.22814	-1.1053	-2.21208	0.033264	-0.191684	-1.24615	-0.630083	-1.26355	0.951767	-0.452018	0.848223	0.223537	-0.928977	1.19617	1.6115	-0.137753	0.333269	2.96607	-0.265133	-1.07281	0.732655	-0.781633	-0.770694	0.300043	-0.320457	-1.62448	-0.820883	1.78676
lib230524_ATCCTATCAGCAAGAC-1	-3.10454	-3.27059	-1.30989	1.71729	1.4483	0.516117	2.20862	-1.28027	1.73291	1.06167	-0.617668	0.950974	-0.828342	-0.719554	-0.250725	-2.04742	-0.515394	0.891286	1.78113	-1.01281	0.754337	1.61381	-0.822338	0.414963	-0.455948	-0.17011	0.250461	-0.538063	1.21884	0.83758	-1.58772	0.391832	-1.43968	0.652776	-1.0239	-1.52788	-0.587236	-0.0272664	0.1935	-1.354	-0.742751	-0.413621	-0.606431	-1.37076	-1.57551	0.836996	1.14751	-1.08317	0.786483
lib230524_ATCCTATCATAGAGGC-1	2.12903	-1.09895	3.52258	2.17432	-0.725478	2.76881	3.12315	-3.37575	-1.80287	-1.52567	-2.52981	-0.509092	1.94884	-3.10629	-1.53581	-0.324926	0.986789	-0.329447	1.02879	1.34248	-1.07416	0.710706	-0.691339	3.45572	0.226206	0.0839579	0.272802	-0.226321	1.6052	0.427608	0.75873	-0.523221	1.94042	1.5026	-2.38902	0.409305	-0.423849	0.605254	1.63012	0.857336	-0.0780183	0.914474	2.51428	-0.197836	-0.865615	-1.39181	-0.870509	-1.09719	-0.953435
lib230524_ATCGCCTAGTCGCGAA-1	4.14452	-3.09357	9.43414	1.62968	-5.48163	-8.21652	1.89903	-3.26661	1.04702	-2.31889	2.7141	3.50079	1.22339	5.77352	0.106028	2.99387	-0.683809	0.377309	-3.97711	-0.661417	2.04685	0.410058	-0.0781016	-2.54071	-0.907884	1.27278	-1.0763	-1.43654	-0.705104	2.23303	-0.514022	0.134795	-0.585594	0.484844	-1.01359	-0.271296	-3.38717	2.16714	2.7165	-3.36401	-1.08637	0.656125	-0.838672	0.098794	-0.426806	-0.177701	-1.68695	2.92737	-4.4758
lib230524_ATCGCCTTCTCGTTTA-1	2.55327	1.25797	2.72949	2.06798	-2.19925	0.506011	1.62717	0.456823	-1.04025	-2.87546	2.58841	-0.754338	1.13698	-1.69845	-0.405723	-1.14896	-0.144008	0.556647	-1.10155	-2.53433	1.11781	0.0667119	-1.87386	-1.47197	-1.0689	-0.305539	0.687329	0.832352	1.28075	1.25198	3.93816	-3.17308	2.45621	1.45512	-3.79363	-2.28953	-2.05366	0.388827	-0.574297	-0.94527	-1.13855	-2.0916	-2.47642	2.02377	-0.481991	-0.852327	0.318597	-4.20887	-1.72891
lib230524_ATCGGATCAAATTGGA-1	-4.00273	-3.26966	0.79156	-0.101183	-0.694972	-1.91267	1.0224	-2.46487	0.811836	-0.247275	-0.697657	-1.66321	1.21077	-1.1275	-0.532045	-2.10275	0.792423	1.02146	-0.269679	0.0616456	1.27027	-0.905633	-0.0699831	-0.518602	0.639851	0.23641	-1.0295	-0.51185	1.21998	1.63463	-0.154646	-0.0707481	-1.53484	-0.662758	0.6914	0.267609	1.47479	-0.812074	0.605838	0.641747	-0.326979	-0.657606	0.415051	0.316009	0.707363	-2.13698	-0.499871	-0.671392	0.189391
lib230524_ATCGGATGTGGACTAG-1	-4.10644	-1.69636	-2.56403	1.8707	2.46188	-0.364832	2.76256	-0.935151	-0.146249	0.983981	-0.50896	0.357838	-0.535459	0.40487	-0.778023	0.464176	-0.227709	-1.40497	-0.567314	-0.957983	-0.323499	0.6999	-2.09738	1.15723	-0.00421368	1.26574	1.44582	-1.22411	0.742154	-0.803669	0.937927	1.61902	-1.06136	0.888822	-2.07185	-1.36417	-0.9777	0.276957	-0.171991	1.78149	-0.652774	-0.402453	1.45643	-0.412627	-0.536439	-0.455098	-3.21466	0.565437	0.838495
lib230524_ATCGGATTCCACGTAA-1	-1.88184	-3.99573	-0.0545296	0.266354	0.479952	-0.896676	1.41726	-2.30181	0.991762	1.20718	-0.693013	-1.11105	1.2954	0.305816	-0.0269002	-0.852853	0.00732029	1.2506	-1.09662	0.580122	-0.133731	0.686121	0.636499	0.208231	-1.38321	0.204157	-0.531889	-1.06037	-0.000775391	0.595289	-0.175747	-0.148937	0.584181	-1.53946	-0.390844	0.73366	-0.731025	-0.28931	-1.73249	-1.62802	-0.563354	1.41941	-0.408725	-1.56268	-1.03377	-0.438608	-0.94403	-0.267343	1.40885
lib230524_ATCGTAGAGCTTTGTG-1	4.02368	-2.45083	6.92891	4.67897	-2.05955	1.94983	1.54196	-1.13035	0.324773	0.529849	-0.603872	-0.075024	1.42325	-0.192469	-0.658062	-1.19466	-0.513774	0.635516	0.900346	-0.167834	0.699272	0.893593	-0.448582	0.176096	0.868681	1.70527	0.396577	0.760486	1.03664	-0.104901	0.750051	-0.72672	-1.06274	1.81852	3.31784	0.463529	1.09387	3.28903	2.82267	1.62413	-0.225065	0.558082	-2.25684	-0.791364	-1.98353	1.08088	1.04765	0.114435	2.88437
lib230524_ATCGTCCCACATATGC-1	12.45	0.89267	6.52169	2.73791	0.904304	0.991975	1.35759	2.59077	1.26689	0.188996	1.06468	0.423461	0.561275	-2.03183	-0.932352	0.0845338	-0.810756	-1.01505	2.63349	-2.84874	-0.891557	-1.63841	-0.951364	-2.86454	2.41824	-1.13782	0.891965	0.0685262	-0.495133	0.951065	-0.973292	-2.24539	2.31068	0.105827	-0.21237	-0.00163631	-0.331327	0.457315	-1.53668	1.66039	-1.97032	0.26592	2.79783	-0.117042	1.01414	0.0497039	0.867247	-0.822147	0.265407
lib230524_ATCTCTAAGCCTCACG-1	0.295803	-3.57899	7.74201	0.595641	-3.23635	-6.81062	2.95584	-5.13909	0.00123876	-3.94448	3.05814	2.67423	-0.691814	3.0823	-0.387452	1.05821	-1.96598	-1.47193	-2.33932	-1.92706	3.28408	1.39091	0.951008	-2.32945	-0.734151	1.34023	-1.70976	0.0102155	-1.27492	-0.52555	1.24027	2.84302	-0.110239	0.768169	-0.374849	-1.08588	-2.16158	-0.677676	1.10782	-1.45094	-1.14248	1.52093	-0.775673	-0.191576	0.489359	0.827475	-0.537498	2.07671	1.08059
lib230524_ATCTCTAGTGAATGTA-1	4.83065	-2.76657	9.54662	2.34128	-3.27587	-6.62776	2.04147	-2.4047	0.454842	-1.47765	1.30779	4.073	0.0587169	2.03068	-0.485219	1.96424	-0.773506	-0.905673	-2.7079	-1.29521	3.18216	2.71898	1.50857	-4.39554	-2.4088	-0.301662	-1.3391	-1.9445	-3.16681	0.76553	-1.22981	1.68552	-1.71685	1.55165	1.81401	-0.636209	-2.55961	-1.07102	1.48304	-1.56192	-0.644292	1.47886	-2.41217	0.0601879	-0.513209	0.319339	-1.6241	2.64442	-0.935777
lib230524_ATCTCTATCTTGGAAC-1	8.18853	-0.249162	11.6764	2.78855	-0.846008	-8.43851	4.00522	-1.60415	1.32218	-0.111209	3.15388	3.4706	0.792726	3.98459	-0.309338	1.74831	-2.2327	0.869716	1.45324	-3.075	2.44018	-0.461488	0.618618	1.05593	1.50921	0.721111	0.264901	-0.908407	-0.245224	-0.556224	-0.182758	3.23106	2.07379	-0.37475	1.64674	-1.3622	1.13943	-0.375495	-1.86288	-1.68018	-0.0271858	0.794273	1.95171	0.861205	2.22979	1.97514	0.478737	-1.1891	3.81358
lib230524_ATGACCACACTCGATA-1	5.02052	1.56045	2.15551	3.25892	-2.99034	-0.0540237	0.142058	-2.95734	0.660889	-1.49273	0.550861	-2.39989	2.28479	0.577805	1.37155	-3.20132	0.128163	-0.856177	2.95837	1.99797	-2.39154	6.53152	1.04244	3.22973	-0.912295	-0.998883	0.81047	0.0913817	-2.22186	0.858285	-0.787809	-0.946952	1.26886	-0.691326	2.99384	0.495211	-1.93099	2.77661	0.683567	1.11022	1.88749	0.226768	2.07073	1.18371	3.43483	-3.63855	-0.543762	-1.62744	-0.605926
lib230524_ATGCCTCTCAGCTCTC-1	0.954289	-2.78592	7.58854	1.0373	-3.88887	-5.06066	2.89431	-3.80214	0.470764	-2.45203	0.246888	1.31688	-0.4392	2.12455	-0.358373	2.15014	-1.58383	0.178207	-1.76881	-0.554592	2.32193	0.810421	-2.38978	-2.38602	-1.64595	-0.0172247	-1.85673	-2.28568	-1.91417	0.5677	0.361475	1.67003	-0.132745	0.421995	-0.142155	0.784122	-1.8082	0.899222	1.4497	0.157835	-0.49024	0.399998	0.0945693	-0.622987	0.0540904	0.501686	-2.00397	0.217639	0.143777
lib230524_ATGCGATCATGGGTCC-1	0.814576	-2.64385	0.878651	0.5855	3.66881	-0.489876	3.86451	-0.315868	2.60782	1.59035	-0.683397	-1.06148	2.12153	-1.35618	-0.504573	-1.15743	1.7811	1.02384	3.54605	-0.00381705	-0.430217	0.949234	0.827035	-0.0334508	-0.982769	0.412689	1.30085	-1.99439	-0.116956	0.0799259	0.1901	0.323607	-2.28412	-0.743098	-1.72945	-2.74689	-0.926702	1.53806	-0.324988	-1.39262	-2.92647	-0.672511	-0.211773	-0.0770424	0.115667	-0.096769	-0.265973	1.28234	0.678967
lib230524_ATGGATCAGGTTATAG-1	-0.993313	-2.85172	0.298434	-0.910551	-1.32876	1.05086	0.72602	-2.83682	0.106508	-2.94916	-0.645016	-1.53615	1.34742	-2.30692	-0.384601	-2.9394	-0.91649	0.0698485	-0.456097	0.241416	1.27223	-0.161413	1.20729	-0.785237	-1.93147	-0.327941	-0.814842	0.593777	0.211152	0.628707	0.189944	-0.0613367	1.75213	-0.199626	0.874846	2.49002	0.304474	-0.180172	0.776478	0.789112	1.23715	-0.437772	-0.837156	0.366435	-1.13686	0.407989	-0.386741	0.614549	0.911445
lib230524_ATGGATCGTTCGGCTG-1	6.09996	-2.05895	4.17875	2.11123	3.35212	0.389215	5.02493	-1.06891	1.80405	-0.267289	-1.03657	-3.95775	2.9374	-2.26546	-1.1466	-0.218836	0.420936	-0.763839	2.33133	-0.227307	-2.5179	-2.17246	1.23619	0.663964	-0.696041	-0.906633	-1.2075	1.90631	1.24904	3.44236	-0.965092	-3.87639	1.06098	2.09413	1.65059	1.45415	-2.07161	-0.765303	-1.04291	-0.227696	1.28373	1.38144	0.923209	-0.0943384	2.60776	0.429295	0.00059128	2.62407	-0.907939
lib230524_ATGGGTTTCACCGGTG-1	-0.809273	-5.13478	4.63274	0.00988338	-1.47176	-1.46765	2.36776	-3.21733	0.623017	-0.822687	-0.072558	0.611016	2.42478	-0.976246	-0.255004	-1.45764	-0.0629841	0.1086	0.12167	0.473331	0.289032	-0.174118	-0.0210988	-1.7636	-0.421546	-1.86706	0.284582	-0.519983	-0.139051	0.0609875	1.03962	1.83596	0.154163	0.258048	-1.16229	0.149334	0.250974	-0.0170809	-0.738989	1.38704	-0.829154	0.571632	0.293006	-0.259885	0.780882	1.50054	-1.31842	-1.33123	1.06757
lib230524_ATGTCCCCAGCTTTCC-1	5.77108	-0.83684	3.75404	3.43885	2.81139	0.0262867	5.09329	0.65146	2.51854	0.595109	2.17149	1.43599	-0.106173	-1.66072	-1.38999	1.5876	1.35363	-0.625909	0.0475525	1.4529	-1.30214	1.19925	-1.19419	3.13028	-2.16502	-0.251487	3.50079	-2.8069	0.318927	-3.31293	3.64267	3.60607	1.7504	1.0164	-1.10614	-1.18228	1.45258	-2.16488	-0.943666	1.42161	-0.928613	2.54464	0.857197	0.467708	-0.11176	1.96192	-0.984812	-1.56705	0.340258
lib230524_ATGTCTTCACCTATCC-1	-4.75958	-3.72135	-0.232985	0.691808	0.792137	-1.69856	0.0397903	-1.23654	1.17254	0.168111	-0.234182	0.0364542	-0.0837361	-0.196527	-0.231286	-0.00878417	1.63303	1.7876	1.2733	0.325169	-0.405942	0.152659	-1.04307	-0.0321814	-0.101299	-0.781595	-0.53538	-0.740026	-0.111142	1.14531	0.471668	0.838714	0.115607	-0.728736	-0.365135	-0.363141	-0.645053	-0.398489	0.728663	1.87795	-1.23681	-0.497589	-0.211692	-0.959985	0.0517134	-0.259227	0.0157079	-0.179502	-0.401488
lib230524_ATGTCTTTCAGCTTGA-1	-0.658861	-2.90634	2.93875	2.1647	0.113698	0.003995	3.41715	-1.69773	1.91397	-1.77073	-0.547306	-1.05564	2.32998	-1.42064	-1.53468	0.414164	0.0145513	1.93734	1.44169	0.394308	0.454523	1.19957	-0.910959	1.28801	0.764431	0.155138	0.853486	-1.71514	0.0651226	-1.02489	1.63592	2.48496	-1.45467	0.933086	1.46801	-0.745994	0.678087	0.716591	-0.164827	0.792803	1.03931	0.0774585	-0.951018	-0.702617	-1.00178	0.150513	0.117327	-1.76802	-0.622064
lib230524_ATGTCTTTCTGTAAGC-1	3.00162	-2.04805	10.1167	4.15112	-3.8659	-8.44299	1.041	-2.0232	0.606867	-1.75149	1.95366	2.74625	1.62609	3.85679	-0.413456	4.0219	-2.35238	1.17582	-3.92593	-2.73822	1.79043	1.44284	-1.62216	-1.47569	1.4838	-0.916207	-2.02889	0.688691	-1.65522	1.44612	-0.792793	0.400916	0.446778	0.641587	-1.02716	-0.822302	-0.433255	0.362977	0.72497	-3.69836	-0.153684	1.48568	-0.295771	2.24451	1.08994	1.39201	-1.53681	0.967488	-1.30568
lib230524_ATTACCTGTTGTGTAC-1	5.49559	-1.74354	3.38607	-0.202541	-0.439828	1.2038	4.29121	-2.06625	1.11747	-1.44635	1.15553	-2.56997	2.03391	-3.84374	-0.618071	-0.773107	-0.341553	-0.883274	4.21767	2.28324	-3.23276	-0.837109	2.08397	-0.145686	-0.163018	-0.347891	-2.60137	2.5405	0.167196	0.471324	-3.11596	-1.11434	2.20093	-0.820533	2.26974	0.851128	-2.56195	-2.38944	-3.91788	0.904212	-1.56272	-2.15749	1.98959	0.750679	3.47207	0.788638	0.582287	-1.29122	-1.1368
lib230524_ATTACTCTCTGCGAGC-1	8.54942	-1.54443	6.24324	0.470615	0.974853	-0.165539	1.7782	0.124274	0.460341	0.118857	0.0705176	2.27706	2.98264	-0.952106	-1.42818	-0.591718	-0.109153	-0.592072	0.664408	1.61292	-1.72995	-2.37897	-0.286973	0.634177	-1.03615	-0.298891	0.625378	0.698813	3.08839	-0.603984	0.621204	-0.640596	0.722067	0.686824	-2.31094	2.3448	0.114512	-0.873961	-1.29093	2.38332	1.16487	0.0285143	0.280665	0.00119942	-0.838349	0.748914	2.25138	-1.26243	0.103509
lib230524_ATTATCCTCTGGAGAG-1	2.81278	-4.04577	5.76968	0.057835	-1.54115	-3.50572	2.7848	-5.24824	-0.802559	-0.54681	0.931626	2.12102	2.00368	0.925718	0.337823	-2.07981	-0.937112	1.7985	-1.88216	-0.664178	0.910312	-2.40057	1.16632	-2.30355	-0.670739	0.060819	0.0594671	1.48038	-0.159711	0.192295	0.598915	0.627947	-0.885831	0.583091	-0.74244	1.09438	-1.7477	-2.98838	-0.7672	0.647147	1.1698	-1.32398	-1.65581	0.0927973	0.972513	0.826743	0.585347	-0.906781	0.348806
lib230524_ATTCACTCACGGGTAA-1	0.550806	-3.38976	8.56988	1.08127	-4.4022	-7.6592	1.31662	-1.67458	0.990489	-0.477562	2.24233	3.57544	1.41648	4.18175	-0.383301	2.0412	-1.97879	0.356775	-2.75774	-2.24295	3.42471	0.759953	0.93679	-1.71293	0.187654	0.636308	-0.806492	-1.30633	-0.238333	-1.27445	-0.584559	0.45491	-2.5795	1.27619	-0.886598	0.783961	-5.38528	1.24102	2.52253	-0.547975	-1.69767	0.794592	-2.44067	-0.188155	-1.21605	-1.71088	-1.14982	1.98084	-2.84314
lib230524_ATTCAGGCATTCTGTT-1	-4.45377	-0.980449	-1.81267	2.61454	2.07109	-1.05957	2.12481	-1.8696	1.08111	0.933962	-1.26974	1.62746	-0.197037	0.624886	1.84467	-1.8658	-0.455396	0.311678	1.28759	-2.20794	-1.40187	0.442999	-1.66613	-1.95614	0.549192	-0.432065	2.17585	-3.08134	1.00442	1.51171	0.859781	-0.492159	-0.40213	0.237492	-2.22354	-0.421566	0.0719375	1.89919	-1.15094	0.773653	-1.46897	-0.120983	-0.596592	0.728869	-1.47984	0.0377833	-0.412386	0.637749	-1.25589
lib230524_ATTCCATTCCGTTTCG-1	-5.09438	-2.46682	-1.21606	2.73283	-0.91652	0.293742	1.56558	-1.36378	0.738432	-0.911819	-0.122914	0.531444	1.50074	-0.937751	0.675555	-0.688287	0.751495	-0.68475	-1.84263	-0.228121	-0.603413	0.729806	0.410781	-0.809303	-0.669055	1.34651	-0.472723	-0.20391	-0.580117	0.588414	1.22127	1.0344	-1.47218	0.498795	0.785693	-0.852942	-0.488251	-0.101304	0.8058	0.988875	0.908547	0.540997	-0.345316	-0.940636	-0.532647	1.29714	-0.745663	1.93555	-0.789127
lib230524_ATTCCCGTCCTAGAGT-1	-1.37132	-2.05613	0.550618	1.01567	1.15564	2.29702	2.43493	-2.38776	0.787355	1.09275	-0.991551	-0.149882	1.00282	-0.589474	0.769003	-1.08176	0.135427	0.142665	-1.00587	-0.572066	1.02168	-0.112116	-1.43977	-0.13972	-0.905654	1.99887	-0.023106	-0.0235248	0.272999	1.95101	1.49655	-1.55994	2.39707	-1.31396	0.799024	-0.00730513	-0.11197	1.12867	0.0377809	-1.10637	-1.00375	1.36186	0.501822	-1.54992	-2.1757	-0.0011596	-1.5044	1.25281	1.91771
lib230524_ATTGGGTAGCATCGAG-1	-5.2661	-3.71383	0.0860459	0.524663	-1.1877	-0.340361	-0.563922	-1.27679	-0.319027	-0.421478	-2.04588	0.23208	0.332724	0.379872	-0.450166	-1.16886	-0.401249	-1.67701	-0.964838	-0.903718	0.425086	-0.297495	1.11137	-0.0481395	0.677637	0.16241	-0.132523	-0.469911	-0.167546	1.60376	-0.304793	-0.296234	-0.58184	-0.135323	-0.301442	0.329396	0.319633	-0.376628	-0.334243	-0.432778	0.50685	-0.765717	-1.07211	0.329669	-1.11891	0.964135	1.21648	-0.200446	-0.210186
lib230524_ATTGGGTTCTAATTCC-1	-6.95832	-2.27945	-0.801124	1.1905	-0.181246	-0.00668836	0.289864	-2.83234	0.278391	-1.26148	-1.18548	0.0717313	0.38012	-0.128692	0.152571	0.657056	-1.20545	-0.780765	-0.204772	-0.559427	-0.2197	-0.120724	0.499061	-0.92264	0.674106	-0.607479	-0.193988	-0.12502	-0.399735	-0.628238	0.305617	-0.855517	0.171105	1.2809	-0.468381	-0.404773	-0.198141	0.133786	-1.14802	0.117002	0.48259	0.527032	-0.406119	-0.82702	-0.617282	0.380875	-0.0158908	-1.61563	-0.232885
lib230524_ATTGTTCCACCGTGCA-1	2.1218	-0.478362	4.88104	6.0833	-1.45787	0.859637	2.83679	-1.37736	1.4785	-1.21897	1.29172	1.33603	0.947282	-1.42219	-2.19072	-0.567711	-1.2022	3.61323	3.5774	-1.51678	0.624526	2.09181	0.147424	1.02342	0.865397	0.190193	0.373678	-0.39224	-0.725457	-0.347095	-0.356551	2.511	0.554228	0.9459	-0.516201	-0.196467	-1.3303	-0.086065	0.946584	-2.17657	0.732742	-0.144225	-0.867341	-0.0911328	-0.536736	-1.10612	2.04605	0.784341	-1.40928
lib230524_CAAAGAAAGGAATGTT-1	7.89064	-1.80647	5.1412	1.33171	1.63057	2.06456	4.768	-0.488077	1.39208	3.66036	-0.434174	0.605269	3.88348	-2.49169	0.300638	-0.231987	-0.139116	-0.696019	0.373949	-0.201078	-2.42051	-1.96787	0.69617	0.485861	0.435332	-0.364445	0.374974	0.159398	0.62939	-0.91841	2.6251	-0.259138	1.53526	0.530758	2.69078	-0.418816	2.08925	1.00323	0.83288	1.13181	-0.349515	1.52503	1.53441	-2.5753	-4.47114	-1.38544	-1.87355	1.10073	-1.00393
lib230524_CAACAACCAGGTATGG-1	-6.48139	-2.49931	-1.20682	1.0409	-1.74957	-0.699648	0.326557	-1.14611	-1.18611	-1.97537	-1.42497	-0.71386	1.11834	0.18984	-0.385249	-0.904936	-2.04493	0.755612	0.0435843	-0.817932	-1.19801	-0.542079	-0.141234	0.0652493	1.05857	-0.587895	-2.20919	0.353259	0.659443	0.983576	1.93893	-0.656849	-0.0288292	0.144069	-1.13155	0.987423	-1.17151	-2.17822	1.0983	0.908361	-1.80588	-0.10046	1.62216	0.980057	-1.42932	1.24243	-0.636737	0.326849	0.12992
lib230524_CAACAACTCTTCGTAT-1	1.19862	-4.39287	4.94672	1.46232	0.107448	-3.33913	-0.35905	-2.57308	0.0241518	-1.34037	-0.126434	1.07846	2.85125	0.144746	-1.22605	-0.227155	0.288267	1.50888	-1.422	-0.749561	0.528919	-1.25781	0.527998	-1.3903	-1.64205	-0.467303	-0.021735	-0.594661	-0.0597512	0.490543	1.74357	-0.279102	-1.0893	1.47355	0.806887	-0.414914	-1.87187	0.0608738	-1.09455	-0.0208307	0.400131	0.400776	-0.915978	-0.464945	-0.0529999	1.2535	0.943893	1.15522	0.611876
lib230524_CAACCTCTCCCATTCG-1	-5.12143	-2.82226	0.634695	0.534057	0.266255	-1.29102	2.24343	-2.01589	1.47907	-0.144561	-1.20437	-1.02958	0.502829	0.547427	0.741375	-0.67348	0.283826	1.02163	-0.537254	0.615291	-1.1171	0.531016	-1.5157	0.83955	-0.100607	0.409413	-1.02816	0.674771	2.3144	1.54649	0.948549	1.06904	-0.639004	-2.24621	-1.40123	-0.392951	1.35497	-1.14754	-1.14671	-1.58347	0.0557443	0.309315	-1.17021	1.23245	-1.37767	0.827412	-0.876167	-0.0574896	1.16762
lib230524_CAACGATAGCACACAG-1	4.96258	-0.98714	2.91245	2.47122	1.02347	-3.85821	-0.727569	-1.17319	-0.816927	-0.21577	-2.18408	-0.347763	2.71686	-0.681824	-0.224039	-0.931925	-0.544264	-1.49414	-2.17203	0.715291	1.3146	0.47374	0.391627	-0.405404	-0.407685	-0.135434	2.25056	3.55846	3.99662	1.85746	1.53878	-1.26534	-0.575215	1.05594	0.678565	0.577671	-2.8093	1.7407	-2.10677	0.0532975	2.04014	0.319228	-2.79615	-1.54179	-3.19776	-0.763991	1.86498	1.75052	3.11214
lib230524_CAACGATAGTAACCTC-1	-1.66163	-2.86527	-0.303413	0.778508	0.544171	0.276661	1.03304	-2.29966	0.695975	-0.99354	-0.691314	-1.45417	1.25096	-1.97433	-0.269604	-0.931512	0.865006	0.353726	1.00824	1.63446	-0.0854237	0.439347	1.25766	0.655384	-0.226306	-0.0730886	0.283293	-1.1171	1.31794	1.53816	-0.555995	-0.962355	2.01153	-0.452022	2.08316	0.324623	-1.55791	-1.57674	0.167325	0.220332	-0.566662	0.652668	-0.691112	1.07766	-1.40284	-1.1565	-0.316891	-2.39638	1.20738
lib230524_CAAGGGAAGGACTAAT-1	2.85204	0.0185036	-1.48366	-2.37523	0.0966438	2.19501	1.84816	-3.08958	-1.70076	-1.10719	-0.902067	-3.00743	3.73896	0.490175	1.47119	-1.50328	-0.515837	-1.45293	-1.71036	-0.624241	1.50891	1.50714	2.80305	-2.37202	-1.33289	-0.24042	3.10591	-0.00253612	-2.60027	3.12238	-1.34242	0.108401	4.94284	-2.30996	2.18423	0.962892	1.62482	1.76573	-1.41323	1.74359	-0.686958	2.69833	-1.14143	1.26186	-0.211905	1.47763	-7.8314	-4.39679	-1.07205
lib230524_CAATCGAGTAGGACTG-1	-2.17142	-0.691043	-3.34915	6.6609	2.19133	5.36691	4.86929	-3.42847	3.15095	-1.69433	0.312752	-0.566668	2.90212	-1.83054	-1.28244	-1.18769	-0.896751	0.623276	3.1665	-1.06527	3.99414	1.15453	1.50592	0.698237	0.612092	-0.321688	-2.2403	-1.46719	-0.116831	-0.195991	-2.11789	-1.44784	-0.00326358	0.105401	0.717611	-0.691245	-2.003	1.3342	1.57549	1.24167	-1.50186	1.29953	1.16761	-3.55959	-1.30838	0.249558	0.455493	1.35731	3.96732
lib230524_CAATGACTCATGCGGC-1	3.35202	-3.89729	9.83416	1.47773	-4.18695	-3.70543	1.00977	-1.28058	0.072749	0.53695	-0.601914	1.85183	-1.00692	3.04953	0.669924	2.19556	-0.912295	0.424982	-3.88245	-0.784997	1.80487	-0.686127	-0.94071	-2.43932	-1.27575	0.255735	0.360311	1.4646	1.02454	0.835508	0.594386	-1.33618	-0.809793	-0.380191	-2.80088	0.441863	-0.0213772	-0.797735	-3.02402	-0.188225	1.26503	1.432	-1.1906	-1.67773	1.88347	-0.767619	-0.133673	-0.12197	0.806832
lib230524_CAATTTCTCTGACAGT-1	-6.52533	-3.15307	0.25796	0.70578	-1.88952	-0.633242	0.536138	-1.63744	-0.859025	-0.990015	-2.38521	-1.09704	0.213158	1.15496	-0.842548	-1.31522	-0.068803	-0.189056	-1.08799	-0.62635	-0.368982	0.346794	-0.423133	-0.850993	0.398935	-0.457397	-0.741507	0.524384	-0.432747	0.704673	1.3568	-0.240416	0.208222	-0.293137	-0.595322	0.316287	1.55072	-0.166361	0.00684264	1.37176	-0.582764	0.560317	0.53609	1.28945	-0.365359	-0.645838	-0.71847	1.13388	0.015365
lib230524_CACATGAGTGTGGTCC-1	-0.665633	4.74575	-2.62916	-2.1131	-4.25024	-1.36708	-1.61918	-6.81014	-3.29748	5.11514	0.657678	-6.10304	-0.360284	0.711024	2.19385	-1.85637	-0.173936	-4.31936	1.45665	1.74995	-0.633633	4.0069	3.71358	-1.02115	1.81643	-2.56988	2.65871	-0.375137	-2.04133	3.12395	2.22321	-0.0328605	0.522706	0.34431	-1.90105	-0.774782	0.338858	3.54441	-4.47958	5.56484	0.398408	2.35645	2.98183	-1.80228	3.50399	-3.11431	0.24091	-2.03229	4.52407
lib230524_CACCGTTAGGTGCCAA-1	3.70099	-1.35575	3.0553	2.85383	-4.13628	-1.17622	1.59311	-1.89138	0.986737	-3.65827	-1.08154	-0.394484	-1.39822	0.046794	-0.393408	-0.174078	-0.159236	0.773243	-0.251004	-0.604915	-1.97586	1.32053	0.346343	-0.677965	-1.18571	-0.621145	-0.843097	1.14601	-0.13581	0.384783	-1.26368	-0.749527	1.38447	-0.250191	0.376052	-0.554201	-1.52973	0.219935	-3.28866	-0.899106	-0.433739	-0.471236	1.90062	-3.21337	-3.08004	-2.06491	0.384438	1.5146	1.64619
lib230524_CACGAATGTTGGGTAG-1	2.03695	-2.14069	8.79566	1.86434	-4.17194	-8.11868	2.19836	-2.81375	0.721046	-3.16369	1.25051	1.69758	0.718892	2.34675	1.33738	3.24027	-3.44316	0.606144	-1.88225	-1.02108	2.24134	1.4711	1.03145	-1.21339	2.50056	0.462594	1.38067	1.12551	-0.0468869	1.68831	2.00773	0.746368	1.11903	1.33699	-0.132846	-1.51734	-1.07444	0.109354	-0.0829144	-2.4673	0.172275	-1.51956	-1.35307	-0.342397	1.46299	3.10831	-1.30536	0.27119	2.31103
lib230524_CACGAATTCTGCGATA-1	-1.28862	-3.29543	0.956739	2.21304	0.3315	1.77251	1.93037	-2.52811	1.62693	-0.0556252	-2.60144	-2.43565	2.04249	-1.31542	-0.952843	-0.0871762	-0.0167726	0.371438	-0.256269	-1.5374	0.542556	-1.36345	-0.856178	-0.299293	0.571461	-1.65629	-0.568806	-1.90492	0.688739	-1.02327	-0.66146	-1.60346	-0.4043	-1.82763	1.23585	1.50394	1.34966	1.29303	0.72431	1.0768	0.657664	2.87468	0.269949	-1.57001	0.625007	1.81034	-1.47465	-0.596265	0.476122
lib230524_CACGTGGAGAAATCCA-1	10.0305	-0.602833	12.7799	2.2207	-1.98966	-8.72026	6.36785	-0.219701	0.333096	1.2824	3.30161	4.85534	-2.11081	4.54096	0.413134	6.54535	-1.17557	-1.38484	-1.20184	-1.57846	-1.66499	0.530717	-0.510381	2.0614	0.740466	-0.166606	-0.627687	-2.09673	-1.94762	-2.47062	-0.117532	3.26955	3.34901	-1.18272	0.850772	-1.96817	4.92173	-2.97528	-2.19652	1.35114	3.46201	-0.314803	3.76534	0.153085	1.02249	2.07528	0.638277	-1.26895	4.05746
lib230524_CACGTGGCAGGCTCTG-1	2.46917	-2.30402	8.44201	2.64385	-4.18315	-6.30508	2.97044	-3.45991	0.806335	-1.00168	1.38723	2.01927	1.60151	2.30199	-0.0956433	-0.206436	-0.114255	0.11581	-2.55341	-0.851038	-0.0511256	0.460962	0.245811	-0.50652	0.265514	1.81345	-0.554945	0.123504	0.135512	2.76001	1.35607	0.347636	1.41399	1.7882	-2.50671	0.948786	-1.07009	0.250547	-0.682618	-0.196304	-0.0117617	-0.890274	-1.47343	1.3935	1.22798	0.564453	0.576493	-0.597896	-2.53154
lib230524_CACGTGGTCTGTCGCT-1	-0.630619	-3.88789	2.70278	-0.831876	-0.108052	-0.197948	1.65227	-2.24777	0.0365022	-0.813003	-0.715567	-1.12703	1.04925	-0.976864	-1.28257	-1.84483	1.19676	1.43589	-0.152724	-1.00901	0.0985087	0.996768	1.26323	-0.470596	-0.851454	-0.696026	-0.107119	-0.239394	0.858168	-0.491045	1.48275	0.178118	0.049549	-1.23153	-0.36495	-0.478104	-1.30584	-0.294877	-1.19146	-0.00256827	0.337391	-0.122447	-0.155777	0.697627	1.50674	-0.0801262	-0.346313	-0.466273	0.451895
lib230524_CACGTTCAGCCAAGTG-1	0.370469	-1.93853	-1.34601	-0.66961	2.94262	0.881338	2.27037	-1.3804	1.24358	-1.57885	0.0436406	0.436841	1.04843	-0.823112	-1.65673	-3.16055	-1.20693	0.532145	0.446945	-1.07898	-3.35946	1.66886	0.0323158	0.769719	-0.542109	-1.94209	1.4583	-0.265276	-1.0477	-1.05423	0.421932	-2.23823	-0.870192	-1.20079	0.514686	-1.62483	-0.383617	-0.729253	-0.897543	-0.701951	0.0503643	-0.902818	1.24555	1.0614	1.72484	-0.925154	-2.60875	-0.550173	1.543
lib230524_CACTGGGGTCCACTTC-1	-2.04707	-3.75352	2.82294	-0.0903749	-2.1558	-0.411636	1.88688	-3.35093	-0.394844	-2.26602	-0.555674	-0.796601	1.57948	-1.29341	-0.571099	-2.03944	0.731312	-0.70242	0.9436	2.05992	-1.34809	-0.0732931	0.248162	-1.51297	0.0178002	0.800759	-0.451899	0.0749304	-0.981613	-0.14571	0.560571	0.28293	-0.711947	-1.2217	-1.22832	0.289026	0.399042	-0.65446	-0.015308	0.432505	0.756948	-0.55449	0.568723	-0.433481	0.161896	0.542915	0.133899	-0.288527	0.11719
lib230524_CACTTCGAGCCGCACT-1	-5.26809	-3.84664	-1.32147	0.780133	-0.445249	-0.664042	-0.539066	-1.07869	1.23159	-0.719704	0.290616	-0.69911	0.398647	-0.0320803	-0.166937	0.101224	-0.487003	0.634144	0.703516	-1.07481	-0.243693	-0.314679	1.0503	-1.03585	0.673474	-1.26354	-1.19459	0.175386	-1.45043	-0.39699	0.427753	0.318122	-0.383334	0.0505444	-1.00938	-0.593344	-0.0117541	-0.346228	-1.32275	0.199804	0.0840154	-0.991451	0.658776	-0.603744	0.136645	-0.185039	0.241057	-0.20262	0.421316
lib230524_CAGAGCCCAGTCCCGA-1	4.55749	-4.14548	6.49143	-0.257846	0.310804	-0.404315	5.64542	-1.49613	0.662913	0.406425	0.799632	-0.544001	3.63992	-0.299019	-1.18479	0.908163	0.215903	-0.713494	0.732772	1.19657	-1.16464	0.693484	-0.261484	-2.95313	-0.802005	0.685221	0.119073	-1.51779	-1.60712	-2.69825	0.948027	-0.915397	-1.44651	-0.960348	0.654899	-1.62131	-0.869118	-0.426412	-1.38414	-0.739104	-1.25256	-1.2029	-0.147453	-0.957522	0.931941	0.32961	-1.55077	-1.41225	-1.46823
lib230524_CAGAGCCTCGAACACT-1	-1.88545	-1.88813	-1.4115	3.42649	2.69942	0.244958	1.88364	-0.015232	3.096	0.234236	0.751484	0.64905	0.680095	-1.36619	0.502308	-1.41693	0.739049	-1.12666	-1.17417	-1.06649	0.51258	-0.703783	-1.52995	-0.52488	-0.741673	0.731178	1.31524	-1.32763	0.156228	0.352448	0.410399	-2.49107	-1.23515	-0.463934	-0.112603	-0.992339	-1.14301	-0.227226	-1.29723	-0.133106	-0.846083	-0.619862	-0.0804217	-0.336957	-1.57625	0.822055	-0.236927	-0.444606	0.331925
lib230524_CAGATTGCACTGTCCT-1	12.408	4.59017	1.94064	3.50625	3.27086	1.63243	3.54489	-0.931961	-0.748736	1.27982	-0.719859	-1.51866	-0.311943	-0.0416413	1.01582	-3.71452	0.0842275	-4.02598	-2.19949	3.34444	-2.44822	-3.73379	-1.4473	-1.23131	3.72121	1.25161	3.649	2.05458	0.116605	3.34614	0.688482	-1.53047	0.444322	1.39775	-0.680413	-0.0961368	3.42299	5.31703	-0.969223	-1.39248	-0.830299	5.67922	2.63828	1.65114	-3.12087	-2.16107	1.63923	1.85438	1.68007
lib230524_CAGATTGTCACCTCAC-1	0.233963	-3.31207	3.91518	2.34748	-0.432089	-1.04897	3.77789	-1.82183	1.32336	0.944407	-2.86982	1.69603	1.22436	-0.153724	0.0116297	-1.7446	-0.115364	0.0608507	0.337151	0.828781	-1.02733	1.47963	-1.00506	0.421433	-1.65132	-1.22893	-0.472746	-0.196654	-0.136757	-1.61695	1.60382	2.5002	0.710399	-1.01582	-0.177166	0.0949073	-0.245996	-0.490474	-1.94671	2.93412	-1.38736	-0.78512	0.10444	-0.904221	1.72006	0.737337	1.59367	0.526566	1.98652
lib230524_CAGCAATAGATTGATG-1	-7.55822	-4.06845	0.0672858	0.556021	-2.32334	-1.0982	-0.143083	-2.52809	0.29343	-1.62447	-1.08283	-0.678133	0.282515	0.0200503	-0.258307	-1.30982	0.133179	-0.319116	-0.196086	0.783415	-0.0591301	0.670035	-0.357387	0.352243	1.19188	-0.00629079	-0.514014	-0.495461	0.0284284	0.0861489	0.152364	0.287917	0.0289198	-0.414063	-0.326163	1.10255	1.55337	-0.794697	-0.930761	0.113712	-0.42423	0.12096	0.211528	-0.139404	0.705004	-0.862359	-0.408845	0.0600225	0.689098
lib230524_CAGCCAGCATGACTGT-1	5.63812	-2.2053	7.67835	0.581328	-2.52519	-2.38785	0.0957077	-0.138118	-2.06459	-1.07233	-0.177985	3.8662	0.352415	2.23764	0.75822	0.569924	-0.506416	1.02156	-1.12745	-1.49158	1.39689	-2.52634	0.115351	-1.65198	0.777874	-1.26048	0.700563	0.490972	-0.0457757	-0.389513	-0.0233934	-2.8369	-0.727573	2.44828	-0.627988	1.67711	0.217563	-0.0803717	-0.755829	0.00561498	2.89435	0.859646	-1.47888	-2.21414	1.23897	-1.47124	0.848104	0.41638	0.669482
lib230524_CAGCGTGCATACGCAT-1	4.6049	-2.35625	6.00191	0.737194	-1.55381	3.43042	3.30966	-0.907631	-1.20169	2.16594	-1.93105	0.685638	0.612959	0.323822	-1.15293	0.0183448	1.20861	1.11663	0.421381	2.26958	-2.81391	-0.944106	-1.04307	0.751195	-2.14105	1.28873	2.29618	0.774847	0.586017	-1.17555	-0.0467989	1.14207	-0.757039	1.57955	-1.76155	1.77576	-1.50385	0.106337	1.60439	1.9392	0.114868	-1.78006	0.286708	2.10843	0.583052	-1.38434	0.217759	-1.91451	-1.09775
lib230524_CAGGCCATCCTATTTG-1	4.03516	-0.791656	0.110017	-2.12512	-2.84765	2.70287	-0.0606064	-2.20955	-0.424767	0.193782	-1.33892	-2.86653	2.11038	-0.354485	1.57297	-3.27161	-1.44313	-2.82684	0.617879	-1.12879	-2.12054	4.62299	2.25131	1.48152	-1.84842	-1.63397	0.8228	0.0558765	-4.50909	4.62008	-3.02272	2.91834	2.22151	-2.06483	1.39596	1.98142	-1.3524	1.43101	-0.417287	-0.429853	-3.32876	4.02994	-1.06487	3.41032	-2.12728	0.230718	-2.11516	-2.50611	-1.42989
lib230524_CAGGGCTAGGACTAAT-1	-5.63991	-3.89114	1.00356	0.226314	-1.82548	-0.196745	0.887789	-2.5931	0.748455	-1.1516	-1.34008	-0.551013	0.990413	0.229636	-0.48373	-0.643598	0.173356	0.0144441	-0.291494	-0.17939	0.397865	0.700312	-1.21891	0.648753	-0.306012	0.494153	-0.24483	-1.1169	-0.454887	0.262239	1.15328	0.620902	0.339814	-0.447715	0.335341	-0.932494	0.272738	0.119252	0.258685	0.770736	-1.13056	0.251808	0.669989	0.324402	0.632537	0.814244	0.267469	-0.178817	0.368324
lib230524_CAGGGCTCACAGCCAC-1	1.24826	-1.78962	8.43149	2.80574	-5.22484	-6.77462	1.43136	-3.65657	0.94964	-2.97004	0.944649	1.82927	0.646306	3.49759	0.268002	1.47114	-0.919408	1.24469	-0.637821	-1.63454	0.93248	-0.722281	0.382955	-1.45645	-0.476472	-1.67159	-0.0450279	1.89355	-0.979193	-0.551365	0.515663	-0.210466	0.818755	-0.484606	0.208664	-0.599491	1.7955	0.687078	1.42784	-0.398794	-0.760322	-0.675213	0.0176381	2.0714	-1.35906	-1.24327	-1.49648	-0.446222	-0.00447432
lib230524_CAGTGCGTCAGTGGGA-1	8.88347	-0.901632	6.53557	0.347756	2.16911	-6.54483	0.240351	2.48069	2.35391	1.68412	4.66332	2.19017	0.545286	3.21591	-0.0363155	2.37208	-1.01453	1.61589	-1.40184	-3.81287	0.371714	-1.56222	1.3255	1.49773	1.3895	1.07029	0.193488	-0.830231	1.10127	1.42187	-2.47457	-2.56583	-2.16715	0.668929	1.06802	-0.233028	-0.156453	1.85551	1.25815	-2.51953	-0.68417	0.452121	-0.9505	-1.62589	0.68962	-0.647841	1.03987	0.323032	-0.874171
lib230524_CATAAGCAGGTTGGAC-1	3.83887	-2.92731	9.01168	1.74773	-3.56052	-2.99663	1.18883	-2.11679	-0.338519	-0.753875	-0.762211	1.05965	-0.00917868	2.01622	0.333862	2.23202	-0.523977	1.63849	-1.20361	-1.16585	1.93089	-0.899458	0.633416	-1.07591	1.68056	0.419339	-1.80134	0.446477	0.518009	1.14555	1.80423	2.41316	-0.776538	-0.535488	-2.68388	0.850909	1.18119	-1.03234	-1.18622	-0.444901	3.80551	0.673167	-2.2675	0.128229	1.88776	0.340558	1.78501	-0.226009	-0.975462
lib230524_CATACAGCACCCAATA-1	0.185264	-3.04564	0.81784	2.13582	2.67619	1.45915	2.7248	0.236394	1.80102	0.818801	-0.531369	-0.806553	1.04014	-0.340618	-1.46174	0.979471	-0.152498	1.83595	0.95076	-0.74529	-0.0863301	1.0362	-0.512456	-0.231989	-0.490129	-0.61689	1.95657	0.741305	1.20633	0.154987	1.11741	0.569362	-2.05704	1.22313	-0.839518	-2.36825	0.746806	0.759742	-1.33557	0.966581	-1.9667	-1.61654	0.548341	-1.02567	-0.333155	0.312262	0.806363	-0.0393641	2.24678
lib230524_CATACCCGTCATCGGC-1	-10.7355	4.96801	3.85596	-1.55489	-1.57185	-0.332692	0.0968547	-2.30728	0.92491	-1.4449	0.658285	0.138439	0.836657	-2.3762	3.3625	-1.41558	-0.372057	1.20299	-0.47736	1.84915	-1.73545	-1.07308	1.07633	-1.18491	0.997275	-0.628706	-0.0250617	-1.05626	-1.04427	0.540503	1.802	-0.77143	2.01682	0.0058556	-0.185603	-2.59977	-1.59123	-1.19248	1.40133	0.216151	1.11677	-1.11469	0.590918	1.09711	-0.182682	0.484997	-0.336535	-0.224406	-0.683556
lib230524_CATACCCTCTCCGAGG-1	-2.20529	-3.24981	-0.793175	0.747174	1.34504	1.36843	2.17317	-2.20218	2.25958	-0.793841	-2.12953	-2.06376	0.953815	-0.0989781	0.0121088	-2.24805	-0.323834	0.363686	-1.77577	-0.5866	-1.6114	0.806121	0.268849	0.0858978	-2.20809	0.604442	-2.43375	-0.348549	-1.10097	-0.778335	1.94952	-1.96179	1.44168	0.312989	0.932443	-1.01078	-1.08564	-0.634071	0.247451	-0.45991	0.649176	1.88957	-0.831449	-0.501595	-0.295285	-1.32026	-3.21241	0.615763	-1.73272
lib230524_CATAGACGTCCCACGA-1	-12.978	17.9797	7.48247	-8.02799	1.06494	-3.50708	1.42095	0.581669	-1.45889	1.71598	-2.20123	-1.01824	-1.39118	-0.754085	4.18018	-1.46352	-2.31239	-4.95558	4.74691	-3.79599	2.28361	3.6679	-2.51644	1.61769	-4.76083	0.743735	-0.544911	0.291774	2.9541	1.07867	1.95266	-0.193732	3.88149	-2.02441	-2.75086	-2.17029	-3.55135	-0.46602	1.34336	-3.48367	-2.59101	0.858414	4.91208	-0.992717	-1.25065	3.0181	1.00603	-3.33724	3.91234
lib230524_CATCAAGCAACCAGAG-1	1.68103	-2.87683	9.19311	1.88199	-4.65245	-7.94062	1.41828	-4.08662	1.29969	-2.70171	1.60193	2.62569	1.90371	4.12778	-0.30381	1.92099	-2.74221	1.25645	-3.60932	-1.1219	3.53154	1.42201	0.309701	-2.68166	0.139187	0.700306	-0.811188	-1.6417	-0.482668	2.08959	-0.473097	0.894652	-0.497712	0.630403	-1.69524	-0.224908	-1.68058	0.645767	0.759684	-0.688533	-1.22121	-0.122287	-2.34808	0.889072	0.0630946	-0.897983	-0.906298	2.34694	-0.0567973
lib230524_CATCAAGCATGTGGTT-1	2.33718	-1.42367	1.12204	-1.58086	-1.16581	-0.0129285	-0.218252	-3.74476	0.616673	0.542132	0.446841	-3.32388	1.35976	0.200383	0.265437	-3.14085	0.398031	-1.94048	-0.34091	-0.550293	0.229939	2.84059	1.43016	-0.764939	-1.62634	-3.53855	-0.393891	-1.30798	-2.94396	1.04349	-2.33642	-1.92372	2.47556	-1.49974	0.0143578	-1.01217	2.45892	1.48239	-1.14081	-3.73936	-0.881464	0.0603542	-1.78871	2.54125	-1.97259	1.91547	-2.90012	1.58971	-0.380467
lib230524_CATCCACCATCATCTT-1	-5.81046	-2.57384	-1.34193	2.82766	0.260169	-0.468782	0.471748	-3.12349	1.03739	-2.41774	-1.92535	0.0301583	0.251407	-0.0230065	-0.634862	-0.421214	-0.265832	-0.83084	-1.77342	-0.755832	-0.306546	0.977478	-2.33065	-0.0313842	0.448575	-0.312173	-0.938939	0.739271	-0.531422	0.272796	0.905294	-0.27896	0.556579	1.00063	-1.18892	-0.102105	0.334867	-1.0745	0.660436	0.420894	0.84398	-0.752793	-0.870832	0.705969	-1.15138	-1.24208	-0.796416	0.663	0.667371
lib230524_CATCCACGTGAGGATC-1	12.8678	-0.282749	9.18334	3.70344	1.74632	-0.40987	5.0134	2.11873	2.93933	2.43489	3.22125	1.266	2.12206	-1.15934	-0.506697	1.57386	0.179614	0.044033	2.4254	1.28107	-1.83147	-0.369243	0.0265745	2.73078	1.44824	0.536025	2.9355	-1.47502	2.72577	0.741371	-1.50045	1.31954	-0.287687	-0.433749	-1.92174	-1.87284	0.63548	1.29802	-0.0869744	-0.246555	0.0205552	0.969064	-1.58341	0.107902	3.13681	0.69847	2.1078	-0.981363	1.0386
lib230524_CATCCACTCCTTGGAA-1	-5.46518	-4.06008	-0.0337649	0.193969	-1.20942	-0.690866	-0.766098	-2.33623	0.482428	-1.46723	-0.553425	-0.391179	0.871024	0.481582	-0.119033	-2.1437	-0.599842	1.04022	0.508394	-0.467966	-1.37764	0.783051	-2.37857	-1.03577	1.08255	0.178014	0.692549	0.144307	-0.890064	1.51717	-0.342092	0.623463	0.609561	0.730306	-0.109436	1.19538	-0.223507	0.947549	-0.899528	0.505906	-1.47549	1.29931	-0.636191	-0.151903	-0.620269	1.57059	0.704803	-0.48319	1.33939
lib230524_CATCCGTGTCGTACAT-1	3.54756	0.343037	0.139583	1.64299	2.62548	1.50063	5.5971	-2.34859	-0.554624	-1.65716	1.53641	-1.84397	1.43976	-2.01487	-1.65549	-0.989801	-0.404262	0.793795	1.24144	-2.45631	0.961803	2.71827	1.99705	-1.03904	0.00978212	-2.41634	-1.64344	-0.196308	-0.573715	-0.375088	0.575845	-2.15753	2.00108	1.83523	1.95648	-2.96915	-0.790296	1.19174	-2.6637	-0.653336	0.564573	-3.01199	-0.447275	0.547929	1.51172	0.684141	0.434025	0.0444884	1.01661
lib230524_CATCCGTTCTCGGTCT-1	7.45811	2.46975	-0.240401	3.49043	0.582396	-1.58835	1.51927	-2.59011	1.21926	-4.38113	0.539149	-0.399754	-0.6878	-2.17864	-0.630937	0.500799	2.2236	-0.888766	-1.67697	-2.47867	-0.96852	0.634676	0.730962	1.04859	0.58488	0.831764	2.63387	3.58455	1.24876	-0.233224	-3.24663	-3.43805	1.34976	5.20296	-0.877744	-1.86704	-2.1579	-2.56172	-6.68889	-3.02206	0.172833	-3.99439	3.06877	-1.47868	-3.1376	-4.28257	-1.58697	-4.10764	0.6085
lib230524_CATCGCTTCATTTGTC-1	4.03449	-1.52412	4.53706	3.65936	-0.404068	0.948248	1.4195	-0.935434	-0.680852	-1.89635	-0.374781	-0.229463	1.30356	-1.35121	-0.43063	-2.53337	0.700928	1.18442	-0.261075	-1.61615	0.0671719	-1.34363	-0.831732	-1.26723	0.514541	-0.24918	0.263252	1.95876	4.33014	2.44698	1.42527	-2.62362	1.00339	0.788091	-1.38355	0.846519	-2.20227	-0.69212	-0.582392	0.592755	-1.51986	1.22514	-2.05363	-0.541206	-1.91929	1.78576	2.68099	0.760765	0.379281
lib230524_CATCGTCGTCTGGTTA-1	-5.99197	-3.70998	-0.220209	0.450424	0.239543	-1.12336	0.997523	-3.4744	-0.317652	-1.9058	-2.21632	0.931369	-0.378398	1.28356	-0.104274	-1.2466	0.241955	0.0797257	0.551857	-1.58033	-1.67602	-0.00823965	-0.29069	-1.00091	1.21695	1.01557	0.281527	0.0761896	0.17002	0.270367	-1.26021	-0.105836	-0.722252	0.0402023	-1.92344	-0.0422016	-0.310912	-0.243859	-0.174144	0.453597	-0.504646	-0.212331	-0.743097	0.866044	0.511223	-1.68724	0.903111	-2.20169	-0.122561
lib230524_CATCGTCTCTGATTCT-1	14.6906	1.35826	13.998	1.70183	-2.88246	-9.72479	5.31948	1.29858	3.35373	1.59354	3.40109	3.11095	-0.483195	3.51647	-0.170188	6.34163	-0.150218	-1.35754	0.850044	-0.526134	0.457461	-3.04635	-0.465903	2.90978	3.80081	-0.427643	0.778818	-2.31384	-1.82405	-2.52978	-1.76071	0.850378	4.13737	-7.17775	-0.717924	-2.86365	5.43539	-1.8088	-1.23919	0.603717	2.0891	-1.9387	4.33597	1.1816	6.83162	-0.0461168	0.408845	-1.13957	3.27004
lib230524_CATGCGGAGAGCAGTC-1	6.78118	-2.85655	9.10218	3.53541	-3.10427	-1.58598	0.654821	-1.70921	-0.540087	0.824564	0.143798	1.5234	2.89624	3.03785	0.0426395	2.05212	1.36071	1.07132	0.8621	-0.599479	1.35463	-0.470082	2.88535	-0.13486	-0.433845	-0.640612	0.379149	-0.743446	-0.975214	1.20008	2.23045	0.0137099	0.594627	1.0854	4.40501	3.23887	-1.68446	-2.27542	0.0843371	-0.928289	5.42	2.56618	-1.76524	-3.23863	1.26112	0.583103	-0.0731198	-2.27006	0.21834
lib230524_CATGCTCCACAACGAG-1	-5.49962	-2.8443	-1.70833	1.14382	-1.04935	-0.0367796	0.88511	-4.08345	0.347898	-2.11915	-1.67745	-1.55483	1.10061	-0.487593	-0.997532	-0.927347	0.220276	0.0238923	-0.158621	-1.20732	-0.0930257	1.75215	0.516115	0.600497	0.07019	0.506796	-0.02957	0.0252854	-0.989181	0.0192284	1.34421	0.920685	-0.98408	-0.431142	-0.576287	-0.482023	-0.768191	-0.40812	-0.0274384	0.997672	0.490532	-0.525158	1.8653	-0.808411	0.0107886	-0.263447	-0.272361	-1.02514	0.852059
lib230524_CATGCTCCAGGTTTAC-1	3.18014	-0.866989	0.241733	-1.85764	0.307869	1.60446	3.2358	-2.7677	-0.918815	-0.732113	-0.305547	-2.5565	0.859297	0.942709	1.87865	-2.93844	-0.647837	-0.333937	-0.370636	-2.4208	0.206574	0.688546	0.98777	0.860337	-1.61894	-0.485326	0.0755138	-3.21293	-4.11199	1.24333	-1.84452	0.425976	4.11088	-2.30282	1.25825	0.720989	-0.227692	3.44439	-1.60982	-0.723894	-0.600439	0.726184	-0.950745	1.29111	-3.81014	2.47215	-0.47699	-3.50143	-1.4832
lib230524_CATGCTCCATGCACTA-1	3.87537	-1.33133	3.67622	2.30377	0.218318	4.3199	4.27253	-3.42051	-2.71332	-0.0931315	-1.22216	0.384369	0.652143	-1.57264	-1.50499	0.198403	1.70667	1.11648	2.85369	0.693077	0.731122	-0.31773	1.48559	0.921857	-1.82144	0.967531	0.24031	0.391995	0.805537	-1.38176	-0.166242	-0.568006	0.984782	0.202702	0.65555	-0.215323	0.696148	1.17303	0.788795	2.52636	-0.0487206	-1.8031	1.96494	0.303034	-3.10355	0.999868	-1.23838	-0.335429	1.62737
lib230524_CATTCATCATGACTTG-1	1.45875	-4.52096	7.54504	0.524544	-2.92843	-2.73264	2.66832	-3.50234	0.818821	-1.3713	0.45983	1.0167	0.960673	1.39763	-0.00505284	0.832134	-1.22093	1.25992	-1.88661	-0.688765	1.69649	-0.844293	-0.251756	-0.443727	0.156118	0.0545997	1.55529	-0.203209	0.312165	-1.48916	2.36322	1.45315	-1.18044	1.71746	0.0225699	-1.28075	0.233465	-1.26389	-0.855262	-0.643729	0.198354	0.334726	-1.4032	-0.559567	0.830608	1.09932	-0.823475	0.331872	1.46885
lib230524_CATTCATTCACCGGGT-1	-0.22314	-0.657769	-0.243893	3.17577	-3.63135	-0.926588	0.721374	-3.12165	0.339551	-2.47605	-0.0894485	-1.14321	-0.256086	-1.78841	-0.309471	-2.12116	-1.56336	0.452388	-0.815156	-1.19558	0.613944	0.761529	-1.82696	-1.13614	-0.171682	-2.0547	-0.394858	1.29522	-0.128961	0.0786522	1.02129	-3.34786	-0.971959	2.35063	-1.94788	0.0967992	-4.01138	-1.66768	-1.64757	1.29701	0.80371	-2.42163	-0.335817	1.68034	-5.03883	0.776238	1.15267	-0.558419	0.27441
lib230524_CATTCCGAGCGCCCAT-1	8.09672	-2.35508	9.61153	1.97175	-3.2405	-4.87919	1.29173	-1.42174	1.18664	-1.53853	3.45496	1.86394	-2.61937	0.559088	1.93274	-0.647788	0.338314	-0.596342	-3.58736	1.71671	-0.00295726	-1.76403	0.887278	-2.06388	2.00903	0.0202636	2.95368	2.93347	1.02333	3.45833	-1.96547	-1.89319	2.2412	1.08519	-1.89359	1.73018	1.30634	1.94768	-2.08358	1.25727	1.71792	-1.10217	-3.73528	-0.00641606	-0.124428	2.08418	-0.526482	0.487341	2.94652
lib230524_CATTCCGCAATTTCTC-1	1.66556	-1.77545	0.811168	-2.61602	-1.421	1.37916	0.860125	-3.37057	-0.926899	-1.78785	-2.34845	-5.3464	0.566977	-0.710494	0.832046	-0.923752	-0.658484	-1.79439	-1.46514	0.0972274	-0.616063	0.840241	-1.03153	0.937821	0.578242	-1.41561	-0.0747907	-0.883891	-2.6289	3.17152	-0.116948	0.480812	3.17476	0.254782	1.96629	1.64761	-1.69725	3.4317	-0.741294	0.643868	0.112695	3.58299	-2.07535	3.75592	1.60312	2.73271	-1.2251	-0.189544	-0.968726
lib230524_CATTCCGTCGCAGTTA-1	3.16683	-1.42425	1.90625	0.0689698	1.38458	1.22469	1.95307	-0.241636	-1.03341	1.16435	-0.565486	0.945728	0.797008	-0.866317	-0.963339	-2.30884	0.81315	-0.358337	-1.37015	0.833992	2.02637	1.74348	1.20488	1.51375	-1.29139	1.44415	-0.364164	-0.338927	1.73318	-0.941522	0.368639	-1.37213	-0.341648	-1.09879	0.0865385	-1.86249	-0.857247	-0.555785	-0.607131	0.786472	0.749651	0.248886	-0.458519	1.70245	-0.538734	-0.897029	-2.01344	0.159226	0.573207
lib230524_CATTGAGCAATTCTCT-1	2.89176	1.70098	1.06484	1.07586	-2.26852	-1.34406	1.55449	-1.78685	-0.235941	-2.29453	3.99316	1.30694	0.0013227	-0.587658	1.20916	-1.71417	0.920489	-1.78222	-2.39855	-1.52938	0.329969	1.21552	-2.75388	0.243381	-1.26995	1.92259	1.60795	1.56057	2.24941	0.0597981	0.455942	-3.65624	0.724597	2.36778	-1.29585	-2.55	0.585358	2.77209	-4.22593	-0.356057	0.756111	-2.06465	-2.21847	1.43577	-0.151871	-1.84297	1.77213	-3.48003	-0.299522
lib230524_CATTGAGGTCCAGCAC-1	-5.68712	-3.91031	-1.34164	-0.202755	-1.81255	-0.43365	0.345833	-2.6463	0.411332	-2.44292	-0.998853	-0.401048	-0.426921	1.43521	1.06208	-0.371327	0.428115	2.03416	0.661262	-1.92461	-1.05308	-0.557772	-0.715107	-1.21363	1.15113	-0.783066	-0.0179159	0.307293	-0.66449	-0.396641	-0.164892	-0.213887	-0.78932	0.3695	-0.531481	-0.582808	0.727682	-0.0320563	-1.72465	0.847413	-0.611433	-0.328153	1.09121	-1.1212	-0.297753	0.085743	-0.347382	0.150296	0.104305
lib230524_CATTGAGTCATTGCCC-1	1.0231	-0.475752	1.71445	1.50205	-0.219241	2.23728	3.64285	-2.1204	0.471024	-0.684226	-0.907163	-3.49909	1.42794	-2.34432	-0.798672	-0.673137	-1.2135	-0.493743	1.19934	-0.557588	-1.42432	-0.414181	-0.270627	-0.0352543	0.881146	0.773253	-1.05559	1.32842	2.08864	-0.554865	-0.418215	-0.471574	-0.537863	0.385618	0.180798	-0.270138	-0.57369	1.08848	-0.890234	-0.909343	-1.04531	-1.99033	2.6503	-1.1927	-0.324044	1.24387	0.926085	0.260709	-1.67256
lib230524_CATTGCCAGACTGGGT-1	4.06417	-0.667343	2.95705	0.998712	-3.01683	-1.07047	0.332313	-3.60703	-0.900944	0.219901	-0.407987	-1.73393	1.47517	0.340836	1.03808	-0.654797	1.11514	-2.72301	0.99573	3.62675	-0.624453	4.52528	1.4776	1.7698	-2.01632	-1.49244	2.2098	-1.29602	-0.980351	2.7527	-0.57746	0.815957	2.54232	-1.83985	1.39269	2.18149	-1.28578	2.27502	0.510332	1.19784	1.38674	1.44123	2.51711	0.0591947	1.62144	-0.37079	0.257556	-1.90062	0.370999
lib230524_CATTGCCTCTAGACCA-1	11.7703	-0.143352	7.14671	1.82115	2.42896	0.518251	4.83998	3.76931	2.41941	0.660918	3.1104	0.856665	3.93514	-3.40301	-0.0966414	3.74423	1.72013	-0.924141	1.47448	-0.863493	-4.56979	-1.97764	-1.05169	1.00963	-2.18513	-1.71561	-0.294814	1.90915	3.12205	-4.19605	0.024288	-0.515963	2.03115	-0.0709338	1.97792	-1.82795	3.43732	0.211934	4.27083	3.59903	-1.77871	-0.578307	-1.9234	-1.72949	2.25929	2.89826	-1.5893	-2.44367	-3.64857
lib230524_CATTTCACACTGGCGT-1	1.17295	-2.47875	0.630292	0.469602	1.82624	-0.71621	2.3474	0.230095	2.0765	0.492898	1.26817	-0.587939	0.604998	-1.53461	-0.754392	-3.00013	0.366639	0.823239	2.55739	-0.708509	-0.158489	1.55106	-0.813494	-0.670073	0.619468	-0.893425	0.366706	-0.765043	-0.628296	-2.60951	-0.768787	0.535041	-2.41341	0.373833	-0.768295	-2.72035	-0.891846	0.780134	0.842836	0.077132	-1.9161	-1.49974	0.48522	-0.014158	1.60886	0.236573	0.407517	0.144188	-0.727727
lib230524_CCAATTTTCAGCCCAG-1	2.24823	-0.786711	0.748806	1.9702	0.649214	2.06475	3.48311	-2.95937	2.27263	1.36473	-0.924014	-0.710938	2.28913	-0.128197	-1.58676	-1.12681	-1.23044	0.269029	0.141915	-0.476956	1.54557	1.69421	-1.03417	-0.639615	1.64571	-0.323209	1.17503	-0.79395	0.456162	1.53046	0.643021	0.776841	0.313107	-0.481646	-0.672777	-0.0521311	0.0690948	-0.599554	-0.984681	0.448256	-1.33698	1.46127	-0.622443	1.79567	-0.394978	0.518723	0.86249	-0.230627	1.65006
lib230524_CCAATTTTCAGTGTTG-1	-1.42535	-2.30465	1.45616	0.595239	1.18766	1.27748	2.41829	-2.26166	0.825564	0.053203	-1.75326	-2.19814	2.57178	-1.50825	1.39835	-3.32146	-0.963089	-0.379173	0.226608	1.05625	-0.636487	0.444159	0.350769	0.988694	-2.06732	0.570909	0.984459	0.247998	0.643178	0.504655	-0.444882	0.354039	1.02766	0.265311	1.12831	-1.61413	-0.409482	0.154583	-0.813568	2.02335	-0.306307	0.0251782	-0.317626	-0.786047	-0.454238	-1.05807	1.55189	0.374019	1.61504
lib230524_CCACAAATCTAGTTCT-1	14.924	2.76724	6.90736	6.2002	1.88571	1.76436	5.09099	2.55881	1.59437	0.0903271	2.99238	3.18371	2.30257	-1.46252	-0.199036	1.16374	0.698416	0.66091	1.76098	-0.856238	-2.66289	-0.898083	-0.963235	0.304787	0.0439348	1.84125	0.394583	1.64134	2.54931	-1.09965	0.253815	-3.49448	1.13979	1.06821	0.256922	0.61639	2.8487	0.044116	2.63516	0.376035	-0.0762104	-2.48518	-0.0370932	0.124325	-1.22549	0.274841	0.471348	-0.205165	0.453804
lib230524_CCACCATTCCACTGGG-1	1.63407	-2.24273	1.70906	0.69184	1.5729	0.152622	1.97492	-2.41483	1.48638	0.68796	-1.43215	-2.81026	1.44997	-1.95253	-0.843804	-1.37367	-1.53999	-0.22385	-0.664863	-0.55183	0.441902	0.828054	-2.20099	1.65666	-0.400693	-0.120314	-0.141748	0.954027	-0.656027	0.406645	0.48551	-2.53741	2.14179	-0.453684	1.38078	2.33088	0.806129	-0.633668	2.71126	-1.34437	1.08873	2.03113	-1.35552	0.196844	-3.03572	-1.97846	-0.546309	0.379566	0.225531
lib230524_CCACGTTGTCGCGGTT-1	0.661181	-1.07237	1.42592	0.157162	-2.36701	-2.48909	0.728435	-1.31551	0.104113	-0.122021	1.12172	0.000719048	-0.628724	-0.3255	0.594781	-1.83339	1.0084	-0.584994	0.545823	-0.859379	-0.475289	1.00779	-1.92017	-2.5528	-0.0200889	-1.03973	-0.377106	0.913177	2.15894	2.3156	1.0446	-4.25467	3.0334	0.289778	-0.923208	-2.03747	-0.656114	-0.407875	-0.196872	2.31975	0.271842	-0.682679	-0.999235	1.39279	-2.91025	0.177833	1.62115	-3.77976	-3.30209
lib230524_CCACGTTGTGCACAAG-1	6.78309	-2.60021	9.20528	0.345164	-5.02334	-6.0933	0.858555	-1.8209	0.543636	-0.267797	0.0319318	1.77971	0.385785	3.17917	2.01202	0.896638	0.517295	0.317415	-1.93907	0.635392	0.505767	-0.168743	-0.33385	-2.22382	-0.227802	-0.393662	0.732972	1.9983	-1.51304	1.36306	-0.71718	-1.5396	0.179893	-1.53434	-4.38351	0.975383	1.03993	-0.106695	-2.74264	-3.75393	1.10885	-0.293195	0.684232	-0.0440128	-1.14321	0.657879	-0.108842	1.28269	-2.1621
lib230524_CCACTTGAGTATCCTG-1	-1.04275	-3.72122	2.04271	2.85433	0.500377	3.22132	1.33006	-2.50506	1.30639	-0.386221	-1.63899	-1.62085	1.96303	-0.30734	-1.38193	-1.12591	-1.34206	-0.0930968	-0.366748	-1.35497	0.927724	0.00878994	0.85068	1.00372	-0.663324	0.0398331	1.09169	-0.143346	0.318789	0.188719	0.340568	-0.91459	0.366178	-0.350871	1.62154	1.62018	-0.867176	0.351477	0.348679	0.432569	0.354031	1.25905	-1.28994	0.265485	-0.393222	-0.795	0.00596831	2.01687	2.27752
lib230524_CCATAAGCATTCAGCA-1	1.06817	-3.18698	5.07617	1.63388	-2.09698	-2.87788	0.169455	-1.65982	-1.01009	-1.52098	0.677275	2.20236	1.69288	1.65753	-0.151132	-0.8741	-2.11556	0.584374	-0.437644	-1.26747	1.61503	0.160201	0.560769	-3.15531	0.306042	-0.2824	1.18481	1.16295	-0.545227	0.970713	1.15339	-1.78799	0.788209	1.41533	-1.75766	-0.518409	-2.1288	-1.49351	-1.33797	0.321114	1.61342	-0.0820419	-1.49863	-1.60996	-0.363013	-0.433351	-0.151433	-0.200488	-0.923629
lib230524_CCATCACGTCTGTGAT-1	-4.71489	-2.72212	-0.13796	0.828924	-1.08339	-1.20074	2.20969	-4.11778	1.80761	-0.979067	-1.70968	-1.10705	0.675106	-0.523873	-0.800081	-1.96849	-1.11063	-0.829073	0.211234	0.143958	0.0797196	2.93601	-1.30574	-0.553918	0.691166	-1.6419	0.619035	-0.628084	-0.334753	-1.61871	0.127352	0.826543	-0.0903	-1.09306	1.10557	-2.17832	-0.324638	-0.494675	-1.29066	1.83869	-0.365265	-0.09639	0.0572009	0.728002	-0.446869	1.10077	-2.6944	0.068758	-0.520117
lib230524_CCCATTGAGTGCCAGA-1	-2.25115	-3.46568	3.32858	1.66495	-2.02648	-0.581037	3.04529	-3.06208	0.640721	-0.898966	-1.02247	0.865276	0.794118	-0.0424191	-0.790329	0.136329	-0.109839	-0.615254	-0.146029	-0.221705	1.65526	0.595669	0.754153	-1.03797	0.343614	0.635991	-0.111371	0.51237	1.73855	-0.264152	1.34749	0.924617	-0.509548	1.48053	-1.10737	0.354007	-0.552916	-1.40004	0.580095	1.49458	0.063	0.494879	-0.492621	0.22132	-0.455022	0.888551	-0.683785	-0.0974487	0.310164
lib230524_CCCGAAGAGTCACTAC-1	2.62	-3.50604	8.30305	1.55017	-3.7127	-4.15876	0.794057	-2.2133	0.622827	-2.05343	2.16075	1.84591	0.287245	0.321382	-0.215676	0.164265	-1.30038	1.50678	-0.632752	-0.915463	0.619995	-0.658074	0.0473154	-0.0160041	1.38103	0.113235	0.336441	0.0237232	-0.129951	-0.284179	1.62743	0.521679	-0.112853	0.704265	0.120003	-0.320858	-0.208204	-0.449201	-0.0472014	-0.382894	0.148987	0.986486	-0.439449	-0.851071	0.181135	0.561121	0.338337	-1.43211	0.105284
lib230524_CCCGAAGCATAACTCG-1	3.75004	-1.42545	2.55092	3.83432	2.20718	3.34172	4.30309	-0.634309	3.4444	-0.597513	-1.40903	-2.23249	3.99117	-2.04916	-1.19041	-0.681863	-0.415962	-0.00270041	0.375896	-2.81583	0.227379	-0.9832	-0.691738	0.192001	-0.528827	-1.67226	-1.92385	-0.609058	0.932817	0.304493	1.68414	-2.40825	-0.64528	0.549787	2.82831	0.720163	-0.700611	1.32244	1.53545	1.66364	-1.2161	0.960194	0.817898	-1.60984	0.0243326	1.08824	-1.27282	0.691148	1.60517
lib230524_CCCGAAGTCATCAGTG-1	1.61905	-1.96564	-1.80592	0.122859	2.39585	0.469712	2.10651	-0.933915	1.69929	0.986986	-1.69812	0.877505	0.176971	-0.136125	-0.205082	-0.676573	-1.19043	1.0783	0.179647	-1.62838	0.994786	1.2705	0.232191	-1.23736	-0.99053	0.507528	1.6337	0.293899	0.758793	1.41717	-2.36407	1.46611	-1.96642	0.672577	0.231627	0.896277	-0.648122	1.75731	-0.726605	-2.16451	-0.182009	0.112236	0.157436	-0.877546	-2.28816	0.328258	0.0150657	0.746624	-1.5347
lib230524_CCCGGAAGTCATTGCA-1	-3.91138	-2.59871	-2.20466	1.36062	2.7373	-0.995009	1.4245	-0.735043	2.20819	2.60837	0.010966	-0.87831	-0.323533	0.936089	0.362667	-1.36538	1.46939	0.471053	0.862171	-1.06839	0.772748	0.540569	-0.146969	0.107739	0.659686	0.828295	1.33214	-3.95751	-0.853953	0.712897	-0.395491	0.309916	-0.919425	-0.0959574	-0.201308	-1.91644	-0.343787	2.40966	0.248883	-0.0184947	-2.15265	0.844831	-0.748525	-1.95411	-1.24958	0.268866	-0.541844	-1.02076	0.395224
lib230524_CCCTAACGTGCTCTTC-1	-6.55591	-3.10797	-0.145248	2.86232	-1.08345	-1.10006	-0.0256322	-2.77409	1.09384	-0.925302	-0.272233	-0.700017	-0.167341	-0.952769	0.731572	-1.41937	0.28359	0.858528	1.12437	-0.118821	1.38504	1.26304	-0.59437	-0.617496	1.03978	-0.890361	0.0969235	-0.398756	-0.188334	-1.75896	-0.0454741	0.386256	0.210006	0.176837	-0.766384	0.166266	-0.533146	-0.491197	0.829845	1.00893	-1.18471	0.163019	-0.345172	-0.731752	-0.865812	-1.14076	-0.364523	0.671059	0.0179603
lib230524_CCCTAACGTTTGGCTA-1	7.24892	-0.0150788	6.632	5.75335	0.663248	3.86545	4.92183	-2.34686	0.856622	1.01723	-1.47493	-0.0556366	1.93551	-2.65964	-1.36753	1.40674	1.07713	0.693229	2.49673	1.78888	0.047177	1.0499	-1.26512	3.37195	-2.38053	0.729985	1.30155	-1.45187	0.373303	0.296977	0.642895	1.5003	2.86671	1.08014	-0.956764	1.78678	1.33571	1.81586	2.36219	0.205024	0.482309	0.831216	2.571	0.400577	-3.05776	-1.78179	1.52406	-0.0654701	0.736318
lib230524_CCCTCTCAGCAGTACG-1	2.37468	-3.00903	2.77892	-0.739875	1.47525	-2.51248	2.15779	-1.938	-0.618691	1.37557	-1.32853	-0.810638	1.35029	0.533922	0.575053	-1.10048	-1.42872	-0.662643	0.666194	0.936871	-1.96232	1.67624	1.07823	-0.298662	1.74663	-0.791618	1.79232	0.648371	0.902933	-1.47046	1.79855	0.873351	0.901066	-1.36247	-2.0638	0.00957173	0.541561	1.83748	-0.209684	-1.95725	-3.86867	0.0121045	-2.79973	0.287661	-1.54296	-0.835609	0.842423	-0.212792	0.795061
lib230524_CCCTCTCAGCATCGAG-1	-1.58314	-2.65855	-0.281186	1.85355	2.8688	-0.411201	3.23162	0.079763	2.63026	0.700451	-1.00279	-0.942239	0.692017	-1.27494	-1.14943	-0.185151	-0.973358	-0.33472	2.15326	-0.677217	0.832763	2.00644	-0.243934	-0.102669	-0.496511	0.0107848	1.25384	-1.54658	0.205343	-1.96066	-0.50948	0.633899	-0.64638	0.324583	-1.80956	-1.63849	-0.970379	-0.315625	1.75563	0.114069	-1.92946	-0.3948	2.11138	-1.33948	1.28889	-1.09609	0.345172	0.975037	0.917065
lib230524_CCCTCTCAGCCGTTAT-1	7.67576	-0.682924	11.4113	1.9698	-1.75545	-8.54828	5.1871	-1.76684	0.356224	0.991609	3.36036	3.35941	-0.11192	3.00652	0.888562	5.63434	-1.04058	-0.485309	-0.0226349	-1.51624	-1.80481	0.895172	0.677981	4.04925	2.62257	0.200823	0.078941	-0.765107	-0.0965298	0.220587	-0.170295	2.68945	3.2629	-1.51674	0.241701	-0.475246	4.01603	-1.39437	-0.357443	0.526308	3.00662	-1.18862	3.04391	2.16549	4.33448	2.04533	0.848383	-3.03995	3.6946
lib230524_CCCTCTCCAAGTTTGC-1	7.65049	-0.487986	5.68981	3.69128	2.70753	0.962221	5.33119	0.210564	2.78957	1.46873	1.11315	-0.923666	0.577027	-0.801581	-0.11548	2.97254	0.357191	-0.28834	-0.710503	1.19356	-1.97374	2.28372	-3.38067	1.66938	-0.967978	-0.701768	2.57145	-3.82832	2.46868	0.0936653	2.7091	3.38511	0.972746	1.3983	-1.15567	-1.93183	0.971562	-2.36574	0.453192	2.66322	-1.73507	1.21545	-0.637554	-0.108668	-0.28346	1.45164	-4.69058	-0.887998	-0.178901
lib230524_CCCTCTCGTACGCGTC-1	7.27727	-1.34012	4.06455	2.26023	3.9077	-1.1042	6.04323	0.101639	2.04489	2.34676	1.81386	1.09253	1.42448	-1.74141	-0.425138	1.76375	-0.379138	-0.137465	-0.0517383	0.374705	-3.93323	3.10561	-1.89077	2.52235	-0.525717	-1.338	1.68678	-3.16619	1.60986	-0.545698	1.21483	5.14136	1.17736	0.539969	-0.853222	-2.03475	1.12193	-0.912444	-0.459397	2.28829	-1.46658	1.27987	-0.297082	1.19475	0.906018	1.43914	-0.439457	-1.62958	0.811061
lib230524_CCCTCTCTCGAGATAA-1	-3.75838	-2.53541	-1.8721	2.01241	-0.795044	0.62859	1.63605	-2.81161	1.57234	-1.01068	-0.110683	-0.349178	0.693813	0.567953	0.207648	-1.33568	-1.32231	-0.669777	0.539654	-2.16013	0.0324625	1.90255	2.10617	0.224993	1.09684	-2.24764	-0.653555	-0.170285	-1.05714	-0.760568	0.715801	-0.14912	-0.665297	1.15648	0.0244712	-0.315036	0.342267	-0.743113	-0.575526	1.6157	0.428383	0.55819	0.779567	-0.239045	0.0185006	0.767097	1.24786	-0.329447	-0.656531
lib230524_CCCTGATAGACAGCGT-1	0.00713482	-3.01699	6.38647	1.22534	-1.07574	-2.78046	3.20728	-2.55293	0.935524	-1.37291	1.33012	-0.338103	-0.626099	-1.01462	-0.563705	0.671704	-0.835255	0.00321877	-1.14278	1.78045	0.170252	-0.335163	0.459448	-0.410551	-1.38512	0.166489	1.00375	-0.398632	1.8888	0.908936	-0.551405	-0.0452448	0.586683	0.06856	-0.653064	-0.48826	-0.145431	1.79014	-0.297186	3.88978	-0.420036	1.69946	-1.69625	-0.627906	-0.634766	0.398723	-1.49592	2.1109	1.19672
lib230524_CCCTGATCAACAGATA-1	6.6619	-1.91482	7.07983	-0.148685	-3.18294	-1.4134	2.9511	-1.81597	0.00459682	-1.0959	-2.23951	0.504434	2.48496	1.05552	-0.435893	-1.4094	-0.357087	0.412517	-2.68987	0.728356	-3.83771	-1.15402	-0.0702008	1.59177	-0.0233858	-1.94948	-0.277369	5.11039	-0.0175417	1.81176	-0.842298	-4.48112	1.33037	1.1499	-3.73522	2.20193	0.915113	-1.59609	-5.22112	-2.77277	0.457616	-1.94581	3.37132	-1.19844	-0.956932	-1.67626	-1.29112	-3.42852	-2.60237
lib230524_CCCTGATCATACCACA-1	5.63059	-0.418135	0.876226	0.85855	1.62048	4.93136	4.97292	-1.12812	-0.120229	-0.222576	0.433177	-1.36379	2.13359	-1.18842	-1.08885	-1.03113	0.876626	0.946325	2.3951	-1.14025	-0.99294	1.98963	1.07258	-0.403946	-0.0188718	-1.15469	-0.983877	-0.213065	-0.327443	0.0399987	-1.91376	-1.01721	-1.18784	-0.101715	1.57522	0.530003	-1.9367	0.507624	0.67466	-0.0693386	0.634498	-2.26196	1.68019	1.90967	1.78104	0.575443	-0.837137	1.16408	0.399174
lib230524_CCGATGGCAAATCAGA-1	6.59198	-1.45919	4.14453	2.28836	1.04683	1.50099	3.33711	1.15888	0.239	0.486693	2.2731	0.195147	2.34898	0.210673	-0.669711	-0.263581	-1.63651	0.132485	1.5655	1.2079	-1.42069	-2.03429	0.16902	0.384792	-0.623415	-1.6955	1.90788	0.571823	1.68444	1.71347	-0.190549	0.0618285	-0.101126	0.360578	0.343255	-1.22468	1.09421	-0.640311	-0.193217	1.03557	-1.35066	-0.284869	0.214173	1.45066	-0.047362	-0.984809	0.633083	2.51984	-0.79707
lib230524_CCGATGGTCCGATAGT-1	-5.45138	-4.6569	0.587571	-0.566615	-1.6573	-0.844943	-0.490894	-2.84517	0.26355	-0.595067	-2.17896	-1.27366	0.311949	0.341624	0.0597178	-0.48709	0.279316	0.185246	-1.08691	0.247645	0.296151	1.06158	-0.194778	0.441075	0.522437	-1.08155	-0.834303	-0.926323	-1.05166	-0.752402	-0.00614078	0.151514	0.813701	-0.13122	-1.37733	1.08231	1.55874	0.216664	-0.472132	0.800695	-1.06235	-0.636448	0.364073	0.127542	0.200082	0.205692	0.264743	0.0195215	0.926184
lib230524_CCGCAAGGTATGCTAC-1	12.5488	0.0906465	7.13184	1.88412	4.99948	1.63405	5.77541	0.296016	-2.09143	1.70609	-1.03615	1.72959	2.15443	-1.81516	-1.33995	1.72799	2.97641	0.40982	1.84739	2.07997	-0.365261	-1.44104	0.370883	1.83399	-2.85516	1.68994	2.34842	-0.283213	1.20903	-0.613055	-0.119559	0.373446	-0.201865	-0.0303126	0.549822	1.3294	0.527959	1.71953	1.42864	0.878194	0.968101	0.11717	-0.828273	0.63768	-0.058965	-1.03166	-0.70025	1.26817	-2.45419
lib230524_CCGGTAGTCTGGAGAG-1	2.6737	-3.85523	7.69911	0.44489	-4.04863	-4.86569	1.50522	-1.48575	0.0746129	-1.72246	1.54666	1.57126	-0.0497975	1.74684	0.0549829	0.984878	-0.379814	2.4595	-1.57494	-1.26627	0.15283	-0.124716	-0.0366258	-1.87833	0.503052	-0.238633	-1.11868	0.068185	-0.306794	0.85574	-0.0614162	-0.504061	0.1718	0.625908	-0.69737	-2.24075	0.531224	-0.730579	-0.857308	-0.256308	0.09009	-0.532176	-0.772198	-0.0897728	1.13421	1.02813	-0.383608	-0.742644	0.0806253
lib230524_CCGTAGGCAGAGAGGG-1	5.50974	-3.53533	8.37807	-1.49524	-0.0909004	-3.43688	3.29027	-1.20195	0.485105	0.31491	-0.500501	1.12795	1.76279	2.64301	0.239134	0.840032	0.296396	0.307881	-1.08118	0.600713	0.911592	-2.42347	2.507	-1.74795	-1.50675	1.20961	0.314775	3.4419	3.55174	0.913378	1.77866	-3.77829	-1.38032	0.948139	0.162057	4.0629	-0.089154	-0.269121	-2.04803	-0.921658	1.59959	-1.002	-0.251374	-1.18369	0.225443	-0.0258522	0.891595	4.37166	-1.62351
lib230524_CCGTTCAGTAGACAGC-1	3.64118	-3.83276	5.06857	1.36791	1.37601	-0.543409	3.39136	-2.14436	0.926857	0.767531	-0.678245	-0.235463	-0.0170429	-1.22731	-0.360983	-0.318441	-0.565741	-1.61724	0.071775	0.571878	-1.75888	1.1097	-0.186392	0.113999	-0.504974	-2.8892	1.10936	-3.39949	0.916144	-0.917209	1.75984	3.42773	-0.402827	1.06396	-0.419497	-1.27413	-1.06798	-0.993495	-0.496878	2.58306	-2.52041	-0.243393	0.516966	-0.472609	-0.461598	0.906112	0.52721	-1.16998	-0.631235
lib230524_CCTAACCGTGAATAAC-1	8.19698	-1.51136	8.75098	2.09656	-2.59588	-5.5041	2.2133	0.575448	1.78285	-2.15108	3.28028	3.68293	-0.806269	-0.702487	-0.235831	-0.82235	1.62926	0.231715	-2.23532	0.614298	-2.40888	-3.96417	-1.66106	-0.564335	0.302077	-0.0185187	1.10068	1.00794	2.55224	1.18235	-2.31516	0.305475	3.46879	-0.377357	-3.86165	-0.443851	2.53904	-0.135713	-1.58334	0.0816426	0.609867	-2.4546	4.64683	-0.850138	0.993182	0.0149674	-0.726598	0.658487	5.22493
lib230524_CCTAAGACAGAGTCTT-1	3.73928	-0.300788	1.59215	0.69466	-1.75747	-2.06071	3.73867	1.40739	-1.09544	-1.90672	-0.499563	-1.11003	1.621	0.897052	0.262812	-1.0307	2.17401	2.06133	-1.95692	0.483107	-0.486576	-0.934175	-1.18635	0.43165	-0.0413202	0.579368	1.30235	2.75251	2.17082	1.95755	0.432937	-2.79883	0.311221	1.84535	-2.40006	1.32487	-2.75596	-0.184271	-1.15653	0.425417	1.72177	-0.813039	-1.5575	1.78961	-0.884423	-3.66139	0.674954	-2.05148	-1.30377
lib230524_CCTACGTTCGCCTATC-1	4.27284	-2.43343	4.69874	0.535835	2.44159	-1.85952	2.86806	-2.30739	-1.09132	-1.2804	0.697847	1.14512	1.77009	0.0660418	-0.918804	-0.830777	1.15187	1.38343	-2.10393	0.440957	0.257489	-1.28562	0.666762	-1.49631	-2.00906	2.73208	2.38229	-1.78104	2.51455	1.23478	-0.599381	-0.905737	2.2513	1.5874	1.89267	0.0849099	0.0986005	2.09871	3.72107	-0.134262	0.0456577	1.78705	-1.29378	-0.0974108	2.25359	3.4435	-0.718858	1.73855	-0.456423
lib230524_CCTATCGCACTGAGGA-1	3.32605	-0.267681	-1.31929	2.19851	5.21682	2.13618	3.59141	1.51402	1.8323	1.2376	-1.76039	-1.53137	0.937459	-0.481729	0.623529	-1.2495	-0.859221	-0.310811	0.0845575	-2.24085	-2.52089	1.48145	-0.322348	-0.454631	-0.771914	-0.674527	0.698591	0.735841	1.79005	1.82899	-0.764811	-0.0745291	0.278176	0.303507	0.55384	0.820344	0.292016	1.77416	-1.01903	-1.14126	-0.0234066	0.890422	-0.517885	0.413743	0.298407	2.98377	-0.929	2.17572	0.0710301
lib230524_CCTATCGCAGGTGAGT-1	-6.77814	-3.04182	-0.818034	0.993116	-0.731898	-0.13235	2.14339	-2.58148	0.349723	-1.93198	-0.077044	-1.23182	0.686845	-0.639202	-0.855109	-0.843437	-0.876607	-0.100175	2.23884	-0.797825	-1.33566	-0.266209	0.756183	-1.74321	1.0159	-0.999246	-0.267112	0.240543	-0.373929	-0.589771	0.75389	-0.0763883	0.138289	0.383029	-0.610215	-0.725665	-0.737802	-1.52752	-1.08507	-0.878711	-0.357465	0.584672	2.7862	-0.151329	-0.604814	0.880773	1.0407	0.554055	0.819956
lib230524_CCTCAACAGCTCAGAG-1	7.53122	-3.2144	8.05022	0.166125	0.0535295	-1.57565	3.06616	-1.041	-0.0730873	2.28084	-0.0643572	2.71062	2.57509	-0.169858	-0.603475	1.64958	-1.49907	-0.385608	-0.585053	1.40748	-2.07114	-1.65126	-0.559917	0.182191	-0.419331	0.853501	1.29575	1.87247	2.54923	-1.1446	1.81317	3.35184	-1.79679	-0.270882	1.19105	1.27046	2.37221	0.0775758	-0.0998257	1.65143	0.516973	2.50899	1.52068	-0.856932	0.362044	1.94762	-1.10314	-2.52669	0.665159
lib230524_CCTCCAAGTGCCCAGT-1	6.96438	-0.291868	5.4274	3.01601	3.13465	-1.78201	5.06634	-0.352968	1.70219	2.43233	1.65074	0.508547	0.188827	-1.40921	-0.157955	0.462704	0.84366	-2.16034	1.00522	2.36899	-2.23628	0.578045	-1.78643	3.0171	-1.6333	-0.925253	2.53591	-2.556	0.395897	-2.58827	1.06578	3.98612	1.31416	-1.05109	0.191864	-3.95493	2.16051	-2.4618	-0.76491	3.64113	-1.29622	-0.629894	0.550784	-0.65062	1.18788	3.16618	-0.963831	-0.693119	-2.67111
lib230524_CCTCCAATCTGTAACG-1	0.133536	-4.44275	6.31335	1.20788	-3.39976	-2.57646	2.07468	-3.4448	0.612593	-2.35542	0.878173	1.32782	2.01553	0.840974	-0.622606	0.282738	-2.10757	0.793454	-1.33197	-0.724456	1.10091	-0.3009	-1.16287	-0.251428	0.863502	-0.260228	1.12945	-0.0541034	0.870467	-0.285551	2.90096	0.80983	-0.547819	1.41331	-0.345546	-0.367206	-0.149456	-1.5518	-1.60527	1.12848	0.693723	1.01303	-1.14934	0.0508904	0.575375	0.681232	-0.294982	0.145029	1.78239
lib230524_CCTCCTCCAAATGATG-1	-2.17412	-2.83513	-2.20328	1.80595	2.8725	-0.427692	2.54905	0.254033	2.09019	0.650931	-0.0276057	0.176164	1.21663	0.284907	-0.636595	-0.18894	-0.238404	0.778121	1.08444	-0.614222	-0.137184	1.05931	0.490656	-0.574485	0.318044	-0.00497349	1.02854	-1.36481	0.183082	0.964321	-0.778497	0.759096	-0.625388	0.418557	0.111596	-1.03476	0.206496	0.59154	0.854693	0.475576	-1.07065	0.949878	-0.139154	-0.928508	-0.0972237	1.04391	0.444518	-0.232848	-0.582948
lib230524_CCTCTCCGTCCTATAG-1	-6.5407	-0.476122	-2.77779	2.25941	-2.60606	1.70496	1.25815	-1.66544	0.734234	0.767834	1.11414	2.38773	-1.42489	-0.523036	0.792912	-0.578254	-0.200521	-0.652181	1.82961	0.349403	-0.868908	1.98917	2.55943	0.0086518	0.0851694	-0.76902	0.449706	-0.978942	-0.589579	0.750914	0.713832	1.06555	-0.168121	0.273429	0.605107	-1.74259	-0.0325383	-0.259642	-1.53684	1.26609	-1.75038	0.562494	-0.36714	-0.101212	-0.452365	-0.968221	-0.822688	-0.371309	-1.14919
lib230524_CCTGCATCAAGTCATC-1	3.74911	-1.00535	2.45361	1.9067	2.13227	2.43035	3.63968	0.40047	1.89024	-0.67341	0.358734	-2.48135	1.18457	-1.47696	-1.13541	-0.421091	-2.15401	-0.358507	2.70134	-1.03085	-2.05508	0.991855	1.76414	-0.909024	-0.981385	2.76062	-1.13473	0.961839	-0.954551	1.05737	-2.20431	0.0769026	-0.364801	-0.256328	0.317455	-1.52985	-2.37983	0.48201	-1.19132	-2.32033	-1.41533	0.133837	3.39989	-0.686446	2.13897	0.778903	-1.80563	0.0655811	0.106871
lib230524_CCTGCATCACACTGGC-1	-1.98911	-1.85464	-0.423731	2.87645	3.20565	2.87334	3.87738	-0.563867	0.321229	-0.768114	-2.99838	-1.48601	0.146556	0.993409	0.0451411	-2.04935	0.360152	2.36896	0.314507	-2.8954	-0.262177	-1.7118	0.875889	-0.770655	1.39425	-3.30326	0.553358	-1.25211	0.510674	2.11096	-1.03561	-2.37492	-2.6443	0.119135	-0.687827	2.80605	1.35738	-1.40318	1.43776	-1.49127	-1.99284	0.981998	-0.88965	-0.0239983	-0.419264	0.867111	-2.23919	3.0803	1.9763
lib230524_CCTGTTGCATGTGACT-1	-0.856454	-3.41438	3.17917	0.999857	-1.32777	-0.0337869	3.88163	-3.47946	0.27474	0.186967	-1.37454	0.923935	2.11924	-0.990165	-0.64696	0.466693	-0.233558	1.35313	-0.542182	-0.27643	-1.61631	0.513945	-0.998077	1.67038	0.36623	-1.19894	-0.332957	-2.01113	-0.457477	-0.947353	1.72667	2.35488	-0.732821	0.0966895	-0.9646	-1.15856	-0.391292	-1.62947	-0.847434	1.86488	-1.87138	-1.0018	1.00701	0.808132	-0.91715	0.169455	-0.944989	-0.67875	1.20491
lib230524_CCTTGTGCATTGTAGC-1	-2.61535	-1.94645	-0.399708	0.494701	-1.04315	2.12118	1.37667	-2.75928	0.571976	-0.700131	-1.68273	-0.956484	0.605897	-0.139247	-0.87568	-0.704044	1.61357	-0.703772	-1.26671	3.42756	1.77614	-0.153002	0.658854	0.747215	-0.26576	0.780886	-0.0658701	0.424554	-0.0191062	0.435575	1.29058	0.996827	1.03388	1.04987	-0.62083	0.968832	-1.03113	-1.1713	2.38885	-1.45698	1.63783	-0.584688	0.126346	0.823446	-0.294291	0.0317029	-0.501127	-0.125917	0.806991
lib230524_CCTTGTGGTGTGAGCA-1	8.60938	-0.318142	1.21517	-3.66755	1.26449	0.883565	2.37042	-2.0369	-1.02294	2.84435	0.218605	-0.848126	0.223033	0.342969	1.84093	-5.62255	-2.17408	-0.798246	0.94499	-2.6253	-0.650651	2.59132	1.07301	0.201691	-1.44639	-2.30437	5.04295	-1.71574	-5.55147	4.74453	-7.97877	1.64166	7.21021	-3.46671	3.97127	5.66864	0.519867	4.88589	-0.408267	-3.49158	-5.03816	2.43507	-1.55015	3.83348	-4.78161	5.46657	-5.43978	-5.40726	-2.77998
lib230524_CGAAGGAAGCTAATGA-1	-3.49798	-3.0568	0.170212	1.03324	1.09496	-1.52465	2.32699	-2.70377	2.11552	-0.978773	-1.43908	-0.438981	1.13066	0.636534	-0.926616	-2.1524	-1.24566	-0.568997	-0.306817	-2.29741	-0.829828	-0.539703	-0.0921262	-0.126	-0.676183	-0.847601	1.11975	-0.179472	1.3152	-0.282191	0.914445	0.940825	-1.07297	-1.01354	0.579997	-1.15673	1.36823	0.135555	0.469514	-0.728716	0.529763	1.16027	1.78914	-2.20721	-0.914383	-0.211655	-0.227075	0.211498	-0.16208
lib230524_CGAAGGAAGGCTGGAT-1	3.92001	-2.33943	3.73737	0.77089	0.017042	1.43067	3.03484	-1.671	2.43296	-1.32849	-1.42783	-2.77939	1.27134	-1.86788	-0.459255	-2.45751	0.22601	1.30481	2.60135	0.0623584	-1.53531	1.11337	-0.577582	-1.9719	0.665691	-0.82155	-0.323236	0.422443	0.471646	1.34258	-0.106684	-1.02107	-0.272337	0.526479	1.95162	0.938386	-3.87654	-1.47699	-2.08534	2.47628	-1.41251	-0.498496	3.6005	0.931174	-0.600982	-1.2205	1.28178	-2.64094	-1.36543
lib230524_CGAAGGATCCCTGGTT-1	5.74234	0.287071	2.33328	-0.583633	-2.90344	-2.08686	2.35508	0.758579	-0.285939	-1.82435	1.22846	0.748748	2.22076	-1.77009	-1.5714	-2.00819	-0.131237	1.57083	-2.05291	0.857034	1.8128	0.993007	0.281897	-0.241793	-2.06253	-0.372945	0.603172	1.6289	2.20952	1.8367	1.06376	-3.98725	1.82853	3.07111	-2.76102	-0.662796	2.25176	2.19029	-2.82593	-1.07024	2.06702	0.0590237	-0.0526204	1.14509	-0.0535845	-0.69805	-1.41066	-3.02539	-2.70461
lib230524_CGAAGTTCATTCGATG-1	0.0937131	-3.42833	2.19912	0.66663	-0.421645	0.148162	3.22702	-3.32399	0.384209	-1.19095	-0.412793	0.268447	1.06251	-0.228977	-0.054782	-2.30165	0.528648	2.02195	0.877592	-0.857343	-0.618996	1.3065	-0.0662609	-0.421566	-0.609251	-0.465244	-0.632836	-0.137366	-0.908822	-0.38142	2.45134	2.22778	-2.20835	0.467939	-0.790706	0.213936	0.245399	-0.0985489	-1.3032	0.711975	-0.656367	-0.608458	-1.34214	1.36624	-0.617075	1.10359	1.21652	1.02572	1.11758
lib230524_CGAGAAGGTTTATGCG-1	-4.5878	-4.08433	0.320403	-0.661669	0.0244884	-1.84112	0.432715	-1.75639	1.07248	-0.635636	-0.957797	-0.267206	0.853251	0.602858	0.418772	-1.10859	-1.66774	0.541662	-0.211503	-1.91582	-1.0211	-0.526477	-0.468256	-0.682238	-0.0883717	-0.597246	0.467581	0.743473	0.612545	1.23548	1.30905	-0.305286	1.00558	1.49772	0.566079	-0.174757	-0.639142	-0.637336	0.647957	1.77328	-0.327066	-0.714725	-0.589404	0.397187	-0.69844	0.187364	1.67444	0.194028	-0.54267
lib230524_CGAGTTACATCAACCA-1	4.33231	-1.81916	10.4981	2.80313	-4.12224	-10.6046	2.75384	-4.15636	1.57417	-1.64896	2.62504	4.62212	2.51521	5.21581	0.409581	1.39996	-1.79914	-0.762236	-3.10896	-0.761703	2.61416	1.51196	2.12156	-3.45138	0.662271	0.777056	-1.22986	1.35034	-1.39172	0.0675488	-0.37508	1.2494	-0.361841	1.36775	-1.16929	-0.880456	-2.0579	0.700749	1.78039	-2.14539	-0.882359	-0.161887	0.359826	0.247009	2.50738	0.318433	-1.29348	0.445881	1.65466
lib230524_CGAGTTACATGTGGTT-1	-5.48137	-3.98676	-0.283009	0.147365	-0.439215	-0.820632	0.580357	-1.85542	1.20332	-1.66482	-0.646387	-0.893349	0.486882	-0.949143	-0.81514	-1.12701	-0.184035	0.44522	1.61367	-1.47227	-1.16418	0.310262	0.807369	-0.447164	1.11783	-1.01878	-1.00485	-0.125005	-0.918286	-0.303362	-0.668848	0.670284	-0.834445	-0.916858	-0.264381	-1.17682	0.706862	-0.083826	0.0451153	0.0217081	-1.11065	0.109698	1.30625	-0.690841	-0.165205	-0.0492963	0.368914	0.519343	0.075961
lib230524_CGAGTTAGTCGGTGAA-1	3.85246	-2.49901	4.6043	0.862801	-0.642502	1.68329	1.69074	-1.2079	0.296932	0.00253303	-1.40816	-0.319714	2.6668	-1.24735	-0.698837	-0.0993851	0.981162	0.178176	0.655764	0.839234	-0.521066	-1.96539	-2.08374	-0.726464	-2.42485	-1.10446	1.63867	-0.203252	2.65837	1.34572	2.68396	-2.18861	2.66439	0.154103	0.142442	1.85786	0.850989	-1.14821	2.12262	0.807818	1.58178	0.647121	-0.0899921	-0.29743	-1.43744	0.363901	0.629317	-1.37915	-1.63897
lib230524_CGATCGGAGCACCGTC-1	1.41384	-0.233751	1.97367	1.57033	-4.53352	-0.315924	1.45699	-3.93363	-1.6845	-0.865224	-0.98794	-0.916851	0.723575	0.174645	0.351239	-1.59433	-0.225043	-1.79225	0.00251581	0.64199	0.492109	4.95606	0.540366	-1.45274	-0.609337	0.0843645	1.29923	1.66873	-2.48871	0.653157	-2.95009	0.15465	-0.441969	1.5009	-0.271984	0.43868	-1.3008	0.239986	-2.37466	1.28849	-0.304699	0.323554	0.310208	-0.291035	-0.501239	1.2086	-2.18249	-1.80381	-0.665817
lib230524_CGATCGGCAGCTTTGA-1	4.06298	-2.74667	1.76919	-0.296393	4.92654	0.242275	2.68581	-0.548835	2.76096	2.10914	-0.561852	-2.07277	2.94793	-1.49824	-1.06416	-2.25627	-0.119681	1.6858	-0.390257	0.421537	-1.24091	-0.87697	-0.181711	-0.272016	-2.15302	2.15496	1.84244	-0.641013	1.25179	-0.108204	-0.0379664	1.64368	-1.84387	0.0143465	0.252403	-1.93903	-0.337566	2.37051	-0.277361	-2.27681	-2.45254	0.945428	0.685131	-1.45031	-0.444562	0.378598	1.97999	1.29004	1.03675
lib230524_CGATCGGGTAGGCTGA-1	7.33213	-0.370566	5.58174	1.7762	2.75049	-3.98916	1.89651	1.3313	1.78384	1.01167	0.880687	2.04041	0.280625	3.4082	0.728624	0.408707	-1.15488	1.46039	-0.775345	-3.55439	-0.155202	-0.490468	0.978519	-2.2835	0.207783	-1.26911	2.13333	-0.425451	2.61978	2.00862	-0.398491	-1.15675	-3.09795	0.976917	2.2936	0.304766	-0.0458652	0.6276	0.477962	-1.14814	0.55113	0.461178	-1.28544	-0.692844	1.59583	-0.708753	1.78723	0.516323	0.412586
lib230524_CGCAGGTAGACGGAAA-1	9.1643	-0.0435023	2.63313	-0.186911	2.25114	1.90048	4.25151	-1.67259	0.459578	-3.70491	1.92908	-1.81708	0.997116	-2.22713	-0.875211	0.23214	-1.39992	-0.427992	5.63527	0.0858872	-1.58389	-0.0720031	0.60977	-1.40191	1.0252	-2.1031	-3.9749	2.58972	-1.60888	1.10282	-2.81436	-2.44587	1.22794	1.23263	1.45452	-0.00942827	-3.65626	-2.29975	-3.54342	1.59434	-3.79207	-0.624878	6.10145	-1.86701	1.77866	3.93367	1.38259	-1.38234	-3.12768
lib230524_CGCATAAAGTGTTCCA-1	0.990635	-3.0155	4.97942	1.43464	1.46498	-1.05036	3.48528	-0.4607	2.04933	0.694967	-0.486061	-0.812523	0.803363	0.000932106	-0.518912	0.823452	0.492989	-0.545353	-0.469017	-0.0409568	-1.6469	1.32443	-1.76063	2.1043	1.37335	0.471311	2.10535	-0.884707	1.77403	-1.38518	1.96192	3.40326	-0.194151	-1.52483	-0.766491	-0.739023	2.64866	-0.0332545	0.132202	1.97477	-0.0778127	0.865831	0.0415553	1.19922	1.27515	-0.426153	-0.0941775	-1.96675	-1.92224
lib230524_CGCCAGACATGAGGGT-1	-0.393143	-1.51532	1.88586	-0.0478193	-0.149013	2.13514	3.30959	-3.70454	-1.8284	-1.95524	-1.04657	-0.92274	2.11423	0.15101	0.523527	-0.479394	0.624644	-1.97196	0.886935	-1.05093	1.33166	0.3479	0.380404	0.413592	-1.77915	1.52391	1.01413	-0.762067	-1.08825	1.79761	-0.156221	-0.892427	1.37776	0.653514	1.04685	1.63283	-1.91649	2.18085	1.85263	1.00041	1.32835	0.540068	2.23121	-0.340373	-3.05837	-2.02417	0.468008	1.10401	0.482164
lib230524_CGCCAGATCACTCTTA-1	2.63213	-0.769949	2.93361	0.00149374	-1.86928	-0.917301	2.2664	1.46096	-1.6826	-0.23113	2.03331	-0.106712	1.31373	-0.397924	-0.0555199	-0.818996	0.820293	1.54204	-3.03873	-0.343784	-0.476678	-0.597593	-1.19933	2.02144	-1.76922	-0.43206	1.73339	1.82541	1.52198	1.63208	0.97131	-1.81746	1.80234	1.49886	-1.43362	-0.592815	-2.30694	-0.913558	-0.704026	1.25134	0.918164	-2.29885	-1.03149	0.031332	0.380966	-1.09709	2.38479	-1.61565	-0.627794
lib230524_CGGAATTCAAACGGCA-1	4.94269	-2.69532	9.16363	2.59531	-3.85452	-3.3806	-0.164232	-0.608024	0.630775	0.870457	0.290733	3.76446	3.24389	2.63542	-0.355125	0.519964	-0.242087	0.796239	-2.12256	-0.117725	1.1853	-1.00116	1.23982	-1.9002	-0.451376	0.60175	-0.0194181	-0.33544	0.834121	1.68105	-0.0260443	3.93692	-0.455252	-1.16113	-1.99186	1.58541	1.40375	-0.555372	0.807042	3.34606	2.46743	1.69253	0.837654	-1.88352	0.665192	-0.597841	-0.278787	0.0462744	1.86694
lib230524_CGGACACAGGTATCTC-1	5.27445	-1.79516	4.80341	2.26954	0.187365	-0.296018	5.28333	-1.94267	-2.96253	1.65081	2.22729	0.385506	0.447473	-0.224172	-0.283005	4.60166	-1.20096	1.22766	0.322243	1.99502	0.451772	-0.148114	0.620181	2.17145	-0.628939	2.98006	2.53933	0.676812	-0.179721	2.41917	1.87909	1.96494	-1.33204	-3.31637	-1.72477	2.50676	3.79171	0.516267	-3.23731	2.09686	5.19035	-0.625267	0.776734	3.15636	-2.23075	3.67332	2.54894	0.781937	2.89685
lib230524_CGGCAGTTCCCAAGCG-1	0.816089	-2.35936	2.8416	2.67963	0.0355527	2.07158	2.31016	-2.47152	0.63402	-0.526762	-0.0443794	-1.44745	0.52313	-0.59649	-0.159261	-0.449044	-0.00110134	-1.12337	0.338297	-1.02574	0.00310401	-0.53142	-0.977157	1.81871	-1.32647	-0.604113	1.41002	-1.52224	0.420315	-1.82871	-0.0683877	0.480034	-1.61575	-1.69316	-0.311418	-1.03807	0.458071	0.368261	-1.13087	-0.616072	-1.23034	-0.820908	0.656303	-0.281378	1.19668	1.08093	2.36266	-0.518491	1.52226
lib230524_CGGGCATAGCCTTTGA-1	-0.849935	-2.4839	-0.215811	1.35981	0.0979807	2.0841	0.933491	-1.60248	0.414029	-0.334975	-0.692665	-1.17174	2.02756	-0.386098	-0.950258	-2.1248	-0.351283	0.760937	-0.184467	2.44117	2.5273	-1.24872	1.45944	0.720688	1.00712	0.912039	-0.770133	0.163042	0.60388	-0.357614	0.461308	-1.05339	1.0634	-1.32793	-1.6248	0.290074	-0.255799	-0.0967621	0.941763	-0.814983	-1.08497	-0.223532	-3.54029	-0.285757	-0.146586	-1.18753	-0.559981	-1.94157	1.55035
lib230524_CGGGCATCACTAGAGG-1	-6.52709	-2.8612	-0.363078	0.00380339	-1.40912	0.32367	0.267234	-2.92663	0.628881	-1.15061	-0.955135	-0.642799	0.591689	-0.630371	-0.450245	-0.735801	-0.975701	0.182407	-0.139678	-0.654404	-1.51052	-0.0132865	-0.48607	-1.03412	1.20213	-0.675697	0.0422944	-0.315872	-0.0187369	-0.489854	0.098017	0.491617	-0.059029	0.728146	-0.848693	-0.317128	0.25901	-0.98484	-0.213894	0.46494	-1.26642	0.715529	0.522435	-0.118544	-0.299951	-0.879919	-0.71089	0.667589	-0.373851
lib230524_CGGGCATGTAGTGCGA-1	-5.65116	-4.01722	-0.933815	0.328706	-0.337655	-1.55425	-0.24221	-1.29142	0.326395	-0.786404	-0.643284	0.496848	-0.151536	1.03598	0.381228	0.10424	1.08994	1.28199	1.25605	0.715543	-0.442962	0.72562	-0.553878	-0.360378	1.05936	-0.369123	0.334521	0.220564	-0.15096	0.675243	0.351532	-0.615678	-0.415163	0.183884	-1.34111	0.357229	-0.309418	0.142761	-0.0238795	0.363485	-1.24195	-0.102601	-0.0220503	-0.43148	0.311693	-0.619836	-0.565169	0.130423	-0.404846
lib230524_CGGGCATTCTGGTCAA-1	6.20544	-3.62904	9.72098	0.362334	-2.47021	-2.45248	-0.021434	-0.558375	0.535224	0.633856	1.4617	1.93885	0.0819688	0.762465	-0.16991	0.997306	-0.182157	0.649734	-1.43427	-0.33354	-0.214031	-1.58509	-0.130462	-2.56571	-0.0214914	0.410533	0.577841	2.1305	1.19013	-0.708609	0.936777	1.58519	-0.342281	0.0791345	-2.11486	-0.442305	1.35251	0.657453	0.297836	0.212026	3.36273	-0.225327	-2.73149	0.187268	0.153776	-0.243032	-0.771236	1.32927	0.81397
lib230524_CGTAATGCAATAGTGA-1	2.79265	-0.633439	0.349517	-2.99662	0.426453	1.23822	-1.82758	-2.09474	0.109769	0.617174	-0.731357	-1.5855	3.09035	-2.72998	0.0781288	-2.99692	0.637417	-0.364432	-0.911579	0.4271	-2.37234	-1.00018	1.44303	-1.06767	-1.32853	0.452764	1.18337	0.758971	-4.14658	4.21887	-4.41147	-1.8736	2.59168	-1.43841	0.417412	4.07903	1.10459	5.17663	-0.0872235	0.120444	-0.296117	5.07683	-1.18048	1.39979	-4.12104	2.34798	-0.99415	1.66934	1.25635
lib230524_CGTAATGTCTAACACG-1	1.60732	-2.3073	5.23741	-0.0308112	-3.9467	-11.1925	-1.83222	-2.27935	1.22487	-1.36522	3.6677	2.02764	0.879657	5.12224	0.0728401	1.66803	-3.33083	0.293843	-3.18856	-1.00047	2.63724	3.53836	-0.583163	-1.07216	-0.328222	-0.710751	-2.0195	-2.31533	-4.21094	-2.38359	-0.150399	-0.341139	-1.54193	2.03444	2.62253	-2.18537	-3.99439	3.27791	6.11523	-1.79239	-5.0692	1.21114	0.875241	-0.299842	-3.94116	-2.77138	-3.17544	1.5556	-6.01058
lib230524_CGTAATGTCTTGTGCC-1	-2.10415	-4.19255	0.356661	0.474989	1.80817	-0.648781	0.900878	-1.24308	1.38377	-0.744066	-0.292136	-0.30831	1.18947	-1.04389	-0.74522	-1.25378	-0.365036	0.951196	1.08667	-1.12312	-0.050294	0.81003	0.466867	0.0137007	1.02116	1.15202	-0.107933	-0.308709	-0.608754	-0.985645	-1.23444	0.251286	-0.167374	-1.51734	-0.289784	-0.599617	0.1379	1.49254	-0.131733	-0.822984	-0.244983	0.233315	0.977716	-0.443575	0.292545	0.249472	1.26167	-1.31538	0.668068
lib230524_CGTAGTATCAATCTTC-1	4.64266	-2.16563	1.65589	0.276799	-1.21739	1.10457	3.98028	-2.79313	1.85433	-1.44184	-0.523569	-4.04617	2.05052	-0.918772	0.0486098	-0.866872	-0.657094	0.343827	1.90052	-1.2373	-3.36409	-0.990628	0.250185	-0.674433	0.119094	-2.68029	-1.71111	3.12955	-0.760215	-0.119791	0.520014	-3.38553	1.51462	3.08433	2.44911	-0.619108	-0.432675	0.51691	-1.18263	-2.6401	0.46682	-1.09119	1.90618	-0.742048	-2.1978	-0.941145	-1.7461	-1.5522	1.47037
lib230524_CGTAGTATCACTACGA-1	6.93104	-1.72821	5.98924	1.81717	1.2946	0.715375	5.61388	-0.435562	2.89314	1.12079	0.578404	0.996346	1.69715	-1.93077	-0.854592	0.317049	-0.749477	-1.09302	1.42123	0.48055	-2.6377	2.09431	-1.05844	2.281	1.04033	-0.742511	1.27233	-1.62105	1.44591	-1.67776	0.51347	3.703	1.23227	0.289984	0.273757	-1.86108	-0.245115	-0.747911	-1.51447	3.15756	-1.32128	1.34129	-0.773349	-0.605755	0.286941	2.53442	-0.643704	-0.58406	1.82306
lib230524_CGTGATAAGTGGACTG-1	11.2882	-2.02475	9.78126	-0.198118	0.916664	1.35316	2.90968	2.06142	1.13968	1.41652	0.167275	-0.836801	4.24357	-0.348006	-1.17961	2.10131	0.578918	0.870179	2.73621	1.10301	-2.73717	-2.59873	-0.492815	1.18439	-1.61042	0.710117	1.77641	0.675867	-1.44953	-3.08717	3.09281	-1.46435	0.42084	-2.03932	1.17154	0.112779	1.86791	0.298174	3.75243	2.65597	0.101175	1.13687	0.187377	-1.75576	1.85412	0.348807	-1.99769	-1.70395	-3.90563
lib230524_CGTGATAGTCGCGTTG-1	-2.62075	-3.93123	0.663249	0.503092	1.15241	-1.28227	0.835375	-1.54701	-0.151713	-1.30668	-0.701069	-1.95257	-0.771664	-1.80324	-0.156931	-2.08599	0.776866	0.685226	-1.16443	0.290567	-0.476494	-0.0375403	-0.610875	1.42928	0.840994	0.0429884	-1.10405	-1.00951	-0.195449	1.1307	1.40098	-0.321941	0.923176	-0.370545	0.183936	1.14628	1.38675	-0.580933	-0.425903	0.316258	0.690736	-0.151096	-1.70776	0.700867	-1.89208	-1.14619	-0.995854	0.712409	-0.888287
lib230524_CGTTAGAAGAGAGCAA-1	3.63051	-3.12326	5.9415	1.09595	0.294203	-2.13404	2.90168	-2.18771	-1.14884	-0.723744	-1.72414	2.38999	1.26068	1.52144	0.433182	-1.12984	-2.2488	1.0859	0.653419	-0.491965	-0.718743	-2.30619	0.704255	-1.6266	-1.05401	0.930266	0.648476	-0.169481	1.61973	0.284012	-0.875311	1.43459	-0.965697	2.3849	1.15233	-1.3885	-0.268951	-0.838071	2.18516	1.07389	-0.833441	1.75379	-0.206938	-0.668575	-0.795937	1.83375	-0.904469	1.1666	-0.747074
lib230524_CGTTCTGCATGGCACC-1	-1.32412	-2.65808	0.592152	0.419817	0.221579	0.685489	1.94849	-1.87002	0.448929	-1.24532	-0.0880306	-0.163847	1.78211	-1.50653	-1.2429	-1.78815	0.132874	0.789226	0.569698	0.826423	-0.0597172	-0.460971	-0.442666	-1.38298	-0.551703	-1.14905	0.171476	-0.354458	0.345952	0.180257	1.06717	-1.2826	1.36718	0.326858	-0.777511	0.315565	-0.983189	-0.355651	0.857151	0.0865211	-1.50315	-1.05302	-1.45422	1.78097	-1.33141	-0.0968475	0.279196	-0.839713	-0.130345
lib230524_CGTTGGGAGGTATAGT-1	0.863785	-3.65561	7.58147	-0.211895	-3.1006	-2.95245	2.39914	-2.87919	0.268132	-1.88614	0.714427	2.16486	2.10699	1.80313	-0.619512	-0.0367257	-0.756956	1.35382	-0.488794	-1.63551	0.233579	0.913712	-0.793999	-0.917367	0.29881	-0.502011	0.919537	0.539963	1.01478	-0.833328	1.01116	0.510816	-0.954053	0.858317	-0.583876	-0.228074	0.0673499	0.072457	0.75498	0.720941	0.734023	0.934182	-2.15563	0.426298	1.13175	0.785791	-1.46367	-0.514961	-0.342185
lib230524_CGTTGGGGTTCTCACC-1	8.49845	-1.37433	5.62026	1.71273	1.63477	-0.980582	5.51529	-0.701188	1.07004	4.00484	1.27611	0.544703	1.50875	-1.04143	-0.230043	1.98022	1.75509	-1.83994	1.29933	3.94177	-3.4331	2.08753	-1.53081	3.141	-2.91199	1.25244	2.38513	-2.69353	1.45766	0.581478	1.8957	4.70224	-0.611131	2.02981	-1.33284	-2.07942	-0.0116611	-3.36594	-1.25602	-0.0595919	-2.04136	-0.0853011	1.31791	-2.50488	-1.72164	0.990039	-1.77588	0.736556	0.655467
lib230524_CTAACCCCAATTTCTC-1	-12.2742	8.19705	6.20817	-3.8559	0.748535	-2.1798	-0.32806	-2.86056	0.912315	-0.943725	-1.07415	0.184227	0.9157	0.0890477	3.30368	0.828748	-0.915162	-5.16479	4.15341	-4.84412	1.76215	1.09917	-3.12332	0.758751	-1.71364	2.62935	-1.25975	1.85666	-1.09754	-2.22736	3.2734	0.313053	0.686648	-0.87739	0.731411	1.50748	0.142219	0.237085	0.34284	-1.25348	-1.22869	-3.12999	2.91434	-0.284288	1.15286	1.37492	-0.00426228	-0.897064	0.501691
lib230524_CTAACCCCATGACTGT-1	5.19516	-2.93718	2.06989	-2.97947	-0.424765	-0.65308	-2.1018	-0.336902	0.766362	1.04631	0.0377487	-1.53774	2.37106	-1.26801	-0.0797916	-3.3702	-0.669516	-0.459802	-1.72816	1.34184	1.15245	0.685335	1.34608	0.100092	-1.11566	1.85354	2.78673	1.17932	0.321573	0.203246	-1.46041	0.589467	-0.714659	-1.15541	-0.888543	-1.05835	-1.69008	-2.23309	-2.66155	-0.470924	-0.197073	1.36632	-3.01242	-0.624454	-0.41753	-0.849239	-1.59872	-0.133185	3.63578
lib230524_CTAACTTCAGGTTTAC-1	1.0737	-1.80087	-0.0183474	-0.496631	0.140116	1.33869	0.90806	-3.12806	1.27402	0.0910337	-0.0361986	-1.82143	0.307411	0.183357	-1.42255	-2.3833	0.997862	1.46096	0.814982	-0.337398	3.8759	1.304	2.90298	-0.73801	-1.4194	-2.09852	1.51548	-3.1436	-3.24076	2.88093	-0.982618	-0.55805	2.13542	-3.69297	2.67303	3.2322	-1.3769	0.274463	-0.332368	-1.7002	0.0719983	1.64929	-0.0274648	0.314823	-0.00660247	-0.610039	-2.4292	-0.467624	-0.516242
lib230524_CTAACTTGTAGCCCTG-1	-0.470269	-4.04052	4.29376	1.19497	-1.21623	-0.764805	2.72614	-3.20513	1.23103	-0.37699	-2.13919	-0.613617	1.02377	-2.10577	-0.190218	-0.518556	0.946234	-0.627812	-0.346367	2.29133	-2.0885	1.78809	-0.70216	1.27145	-1.57585	-0.259174	2.03672	-2.04827	0.113481	-1.63782	1.02587	2.14022	0.0662586	-0.311543	-0.552128	0.903333	0.157757	-3.19327	-0.67213	3.29462	0.71724	2.06423	-0.403317	0.484911	-0.197056	1.93743	0.267492	-0.121819	-1.99957
lib230524_CTAACTTGTGGGCTTC-1	7.17578	-1.72301	6.08722	2.0607	-0.0795085	2.88502	2.53459	0.164035	-0.445192	2.16419	-1.61371	0.398938	2.44475	-2.47441	-1.13839	-1.33012	0.701484	0.579375	3.01557	2.08685	-2.90739	-0.419917	-0.515777	2.38792	-1.49439	-0.374393	-0.224118	0.918849	1.89765	-1.43742	1.51916	2.18183	-1.01054	1.95839	-2.27246	2.7051	2.38443	1.61029	3.62265	-0.439687	0.0227252	0.899984	1.24528	0.494828	0.0993008	-0.842323	0.0236751	1.51203	-1.01364
lib230524_CTAAGTGAGAAATGGG-1	1.39569	-4.37621	3.40278	-0.108965	1.25771	0.567057	2.24808	-2.15516	1.03686	0.567834	-1.88161	-2.47381	1.29166	-1.87682	-1.16545	-0.497718	0.416897	0.306541	-0.346624	0.873808	1.4728	0.679543	-1.37403	-0.552915	-1.78109	-1.11978	2.20719	-1.73336	0.889242	-0.341352	1.64139	1.9573	0.617396	0.0866053	-0.223425	-0.818932	-1.51623	-0.922772	-0.737277	-1.65051	-1.12032	0.393068	-0.905117	-0.882383	0.204739	-0.10653	-0.548912	1.46365	1.37099
lib230524_CTAAGTGGTTAAGCAA-1	13.5355	0.808396	10.2661	0.907931	0.632086	-5.02094	4.03	0.674441	0.802889	3.13124	-1.11003	1.24894	-1.3119	2.09535	0.869834	4.24244	1.49621	0.350745	-0.0724557	-0.3504	-2.14173	-1.07262	-2.03604	0.771599	0.0241942	-0.178931	0.922243	0.10266	-0.622136	-1.21417	-1.25713	-0.138663	-1.86039	-1.12543	-1.49098	1.07157	2.79293	0.261149	-2.14733	-1.13045	0.701255	-1.11588	3.92624	0.809156	1.15582	-1.30022	1.38785	-0.417849	1.29165
lib230524_CTACATTAGATGTTGA-1	10.6394	2.50524	3.19747	1.6445	-2.75398	-1.82855	-0.359593	-3.33152	0.546963	-3.75031	1.27693	-5.65478	1.02361	1.15543	2.53599	-4.60271	0.265955	-0.594002	-0.806963	-4.26711	-3.54883	-0.385086	-3.64395	-1.88359	0.539139	-2.56531	3.61211	0.831669	-1.44237	1.74807	-3.96156	-8.83675	4.87037	-3.28613	-1.64746	0.705131	2.118	-0.423569	-4.36525	-1.07738	4.8575	-3.24258	-4.9048	3.86558	-0.748045	-0.128425	0.0651947	-4.42833	-1.97438
lib230524_CTAGACAGTGCCTATA-1	-6.53298	-2.42759	-2.2676	0.280628	-2.1298	-0.233152	0.275956	-0.56027	0.79952	-1.49595	-0.124998	1.24052	0.0679638	-0.076202	0.289582	0.398527	-0.495797	-0.920195	2.05735	-0.281515	-0.271922	-0.331306	1.63828	-0.70178	0.453155	0.64193	0.0853021	-0.654011	-1.44272	-0.130504	0.128432	0.19952	-0.425711	-0.0690888	-0.999965	-1.34294	-0.0352813	-1.21894	-0.845943	0.506297	-1.77428	-0.107932	1.2966	-0.13514	0.53962	-1.16095	0.0769636	0.146214	-0.0799429
lib230524_CTAGGTAGTATGGTTC-1	4.3243	-3.13408	10.2272	2.70854	-4.30285	-6.88738	3.95397	-4.11724	0.484866	-2.77626	1.8974	3.80424	2.46338	4.1196	-0.682614	3.41686	-1.23521	0.218118	-2.28158	-1.86052	2.46385	0.736214	1.72291	0.052617	0.498026	0.813541	-0.978717	0.512142	-0.515948	-0.515539	1.43951	0.195539	-1.64177	0.941461	0.0995389	0.440149	-0.0822918	-0.640844	-0.474161	-0.812226	0.146797	3.35333	-0.858995	-1.60629	0.268576	-0.786364	-1.93102	-0.640535	1.25827
lib230524_CTATAGGAGTTACGTC-1	-3.57984	-1.66494	-0.339988	-0.464272	2.50142	-2.21395	0.123919	-2.99539	-0.82611	-0.47709	-3.26871	-1.97842	-0.564601	1.62082	2.08396	-2.44426	-1.64589	-2.84181	0.473575	0.0242657	2.02249	3.3595	-0.843895	0.253715	0.539101	-0.570141	0.933296	0.837873	1.21057	0.408964	1.63931	0.315995	2.01395	-1.34358	0.998331	-2.51758	-0.127927	2.34265	2.88602	0.751064	-2.52276	-0.494757	-0.974126	-2.44692	-1.11343	-2.43694	0.669366	-0.172001	-2.01541
lib230524_CTATAGGTCTATCGCC-1	0.764249	-2.16932	0.850159	2.51752	0.0367695	0.526989	4.99587	-3.77206	0.708442	-1.2882	-1.67919	-1.38678	2.63363	-2.52138	-1.08837	-1.12128	-0.4838	0.931474	3.1691	-1.21955	-2.57213	1.47678	0.647593	1.72814	0.784769	-2.9938	0.630122	-0.714268	-0.565279	-1.08771	0.469045	-1.6209	-0.121119	0.685736	0.743035	-1.22955	-0.813205	1.58899	0.640763	0.869703	0.495621	-0.583753	1.67553	-1.23767	2.34845	2.20098	-0.444999	-1.15092	2.47629
lib230524_CTATCCGAGCCATTGT-1	7.56639	-3.13079	5.00693	-1.23631	1.33954	-1.7182	-0.749417	-0.431993	-0.205929	2.46201	-0.454731	0.485424	1.45373	1.57737	0.710301	-1.76269	-1.48028	1.22661	-1.41134	-0.0215498	0.837932	-1.28698	0.545228	-0.928247	0.577554	1.24371	2.53354	1.19658	0.566695	0.0674135	-0.450181	-0.860596	-2.16043	0.915461	2.06461	-0.479036	-0.704397	0.048083	0.710505	-0.0247297	0.019258	-0.64274	-1.17811	-1.20804	0.821312	1.52666	1.54976	0.646789	-0.0648778
lib230524_CTATCCGAGGTCGTCC-1	-6.15558	2.57364	-1.84728	3.4997	-3.27562	-7.68207	5.23266	8.10899	-4.88503	0.856839	-1.95829	-3.40712	0.89292	-1.57571	0.438908	-0.756704	0.191796	0.516318	-3.52658	-3.13421	-1.44112	1.37671	-3.21378	1.24492	-1.21568	-1.29599	-0.611028	-2.21372	1.73431	-1.17851	-0.838697	-2.83089	-2.26921	-0.937339	-4.27848	-2.44499	-1.05822	3.44617	-1.41303	1.45148	-1.43532	3.10396	-0.951882	5.72606	-4.77094	1.34032	-3.7613	0.743942	-7.53279
lib230524_CTATCTAAGTCATGGG-1	4.8842	-2.68304	6.87784	0.878023	0.291567	-0.746426	4.38392	-1.92136	-0.86167	2.04602	-2.19239	1.69078	3.01486	0.0191061	-0.953617	-0.247571	1.70809	0.898423	-0.0409668	-1.14086	-0.0219593	-1.07633	-0.608484	0.0864136	-0.531975	-1.32442	0.208314	0.503061	0.436965	-0.111362	2.83935	-1.02244	0.662824	0.991142	-3.79415	0.46006	-0.539161	1.75877	1.51341	1.61426	0.83649	0.684882	-1.71691	-1.29762	0.668896	2.34131	-1.10767	-2.63764	-1.99869
lib230524_CTATCTAGTGGATTTC-1	2.77352	-3.56058	5.70302	0.680411	-0.294548	-0.994358	3.32254	-2.18186	0.445915	-1.06355	-1.68086	0.996051	1.88603	-0.231239	0.10168	0.186262	-0.00459527	1.50468	-0.341931	0.0954946	-0.638245	-1.40707	-0.828949	1.2003	0.550222	0.826552	0.159325	0.399971	2.91464	0.741992	2.18531	0.992068	-1.11441	1.63811	1.48682	-0.485548	0.946045	-1.0472	1.50733	1.77791	0.243998	2.15518	-0.56107	0.194387	1.87468	2.05606	0.683525	2.7366	0.729957
lib230524_CTCAACCAGTTCTCTT-1	2.41113	0.040331	-0.941957	-1.03613	-3.10883	2.24901	2.84207	-2.20322	0.269065	-2.11913	-1.01958	-3.05334	1.18165	1.34169	-0.606038	-1.90642	-1.51646	0.483463	-0.626803	-1.44222	0.278524	2.03951	-1.43415	2.08633	-2.86718	-4.02891	-0.941783	-2.68706	0.237144	1.6281	1.28042	-2.15851	4.20777	-1.61271	-1.10423	2.15324	0.311783	1.10448	-2.27092	-0.831238	-1.54075	1.47139	-1.89944	2.40682	-0.516694	0.619086	-2.1954	-4.05831	-1.97579
lib230524_CTCAACCTCATTGAGC-1	1.4813	-2.12833	1.14443	2.31036	-1.69007	3.50962	1.68022	-0.983507	1.93028	-1.01686	0.123974	-0.521242	0.672542	-1.81192	-1.25667	-1.62184	-0.676934	1.49444	-1.86151	-0.859491	-1.37048	-0.499683	-2.57164	0.882725	-0.479154	0.402527	-1.58851	0.419638	-0.47615	0.329039	2.27189	-1.85244	1.66609	0.389849	1.17877	0.353366	-0.306112	0.902489	-0.213281	-0.965676	-0.731299	0.0296968	0.181367	0.467112	-1.22914	-0.655887	-1.04685	-0.497993	-1.09142
lib230524_CTCAAGACAAGCCTGC-1	-4.40551	-2.2184	-2.38103	1.40495	0.379794	-0.115532	1.94561	-0.961752	1.42772	-0.28957	-1.67982	0.975626	-0.378096	0.818823	0.106628	0.722411	-0.28037	0.448695	0.215542	-2.43555	0.745738	-0.653025	-0.0468815	-0.955309	1.6262	-1.74625	0.163213	-0.0101358	0.343068	-1.1157	-1.05677	-0.680108	-0.0787317	-0.6996	0.532407	-1.55768	0.360493	0.777245	-1.93059	-0.742718	0.0772519	-0.676689	-1.1766	1.16912	-0.773356	-0.702186	0.395266	-1.31387	-0.896425
lib230524_CTCAAGACAATGCAGG-1	4.31493	-1.92988	9.31875	3.21567	-4.92983	-6.97652	2.26253	-1.18881	1.4994	-1.19971	1.52905	4.3318	2.15653	5.82257	1.01056	1.12361	-0.43772	0.677382	-2.44763	-2.24895	2.53976	1.2995	1.59609	-0.570094	0.828807	0.158944	-1.72266	-1.6316	-2.81251	0.39101	1.06744	0.112161	0.670201	0.442407	-0.550715	-0.543283	-4.26913	0.64628	1.29219	-0.450815	-1.09415	-1.27325	-0.390782	-0.594993	0.147753	0.0780373	-0.301329	0.880187	-0.88821
lib230524_CTCAATTCAAAGACTA-1	0.332649	-1.9688	2.40839	2.22561	-2.31427	1.723	3.46168	-0.914356	-0.976471	-1.0375	0.0209328	1.77038	0.886416	-0.589823	-0.847178	-0.807856	0.515588	-0.729706	-1.74027	-0.7246	-0.00958651	1.95322	-2.9267	2.04933	-1.14147	0.0403011	0.0692155	1.11114	0.0386983	-1.68342	1.18782	-2.56721	0.983745	3.58927	-0.966247	-1.12648	0.594245	-0.918877	-0.0587236	-0.196906	-1.60109	-1.22808	-0.542248	0.191469	0.099199	-1.26754	0.704055	-2.2678	-1.86984
lib230524_CTCACTGAGGAGAGGC-1	-1.92057	-4.21251	-0.182035	-0.567617	1.6479	-1.14883	2.19296	-1.03838	2.02272	-0.179106	-1.19578	-1.81506	2.18088	0.371904	-0.417219	-0.131202	-0.119809	1.69089	0.0302765	-0.563567	-1.21547	-1.1569	-2.43784	-0.138167	0.326745	-0.135042	0.401446	-1.78877	0.0535605	-0.769665	-0.220235	-0.594682	-0.943609	1.51568	0.26744	-0.445459	-0.961228	0.343372	-0.831924	0.154413	-1.64542	-2.27028	-0.164089	-0.148853	-0.50769	1.18696	1.3572	-1.01803	-0.227355
lib230524_CTCACTGGTGGCTGAA-1	-6.40717	-2.96444	-1.13775	1.88843	-0.360772	0.149188	0.731637	-2.04813	0.616784	-1.48763	-1.9366	-0.490064	0.625954	0.836415	-0.418152	-0.79343	-0.438204	0.139828	-0.428051	0.508761	-0.417996	0.0191051	-0.547497	0.648479	-1.23228	1.00536	0.383583	-0.335614	-0.830932	0.619607	1.80027	0.96105	1.47635	1.04268	0.211307	0.546144	0.499801	0.688201	-0.868613	0.52842	0.189004	-0.293413	0.713737	0.173168	-1.69673	0.15002	-0.274673	-0.132178	0.353035
lib230524_CTCAGAAAGGAATCGC-1	5.22265	-2.00603	5.37842	0.700775	-1.52442	-0.184212	2.76706	-2.81119	1.88908	0.169103	0.94212	-3.01239	0.937591	0.107617	0.898942	0.879483	0.732852	0.911764	-2.19588	0.78905	-0.813555	1.1846	-0.0817034	-0.546808	-1.45307	1.1634	3.36003	-1.64372	-0.237224	-0.962612	0.347078	-0.176281	-0.232984	-0.570379	-3.23835	-1.29786	0.159993	-0.638587	-4.91413	-1.13683	-0.202651	-0.512311	-0.899079	-1.15749	1.29677	0.726317	-2.18007	-3.84505	2.39034
lib230524_CTCAGAACAGATACTC-1	-4.51905	0.234101	-2.61494	2.80613	1.36631	0.00471606	1.6836	-0.0208672	0.8461	0.21446	-0.144027	1.57693	-0.274332	-0.454816	1.0022	1.52746	0.219153	-1.48686	0.149656	0.55023	-0.291061	2.47741	-0.957201	0.536226	-0.0691699	0.577641	0.103403	-0.00655996	1.47218	-0.468574	0.0843751	1.27128	-0.559057	0.396584	-0.521894	-2.29871	0.826421	-0.474824	-0.575605	-0.925523	-2.50812	-0.509035	0.478355	0.203524	-0.464907	-0.310879	-0.884634	0.658494	-1.47804
lib230524_CTCAGAACATCAACCA-1	-2.62105	0.175808	-1.28176	4.04956	1.70418	-0.450728	0.682551	-2.87313	-0.434278	-0.0376266	-3.38784	-0.716014	0.377602	-0.641809	1.77076	-2.80778	0.541618	-1.78688	-1.81163	-0.411579	1.1605	-0.436834	0.226512	-0.60015	2.04917	-1.43469	-1.20962	2.62413	-0.472324	0.802047	2.75098	1.64171	-0.0301794	-0.496539	-1.44498	-2.75877	-0.108841	-0.833216	0.0253734	-2.31868	1.59996	-2.41299	0.857582	1.34353	-2.82292	-1.20628	0.0553678	-1.8045	0.696562
lib230524_CTCAGTCAGGTCCGAA-1	-13.3865	17.9475	6.21638	-2.5389	3.06441	-1.82341	0.427754	0.748204	0.210926	0.274305	-0.65025	0.903539	1.96214	-3.02793	4.42339	1.23626	-2.35975	1.04127	1.88683	-3.25085	-2.42199	2.84686	-3.1744	-0.189415	0.632828	0.026301	-0.980992	-1.73164	0.286973	-0.79203	4.59214	0.541355	1.07754	-2.43632	-2.45958	2.38654	-1.70337	-2.02377	2.28738	-5.54342	2.4055	-2.95854	4.60874	0.229514	-0.540121	2.11644	-1.28534	0.0209289	2.80831
lib230524_CTCATCGAGGCTTAGG-1	-1.39743	-2.10748	-0.236107	-0.199594	0.38552	-0.822788	2.1038	-2.24438	2.37428	1.53028	0.0844185	-0.782319	0.576045	-1.01283	-1.34062	-1.69365	-0.378449	-0.646716	1.49812	-0.990311	-0.656977	-0.271919	0.226472	-1.96326	0.877436	-0.29354	-0.879106	-0.404545	0.410935	-0.187955	0.98838	0.827866	-1.50761	-1.88188	2.32806	-0.337945	-1.55939	0.281876	-0.215222	1.75826	-2.17895	0.732944	0.859817	0.735552	-0.0204049	0.509433	1.67955	2.04983	-0.258615
lib230524_CTCATGCTCCAGCACG-1	0.18565	-0.578351	1.27514	2.07945	1.08458	3.06996	2.84899	-2.83473	1.42629	-0.601481	-1.14296	-2.17447	2.58903	-1.12058	-0.895907	-0.816141	1.19755	-0.0839492	0.535882	2.51494	1.77944	-0.0759693	-1.08733	1.75865	-1.003	0.379242	-0.0921743	-1.73207	-0.192359	2.70811	0.371557	-0.568276	0.523276	0.336028	-0.446487	1.67475	0.148075	2.63526	1.34542	-0.0917989	0.96801	-1.068	-0.524495	0.995884	-2.41149	0.865638	1.07549	0.826983	3.37064
lib230524_CTCATTACAGCGTTTA-1	11.0766	2.72845	-0.249451	-2.71669	2.3808	-0.784071	1.59885	-0.379873	0.269951	0.810179	-0.588576	-1.80273	0.615207	1.42299	1.80593	-3.4352	-0.506775	-0.376013	0.768849	-2.50671	0.197286	-0.708013	4.25972	1.49766	-1.35467	-1.28238	2.95769	-5.3297	-6.17036	4.67781	-7.24071	0.314424	5.20622	-3.25902	4.74445	1.57141	0.79009	6.60968	0.518016	-6.65424	-3.40563	3.75073	0.514439	1.90315	-1.87897	4.64093	-4.6211	-6.63349	0.00527781
lib230524_CTCATTATCCGCAGTG-1	12.6349	-1.37966	7.75727	0.0171099	2.15557	2.03874	5.46316	1.66722	2.62517	3.37184	-0.622994	-1.75346	3.67196	-1.97582	-2.00432	1.89549	0.372183	0.518661	3.19282	2.54139	-1.63549	-0.801924	-1.37903	1.72579	0.0272119	-0.640895	4.3815	-3.77505	1.43952	-1.18282	0.724258	3.11206	-1.82286	-2.22499	0.128946	-1.20068	1.89195	-1.13693	0.145212	0.628629	-2.23832	1.11177	1.0588	1.03318	-1.15171	1.38111	0.541451	0.939782	-0.919234
lib230524_CTCCAACTCGTGAGAG-1	-0.685327	-2.90742	0.561057	0.165837	3.86199	-1.94044	2.01921	0.389688	1.42846	0.923866	-0.0842931	0.121103	1.00238	-1.62249	-1.04841	-1.61492	0.618837	2.14831	1.03916	-1.42188	-0.764446	1.78822	-0.156527	-0.571107	0.641385	0.8179	-0.924246	-0.987487	1.08709	-1.35736	-0.171296	-0.252896	-0.832516	-0.171537	0.942115	-1.78338	0.133004	1.49583	2.03462	-0.848076	-3.14339	-0.567707	-0.480234	-0.899295	-1.62046	-0.257027	0.847112	-1.28835	0.485081
lib230524_CTCCACAGTAAGATCA-1	1.08438	3.29744	-1.79132	7.24318	6.58156	3.03508	4.65897	0.554841	3.2482	2.90578	-0.225095	1.10685	0.24637	0.162608	-0.666438	-2.80001	-1.40977	1.11308	-0.946098	-3.1967	0.785983	0.213537	0.404991	-0.944997	2.18059	-0.0495841	0.449496	-2.46669	2.96804	1.21025	-1.05092	1.30733	-2.5633	1.05889	-2.16765	-1.86689	-1.84128	1.19904	-0.491647	-0.62545	-3.30862	1.14725	1.50194	-0.358527	-1.00361	0.28156	-0.469937	4.52291	-0.616124
lib230524_CTCCCTCAGCGATCGA-1	15.7906	2.60048	6.86815	-2.94706	-3.52077	-3.56271	-0.168859	0.191368	1.78947	3.18562	-0.0624331	-2.72461	0.549197	3.89348	1.72208	-1.77324	3.75807	-3.16018	-0.133225	3.4448	-0.386011	4.41304	-0.218009	7.22282	1.48397	0.0250753	3.9502	-0.170089	-6.15248	1.20212	-6.35111	-2.03798	2.54941	-1.09107	-2.36359	0.425412	-0.310395	1.43329	-3.8648	-6.86685	2.29324	-0.371892	-4.00591	-0.104551	1.16896	-2.2319	-0.441369	-3.22536	0.0595109
lib230524_CTCCCTCAGTTAGTAG-1	3.27585	0.505444	-0.0786427	6.09689	2.5136	4.34482	6.37588	-0.407459	2.51432	-0.3017	-0.0738353	0.743921	2.11573	-3.27046	-1.20877	-0.0372182	-1.0897	1.55105	2.31033	-2.52529	2.22691	0.843647	-0.862299	2.08959	0.709172	0.683993	-0.0805431	0.611271	-0.540255	0.230827	0.262146	-1.37612	0.827806	0.250117	-0.281701	-4.24086	-3.17447	0.830179	2.67368	2.89578	0.389375	-1.43701	-0.888257	1.69015	0.998846	-2.15872	0.379337	1.27289	1.54482
lib230524_CTCCGATAGAAGTCCG-1	7.09132	-2.72935	4.79312	0.708499	1.28568	4.52291	4.21854	-0.623046	-1.53811	-0.272589	-0.0687053	0.339773	1.51977	-3.66069	-1.4887	-0.407743	-0.347521	1.52033	3.05443	1.02771	-0.861977	1.17845	-0.205673	1.21215	-0.811784	1.29468	2.4579	-1.95975	1.05633	0.23089	1.64393	2.70835	1.35041	0.366474	-1.52374	-1.36964	0.818527	0.590279	-0.654762	-0.177317	-0.0720305	-0.415842	0.753159	1.38458	-1.11286	-0.843823	-2.0626	1.80486	-0.629255
lib230524_CTCCTTTAGATCCTAC-1	3.34184	-4.01439	7.69906	1.94704	-1.80009	-1.94423	0.754154	-1.79772	0.832304	-0.148518	-0.29386	0.983617	2.00317	0.659672	0.0178488	0.260625	-1.36322	-0.203054	-1.41714	0.971932	2.03629	-0.66161	1.36053	-1.15863	0.0638317	0.686864	0.885518	0.66706	0.976776	-0.0292672	0.996956	-1.11071	-1.3702	1.88836	1.29629	0.638833	-0.90298	-1.87093	-0.763245	0.903493	1.66447	0.126804	-1.26135	-1.26549	0.0303936	0.992616	0.390329	0.778606	1.11549
lib230524_CTCCTTTAGTCATCGT-1	10.0181	-0.9623	6.50922	3.0064	0.735655	1.9193	2.76454	-0.559913	1.44693	1.23207	-1.27017	0.483653	2.36048	-1.93768	-2.56195	0.420318	0.915945	-0.818685	0.718825	1.06856	-1.21771	-0.6531	0.469791	0.482096	-0.971826	-0.831887	0.176095	0.558677	3.71269	0.459798	0.156273	0.853173	-0.256786	2.79947	-0.694608	3.64305	-0.372172	2.36488	3.53418	1.57925	-1.42818	2.73383	-1.59385	-0.103304	-3.83703	0.763259	1.63751	-0.723811	-0.651873
lib230524_CTCTCAGGTCAACACT-1	-3.28503	4.19521	-5.82035	4.37751	1.66792	1.66727	3.36188	1.52804	1.3414	0.199233	2.98853	4.74092	-0.982869	3.03136	1.36936	0.572996	-1.64321	-1.74371	2.73131	0.879434	-5.28927	1.30552	1.71801	-2.24039	1.32866	-0.925512	2.35461	-1.78612	1.61492	2.69894	-1.01702	0.138378	-0.308191	0.678606	-2.51415	0.419881	-1.66524	2.47266	-0.927446	-3.14247	-3.57422	-1.98058	0.403072	0.073631	2.2886	-1.39675	-2.14113	-1.53007	-0.192533
lib230524_CTCTCAGTCCAAGCAT-1	-2.06216	1.55134	-4.08572	1.63859	-3.95563	0.291802	-0.538624	-0.213197	2.19768	0.524509	3.0165	0.68712	0.489593	1.40076	1.11271	-1.52287	1.64001	-2.71894	3.2813	2.89969	2.40415	-0.62001	1.13166	3.03167	2.62607	-1.76283	1.16861	0.150185	-0.611512	1.41559	-1.30895	1.16418	-1.68711	-1.33916	1.1903	-1.23853	-0.252048	-2.54918	-1.34001	-0.628877	-0.0730106	-0.161536	1.8914	1.19934	2.24954	-1.6195	-1.60544	0.477498	0.763165
lib230524_CTCTCAGTCGACATCA-1	0.387935	-1.59966	1.77821	2.22993	2.12877	2.03202	3.79705	-0.893447	1.08993	0.550772	0.861523	0.952393	1.9656	0.284443	-1.86338	-2.67121	-1.91712	0.305564	0.159857	-2.52224	1.32515	0.1145	0.855245	-2.1263	0.107273	-0.559285	1.84289	-3.93673	3.03359	1.11216	0.314638	-1.36309	-2.04726	1.09602	2.84872	0.588813	-0.014479	2.05313	-1.59579	-0.881326	-0.947301	-1.27835	0.615177	-2.0766	0.958506	-0.117863	-1.12223	0.69062	1.96693
lib230524_CTCTCGACAAAGGATT-1	0.628644	-2.81322	9.22423	3.02843	-2.97655	-6.60702	2.2037	-2.68593	0.981569	-2.69305	0.430845	1.84985	-0.199005	4.43632	0.0524091	3.20643	-2.39541	0.340211	-1.91374	-1.47783	2.48798	0.0269333	0.749286	-2.18318	0.262132	1.40716	-3.33224	0.678539	-0.876737	-1.1147	2.7827	2.01674	-0.12487	-1.45946	0.981083	1.30352	-0.326671	0.388376	1.89067	-0.288014	-0.89893	1.29621	-1.42131	-0.0823394	0.488618	-0.800919	-1.09069	-1.98718	2.00642
lib230524_CTCTCGAGTATTTCGG-1	2.03156	-0.726376	-1.57585	3.07866	5.72493	-0.0694748	2.91985	0.389244	3.2535	1.82016	0.111296	-1.27134	3.0458	0.6945	-2.35524	-1.32603	0.128703	2.3082	1.52106	-2.78643	-1.83847	0.360688	1.03267	-1.7832	2.08913	-0.0559385	1.80631	-2.03216	1.01059	1.21732	-3.22176	-0.47615	-3.51666	0.081618	1.78988	-1.74881	-1.66532	0.224206	1.83398	-2.5853	-0.277675	0.141865	-0.160958	-1.96815	2.11108	1.2358	-2.53883	-0.284133	0.606428
lib230524_CTCTGGTTCATTCATC-1	2.04227	-2.21326	4.80017	3.06649	-0.0416176	3.34799	4.6697	-3.42545	-0.652042	-1.06142	-0.917398	0.117093	1.62677	-2.40509	-1.52638	-0.0083335	0.525146	0.0928456	1.92328	1.12898	-0.713767	-0.222913	-1.53316	1.13597	-0.383751	-0.684634	0.312905	0.784361	0.858597	-0.784466	0.806176	-0.673742	0.572347	-0.877986	-2.51057	-0.00691915	2.14644	0.388839	-0.486461	1.76057	0.685568	-0.523466	-0.0291688	0.400781	0.143801	-1.23739	1.56785	0.883902	0.581494
lib230524_CTCTGGTTCCGAGATT-1	3.47786	-1.07087	1.45689	1.80553	2.64273	1.12246	3.64713	0.822664	0.737806	-0.0188738	0.457439	-1.67912	-0.254998	-1.17374	-0.703129	-0.105099	-1.11564	-0.651064	4.60504	0.0931162	-1.66177	0.879167	1.30116	-0.171292	0.111893	-0.03405	-1.46224	0.513555	-1.05748	-0.210404	-1.25111	1.46508	-0.847953	0.245071	-0.723859	0.763072	-2.66884	0.441211	-1.71212	-0.4027	-0.173899	-2.82952	2.8414	-1.00663	0.0550451	-2.49937	1.63496	-1.10444	-1.05171
lib230524_CTGAATGTCGACGAGA-1	1.71195	-3.79255	4.6146	1.16483	0.123	2.47829	2.815	-2.10819	0.832664	0.726921	-1.18331	-1.80812	2.03713	-1.891	-0.297355	0.164818	1.08062	0.499647	-1.69044	0.480718	-0.493009	-0.588045	-0.180339	1.12495	-0.763842	0.278477	0.596144	1.17571	2.28129	1.7342	2.24009	-1.71705	0.437049	1.2737	2.26474	1.4613	-1.00282	-0.768769	1.59408	2.26695	1.25579	-0.528781	-1.23975	0.470153	0.189643	0.316755	2.48829	0.723832	-1.12103
lib230524_CTGAATGTCTACTTCA-1	0.554149	-1.91873	3.56376	4.80042	-1.20328	2.64155	1.33213	-2.05234	0.435309	-2.16748	-1.51532	-0.667992	2.02589	-1.69054	-1.28913	-0.954178	-0.574798	-0.00783334	0.571138	0.399648	-0.294017	-0.110054	-0.770445	-0.703305	-0.267446	1.32665	-0.838457	2.97973	0.935701	0.831539	1.77555	-0.356162	0.960122	2.26117	-0.214957	0.505317	-1.40548	1.78604	0.762501	-0.105803	-0.633963	0.184859	0.339748	0.578369	-0.644522	-1.95807	1.81069	0.70688	1.35853
lib230524_CTGAGCGAGAGTGTTA-1	4.16396	-3.39617	5.64348	1.77453	0.507841	-1.47442	3.5568	-1.74623	1.63365	0.288446	0.446611	0.36448	-0.131331	1.2231	-0.126819	1.18228	0.606712	1.74538	1.48346	3.21217	-1.83206	-0.731998	-0.693443	1.68872	-0.22448	-1.93135	2.55195	-2.46909	2.77663	0.612354	1.56078	3.77321	1.66084	-0.577862	1.65631	-0.375846	-1.60269	-1.58564	-1.82909	2.79297	0.0469448	0.354945	0.146265	2.62316	1.7406	1.35537	1.15908	-0.729847	-0.73851
lib230524_CTGCAGGTCGCGCTGA-1	12.8963	5.20024	3.78074	8.35129	1.32596	4.11076	11.0017	1.97176	1.3462	-0.32304	2.87338	-1.01649	1.9566	-4.89747	-3.09963	-0.955592	3.18159	-1.33867	2.13551	4.54835	-3.73519	1.69906	-7.80022	8.13202	2.18942	1.0251	0.665757	1.4676	0.136481	-0.305715	3.62064	-0.0960389	4.98654	2.65153	-1.02324	-3.18477	3.89948	0.162919	-0.160495	1.08133	1.93711	1.28656	2.25114	-0.16846	-3.54398	-2.42397	-7.24045	-1.08438	-5.55457
lib230524_CTGCAGGTCTAGCCAA-1	2.28943	-3.6545	8.07715	1.55471	-2.29893	-1.92322	2.49363	-2.54269	-0.108389	-1.78958	-0.196823	2.56838	0.612351	1.73947	-0.393975	1.74198	-0.465602	0.170373	-1.11712	0.914946	1.80304	-0.357122	0.732744	-0.706539	0.00753564	1.18145	0.428723	-0.0823711	-0.299846	-1.91206	1.18488	1.19382	-0.0236237	-0.284964	-1.72803	0.0832335	0.914414	-2.27528	-1.69385	3.10828	3.41678	0.487674	-0.123747	-0.48109	1.4503	-1.32983	-0.0999965	0.838731	1.46603
lib230524_CTGCATCAGGGTCTTT-1	8.17237	-0.678358	3.30044	0.816213	3.70301	1.73305	4.40679	1.2024	2.01556	-0.0356132	0.679006	-2.91356	0.178832	-1.27854	0.603441	-2.88392	-0.403472	-0.240151	3.90901	-1.85794	-3.07897	0.562999	0.665958	-1.36114	0.695602	-0.744718	0.676513	-0.0037075	-0.449052	0.64972	-2.6541	-2.88073	-0.934713	-0.168949	0.76292	0.00171693	-2.27555	0.569111	-0.185492	-1.14158	-2.64236	-1.50054	2.10836	-0.123221	2.53386	1.30169	-0.335162	1.64927	0.336602
lib230524_CTGCATCCAGAACTAA-1	-5.11906	-2.58844	-1.43105	2.22851	0.23762	0.3514	-0.307434	-3.48575	0.148533	-3.11244	-2.89956	-1.11238	1.47231	-1.21511	-0.772565	-1.01408	-0.380732	0.250122	-1.47995	-0.830629	0.159677	2.58666	0.203765	-0.267373	0.155937	-0.153195	-0.993421	0.114774	0.317336	-0.28675	-0.817649	0.634711	-0.932423	-1.12841	0.0728536	-0.802438	0.0535587	-0.40841	1.21985	1.2783	0.472818	0.0622487	0.666774	-0.467826	0.170882	0.48428	-1.30482	-0.483954	1.61214
lib230524_CTGCCTATCACGTAGT-1	7.76423	0.161731	0.602913	-1.74006	0.00325165	2.57762	2.64686	-1.09425	1.81888	0.18547	0.195961	-3.26355	1.76187	-0.483647	-0.548824	-3.33566	-1.45516	-2.72273	2.60488	-1.74406	1.55536	1.2376	1.09395	-0.241733	-1.72767	0.158189	0.437986	-4.70601	-4.36521	3.64686	-8.5317	0.431246	3.98018	-3.08453	4.00796	1.22094	-2.3411	0.779348	-2.33126	-2.3385	-2.50931	1.5925	-1.29722	1.58771	-3.36423	4.57188	-2.85803	-2.54909	-3.49415
lib230524_CTGCGAGGTGCTGATT-1	2.79877	-1.95801	2.97277	0.920462	-0.393635	0.0629605	2.12951	-2.67015	1.45455	-0.688896	-0.0457705	0.644321	2.37446	-1.76766	-0.747065	-1.94697	-0.544556	-1.93478	-0.215432	-0.646667	-2.51944	0.57097	-0.970645	3.22744	2.32413	-0.35902	1.70171	3.51264	2.12529	-0.652108	1.11711	-2.64171	1.82959	0.0534434	-1.44261	2.0989	-0.375064	1.11394	-0.47242	-2.37488	-1.55135	2.3803	-0.804281	-0.772114	-3.45307	-3.10728	0.986024	6.09238	-1.73561
lib230524_CTGCTCACAGCTCTGG-1	0.866983	-3.54125	2.76288	0.422333	-0.146113	2.62224	1.34172	-2.83022	-0.960132	0.0664407	-1.27693	-1.68983	-0.24639	-1.73998	-0.502036	0.0316893	0.156704	0.996056	2.10327	-0.28821	-1.05891	0.688328	0.154218	0.635654	1.49853	-0.958482	0.116255	0.735095	1.02617	-1.23062	1.10156	1.92928	2.18168	0.78316	-0.265717	0.333254	-0.319703	1.07025	-0.234469	-0.330719	0.457225	1.56059	-0.46357	-0.088243	-0.289829	1.7159	-0.353722	1.98144	1.99156
lib230524_CTGGCAGCAACCGCTG-1	0.451523	-3.25466	2.19781	0.971997	0.633376	1.60972	2.70895	-2.24197	-0.289924	-1.07934	-1.95101	-2.64616	0.816339	-1.40843	-0.319829	-1.07549	-1.21893	-0.236342	1.99518	-1.11682	-1.4467	1.02859	1.17419	-1.39224	0.741563	-0.191679	-0.979515	-1.04547	0.112471	-0.723904	-0.619284	1.41398	0.211171	0.221695	-0.459866	-1.27005	-0.881674	1.18823	-1.93074	-0.390163	-0.178426	-1.00044	1.14398	-0.476371	0.432187	1.53857	-0.961652	-1.81834	-0.540062
lib230524_CTGGTCTAGTGATTCC-1	5.86631	0.717986	5.60355	7.20246	-1.45634	0.654774	3.13189	0.0987619	3.09989	-1.3272	1.50766	-0.0318746	1.05078	0.324119	-0.301445	-1.48465	-1.98814	3.20334	2.98584	-2.36185	0.642083	0.818084	0.104087	2.59401	1.70485	-2.37705	-1.60784	0.160321	-0.590337	-3.62753	1.20689	1.17342	1.31918	3.0763	0.802208	-2.73333	0.776434	-2.4155	-2.32121	1.16019	-1.20306	-0.399628	3.33137	1.60879	0.571429	-3.33015	0.575415	-0.789572	-1.3037
lib230524_CTGGTCTTCAAGAGTA-1	-5.77836	-2.14412	-0.633473	-0.406652	-1.56854	-1.53283	-0.048364	-1.6091	0.980164	0.551343	-1.62881	0.400308	0.139986	-0.150366	0.646471	-0.332922	-1.23446	0.240909	0.998626	1.25419	-0.412888	0.152738	1.29201	-1.55739	-0.366581	0.54986	0.860765	0.385115	-0.00272714	-1.41345	-0.242783	0.145591	0.393667	-0.797432	0.959353	-0.153552	-0.865915	1.08905	-0.0249361	1.99953	-0.276575	-0.593406	-0.503104	-0.00599719	-0.919923	0.105536	-1.32275	-0.791701	1.60884
lib230524_CTGGTCTTCGGCGATC-1	-4.114	-3.79429	1.1298	1.19612	-1.92464	0.493611	2.11797	-1.17998	0.820742	-1.15689	-1.41916	-1.18971	1.39525	-0.745749	0.405344	-2.16915	1.2316	-0.388908	-1.3239	-1.41552	-0.32751	-0.436359	-0.713884	0.816116	-0.190299	-0.0468277	-0.330055	0.595717	0.182079	1.39547	-0.293749	-0.927462	0.616589	0.506259	1.44823	0.80831	-1.06564	0.209119	-0.578404	0.50073	1.158	0.926522	-1.17867	0.692623	0.363997	1.44113	0.030937	-0.407854	-0.715161
lib230524_CTGGTCTTCTACTATC-1	7.87926	3.76595	-4.82963	-1.44504	-2.63961	4.46351	4.25996	-1.197	3.26667	-2.036	3.40275	-2.55906	2.61058	2.77821	1.53868	-2.20439	0.773816	-1.39892	3.17245	-0.506691	-2.09917	4.29213	-0.195424	-2.49153	2.90671	-2.32066	-0.0334953	-2.27828	-1.50098	2.17761	-1.68699	0.00886433	0.058931	0.633565	0.768203	-1.94993	-2.02244	0.0847769	-1.00928	-2.28784	-0.539615	-3.71857	1.7846	0.597675	1.6782	-0.130265	1.44326	-2.20842	-0.928426
lib230524_CTGTACCAGACTTAAG-1	11.6013	1.14444	7.9272	0.922154	-1.75125	1.99274	3.42669	2.50028	1.84186	1.39244	-1.25206	-2.34332	1.97715	0.436887	0.0816802	0.270637	1.56512	-1.13423	3.1924	-0.207794	-4.2252	-2.29409	-0.641974	-0.420375	-0.0701849	-2.29044	-2.772	0.150818	-0.911277	-2.73394	-1.52896	-4.17839	0.500234	0.637124	2.41939	-0.728445	1.93978	-0.67603	-0.76798	-0.498845	1.96888	-3.65359	5.10832	1.91439	2.70349	1.68964	2.38401	0.170741	0.233828
lib230524_CTGTAGACACTGATTG-1	-5.51372	-3.9818	-0.530557	0.326353	-0.537033	0.0868013	0.407939	-2.34227	0.694763	-0.94586	-0.834677	-0.149816	0.843578	-0.683637	0.558746	0.163411	-0.652867	-0.470576	-0.168633	-1.25523	0.00710295	-0.457269	1.24183	-0.834016	0.497302	-0.7571	-0.836201	-1.02819	-0.225074	-1.31635	0.673517	0.524472	1.00285	0.444774	-0.693767	-0.133476	-0.808083	-0.399873	0.195366	0.0255432	0.557126	0.068705	-0.0889865	-0.533111	-0.158286	-0.548591	0.369041	-0.203644	1.163
lib230524_CTGTGAAAGCCTCTCT-1	-1.05622	1.22144	-3.07824	3.16334	0.585087	-1.54048	-0.475209	-3.46311	-0.749383	0.300897	-2.3626	-3.8998	-0.185376	-0.580517	2.06888	-2.53132	1.48115	-3.52201	-1.7234	1.33188	1.72599	1.93373	0.18209	-4.34611	0.912226	0.513515	-0.64618	1.24442	0.0717331	-0.00392456	2.97949	-1.88778	3.59892	-0.507591	-3.40838	-2.2818	1.37902	0.471344	-2.14868	-0.0448441	1.59992	1.56303	-3.11892	0.758155	-4.12485	-1.55783	-0.578489	-2.83697	-0.481169
lib230524_CTGTGAACAGGCCTGT-1	-6.28719	2.767	-3.71223	3.18151	-6.5767	-6.17613	6.67801	7.77995	-8.32338	0.012294	-3.04072	-5.81379	0.118184	-3.06503	-2.324	-2.22691	1.25819	-1.49118	-1.7506	-2.95466	0.753278	-0.515932	-0.30327	2.41082	0.366239	-0.891246	-3.12792	-0.402651	-1.00946	0.417332	1.53776	1.28393	-3.9078	0.301751	-3.88515	-0.350141	1.10932	6.68857	-4.16823	3.22663	-3.30672	-1.94473	0.301494	4.33652	1.22724	-1.21813	-0.228401	1.12331	-0.988454
lib230524_CTGTGAAGTAGTGCGA-1	-3.37133	-1.45693	-2.41818	6.36705	1.07854	3.94895	3.24806	-3.2274	1.78097	-1.97779	-0.477038	-2.13092	0.564584	-2.13719	-1.96329	-0.460004	-0.467021	0.372812	1.92572	-2.59578	2.3695	1.65571	0.989499	-2.13673	3.15057	-0.968786	-1.63606	-0.1064	0.711687	0.956667	-2.25503	0.814193	-0.59186	0.543144	0.408158	1.06054	-0.381993	-0.248947	0.434149	0.68393	1.08395	-0.131601	2.81348	0.163004	0.476188	-1.27948	1.23847	-0.916985	-0.584335
lib230524_CTTACCGAGATACATG-1	-13.5629	24.0383	7.95608	-4.53536	5.10306	0.339389	0.16588	-0.54387	-0.952914	1.24897	-1.26105	1.29963	0.0982498	-3.22795	6.64952	1.28469	-2.2924	0.973192	-2.56682	-3.50574	-2.47725	1.62174	-1.84627	0.438081	-2.8219	0.172716	0.730974	-0.94549	2.61133	0.242041	2.06241	3.41791	0.467431	-5.09645	1.45333	5.57478	-0.361909	0.691303	1.66061	-6.06186	-1.49523	-5.73681	1.0162	-3.20391	0.902485	-0.189024	-0.117897	-1.46699	0.209523
lib230524_CTTCAATCAACACTAC-1	9.86768	-0.00663988	11.6103	5.40948	-1.80567	-8.51942	6.34084	-0.219999	1.85744	0.211054	4.02981	4.31583	-1.02219	4.12868	0.393118	6.64582	-1.52822	-0.0724112	0.36789	-0.615496	-0.730775	-1.24093	0.00729206	2.16793	0.689802	-0.831555	1.19157	-0.101235	-1.68345	-1.78933	-1.71837	3.09313	2.26933	-3.36093	0.939641	0.560989	6.06833	-2.97595	-2.65487	0.161924	2.73382	-0.264932	3.45735	1.31606	1.28808	3.44187	1.7828	-1.5669	4.78843
lib230524_CTTCAATGTCGCTTAA-1	-15.0697	25.1971	9.75506	-5.17197	5.11343	2.13854	-0.418143	-0.923123	1.15545	0.390936	1.2192	2.98322	1.65033	-2.19531	4.60707	0.434453	-2.68914	1.28582	-2.07682	-0.144742	-2.47951	0.797178	-1.66069	-0.572945	1.34588	1.41064	0.43616	-1.6364	1.44391	-1.06436	5.31851	0.475771	1.47151	-3.10088	3.11136	1.49106	-0.748843	-0.959877	0.306337	-6.21574	-0.845386	-7.69324	4.64995	0.855338	-2.80499	4.33485	0.113314	-2.54904	2.95037
lib230524_CTTCAATGTCTGTGAT-1	2.82473	-3.20107	4.27897	1.68063	1.26417	-1.42221	3.02148	-1.43869	0.507683	0.479246	-0.454193	-0.176616	2.27079	-1.9981	-1.51184	-1.10974	1.57654	0.0163202	0.335284	3.03892	-1.03934	-1.93884	-0.817662	0.615393	-2.74485	-0.925716	-0.286273	1.56138	2.44063	-1.92981	1.14796	0.593933	-1.14343	0.207659	0.297395	0.335218	-0.584117	-1.54529	0.78236	-1.52254	0.0914446	-1.77927	1.70008	-0.592523	1.27059	-0.229375	0.181626	0.236307	0.198506
lib230524_CTTCCGAAGTTGCCTA-1	5.53775	-0.164441	0.274144	-2.7758	-0.12347	-0.376653	0.263436	-1.21067	2.11003	0.435067	-0.509772	-4.01066	0.838176	-0.803823	-1.0932	-2.73728	1.22607	-1.18713	2.16245	0.445501	0.794	2.65143	1.92501	0.958495	-1.64094	-0.91164	1.04012	-2.00959	-7.83983	4.04627	-3.83923	1.40744	4.64085	-2.50656	3.32807	1.3645	-1.24666	2.21165	1.23399	-2.17069	1.47558	3.35777	-1.40884	3.25735	-2.48101	2.17343	-4.93616	-2.14764	-1.45153
lib230524_CTTCCGAGTTCTCCAC-1	-3.27413	-2.12022	-1.48781	1.66587	3.57069	-1.50273	1.67963	-1.95163	1.56652	0.664738	-1.94063	0.356577	0.396406	-0.42281	0.489091	-1.94126	-1.19902	0.237889	-1.39432	-1.76722	0.271426	-0.368147	-0.293197	1.52965	-0.368236	0.858571	-0.145549	-2.7395	0.900989	-0.179159	1.72422	1.20549	0.301579	1.03143	-0.437214	-0.474726	1.59968	0.712349	-0.615956	-0.336113	0.00754535	-0.456202	2.14015	-0.68064	-1.46113	0.0753712	1.70746	-0.264547	-1.29901
lib230524_CTTCCTTGTCCCAAAT-1	0.760199	-4.97511	6.32099	-1.05501	-1.62466	-2.95641	0.447948	-1.65573	0.394511	0.0522374	0.326214	0.905238	1.3041	1.75505	0.147659	0.460744	-0.75194	0.452529	-1.04356	-1.82095	1.40349	-0.0677034	-0.11873	-0.444467	-0.897304	-0.651371	0.459562	0.229646	0.691932	1.7756	0.964175	-0.631195	-0.731605	0.783565	-0.293498	2.27376	-1.37673	0.667122	0.608378	-0.0185517	0.294492	0.245639	-1.19041	-1.00596	0.959709	-0.543769	-0.276605	-0.105086	-1.24853
lib230524_CTTCGGTGTGTTAGCT-1	4.25743	-2.94843	6.25761	2.94915	-1.49367	0.442522	1.88368	-1.9575	1.98408	2.05034	-1.82134	1.66135	3.50998	0.358034	0.350034	-1.80539	-0.697983	1.61488	0.057464	-1.04208	1.39831	-1.06096	1.12299	-1.67486	0.198865	1.01865	1.22004	2.66468	2.71846	0.769076	-1.29712	-1.90028	0.712183	2.71788	0.966815	1.56491	2.56488	0.170096	2.16279	1.14929	1.4975	-1.1014	-0.769165	-1.20267	0.821825	2.19361	-0.574811	1.4794	2.67483
lib230524_CTTCTCTGTTTATGCG-1	-2.99881	-2.71976	-0.649757	0.853938	-1.40193	1.78532	0.622236	-1.34301	0.140356	-0.441785	-1.88578	-0.913199	1.6611	-0.519596	-1.53394	-1.78515	-0.773215	-0.136995	0.797243	0.0532045	-0.650543	1.17532	-0.258129	-0.30365	-0.428711	-0.0211994	-0.088465	0.301151	0.880321	0.519298	-0.227903	0.00370559	-0.695442	-0.18179	-0.41405	0.556699	-1.31623	0.310432	-1.14307	-0.163719	0.187934	1.00681	0.0244099	0.682395	0.383478	0.0431435	0.197065	0.460733	0.532983
lib230524_CTTCTCTTCACGACTA-1	8.71774	-1.17104	5.34492	1.96501	0.998649	0.687776	3.19924	-0.0160799	1.68632	1.0712	0.40993	-0.176502	1.3113	-0.582204	-1.07844	0.862462	0.350683	-0.812995	0.217705	1.07473	-0.185575	-1.30251	0.453752	0.862326	-0.633534	-0.63407	0.0549506	2.35538	3.6621	0.3617	2.07754	-1.04364	-2.67796	-0.0469169	-0.11861	5.33368	0.292483	2.72984	1.02949	2.38288	-0.885319	1.47076	-3.32707	0.834441	-0.275113	-0.376987	1.15544	0.191423	-0.0508
lib230524_CTTGATTAGCCTCTGG-1	-4.26237	-3.51375	-2.78606	0.330133	1.69489	-0.791909	0.301153	-1.91712	0.754726	0.550621	-0.317006	-0.826377	0.191288	0.158639	-0.143416	-0.961232	0.816983	0.692198	1.06048	0.689307	0.405173	0.753774	-1.01999	-0.268969	0.899463	-0.480918	0.161874	0.687623	-0.811362	1.1025	0.380989	0.369045	-0.219992	-1.3216	-0.833319	-0.735752	-1.42551	0.689569	-0.412046	0.77491	-0.563718	0.728012	0.932897	0.573104	0.762016	-0.499045	0.256239	-0.151301	0.0474809
lib230524_CTTGATTGTTAGAAGT-1	1.0172	-1.43247	0.179625	0.931236	2.52294	-0.794294	1.50987	-1.58696	1.39583	-0.895179	-0.960687	-3.07805	2.20692	-0.491724	-0.109258	-3.10929	-1.38906	2.95232	-0.173774	-0.197935	0.906951	-0.387427	0.0194042	1.21372	-1.57462	1.9667	-0.0247325	-2.01927	-0.0784963	-0.919451	-0.199264	-1.5723	2.05887	-1.16127	-0.50857	0.832078	-0.212117	1.9714	0.358356	-1.37354	-2.81724	-0.478503	-1.66941	0.17373	-0.776694	-1.08952	-1.18852	-0.239555	-1.00557
lib230524_CTTTCAAAGTAACCTC-1	-1.55341	-1.30165	3.00647	2.19653	-3.22914	-0.104662	3.0563	-1.20977	-0.814656	-1.07922	-1.00412	-0.0375701	1.45101	-1.24657	1.12748	0.196844	0.969584	-0.380413	-2.46649	0.997924	0.48131	-0.18149	-0.485958	-0.175542	-1.56099	-0.977799	-0.469484	2.10888	1.67312	-0.123965	2.57777	-2.63467	1.12269	2.21473	-4.32205	-0.0359887	1.20288	0.303179	-2.41888	-0.985312	0.184621	-0.289578	-0.619212	1.55143	-1.52635	-0.638925	-4.14711e-05	-2.77263	-0.760075
lib230524_GAAGAATAGAGGTCGT-1	-4.77756	-3.88566	0.213758	0.280256	0.0255678	-0.995869	1.66992	-1.63773	-1.07093	0.338982	-2.33869	-1.67269	0.101689	0.0366536	-0.444474	-1.01872	-0.317932	1.04816	0.0110402	-2.50189	0.18702	0.896242	0.0466796	-0.271508	-0.199897	-0.502068	-0.53293	-1.27024	0.488313	0.389856	-0.369961	0.236795	-0.92918	-0.291142	-0.219886	-1.28108	0.145923	-1.01625	-1.02513	-0.184122	-1.32405	0.456676	-0.308996	-0.947173	-1.46461	-0.0704223	0.382272	0.795302	0.907076
lib230524_GAAGAATTCCAAATGC-1	-3.10862	-3.32191	2.43304	1.195	-0.848706	1.76468	1.9733	-1.29714	-0.278611	-1.13325	-2.08475	-1.68303	0.878074	-0.844868	-1.09207	-0.152088	0.186259	-0.260595	0.913078	-0.784672	0.194702	-0.518652	0.799876	-1.29071	-0.403756	0.458734	-0.780859	0.936216	0.104629	-0.774772	0.529334	-0.913844	-1.4404	1.46402	0.347718	-0.850179	0.167608	-0.576278	-0.223546	0.332273	0.733998	-0.341056	0.391376	0.953266	0.946463	1.30966	-0.252332	0.462085	0.63567
lib230524_GAAGAATTCCCTATTA-1	11.3107	-2.10476	9.05274	1.75933	1.26328	-0.0850207	3.24194	0.78344	0.80711	4.13301	-1.6228	1.26973	1.1089	-1.54357	-1.84681	2.03013	1.92464	0.45759	1.08086	1.92507	-2.10636	-2.77077	1.57236	1.27959	-0.110818	-0.249758	2.87708	1.25003	3.74709	0.374383	3.09974	-1.9908	-1.95113	1.07407	-0.691449	4.76173	2.07437	1.00177	0.0987137	3.01448	-1.30659	2.52737	-1.11211	-1.11619	-1.90524	1.14419	0.759669	-1.22406	-0.911228
lib230524_GAAGAATTCTCGTCGT-1	1.40618	-2.88724	4.44956	1.39259	-1.22268	0.650605	2.4821	-1.95068	2.96409	0.524974	-0.414163	2.06556	3.88057	-0.486068	-1.78078	-1.56663	-0.179992	0.397249	-2.10478	0.433563	0.111549	1.30247	-3.56566	2.25392	-0.355367	0.573423	0.649046	-2.10265	0.751684	-2.69001	3.23962	0.209574	0.696321	-0.421135	-2.05646	-0.747883	2.44394	0.171429	-1.08313	0.412487	-3.26763	2.21532	-0.0427265	-0.96056	-1.50706	3.76966	-2.78673	-2.01931	-1.4028
lib230524_GAAGCCCGTCGCTTGG-1	0.129342	-3.911	1.66886	-0.81642	2.4545	-1.46442	2.26014	-1.07487	0.986543	0.196747	-0.593765	-0.519113	-1.08317	-0.622213	0.689648	-1.00227	-1.21393	0.313503	-0.367083	-0.196454	-2.58776	0.399605	-0.512369	-0.333915	0.537173	-0.93384	1.77977	-0.793033	1.45517	-0.132528	1.34602	1.01622	-0.530003	-0.773103	-1.81977	0.292285	0.965148	-0.487345	-3.1275	-0.711329	-0.93825	-0.609845	0.626651	1.02913	-0.810361	0.208144	-0.453514	-0.731559	1.41966
lib230524_GAAGCGAGTAGCTCGC-1	10.3771	-1.81657	8.18211	1.37395	-0.366101	1.99175	3.77573	1.16705	1.51372	1.89146	1.00737	-0.504567	2.80767	-1.07174	0.322983	0.253786	0.406131	0.0265341	1.22709	-0.0934623	-1.28423	-2.75942	-1.75868	0.161142	0.5602	-2.09476	0.254105	-0.00390656	0.575686	-0.0928525	2.58309	-3.266	1.27734	1.97475	-0.684615	0.15259	0.0593154	0.265692	3.17998	2.00152	2.56515	-0.595436	-3.47004	-0.670958	1.54553	-0.550278	0.662309	-1.59291	-3.45597
lib230524_GAAGGGTAGCCGTTAT-1	3.82899	-3.01194	4.43559	-0.201225	0.564812	1.48789	1.26751	-0.88042	2.09081	2.1578	-1.50888	-2.00934	2.1595	-0.10454	0.269092	-2.20081	-0.127617	-0.0353872	-0.809115	-0.702901	-0.0511391	-1.17123	0.0977223	-0.821874	-0.1453	-0.16034	-0.0873138	2.11839	1.79958	0.483765	0.9819	-2.58614	-0.93047	-0.673536	2.64039	0.303382	-0.298843	2.40493	0.665886	-1.78096	-0.26939	0.64747	-1.67558	-2.16095	0.476669	-0.108908	0.571672	2.26928	0.570816
lib230524_GAAGGGTTCCGGGACT-1	2.81239	-3.90272	6.60365	-1.13752	-1.82035	-2.57088	0.569541	-0.934802	-1.08549	-0.00852454	-0.482119	0.528256	0.781651	1.54596	0.499064	-1.36785	-0.176851	0.333285	-0.0900152	-0.593945	-0.00496835	-0.44569	-0.564379	-0.614261	-0.150256	-0.631597	1.49821	1.22506	0.182705	1.93541	0.331821	-0.215635	0.713404	-0.762865	-1.36499	2.5552	-0.571069	1.0709	1.51969	0.578736	1.40461	-0.92505	1.0343	1.43713	2.02324	0.401302	0.753455	-1.10195	-0.569158
lib230524_GAAGTAACACCTATCC-1	-6.05294	-1.49027	-1.8977	2.12598	1.53728	0.951448	3.02503	-2.35192	0.779823	-1.21873	-2.26306	-0.28576	0.991789	0.290784	-0.306629	-0.479833	1.01772	-1.61121	-0.946202	-0.884663	0.234636	1.03092	-0.00857163	-0.0829691	1.50092	0.888131	0.595955	-1.41922	-1.74109	1.35461	1.0638	1.73351	0.306455	0.303233	-2.42091	0.0120276	-0.976574	-3.574	1.33414	1.49259	1.54663	0.066416	-1.08456	-0.297175	-0.639863	-2.67797	0.132258	-1.2697	-0.831326
lib230524_GAAGTAAGTAGTACGG-1	6.25741	-0.975655	6.03955	2.48722	-1.25637	-1.16054	1.33122	-2.51434	0.053772	1.08852	-0.00383026	1.6086	2.96917	-0.0874682	-1.71373	0.649683	1.37033	-0.641236	0.490951	0.385147	-1.13511	-1.06525	-0.812826	1.99535	0.131671	-0.939346	2.37381	3.26748	2.83255	-0.84985	3.45909	-1.69233	-0.0527424	0.189299	1.07405	4.44127	4.79684	2.19898	1.54867	1.44445	3.14137	3.44268	-2.36986	-1.98284	-2.82138	1.06104	2.86571	-4.68722	0.808542
lib230524_GAATCGTGTGTCCTAA-1	0.92099	-0.992502	2.77595	-0.72794	-3.73395	-1.49528	1.84672	-0.842814	-2.1822	-1.48614	1.79088	-0.0606848	2.23886	-0.688716	0.174441	-1.05328	2.00022	0.304461	-0.817977	-0.0946251	0.301912	0.519392	0.881402	-0.440785	-0.593181	-0.687711	0.607203	2.6021	0.179703	0.620806	0.722385	-2.76194	-1.02282	1.71023	-2.01493	2.0501	0.395624	1.56857	-2.83313	-1.15143	0.716719	0.341922	-0.940351	-0.892462	-1.65146	1.17865	-0.0837333	-1.60482	-0.45219
lib230524_GACACGCCACTCCTGT-1	1.551	-0.246346	-1.85727	3.20824	5.55993	-0.0728646	4.65748	-1.95859	3.98028	1.26804	-0.227772	0.901921	-0.944874	0.491688	-0.695534	-2.39889	-1.56581	2.4894	2.09757	-3.22924	1.68811	0.626951	-0.307851	-0.270517	1.06722	-2.02599	3.80382	-5.0041	-1.56116	-2.47434	-1.74682	-0.612998	-4.4984	-1.17722	2.00448	-1.03002	-0.380445	-0.765129	2.0249	1.84327	-1.76933	4.16913	3.27091	-3.42031	2.17379	5.5111	-2.2251	-2.47402	0.212409
lib230524_GACATCAGTAGCTCGC-1	13.6085	3.08187	6.8039	5.03681	-0.31929	0.42645	1.58613	2.01126	0.572639	2.89949	2.47924	2.95275	1.36016	2.84423	0.929793	2.96115	0.441624	2.25413	0.141887	-3.4224	-1.55592	-3.40147	-1.3352	0.19991	1.74657	0.528737	2.31187	2.40133	-0.935559	1.74608	-0.673977	-4.57577	0.930758	0.225193	0.421111	2.76916	2.29453	0.037854	-0.787418	2.12914	0.150239	-2.63346	-0.0539016	-0.0642255	0.233696	-0.57091	0.478118	0.297024	-2.26061
lib230524_GACCCAGCATCAACCA-1	10.1655	0.848222	5.00048	1.89582	2.25657	1.31839	3.97631	2.53715	1.19146	2.40558	-0.443161	-0.183918	1.90127	0.516095	-0.415982	1.1797	-0.248063	-0.159389	2.57618	0.758518	-0.817714	-2.15883	0.703009	-0.917987	-0.0491966	-0.260809	3.93267	0.335944	1.13109	0.304939	-0.298187	0.621897	0.227374	-1.8923	0.543496	-1.13128	1.09105	-0.403051	-0.0758704	-0.0550533	0.443671	-0.698146	-0.0579675	-1.09118	-0.399816	-0.474243	0.637706	0.647044	-1.24949
lib230524_GACCCAGTCGTGGGTC-1	2.41537	-2.54988	2.78471	0.638935	-0.706775	1.49198	1.87429	-3.1526	-0.557282	-1.77033	-0.0719226	-0.922155	2.01506	-1.87012	-0.506323	-0.643273	-0.576369	-0.581825	2.80184	0.302632	-0.979243	0.056885	0.862151	-0.501492	1.45086	-0.2495	-1.92106	1.51363	1.15301	-1.65823	0.0130104	-0.449079	-0.205814	0.796514	3.28957	0.09993	-2.29151	-1.93699	-1.34745	1.47838	-1.17163	-0.0974121	3.29484	0.87447	0.214284	1.44331	2.55219	-2.66862	-0.921065
lib230524_GACCCTTTCAGCTTGA-1	5.87476	-1.2742	9.36669	2.54121	-3.15571	-7.97241	0.233252	-2.51964	-0.174915	-2.00596	4.09328	3.80214	0.652137	3.15697	-1.36072	3.86288	-2.04253	0.23473	-4.90561	-0.717379	1.70497	0.551172	0.494139	-2.40987	0.251669	1.16636	-0.260646	-2.33384	-1.52886	-0.705193	0.519047	-0.0294319	1.49623	2.15119	-0.283971	-1.34464	-2.10976	0.527454	3.36234	-2.78953	-1.19624	-0.869636	-0.852466	2.43553	-0.846816	-1.38729	-1.56341	2.3936	-0.940979
lib230524_GACCGTGGTCAGACGA-1	3.32136	-2.49156	5.38619	0.312066	0.181084	0.266544	3.39879	-1.52976	-0.479897	1.64402	-0.637474	1.18282	1.98202	-2.30664	-0.792589	0.160195	2.00698	-0.432086	2.45261	-0.399859	-1.06211	-0.147014	-0.92907	1.03773	-1.58078	-0.881366	2.25087	-1.89374	0.367372	-1.70568	1.00353	4.56735	0.511348	-0.333047	0.814158	-0.785719	1.25839	0.584612	-0.849571	3.72817	-0.31174	-0.311434	-0.485671	0.115044	1.49171	0.416345	0.698755	-0.101432	1.67891
lib230524_GACCGTGGTTTGATCG-1	-6.44044	-3.3019	-0.999316	1.29652	-3.28491	-0.262707	0.428554	-2.28743	0.531343	-2.07854	-1.81864	-0.731503	0.095731	-0.360683	-0.211623	0.0376811	-0.635585	-0.533156	1.87836	-0.073369	-1.55835	0.754788	0.61979	-0.398245	0.22402	-1.81623	-0.0527054	-0.0784935	-0.85395	-0.436566	0.434221	-0.0586963	0.075976	0.362308	-0.356844	0.466512	0.281013	-0.0984704	-0.476271	1.86215	-0.0371917	-0.527346	-0.00298613	0.322276	-0.621796	0.266187	-0.943164	0.0875397	0.231429
lib230524_GACCTTCAGTTGCTCA-1	-0.857747	-3.66555	-0.0854666	-0.421843	0.261084	0.276887	0.834883	-1.2456	1.95088	-0.349329	-1.19643	-2.85313	-0.208464	-1.19544	-0.590532	-1.00909	-0.535068	1.88355	-1.18494	-0.0480374	1.19038	1.21942	-0.316277	-0.271053	-0.661562	-0.821411	0.46167	-0.483758	0.526962	0.301982	0.606267	-0.45584	0.650907	-1.41151	0.100928	1.97702	-0.0815319	-0.910615	0.42274	-0.969288	-0.422043	0.437358	-4.00358	0.695982	-1.25524	-1.88424	-0.318184	0.928378	0.156963
lib230524_GACCTTCCAAGTGTCT-1	-0.0828356	-1.2283	-1.46601	0.802104	1.61656	-0.79736	3.44102	-2.19224	-0.337769	1.14875	-1.33929	-0.599782	0.856469	0.0219414	0.141565	-2.16432	-1.03089	-0.857019	0.58002	-1.22463	-2.32877	1.43608	1.14138	-0.946724	0.0294296	-0.865702	1.09688	-1.06509	2.10974	0.764794	2.22424	-1.15814	-0.397766	-0.114667	0.573297	-1.13586	-2.30999	1.03836	-0.217342	-0.245081	-3.14461	-0.378165	1.2833	1.48049	0.526754	-0.33582	2.71185	-0.513526	0.56061
lib230524_GACGCTGAGAGTCCGA-1	7.77969	-2.49437	4.31005	-1.12803	-0.814688	0.527315	5.16289	-0.550506	2.51617	-0.00330434	-0.290093	-2.94249	3.8076	-1.94755	-0.323393	0.096544	2.10668	-0.322349	3.97493	0.406017	-2.22256	-1.07728	0.169919	-0.925393	-0.400501	1.09325	0.00997227	0.12574	-1.81339	-1.80801	0.266511	-1.62139	-0.170147	2.24044	1.30785	-2.90096	-2.89225	-2.44614	-1.86192	-0.34829	1.04201	-3.2938	4.9401	0.005206	1.52271	1.04251	3.29613	-0.613875	0.730953
lib230524_GACGCTGGTCGGTACC-1	0.98419	-2.29451	0.357991	-0.680268	-1.23862	0.790708	0.573552	-2.59387	0.011266	0.552509	-0.967748	-1.80689	1.25532	0.997149	0.923285	-3.56406	-1.0973	0.106433	-1.6835	-0.303344	1.11879	0.214494	2.58046	-0.618689	-1.40214	-1.9296	0.612962	-0.791538	-2.82833	0.788365	-1.54548	0.388137	2.0317	-1.99042	0.380792	2.56857	1.07145	1.62387	-1.31511	-0.817237	-1.2966	1.9949	0.151964	2.00836	-0.806067	3.08539	-0.176336	-1.09551	1.08217
lib230524_GACTCAAAGAGCCCAA-1	5.39153	-2.20633	11.1316	1.38663	-3.90649	-10.3762	2.03177	-2.62607	0.724301	0.908264	2.26706	4.63823	1.22185	5.137	0.140788	3.01685	-1.75108	-2.73212	-2.68462	-1.85209	3.28179	3.1291	1.19944	-3.53804	-0.0114724	1.94183	-1.4563	-0.677139	0.230708	0.262988	0.324443	1.5081	-1.65696	-0.454208	-1.00652	1.29816	-1.81213	-1.46113	1.30267	0.0293152	-4.45934	0.94952	-0.358625	0.669524	1.97094	-1.6257	-3.03662	-1.40863	-0.184107
lib230524_GACTCAAGTATGCGTT-1	4.61953	-1.21527	2.80962	2.2682	-0.413831	1.46797	2.09607	-2.92564	0.352302	-1.31116	0.788954	-1.64923	0.485827	-2.35664	-0.863901	-1.68037	0.429367	-0.111304	3.928	0.862771	-0.629011	2.08288	-0.67096	0.953238	2.22025	-1.28181	-3.12551	2.04117	-1.87826	-0.970233	-0.628785	-0.518393	2.74014	0.0359392	0.737162	-1.12476	-2.61342	-2.78137	-2.58241	0.00912321	-0.433852	-0.700129	1.9823	-1.04075	0.202745	1.9278	4.21088	0.0792852	-0.204755
lib230524_GACTCAAGTCCAACGC-1	-5.24138	-3.17348	-0.963662	1.3998	0.10782	-0.463212	0.551935	-2.87534	0.986733	-1.93794	-2.37628	0.0895434	0.636913	-0.263591	0.108093	-1.01829	-0.563044	0.590897	1.47174	-1.31577	-1.30352	1.37027	0.00383478	-0.736483	1.53923	-1.30213	0.0512415	-1.23257	-0.203246	1.02826	-0.507093	0.746382	-0.784268	0.086682	-1.07725	0.0639444	0.988278	0.223533	1.10335	-0.431105	-0.935956	-0.0027551	0.63284	-1.44098	0.0200044	0.363845	-0.195511	0.199122	1.71171
lib230524_GACTCAAGTGCCGTAC-1	4.09494	-1.45039	1.01759	0.668595	3.58607	-0.442186	5.99561	0.0722107	0.93747	0.883717	-0.388427	0.355206	1.02601	-1.22886	0.40041	-0.630196	-0.0629134	-1.80251	2.66599	-0.5365	-2.65182	0.866337	0.92351	-0.501334	-0.0259144	-2.56893	1.03908	-2.24425	0.167306	1.05928	0.844999	1.16681	-1.09202	1.15095	1.12556	0.0208343	-1.27202	0.720376	-1.14432	-0.315814	-2.39854	0.271908	1.65053	-0.0881939	-0.161972	0.130394	1.03364	1.21508	1.87565
lib230524_GACTCAATCAAGAGTA-1	4.75952	-2.42075	2.21387	0.261269	2.47235	0.879233	2.60618	-1.16672	2.23596	1.87945	-1.30072	-0.737843	2.86105	-1.58518	-1.97921	-0.769039	-2.02639	0.772284	-0.592524	2.29806	0.707687	0.464771	-1.39918	-0.882517	-1.98171	1.57726	2.75292	-1.96476	-0.0368921	-0.0787621	1.90584	1.03359	-2.99908	0.140822	1.11682	-0.725906	-0.060518	-1.42903	-0.110599	-1.70262	0.0110674	0.920133	-0.395292	-1.54729	0.0469833	-1.03789	0.929923	2.09976	-0.0207709
lib230524_GACTCTCAGGGATCTG-1	2.72601	-4.55398	5.96649	-0.607416	-1.28304	-2.49944	0.355398	-2.16963	0.393923	0.0956724	0.619536	0.700779	1.56029	1.32732	-0.601855	-0.20566	-0.413746	0.506135	-1.07813	-1.22533	1.26894	-0.28008	0.740062	-2.69178	-0.511171	-0.341562	0.104245	1.05574	0.492851	1.13127	0.498299	-1.60691	-0.768654	1.32541	0.812282	1.19574	-1.64081	0.766301	-1.71082	0.279137	0.162643	0.471067	-1.91273	-0.895013	-0.487794	0.740145	0.85866	-0.820209	-0.131104
lib230524_GACTGATAGCGATGGT-1	0.366047	-0.539625	1.70333	1.01026	-3.99262	-0.667215	2.13207	-2.11707	-2.56412	0.344033	-1.50828	-1.42877	1.03146	0.100924	0.940337	-2.69754	0.554982	-0.0576906	-2.37642	-0.216955	-1.85865	0.431316	-0.782344	-0.0510477	-0.534626	0.218073	0.769932	0.837104	0.270019	0.56049	1.33084	-1.02703	0.551939	2.00276	-2.58876	1.37703	-1.16939	1.45575	-1.84227	-0.865128	1.31341	-2.16277	-1.81427	2.21131	0.452161	-0.743329	-0.426678	-2.89365	-0.711516
lib230524_GACTGATCACAAGCCC-1	0.860623	-2.50964	1.11224	1.7675	1.13203	2.88719	3.59507	-1.41774	1.32561	-0.0888244	-1.75626	-1.38021	2.53064	-1.83307	-0.697558	-2.6211	-0.720785	0.853026	-1.38651	1.0397	0.916947	0.023029	0.125207	0.512337	0.0805968	0.346749	0.754216	-0.709939	-0.913933	2.62202	-0.981659	0.144304	-1.27481	-3.16697	1.6251	-0.690902	1.25036	-1.00048	-0.230193	1.5137	-2.91922	1.20709	-0.574298	-0.341394	-3.4258	-1.05206	0.550159	2.58913	-0.0074849
[truncated: 2,701 more rows]
[truncated: 1 more columns]
