# Supplementary material for: Single-cell Transcriptomics of Postimplantation Embryos: Unveiling Aneuploidy Effects and Lineage Dynamics
Source: Research Square preprint supplement (doi:10.21203/rs.3.rs-4111897/v1), 2024-03-22
Supplement: Supplementary file 7 [file be289bfbe0b1ff2d60c75f2f.xlsx]

## Sheet: Sheet 1
A vs. E	A mosaic vs. E mosaic	A mosaic vs. A	E mosaic vs. E
-3.89828	-2.58975	3.88056	2.13673
-1.7693	-2.66482	2.40282	1.76023
-2.28953	2.77009	2.42062	1.22431
-2.25274	-2.83215	2.784	-3.41541
-2.05169	-2.81115	3.56965	-1.89667
-1.14417	2.49055	1.80653	-1.64127
2.04586	-2.24582	1.76267	-1.58264
-1.36892	-2.11078	-1.35335	1.77855
-2.45932	-2.10637	2.00682	1.92248
-1.9527	-2.72119	1.91812	1.23357
-1.01014	-2.09716	2.31529	-1.59415
-1.11491	-2.56669	2.08772	-1.45694
-1.76303	-1.6777	3.73654	2.06803
1.73097	-1.88205	2.45307	1.34798
-1.72367	2.8119	2.05884	-1.40689
-1.09597	-2.61539	2.72671	2.34936
-1.12591	-2.24814	3.06765	1.34257
-1.12789	-2.24013	1.24077	-2.24702
-2.44447	-2.3002	2.95542	-1.31943
-1.57396	-2.27361	1.84851	-2.12044
2.05805	-1.40795	2.01455	-2.28773
-1.92328	-2.36355	1.58219	1.89727
-1.64139	-1.49519	-2.17408	-1.7477
-1.06156	-2.41642	-1.63405	1.36914
-1.36524	-1.6037	2.50972	-2.05449
-1.64931	-2.61254	1.85243	-2.297
-1.81639	-2.06786	2.17197	-1.45447
-1.11486	-2.33971	-1.91926	1.28282
-1.64226	-2.26094	-1.67399	-1.92625
-1.30461	-2.17187	1.82208	-1.85368
-1.60516	-1.65716	1.93311	2.345
-1.50715	2.4708	1.95405	-1.25971
-1.06115	-2.24336	1.72226	2.23661
-1.06428	-2.32497	2.64904	-1.172
-1.32837	-2.06691	-1.60745	1.64992
-1.73905	-1.98355	-1.93704	1.24141
-1.41638	-2.01908	1.73346	2.3079
-1.48655	-1.80679	-1.8174	2.02769
1.27522	-1.11919	2.21774	-1.2488
-1.5283	-3.55414	1.80718	2.58375
-1.30936	-1.95366	1.46046	-1.94389
-1.398	-1.27917	-1.45505	-1.58753
-1.61601	-1.92177	1.56852	-1.44857
-1.55866	-1.82852	2.21455	-1.14956
1.58261	-1.78271	1.56229	-1.15046
-1.21127	1.39481	2.07429	-1.85281
-1.06108	-1.82244	2.23882	1.94422
-1.50656	-1.1041	1.19143	-1.85655
-1.33314	-1.65168	1.68213	1.74028
-1.02455	-1.96301	-1.61615	-1.63739
-1.29293	-1.82563	1.28662	-1.01528
-1.37392	-2.0292	1.73052	-2.09649
-1.12499	-1.34849	-1.80321	1.05405
-1.59286	-1.44281	1.55224	1.6324
-1.2342	-1.07946	-1.72635	-1.25954
-1.25772	2.3589	1.7341	-1.00489
-1.32577	-2.02587	1.24151	2.08146
-1.42144	-1.72558	2.01558	-1.53433
-1.19726	-1.87757	1.07076	-1.23419
-1.3072	-1.73016	1.41283	1.73474
-1.32219	-1.66987	-1.76012	-1.41761
1.40349	-1.74818	-1.77105	-2.09457
-1.08962	-1.93285	-1.75777	1.58107
-1.67865	-2.08247	1.34041	-1.16027
-1.30412	2.2243	1.61892	-1.19289
-1.30593	-2.39185	-1.71417	-1.60772
1.05096	-1.97972	-1.49374	-1.37723
-1.1771	-1.54704	-1.21034	-1.71658
1.52874	-2.16219	1.22573	-1.68923
-1.26911	-1.7667	2.02378	-1.41696
-1.094	-1.80136	1.64188	-1.20467
-1.07014	-2.0333	1.56321	-1.1514
-1.0685	1.64821	1.68242	-1.61127
-1.17647	-1.81517	1.62947	-1.12963
-1.07141	1.58696	1.94167	1.09406
1.39062	-1.73657	1.15767	-1.47394
-1.23891	1.90619	2.1522	-1.456
-1.31461	2.16722	1.21635	-1.47937
-1.26624	1.99303	1.56161	-1.4314
-1.0721	-1.8004	1.4888	-1.52122
-1.25722	-2.02648	-1.67994	-1.07077
-1.26119	-1.60661	1.9922	-1.21399
-1.10268	-2.09861	1.91996	1.68735
-1.16857	-1.57842	1.14023	1.38661
-1.73105	-1.85921	1.77337	1.49842
1.30368	-1.74361	-1.00592	1.04644
-1.29755	-2.06308	1.62821	1.38082
-1.05809	-1.8009	1.5398	1.44883
-1.31237	-1.83869	1.85713	-1.37501
-1.13223	-1.42927	1.05675	1.41509
-1.13084	-1.96164	1.55353	1.27883
-1.22992	-1.58101	-1.77791	-1.35734
-1.40655	-1.77471	1.31504	1.39875
-1.19232	-2.05831	1.125	-1.36979
-1.2313	-1.29412	1.26294	-1.50251
-1.11361	-1.55812	1.53802	-1.09878
1.03161	-1.21631	1.58529	-1.71941
-1.1	-2.16813	-1.38243	-1.40403
-1.07088	-1.28103	-1.58336	1.07273
-1.19247	-1.53705	-1.6553	1.41531
-1.19765	-2.47459	1.11977	-1.40631
-1.18245	-1.55264	1.7685	-1.49215
-1.29742	-2.40998	1.86969	-1.19335
-1.1035	-1.37074	1.5188	-1.46281
1.2723	-2.36278	1.46151	-1.45243
-1.09708	-1.6384	1.6431	1.44016
-1.25619	-1.72057	2.01602	1.28355
-1.06197	1.82341	1.49191	1.21336
-1.20312	-1.33901	1.47446	1.38306
1.21597	-1.65341	1.86716	-1.26523
-1.19834	-1.86284	1.45304	1.37828
-1.13238	-1.53055	-1.27942	1.25976
-1.49743	-1.63394	1.13083	1.44774
-1.22004	-1.5922	1.11109	1.63376
-1.17177	-1.05271	1.36849	1.24551
-1.02824	-2.35335	-1.29869	-1.22657
-1.26455	-1.27271	1.46911	-1.28556
1.58811	-1.93098	1.68705	1.11609
-1.04732	-1.16521	-1.32838	-1.39643
1.39067	-1.6679	-1.47267	-1.31583
-1.10504	-1.40603	1.4297	-1.05021
-1.05745	-1.68443	1.81859	-1.04345
1.04122	-1.67044	-1.32698	-1.44558
-1.03153	-1.58859	1.67684	-1.04472
-1.29509	-1.43688	-1.416	-1.48118
-1.09932	-1.70572	1.18517	1.24462
-1.19886	-1.633	1.03953	-1.27148
1.1158	-1.69333	1.20917	-1.32483
-1.00814	-1.74578	1.43857	-1.10446
-1.09078	-1.37549	1.25133	1.40902
-1.16288	-1.68024	1.37771	-1.13525
-1.02997	-1.46404	1.7069	-1.22297
-1.12828	-1.632	-1.25544	-1.25951
-1.10946	-1.8598	1.1719	-1.27891
-1.02004	-1.35066	1.51888	-1.2187
-1.16719	-1.28165	-1.06102	-1.22052
-1.16324	-1.10543	-1.40706	1.27863
-1.22474	-1.52887	-1.35381	-1.45658
-1.08121	-1.57352	1.55563	-1.13915
-1.19984	-1.61387	-1.18608	1.2433
-1.06875	2.24722	1.25855	-1.37219
-1.26753	-2.6162	1.42655	-1.35989
-1.08522	-1.13142	1.12003	1.10028
-1.05798	-1.09029	1.76372	-1.29034
-1.12042	-1.70325	-1.51734	-1.28769
-1.09959	-1.73159	-1.02188	1.19627
-1.06873	-1.45024	1.89305	1.31251
-1.00924	-1.20013	1.53267	-1.44663
1.2348	-1.53807	1.39686	-1.16985
-1.53174	1.82728	1.69926	-1.18584
-1.04665	-1.30668	1.01015	-1.01681
-1.49719	-1.985	1.0139	-1.07345
1.38741	-1.52355	-1.1451	-1.09216
-1.02462	-1.6127	-1.21879	-1.20331
-1.10603	-1.47281	1.23127	-1.00118
-1.02015	-1.56402	-1.04779	-1.23119
-1.06295	-1.60094	-1.31835	1.23295
-1.08496	-1.76727	1.48945	-1.23183
1.26513	2.2417	1.55215	-1.0696
-1.05814	1.83143	1.6026	-1.16921
-1.56113	-1.62859	1.39167	1.0959
-1.0662	-1.49121	-1.31454	1.10363
-1.03785	-1.73644	1.19341	1.40234
-1.08318	-1.54425	-1.33167	-1.18216
-1.17999	-1.83994	-1.33524	-1.10858
-1.03727	-1.90928	1.79371	-1.18458
-1.135	-1.27346	-1.14547	-1.15122
-1.04302	-1.08575	-1.06769	-1.15343
-1.01413	2.03743	-1.53128	-1.42135
-1.00299	-1.75591	1.41207	1.01837
-1.16273	-1.57546	-1.48112	-1.11738
-1.08983	1.16884	1.63043	1.07454
1.15015	-1.46917	-1.17323	-1.04815
1.08018	-1.57953	1.04067	-1.184
-1.02321	-1.39195	1.58361	-1.05917
-1.01154	-1.18786	1.32922	-1.07895
-1.04007	-1.55806	-1.07811	-1.01197
-1.03847	-1.05879	-1.13006	-1.01913
1.15387	-1.6378	1.23465	-1.0748
-1.01609	-1.87205	1.29953	-1.03659
-1.04201	-1.60747	1.07068	1.64048
1.17475	-1.65768	1.31799	-1.23024
-1.00905	-1.54951	1.4857	1.39515
-1.30727	-1.41593	1.14256	-1.0534
-1.03368	-1.47856	1.21989	-1.02148
-1.0163	-1.46438	1.3405	1.06696
-1.02183	-1.56732	1.49504	-1.07256
-1.01356	-1.39773	1.1847	1.38209
-1.00281	-1.62532	1.39615	1.114
-1.04581	-1.43382	1.70277	-1.09043
1.09246	2.00381	-1.20218	-1.07905
1.19939	-1.35771	-1.29576	-1.50738
1.00451	-1.74827	1.08628	1.07765
-1.19088	-1.48126	1.17376	-1.0757
-1.06066	-1.51143	1.447	1.07957
1.05996	-1.41118	1.43492	-1.09463
-1.41045	-1.43556	-1.05667	-1.07684
-1.01611	-1.34306	1.19546	-1.04173
1.16131	-1.4235	1.2541	-1.03688
-1.11318	-1.29389	1.16081	1.07592
-1.02096	-1.57867	1.3595	1.07678
1.11812	-1.34307	-1.06187	-1.16301
-1.02566	-1.84634	1.46975	-1.04273
1.07974	-1.56926	1.2534	1.03307
-1.01648	-1.67174	-1.06561	1.0132
1.02798	-1.66584	-1.25477	1.05971
-1.58342	-2.01281	1.34914	1.10254
1.6542	-1.53773	-1.23522	-1.04854
1.01209	-1.44126	1.11149	-1.01083
-1.04329	-1.47466	1.05634	-1.0475
-1.08644	-1.72292	1.52783	1.2383
1.07043	-1.6807	1.26906	1.14105
1.19557	-1.6246	1.46375	-1.06924
-1.02879	-1.53088	1.42101	-1.00189
1.01098	-1.56896	-1.15943	-1.28857
-1.00942	2.01751	-1.14049	-1.05473
1.1292	-1.20656	1.13083	-1.01161
-1.02891	-1.57168	1.08998	1.06588
1.09894	-1.38328	1.13079	-1.46058
1.06762	-1.66162	1.13004	-1.01728
1.01365	-1.6354	1.28841	1.03451
1.20041	-1.3869	1.38799	-1.07105
1.01533	-1.4422	1.51022	-1.11769
-1.09646	-1.47715	-1.03585	1.11247
1.05951	-1.49936	1.09502	-1.05987
1.14617	-1.47692	1.26922	-1.26791
1.06748	-1.17593	-1.15418	-1.01595
-1.02338	-1.28945	1.24301	1.07319
1.00925	-1.60623	-1.03636	-1.00026
-3.89828	-1.10274	-1.16203	-1.37451
-1.7693	-1.61675	1.12527	-1.15971
-2.28953	-1.53363	1.22886	1.28881
-2.25274	1.82742	-1.04833	-1.14405
-2.05169	-1.20287	1.14903	1.00626
-1.14417	-1.51348	1.18686	-1.03347
2.04586	-1.7116	1.19677	1.24144
-1.36892	1.53089	-1.06516	-1.01065
-2.45932	-1.51002	1.1659	1.07054
-1.9527	-1.52123	1.26959	-1.11819
-1.01014	-1.52754	1.36357	-1.07915
-1.11491	-1.28135	-1.15582	-1.00098
-1.76303	-1.28206	1.35479	-1.31863
1.73097	-1.57208	1.0045	-1.03207
-1.72367	-1.54851	-1.20215	-1.13549
-1.09597	-1.39127	-1.05752	1.01996
-1.12591	-1.51887	-1.19581	-1.05367
-1.12789	-1.42001	1.37809	-1.30871
-2.44447	-1.52098	1.1	-1.03364
-1.57396	-1.43171	-1.16807	-1.18867
2.05805	-1.42044	1.25352	1.01346
-1.92328	-1.55515	-1.20115	-1.151
-1.64139	-1.32912	1.33493	-1.05283
-1.06156	-1.59668	-1.13262	-1.02666
-1.36524	-1.20481	-1.11765	-1.00873
-1.64931	-1.54849	1.48384	-1.35177
-1.81639	-1.43414	1.00176	-1.09697
-1.11486	-1.35128	1.33812	-1.00049
-1.64226	-1.45806	1.39032	-1.25494
-1.30461	-1.0769	1.29245	1.06769
-1.60516	-1.33169	-1.05929	-1.01363
-1.50715	-1.38365	1.28852	-1.00231
-1.06115	-1.37871	-1.04648	-1.11118
-1.06428	-1.28467	-1.01992	-1.03208
-1.32837	-1.17982	-1.05089	-1.00439
-1.73905	-1.50593	-1.08304	-1.1107
-1.41638	-1.4247	1.36682	-1.01935
-1.48655	-1.52875	-1.12598	-1.04149
1.27522	-1.35598	-1.11539	-1.40027
-1.5283	-1.36496	-1.12396	-1.08094
-1.30936	-1.41059	1.21115	2.13673
-1.398	-1.51306	-1.09263	1.76023
-1.61601	-1.30678	1.08807	1.22431
-1.55866	-1.29585	1.04157	-3.41541
1.58261	-1.16957	-1.07016	-1.89667
-1.21127	1.52423	-1.0878	-1.64127
-1.06108	-1.56496	1.05794	-1.58264
-1.50656	-1.49477	-1.08827	1.77855
-1.33314	-1.33913	-1.06921	1.92248
-1.02455	-1.32469	-1.14328	1.23357
-1.29293	-1.3307	-1.07727	-1.59415
-1.37392	-1.33346	-1.03791	-1.45694
-1.12499	-1.4409	-1.12459	2.06803
-1.59286	-1.59623	1.27969	1.34798
-1.2342	-1.51501	1.11067	-1.40689
-1.25772	-1.34915	1.08506	2.34936
-1.32577	-1.13637	1.16744	1.34257
-1.42144	-1.32228	-1.03709	-2.24702
-1.19726	1.9552	1.19524	-1.31943
-1.3072	-1.21858	1.15982	-2.12044
-1.32219	1.66435	-1.38287	-2.28773
1.40349	-1.46216	1.09072	1.89727
-1.08962	-1.29529	1.27604	-1.7477
-1.67865	-1.19551	-1.02213	1.36914
-1.30412	-1.41471	-1.15501	-2.05449
-1.30593	-1.30379	-1.07475	-2.297
1.05096	1.25092	-1.0885	-1.45447
-1.1771	-1.05691	1.25441	1.28282
1.52874	-1.32826	1.10785	-1.92625
-1.26911	-1.60311	1.06128	-1.85368
-1.094	-1.10637	1.14574	2.345
-1.07014	-1.34214	-1.14972	-1.25971
-1.0685	-1.44605	-1.08259	2.23661
-1.17647	-2.21292	-1.07065	-1.172
-1.07141	-1.01681	1.22074	1.64992
1.39062	-1.51978	1.05835	1.24141
-1.23891	-1.20478	1.27302	2.3079
-1.31461	1.52744	1.35972	2.02769
-1.26624	-1.26238	-1.02421	-1.2488
-1.0721	-1.14642	-1.04438	2.58375
-1.25722	-1.41773	1.02531	-1.94389
-1.26119	-1.44574	1.0649	-1.58753
-1.10268	-1.52021	1.11431	-1.44857
-1.16857	-1.36621	1.12754	-1.14956
-1.73105	-1.40546	1.07529	-1.15046
1.30368	-1.53787	-1.04357	-1.85281
-1.29755	-1.3595	1.22802	1.94422
-1.05809	-1.40127	1.25751	-1.85655
-1.31237	-1.40098	1.36983	1.74028
-1.13223	-1.43977	1.05034	-1.63739
-1.13084	-1.21536	-1.04434	-1.01528
-1.22992	-1.16031	1.24544	-2.09649
-1.40655	-1.19252	1.12149	1.05405
-1.19232	-1.42532	1.1001	1.6324
-1.2313	-1.40243	1.03257	-1.25954
-1.11361	-1.45418	1.00304	-1.00489
1.03161	-1.02783	-1.17056	2.08146
-1.1	1.35548	-1.02901	-1.53433
-1.07088	-1.43344	1.05755	-1.23419
-1.19247	-1.122	1.35297	1.73474
-1.19765	-1.24689	-1.15377	-1.41761
-1.18245	-1.45926	1.08781	-2.09457
-1.29742	-1.29663	1.26584	1.58107
-1.1035	-1.12218	1.06706	-1.16027
1.2723	-1.3918	1.22153	-1.19289
-1.09708	-1.47651	-1.04417	-1.60772
-1.25619	-1.35023	1.20791	-1.37723
-1.06197	-1.81401	-1.00653	-1.71658
-1.20312	-1.59601	1.13154	-1.68923
1.21597	-1.38578	-1.00945	-1.41696
-1.19834	-1.30527	1.05889	-1.20467
-1.13238	-1.42741	1.32565	-1.1514
-1.49743	-1.44196	1.00686	-1.61127
-1.22004	-1.24223	1.04446	-1.12963
-1.17177	-1.59634	1.20774	1.09406
-1.02824	-1.35731	-1.12731	-1.47394
-1.26455	-1.06411	1.03719	-1.456
1.58811	1.69895	1.15324	-1.47937
-1.04732	-1.21619	1.16416	-1.4314
1.39067	-1.4236	1.04706	-1.52122
-1.10504	-1.45356	1.30124	-1.07077
-1.05745	-1.37008	-1.02411	-1.21399
1.04122	-1.35336	-1.05325	1.68735
-1.03153	-1.22464	-1.05649	1.38661
-1.29509	-1.4449	1.10844	1.49842
-1.09932	-1.24228	1.13077	1.04644
-1.19886	-1.48604	-1.09631	1.38082
1.1158	-1.38061	1.10631	1.44883
-1.00814	-1.47772	1.21415	-1.37501
-1.09078	-1.39824	1.02224	1.41509
-1.16288	-1.58785	1.01827	1.27883
-1.02997	-1.37705	1.35059	-1.35734
-1.12828	-1.45178	1.08801	1.39875
-1.10946	-1.32316	-1.01168	-1.36979
-1.02004	-1.20512	-1.02674	-1.50251
-1.16719	-1.38135	1.00773	-1.09878
-1.16324	-1.46669	1.02074	-1.71941
-1.22474	-1.3277	1.20015	-1.40403
-1.08121	-1.14387	1.08284	1.07273
-1.19984	-1.15531	1.07856	1.41531
-1.06875	-1.5324	1.12519	-1.40631
-1.26753	-1.35001	1.19861	-1.49215
-1.08522	-1.33219	1.26171	-1.19335
-1.05798	-1.44645	1.05858	-1.46281
-1.12042	-1.10908	1.09612	-1.45243
-1.09959	-1.19435	-1.00922	1.44016
-1.06873	-1.35914	-1.00579	1.28355
-1.00924	-1.40476	-1.12468	1.21336
1.2348	-1.03162	1.06094	1.38306
-1.53174	-1.34814	1.11282	-1.26523
-1.04665	-1.36941	-1.05155	1.37828
-1.49719	-1.21883	1.13829	1.25976
1.38741	-1.18499	1.05123	1.44774
-1.02462	1.44248	1.05953	1.63376
-1.10603	-1.34691	1.04506	1.24551
-1.02015	-1.45393	1.08215	-1.22657
-1.06295	-1.4213	-1.0198	-1.28556
-1.08496	-1.3184	1.08044	1.11609
1.26513	-1.36862	1.00777	-1.39643
-1.05814	-1.26819	1.031	-1.31583
-1.56113	1.53638	1.13437	-1.05021
-1.0662	-1.35194	1.04865	-1.04345
-1.03785	-1.44143	1.04315	-1.44558
-1.08318	-1.23671	1.01604	-1.04472
-1.17999	1.41036	1.01943	-1.48118
-1.03727	-1.13514	1.13888	1.24462
-1.135	-1.05486	-1.05305	-1.27148
-1.04302	-1.14796	1.00858	-1.32483
-1.01413	-1.46719	1.04842	-1.10446
-1.00299	-1.05258	1.07208	1.40902
-1.16273	-1.44062	1.12066	-1.13525
-1.08983	-1.30263	1.10511	-1.22297
1.15015	-1.70529	1.13492	-1.25951
1.08018	-1.20796	1.1636	-1.27891
-1.02321	-1.39601	-1.01942	-1.2187
-1.01154	-1.28912	1.16142	-1.22052
-1.04007	-1.36474	1.04461	1.27863
-1.03847	-1.4755	1.03901	-1.45658
1.15387	-1.19026	1.07834	-1.13915
-1.01609	-1.0997	1.14317	1.2433
-1.04201	1.22208	1.00724	-1.37219
1.17475	-1.25147	1.07259	-1.35989
-1.00905	-1.49277	1.10673	1.10028
-1.30727	-1.4023	1.08583	-1.29034
-1.03368	-1.33698	1.00659	-1.28769
-1.0163	-1.4341	1.01322	1.19627
-1.02183	-1.34598	1.06546	1.31251
-1.01356	-1.23815	1.05962	-1.44663
-1.00281	-1.38838	1.11786	-1.16985
-1.04581	-1.29537	1.0576	-1.18584
1.09246	-1.23591	3.88056	-1.01681
1.19939	-1.15224	2.40282	-1.07345
1.00451	-1.38215	2.42062	-1.09216
-1.19088	-1.42739	2.784	-1.20331
-1.06066	-1.02483	3.56965	-1.00118
1.05996	-1.35399	1.80653	-1.23119
-1.41045	-1.2873	1.76267	1.23295
-1.01611	-1.21607	-1.35335	-1.23183
1.16131	-1.15448	2.00682	-1.0696
-1.11318	-1.353	1.91812	-1.16921
-1.02096	-1.30666	2.31529	1.0959
1.11812	-1.33271	2.08772	1.10363
-1.02566	-1.39662	3.73654	1.40234
1.07974	-1.03046	2.45307	-1.18216
-1.01648	-1.4121	2.05884	-1.10858
1.02798	-1.45391	2.72671	-1.18458
-1.58342	-1.1552	3.06765	-1.15122
1.6542	-1.43669	1.24077	-1.15343
1.01209	-1.3042	2.95542	-1.42135
-1.04329	-1.1265	1.84851	1.01837
-1.08644	-1.23243	2.01455	-1.11738
1.07043	-1.08825	1.58219	1.07454
1.19557	-1.24255	-2.17408	-1.04815
-1.02879	-1.17146	-1.63405	-1.184
1.01098	-1.16583	2.50972	-1.05917
-1.00942	-1.07236	1.85243	-1.07895
1.1292	-1.14344	2.17197	-1.01197
-1.02891	-1.33898	-1.91926	-1.01913
1.09894	1.50478	-1.67399	-1.0748
1.06762	-1.34167	1.82208	-1.03659
1.01365	-1.2028	1.93311	1.64048
1.20041	-1.36818	1.95405	-1.23024
1.01533	-1.17841	1.72226	1.39515
-1.09646	-1.35709	2.64904	-1.0534
1.05951	-1.18562	-1.60745	-1.02148
1.14617	-1.30943	-1.93704	1.06696
1.06748	-1.33104	1.73346	-1.07256
-1.02338	-1.25709	-1.8174	1.38209
1.00925	-1.27583	2.21774	1.114
-3.89828	-1.40967	1.80718	-1.09043
-1.7693	-1.10919	1.46046	-1.07905
-2.28953	1.56131	-1.45505	-1.50738
-2.25274	-1.28089	1.56852	1.07765
-2.05169	-1.15067	2.21455	-1.0757
-1.14417	-1.36627	1.56229	1.07957
2.04586	-1.35574	2.07429	-1.09463
-1.36892	-1.46796	2.23882	-1.07684
-2.45932	-1.36652	1.19143	-1.04173
-1.9527	-1.49991	1.68213	-1.03688
-1.01014	-1.286	-1.61615	1.07592
-1.11491	-1.37779	1.28662	1.07678
-1.76303	-1.20682	1.73052	-1.16301
1.73097	-1.28259	-1.80321	-1.04273
-1.72367	-1.3358	1.55224	1.03307
-1.09597	-1.33961	-1.72635	1.0132
-1.12591	-1.2558	1.7341	1.05971
-1.12789	-1.01928	1.24151	1.10254
-2.44447	-1.67294	2.01558	-1.04854
-1.57396	-1.13523	1.07076	-1.01083
2.05805	-1.1765	1.41283	-1.0475
-1.92328	-1.12849	-1.76012	1.2383
-1.64139	-1.35839	-1.77105	1.14105
-1.06156	-1.30989	-1.75777	-1.06924
-1.36524	-1.35467	1.34041	-1.00189
-1.64931	-1.10445	1.61892	-1.28857
-1.81639	-1.25885	-1.71417	-1.05473
-1.11486	-1.16686	-1.49374	-1.01161
-1.64226	-1.44027	-1.21034	1.06588
-1.30461	-1.3828	1.22573	-1.46058
-1.60516	-1.20052	2.02378	-1.01728
-1.50715	-1.33356	1.64188	1.03451
-1.06115	-1.36547	1.56321	-1.07105
-1.06428	-1.43983	1.68242	-1.11769
-1.32837	-1.15024	1.62947	1.11247
-1.73905	1.31066	1.94167	-1.05987
-1.41638	-1.196	1.15767	-1.26791
-1.48655	-1.33522	2.1522	-1.01595
1.27522	-1.5158	1.21635	1.07319
-1.5283	-1.03406	1.56161	-1.00026
-1.30936	-1.17187	1.4888	-1.37451
-1.398	-1.34883	-1.67994	-1.15971
-1.61601	-1.27347	1.9922	1.28881
-1.55866	-1.12284	1.91996	-1.14405
1.58261	-1.54857	1.14023	1.00626
-1.21127	1.32739	1.77337	-1.03347
-1.06108	-1.47539	-1.00592	1.24144
-1.50656	-1.21225	1.62821	-1.01065
-1.33314	-1.34055	1.5398	1.07054
-1.02455	-1.54498	1.85713	-1.11819
-1.29293	-1.36732	1.05675	-1.07915
-1.37392	-1.27991	1.55353	-1.00098
-1.12499	-1.12159	-1.77791	-1.31863
-1.59286	-1.19625	1.31504	-1.03207
-1.2342	-1.24803	1.125	-1.13549
-1.25772	-1.21476	1.26294	1.01996
-1.32577	-1.06529	1.53802	-1.05367
-1.42144	-1.40536	1.58529	-1.30871
-1.19726	-1.0124	-1.38243	-1.03364
-1.3072	-1.37498	-1.58336	-1.18867
-1.32219	-1.36034	-1.6553	1.01346
1.40349	-1.24277	1.11977	-1.151
-1.08962	-1.29267	1.7685	-1.05283
-1.67865	-1.69818	1.86969	-1.02666
-1.30412	1.04164	1.5188	-1.00873
-1.30593	-1.50781	1.46151	-1.35177
1.05096	-1.20266	1.6431	-1.09697
-1.1771	-1.4952	2.01602	-1.00049
1.52874	-1.30469	1.49191	-1.25494
-1.26911	-1.24747	1.47446	1.06769
-1.094	-1.21281	1.86716	-1.01363
-1.07014	-1.15966	1.45304	-1.00231
-1.0685	-1.33709	-1.27942	-1.11118
-1.17647	-1.32069	1.13083	-1.03208
-1.07141	-1.16345	1.11109	-1.00439
1.39062	-1.39347	1.36849	-1.1107
-1.23891	-1.3074	-1.29869	-1.01935
-1.31461	1.26479	1.46911	-1.04149
-1.26624	-1.15612	1.68705	-1.40027
-1.0721	-1.14503	-1.32838	-1.08094
-1.25722	-1.30732	-1.47267	2.13673
-1.26119	-1.18015	1.4297	1.76023
-1.10268	-1.24042	1.81859	1.22431
-1.16857	-1.23713	-1.32698	-3.41541
-1.73105	-1.37693	1.67684	-1.89667
1.30368	-1.29111	-1.416	-1.64127
-1.29755	-1.28385	1.18517	-1.58264
-1.05809	-1.29976	1.03953	1.77855
-1.31237	-1.25141	1.20917	1.92248
-1.13223	-1.20069	1.43857	1.23357
-1.13084	-1.24163	1.25133	-1.59415
-1.22992	-1.13233	1.37771	-1.45694
-1.40655	-1.31949	1.7069	2.06803
-1.19232	-1.12004	-1.25544	1.34798
-1.2313	-1.41552	1.1719	-1.40689
-1.11361	-1.51819	1.51888	2.34936
1.03161	-1.043	-1.06102	1.34257
-1.1	-1.09162	-1.40706	-2.24702
-1.07088	-1.26153	-1.35381	-1.31943
-1.19247	-1.05947	1.55563	-2.12044
-1.19765	-1.19644	-1.18608	-2.28773
-1.18245	-1.16752	1.25855	1.89727
-1.29742	-1.13308	1.42655	-1.7477
-1.1035	-1.34312	1.12003	1.36914
1.2723	-1.05696	1.76372	-2.05449
-1.09708	-1.15963	-1.51734	-2.297
-1.25619	-1.55917	-1.02188	-1.45447
-1.06197	-1.04984	1.89305	1.28282
-1.20312	-1.23893	1.53267	-1.92625
1.21597	-1.03855	1.39686	-1.85368
-1.19834	-1.24306	1.69926	2.345
-1.13238	-1.24126	1.01015	-1.25971
-1.49743	-1.00177	1.0139	2.23661
-1.22004	-1.09278	-1.1451	-1.172
-1.17177	-1.33039	-1.21879	1.64992
-1.02824	-1.39355	1.23127	1.24141
-1.26455	-1.20143	-1.04779	2.3079
1.58811	-1.28703	-1.31835	2.02769
-1.04732	-1.17711	1.48945	-1.2488
1.39067	-1.06979	1.55215	2.58375
-1.10504	-1.1614	1.6026	-1.94389
-1.05745	-1.24574	1.39167	-1.58753
1.04122	-1.23299	-1.31454	-1.44857
-1.03153	1.35518	1.19341	-1.14956
-1.29509	-1.48478	-1.33167	-1.15046
-1.09932	-1.30461	-1.33524	-1.85281
-1.19886	-1.17823	1.79371	1.94422
1.1158	-1.03245	-1.14547	-1.85655
-1.00814	-1.42164	-1.06769	1.74028
-1.09078	-1.23593	-1.53128	-1.63739
-1.16288	-1.26339	1.41207	-1.01528
-1.02997	-1.15992	-1.48112	-2.09649
-1.12828	-1.2815	1.63043	1.05405
-1.10946	-1.22102	-1.17323	1.6324
-1.02004	-1.34099	1.04067	-1.25954
-1.16719	-1.57201	1.58361	-1.00489
-1.16324	-1.10292	1.32922	2.08146
-1.22474	-1.22094	-1.07811	-1.53433
-1.08121	-1.25492	-1.13006	-1.23419
-1.19984	-1.23424	1.23465	1.73474
-1.06875	-1.17617	1.29953	-1.41761
-1.26753	-1.22102	1.07068	-2.09457
-1.08522	-1.27392	1.31799	1.58107
-1.05798	-1.18014	1.4857	-1.16027
-1.12042	1.51327	1.14256	-1.19289
-1.09959	-1.26431	1.21989	-1.60772
-1.06873	1.55741	1.3405	-1.37723
-1.00924	-1.11844	1.49504	-1.71658
1.2348	-1.05659	1.1847	-1.68923
-1.53174	-1.00076	1.39615	-1.41696
-1.04665	-1.14712	1.70277	-1.20467
-1.49719	-1.15712	-1.20218	-1.1514
1.38741	-1.30151	-1.29576	-1.61127
-1.02462	-1.16019	1.08628	-1.12963
-1.10603	-1.29431	1.17376	1.09406
-1.02015	-1.36255	1.447	-1.47394
-1.06295	-1.15753	1.43492	-1.456
-1.08496	-1.19988	-1.05667	-1.47937
1.26513	-1.20673	1.19546	-1.4314
-1.05814	-1.24546	1.2541	-1.52122
-1.56113	-1.28667	1.16081	-1.07077
-1.0662	-1.13186	1.3595	-1.21399
-1.03785	-1.13522	-1.06187	1.68735
-1.08318	-1.0861	1.46975	1.38661
-1.17999	-1.18898	1.2534	1.49842
-1.03727	-1.20579	-1.06561	1.04644
-1.135	-1.24814	-1.25477	1.38082
-1.04302	-1.04681	1.34914	1.44883
-1.01413	-1.0249	-1.23522	-1.37501
-1.00299	-1.24287	1.11149	1.41509
-1.16273	-1.20735	1.05634	1.27883
-1.08983	-1.17801	1.52783	-1.35734
1.15015	-1.20498	1.26906	1.39875
1.08018	-1.24391	1.46375	-1.36979
-1.02321	-1.13162	1.42101	-1.50251
-1.01154	-1.19592	-1.15943	-1.09878
-1.04007	-1.11314	-1.14049	-1.71941
-1.03847	-1.21453	1.13083	-1.40403
1.15387	-1.19185	1.08998	1.07273
-1.01609	-1.1748	1.13079	1.41531
-1.04201	1.12002	1.13004	-1.40631
1.17475	-1.16721	1.28841	-1.49215
-1.00905	-1.24966	1.38799	-1.19335
-1.30727	-1.056	1.51022	-1.46281
-1.03368	-1.04321	-1.03585	-1.45243
-1.0163	-1.22155	1.09502	1.44016
-1.02183	-1.11445	1.26922	1.28355
-1.01356	-1.08239	-1.15418	1.21336
-1.00281	-1.10358	1.24301	1.38306
-1.04581	-1.19316	-1.03636	-1.26523
1.09246	-1.23018	-1.16203	1.37828
1.19939	-1.2157	1.12527	1.25976
1.00451	-1.18695	1.22886	1.44774
-1.19088	-1.08564	-1.04833	1.63376
-1.06066	-1.18305	1.14903	1.24551
1.05996	-1.06178	1.18686	-1.22657
-1.41045	1.68048	1.19677	-1.28556
-1.01611	-1.30517	-1.06516	1.11609
1.16131	-1.23717	1.1659	-1.39643
-1.11318	1.2896	1.26959	-1.31583
-1.02096	-1.17504	1.36357	-1.05021
1.11812	-1.15521	-1.15582	-1.04345
-1.02566	-1.31468	1.35479	-1.44558
1.07974	-1.20901	1.0045	-1.04472
-1.01648	-1.19109	-1.20215	-1.48118
1.02798	-1.25143	-1.05752	1.24462
-1.58342	-1.19888	-1.19581	-1.27148
1.6542	-1.31334	1.37809	-1.32483
1.01209	-1.11038	1.1	-1.10446
-1.04329	-1.16413	-1.16807	1.40902
-1.08644	-1.15225	1.25352	-1.13525
1.07043	-1.16337	-1.20115	-1.22297
1.19557	1.47158	1.33493	-1.25951
-1.02879	-1.01789	-1.13262	-1.27891
1.01098	-1.11699	-1.11765	-1.2187
-1.00942	-1.1955	1.48384	-1.22052
1.1292	-1.1106	1.00176	1.27863
-1.02891	-1.24256	1.33812	-1.45658
1.09894	1.30382	1.39032	-1.13915
1.06762	-1.24786	1.29245	1.2433
1.01365	-1.23713	-1.05929	-1.37219
1.20041	-1.01857	1.28852	-1.35989
1.01533	-1.29187	-1.04648	1.10028
-1.09646	-1.184	-1.01992	-1.29034
1.05951	-1.32002	-1.05089	-1.28769
1.14617	-1.02201	-1.08304	1.19627
1.06748	-1.16368	1.36682	1.31251
-1.02338	-1.20131	-1.12598	-1.44663
1.00925	-1.20519	-1.11539	-1.16985
-3.89828	-1.14293	-1.12396	-1.18584
-1.7693	-1.28883	1.21115	-1.01681
-2.28953	-1.09501	-1.09263	-1.07345
-2.25274	-1.23396	1.08807	-1.09216
-2.05169	-1.14434	1.04157	-1.20331
-1.14417	-1.16939	-1.07016	-1.00118
2.04586	-1.31484	-1.0878	-1.23119
-1.36892	-1.31111	1.05794	1.23295
-2.45932	-1.27088	-1.08827	-1.23183
-1.9527	-1.12557	-1.06921	-1.0696
-1.01014	-1.14249	-1.14328	-1.16921
-1.11491	-1.19451	-1.07727	1.0959
-1.76303	-1.01991	-1.03791	1.10363
1.73097	-1.25332	-1.12459	1.40234
-1.72367	-1.13359	1.27969	-1.18216
-1.09597	-1.16079	1.11067	-1.10858
-1.12591	-1.101	1.08506	-1.18458
-1.12789	-1.18796	1.16744	-1.15122
-2.44447	-1.22284	-1.03709	-1.15343
-1.57396	-1.17094	1.19524	-1.42135
2.05805	-1.29697	1.15982	1.01837
-1.92328	-1.26409	-1.38287	-1.11738
-1.64139	-1.2308	1.09072	1.07454
-1.06156	-1.2111	1.27604	-1.04815
-1.36524	-1.16135	-1.02213	-1.184
-1.64931	-1.02781	-1.15501	-1.05917
-1.81639	-1.16998	-1.07475	-1.07895
-1.11486	-1.22143	-1.0885	-1.01197
-1.64226	-1.06139	1.25441	-1.01913
-1.30461	-1.30499	1.10785	-1.0748
-1.60516	-1.25012	1.06128	-1.03659
-1.50715	1.31442	1.14574	1.64048
-1.06115	-1.12714	-1.14972	-1.23024
-1.06428	-1.14865	-1.08259	1.39515
-1.32837	-1.07504	-1.07065	-1.0534
-1.73905	-1.21194	1.22074	-1.02148
-1.41638	-1.15681	1.05835	1.06696
-1.48655	-1.06371	1.27302	-1.07256
1.27522	-1.17805	1.35972	1.38209
-1.5283	-1.24134	-1.02421	1.114
-1.30936	-1.14449	-1.04438	-1.09043
-1.398	-1.21011	1.02531	-1.07905
-1.61601	1.47139	1.0649	-1.50738
-1.55866	-1.11015	1.11431	1.07765
1.58261	-1.11747	1.12754	-1.0757
-1.21127	-1.10242	1.07529	1.07957
-1.06108	-1.06558	-1.04357	-1.09463
-1.50656	-1.11914	1.22802	-1.07684
-1.33314	-1.36883	1.25751	-1.04173
-1.02455	-1.22865	1.36983	-1.03688
-1.29293	-1.18857	1.05034	1.07592
-1.37392	-1.01398	-1.04434	1.07678
-1.12499	-1.65517	1.24544	-1.16301
-1.59286	-1.27195	1.12149	-1.04273
-1.2342	-1.2083	1.1001	1.03307
-1.25772	-1.07574	1.03257	1.0132
-1.32577	-1.01738	1.00304	1.05971
-1.42144	-1.11217	-1.17056	1.10254
-1.19726	-1.20863	-1.02901	-1.04854
-1.3072	-1.13773	1.05755	-1.01083
-1.32219	-1.15456	1.35297	-1.0475
1.40349	-1.21243	-1.15377	1.2383
-1.08962	-1.00853	1.08781	1.14105
-1.67865	-1.06238	1.26584	-1.06924
-1.30412	-1.18352	1.06706	-1.00189
-1.30593	-1.13065	1.22153	-1.28857
1.05096	-1.10551	-1.04417	-1.05473
-1.1771	-1.1321	1.20791	-1.01161
1.52874	-1.09356	-1.00653	1.06588
-1.26911	-1.1106	1.13154	-1.46058
-1.094	-1.00491	-1.00945	-1.01728
-1.07014	-1.10433	1.05889	1.03451
-1.0685	-1.0703	1.32565	-1.07105
-1.17647	-1.1396	1.00686	-1.11769
-1.07141	-1.20755	1.04446	1.11247
1.39062	-1.22096	1.20774	-1.05987
-1.23891	-1.05726	-1.12731	-1.26791
-1.31461	-1.2281	1.03719	-1.01595
-1.26624	-1.07262	1.15324	1.07319
-1.0721	-1.06904	1.16416	-1.00026
-1.25722	-1.1301	1.04706	-1.37451
-1.26119	-1.43454	1.30124	-1.15971
-1.10268	-1.1385	-1.02411	1.28881
-1.16857	-1.16664	-1.05325	-1.14405
-1.73105	-1.05232	-1.05649	1.00626
1.30368	-1.13147	1.10844	-1.03347
-1.29755	-1.05572	1.13077	1.24144
-1.05809	-1.00918	-1.09631	-1.01065
-1.31237	-1.23491	1.10631	1.07054
-1.13223	-1.06367	1.21415	-1.11819
-1.13084	-1.09816	1.02224	-1.07915
-1.22992	-1.20309	1.01827	-1.00098
-1.40655	1.31241	1.35059	-1.31863
-1.19232	1.53798	1.08801	-1.03207
-1.2313	-1.21532	-1.01168	-1.13549
-1.11361	-1.02032	-1.02674	1.01996
1.03161	-1.12012	1.00773	-1.05367
-1.1	-1.11686	1.02074	-1.30871
-1.07088	-1.1006	1.20015	-1.03364
-1.19247	-1.08665	1.08284	-1.18867
-1.19765	-1.20593	1.07856	1.01346
-1.18245	-1.10409	1.12519	-1.151
-1.29742	-1.19381	1.19861	-1.05283
-1.1035	-1.12308	1.26171	-1.02666
1.2723	-1.15456	1.05858	-1.00873
-1.09708	-1.00895	1.09612	-1.35177
-1.25619	-1.07145	-1.00922	-1.09697
-1.06197	-1.20215	-1.00579	-1.00049
-1.20312	-1.13507	-1.12468	-1.25494
1.21597	-1.22391	1.06094	1.06769
-1.19834	-1.21413	1.11282	-1.01363
-1.13238	-1.12082	-1.05155	-1.00231
-1.49743	-1.13142	1.13829	-1.11118
-1.22004	-1.20154	1.05123	-1.03208
-1.17177	-1.17695	1.05953	-1.00439
-1.02824	-1.21513	1.04506	-1.1107
-1.26455	-1.25908	1.08215	-1.01935
1.58811	-1.07126	-1.0198	-1.04149
-1.04732	-1.28339	1.08044	-1.40027
1.39067	-1.16559	1.00777	-1.08094
-1.10504	-1.00695	1.031	2.13673
-1.05745	-1.14914	1.13437	1.76023
1.04122	-1.08852	1.04865	1.22431
-1.03153	-1.06341	1.04315	-3.41541
-1.29509	-1.20072	1.01604	-1.89667
-1.09932	-1.20835	1.01943	-1.64127
-1.19886	1.43996	1.13888	-1.58264
1.1158	-1.14429	-1.05305	1.77855
-1.00814	-1.23518	1.00858	1.92248
-1.09078	-1.10493	1.04842	1.23357
-1.16288	-1.10166	1.07208	-1.59415
-1.02997	-1.07722	1.12066	-1.45694
-1.12828	-1.08555	1.10511	2.06803
-1.10946	-1.02715	1.13492	1.34798
-1.02004	-1.13733	1.1636	-1.40689
-1.16719	-1.13038	-1.01942	2.34936
-1.16324	-1.074	1.16142	1.34257
-1.22474	-1.14728	1.04461	-2.24702
-1.08121	-1.0879	1.03901	-1.31943
-1.19984	-1.14725	1.07834	-2.12044
-1.06875	1.36413	1.14317	-2.28773
-1.26753	-1.06355	1.00724	1.89727
-1.08522	1.3099	1.07259	-1.7477
-1.05798	-1.00797	1.10673	1.36914
-1.12042	-1.1941	1.08583	-2.05449
-1.09959	-1.10712	1.00659	-2.297
-1.06873	-1.03816	1.01322	-1.45447
-1.00924	-1.10406	1.06546	1.28282
1.2348	-1.12047	1.05962	-1.92625
-1.53174	-1.10577	1.11786	-1.85368
-1.04665	-1.17196	1.0576	2.345
-1.49719	-1.14318	3.88056	-1.25971
1.38741	-1.20606	2.40282	2.23661
-1.02462	-1.10558	2.42062	-1.172
-1.10603	-1.0293	2.784	1.64992
-1.02015	-1.20073	3.56965	1.24141
-1.06295	1.13055	1.80653	2.3079
-1.08496	-1.13207	1.76267	2.02769
1.26513	-1.07448	-1.35335	-1.2488
-1.05814	-1.12716	2.00682	2.58375
-1.56113	-1.03925	1.91812	-1.94389
-1.0662	-1.1404	2.31529	-1.58753
-1.03785	-1.11249	2.08772	-1.44857
-1.08318	-1.18261	3.73654	-1.14956
-1.17999	-1.11106	2.45307	-1.15046
-1.03727	-1.10332	2.05884	-1.85281
-1.135	-1.18447	2.72671	1.94422
-1.04302	-1.14933	3.06765	-1.85655
-1.01413	-1.20934	1.24077	1.74028
-1.00299	-1.09068	2.95542	-1.63739
-1.16273	-1.05267	1.84851	-1.01528
-1.08983	1.17265	2.01455	-2.09649
1.15015	-1.18263	1.58219	1.05405
1.08018	-1.23312	-2.17408	1.6324
-1.02321	-1.01992	-1.63405	-1.25954
-1.01154	-1.0616	2.50972	-1.00489
-1.04007	-1.06516	1.85243	2.08146
-1.03847	-1.08963	2.17197	-1.53433
1.15387	-1.03271	-1.91926	-1.23419
-1.01609	-1.06893	-1.67399	1.73474
-1.04201	-1.17085	1.82208	-1.41761
1.17475	-1.13388	1.93311	-2.09457
-1.00905	-1.03639	1.95405	1.58107
-1.30727	-1.12717	1.72226	-1.16027
-1.03368	-1.07529	2.64904	-1.19289
-1.0163	-1.13822	-1.60745	-1.60772
-1.02183	-1.11335	-1.93704	-1.37723
-1.01356	-1.04993	1.73346	-1.71658
-1.00281	-1.09007	-1.8174	-1.68923
-1.04581	-1.14691	2.21774	-1.41696
1.09246	-1.17078	1.80718	-1.20467
1.19939	-1.18066	1.46046	-1.1514
1.00451	-1.02735	-1.45505	-1.61127
-1.19088	-1.19079	1.56852	-1.12963
-1.06066	-1.08401	2.21455	1.09406
1.05996	-1.01163	1.56229	-1.47394
-1.41045	-1.08794	2.07429	-1.456
-1.01611	-1.02132	2.23882	-1.47937
1.16131	-1.2012	1.19143	-1.4314
-1.11318	-1.06364	1.68213	-1.52122
-1.02096	-1.00368	-1.61615	-1.07077
1.11812	-1.03089	1.28662	-1.21399
-1.02566	-1.06728	1.73052	1.68735
1.07974	-1.01717	-1.80321	1.38661
-1.01648	-1.34215	1.55224	1.49842
1.02798	-1.34692	-1.72635	1.04644
-1.58342	-1.13488	1.7341	1.38082
1.6542	-1.09561	1.24151	1.44883
1.01209	-1.09425	2.01558	-1.37501
-1.04329	-1.14484	1.07076	1.41509
-1.08644	-1.37754	1.41283	1.27883
1.07043	-1.10125	-1.76012	-1.35734
1.19557	-1.00568	-1.77105	1.39875
-1.02879	-1.18978	-1.75777	-1.36979
1.01098	-1.23395	1.34041	-1.50251
-1.00942	-1.13296	1.61892	-1.09878
1.1292	-1.13309	-1.71417	-1.71941
-1.02891	-1.1265	-1.49374	-1.40403
1.09894	-1.40336	-1.21034	1.07273
1.06762	-1.17796	1.22573	1.41531
1.01365	-1.05781	2.02378	-1.40631
1.20041	-1.17565	1.64188	-1.49215
1.01533	-1.07582	1.56321	-1.19335
-1.09646	-1.07307	1.68242	-1.46281
1.05951	-1.55038	1.62947	-1.45243
1.14617	-1.12902	1.94167	1.44016
1.06748	-1.17102	1.15767	1.28355
-1.02338	-1.06503	2.1522	1.21336
1.00925	-1.01582	1.21635	1.38306
-3.89828	-1.01387	1.56161	-1.26523
-1.7693	-1.05248	1.4888	1.37828
-2.28953	-1.08506	-1.67994	1.25976
-2.25274	-1.04657	1.9922	1.44774
-2.05169	-1.00744	1.91996	1.63376
-1.14417	-1.09309	1.14023	1.24551
2.04586	-1.13148	1.77337	-1.22657
-1.36892	-1.15107	-1.00592	-1.28556
-2.45932	-1.07103	1.62821	1.11609
-1.9527	-1.2938	1.5398	-1.39643
-1.01014	-1.15252	1.85713	-1.31583
-1.11491	-1.19875	1.05675	-1.05021
-1.76303	-1.05485	1.55353	-1.04345
1.73097	-1.0889	-1.77791	-1.44558
-1.72367	1.40226	1.31504	-1.04472
-1.09597	-1.1857	1.125	-1.48118
-1.12591	-1.11633	1.26294	1.24462
-1.12789	-1.09304	1.53802	-1.27148
-2.44447	1.22906	1.58529	-1.32483
-1.57396	-1.13754	-1.38243	-1.10446
2.05805	-1.02459	-1.58336	1.40902
-1.92328	-1.11157	-1.6553	-1.13525
-1.64139	-1.00397	1.11977	-1.22297
-1.06156	-1.1422	1.7685	-1.25951
-1.36524	-1.156	1.86969	-1.27891
-1.64931	-1.12732	1.5188	-1.2187
-1.81639	-1.06346	1.46151	-1.22052
-1.11486	-1.04447	1.6431	1.27863
-1.64226	-1.07525	2.01602	-1.45658
-1.30461	-1.05828	1.49191	-1.13915
-1.60516	1.00365	1.47446	1.2433
-1.50715	-1.0619	1.86716	-1.37219
-1.06115	-1.05114	1.45304	-1.35989
-1.06428	-1.03338	-1.27942	1.10028
-1.32837	-1.03638	1.13083	-1.29034
-1.73905	-1.09685	1.11109	-1.28769
-1.41638	-1.1033	1.36849	1.19627
-1.48655	-1.1005	-1.29869	1.31251
1.27522	-1.07828	1.46911	-1.44663
-1.5283	1.02214	1.68705	-1.16985
-1.30936	-1.02419	-1.32838	-1.18584
-1.398	-1.04727	-1.47267	-1.01681
-1.61601	-1.08764	1.4297	-1.07345
-1.55866	-1.65736	1.81859	-1.09216
1.58261	-1.12022	-1.32698	-1.20331
-1.21127	-1.01983	1.67684	-1.00118
-1.06108	-1.12208	-1.416	-1.23119
-1.50656	-1.06691	1.18517	1.23295
-1.33314	1.05891	1.03953	-1.23183
-1.02455	-1.0429	1.20917	-1.0696
-1.29293	-1.07103	1.43857	-1.16921
-1.37392	-1.08195	1.25133	1.0959
-1.12499	-1.15119	1.37771	1.10363
-1.59286	-1.13832	1.7069	1.40234
-1.2342	-1.01905	-1.25544	-1.18216
-1.25772	-1.11063	1.1719	-1.10858
-1.32577	-1.06613	1.51888	-1.18458
-1.42144	-1.00499	-1.06102	-1.15122
-1.19726	-1.01461	-1.40706	-1.15343
-1.3072	-1.02795	-1.35381	-1.42135
-1.32219	1.07236	1.55563	1.01837
1.40349	-1.02608	-1.18608	-1.11738
-1.08962	-1.06509	1.25855	1.07454
-1.67865	-1.00196	1.42655	-1.04815
-1.30412	-1.02032	1.12003	-1.184
-1.30593	-1.02062	1.76372	-1.05917
1.05096	1.36048	-1.51734	-1.07895
-1.1771	1.06604	-1.02188	-1.01197
1.52874	-1.10637	1.89305	-1.01913
-1.26911	-1.15116	1.53267	-1.0748
-1.094	-1.12901	1.39686	-1.03659
-1.07014	-1.05311	1.69926	1.64048
-1.0685	-1.05785	1.01015	-1.23024
-1.17647	-1.00463	1.0139	1.39515
-1.07141	1.01837	-1.1451	-1.0534
1.39062	-1.11675	-1.21879	-1.02148
-1.23891	-1.00303	1.23127	1.06696
-1.31461	-1.11391	-1.04779	-1.07256
-1.26624	-1.02296	-1.31835	1.38209
-1.0721	-1.11862	1.48945	1.114
-1.25722	-1.31141	1.55215	-1.09043
-1.26119	-1.00748	1.6026	-1.07905
-1.10268	-1.08464	1.39167	-1.50738
-1.16857	-1.04006	-1.31454	1.07765
-1.73105	-1.04214	1.19341	-1.0757
1.30368	-1.02434	-1.33167	1.07957
-1.29755	-1.03064	-1.33524	-1.09463
-1.05809	-1.07545	1.79371	-1.07684
-1.31237	-1.11114	-1.14547	-1.04173
-1.13223	-1.02282	-1.06769	-1.03688
-1.13084	-1.04243	-1.53128	1.07592
-1.22992	-1.05954	1.41207	1.07678
-1.40655	-1.17521	-1.48112	-1.16301
-1.19232	-1.08734	1.63043	-1.04273
-1.2313	-1.0297	-1.17323	1.03307
-1.11361	-1.08386	1.04067	1.0132
1.03161	-1.0328	1.58361	1.05971
-1.1	-1.07407	1.32922	1.10254
-1.07088	-1.16623	-1.07811	-1.04854
-1.19247	1.06043	-1.13006	-1.01083
-1.19765	-1.02789	1.23465	-1.0475
-1.18245	-1.14991	1.29953	1.2383
-1.29742	-1.04353	1.07068	1.14105
-1.1035	-1.09259	1.31799	-1.06924
1.2723	-1.07536	1.4857	-1.00189
-1.09708	-1.04174	1.14256	-1.28857
-1.25619	-1.25737	1.21989	-1.05473
-1.06197	-1.12935	1.3405	-1.01161
-1.20312	-1.00875	1.49504	1.06588
1.21597	-1.04554	1.1847	-1.46058
-1.19834	-1.03375	1.39615	-1.01728
-1.13238	-1.05466	1.70277	1.03451
-1.49743	-1.06071	-1.20218	-1.07105
-1.22004	-1.06184	-1.29576	-1.11769
-1.17177	-1.03763	1.08628	1.11247
-1.02824	-1.12476	1.17376	-1.05987
-1.26455	-1.03991	1.447	-1.26791
1.58811	-1.02632	1.43492	-1.01595
-1.04732	-1.2008	-1.05667	1.07319
1.39067	-1.01961	1.19546	-1.00026
-1.10504	1.04427	1.2541	-1.37451
-1.05745	-1.14489	1.16081	-1.15971
1.04122	-1.15155	1.3595	1.28881
-1.03153	-1.10858	-1.06187	-1.14405
-1.29509	-1.001	1.46975	1.00626
-1.09932	-1.00002	1.2534	-1.03347
-1.19886	-1.02691	-1.06561	1.24144
1.1158	-1.00368	-1.25477	-1.01065
-1.00814	-1.00207	1.34914	1.07054
-1.09078	-1.02535	-1.23522	-1.11819
-1.16288	-1.04824	1.11149	-1.07915
-1.02997	-1.00859	1.05634	-1.00098
-1.12828	-1.09807	1.52783	-1.31863
-1.10946	-1.01588	1.26906	-1.03207
-1.02004	1.00577	1.46375	-1.13549
-1.16719	-1.02778	1.42101	1.01996
-1.16324	-1.00109	-1.15943	-1.05367
-1.22474	-1.03785	-1.14049	-1.30871
-1.08121	-1.03569	1.13083	-1.03364
-1.19984	-1.01426	1.08998	-1.18867
-1.06875	-1.13065	1.13079	1.01346
-1.26753	-1.09819	1.13004	-1.151
-1.08522	-1.04385	1.28841	-1.05283
-1.05798	-1.10794	1.38799	-1.02666
-1.12042	1.18301	1.51022	-1.00873
-1.09959	-1.03709	-1.03585	-1.35177
-1.06873	-1.53627	1.09502	-1.09697
-1.00924	-1.09275	1.26922	-1.00049
1.2348	-1.05113	-1.15418	-1.25494
-1.53174	-1.07589	1.24301	1.06769
-1.04665	-1.16131	-1.03636	-1.01363
-1.49719	-1.36654	-1.16203	-1.00231
1.38741	-1.05022	1.12527	-1.11118
-1.02462	-1.04488	1.22886	-1.03208
-1.10603	-1.02173	-1.04833	-1.00439
-1.02015	-1.06394	1.14903	-1.1107
-1.06295	-1.17986	1.18686	-1.01935
-1.08496	-1.32762	1.19677	-1.04149
1.26513	-1.06935	-1.06516	-1.40027
-1.05814	-1.04696	1.1659	-1.08094
-1.56113	-1.0282	1.26959	2.13673
-1.0662	-1.14546	1.36357	1.76023
-1.03785	-1.0032	-1.15582	1.22431
-1.08318	-1.03125	1.35479	-3.41541
-1.17999	-1.01848	1.0045	-1.89667
-1.03727	1.19627	-1.20215	-1.64127
-1.135	-1.26569	-1.05752	-1.58264
-1.04302	-1.03596	-1.19581	1.77855
-1.01413	-1.04367	1.37809	1.92248
-1.00299	-1.10521	1.1	1.23357
-1.16273	-1.00966	-1.16807	-1.59415
-1.08983	-1.02911	1.25352	-1.45694
1.15015	-1.02689	-1.20115	2.06803
1.08018	-1.00172	1.33493	1.34798
-1.02321	-1.03754	-1.13262	-1.40689
-1.01154	-1.15374	-1.11765	2.34936
-1.04007	-1.04639	1.48384	1.34257
-1.03847	-1.12676	1.00176	-2.24702
1.15387	-1.0519	1.33812	-1.31943
-1.01609	-1.01554	1.39032	-2.12044
-1.04201	-1.24343	1.29245	-2.28773
1.17475	-1.04583	-1.05929	1.89727
-1.00905	-1.25914	1.28852	-1.7477
-1.30727	-1.01675	-1.04648	1.36914
-1.03368	-1.02801	-1.01992	-2.05449
-1.0163	-1.01899	-1.05089	-2.297
-1.02183	-1.05393	-1.08304	-1.45447
-1.01356	1.33897	1.36682	1.28282
-1.00281	-1.20895	-1.12598	-1.92625
-1.04581	-1.07777	-1.11539	-1.85368
1.09246	-1.01064	-1.12396	2.345
1.19939	-1.07765	1.21115	-1.25971
1.00451	-1.07128	-1.09263	2.23661
-1.19088	-1.11215	1.08807	-1.172
-1.06066	-1.09112	1.04157	1.64992
1.05996	-1.02874	-1.07016	1.24141
-1.41045	-1.01426	-1.0878	2.3079
-1.01611	-1.10837	1.05794	2.02769
1.16131	-1.07205	-1.08827	-1.2488
-1.11318	-1.04034	-1.06921	2.58375
-1.02096	-1.09164	-1.14328	-1.94389
1.11812	-1.10198	-1.07727	-1.58753
-1.02566	-1.00752	-1.03791	-1.44857
1.07974	-1.00679	-1.12459	-1.14956
-1.01648	-1.02353	1.27969	-1.15046
1.02798	-1.01026	1.11067	-1.85281
-1.58342	-1.16796	1.08506	1.94422
1.6542	-1.01081	1.16744	-1.85655
1.01209	-1.07981	-1.03709	1.74028
-1.04329	-1.01716	1.19524	-1.63739
-1.08644	-1.05489	1.15982	-1.01528
1.07043	-1.04202	-1.38287	-2.09649
1.19557	-1.04431	1.09072	1.05405
-1.02879	-1.08802	1.27604	1.6324
1.01098	1.02992	-1.02213	-1.25954
-1.00942	1.18392	-1.15501	-1.00489
1.1292	-1.08168	-1.07475	2.08146
-1.02891	-1.06655	-1.0885	-1.53433
1.09894	-1.00902	1.25441	-1.23419
1.06762	-1.0243	1.10785	1.73474
1.01365	-1.05029	1.06128	-1.41761
1.20041	-1.03638	1.14574	-2.09457
1.01533	-1.04846	-1.14972	1.58107
-1.09646	-1.12035	-1.08259	-1.16027
1.05951	-1.00519	-1.07065	-1.19289
1.14617	-1.0229	1.22074	-1.60772
1.06748	-1.08738	1.05835	-1.37723
-1.02338	-1.01846	1.27302	-1.71658
1.00925	-1.04849	1.35972	-1.68923
-3.89828	-1.1306	-1.02421	-1.41696
-1.7693	-1.19804	-1.04438	-1.20467
-2.28953	-1.01517	1.02531	-1.1514
-2.25274	-1.00184	1.0649	-1.61127
-2.05169	-1.12363	1.11431	-1.12963
-1.14417	1.00763	1.12754	1.09406
2.04586	-1.01838	1.07529	-1.47394
-1.36892	-1.05521	-1.04357	-1.456
-2.45932	-1.02264	1.22802	-1.47937
-1.9527	1.2027	1.25751	-1.4314
-1.01014	1.05498	1.36983	-1.52122
-1.11491	-1.05895	1.05034	-1.07077
-1.76303	1.16587	-1.04434	-1.21399
1.73097	-1.13285	1.24544	1.68735
-1.72367	-1.26776	1.12149	1.38661
-1.09597	1.02318	1.1001	1.49842
-1.12591	-1.02392	1.03257	1.04644
-1.12789	-1.08908	1.00304	1.38082
-2.44447	-1.12654	-1.17056	1.44883
-1.57396	-1.05301	-1.02901	-1.37501
2.05805	-1.11768	1.05755	1.41509
-1.92328	-1.16602	1.35297	1.27883
-1.64139	-1.0133	-1.15377	-1.35734
-1.06156	-1.51323	1.08781	1.39875
-1.36524	-1.02426	1.26584	-1.36979
-1.64931	1.08062	1.06706	-1.50251
-1.81639	-1.00231	1.22153	-1.09878
-1.11486	1.2577	-1.04417	-1.71941
-1.64226	-1.19961	1.20791	-1.40403
-1.30461	-1.01238	-1.00653	1.07273
-1.60516	-1.07626	1.13154	1.41531
-1.50715	-1.00659	-1.00945	-1.40631
-1.06115	-1.10407	1.05889	-1.49215
-1.06428	-1.02277	1.32565	-1.19335
-1.32837	-1.06328	1.00686	-1.46281
-1.73905	-1.20885	1.04446	-1.45243
-1.41638	-1.04562	1.20774	1.44016
-1.48655	-1.04465	-1.12731	1.28355
1.27522	-1.1331	1.03719	1.21336
-1.5283	1.05302	1.15324	1.38306
-1.30936	-1.17401	1.16416	-1.26523
-1.398	-1.16921	1.04706	1.37828
-1.61601	-1.02866	1.30124	1.25976
-1.55866	-1.1381	-1.02411	1.44774
1.58261	-1.35404	-1.05325	1.63376
-1.21127	-1.01391	-1.05649	1.24551
-1.06108	-1.28965	1.10844	-1.22657
-1.50656	-1.02063	1.13077	-1.28556
-1.33314	-1.06385	-1.09631	1.11609
-1.02455	1.38759	1.10631	-1.39643
-1.29293	-1.02932	1.21415	-1.31583
-1.37392	-1.01545	1.02224	-1.05021
-1.12499	1.35661	1.01827	-1.04345
-1.59286	-1.08653	1.35059	-1.44558
-1.2342	1.12548	1.08801	-1.04472
-1.25772	-1.09717	-1.01168	-1.48118
-1.32577	-1.04256	-1.02674	1.24462
-1.42144	1.51093	1.00773	-1.27148
-1.19726	-1.00251	1.02074	-1.32483
-1.3072	1.05631	1.20015	-1.10446
-1.32219	-1.08505	1.08284	1.40902
1.40349	1.0101	1.07856	-1.13525
-1.08962	-1.12025	1.12519	-1.22297
-1.67865	-1.06961	1.19861	-1.25951
-1.30412	-1.01705	1.26171	-1.27891
-1.30593	-1.09234	1.05858	-1.2187
1.05096	1.26201	1.09612	-1.22052
-1.1771	-1.32184	-1.00922	1.27863
1.52874	1.02248	-1.00579	-1.45658
-1.26911	1.03471	-1.12468	-1.13915
-1.094	1.68484	1.06094	1.2433
-1.07014	-1.13225	1.11282	-1.37219
-1.0685	1.00879	-1.05155	-1.35989
-1.17647	1.57618	1.13829	1.10028
-1.07141	-1.22156	1.05123	-1.29034
1.39062	-1.0716	1.05953	-1.28769
-1.23891	1.07981	1.04506	1.19627
-1.31461	-1.13895	1.08215	1.31251
-1.26624	1.36997	-1.0198	-1.44663
-1.0721	1.23152	1.08044	-1.16985
-1.25722	-1.01931	1.00777	-1.18584
-1.26119	1.2364	1.031	-1.01681
-1.10268	-1.18633	1.13437	-1.07345
-1.16857	-1.04144	1.04865	-1.09216
-1.73105	1.05	1.04315	-1.20331
1.30368	1.25002	1.01604	-1.00118
-1.29755	-1.10346	1.01943	-1.23119
-1.05809	1.07007	1.13888	1.23295
-1.31237	1.04352	-1.05305	-1.23183
