# Supplementary material for: Single-cell Transcriptomics of Postimplantation Embryos: Unveiling Aneuploidy Effects and Lineage Dynamics
Source: Research Square preprint supplement (doi:10.21203/rs.3.rs-4111897/v1), 2024-03-22
Supplement: Supplementary file 8 [file c5e4b51987bfcc7ea17c9b22.xlsx]

## Sheet: incoming
Incoming pattern				Outgoing pattern
Pattern	Signaling	Contribution		Pattern	Signaling	Contribution
Pattern 1	PTN	0.994417		Pattern 1	PTN	5.40896e-06
Pattern 2	PTN	0.00558294		Pattern 2	PTN	0.999995
Pattern 1	NECTIN	0.999999		Pattern 1	NECTIN	0.732923
Pattern 2	NECTIN	9.72426354882477e-07		Pattern 2	NECTIN	0.267077
Pattern 1	GDF	0.386605		Pattern 1	GDF	0.999999
Pattern 2	GDF	0.613395		Pattern 2	GDF	8.15237e-07
Pattern 1	MPZ	0.999999		Pattern 1	MPZ	5.40896e-06
Pattern 2	MPZ	9.72426354882477e-07		Pattern 2	MPZ	0.999995
Pattern 1	JAM	0.999999		Pattern 1	JAM	5.40896e-06
Pattern 2	JAM	9.72426354882477e-07		Pattern 2	JAM	0.999995
Pattern 1	TGFb	0.389665		Pattern 1	TGFb	0.999999
Pattern 2	TGFb	0.610335		Pattern 2	TGFb	8.15237e-07
Pattern 1	CDH5	0.0710753		Pattern 1	CDH5	0.930135
Pattern 2	CDH5	0.928925		Pattern 2	CDH5	0.069865
Pattern 1	GAS	0.999999		Pattern 1	GAS	0.492643
Pattern 2	GAS	9.72426354882477e-07		Pattern 2	GAS	0.507357
Pattern 1	IGF	0.878444		Pattern 1	IGF	0.95932
Pattern 2	IGF	0.121556		Pattern 2	IGF	0.04068
Pattern 1	PDGF	4.91951739959801e-06		Pattern 1	PDGF	0.999999
Pattern 2	PDGF	0.999995		Pattern 2	PDGF	8.15237e-07
Pattern 1	SEMA4	0.180709		Pattern 1	SEMA4	0.832257
Pattern 2	SEMA4	0.819291		Pattern 2	SEMA4	0.167743
