# Supplementary material for: Single-cell Transcriptomics of Postimplantation Embryos: Unveiling Aneuploidy Effects and Lineage Dynamics
Source: Research Square preprint supplement (doi:10.21203/rs.3.rs-4111897/v1), 2024-03-22
Supplement: Supplementary file 9 [file f6696434f69e4bdc400bac5c.xlsx]

## Sheet: Sheet1
Lineages	Aneuploid embryos (n=6)
EPI	0	0	0.192982	1*	0	0.0288462
HYPO	0	0.0830508	0.0818713	0	0.0142857	0.00961538		*Significant outlier detected, p<0.01
CTB	0.703297	0.557627	0.561404	0	0	0.326923
EVT	0.241758	0.105085	0.163743	0	0.171429	0.144231
STB	0.0549451	0.254237	0	0	0.814286	0.490385
Lineages	Euploid embryos (n=10)
EPI	0.0983607	0.0462633	0	0.214286	0.0350877	0.0133333	0	0.0561798	0	0	0
HYPO	0.0327869	0	0	0	0	0	0.025641	0	0	0.0721649	0
CTB	0.344262	0.658363	1	0.0714286	0.359649	0.0666667	0.551282	0.146067	0.153846	0.484536	0.315789
EVT	0.229508	0.149466	0	0.142857	0.20614	0.0533333	0.115385	0.101124	0.230769	0.43299	0.333333
STB	0.295082	0.145907	0	0.571429	0.399123	0.866667	0.307692	0.696629	0.615385	0.0103093	0.350877
Lineages	Mosaic embryos (n=3)
EPI	0.037234	0	0.0204082
HYPO	0	0	0.0204082
CTB	0.382979	0.114286	0.217687
EVT	0.0968085	0.142857	0.0884354
STB	0.382979	0.842857	0.653061
